# Supplementary material for: Identification of Pri-miRNA Stem-Loop Interacting Proteins in Plants Using a Modified Version of the Csy4 CRISPR Endonuclease
Source: MDPI journal article supplement (doi:10.3390/ijms23168961), 2022-08-11
Supplement: s1 [file s1]

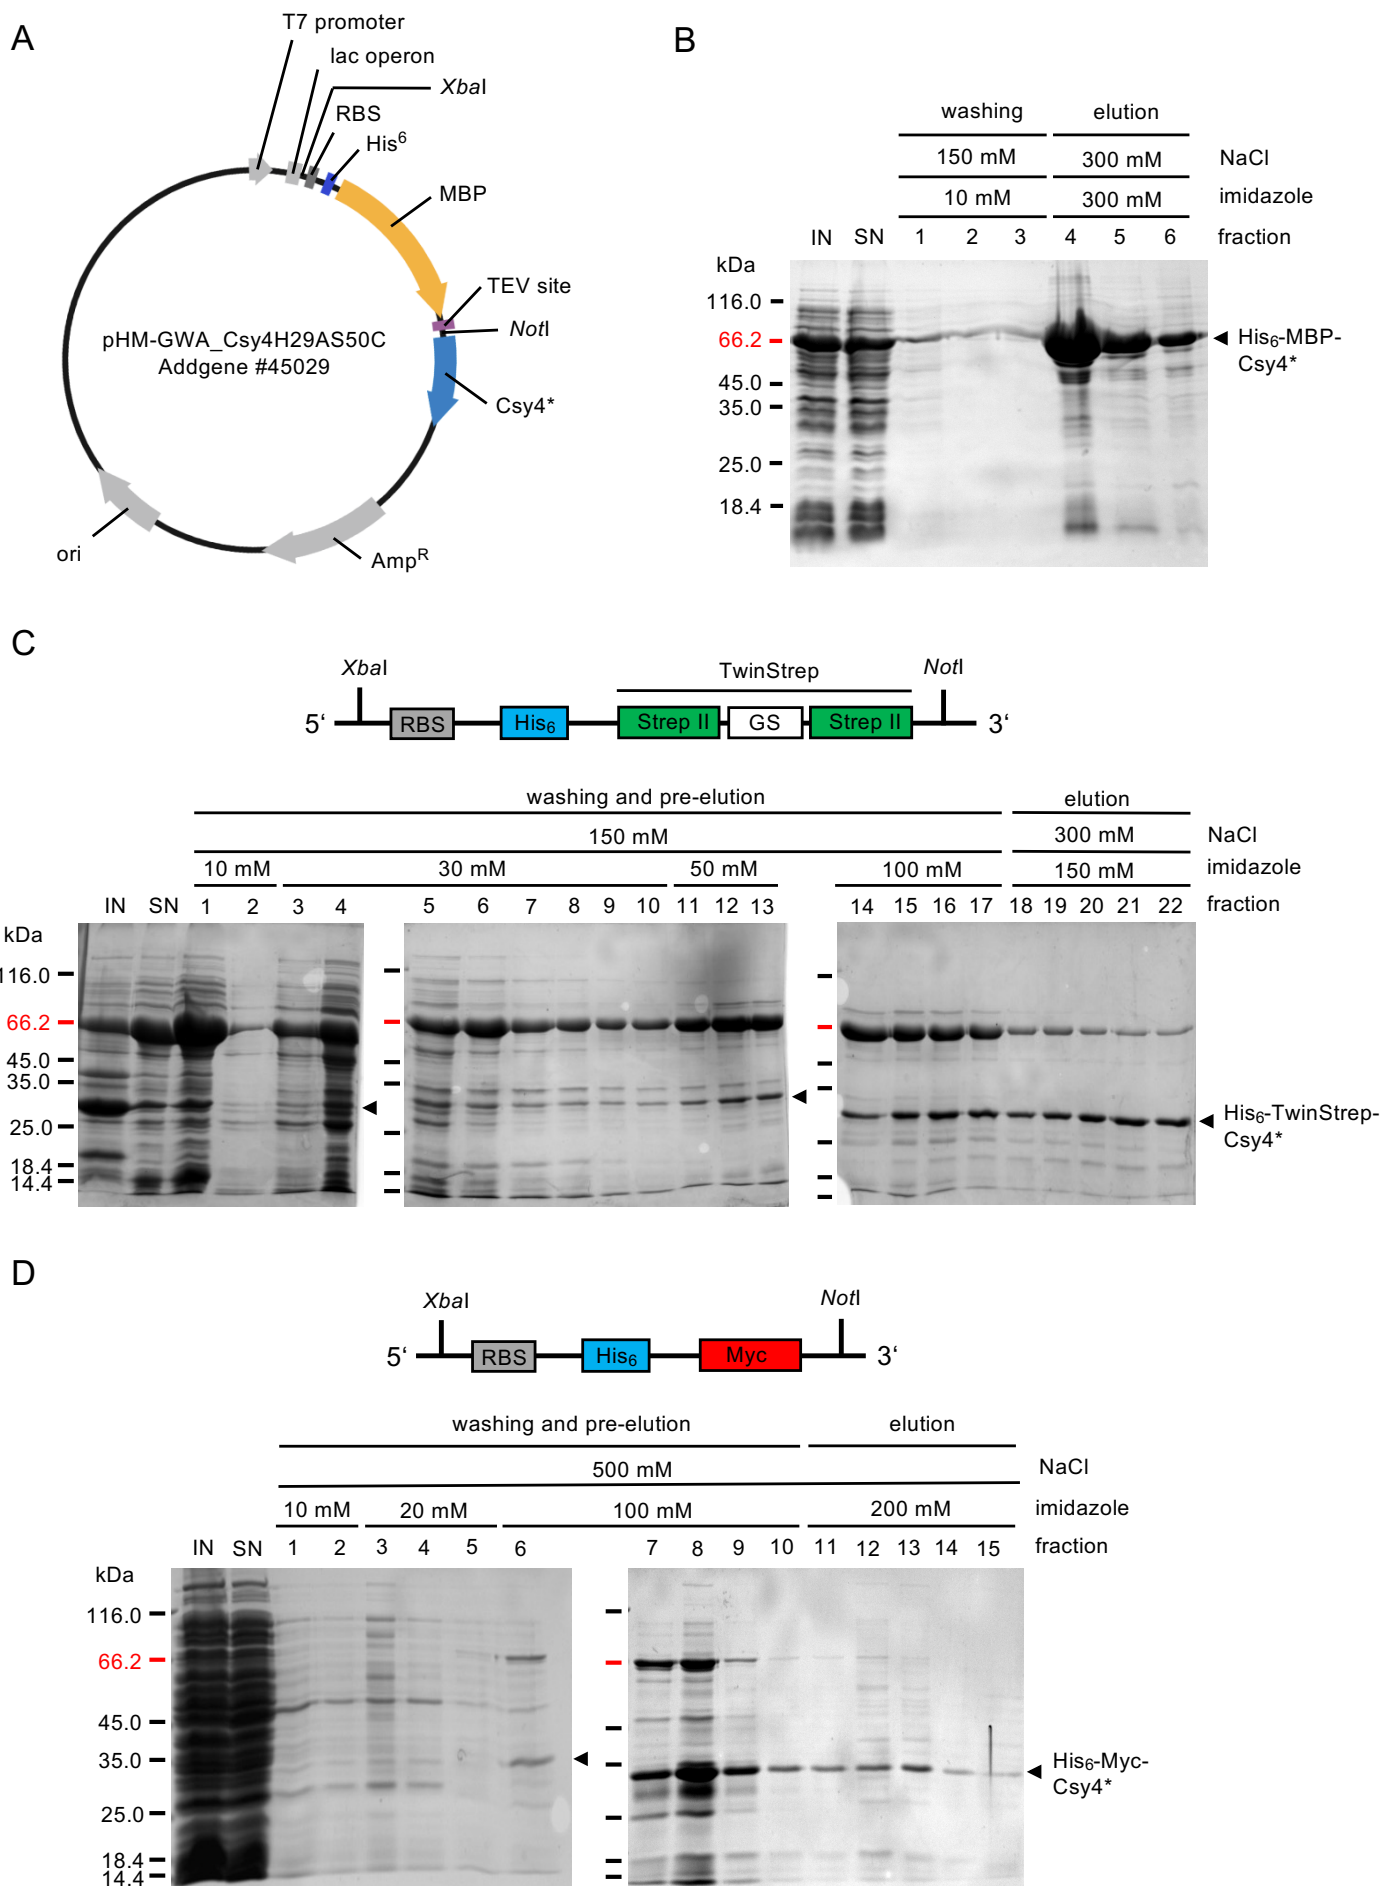

**Figure S1: Recombinant expression and purification of Csy4\* protein variants.**  
(A) Depiction of the pHM-GWA\_Csy4H29AS50C vector (Addgene #45029) used for recombinant expression of His<sub>6</sub>-MBP-Csy4\*. Recombinant expression of His<sub>6</sub>-MBP-Csy4\* (B), His<sub>6</sub>-TwinStrep-Csy4\* (C) and His<sub>6</sub>-Myc-Csy4\* (D). Top panels in C and D represent the sequence regions replacing His<sub>6</sub>-MBP in pHM-GWA\_Csy4H29AS50C. Protein samples were fractionated on SDS-PAGE gels and visualized by coomassie staining. IN, input (total protein extract). SN, supernatant after immunopurification.

A

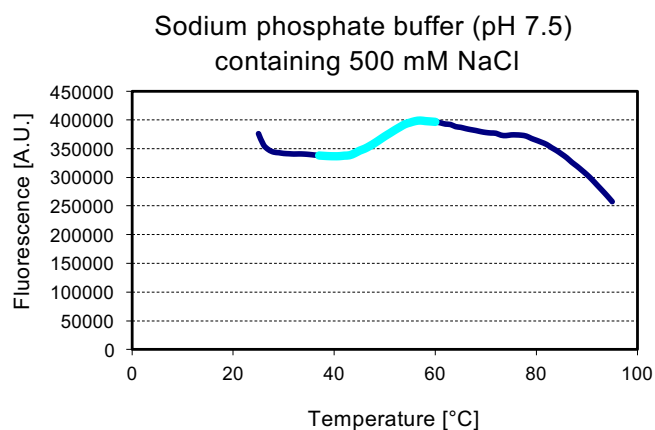

B

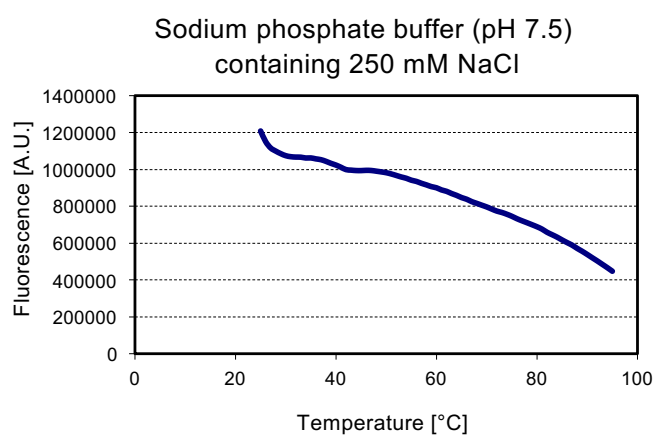

**Figure S2: Measuring the stability of His<sub>6</sub>-Myc-Csy4\* protein by differential scanning fluorimetry (DSF).** Graphs showing recording of fluorescence intensity versus temperature for His<sub>6</sub>-Myc-Csy4\* in sodium phosphate buffer (pH 7.5) containing 500 mM (A) or 250 mM NaCl (B). Protein unfolding is measured by an increase in the fluorescence of the dye SYPRO orange with affinity for hydrophobic parts of the protein, which are exposed as the protein unfolds. A sigmoidal increase in fluorescence to a plateau with gradually increasing temperature is desired and highlighted in light blue [25].

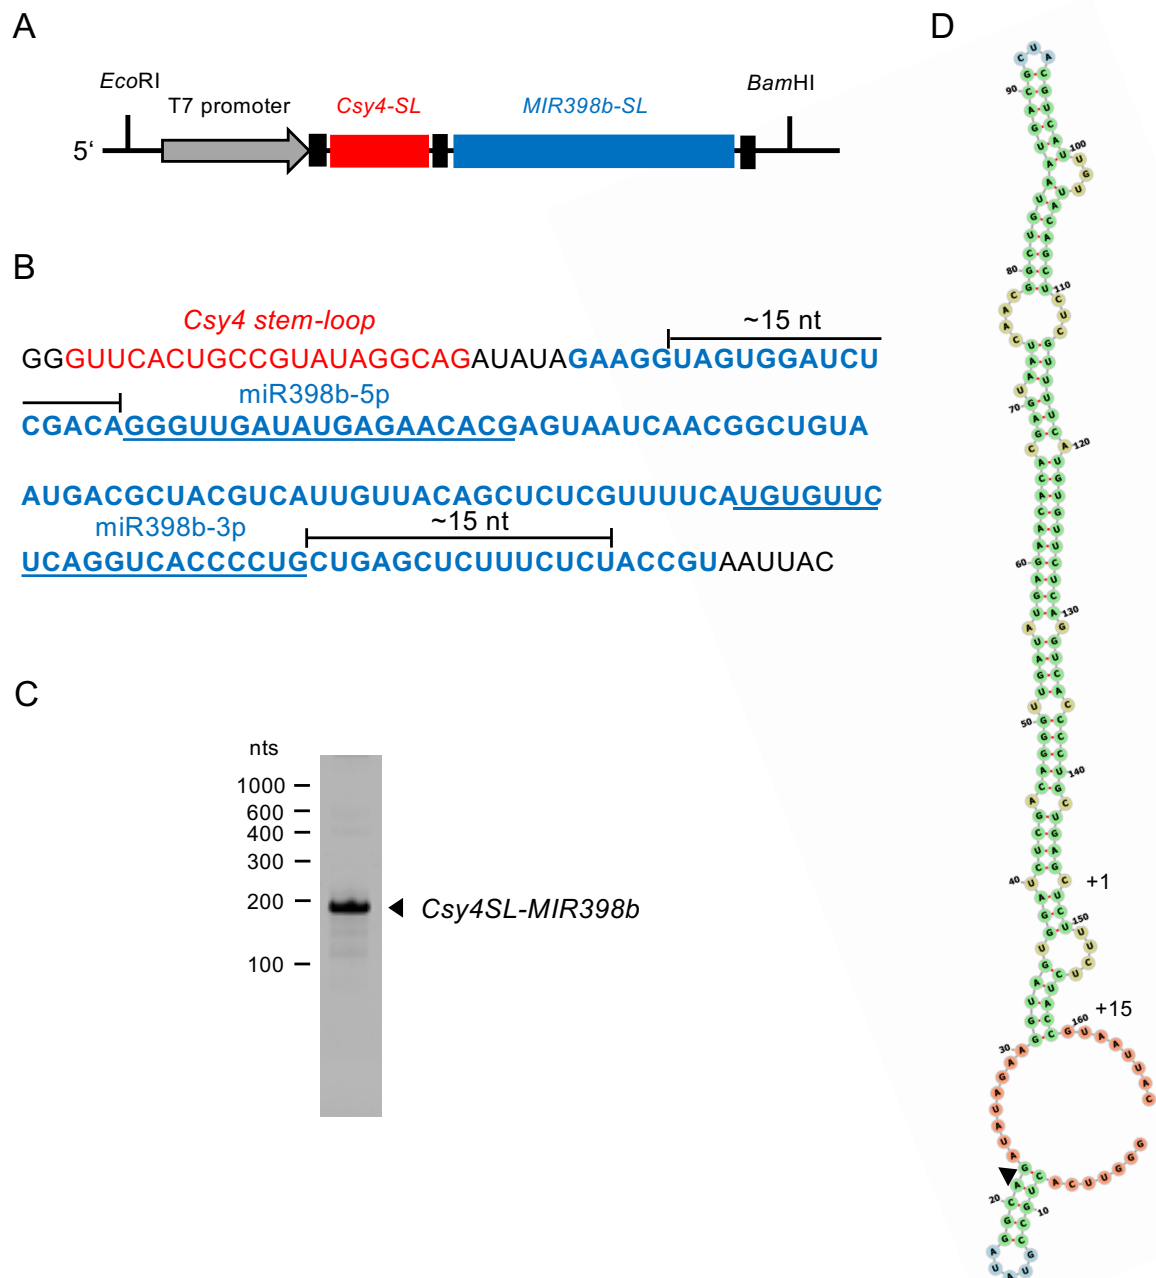

**Figure S3: Design and *in vitro* transcription of the tagged pri-miR398b stem-loop.** (A) Schematic representation of the construct used for *in vitro* transcription of the Csy4-hairpin tagged pri-miR398b stem-loop. (B) Sequence of the *in vitro* transcribed Csy4-hairpin tagged pri-miR398b stem-loop. (C) Visualization of the *in vitro* transcribed Csy4-hairpin tagged pri-miR398b stem-loop (*Csy4SL-MIR398b*) by urea-PAGE. (D) Secondary structure prediction of the Csy4-hairpin tagged pri-miR398b stem-loop using RNAfold from the Vienna RNA Websuite.

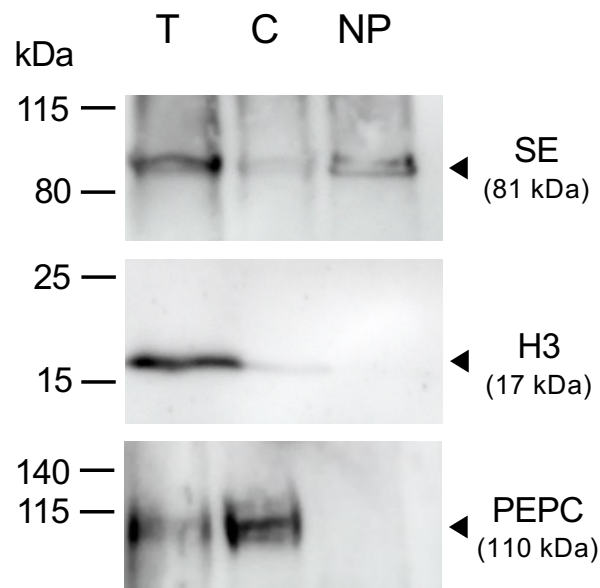

**Figure S4: Purity evaluation of the nucleoplasmic extracts.** Immunoblot analysis was performed with antibodies against specific markers for the nucleoplasm (SERRATE, SE), the chromatin (HISTONE 3, H3), and the cytoplasm (PHOSPHOENOLPYRUVATE CARBOXYLASE, PEPC). T, total protein. C, cytoplasmic fraction. NP, nucleoplasmic fraction.

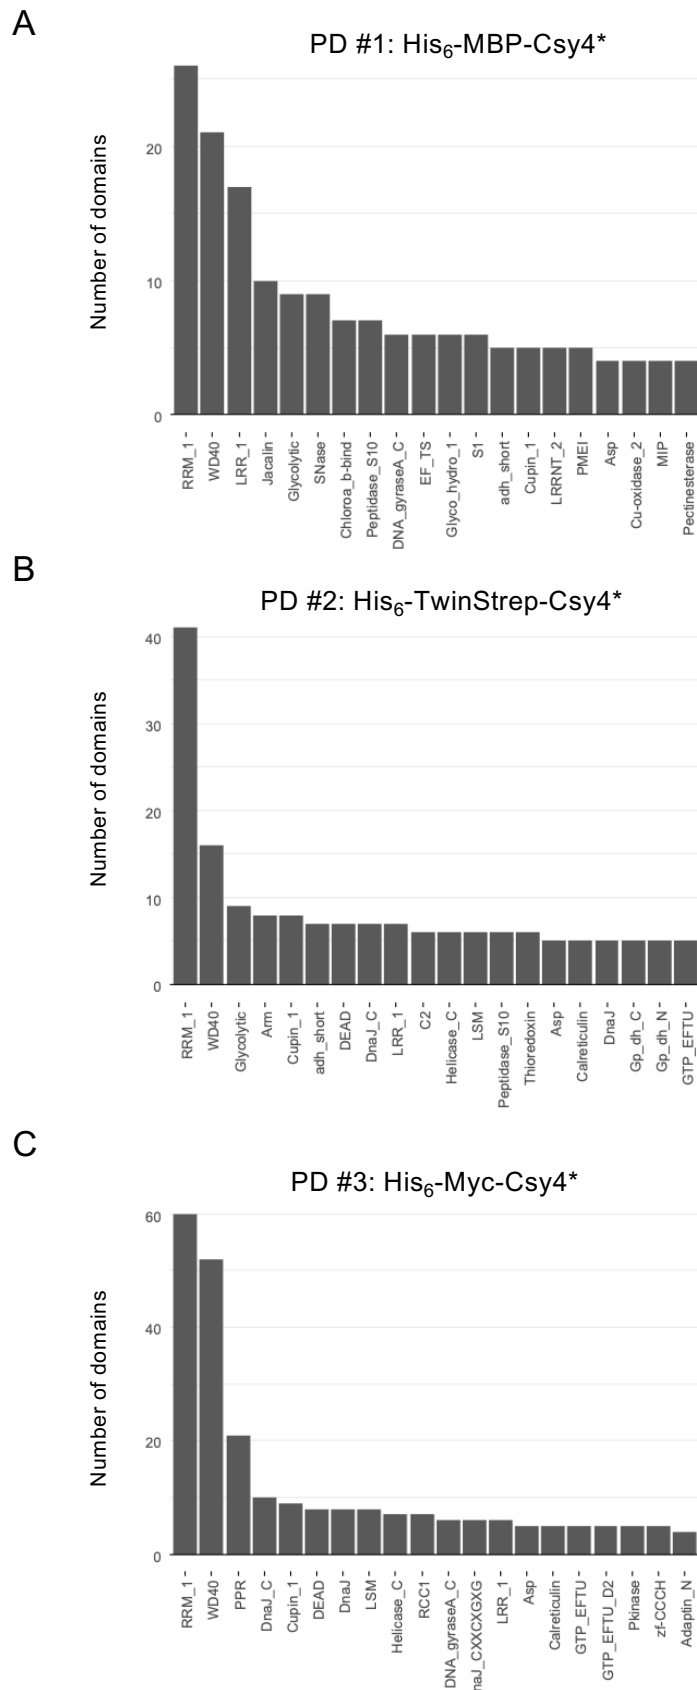

**Figure S5: Top 20 protein domains recognized among co-purified proteins.** Number of domains identified from the His<sub>6</sub>-MBP-Csy4\* (A), His<sub>6</sub>-TwinStrep-Csy4\* (B) or His<sub>6</sub>-Myc-Csy4\* RNA pulldown (C).
