# Supplementary material for: Identification of Pri-miRNA Stem-Loop Interacting Proteins in Plants Using a Modified Version of the Csy4 CRISPR Endonuclease
Source: Int J Mol Sci. 2022 Aug 11;23(16):8961. doi: 10.3390/ijms23168961 (PMC9409100; doi:10.3390/ijms23168961)
Supplement: Supplementary file 1 [file ijms-23-08961-s001.zip]

Archive with 5 entries (5 files):
- Supplementary Materials.pdf
- Table S1.xlsx
- Table S2.xlsx
- Table S3.xlsx
- Table S4.xlsx
