# Supplementary material for: Identification of Pri-miRNA Stem-Loop Interacting Proteins in Plants Using a Modified Version of the Csy4 CRISPR Endonuclease
Source: Int J Mol Sci. 2022 Aug 11;23(16):8961. doi: 10.3390/ijms23168961 (PMC9409100; doi:10.3390/ijms23168961)
Supplement: Supplementary file 1 [file ijms-23-08961-s001.zip › Table S1.xlsx]

## Sheet: Oligonucleotides and gBlocks
Oligos used for qPCR
Name	sequence (5'-3')
pri-miR398a_for	AGAAGAAGAGAAGAACAACAGGAGGTG
pri-miR398a_rev	AAAATGGAACAGGGGAGATTCAAAGGG
pri-miR398b_for	GTTTCCAGCATGTTTGAGAC
pri-miR398b_rev	TTAAAGCATATATTACACATAG
pri-miR398c_for	AAACTCAAACTGTAACAGTC
pri-miR398c_rev	GTGACCTGAGAACACATGAAACGAGAG
PP2A_for	CGATAGTCGACCAAGCGGTT
PP2A_rev	TACCGAACATCAACATCTGG
Oligos used for Northern blotting
Name	sequence (5'-3')
as_miR398	Biotin-CAGGGGTGACCTGAGAACACA
gBlock sequences	sequence (5'-3')
T7_Csy4SL_MIR398bSL	CGGCCAGTGAATTCTAATACGACTCACTATAGGGTTCACTGCCGTATAGGCAGATATAGAAGGTAGTGGATCTCGACAGGGTTGATATGAGAACACACGAGTAATCAACGGCTGTAATGACGCTACGTCATTGTTACAGCTCTCGTTTTCATGTGTTCTCAGGTCACCCCTGCTGAGCTCTTTCTCTACCGTAATTACGGATCCTCTAGAGTCGACC
His6-TwinStrep	ACTTCTAGAAATAATTTTGTTTAACTTTAAGAAGGAGATATACATATGAAATCTTCTCACCATCACCATCACCATGGTTCTTCTGCTAGCTGGAGCCACCCGCAGTTCGAAAAAGGTGGAGGTTCCGGAGGTGGATCGGGAGGTGGATCGTGGAGCCACCCGCAGTTCGAAAAAGGTACCGGATCTTACATCACAAGTTTGTACAAAAAAGCAGGCTCCGCGGCCGCATCG
His6-Myc	ACGACTCACTATAGGGGAATTGTGAGCGGATAACAATTCCCCTCTAGAAATAATTTTGTTTAACTTTAAGAAGGAGATATACCATGGGCAGCAGCCATCATCATCATCATCACGGTACCGAACAAAAGTTGATTTCTGAAGAAGATTTGGAACAGAAACTCATCAGTGAAGAGGATCTGGGTACCGGATCTTACATCACAAGTTTGTACAAAAAAGCAGGCTCCGCGGCCGCCGTACTCGAGGAAAACCTGT
