# Supplementary material for: Identification of Pri-miRNA Stem-Loop Interacting Proteins in Plants Using a Modified Version of the Csy4 CRISPR Endonuclease
Source: Int J Mol Sci. 2022 Aug 11;23(16):8961. doi: 10.3390/ijms23168961 (PMC9409100; doi:10.3390/ijms23168961)
Supplement: Supplementary file 1 [file ijms-23-08961-s001.zip › Table S2.xlsx]

## Sheet: His6-MBP-Csy4
Protein.IDs	Majority.protein.IDs	Peptide.counts..all.	Peptide.counts..razor.unique.	Peptide.counts..unique.	Fasta.headers	Number.of.proteins	Peptides	Razor...unique.peptides	Unique.peptides	Peptides.csyEminus_1	Peptides.csyEminus_2	Peptides.csyEminus_3	Peptides.csyEminus_4	Peptides.csyEplus_1	Peptides.csyEplus_2	Peptides.csyEplus_3	Peptides.csyEplus_4	Razor...unique.peptides.csyEminus_1	Razor...unique.peptides.csyEminus_2	Razor...unique.peptides.csyEminus_3	Razor...unique.peptides.csyEminus_4	Razor...unique.peptides.csyEplus_1	Razor...unique.peptides.csyEplus_2	Razor...unique.peptides.csyEplus_3	Razor...unique.peptides.csyEplus_4	Unique.peptides.csyEminus_1	Unique.peptides.csyEminus_2	Unique.peptides.csyEminus_3	Unique.peptides.csyEminus_4	Unique.peptides.csyEplus_1	Unique.peptides.csyEplus_2	Unique.peptides.csyEplus_3	Unique.peptides.csyEplus_4	Sequence.coverage....	Unique...razor.sequence.coverage....	Unique.sequence.coverage....	Mol..weight..kDa.	Sequence.length	Sequence.lengths	Fraction.average	Fraction.1	Q.value	Score	Identification.type.csyEminus_1	Identification.type.csyEminus_2	Identification.type.csyEminus_3	Identification.type.csyEminus_4	Identification.type.csyEplus_1	Identification.type.csyEplus_2
AT1G01080.1;AT1G01080.2	AT1G01080.1;AT1G01080.2	2;2	2;2	2;2	>AT1G01080.1 | Symbols: | RNA-binding (RRM/RBD/RNP motifs) family protein | chr1:45503-46789 REVERSE LENGTH=293;>AT1G01080.2 | Symbols: | RNA-binding (RRM/RBD/RNP motifs) family protein | chr1:45503-46789 REVERSE LENGTH=294	2	2	2	2	1	0	0	0	2	2	2	2	1	0	0	0	2	2	2	2	1	0	0	0	2	2	2	2	10.2	10.2	10.2	32.575	293	293;294	1	9	0	14.405	By matching	By matching	By matching	By matching	By matching	By MS/MS
AT1G02280.2;AT1G02280.1	AT1G02280.2;AT1G02280.1	3;3	3;3	3;3	>AT1G02280.2 | Symbols: TOC33, ATTOC33, PPI1 | translocon at the outer envelope membrane of chloroplasts 33 | chr1:448665-450246 REVERSE LENGTH=297;>AT1G02280.1 | Symbols: TOC33, ATTOC33, PPI1 | translocon at the outer envelope membrane of chloroplasts 33	2	3	3	3	1	0	2	1	3	3	3	3	1	0	2	1	3	3	3	3	1	0	2	1	3	3	3	3	13.1	13.1	13.1	32.925	297	297;297	1	16	0	50.089	By matching	By matching	By matching	By matching	By MS/MS	By MS/MS
AT1G02335.1	AT1G02335.1	4	4	2	>AT1G02335.1 | Symbols: GL22 | germin-like protein subfamily 2 member 2 precursor | chr1:463979-464876 REVERSE LENGTH=219	1	4	4	2	0	1	3	0	4	4	3	3	0	1	3	0	4	4	3	3	0	0	2	0	2	2	2	2	20.5	20.5	10	23.441	219	219	1	20	0	30.408	By matching	By matching	By MS/MS	By matching	By MS/MS	By MS/MS
AT1G03230.1	AT1G03230.1	13	13	10	>AT1G03230.1 | Symbols: | Eukaryotic aspartyl protease family protein | chr1:790110-791414 FORWARD LENGTH=434	1	13	13	10	8	10	13	9	12	12	12	8	8	10	13	9	12	12	12	8	6	7	10	7	9	9	9	6	39.4	39.4	30.4	46.148	434	434	1	84	0	323.31	By MS/MS	By MS/MS	By MS/MS	By MS/MS	By MS/MS	By MS/MS
AT1G03630.2;AT1G03630.1	AT1G03630.2;AT1G03630.1	4;4	4;4	3;3	>AT1G03630.2 | Symbols: POR C, PORC | protochlorophyllide oxidoreductase C | chr1:907699-909245 FORWARD LENGTH=399;>AT1G03630.1 | Symbols: POR C, PORC | protochlorophyllide oxidoreductase C | chr1:907699-909245 FORWARD LENGTH=401	2	4	4	3	1	1	2	1	4	4	4	4	1	1	2	1	4	4	4	4	0	0	1	0	3	3	3	3	9.8	9.8	7.8	43.625	399	399;401	1	23	0	27.182	By matching	By matching	By matching	By matching	By MS/MS	By MS/MS
AT1G04040.1	AT1G04040.1	3	2	2	>AT1G04040.1 | Symbols: | HAD superfamily, subfamily IIIB acid phosphatase | chr1:1042564-1043819 REVERSE LENGTH=271	1	3	2	2	1	2	3	1	3	3	1	2	0	1	2	0	2	2	0	1	0	1	2	0	2	2	0	1	11.1	8.5	8.5	31.096	271	271	1	8	0	13.814	By matching	By matching	By MS/MS	By matching	By MS/MS	By matching
AT1G04170.1;AT4G18330.2;AT4G18330.1;AT2G18720.1	AT1G04170.1	11;3;2;1	11;3;2;1	11;3;2;1	>AT1G04170.1 | Symbols: EIF2 GAMMA | eukaryotic translation initiation factor 2 gamma subunit | chr1:1097423-1099702 FORWARD LENGTH=465	4	11	11	11	0	2	8	1	9	10	10	10	0	2	8	1	9	10	10	10	0	2	8	1	9	10	10	10	31	31	31	50.853	465	465;471;284;470	1	63	0	132.77	By matching	By MS/MS	By MS/MS	By matching	By MS/MS	By MS/MS
AT1G04510.2;AT1G04510.1	AT1G04510.2;AT1G04510.1	3;3	2;2	2;2	>AT1G04510.2 | Symbols: MAC3A | MOS4-associated complex 3A | chr1:1226749-1230592 FORWARD LENGTH=523;>AT1G04510.1 | Symbols: MAC3A | MOS4-associated complex 3A | chr1:1226749-1230592 FORWARD LENGTH=523	2	3	2	2	1	3	2	2	3	3	3	2	1	2	1	1	2	2	2	2	1	2	1	1	2	2	2	2	6.5	4.4	4.4	56.881	523	523;523	1	13	0	12.83	By matching	By matching	By matching	By matching	By MS/MS	By MS/MS
AT4G14960.1;AT4G14960.2;AT1G50010.1;AT1G04820.1;AT5G19780.1;AT5G19770.1	AT4G14960.1;AT4G14960.2;AT1G50010.1;AT1G04820.1;AT5G19780.1;AT5G19770.1	2;2;2;2;1;1	2;2;2;2;1;1	2;2;2;2;1;1	>AT4G14960.1 | Symbols: TUA6 | Tubulin/FtsZ family protein | chr4:8548753-8550319 REVERSE LENGTH=427;>AT4G14960.2 | Symbols: TUA6 | Tubulin/FtsZ family protein | chr4:8548769-8550319 REVERSE LENGTH=450;>AT1G50010.1 | Symbols: TUA2 | tubulin alpha-2 chain |	6	2	2	2	1	1	0	1	2	1	1	2	1	1	0	1	2	1	1	2	1	1	0	1	2	1	1	2	5.2	5.2	5.2	47.235	427	427;450;450;450;450;450	1	9	0	17.169	By matching	By matching	By matching	By matching	By MS/MS	By matching
AT1G06950.1	AT1G06950.1	6	6	6	>AT1G06950.1 | Symbols: ATTIC110, TIC110 | translocon at the inner envelope membrane of chloroplasts 110 | chr1:2130303-2135563 REVERSE LENGTH=1016	1	6	6	6	0	0	2	0	5	6	5	5	0	0	2	0	5	6	5	5	0	0	2	0	5	6	5	5	8.2	8.2	8.2	112.12	1016	1016	1	23	0	38.52	By matching	By matching	By matching	By matching	By MS/MS	By MS/MS
AT5G59970.1;AT5G59690.1;AT3G53730.1;AT3G46320.1;AT3G45930.1;AT2G28740.1;AT1G07820.2;AT1G07820.1;AT1G07660.1;AT1G07660.2	AT5G59970.1;AT5G59690.1;AT3G53730.1;AT3G46320.1;AT3G45930.1;AT2G28740.1;AT1G07820.2;AT1G07820.1;AT1G07660.1;AT1G07660.2	5;5;5;5;5;5;5;5;5;4	5;5;5;5;5;5;5;5;5;4	5;5;5;5;5;5;5;5;5;4	>AT5G59970.1 | Symbols: | Histone superfamily protein | chr5:24146352-24146663 REVERSE LENGTH=103;>AT5G59690.1 | Symbols: | Histone superfamily protein | chr5:24051649-24051960 FORWARD LENGTH=103;>AT3G53730.1 | Symbols: | Histone superfamily protein | c	10	5	5	5	4	2	5	3	5	4	3	5	4	2	5	3	5	4	3	5	4	2	5	3	5	4	3	5	47.6	47.6	47.6	11.409	103	103;103;103;103;103;103;103;103;103;86	1	32	0	30.4	By matching	By matching	By MS/MS	By matching	By MS/MS	By MS/MS
AT5G60390.3;AT5G60390.1;AT1G07940.2;AT1G07940.1;AT1G07930.1;AT1G07920.1;AT5G60390.2;AT1G07930.2;AT1G35550.1	AT5G60390.3;AT5G60390.1;AT1G07940.2;AT1G07940.1;AT1G07930.1;AT1G07920.1;AT5G60390.2;AT1G07930.2	32;32;32;32;32;32;28;25;1	32;32;32;32;32;32;28;25;1	32;32;32;32;32;32;28;25;1	>AT5G60390.3 | Symbols: | GTP binding Elongation factor Tu family protein | chr5:24289226-24290675 FORWARD LENGTH=449;>AT5G60390.1 | Symbols: | GTP binding Elongation factor Tu family protein | chr5:24289226-24290675 FORWARD LENGTH=449;>AT1G07940.2 | Sym	9	32	32	32	22	25	28	22	30	31	30	31	22	25	28	22	30	31	30	31	22	25	28	22	30	31	30	31	59.9	59.9	59.9	49.502	449	449;449;449;449;449;449;400;372;104	1	650	0	323.31	By MS/MS	By MS/MS	By MS/MS	By MS/MS	By MS/MS	By MS/MS
AT1G09340.1	AT1G09340.1	19	19	19	>AT1G09340.1 | Symbols: CRB, CSP41B, HIP1.3 | chloroplast RNA binding | chr1:3015473-3018035 FORWARD LENGTH=378	1	19	19	19	1	7	12	2	17	17	19	17	1	7	12	2	17	17	19	17	1	7	12	2	17	17	19	17	58.7	58.7	58.7	42.619	378	378	1	128	0	323.31	By matching	By MS/MS	By MS/MS	By MS/MS	By MS/MS	By MS/MS
AT1G09750.1	AT1G09750.1	3	3	3	>AT1G09750.1 | Symbols: | Eukaryotic aspartyl protease family protein | chr1:3157541-3158960 FORWARD LENGTH=449	1	3	3	3	3	1	3	0	2	2	2	0	3	1	3	0	2	2	2	0	3	1	3	0	2	2	2	0	7.3	7.3	7.3	47.661	449	449	1	13	0	35.208	By MS/MS	By matching	By MS/MS	By matching	By matching	By matching
AT1G11580.1	AT1G11580.1	7	6	6	>AT1G11580.1 | Symbols: ATPMEPCRA, PMEPCRA | methylesterase PCR A | chr1:3888730-3890649 FORWARD LENGTH=557	1	7	6	6	1	1	4	1	7	7	5	5	0	0	3	0	6	6	4	4	0	0	3	0	6	6	4	4	15.4	14.2	14.2	61.687	557	557	1	23	0	43.857	By matching	By matching	By matching	By matching	By MS/MS	By MS/MS
AT1G12900.4;AT1G12900.3;AT1G12900.1	AT1G12900.4;AT1G12900.3;AT1G12900.1	14;14;14	2;2;2	2;2;2	>AT1G12900.4 | Symbols: GAPA-2 | glyceraldehyde 3-phosphate dehydrogenase A subunit 2 | chr1:4392634-4393850 REVERSE LENGTH=350;>AT1G12900.3 | Symbols: GAPA-2 | glyceraldehyde 3-phosphate dehydrogenase A subunit 2 | chr1:4392634-4393850 REVERSE LENGTH=350;	3	14	2	2	4	7	12	4	13	12	11	12	0	1	2	0	2	2	1	1	0	1	2	0	2	2	1	1	47.7	11.7	11.7	37.667	350	350;350;399	1	9	0	81.038	By matching	By matching	By MS/MS	By matching	By MS/MS	By MS/MS
AT3G04120.1;AT1G13440.1;AT1G13440.2	AT3G04120.1;AT1G13440.1;AT1G13440.2	7;7;6	7;7;6	7;7;6	>AT3G04120.1 | Symbols: GAPC, GAPC-1, GAPC1 | glyceraldehyde-3-phosphate dehydrogenase C subunit 1 | chr3:1081077-1083131 FORWARD LENGTH=338;>AT1G13440.1 | Symbols: GAPC-2, GAPC2 | glyceraldehyde-3-phosphate dehydrogenase C2 | chr1:4608465-4610494 REVERSE	3	7	7	7	1	4	6	4	7	6	7	6	1	4	6	4	7	6	7	6	1	4	6	4	7	6	7	6	31.4	31.4	31.4	36.914	338	338;338;310	1	41	0	319.64	By matching	By MS/MS	By MS/MS	By matching	By MS/MS	By MS/MS
AT1G14410.1	AT1G14410.1	3	3	3	>AT1G14410.1 | Symbols: ATWHY1, PTAC1, WHY1 | ssDNA-binding transcriptional regulator | chr1:4929352-4930810 REVERSE LENGTH=263	1	3	3	3	0	0	0	0	3	3	2	3	0	0	0	0	3	3	2	3	0	0	0	0	3	3	2	3	16	16	16	29.058	263	263	1	11	0	18.811	By matching	By matching	By matching	By matching	By MS/MS	By MS/MS
AT1G15690.2;AT1G15690.1	AT1G15690.2;AT1G15690.1	2;2	2;2	2;2	>AT1G15690.2 | Symbols: AVP1, ATAVP3, AVP-3, AtVHP1;1 | Inorganic H pyrophosphatase family protein | chr1:5399115-5402185 FORWARD LENGTH=642;>AT1G15690.1 | Symbols: AVP1, ATAVP3, AVP-3, AtVHP1;1 | Inorganic H pyrophosphatase family protein | chr1:5399115-5	2	2	2	2	2	0	2	0	2	2	1	2	2	0	2	0	2	2	1	2	2	0	2	0	2	2	1	2	4.2	4.2	4.2	67.706	642	642;770	1	11	0	11.788	By matching	By matching	By MS/MS	By matching	By matching	By matching
AT1G15820.1	AT1G15820.1	5	5	5	>AT1G15820.1 | Symbols: LHCB6, CP24 | light harvesting complex photosystem II subunit 6 | chr1:5446685-5447676 REVERSE LENGTH=258	1	5	5	5	3	2	4	2	4	5	4	4	3	2	4	2	4	5	4	4	3	2	4	2	4	5	4	4	26.7	26.7	26.7	27.522	258	258	1	37	0	109.07	By matching	By matching	By MS/MS	By matching	By MS/MS	By MS/MS
AT1G16030.1	AT1G16030.1	5	3	2	>AT1G16030.1 | Symbols: Hsp70b | heat shock protein 70B | chr1:5502386-5504326 REVERSE LENGTH=646	1	5	3	2	4	4	3	3	4	3	4	5	2	2	1	1	2	1	2	3	2	2	0	0	1	0	1	2	9	6.3	3.9	70.914	646	646	1	15	0	23.778	By MS/MS	By matching	By matching	By matching	By MS/MS	By MS/MS
AT1G18080.1	AT1G18080.1	3	3	3	>AT1G18080.1 | Symbols: ATARCA, RACK1A_AT, RACK1A | Transducin/WD40 repeat-like superfamily protein | chr1:6222325-6223901 FORWARD LENGTH=327	1	3	3	3	0	0	0	0	3	3	2	2	0	0	0	0	3	3	2	2	0	0	0	0	3	3	2	2	15.6	15.6	15.6	35.747	327	327	1	10	0	18.222	By matching	By matching	By matching	By matching	By MS/MS	By MS/MS
AT1G20020.2;AT1G20020.3;AT1G20020.1	AT1G20020.2;AT1G20020.3;AT1G20020.1	7;7;7	6;6;6	6;6;6	>AT1G20020.2 | Symbols: ATLFNR2 | ferredoxin-NADP(+)-oxidoreductase 2 | chr1:6942851-6944868 FORWARD LENGTH=350;>AT1G20020.3 | Symbols: ATLFNR2 | ferredoxin-NADP(+)-oxidoreductase 2 | chr1:6942851-6944868 FORWARD LENGTH=369;>AT1G20020.1 | Symbols: ATLFNR2,	3	7	6	6	7	4	6	5	6	6	4	4	6	3	5	4	5	5	3	3	6	3	5	4	5	5	3	3	26.3	23.1	23.1	39.233	350	350;369;369	1	35	0	165.71	By MS/MS	By MS/MS	By MS/MS	By MS/MS	By MS/MS	By MS/MS
AT1G20190.1	AT1G20190.1	4	4	4	>AT1G20190.1 | Symbols: ATEXPA11, EXP11, ATEXP11, ATHEXP ALPHA 1.14, EXPA11 | expansin 11 | chr1:6998762-6999710 REVERSE LENGTH=252	1	4	4	4	4	3	4	4	4	4	4	4	4	3	4	4	4	4	4	4	4	3	4	4	4	4	4	4	19.4	19.4	19.4	26.761	252	252	1	49	0	135.37	By MS/MS	By MS/MS	By MS/MS	By MS/MS	By MS/MS	By MS/MS
AT1G76030.1;AT1G20260.1;AT4G38510.4;AT4G38510.3;AT4G38510.2;AT4G38510.1;AT4G38510.5	AT1G76030.1;AT1G20260.1;AT4G38510.4;AT4G38510.3;AT4G38510.2;AT4G38510.1;AT4G38510.5	3;3;2;2;2;2;2	3;3;2;2;2;2;2	3;3;2;2;2;2;2	>AT1G76030.1 | Symbols: | ATPase, V1 complex, subunit B protein | chr1:28534134-28536916 FORWARD LENGTH=486;>AT1G20260.1 | Symbols: | ATPase, V1 complex, subunit B protein | chr1:7016971-7020290 FORWARD LENGTH=487;>AT4G38510.4 | Symbols: | ATPase, V1 co	7	3	3	3	1	1	2	0	2	2	2	2	1	1	2	0	2	2	2	2	1	1	2	0	2	2	2	2	9.1	9.1	9.1	54.107	486	486;487;487;487;487;487;494	1	12	0	60.332	By matching	By matching	By MS/MS	By matching	By MS/MS	By MS/MS
AT1G20960.2;AT1G20960.1;AT2G42270.1	AT1G20960.2;AT1G20960.1	4;4;1	4;4;1	4;4;1	>AT1G20960.2 | Symbols: emb1507 | U5 small nuclear ribonucleoprotein helicase, putative | chr1:7302591-7309914 REVERSE LENGTH=2171;>AT1G20960.1 | Symbols: emb1507 | U5 small nuclear ribonucleoprotein helicase, putative | chr1:7302591-7309914 REVERSE LENGTH	3	4	4	4	0	0	1	0	4	4	3	2	0	0	1	0	4	4	3	2	0	0	1	0	4	4	3	2	2.5	2.5	2.5	247.1	2171	2171;2171;2172	1	14	0	23.435	By matching	By matching	By matching	By matching	By MS/MS	By MS/MS
AT3G52590.1;AT2G36170.1;AT4G05050.4;AT2G35635.1;AT1G31340.1;AT1G23410.1;AT3G62250.1;AT2G47110.2;AT2G47110.1;AT4G05050.3;AT4G05050.2;AT4G05050.1;AT4G02890.2;AT4G02890.1;AT1G55060.1;AT4G05320.5;AT4G02890.4;AT4G02890.3;AT5G03240.3;AT5G03240.2;AT5G03240.1;AT1G65350.1;AT5G37640.1;AT4G05320.6;AT4G05320.3;AT4G05320.1;AT5G20620.1;AT4G05320.4;AT4G05320.2;AT3G09790.1	AT3G52590.1;AT2G36170.1;AT4G05050.4;AT2G35635.1;AT1G31340.1;AT1G23410.1;AT3G62250.1;AT2G47110.2;AT2G47110.1;AT4G05050.3;AT4G05050.2;AT4G05050.1;AT4G02890.2;AT4G02890.1;AT1G55060.1;AT4G05320.5;AT4G02890.4;AT4G02890.3;AT5G03240.3;AT5G03240.2;AT5G03240.1;AT1G65350.1;AT5G37640.1;AT4G05320.6;AT4G05320.3;AT4G05320.1;AT5G20620.1;AT4G05320.4;AT4G05320.2;AT3G09790.1	2;2;2;2;2;2;2;2;2;2;2;2;2;2;2;2;2;2;2;2;2;2;2;2;2;2;2;2;2;2	2;2;2;2;2;2;2;2;2;2;2;2;2;2;2;2;2;2;2;2;2;2;2;2;2;2;2;2;2;2	2;2;2;2;2;2;2;2;2;2;2;2;2;2;2;2;2;2;2;2;2;2;2;2;2;2;2;2;2;2	>AT3G52590.1 | Symbols: UBQ1, EMB2167, ERD16, HAP4 | ubiquitin extension protein 1 | chr3:19505668-19506681 FORWARD LENGTH=128;>AT2G36170.1 | Symbols: | Ubiquitin supergroup;Ribosomal protein L40e | chr2:15172153-15173046 FORWARD LENGTH=128;>AT4G05050.4 |	30	2	2	2	1	2	2	2	2	2	2	2	1	2	2	2	2	2	2	2	1	2	2	2	2	2	2	2	19.5	19.5	19.5	14.733	128	128;128;153;154;156;156;157;157;157;229;229;229;229;229;230;305;305;305;306;306;306;319;322;381;381;381;382;457;457;631	1	21	0	74.094	By MS/MS	By MS/MS	By MS/MS	By MS/MS	By MS/MS	By MS/MS
AT1G24360.1	AT1G24360.1	12	12	12	>AT1G24360.1 | Symbols: | NAD(P)-binding Rossmann-fold superfamily protein | chr1:8640820-8643283 FORWARD LENGTH=319	1	12	12	12	4	8	10	6	10	11	9	9	4	8	10	6	10	11	9	9	4	8	10	6	10	11	9	9	56.1	56.1	56.1	33.548	319	319	1	103	0	323.31	By MS/MS	By MS/MS	By MS/MS	By MS/MS	By MS/MS	By MS/MS
AT1G28290.2;AT1G28290.1	AT1G28290.2;AT1G28290.1	4;4	4;4	4;4	>AT1G28290.2 | Symbols: AGP31 | arabinogalactan protein 31 | chr1:9889331-9890843 REVERSE LENGTH=315;>AT1G28290.1 | Symbols: AGP31 | arabinogalactan protein 31 | chr1:9889331-9890843 REVERSE LENGTH=359	2	4	4	4	0	3	4	1	3	3	2	4	0	3	4	1	3	3	2	4	0	3	4	1	3	3	2	4	13	13	13	33.932	315	315;359	1	20	0	27.152	By matching	By matching	By MS/MS	By matching	By MS/MS	By MS/MS
AT1G30360.1	AT1G30360.1	3	3	3	>AT1G30360.1 | Symbols: ERD4 | Early-responsive to dehydration stress protein (ERD4) | chr1:10715892-10718799 FORWARD LENGTH=724	1	3	3	3	1	0	3	1	3	3	3	2	1	0	3	1	3	3	3	2	1	0	3	1	3	3	3	2	6.5	6.5	6.5	81.934	724	724	1	16	0	42.141	By matching	By matching	By MS/MS	By matching	By MS/MS	By MS/MS
AT1G31330.1	AT1G31330.1	4	4	4	>AT1G31330.1 | Symbols: PSAF | photosystem I subunit F | chr1:11215011-11215939 REVERSE LENGTH=221	1	4	4	4	2	3	4	2	3	3	3	2	2	3	4	2	3	3	3	2	2	3	4	2	3	3	3	2	22.2	22.2	22.2	24.173	221	221	1	34	0	104.94	By matching	By MS/MS	By MS/MS	By MS/MS	By MS/MS	By MS/MS
AT1G31690.1	AT1G31690.1	3	3	3	>AT1G31690.1 | Symbols: | Copper amine oxidase family protein | chr1:11343980-11347767 FORWARD LENGTH=677	1	3	3	3	0	0	3	0	3	3	2	3	0	0	3	0	3	3	2	3	0	0	3	0	3	3	2	3	5.3	5.3	5.3	76.673	677	677	1	14	0	19.22	By matching	By matching	By MS/MS	By matching	By MS/MS	By MS/MS
AT1G32060.1	AT1G32060.1	12	12	12	>AT1G32060.1 | Symbols: PRK | phosphoribulokinase | chr1:11532668-11534406 FORWARD LENGTH=395	1	12	12	12	10	8	12	8	10	10	7	9	10	8	12	8	10	10	7	9	10	8	12	8	10	10	7	9	40	40	40	44.463	395	395	1	111	0	195.68	By MS/MS	By MS/MS	By MS/MS	By MS/MS	By MS/MS	By MS/MS
AT1G32900.1	AT1G32900.1	5	5	5	>AT1G32900.1 | Symbols: | UDP-Glycosyltransferase superfamily protein | chr1:11920582-11923506 REVERSE LENGTH=610	1	5	5	5	0	2	5	0	2	0	0	0	0	2	5	0	2	0	0	0	0	2	5	0	2	0	0	0	13	13	13	66.879	610	610	1	10	0	55.24	By matching	By matching	By MS/MS	By matching	By matching	By matching
AT1G32990.1	AT1G32990.1	2	2	2	>AT1G32990.1 | Symbols: PRPL11 | plastid ribosomal protein l11 | chr1:11955827-11957139 FORWARD LENGTH=222	1	2	2	2	2	2	1	2	2	2	2	2	2	2	1	2	2	2	2	2	2	2	1	2	2	2	2	2	10.8	10.8	10.8	23.148	222	222	1	15	0	13.012	By matching	By matching	By matching	By matching	By MS/MS	By MS/MS
AT1G33590.1;AT1G33612.1	AT1G33590.1	13;1	13;1	12;1	>AT1G33590.1 | Symbols: | Leucine-rich repeat (LRR) family protein | chr1:12177788-12179221 FORWARD LENGTH=477	2	13	13	12	4	9	11	4	12	11	10	7	4	9	11	4	12	11	10	7	4	9	10	4	11	10	10	7	41.5	41.5	37.1	51.741	477	477;455	1	86	0	323.31	By MS/MS	By MS/MS	By MS/MS	By matching	By MS/MS	By MS/MS
AT1G33600.1	AT1G33600.1	10	9	9	>AT1G33600.1 | Symbols: | Leucine-rich repeat (LRR) family protein | chr1:12180776-12182212 FORWARD LENGTH=478	1	10	9	9	2	3	9	1	9	10	8	7	2	3	8	1	8	9	8	7	2	3	8	1	8	9	8	7	26.2	21.8	21.8	52.47	478	478	1	46	0	103.16	By matching	By MS/MS	By MS/MS	By matching	By MS/MS	By MS/MS
AT1G33811.1	AT1G33811.1	8	8	8	>AT1G33811.1 | Symbols: | GDSL-like Lipase/Acylhydrolase superfamily protein | chr1:12267918-12269690 FORWARD LENGTH=370	1	8	8	8	1	3	8	1	8	6	5	4	1	3	8	1	8	6	5	4	1	3	8	1	8	6	5	4	26.2	26.2	26.2	41.697	370	370	1	36	0	70.49	By matching	By MS/MS	By MS/MS	By matching	By MS/MS	By MS/MS
AT1G41830.1	AT1G41830.1	12	12	8	>AT1G41830.1 | Symbols: SKS6 | SKU5-similar 6 | chr1:15603892-15607802 REVERSE LENGTH=542	1	12	12	8	7	9	10	6	11	11	8	9	7	9	10	6	11	11	8	9	4	6	7	3	7	7	5	6	32.7	32.7	23.8	60.577	542	542	1	77	0	323.31	By MS/MS	By MS/MS	By MS/MS	By matching	By MS/MS	By MS/MS
AT1G42970.1	AT1G42970.1	14	11	11	>AT1G42970.1 | Symbols: GAPB | glyceraldehyde-3-phosphate dehydrogenase B subunit | chr1:16127552-16129584 FORWARD LENGTH=447	1	14	11	11	2	2	11	2	12	11	11	12	0	1	9	0	10	9	9	9	0	1	9	0	10	9	9	9	36.5	28.2	28.2	47.659	447	447	1	53	0	230.19	By matching	By matching	By MS/MS	By matching	By MS/MS	By MS/MS
AT1G44575.1;AT1G44575.2	AT1G44575.1;AT1G44575.2	7;6	7;6	7;6	>AT1G44575.1 | Symbols: NPQ4, PSBS | Chlorophyll A-B binding family protein | chr1:16871768-16873194 FORWARD LENGTH=265;>AT1G44575.2 | Symbols: NPQ4, PSBS | Chlorophyll A-B binding family protein | chr1:16871768-16872548 FORWARD LENGTH=205	2	7	7	7	7	7	7	6	6	6	7	7	7	7	7	6	6	6	7	7	7	7	7	6	6	6	7	7	31.3	31.3	31.3	28.007	265	265;205	1	80	0	323.31	By MS/MS	By MS/MS	By MS/MS	By MS/MS	By MS/MS	By MS/MS
AT1G48410.1;AT1G48410.3;AT1G48410.2	AT1G48410.1;AT1G48410.3;AT1G48410.2	6;6;6	6;6;6	6;6;6	>AT1G48410.1 | Symbols: AGO1 | Stabilizer of iron transporter SufD / Polynucleotidyl transferase | chr1:17886285-17891892 REVERSE LENGTH=1048;>AT1G48410.3 | Symbols: AGO1 | Stabilizer of iron transporter SufD / Polynucleotidyl transferase | chr1:17886285-1	3	6	6	6	1	0	5	0	5	5	5	6	1	0	5	0	5	5	5	6	1	0	5	0	5	5	5	6	6.2	6.2	6.2	116.19	1048	1048;1050;1050	1	27	0	37.182	By matching	By matching	By matching	By matching	By MS/MS	By MS/MS
AT1G48920.1	AT1G48920.1	3	3	3	>AT1G48920.1 | Symbols: ATNUC-L1, PARL1, NUC-L1 | nucleolin like 1 | chr1:18098186-18101422 FORWARD LENGTH=557	1	3	3	3	0	0	2	0	3	3	3	3	0	0	2	0	3	3	3	3	0	0	2	0	3	3	3	3	6.6	6.6	6.6	58.773	557	557	1	14	0	18.828	By matching	By matching	By matching	By matching	By MS/MS	By MS/MS
AT1G49750.1	AT1G49750.1	5	5	5	>AT1G49750.1 | Symbols: | Leucine-rich repeat (LRR) family protein | chr1:18411177-18412779 REVERSE LENGTH=494	1	5	5	5	1	2	4	1	4	3	2	3	1	2	4	1	4	3	2	3	1	2	4	1	4	3	2	3	12.1	12.1	12.1	54.407	494	494	1	20	0	34.342	By matching	By MS/MS	By MS/MS	By matching	By MS/MS	By MS/MS
AT1G52400.2;AT1G52400.3;AT1G52400.1	AT1G52400.2;AT1G52400.3;AT1G52400.1	3;3;3	2;2;2	2;2;2	>AT1G52400.2 | Symbols: BGL1, BGLU18, ATBG1 | beta glucosidase 18 | chr1:19515250-19517646 FORWARD LENGTH=461;>AT1G52400.3 | Symbols: BGLU18 | beta glucosidase 18 | chr1:19515250-19517930 FORWARD LENGTH=528;>AT1G52400.1 | Symbols: BGL1, BGLU18, ATBG1 | bet	3	3	2	2	0	0	2	0	3	3	2	3	0	0	1	0	2	2	1	2	0	0	1	0	2	2	1	2	10.4	8.5	8.5	52.37	461	461;528;528	1	8	0	23.349	By matching	By matching	By matching	By matching	By MS/MS	By MS/MS
AT1G54010.1;AT1G54000.1	AT1G54010.1	8;1	8;1	8;1	>AT1G54010.1 | Symbols: | GDSL-like Lipase/Acylhydrolase superfamily protein | chr1:20158854-20160747 REVERSE LENGTH=386	2	8	8	8	6	4	8	5	7	8	2	5	6	4	8	5	7	8	2	5	6	4	8	5	7	8	2	5	31.6	31.6	31.6	43.143	386	386;391	1	48	0	119.57	By MS/MS	By matching	By MS/MS	By MS/MS	By MS/MS	By MS/MS
AT1G54780.1	AT1G54780.1	6	6	6	>AT1G54780.1 | Symbols: TLP18.3 | thylakoid lumen 18.3 kDa protein | chr1:20439533-20440953 FORWARD LENGTH=285	1	6	6	6	6	5	4	5	6	6	6	6	6	5	4	5	6	6	6	6	6	5	4	5	6	6	6	6	24.9	24.9	24.9	31.138	285	285	1	44	0	62.372	By matching	By MS/MS	By MS/MS	By MS/MS	By MS/MS	By MS/MS
AT1G55210.2;AT1G55210.1;AT3G13660.1	AT1G55210.2;AT1G55210.1;AT3G13660.1	2;2;1	2;2;1	2;2;1	>AT1G55210.2 | Symbols: | Disease resistance-responsive (dirigent-like protein) family protein | chr1:20598057-20598620 REVERSE LENGTH=187;>AT1G55210.1 | Symbols: | Disease resistance-responsive (dirigent-like protein) family protein | chr1:20598057-2059	3	2	2	2	0	0	0	0	2	2	2	2	0	0	0	0	2	2	2	2	0	0	0	0	2	2	2	2	13.4	13.4	13.4	20.618	187	187;187;125	1	11	0	16.322	By matching	By matching	By matching	By matching	By MS/MS	By MS/MS
AT3G13470.1;AT1G55490.2;AT1G55490.1;AT5G56500.2;AT5G56500.1	AT3G13470.1;AT1G55490.2;AT1G55490.1;AT5G56500.2;AT5G56500.1	6;6;6;4;4	6;6;6;4;4	6;6;6;4;4	>AT3G13470.1 | Symbols: | TCP-1/cpn60 chaperonin family protein | chr3:4389685-4392624 FORWARD LENGTH=596;>AT1G55490.2 | Symbols: CPN60B, LEN1 | chaperonin 60 beta | chr1:20715717-20718673 REVERSE LENGTH=600;>AT1G55490.1 | Symbols: CPN60B, LEN1 | chaperon	5	6	6	6	0	1	5	0	5	4	2	2	0	1	5	0	5	4	2	2	0	1	5	0	5	4	2	2	13.3	13.3	13.3	63.341	596	596;600;600;597;597	1	19	0	37.726	By matching	By matching	By MS/MS	By matching	By MS/MS	By MS/MS
AT1G58270.1	AT1G58270.1	2	2	2	>AT1G58270.1 | Symbols: ZW9 | TRAF-like family protein | chr1:21612394-21614089 REVERSE LENGTH=396	1	2	2	2	1	1	2	1	2	2	0	1	1	1	2	1	2	2	0	1	1	1	2	1	2	2	0	1	7.8	7.8	7.8	45.035	396	396	1	10	0	13.168	By matching	By MS/MS	By MS/MS	By matching	By MS/MS	By MS/MS
AT1G65590.1	AT1G65590.1	8	8	8	>AT1G65590.1 | Symbols: HEXO3, ATHEX1 | beta-hexosaminidase 3 | chr1:24385996-24390989 FORWARD LENGTH=535	1	8	8	8	1	4	4	1	8	8	7	7	1	4	4	1	8	8	7	7	1	4	4	1	8	8	7	7	19.4	19.4	19.4	60.013	535	535	1	41	0	61.342	By matching	By matching	By MS/MS	By matching	By MS/MS	By MS/MS
AT1G65870.1	AT1G65870.1	4	4	4	>AT1G65870.1 | Symbols: | Disease resistance-responsive (dirigent-like protein) family protein | chr1:24503624-24504193 FORWARD LENGTH=189	1	4	4	4	0	0	1	0	2	4	2	2	0	0	1	0	2	4	2	2	0	0	1	0	2	4	2	2	26.5	26.5	26.5	20.395	189	189	1	14	0	50.722	By matching	By matching	By matching	By matching	By MS/MS	By MS/MS
AT1G67090.1;AT1G67090.2	AT1G67090.1	5;2	5;2	4;2	>AT1G67090.1 | Symbols: RBCS1A | ribulose bisphosphate carboxylase small chain 1A | chr1:25048465-25049249 REVERSE LENGTH=180	2	5	5	4	4	3	5	4	4	5	3	4	4	3	5	4	4	5	3	4	3	2	4	3	3	4	2	3	28.9	28.9	21.1	20.216	180	180;136	1	35	0	173.11	By MS/MS	By MS/MS	By MS/MS	By MS/MS	By MS/MS	By MS/MS
AT1G67700.3;AT1G67700.1;AT1G67700.2	AT1G67700.3;AT1G67700.1;AT1G67700.2	2;2;2	2;2;2	2;2;2	>AT1G67700.3 | Symbols: | unknown protein; FUNCTIONS IN: molecular_function unknown; INVOLVED IN: biological_process unknown; EXPRESSED IN: 22 plant structures; EXPRESSED DURING: 13 growth stages. | chr1:25374295-25375716 FORWARD LENGTH=229;>AT1G67700.1 |	3	2	2	2	0	1	2	0	2	2	2	1	0	1	2	0	2	2	2	1	0	1	2	0	2	2	2	1	12.7	12.7	12.7	25.911	229	229;230;231	1	10	0	109.29	By matching	By matching	By MS/MS	By matching	By MS/MS	By MS/MS
AT1G68560.1;AT3G45940.1	AT1G68560.1	28;4	28;4	28;4	>AT1G68560.1 | Symbols: ATXYL1, XYL1, TRG1 | alpha-xylosidase 1 | chr1:25734435-25737897 REVERSE LENGTH=915	2	28	28	28	12	18	22	10	27	26	22	20	12	18	22	10	27	26	22	20	12	18	22	10	27	26	22	20	48	48	48	102.4	915	915;868	1	207	0	323.31	By matching	By MS/MS	By MS/MS	By MS/MS	By MS/MS	By MS/MS
AT1G69530.2;AT1G69530.1;AT1G69530.5;AT1G69530.4;AT1G69530.3	AT1G69530.2;AT1G69530.1;AT1G69530.5;AT1G69530.4;AT1G69530.3	2;2;1;1;1	2;2;1;1;1	2;2;1;1;1	>AT1G69530.2 | Symbols: ATEXPA1, EXP1, AT-EXP1, ATEXP1, ATHEXP ALPHA 1.2, EXPA1 | expansin A1 | chr1:26142034-26143051 FORWARD LENGTH=250;>AT1G69530.1 | Symbols: ATEXPA1, EXP1, AT-EXP1, ATEXP1, ATHEXP ALPHA 1.2, EXPA1 | expansin A1 | chr1:26142034-26143051	5	2	2	2	0	0	1	0	2	2	1	1	0	0	1	0	2	2	1	1	0	0	1	0	2	2	1	1	15.6	15.6	15.6	26.517	250	250;250;245;274;275	1	7	0	66.298	By matching	By matching	By MS/MS	By matching	By MS/MS	By MS/MS
AT1G71695.1	AT1G71695.1	3	3	3	>AT1G71695.1 | Symbols: | Peroxidase superfamily protein | chr1:26964359-26966557 FORWARD LENGTH=358	1	3	3	3	0	2	3	0	2	2	1	0	0	2	3	0	2	2	1	0	0	2	3	0	2	2	1	0	10.1	10.1	10.1	39.559	358	358	1	10	0	18.185	By matching	By matching	By MS/MS	By matching	By MS/MS	By matching
AT1G72150.1;AT1G22530.1	AT1G72150.1	13;2	13;2	13;2	>AT1G72150.1 | Symbols: PATL1 | PATELLIN 1 | chr1:27148558-27150652 FORWARD LENGTH=573	2	13	13	13	5	4	9	5	13	11	11	13	5	4	9	5	13	11	11	13	5	4	9	5	13	11	11	13	29.1	29.1	29.1	64.046	573	573;683	1	71	0	85.937	By matching	By matching	By matching	By matching	By MS/MS	By MS/MS
AT1G72610.1	AT1G72610.1	6	6	6	>AT1G72610.1 | Symbols: GLP1, ATGER1, GER1 | germin-like protein 1 | chr1:27339302-27339928 REVERSE LENGTH=208	1	6	6	6	1	3	4	3	6	5	5	5	1	3	4	3	6	5	5	5	1	3	4	3	6	5	5	5	12.5	12.5	12.5	21.559	208	208	1	41	0	59.249	By matching	By MS/MS	By MS/MS	By matching	By MS/MS	By MS/MS
AT1G72970.2;AT1G72970.1;AT5G51950.2;AT5G51930.1;AT5G51950.1	AT1G72970.2;AT1G72970.1;AT5G51950.2;AT5G51930.1;AT5G51950.1	2;2;1;1;1	2;2;1;1;1	2;2;1;1;1	>AT1G72970.2 | Symbols: HTH, EDA17 | Glucose-methanol-choline (GMC) oxidoreductase family protein | chr1:27452872-27455706 FORWARD LENGTH=567;>AT1G72970.1 | Symbols: HTH, EDA17 | Glucose-methanol-choline (GMC) oxidoreductase family protein | chr1:27452872-	5	2	2	2	0	1	2	0	2	2	1	1	0	1	2	0	2	2	1	1	0	1	2	0	2	2	1	1	4.1	4.1	4.1	62.209	567	567;594;553;582;586	1	9	0	43.335	By matching	By matching	By MS/MS	By matching	By matching	By matching
AT1G74000.1	AT1G74000.1	4	4	4	>AT1G74000.1 | Symbols: SS3 | strictosidine synthase 3 | chr1:27829266-27831401 REVERSE LENGTH=329	1	4	4	4	0	2	4	0	4	3	3	3	0	2	4	0	4	3	3	3	0	2	4	0	4	3	3	3	19.8	19.8	19.8	34.666	329	329	1	19	0	41.341	By matching	By matching	By MS/MS	By matching	By MS/MS	By MS/MS
AT1G76160.1;AT1G21860.1	AT1G76160.1	9;1	6;0	6;0	>AT1G76160.1 | Symbols: sks5 | SKU5 similar 5 | chr1:28578211-28581020 REVERSE LENGTH=541	2	9	6	6	7	5	8	7	7	6	3	3	5	3	6	5	4	3	1	1	5	3	6	5	4	3	1	1	22.4	16.5	16.5	60.04	541	541;538	1	28	0	60.546	By MS/MS	By MS/MS	By MS/MS	By MS/MS	By matching	By matching
AT1G77510.1;AT1G21750.2;AT1G21750.1	AT1G77510.1	3;1;1	3;1;1	3;1;1	>AT1G77510.1 | Symbols: ATPDIL1-2, PDI6, ATPDI6, PDIL1-2 | PDI-like 1-2 | chr1:29126742-29129433 FORWARD LENGTH=508	3	3	3	3	0	2	1	2	2	2	3	3	0	2	1	2	2	2	3	3	0	2	1	2	2	2	3	3	7.7	7.7	7.7	56.364	508	508;487;501	1	15	0	39.025	By matching	By MS/MS	By matching	By matching	By MS/MS	By MS/MS
AT1G78060.1	AT1G78060.1	10	10	10	>AT1G78060.1 | Symbols: | Glycosyl hydrolase family protein | chr1:29349796-29352868 REVERSE LENGTH=767	1	10	10	10	4	5	5	3	8	10	8	9	4	5	5	3	8	10	8	9	4	5	5	3	8	10	8	9	18.5	18.5	18.5	83.891	767	767	1	58	0	92.427	By matching	By matching	By MS/MS	By matching	By MS/MS	By MS/MS
AT1G78820.1	AT1G78820.1	6	3	3	>AT1G78820.1 | Symbols: | D-mannose binding lectin protein with Apple-like carbohydrate-binding domain | chr1:29634401-29635768 REVERSE LENGTH=455	1	6	3	3	5	4	6	6	5	5	5	5	2	2	3	3	3	3	2	2	2	2	3	3	3	3	2	2	19.8	10.5	10.5	50.594	455	455	1	20	0	37.416	By MS/MS	By MS/MS	By MS/MS	By MS/MS	By MS/MS	By MS/MS
AT1G78830.1	AT1G78830.1	11	11	8	>AT1G78830.1 | Symbols: | Curculin-like (mannose-binding) lectin family protein | chr1:29637141-29638508 REVERSE LENGTH=455	1	11	11	8	11	8	11	10	9	10	11	11	11	8	11	10	9	10	11	11	8	6	8	7	7	8	8	8	33.4	33.4	24.2	50.342	455	455	1	93	0	314.64	By MS/MS	By MS/MS	By MS/MS	By MS/MS	By MS/MS	By MS/MS
AT1G78850.1;AT1G78860.1	AT1G78850.1	13;6	13;6	13;6	>AT1G78850.1 | Symbols: | D-mannose binding lectin protein with Apple-like carbohydrate-binding domain | chr1:29642072-29643397 REVERSE LENGTH=441	2	13	13	13	12	12	11	10	13	13	12	13	12	12	11	10	13	13	12	13	12	12	11	10	13	13	12	13	31.7	31.7	31.7	49.051	441	441;443	1	123	0	323.31	By MS/MS	By MS/MS	By MS/MS	By MS/MS	By MS/MS	By MS/MS
AT1G78900.2;AT1G78900.1	AT1G78900.2;AT1G78900.1	6;6	6;6	6;6	>AT1G78900.2 | Symbols: VHA-A | vacuolar ATP synthase subunit A | chr1:29660463-29664575 FORWARD LENGTH=623;>AT1G78900.1 | Symbols: VHA-A | vacuolar ATP synthase subunit A | chr1:29660463-29664575 FORWARD LENGTH=623	2	6	6	6	0	2	4	0	6	6	6	6	0	2	4	0	6	6	6	6	0	2	4	0	6	6	6	6	13	13	13	68.812	623	623;623	1	36	0	45.763	By matching	By matching	By MS/MS	By matching	By MS/MS	By MS/MS
AT1G78920.2;AT1G78920.1;AT1G16780.1	AT1G78920.2;AT1G78920.1;AT1G16780.1	2;2;1	2;2;1	2;2;1	>AT1G78920.2 | Symbols: AVP2, AVPL1, AtVHP2;1, VHP2;1, VP2 | vacuolar H+-pyrophosphatase 2 | chr1:29672340-29676761 FORWARD LENGTH=802;>AT1G78920.1 | Symbols: AVP2, AVPL1, AtVHP2;1, VHP2;1, VP2 | vacuolar H+-pyrophosphatase 2 | chr1:29672340-29676761 FORWA	3	2	2	2	2	0	2	1	1	1	0	1	2	0	2	1	1	1	0	1	2	0	2	1	1	1	0	1	3	3	3	85.132	802	802;802;851	1	8	0	11.289	By matching	By matching	By MS/MS	By matching	By MS/MS	By matching
AT2G01140.1	AT2G01140.1	5	4	4	>AT2G01140.1 | Symbols: | Aldolase superfamily protein | chr2:95006-96491 REVERSE LENGTH=391	1	5	4	4	3	2	2	1	4	4	5	3	2	1	1	0	3	3	4	2	2	1	1	0	3	3	4	2	16.9	14.6	14.6	42.327	391	391	1	16	0	28.266	By matching	By matching	By matching	By matching	By MS/MS	By MS/MS
AT2G02740.2;AT2G02740.1	AT2G02740.2;AT2G02740.1	4;4	4;4	4;4	>AT2G02740.2 | Symbols: ATWHY3, PTAC11, WHY3 | ssDNA-binding transcriptional regulator | chr2:769389-770993 FORWARD LENGTH=267;>AT2G02740.1 | Symbols: ATWHY3, PTAC11, WHY3 | ssDNA-binding transcriptional regulator | chr2:769389-770993 FORWARD LENGTH=268	2	4	4	4	0	0	0	0	2	3	3	3	0	0	0	0	2	3	3	3	0	0	0	0	2	3	3	3	17.2	17.2	17.2	29.64	267	267;268	1	11	0	25.093	By matching	By matching	By matching	By matching	By MS/MS	By MS/MS
AT2G03980.1	AT2G03980.1	2	2	2	>AT2G03980.1 | Symbols: | GDSL-like Lipase/Acylhydrolase superfamily protein | chr2:1260907-1262408 FORWARD LENGTH=367	1	2	2	2	0	0	0	0	2	2	2	2	0	0	0	0	2	2	2	2	0	0	0	0	2	2	2	2	5.4	5.4	5.4	40.757	367	367	1	9	0	13.009	By matching	By matching	By matching	By matching	By MS/MS	By MS/MS
AT2G05380.1;AT2G05380.2	AT2G05380.1;AT2G05380.2	2;1	2;1	2;1	>AT2G05380.1 | Symbols: GRP3S | glycine-rich protein 3 short isoform | chr2:1966851-1967820 FORWARD LENGTH=116;>AT2G05380.2 | Symbols: GRP3S | glycine-rich protein 3 short isoform | chr2:1966851-1967820 FORWARD LENGTH=102	2	2	2	2	0	1	2	0	2	2	2	2	0	1	2	0	2	2	2	2	0	1	2	0	2	2	2	2	25.9	25.9	25.9	11.586	116	116;102	1	11	0	22.731	By matching	By matching	By MS/MS	By matching	By MS/MS	By MS/MS
AT2G05920.1	AT2G05920.1	12	12	12	>AT2G05920.1 | Symbols: | Subtilase family protein | chr2:2269831-2272207 REVERSE LENGTH=754	1	12	12	12	0	5	12	1	11	9	9	6	0	5	12	1	11	9	9	6	0	5	12	1	11	9	9	6	25.5	25.5	25.5	80.014	754	754	1	60	0	297.88	By matching	By MS/MS	By MS/MS	By matching	By MS/MS	By MS/MS
AT2G06850.1;AT5G13870.1	AT2G06850.1	14;3	14;3	14;3	>AT2G06850.1 | Symbols: EXGT-A1, EXT, XTH4 | xyloglucan endotransglucosylase/hydrolase 4 | chr2:2763619-2765490 FORWARD LENGTH=296	2	14	14	14	3	8	13	4	13	13	13	12	3	8	13	4	13	13	13	12	3	8	13	4	13	13	13	12	48.6	48.6	48.6	34.291	296	296;293	1	99	0	251.86	By MS/MS	By MS/MS	By MS/MS	By MS/MS	By MS/MS	By MS/MS
AT2G10940.2;AT2G10940.1	AT2G10940.2;AT2G10940.1	2;2	2;2	2;2	>AT2G10940.2 | Symbols: | Bifunctional inhibitor/lipid-transfer protein/seed storage 2S albumin superfamily protein | chr2:4311160-4312035 REVERSE LENGTH=291;>AT2G10940.1 | Symbols: | Bifunctional inhibitor/lipid-transfer protein/seed storage 2S albumin	2	2	2	2	2	1	2	0	2	2	2	1	2	1	2	0	2	2	2	1	2	1	2	0	2	2	2	1	7.9	7.9	7.9	29.648	291	291;291	1	12	0	57.626	By matching	By matching	By MS/MS	By matching	By MS/MS	By MS/MS
AT2G17630.1	AT2G17630.1	6	2	2	>AT2G17630.1 | Symbols: | Pyridoxal phosphate (PLP)-dependent transferases superfamily protein | chr2:7666637-7667905 FORWARD LENGTH=422	1	6	2	2	0	1	3	0	6	6	6	5	0	0	1	0	2	2	2	1	0	0	1	0	2	2	2	1	19.2	7.6	7.6	46.633	422	422	1	8	0	12.217	By matching	By matching	By matching	By matching	By MS/MS	By MS/MS
AT2G18960.1;AT4G30190.1;AT4G30190.2;AT1G80660.2;AT5G57350.2;AT5G57350.1;AT1G80660.1;AT5G62670.1;AT3G47950.1;AT1G17260.1;AT3G42640.1;AT2G07560.1;AT2G24520.1	AT2G18960.1;AT4G30190.1;AT4G30190.2	7;6;6;3;3;3;3;3;3;2;2;2;1	7;6;6;3;3;3;3;3;3;2;2;2;1	7;6;6;3;3;3;3;3;3;2;2;2;1	>AT2G18960.1 | Symbols: AHA1, PMA, OST2, HA1 | H(+)-ATPase 1 | chr2:8221858-8227268 FORWARD LENGTH=949;>AT4G30190.1 | Symbols: AHA2, PMA2, HA2 | H(+)-ATPase 2 | chr4:14770820-14775920 REVERSE LENGTH=948;>AT4G30190.2 | Symbols: HA2 | H(+)-ATPase 2 | chr4:14	13	7	7	7	1	2	6	1	6	6	6	5	1	2	6	1	6	6	6	5	1	2	6	1	6	6	6	5	9.3	9.3	9.3	104.22	949	949;948;981;945;949;949;954;956;960;947;948;949;931	1	33	0	49.878	By matching	By matching	By MS/MS	By matching	By MS/MS	By MS/MS
AT2G19520.1;AT4G29730.1	AT2G19520.1	4;1	4;1	4;1	>AT2G19520.1 | Symbols: FVE, ACG1, MSI4, NFC4, NFC04, ATMSI4 | Transducin family protein / WD-40 repeat family protein | chr2:8456006-8459235 FORWARD LENGTH=507	2	4	4	4	1	2	1	1	4	4	4	4	1	2	1	1	4	4	4	4	1	2	1	1	4	4	4	4	12.8	12.8	12.8	55.758	507	507;487	1	25	0	36.666	By matching	By matching	By matching	By matching	By MS/MS	By MS/MS
AT2G21330.1;AT2G21330.3;AT2G21330.2	AT2G21330.1;AT2G21330.3;AT2G21330.2	12;11;8	5;5;4	5;5;4	>AT2G21330.1 | Symbols: FBA1 | fructose-bisphosphate aldolase 1 | chr2:9128416-9130152 REVERSE LENGTH=399;>AT2G21330.3 | Symbols: FBA1 | fructose-bisphosphate aldolase 1 | chr2:9128416-9130152 REVERSE LENGTH=389;>AT2G21330.2 | Symbols: FBA1 | fructose-bisp	3	12	5	5	10	9	11	10	11	12	12	10	3	3	4	4	5	5	5	4	3	3	4	4	5	5	5	4	38.3	21.3	21.3	42.93	399	399;389;311	1	38	0	113.71	By MS/MS	By MS/MS	By MS/MS	By MS/MS	By MS/MS	By MS/MS
AT2G22230.1	AT2G22230.1	2	2	1	>AT2G22230.1 | Symbols: | Thioesterase superfamily protein | chr2:9450042-9451427 FORWARD LENGTH=220	1	2	2	1	0	1	2	0	2	2	2	2	0	1	2	0	2	2	2	2	0	1	1	0	1	1	1	1	10	10	6.4	24.242	220	220	1	11	0	12.67	By matching	By matching	By MS/MS	By matching	By MS/MS	By MS/MS
AT2G24280.1	AT2G24280.1	4	4	4	>AT2G24280.1 | Symbols: | alpha/beta-Hydrolases superfamily protein | chr2:10334622-10336927 FORWARD LENGTH=494	1	4	4	4	0	1	0	0	4	2	0	1	0	1	0	0	4	2	0	1	0	1	0	0	4	2	0	1	7.3	7.3	7.3	56.232	494	494	1	8	0	23.362	By matching	By matching	By matching	By matching	By MS/MS	By MS/MS
AT2G28000.1	AT2G28000.1	3	3	3	>AT2G28000.1 | Symbols: CPN60A, CH-CPN60A, SLP | chaperonin-60alpha | chr2:11926603-11929184 FORWARD LENGTH=586	1	3	3	3	0	0	3	0	3	3	1	2	0	0	3	0	3	3	1	2	0	0	3	0	3	3	1	2	7.2	7.2	7.2	62.071	586	586	1	12	0	18.856	By matching	By matching	By MS/MS	By matching	By MS/MS	By matching
AT2G33150.1	AT2G33150.1	4	4	4	>AT2G33150.1 | Symbols: PKT3, PED1, KAT2 | peroxisomal 3-ketoacyl-CoA thiolase 3 | chr2:14047814-14050983 REVERSE LENGTH=462	1	4	4	4	1	2	1	1	4	4	4	2	1	2	1	1	4	4	4	2	1	2	1	1	4	4	4	2	17.1	17.1	17.1	48.578	462	462	1	19	0	50.607	By matching	By matching	By matching	By matching	By MS/MS	By MS/MS
AT2G33340.2;AT2G33340.1;AT2G33340.3	AT2G33340.2;AT2G33340.1;AT2G33340.3	7;7;6	7;7;6	6;6;5	>AT2G33340.2 | Symbols: MAC3B | MOS4-associated complex 3B | chr2:14126584-14131000 REVERSE LENGTH=525;>AT2G33340.1 | Symbols: MAC3B | MOS4-associated complex 3B | chr2:14126584-14131000 REVERSE LENGTH=525;>AT2G33340.3 | Symbols: MAC3B | MOS4-associated	3	7	7	6	3	5	5	4	6	6	3	3	3	5	5	4	6	6	3	3	3	4	4	3	5	5	2	3	21.1	21.1	19	56.727	525	525;525;485	1	35	0	78.951	By matching	By MS/MS	By MS/MS	By MS/MS	By MS/MS	By MS/MS
AT2G33530.1	AT2G33530.1	4	4	4	>AT2G33530.1 | Symbols: scpl46 | serine carboxypeptidase-like 46 | chr2:14197866-14200536 REVERSE LENGTH=465	1	4	4	4	0	2	4	0	4	4	4	3	0	2	4	0	4	4	4	3	0	2	4	0	4	4	4	3	10.1	10.1	10.1	51.883	465	465	1	21	0	28.883	By matching	By matching	By MS/MS	By matching	By MS/MS	By matching
AT2G34420.1;AT2G34430.1;AT1G29930.1;AT1G29920.1;AT1G29910.1	AT2G34420.1;AT2G34430.1;AT1G29930.1;AT1G29920.1;AT1G29910.1	5;4;4;4;4	5;4;4;4;4	2;1;1;1;1	>AT2G34420.1 | Symbols: LHB1B2, LHCB1.5 | photosystem II light harvesting complex gene B1B2 | chr2:14522716-14523513 REVERSE LENGTH=265;>AT2G34430.1 | Symbols: LHB1B1, LHCB1.4 | light-harvesting chlorophyll-protein complex II subunit B1 | chr2:14524818-145	5	5	5	2	3	2	3	2	4	4	3	3	3	2	3	2	4	4	3	3	1	1	1	1	2	1	1	1	28.3	28.3	15.5	28.054	265	265;266;267;267;267	1	28	0	72.779	By matching	By matching	By MS/MS	By MS/MS	By MS/MS	By MS/MS
AT2G34810.1;AT1G26420.1;AT1G26390.1;AT1G26380.1	AT2G34810.1	10;1;1;1	10;1;1;1	10;1;1;1	>AT2G34810.1 | Symbols: | FAD-binding Berberine family protein | chr2:14685292-14686914 FORWARD LENGTH=540	4	10	10	10	0	5	10	1	8	9	8	5	0	5	10	1	8	9	8	5	0	5	10	1	8	9	8	5	18.7	18.7	18.7	61.306	540	540;529;530;535	1	49	0	69.804	By matching	By matching	By MS/MS	By matching	By MS/MS	By MS/MS
AT2G35410.1	AT2G35410.1	3	3	3	>AT2G35410.1 | Symbols: | RNA-binding (RRM/RBD/RNP motifs) family protein | chr2:14898341-14899590 FORWARD LENGTH=308	1	3	3	3	0	0	1	0	3	3	3	3	0	0	1	0	3	3	3	3	0	0	1	0	3	3	3	3	11.4	11.4	11.4	33.785	308	308	1	13	0	46.748	By matching	By matching	By matching	By matching	By MS/MS	By MS/MS
AT2G36460.1;AT2G36460.2	AT2G36460.1;AT2G36460.2	13;7	7;4	6;3	>AT2G36460.1 | Symbols: | Aldolase superfamily protein | chr2:15296929-15298387 REVERSE LENGTH=358;>AT2G36460.2 | Symbols: | Aldolase superfamily protein | chr2:15296929-15297732 REVERSE LENGTH=267	2	13	7	6	11	9	13	8	13	13	12	13	6	4	7	4	7	7	6	7	5	4	6	3	6	6	5	6	41.9	22.1	19.3	38.386	358	358;267	1	55	0	80.56	By MS/MS	By MS/MS	By MS/MS	By matching	By MS/MS	By MS/MS
AT2G37220.1	AT2G37220.1	7	7	4	>AT2G37220.1 | Symbols: | RNA-binding (RRM/RBD/RNP motifs) family protein | chr2:15634980-15636331 REVERSE LENGTH=289	1	7	7	4	3	2	4	3	6	7	7	6	3	2	4	3	6	7	7	6	1	2	1	1	3	4	4	3	32.9	32.9	23.2	30.718	289	289	1	47	0	323.31	By matching	By matching	By MS/MS	By matching	By MS/MS	By MS/MS
AT2G38040.2;AT2G38040.1	AT2G38040.2;AT2G38040.1	13;13	13;13	13;13	>AT2G38040.2 | Symbols: CAC3 | acetyl Co-enzyme a carboxylase carboxyltransferase alpha subunit | chr2:15917612-15920749 FORWARD LENGTH=769;>AT2G38040.1 | Symbols: CAC3 | acetyl Co-enzyme a carboxylase carboxyltransferase alpha subunit | chr2:15917612-1592	2	13	13	13	0	0	8	0	10	12	11	11	0	0	8	0	10	12	11	11	0	0	8	0	10	12	11	11	21.6	21.6	21.6	85.305	769	769;769	1	58	0	167.43	By matching	By matching	By MS/MS	By matching	By MS/MS	By MS/MS
AT2G38540.1	AT2G38540.1	3	3	3	>AT2G38540.1 | Symbols: LP1, LTP1, ATLTP1 | lipid transfer protein 1 | chr2:16130418-16130893 FORWARD LENGTH=118	1	3	3	3	2	1	3	0	2	1	1	1	2	1	3	0	2	1	1	1	2	1	3	0	2	1	1	1	26.3	26.3	26.3	11.755	118	118	1	11	0	16.553	By matching	By matching	By MS/MS	By matching	By matching	By matching
AT2G39730.3;AT2G39730.2;AT2G39730.1	AT2G39730.3;AT2G39730.2;AT2G39730.1	12;12;12	12;12;12	12;12;12	>AT2G39730.3 | Symbols: RCA | rubisco activase | chr2:16571174-16573345 REVERSE LENGTH=441;>AT2G39730.2 | Symbols: RCA | rubisco activase | chr2:16571046-16573345 REVERSE LENGTH=446;>AT2G39730.1 | Symbols: RCA | rubisco activase | chr2:16570951-16573345 RE	3	12	12	12	2	3	12	1	10	9	6	5	2	3	12	1	10	9	6	5	2	3	12	1	10	9	6	5	40.8	40.8	40.8	48.5	441	441;446;474	1	59	0	323.31	By matching	By matching	By MS/MS	By matching	By MS/MS	By MS/MS
AT2G40290.1;AT2G40290.3;AT2G40290.2;AT5G05470.1	AT2G40290.1;AT2G40290.3;AT2G40290.2	5;4;4;1	5;4;4;1	5;4;4;1	>AT2G40290.1 | Symbols: | Eukaryotic translation initiation factor 2 subunit 1 | chr2:16829030-16830889 REVERSE LENGTH=344;>AT2G40290.3 | Symbols: | Eukaryotic translation initiation factor 2 subunit 1 | chr2:16829872-16830889 REVERSE LENGTH=241;>AT2G402	4	5	5	5	1	1	2	1	5	5	4	5	1	1	2	1	5	5	4	5	1	1	2	1	5	5	4	5	17.7	17.7	17.7	38.747	344	344;241;241;344	1	25	0	35.263	By matching	By matching	By matching	By matching	By MS/MS	By MS/MS
AT2G42520.1;AT3G58570.1	AT2G42520.1;AT3G58570.1	3;2	3;2	2;1	>AT2G42520.1 | Symbols: | P-loop containing nucleoside triphosphate hydrolases superfamily protein | chr2:17705382-17708744 FORWARD LENGTH=633;>AT3G58570.1 | Symbols: | P-loop containing nucleoside triphosphate hydrolases superfamily protein | chr3:21657	2	3	3	2	0	0	2	0	2	2	0	1	0	0	2	0	2	2	0	1	0	0	2	0	2	2	0	0	5.8	5.8	4.1	67.625	633	633;646	1	7	0	17.57	By matching	By matching	By MS/MS	By matching	By matching	By matching
AT2G42910.1	AT2G42910.1	4	4	4	>AT2G42910.1 | Symbols: | Phosphoribosyltransferase family protein | chr2:17856396-17858394 FORWARD LENGTH=337	1	4	4	4	0	0	0	1	3	4	4	4	0	0	0	1	3	4	4	4	0	0	0	1	3	4	4	4	12.5	12.5	12.5	37.56	337	337	1	16	0	26.633	By matching	By matching	By matching	By matching	By MS/MS	By MS/MS
AT2G45180.1	AT2G45180.1	3	3	3	>AT2G45180.1 | Symbols: | Bifunctional inhibitor/lipid-transfer protein/seed storage 2S albumin superfamily protein | chr2:18626377-18626781 FORWARD LENGTH=134	1	3	3	3	0	1	3	0	3	2	1	2	0	1	3	0	3	2	1	2	0	1	3	0	3	2	1	2	11.2	11.2	11.2	13.955	134	134	1	12	0	20.317	By matching	By matching	By MS/MS	By matching	By MS/MS	By matching
AT2G45220.1	AT2G45220.1	9	9	9	>AT2G45220.1 | Symbols: | Plant invertase/pectin methylesterase inhibitor superfamily | chr2:18644281-18646394 REVERSE LENGTH=511	1	9	9	9	5	1	8	4	8	8	8	4	5	1	8	4	8	8	8	4	5	1	8	4	8	8	8	4	22.9	22.9	22.9	55.976	511	511	1	52	0	323.31	By MS/MS	By matching	By MS/MS	By matching	By MS/MS	By MS/MS
AT2G45960.2;AT2G45960.1;AT2G45960.3	AT2G45960.2;AT2G45960.1;AT2G45960.3	3;3;3	2;2;2	1;1;1	>AT2G45960.2 | Symbols: PIP1B, TMP-A, ATHH2, PIP1;2 | plasma membrane intrinsic protein 1B | chr2:18910450-18911579 FORWARD LENGTH=274;>AT2G45960.1 | Symbols: PIP1B, TMP-A, ATHH2, PIP1;2 | plasma membrane intrinsic protein 1B | chr2:18910450-18911703 FORWA	3	3	2	1	3	2	3	3	2	2	2	2	2	1	2	2	1	1	1	1	1	1	1	1	1	1	1	1	12	8.8	3.6	29.132	274	274;286;301	1	11	0	13.121	By matching	By matching	By MS/MS	By matching	By MS/MS	By MS/MS
AT2G47470.3;AT2G47470.4;AT2G47470.1;AT2G47470.2	AT2G47470.3;AT2G47470.4;AT2G47470.1;AT2G47470.2	2;2;2;1	2;2;2;1	2;2;2;1	>AT2G47470.3 | Symbols: ATPDIL2-1, UNE5, MEE30, PDI11, ATPDI11 | thioredoxin family protein | chr2:19481503-19483571 FORWARD LENGTH=323;>AT2G47470.4 | Symbols: ATPDIL2-1, UNE5, MEE30, PDI11, ATPDI11 | thioredoxin family protein | chr2:19481503-19483683 FOR	4	2	2	2	1	1	1	0	2	2	2	2	1	1	1	0	2	2	2	2	1	1	1	0	2	2	2	2	8.7	8.7	8.7	35.62	323	323;335;361;266	1	11	0	11.33	By matching	By matching	By matching	By matching	By MS/MS	By MS/MS
AT3G01500.1;AT3G01500.3;AT3G01500.2	AT3G01500.1;AT3G01500.3;AT3G01500.2	2;2;2	2;2;2	1;1;1	>AT3G01500.1 | Symbols: CA1, ATBCA1, SABP3, ATSABP3 | carbonic anhydrase 1 | chr3:194853-196716 REVERSE LENGTH=270;>AT3G01500.3 | Symbols: CA1 | carbonic anhydrase 1 | chr3:195173-197873 REVERSE LENGTH=336;>AT3G01500.2 | Symbols: CA1 | carbonic anhydrase 1	3	2	2	1	0	0	2	0	2	2	2	1	0	0	2	0	2	2	2	1	0	0	1	0	1	1	1	0	10.7	10.7	5.9	29.504	270	270;336;347	1	9	0	35.405	By matching	By matching	By MS/MS	By matching	By MS/MS	By MS/MS
AT3G02110.1	AT3G02110.1	9	9	9	>AT3G02110.1 | Symbols: scpl25 | serine carboxypeptidase-like 25 | chr3:370902-373637 REVERSE LENGTH=473	1	9	9	9	1	6	8	1	9	9	8	8	1	6	8	1	9	9	8	8	1	6	8	1	9	9	8	8	22.4	22.4	22.4	53.4	473	473	1	57	0	178.84	By matching	By MS/MS	By MS/MS	By matching	By MS/MS	By MS/MS
AT3G02230.1;AT5G15650.1	AT3G02230.1;AT5G15650.1	3;2	3;2	3;2	>AT3G02230.1 | Symbols: RGP1, ATRGP1 | reversibly glycosylated polypeptide 1 | chr3:415463-417304 FORWARD LENGTH=357;>AT5G15650.1 | Symbols: RGP2, ATRGP2 | reversibly glycosylated polypeptide 2 | chr5:5092203-5094093 FORWARD LENGTH=360	2	3	3	3	1	1	1	1	1	1	3	3	1	1	1	1	1	1	3	3	1	1	1	1	1	1	3	3	10.4	10.4	10.4	40.629	357	357;360	1	12	0	20.453	By matching	By matching	By matching	By matching	By matching	By matching
AT3G02880.1	AT3G02880.1	10	10	9	>AT3G02880.1 | Symbols: | Leucine-rich repeat protein kinase family protein | chr3:634819-636982 FORWARD LENGTH=627	1	10	10	9	2	2	5	0	7	9	7	6	2	2	5	0	7	9	7	6	2	2	5	0	7	8	7	6	20.9	20.9	19	67.752	627	627	1	38	0	67.388	By matching	By matching	By MS/MS	By matching	By MS/MS	By MS/MS
AT3G04600.3;AT3G04600.2;AT3G04600.1	AT3G04600.3;AT3G04600.2;AT3G04600.1	3;3;3	3;3;3	3;3;3	>AT3G04600.3 | Symbols: | Nucleotidylyl transferase superfamily protein | chr3:1243152-1245958 FORWARD LENGTH=402;>AT3G04600.2 | Symbols: | Nucleotidylyl transferase superfamily protein | chr3:1243152-1245958 FORWARD LENGTH=402;>AT3G04600.1 | Symbols: |	3	3	3	3	0	0	0	0	3	3	3	2	0	0	0	0	3	3	3	2	0	0	0	0	3	3	3	2	7.7	7.7	7.7	45.754	402	402;402;402	1	11	0	22.289	By matching	By matching	By matching	By matching	By MS/MS	By MS/MS
AT3G05060.1	AT3G05060.1	3	3	3	>AT3G05060.1 | Symbols: | NOP56-like pre RNA processing ribonucleoprotein | chr3:1413174-1415564 REVERSE LENGTH=533	1	3	3	3	0	0	3	0	3	2	1	2	0	0	3	0	3	2	1	2	0	0	3	0	3	2	1	2	7.5	7.5	7.5	59.002	533	533	1	11	0	20.965	By matching	By matching	By MS/MS	By matching	By MS/MS	By MS/MS
AT5G49460.1;AT3G06650.1	AT5G49460.1;AT3G06650.1	2;2	2;2	2;2	>AT5G49460.1 | Symbols: ACLB-2 | ATP citrate lyase subunit B 2 | chr5:20055048-20058195 FORWARD LENGTH=608;>AT3G06650.1 | Symbols: ACLB-1 | ATP-citrate lyase B-1 | chr3:2079247-2082633 REVERSE LENGTH=608	2	2	2	2	0	0	1	0	2	2	2	2	0	0	1	0	2	2	2	2	0	0	1	0	2	2	2	2	4.1	4.1	4.1	65.827	608	608;608	1	9	0	13.025	By matching	By matching	By MS/MS	By matching	By MS/MS	By MS/MS
AT3G07810.1;AT3G07810.2	AT3G07810.1;AT3G07810.2	2;2	2;2	2;2	>AT3G07810.1 | Symbols: | RNA-binding (RRM/RBD/RNP motifs) family protein | chr3:2492875-2495052 FORWARD LENGTH=494;>AT3G07810.2 | Symbols: | RNA-binding (RRM/RBD/RNP motifs) family protein | chr3:2492875-2495102 FORWARD LENGTH=495	2	2	2	2	0	0	0	0	2	2	2	1	0	0	0	0	2	2	2	1	0	0	0	0	2	2	2	1	6.5	6.5	6.5	51.871	494	494;495	1	7	0	13.45	By matching	By matching	By matching	By matching	By matching	By MS/MS
AT3G08030.2;AT3G08030.1	AT3G08030.2;AT3G08030.1	3;3	3;3	3;3	>AT3G08030.2 | Symbols: | Protein of unknown function, DUF642 | chr3:2564517-2565819 FORWARD LENGTH=323;>AT3G08030.1 | Symbols: | Protein of unknown function, DUF642 | chr3:2564191-2565819 FORWARD LENGTH=365	2	3	3	3	0	0	3	0	3	3	3	1	0	0	3	0	3	3	3	1	0	0	3	0	3	3	3	1	11.1	11.1	11.1	34.7	323	323;365	1	13	0	18.04	By matching	By matching	By MS/MS	By matching	By MS/MS	By MS/MS
AT3G08940.2;AT3G08940.1	AT3G08940.2;AT3G08940.1	6;3	6;3	6;3	>AT3G08940.2 | Symbols: LHCB4.2 | light harvesting complex photosystem II | chr3:2717717-2718665 FORWARD LENGTH=287;>AT3G08940.1 | Symbols: LHCB4.2 | light harvesting complex photosystem II | chr3:2717717-2718400 FORWARD LENGTH=227	2	6	6	6	1	0	4	0	6	5	5	5	1	0	4	0	6	5	5	5	1	0	4	0	6	5	5	5	24.4	24.4	24.4	31.193	287	287;227	1	29	0	94.092	By matching	By matching	By MS/MS	By matching	By MS/MS	By MS/MS
AT3G09260.1;AT1G66270.2;AT1G66270.1;AT1G66280.1;AT3G21370.1;AT5G28510.1	AT3G09260.1	17;4;4;3;1;1	17;4;4;3;1;1	16;3;3;2;0;0	>AT3G09260.1 | Symbols: PYK10, PSR3.1, BGLU23, LEB | Glycosyl hydrolase superfamily protein | chr3:2840657-2843730 REVERSE LENGTH=524	6	17	17	16	0	6	10	0	17	17	10	10	0	6	10	0	17	17	10	10	0	6	9	0	16	16	9	9	44.3	44.3	42.6	59.72	524	524;522;524;524;527;533	1	91	0	323.31	By matching	By MS/MS	By MS/MS	By matching	By MS/MS	By MS/MS
AT3G10690.1	AT3G10690.1	2	2	2	>AT3G10690.1 | Symbols: GYRA | DNA GYRASE A | chr3:3339612-3346243 REVERSE LENGTH=950	1	2	2	2	0	0	0	0	2	2	1	2	0	0	0	0	2	2	1	2	0	0	0	0	2	2	1	2	2.9	2.9	2.9	104.54	950	950	1	7	0	14.265	By matching	By matching	By matching	By matching	By MS/MS	By MS/MS
AT3G11130.1;AT3G08530.1	AT3G11130.1;AT3G08530.1	9;8	9;8	9;8	>AT3G11130.1 | Symbols: | Clathrin, heavy chain | chr3:3482575-3491667 REVERSE LENGTH=1705;>AT3G08530.1 | Symbols: | Clathrin, heavy chain | chr3:2587171-2595411 REVERSE LENGTH=1703	2	9	9	9	1	1	5	1	9	7	1	2	1	1	5	1	9	7	1	2	1	1	5	1	9	7	1	2	5.8	5.8	5.8	193.24	1705	1705;1703	1	27	0	53.179	By matching	By matching	By MS/MS	By matching	By MS/MS	By MS/MS
AT3G12145.1	AT3G12145.1	4	4	4	>AT3G12145.1 | Symbols: FLR1, FLOR1 | Leucine-rich repeat (LRR) family protein | chr3:3874764-3876075 REVERSE LENGTH=325	1	4	4	4	0	1	4	0	3	3	0	0	0	1	4	0	3	3	0	0	0	1	4	0	3	3	0	0	20.3	20.3	20.3	35.808	325	325	1	12	0	24.929	By matching	By matching	By MS/MS	By matching	By matching	By MS/MS
AT3G12290.1	AT3G12290.1	2	2	2	>AT3G12290.1 | Symbols: | Amino acid dehydrogenase family protein | chr3:3919591-3921326 FORWARD LENGTH=299	1	2	2	2	0	0	1	0	2	2	2	2	0	0	1	0	2	2	2	2	0	0	1	0	2	2	2	2	8	8	8	31.589	299	299	1	9	0	13.599	By matching	By matching	By matching	By matching	By MS/MS	By MS/MS
AT3G12700.1;AT3G12700.2	AT3G12700.1	5;2	5;2	5;2	>AT3G12700.1 | Symbols: | Eukaryotic aspartyl protease family protein | chr3:4037136-4039043 FORWARD LENGTH=461	2	5	5	5	0	1	5	0	4	4	5	4	0	1	5	0	4	4	5	4	0	1	5	0	4	4	5	4	13.7	13.7	13.7	50.567	461	461;263	1	26	0	193.78	By matching	By matching	By MS/MS	By matching	By MS/MS	By MS/MS
AT3G12800.1	AT3G12800.1	2	2	2	>AT3G12800.1 | Symbols: SDRB, DECR | short-chain dehydrogenase-reductase B | chr3:4063463-4064757 REVERSE LENGTH=298	1	2	2	2	2	0	1	2	2	2	2	2	2	0	1	2	2	2	2	2	2	0	1	2	2	2	2	2	8.4	8.4	8.4	31.796	298	298	1	13	0	21.026	By matching	By matching	By matching	By matching	By MS/MS	By MS/MS
AT3G13750.1	AT3G13750.1	9	9	9	>AT3G13750.1 | Symbols: BGAL1 | beta galactosidase 1 | chr3:4511192-4515756 FORWARD LENGTH=847	1	9	9	9	2	5	7	3	7	8	7	6	2	5	7	3	7	8	7	6	2	5	7	3	7	8	7	6	15.5	15.5	15.5	93.658	847	847	1	47	0	91.699	By matching	By matching	By MS/MS	By matching	By MS/MS	By MS/MS
AT3G13790.1;AT3G13790.2;AT1G55120.1;AT1G55120.2;AT1G55120.3	AT3G13790.1;AT3G13790.2	19;18;2;1;1	19;18;2;1;1	19;18;2;1;1	>AT3G13790.1 | Symbols: ATCWINV1, ATBFRUCT1 | Glycosyl hydrolases family 32 protein | chr3:4533084-4535831 REVERSE LENGTH=584;>AT3G13790.2 | Symbols: ATBFRUCT1 | Glycosyl hydrolases family 32 protein | chr3:4533084-4535831 REVERSE LENGTH=581	5	19	19	19	3	10	14	5	19	19	19	18	3	10	14	5	19	19	19	18	3	10	14	5	19	19	19	18	37.7	37.7	37.7	66.28	584	584;581;594;555;579	1	144	0	323.31	By matching	By MS/MS	By MS/MS	By MS/MS	By MS/MS	By MS/MS
AT3G14210.1	AT3G14210.1	4	4	4	>AT3G14210.1 | Symbols: ESM1 | epithiospecifier modifier 1 | chr3:4729886-4731562 FORWARD LENGTH=392	1	4	4	4	1	2	3	0	3	2	0	0	1	2	3	0	3	2	0	0	1	2	3	0	3	2	0	0	16.6	16.6	16.6	44.06	392	392	1	11	0	85.221	By matching	By matching	By MS/MS	By matching	By MS/MS	By matching
AT3G14310.1;AT1G53830.1;AT3G10720.1;AT4G02320.1;AT3G60730.1;AT2G26440.1;AT1G23200.1;AT1G02810.1;AT3G49220.1;AT3G10720.2;AT4G15980.1	AT3G14310.1	19;4;1;1;1;1;1;1;1;1;1	19;4;1;1;1;1;1;1;1;1;1	18;3;0;0;0;0;0;0;0;0;0	>AT3G14310.1 | Symbols: ATPME3, PME3 | pectin methylesterase 3 | chr3:4772214-4775095 REVERSE LENGTH=592	11	19	19	18	13	17	19	15	19	18	19	19	13	17	19	15	19	18	19	19	12	16	18	14	18	17	18	18	41.7	41.7	40.5	64.255	592	592;587;263;518;519;547;554;579;598;619;701	1	342	0	323.31	By MS/MS	By MS/MS	By MS/MS	By MS/MS	By MS/MS	By MS/MS
AT3G15356.1	AT3G15356.1	11	11	7	>AT3G15356.1 | Symbols: | Legume lectin family protein | chr3:5174603-5175418 REVERSE LENGTH=271	1	11	11	7	8	6	8	6	10	10	8	6	8	6	8	6	10	10	8	6	5	4	5	3	6	6	5	4	54.6	54.6	34.3	29.749	271	271	1	91	0	323.31	By MS/MS	By MS/MS	By MS/MS	By MS/MS	By MS/MS	By MS/MS
AT3G16420.3;AT3G16420.2;AT3G16420.1;AT3G16430.2;AT3G16430.1	AT3G16420.3;AT3G16420.2;AT3G16420.1	9;9;9;4;4	9;9;9;4;4	9;9;9;4;4	>AT3G16420.3 | Symbols: PBP1 | PYK10-binding protein 1 | chr3:5579560-5580674 FORWARD LENGTH=298;>AT3G16420.2 | Symbols: PBP1 | PYK10-binding protein 1 | chr3:5579560-5580674 FORWARD LENGTH=298;>AT3G16420.1 | Symbols: PBP1, JAL30 | PYK10-binding protein 1	5	9	9	9	2	2	7	0	8	9	4	5	2	2	7	0	8	9	4	5	2	2	7	0	8	9	4	5	39.6	39.6	39.6	32.158	298	298;298;298;296;296	1	45	0	317.7	By matching	By MS/MS	By matching	By matching	By MS/MS	By MS/MS
AT3G16460.2;AT3G16460.1	AT3G16460.2;AT3G16460.1	8;8	8;8	8;8	>AT3G16460.2 | Symbols: | Mannose-binding lectin superfamily protein | chr3:5593029-5595522 FORWARD LENGTH=705;>AT3G16460.1 | Symbols: | Mannose-binding lectin superfamily protein | chr3:5593029-5595522 FORWARD LENGTH=705	2	8	8	8	2	4	6	1	7	8	4	3	2	4	6	1	7	8	4	3	2	4	6	1	7	8	4	3	16.9	16.9	16.9	72.473	705	705;705	1	37	0	81.385	By matching	By matching	By MS/MS	By matching	By MS/MS	By MS/MS
AT3G16470.2;AT3G16470.1;AT3G16470.3	AT3G16470.2;AT3G16470.1;AT3G16470.3	6;6;5	6;6;5	6;6;5	>AT3G16470.2 | Symbols: JR1 | Mannose-binding lectin superfamily protein | chr3:5596096-5597709 REVERSE LENGTH=451;>AT3G16470.1 | Symbols: JR1 | Mannose-binding lectin superfamily protein | chr3:5596096-5597709 REVERSE LENGTH=451;>AT3G16470.3 | Symbols: JR	3	6	6	6	0	0	4	0	4	6	3	3	0	0	4	0	4	6	3	3	0	0	4	0	4	6	3	3	30.6	30.6	30.6	48.496	451	451;451;297	1	20	0	39.402	By matching	By matching	By MS/MS	By matching	By MS/MS	By MS/MS
AT3G16530.1	AT3G16530.1	9	6	6	>AT3G16530.1 | Symbols: | Legume lectin family protein | chr3:5624586-5625416 REVERSE LENGTH=276	1	9	6	6	7	7	8	8	9	9	8	8	5	6	6	6	6	6	6	6	5	6	6	6	6	6	6	6	44.6	28.3	28.3	30.509	276	276	1	78	0	267.39	By MS/MS	By MS/MS	By MS/MS	By MS/MS	By MS/MS	By MS/MS
AT3G18080.1;AT3G18070.2;AT3G18070.1	AT3G18080.1	10;2;2	10;2;2	10;2;2	>AT3G18080.1 | Symbols: BGLU44 | B-S glucosidase 44 | chr3:6191586-6194124 FORWARD LENGTH=512	3	10	10	10	0	4	9	0	9	8	4	4	0	4	9	0	9	8	4	4	0	4	9	0	9	8	4	4	25.4	25.4	25.4	58.983	512	512;424;501	1	41	0	146.93	By matching	By MS/MS	By MS/MS	By matching	By MS/MS	By MS/MS
AT3G19760.1;AT1G51380.1	AT3G19760.1	3;1	3;1	3;1	>AT3G19760.1 | Symbols: EIF4A-III | eukaryotic initiation factor 4A-III | chr3:6863790-6866242 FORWARD LENGTH=408	2	3	3	3	0	0	1	0	2	2	2	3	0	0	1	0	2	2	2	3	0	0	1	0	2	2	2	3	9.6	9.6	9.6	45.844	408	408;392	1	10	0	18.657	By matching	By matching	By matching	By matching	By MS/MS	By MS/MS
AT3G20370.1	AT3G20370.1	4	4	4	>AT3G20370.1 | Symbols: | TRAF-like family protein | chr3:7105481-7107079 FORWARD LENGTH=379	1	4	4	4	4	4	4	4	3	4	1	1	4	4	4	4	3	4	1	1	4	4	4	4	3	4	1	1	14.8	14.8	14.8	43.449	379	379	1	25	0	53.597	By MS/MS	By MS/MS	By MS/MS	By MS/MS	By MS/MS	By MS/MS
AT3G20820.1	AT3G20820.1	7	7	7	>AT3G20820.1 | Symbols: | Leucine-rich repeat (LRR) family protein | chr3:7280930-7282027 FORWARD LENGTH=365	1	7	7	7	2	6	7	4	7	6	5	7	2	6	7	4	7	6	5	7	2	6	7	4	7	6	5	7	24.7	24.7	24.7	39.862	365	365	1	44	0	323.31	By matching	By MS/MS	By MS/MS	By matching	By MS/MS	By MS/MS
AT3G26060.1;AT3G26060.2	AT3G26060.1;AT3G26060.2	6;6	6;6	6;6	>AT3G26060.1 | Symbols: ATPRX Q | Thioredoxin superfamily protein | chr3:9524807-9526123 FORWARD LENGTH=216;>AT3G26060.2 | Symbols: ATPRX Q | Thioredoxin superfamily protein | chr3:9524807-9526123 FORWARD LENGTH=217	2	6	6	6	4	1	5	3	6	6	6	6	4	1	5	3	6	6	6	6	4	1	5	3	6	6	6	6	29.2	29.2	29.2	23.678	216	216;217	1	42	0	79.014	By matching	By matching	By MS/MS	By matching	By MS/MS	By MS/MS
AT3G26070.1	AT3G26070.1	2	2	2	>AT3G26070.1 | Symbols: | Plastid-lipid associated protein PAP / fibrillin family protein | chr3:9526904-9528199 FORWARD LENGTH=242	1	2	2	2	2	1	2	1	2	2	0	1	2	1	2	1	2	2	0	1	2	1	2	1	2	2	0	1	10.7	10.7	10.7	27.163	242	242	1	11	0	12.917	By MS/MS	By matching	By matching	By matching	By matching	By MS/MS
AT3G26420.1	AT3G26420.1	2	2	2	>AT3G26420.1 | Symbols: ATRZ-1A | RNA-binding (RRM/RBD/RNP motifs) family protein with retrovirus zinc finger-like domain | chr3:9671953-9673055 FORWARD LENGTH=245	1	2	2	2	0	0	2	0	2	2	2	2	0	0	2	0	2	2	2	2	0	0	2	0	2	2	2	2	7.3	7.3	7.3	26.923	245	245	1	10	0	12.037	By matching	By matching	By matching	By matching	By MS/MS	By MS/MS
AT3G26650.1;AT1G12900.2	AT3G26650.1;AT1G12900.2	15;10	15;10	3;0	>AT3G26650.1 | Symbols: GAPA, GAPA-1 | glyceraldehyde 3-phosphate dehydrogenase A subunit | chr3:9795226-9796848 FORWARD LENGTH=396;>AT1G12900.2 | Symbols: GAPA-2 | glyceraldehyde 3-phosphate dehydrogenase A subunit 2 | chr1:4392634-4393747 REVERSE LENGTH=	2	15	15	3	4	7	12	4	14	13	13	14	4	7	12	4	14	13	13	14	0	1	2	0	3	3	3	3	44.2	44.2	12.4	42.489	396	396;317	1	94	0	323.31	By matching	By MS/MS	By MS/MS	By MS/MS	By MS/MS	By MS/MS
AT3G42170.1	AT3G42170.1	2	2	2	>AT3G42170.1 | Symbols: | BED zinc finger ;hAT family dimerisation domain | chr3:14321838-14323928 FORWARD LENGTH=696	1	2	2	2	0	0	1	0	2	2	2	2	0	0	1	0	2	2	2	2	0	0	1	0	2	2	2	2	4	4	4	78.813	696	696	1	9	0	14.626	By matching	By matching	By matching	By matching	By MS/MS	By MS/MS
AT3G44110.2;AT3G44110.1;AT5G22060.1	AT3G44110.2;AT3G44110.1;AT5G22060.1	2;2;1	2;2;1	2;2;1	>AT3G44110.2 | Symbols: ATJ3, ATJ | DNAJ homologue 3 | chr3:15869179-15871059 REVERSE LENGTH=343;>AT3G44110.1 | Symbols: ATJ3, ATJ | DNAJ homologue 3 | chr3:15869115-15871059 REVERSE LENGTH=420;>AT5G22060.1 | Symbols: ATJ2, J2 | DNAJ homologue 2 | chr5:730	3	2	2	2	0	0	1	0	2	2	1	2	0	0	1	0	2	2	1	2	0	0	1	0	2	2	1	2	7.3	7.3	7.3	37.674	343	343;420;419	1	8	0	12.324	By matching	By matching	By matching	By matching	By MS/MS	By MS/MS
AT5G59370.2;AT5G59370.1;AT3G46520.1;AT2G42170.1;AT3G53750.1;AT2G37620.2;AT2G37620.1;AT5G09810.1;AT3G12110.1	AT5G59370.2;AT5G59370.1;AT3G46520.1;AT2G42170.1;AT3G53750.1;AT2G37620.2;AT2G37620.1;AT5G09810.1;AT3G12110.1	2;2;2;1;1;1;1;1;1	2;2;2;1;1;1;1;1;1	2;2;2;1;1;1;1;1;1	>AT5G59370.2 | Symbols: ACT4 | actin 4 | chr5:23950109-23951586 FORWARD LENGTH=377;>AT5G59370.1 | Symbols: ACT4 | actin 4 | chr5:23950109-23951586 FORWARD LENGTH=377;>AT3G46520.1 | Symbols: ACT12 | actin-12 | chr3:17128567-17129981 FORWARD LENGTH=377;>AT2G	9	2	2	2	2	2	2	2	2	2	2	2	2	2	2	2	2	2	2	2	2	2	2	2	2	2	2	2	7.4	7.4	7.4	41.778	377	377;377;377;329;377;377;377;377;377	1	16	0	20.98	By MS/MS	By MS/MS	By MS/MS	By MS/MS	By MS/MS	By MS/MS
AT3G46740.1	AT3G46740.1	3	3	3	>AT3G46740.1 | Symbols: TOC75-III, MAR1 | translocon at the outer envelope membrane of chloroplasts 75-III | chr3:17216104-17219296 REVERSE LENGTH=818	1	3	3	3	0	0	3	0	3	3	3	3	0	0	3	0	3	3	3	3	0	0	3	0	3	3	3	3	5	5	5	89.188	818	818	1	15	0	20.551	By matching	By matching	By MS/MS	By matching	By MS/MS	By matching
AT3G46780.1	AT3G46780.1	5	5	5	>AT3G46780.1 | Symbols: PTAC16 | plastid transcriptionally active 16 | chr3:17228766-17231021 FORWARD LENGTH=510	1	5	5	5	2	2	4	2	5	4	4	4	2	2	4	2	5	4	4	4	2	2	4	2	5	4	4	4	11.2	11.2	11.2	54.358	510	510	1	27	0	56.817	By matching	By matching	By MS/MS	By matching	By MS/MS	By MS/MS
AT3G47470.1	AT3G47470.1	2	2	2	>AT3G47470.1 | Symbols: LHCA4, CAB4 | light-harvesting chlorophyll-protein complex I subunit A4 | chr3:17493622-17494773 REVERSE LENGTH=251	1	2	2	2	0	0	0	0	1	1	2	2	0	0	0	0	1	1	2	2	0	0	0	0	1	1	2	2	10.4	10.4	10.4	27.733	251	251	1	6	0	67.856	By matching	By matching	By matching	By matching	By MS/MS	By MS/MS
AT3G47800.1	AT3G47800.1	10	10	10	>AT3G47800.1 | Symbols: | Galactose mutarotase-like superfamily protein | chr3:17634971-17636998 FORWARD LENGTH=358	1	10	10	10	2	7	9	1	10	9	8	8	2	7	9	1	10	9	8	8	2	7	9	1	10	9	8	8	41.1	41.1	41.1	39.714	358	358	1	70	0	323.31	By matching	By matching	By MS/MS	By matching	By MS/MS	By MS/MS
AT3G51800.3;AT3G51800.1;AT3G51800.2	AT3G51800.3;AT3G51800.1;AT3G51800.2	3;3;3	3;3;3	3;3;3	>AT3G51800.3 | Symbols: ATG2 | metallopeptidase M24 family protein | chr3:19211261-19213568 REVERSE LENGTH=385;>AT3G51800.1 | Symbols: ATG2, EBP1, ATEBP1 | metallopeptidase M24 family protein | chr3:19211261-19213568 REVERSE LENGTH=392;>AT3G51800.2 | Symbo	3	3	3	3	0	2	0	0	3	3	3	3	0	2	0	0	3	3	3	3	0	2	0	0	3	3	3	3	8.6	8.6	8.6	42.295	385	385;392;401	1	15	0	22.929	By matching	By matching	By matching	By matching	By MS/MS	By MS/MS
AT3G52150.2;AT3G52150.1	AT3G52150.2;AT3G52150.1	3;3	3;3	3;3	>AT3G52150.2 | Symbols: | RNA-binding (RRM/RBD/RNP motifs) family protein | chr3:19342074-19343090 FORWARD LENGTH=253;>AT3G52150.1 | Symbols: | RNA-binding (RRM/RBD/RNP motifs) family protein | chr3:19342074-19343090 FORWARD LENGTH=253	2	3	3	3	2	0	2	2	1	3	1	2	2	0	2	2	1	3	1	2	2	0	2	2	1	3	1	2	11.5	11.5	11.5	27.748	253	253;253	1	13	0	24.643	By matching	By matching	By matching	By matching	By matching	By MS/MS
AT3G52500.1	AT3G52500.1	7	7	7	>AT3G52500.1 | Symbols: | Eukaryotic aspartyl protease family protein | chr3:19465644-19467053 REVERSE LENGTH=469	1	7	7	7	1	1	5	0	7	5	4	3	1	1	5	0	7	5	4	3	1	1	5	0	7	5	4	3	17.9	17.9	17.9	51.004	469	469	1	31	0	119.28	By matching	By matching	By MS/MS	By matching	By MS/MS	By MS/MS
AT3G52930.1	AT3G52930.1	17	17	11	>AT3G52930.1 | Symbols: | Aldolase superfamily protein | chr3:19627383-19628874 REVERSE LENGTH=358	1	17	17	11	11	12	13	12	16	17	16	16	11	12	13	12	16	17	16	16	6	7	7	8	10	11	10	10	57.8	57.8	38	38.539	358	358	1	143	0	323.31	By MS/MS	By MS/MS	By MS/MS	By MS/MS	By MS/MS	By MS/MS
AT3G53420.2;AT3G53420.1	AT3G53420.2;AT3G53420.1	6;6	6;6	4;4	>AT3G53420.2 | Symbols: PIP2A, PIP2, PIP2;1 | plasma membrane intrinsic protein 2A | chr3:19803906-19805454 REVERSE LENGTH=287;>AT3G53420.1 | Symbols: PIP2A, PIP2, PIP2;1 | plasma membrane intrinsic protein 2A | chr3:19803906-19805454 REVERSE LENGTH=287	2	6	6	4	4	4	5	4	6	6	6	6	4	4	5	4	6	6	6	6	2	2	3	2	4	4	4	4	18.1	18.1	11.5	30.474	287	287;287	1	41	0	37.07	By MS/MS	By matching	By MS/MS	By MS/MS	By MS/MS	By MS/MS
AT3G53460.3;AT3G53460.2;AT3G53460.1;AT3G53460.4	AT3G53460.3;AT3G53460.2;AT3G53460.1;AT3G53460.4	7;7;7;7	4;4;4;4	4;4;4;4	>AT3G53460.3 | Symbols: CP29 | chloroplast RNA-binding protein 29 | chr3:19819738-19821423 REVERSE LENGTH=342;>AT3G53460.2 | Symbols: CP29 | chloroplast RNA-binding protein 29 | chr3:19819738-19821423 REVERSE LENGTH=342;>AT3G53460.1 | Symbols: CP29 | chlor	4	7	4	4	2	1	6	3	7	7	6	7	0	1	3	1	4	4	3	4	0	1	3	1	4	4	3	4	24	15.8	15.8	36.007	342	342;342;342;363	1	20	0	87.669	By matching	By MS/MS	By MS/MS	By MS/MS	By MS/MS	By MS/MS
AT3G54400.1	AT3G54400.1	8	8	8	>AT3G54400.1 | Symbols: | Eukaryotic aspartyl protease family protein | chr3:20140291-20142599 REVERSE LENGTH=425	1	8	8	8	7	8	8	6	8	8	8	5	7	8	8	6	8	8	8	5	7	8	8	6	8	8	8	5	23.5	23.5	23.5	45.475	425	425	1	70	0	212.32	By MS/MS	By MS/MS	By MS/MS	By MS/MS	By MS/MS	By MS/MS
AT3G55220.1;AT3G55200.1	AT3G55220.1;AT3G55200.1	4;4	4;4	4;4	>AT3G55220.1 | Symbols: | Cleavage and polyadenylation specificity factor (CPSF) A subunit protein | chr3:20467116-20470944 REVERSE LENGTH=1214;>AT3G55200.1 | Symbols: | Cleavage and polyadenylation specificity factor (CPSF) A subunit protein | chr3:2046	2	4	4	4	0	0	2	0	4	4	4	4	0	0	2	0	4	4	4	4	0	0	2	0	4	4	4	4	4.7	4.7	4.7	134.97	1214	1214;1214	1	21	0	43.471	By matching	By matching	By matching	By matching	By MS/MS	By MS/MS
AT3G55430.1	AT3G55430.1	4	4	4	>AT3G55430.1 | Symbols: | O-Glycosyl hydrolases family 17 protein | chr3:20549806-20552004 REVERSE LENGTH=449	1	4	4	4	0	2	3	0	4	4	3	1	0	2	3	0	4	4	3	1	0	2	3	0	4	4	3	1	10.9	10.9	10.9	48.442	449	449	1	17	0	22.942	By matching	By matching	By MS/MS	By matching	By MS/MS	By MS/MS
AT3G56940.1;AT3G56940.2	AT3G56940.1;AT3G56940.2	12;11	12;11	12;11	>AT3G56940.1 | Symbols: CRD1, CHL27, ACSF | dicarboxylate diiron protein, putative (Crd1) | chr3:21076594-21078269 FORWARD LENGTH=409;>AT3G56940.2 | Symbols: CRD1 | dicarboxylate diiron protein, putative (Crd1) | chr3:21076825-21078269 FORWARD LENGTH=332	2	12	12	12	2	4	9	2	12	11	12	10	2	4	9	2	12	11	12	10	2	4	9	2	12	11	12	10	31.1	31.1	31.1	47.63	409	409;332	1	62	0	112.5	By matching	By matching	By MS/MS	By matching	By MS/MS	By MS/MS
AT3G62020.2;AT3G62020.1	AT3G62020.2;AT3G62020.1	3;3	2;2	2;2	>AT3G62020.2 | Symbols: GLP10 | germin-like protein 10 | chr3:22971443-22972018 REVERSE LENGTH=191;>AT3G62020.1 | Symbols: GLP10 | germin-like protein 10 | chr3:22971443-22972192 REVERSE LENGTH=220	2	3	2	2	0	1	2	0	3	3	2	2	0	1	2	0	2	2	2	2	0	1	2	0	2	2	2	2	19.9	11.5	11.5	20.323	191	191;220	1	11	0	36.275	By matching	By matching	By MS/MS	By matching	By MS/MS	By MS/MS
AT3G62120.2;AT3G62120.1	AT3G62120.2;AT3G62120.1	7;7	7;7	7;7	>AT3G62120.2 | Symbols: | Class II aaRS and biotin synthetases superfamily protein | chr3:23001227-23003849 REVERSE LENGTH=530;>AT3G62120.1 | Symbols: | Class II aaRS and biotin synthetases superfamily protein | chr3:23001227-23003849 REVERSE LENGTH=530	2	7	7	7	0	0	5	0	7	6	5	5	0	0	5	0	7	6	5	5	0	0	5	0	7	6	5	5	17.7	17.7	17.7	60.755	530	530;530	1	34	0	99.94	By matching	By matching	By matching	By matching	By MS/MS	By MS/MS
AT3G63140.1	AT3G63140.1	13	13	13	>AT3G63140.1 | Symbols: CSP41A | chloroplast stem-loop binding protein of 41 kDa | chr3:23327006-23328620 REVERSE LENGTH=406	1	13	13	13	1	2	6	2	12	12	11	12	1	2	6	2	12	12	11	12	1	2	6	2	12	12	11	12	38.7	38.7	38.7	43.929	406	406	1	77	0	184.64	By matching	By matching	By MS/MS	By matching	By MS/MS	By MS/MS
AT4G00430.1;AT4G00430.2	AT4G00430.1;AT4G00430.2	3;2	3;2	1;1	>AT4G00430.1 | Symbols: TMP-C, PIP1;4, PIP1E | plasma membrane intrinsic protein 1;4 | chr4:186143-187531 REVERSE LENGTH=287;>AT4G00430.2 | Symbols: TMP-C, PIP1;4, PIP1E | plasma membrane intrinsic protein 1;4 | chr4:186569-187531 REVERSE LENGTH=219	2	3	3	1	2	2	2	2	3	3	3	2	2	2	2	2	3	3	3	2	0	0	0	0	1	1	1	0	11.8	11.8	5.2	30.692	287	287;219	1	27	0	19.284	By matching	By matching	By MS/MS	By matching	By MS/MS	By MS/MS
AT4G01050.1	AT4G01050.1	4	4	4	>AT4G01050.1 | Symbols: TROL | thylakoid rhodanese-like | chr4:455874-458175 FORWARD LENGTH=466	1	4	4	4	4	2	4	4	4	3	4	4	4	2	4	4	4	3	4	4	4	2	4	4	4	3	4	4	9.9	9.9	9.9	49.387	466	466	1	29	0	29.315	By MS/MS	By MS/MS	By MS/MS	By MS/MS	By MS/MS	By MS/MS
AT4G01130.1	AT4G01130.1	6	6	6	>AT4G01130.1 | Symbols: | GDSL-like Lipase/Acylhydrolase superfamily protein | chr4:485868-488007 FORWARD LENGTH=382	1	6	6	6	1	2	4	0	6	6	4	4	1	2	4	0	6	6	4	4	1	2	4	0	6	6	4	4	21.5	21.5	21.5	42.013	382	382	1	31	0	61.228	By matching	By matching	By MS/MS	By matching	By MS/MS	By MS/MS
AT4G02770.1;AT1G03130.1	AT4G02770.1;AT1G03130.1	5;4	5;4	5;4	>AT4G02770.1 | Symbols: PSAD-1 | photosystem I subunit D-1 | chr4:1229247-1229873 REVERSE LENGTH=208;>AT1G03130.1 | Symbols: PSAD-2 | photosystem I subunit D-2 | chr1:753528-754142 REVERSE LENGTH=204	2	5	5	5	4	1	5	4	5	5	5	4	4	1	5	4	5	5	5	4	4	1	5	4	5	5	5	4	24.5	24.5	24.5	22.598	208	208;204	1	33	0	33.86	By MS/MS	By matching	By MS/MS	By matching	By MS/MS	By MS/MS
AT4G04640.1	AT4G04640.1	5	5	5	>AT4G04640.1 | Symbols: ATPC1 | ATPase, F1 complex, gamma subunit protein | chr4:2350761-2351882 REVERSE LENGTH=373	1	5	5	5	1	4	5	0	5	5	5	5	1	4	5	0	5	5	5	5	1	4	5	0	5	5	5	5	16.4	16.4	16.4	40.911	373	373	1	30	0	65.51	By matching	By matching	By MS/MS	By matching	By MS/MS	By MS/MS
AT4G10340.1	AT4G10340.1	6	6	6	>AT4G10340.1 | Symbols: LHCB5 | light harvesting complex of photosystem II 5 | chr4:6408200-6409496 FORWARD LENGTH=280	1	6	6	6	2	1	5	2	6	6	6	5	2	1	5	2	6	6	6	5	2	1	5	2	6	6	6	5	28.2	28.2	28.2	30.156	280	280	1	34	0	142.82	By matching	By matching	By MS/MS	By matching	By MS/MS	By MS/MS
AT4G10750.1	AT4G10750.1	3	3	3	>AT4G10750.1 | Symbols: | Phosphoenolpyruvate carboxylase family protein | chr4:6618724-6619800 FORWARD LENGTH=358	1	3	3	3	0	0	2	0	3	3	2	3	0	0	2	0	3	3	2	3	0	0	2	0	3	3	2	3	11.2	11.2	11.2	38.404	358	358	1	13	0	19.022	By matching	By matching	By matching	By matching	By MS/MS	By MS/MS
AT4G11010.1;AT4G23900.1;AT4G23895.3	AT4G11010.1;AT4G23900.1;AT4G23895.3	4;2;2	4;2;2	4;2;2	>AT4G11010.1 | Symbols: NDPK3 | nucleoside diphosphate kinase 3 | chr4:6732780-6734298 REVERSE LENGTH=238;>AT4G23900.1 | Symbols: | Nucleoside diphosphate kinase family protein | chr4:12424505-12426318 FORWARD LENGTH=237;>AT4G23895.3 | Symbols: | Pleckst	3	4	4	4	3	4	4	3	4	4	4	4	3	4	4	3	4	4	4	4	3	4	4	3	4	4	4	4	16.4	16.4	16.4	25.734	238	238;237;467	1	36	0	31.612	By matching	By matching	By MS/MS	By matching	By MS/MS	By MS/MS
AT4G13340.1	AT4G13340.1	7	7	2	>AT4G13340.1 | Symbols: | Leucine-rich repeat (LRR) family protein | chr4:7758610-7760892 FORWARD LENGTH=760	1	7	7	2	1	6	7	0	6	6	6	4	1	6	7	0	6	6	6	4	0	2	2	0	2	2	2	2	10	10	3.3	82.245	760	760	1	36	0	54.084	By matching	By MS/MS	By MS/MS	By matching	By MS/MS	By MS/MS
AT4G19410.1;AT4G19410.2	AT4G19410.1;AT4G19410.2	20;19	20;19	16;15	>AT4G19410.1 | Symbols: | Pectinacetylesterase family protein | chr4:10582188-10584766 REVERSE LENGTH=391;>AT4G19410.2 | Symbols: | Pectinacetylesterase family protein | chr4:10581037-10584766 REVERSE LENGTH=517	2	20	20	16	6	14	20	9	20	19	15	14	6	14	20	9	20	19	15	14	3	10	16	6	16	15	11	10	68.3	68.3	55.2	42.125	391	391;517	1	151	0	323.31	By MS/MS	By MS/MS	By MS/MS	By MS/MS	By MS/MS	By MS/MS
AT4G20360.1;AT4G02930.1	AT4G20360.1	9;1	9;1	9;1	>AT4G20360.1 | Symbols: ATRAB8D, ATRABE1B, RABE1b | RAB GTPase homolog E1B | chr4:10990036-10991466 FORWARD LENGTH=476	2	9	9	9	3	4	7	3	7	9	7	7	3	4	7	3	7	9	7	7	3	4	7	3	7	9	7	7	25.6	25.6	25.6	51.63	476	476;454	1	56	0	261.05	By matching	By matching	By MS/MS	By matching	By MS/MS	By MS/MS
AT4G21150.2;AT4G21150.3;AT4G21150.1	AT4G21150.2;AT4G21150.3;AT4G21150.1	5;5;5	5;5;5	5;5;5	>AT4G21150.2 | Symbols: HAP6 | ribophorin II (RPN2) family protein | chr4:11278649-11283599 FORWARD LENGTH=678;>AT4G21150.3 | Symbols: HAP6 | ribophorin II (RPN2) family protein | chr4:11278646-11283599 FORWARD LENGTH=691;>AT4G21150.1 | Symbols: HAP6 | rib	3	5	5	5	0	0	3	0	5	5	3	4	0	0	3	0	5	5	3	4	0	0	3	0	5	5	3	4	10.6	10.6	10.6	73.266	678	678;691;691	1	20	0	43.573	By matching	By matching	By matching	By matching	By MS/MS	By MS/MS
AT4G21650.1	AT4G21650.1	2	2	2	>AT4G21650.1 | Symbols: | Subtilase family protein | chr4:11501314-11504656 REVERSE LENGTH=766	1	2	2	2	0	0	2	0	2	2	1	0	0	0	2	0	2	2	1	0	0	0	2	0	2	2	1	0	3.8	3.8	3.8	81.479	766	766	1	7	0	13.318	By matching	By matching	By MS/MS	By matching	By MS/MS	By matching
AT4G22010.1;AT4G28090.1	AT4G22010.1	5;1	4;1	3;0	>AT4G22010.1 | Symbols: sks4 | SKU5 similar 4 | chr4:11663429-11666463 FORWARD LENGTH=541	2	5	4	3	1	4	5	1	4	2	1	1	0	3	4	0	3	1	0	0	0	2	3	0	2	1	0	0	11.1	8.1	6.3	60.455	541	541;547	1	11	0	23.245	By matching	By matching	By MS/MS	By matching	By MS/MS	By matching
AT4G24350.1;AT4G24350.2	AT4G24350.1;AT4G24350.2	2;1	2;1	2;1	>AT4G24350.1 | Symbols: | Phosphorylase superfamily protein | chr4:12609637-12611328 FORWARD LENGTH=336;>AT4G24350.2 | Symbols: | Phosphorylase superfamily protein | chr4:12610060-12611328 FORWARD LENGTH=242	2	2	2	2	0	0	2	0	2	2	2	2	0	0	2	0	2	2	2	2	0	0	2	0	2	2	2	2	10.1	10.1	10.1	36.696	336	336;242	1	10	0	13.403	By matching	By matching	By matching	By matching	By MS/MS	By MS/MS
AT4G24770.1	AT4G24770.1	3	3	3	>AT4G24770.1 | Symbols: RBP31, ATRBP31, CP31, ATRBP33 | 31-kDa RNA binding protein | chr4:12766223-12767952 REVERSE LENGTH=329	1	3	3	3	1	1	2	0	3	3	3	3	1	1	2	0	3	3	3	3	1	1	2	0	3	3	3	3	10.9	10.9	10.9	35.787	329	329	1	20	0	152.01	By matching	By matching	By matching	By matching	By MS/MS	By MS/MS
AT4G24780.2;AT4G24780.1;AT1G67750.1;AT3G27400.1	AT4G24780.2;AT4G24780.1	5;5;1;1	5;5;1;1	5;5;1;1	>AT4G24780.2 | Symbols: | Pectin lyase-like superfamily protein | chr4:12770631-12772227 REVERSE LENGTH=408;>AT4G24780.1 | Symbols: | Pectin lyase-like superfamily protein | chr4:12770631-12772227 REVERSE LENGTH=408	4	5	5	5	0	0	4	0	5	5	4	3	0	0	4	0	5	5	4	3	0	0	4	0	5	5	4	3	15.7	15.7	15.7	45.013	408	408;408;408;412	1	21	0	48.717	By matching	By matching	By MS/MS	By matching	By MS/MS	By MS/MS
AT4G25550.1	AT4G25550.1	2	2	2	>AT4G25550.1 | Symbols: | Cleavage/polyadenylation specificity factor, 25kDa subunit | chr4:13048519-13050873 FORWARD LENGTH=200	1	2	2	2	0	0	0	0	2	2	2	1	0	0	0	0	2	2	2	1	0	0	0	0	2	2	2	1	14.5	14.5	14.5	22.829	200	200	1	7	0	14.069	By matching	By matching	By matching	By matching	By MS/MS	By MS/MS
AT4G25900.1	AT4G25900.1	9	9	9	>AT4G25900.1 | Symbols: | Galactose mutarotase-like superfamily protein | chr4:13161487-13163397 FORWARD LENGTH=318	1	9	9	9	0	3	4	0	8	9	7	6	0	3	4	0	8	9	7	6	0	3	4	0	8	9	7	6	35.2	35.2	35.2	36.251	318	318	1	45	0	130.25	By matching	By matching	By MS/MS	By matching	By MS/MS	By MS/MS
AT4G27440.2;AT4G27440.1;AT5G54190.1	AT4G27440.2;AT4G27440.1;AT5G54190.1	4;4;2	3;3;2	3;3;2	>AT4G27440.2 | Symbols: PORB | protochlorophyllide oxidoreductase B | chr4:13725648-13727107 FORWARD LENGTH=401;>AT4G27440.1 | Symbols: PORB | protochlorophyllide oxidoreductase B | chr4:13725648-13727107 FORWARD LENGTH=401;>AT5G54190.1 | Symbols: PORA | p	3	4	3	3	2	2	4	2	4	3	4	3	1	1	3	1	3	2	3	2	1	1	3	1	3	2	3	2	9.7	7.7	7.7	43.359	401	401;401;405	1	16	0	20.49	By matching	By matching	By matching	By matching	By MS/MS	By MS/MS
AT4G29010.1	AT4G29010.1	3	3	3	>AT4G29010.1 | Symbols: AIM1 | Enoyl-CoA hydratase/isomerase family | chr4:14297312-14302016 REVERSE LENGTH=721	1	3	3	3	1	1	3	1	2	2	2	2	1	1	3	1	2	2	2	2	1	1	3	1	2	2	2	2	3.6	3.6	3.6	77.857	721	721	1	14	0	16.638	By matching	By matching	By MS/MS	By matching	By matching	By matching
AT4G29060.2;AT4G29060.1	AT4G29060.2;AT4G29060.1	2;2	2;2	2;2	>AT4G29060.2 | Symbols: emb2726 | elongation factor Ts family protein | chr4:14317744-14321315 FORWARD LENGTH=709;>AT4G29060.1 | Symbols: emb2726 | elongation factor Ts family protein | chr4:14317744-14321315 FORWARD LENGTH=953	2	2	2	2	0	0	0	0	2	2	2	2	0	0	0	0	2	2	2	2	0	0	0	0	2	2	2	2	3.7	3.7	3.7	76.855	709	709;953	1	8	0	14.476	By matching	By matching	By matching	By matching	By MS/MS	By MS/MS
AT4G30610.1;AT2G24010.1	AT4G30610.1	10;1	10;1	10;1	>AT4G30610.1 | Symbols: BRS1, SCPL24 | alpha/beta-Hydrolases superfamily protein | chr4:14944219-14948391 FORWARD LENGTH=465	2	10	10	10	1	2	9	1	9	10	8	7	1	2	9	1	9	10	8	7	1	2	9	1	9	10	8	7	24.7	24.7	24.7	52.844	465	465;440	1	53	0	289.08	By matching	By matching	By MS/MS	By matching	By MS/MS	By MS/MS
AT4G32720.2;AT4G32720.1	AT4G32720.2;AT4G32720.1	2;2	2;2	2;2	>AT4G32720.2 | Symbols: AtLa1, La1 | La protein 1 | chr4:15787313-15789498 FORWARD LENGTH=404;>AT4G32720.1 | Symbols: AtLa1, La1 | La protein 1 | chr4:15787313-15789683 FORWARD LENGTH=433	2	2	2	2	0	0	0	0	2	2	2	2	0	0	0	0	2	2	2	2	0	0	0	0	2	2	2	2	6.4	6.4	6.4	44.968	404	404;433	1	8	0	12.315	By matching	By matching	By matching	By matching	By MS/MS	By MS/MS
AT4G33220.1;AT3G43270.1	AT4G33220.1;AT3G43270.1	3;2	2;2	2;2	>AT4G33220.1 | Symbols: PME44, ATPME44 | pectin methylesterase 44 | chr4:16022506-16026130 FORWARD LENGTH=525;>AT3G43270.1 | Symbols: | Plant invertase/pectin methylesterase inhibitor superfamily | chr3:15222402-15225124 REVERSE LENGTH=527	2	3	2	2	2	1	2	3	3	3	3	3	1	0	1	2	2	2	2	2	1	0	1	2	2	2	2	2	5.5	4.2	4.2	58.499	525	525;527	1	12	0	12.415	By matching	By matching	By MS/MS	By matching	By MS/MS	By MS/MS
AT4G33350.2;AT4G33350.1	AT4G33350.2;AT4G33350.1	2;2	2;2	2;2	>AT4G33350.2 | Symbols: | Tic22-like family protein | chr4:16064638-16066715 REVERSE LENGTH=242;>AT4G33350.1 | Symbols: | Tic22-like family protein | chr4:16064638-16066715 REVERSE LENGTH=268	2	2	2	2	1	1	2	0	2	2	2	2	1	1	2	0	2	2	2	2	1	1	2	0	2	2	2	2	10.3	10.3	10.3	26.973	242	242;268	1	12	0	12.299	By matching	By matching	By MS/MS	By matching	By MS/MS	By MS/MS
AT4G34110.1;AT1G22760.1;AT2G23350.1;AT1G49760.2;AT1G49760.1	AT4G34110.1	4;1;1;1;1	4;1;1;1;1	4;1;1;1;1	>AT4G34110.1 | Symbols: PAB2, PABP2, ATPAB2 | poly(A) binding protein 2 | chr4:16336732-16339892 FORWARD LENGTH=629	5	4	4	4	0	1	1	0	3	3	4	4	0	1	1	0	3	3	4	4	0	1	1	0	3	3	4	4	9.4	9.4	9.4	68.672	629	629;660;662;671;671	1	16	0	34.799	By matching	By matching	By matching	By matching	By MS/MS	By matching
AT4G34200.1;AT1G17745.1;AT1G17745.2	AT4G34200.1	3;1;1	3;1;1	3;1;1	>AT4G34200.1 | Symbols: EDA9 | D-3-phosphoglycerate dehydrogenase | chr4:16374041-16376561 REVERSE LENGTH=603	3	3	3	3	0	0	1	0	3	2	2	2	0	0	1	0	3	2	2	2	0	0	1	0	3	2	2	2	5.5	5.5	5.5	63.324	603	603;624;651	1	10	0	21.052	By matching	By matching	By matching	By matching	By MS/MS	By MS/MS
AT4G34260.1	AT4G34260.1	5	5	5	>AT4G34260.1 | Symbols: FUC95A | 1,2-alpha-L-fucosidases | chr4:16398130-16401591 FORWARD LENGTH=843	1	5	5	5	1	2	3	0	5	5	1	3	1	2	3	0	5	5	1	3	1	2	3	0	5	5	1	3	7.8	7.8	7.8	93.724	843	843	1	21	0	35.2	By matching	By matching	By MS/MS	By matching	By MS/MS	By MS/MS
AT4G35000.1;AT4G35970.1	AT4G35000.1	5;1	5;1	5;1	>AT4G35000.1 | Symbols: APX3 | ascorbate peroxidase 3 | chr4:16665007-16667541 REVERSE LENGTH=287	2	5	5	5	1	1	1	1	3	4	3	5	1	1	1	1	3	4	3	5	1	1	1	1	3	4	3	5	22.6	22.6	22.6	31.571	287	287;279	1	19	0	33.911	By matching	By matching	By matching	By matching	By MS/MS	By MS/MS
AT4G35090.2;AT4G35090.1	AT4G35090.2;AT4G35090.1	3;3	3;3	1;1	>AT4G35090.2 | Symbols: CAT2 | catalase 2 | chr4:16701105-16703215 REVERSE LENGTH=474;>AT4G35090.1 | Symbols: CAT2 | catalase 2 | chr4:16700937-16703215 REVERSE LENGTH=492	2	3	3	1	0	2	3	0	3	3	2	1	0	2	3	0	3	3	2	1	0	0	1	0	1	1	0	0	8	8	2.7	54.994	474	474;492	1	14	0	25.521	By matching	By matching	By MS/MS	By matching	By MS/MS	By MS/MS
AT4G35100.2;AT4G35100.1	AT4G35100.2;AT4G35100.1	3;3	3;3	2;2	>AT4G35100.2 | Symbols: PIP3 | plasma membrane intrinsic protein 3 | chr4:16708672-16709958 FORWARD LENGTH=280;>AT4G35100.1 | Symbols: PIP3, PIP3A, PIP2;7, SIMIP | plasma membrane intrinsic protein 3 | chr4:16708672-16709958 FORWARD LENGTH=280	2	3	3	2	2	2	3	2	3	3	3	3	2	2	3	2	3	3	3	3	1	1	2	1	2	2	2	2	17.1	17.1	12.9	29.742	280	280;280	1	23	0	77.018	By MS/MS	By MS/MS	By MS/MS	By MS/MS	By MS/MS	By MS/MS
AT4G35630.1	AT4G35630.1	6	6	2	>AT4G35630.1 | Symbols: PSAT | phosphoserine aminotransferase | chr4:16904205-16905497 FORWARD LENGTH=430	1	6	6	2	0	1	3	0	6	6	6	6	0	1	3	0	6	6	6	6	0	0	1	0	2	2	2	2	18.8	18.8	7.4	47.359	430	430	1	28	0	68.617	By matching	By matching	By matching	By matching	By MS/MS	By MS/MS
AT4G37800.1;AT5G65730.1	AT4G37800.1	4;1	4;1	4;1	>AT4G37800.1 | Symbols: XTH7 | xyloglucan endotransglucosylase/hydrolase 7 | chr4:17775703-17777372 REVERSE LENGTH=293	2	4	4	4	2	3	4	2	4	3	3	4	2	3	4	2	4	3	3	4	2	3	4	2	4	3	3	4	17.1	17.1	17.1	33.681	293	293;292	1	25	0	28.252	By matching	By MS/MS	By MS/MS	By matching	By MS/MS	By MS/MS
AT4G37930.1;AT5G26780.1;AT5G26780.3;AT5G26780.2	AT4G37930.1	9;2;2;2	9;2;2;2	9;2;2;2	>AT4G37930.1 | Symbols: SHM1, STM, SHMT1 | serine transhydroxymethyltransferase 1 | chr4:17831891-17834742 REVERSE LENGTH=517	4	9	9	9	0	1	6	0	9	9	7	9	0	1	6	0	9	9	7	9	0	1	6	0	9	9	7	9	21.3	21.3	21.3	57.4	517	517;517;533;533	1	45	0	63.371	By matching	By matching	By MS/MS	By matching	By MS/MS	By MS/MS
AT4G38970.1;AT4G38970.2	AT4G38970.1;AT4G38970.2	13;10	13;10	7;6	>AT4G38970.1 | Symbols: FBA2 | fructose-bisphosphate aldolase 2 | chr4:18163714-18165659 REVERSE LENGTH=398;>AT4G38970.2 | Symbols: FBA2 | fructose-bisphosphate aldolase 2 | chr4:18163769-18165659 REVERSE LENGTH=381	2	13	13	7	13	12	12	10	12	13	13	11	13	12	12	10	12	13	13	11	7	6	6	5	7	7	7	6	42.2	42.2	27.6	42.987	398	398;381	1	120	0	320.73	By MS/MS	By MS/MS	By MS/MS	By MS/MS	By MS/MS	By MS/MS
AT4G39640.2;AT4G39640.1	AT4G39640.2;AT4G39640.1	4;4	4;4	4;4	>AT4G39640.2 | Symbols: GGT1 | gamma-glutamyl transpeptidase 1 | chr4:18400608-18402861 FORWARD LENGTH=572;>AT4G39640.1 | Symbols: GGT1 | gamma-glutamyl transpeptidase 1 | chr4:18400608-18402861 FORWARD LENGTH=572	2	4	4	4	0	0	3	0	4	4	3	3	0	0	3	0	4	4	3	3	0	0	3	0	4	4	3	3	10.8	10.8	10.8	61.189	572	572;572	1	23	0	129.8	By matching	By matching	By MS/MS	By matching	By MS/MS	By MS/MS
AT4G39960.1	AT4G39960.1	4	4	2	>AT4G39960.1 | Symbols: | Molecular chaperone Hsp40/DnaJ family protein | chr4:18534194-18536320 FORWARD LENGTH=447	1	4	4	2	0	0	0	0	4	3	3	2	0	0	0	0	4	3	3	2	0	0	0	0	2	2	2	1	11.4	11.4	5.8	48.031	447	447	1	12	0	24.105	By matching	By matching	By matching	By matching	By MS/MS	By MS/MS
AT5G01530.1	AT5G01530.1	2	2	2	>AT5G01530.1 | Symbols: LHCB4.1 | light harvesting complex photosystem II | chr5:209084-210243 FORWARD LENGTH=290	1	2	2	2	1	1	2	2	2	2	2	2	1	1	2	2	2	2	2	2	1	1	2	2	2	2	2	2	6.9	6.9	6.9	31.139	290	290	1	14	0	15.269	By matching	By matching	By MS/MS	By matching	By matching	By MS/MS
AT5G03350.1	AT5G03350.1	8	7	7	>AT5G03350.1 | Symbols: | Legume lectin family protein | chr5:815804-816628 REVERSE LENGTH=274	1	8	7	7	2	7	8	5	8	8	7	8	1	6	7	4	7	7	6	7	1	6	7	4	7	7	6	7	43.1	40.1	40.1	30.162	274	274	1	55	0	323.31	By matching	By MS/MS	By MS/MS	By MS/MS	By MS/MS	By MS/MS
AT5G03740.1	AT5G03740.1	2	2	2	>AT5G03740.1 | Symbols: HD2C, HDT3 | histone deacetylase 2C | chr5:981994-983961 FORWARD LENGTH=294	1	2	2	2	0	0	1	0	2	2	1	2	0	0	1	0	2	2	1	2	0	0	1	0	2	2	1	2	7.5	7.5	7.5	31.83	294	294	1	8	0	14.875	By matching	By matching	By matching	By matching	By MS/MS	By matching
AT5G07350.1;AT5G07350.2	AT5G07350.1;AT5G07350.2	9;9	6;6	6;6	>AT5G07350.1 | Symbols: Tudor1, AtTudor1, TSN1 | TUDOR-SN protein 1 | chr5:2320344-2324892 REVERSE LENGTH=991;>AT5G07350.2 | Symbols: Tudor1, AtTudor1, TSN1 | TUDOR-SN protein 1 | chr5:2320021-2324892 REVERSE LENGTH=1007	2	9	6	6	2	2	2	1	7	8	7	6	1	1	1	1	5	5	5	5	1	1	1	1	5	5	5	5	10.9	7.5	7.5	108.23	991	991;1007	1	24	0	68.352	By matching	By matching	By matching	By matching	By MS/MS	By MS/MS
AT5G09440.1	AT5G09440.1	6	6	5	>AT5G09440.1 | Symbols: EXL4 | EXORDIUM like 4 | chr5:2938397-2939233 FORWARD LENGTH=278	1	6	6	5	0	4	5	1	6	6	5	5	0	4	5	1	6	6	5	5	0	3	4	1	5	5	4	4	21.9	21.9	18.7	29.474	278	278	1	32	0	49.369	By matching	By MS/MS	By MS/MS	By matching	By MS/MS	By MS/MS
AT5G11420.1	AT5G11420.1	11	6	5	>AT5G11420.1 | Symbols: | Protein of unknown function, DUF642 | chr5:3644655-3646991 FORWARD LENGTH=366	1	11	6	5	5	6	10	7	11	11	8	11	1	2	5	2	6	6	3	6	1	2	5	2	5	5	3	5	33.3	16.7	14.2	39.64	366	366	1	39	0	39.492	By matching	By MS/MS	By MS/MS	By matching	By MS/MS	By MS/MS
AT5G16590.1	AT5G16590.1	3	2	2	>AT5G16590.1 | Symbols: LRR1 | Leucine-rich repeat protein kinase family protein | chr5:5431862-5433921 FORWARD LENGTH=625	1	3	2	2	0	0	1	0	2	3	1	1	0	0	1	0	2	2	1	1	0	0	1	0	2	2	1	1	6.2	4.3	4.3	67.463	625	625	1	7	0	12.353	By matching	By matching	By matching	By matching	By MS/MS	By MS/MS
AT5G17170.1;AT5G17170.2	AT5G17170.1;AT5G17170.2	6;4	6;4	6;4	>AT5G17170.1 | Symbols: ENH1 | rubredoxin family protein | chr5:5649335-5650975 FORWARD LENGTH=271;>AT5G17170.2 | Symbols: ENH1 | rubredoxin family protein | chr5:5649335-5650835 FORWARD LENGTH=224	2	6	6	6	2	3	3	3	5	6	6	5	2	3	3	3	5	6	6	5	2	3	3	3	5	6	6	5	39.1	39.1	39.1	28.458	271	271;224	1	42	0	257.17	By MS/MS	By MS/MS	By MS/MS	By matching	By MS/MS	By MS/MS
AT5G20630.1	AT5G20630.1	3	3	3	>AT5G20630.1 | Symbols: GLP3, GLP3A, GLP3B, ATGER3, GER3 | germin 3 | chr5:6975315-6975950 REVERSE LENGTH=211	1	3	3	3	1	1	3	1	3	3	2	1	1	1	3	1	3	3	2	1	1	1	3	1	3	3	2	1	25.1	25.1	25.1	21.836	211	211	1	18	0	23.957	By matching	By matching	By MS/MS	By matching	By MS/MS	By MS/MS
AT5G20950.2;AT5G20950.1;AT3G47050.2;AT3G47000.1;AT3G47050.1	AT5G20950.2;AT5G20950.1	4;4;1;1;1	4;4;1;1;1	4;4;1;1;1	>AT5G20950.2 | Symbols: | Glycosyl hydrolase family protein | chr5:7107609-7110775 REVERSE LENGTH=624;>AT5G20950.1 | Symbols: | Glycosyl hydrolase family protein | chr5:7107609-7110775 REVERSE LENGTH=624	5	4	4	4	0	2	3	0	3	3	1	1	0	2	3	0	3	3	1	1	0	2	3	0	3	3	1	1	10.4	10.4	10.4	67.926	624	624;624;447;608;612	1	17	0	66.171	By matching	By MS/MS	By MS/MS	By matching	By MS/MS	By MS/MS
AT5G21105.3;AT5G21105.1;AT5G21105.2	AT5G21105.3;AT5G21105.1;AT5G21105.2	5;5;4	5;5;4	5;5;4	>AT5G21105.3 | Symbols: | Plant L-ascorbate oxidase | chr5:7172727-7177657 FORWARD LENGTH=543;>AT5G21105.1 | Symbols: | Plant L-ascorbate oxidase | chr5:7172727-7177409 FORWARD LENGTH=588;>AT5G21105.2 | Symbols: | Plant L-ascorbate oxidase | chr5:717432	3	5	5	5	4	4	3	4	5	4	4	5	4	4	3	4	5	4	4	5	4	4	3	4	5	4	4	5	13.4	13.4	13.4	60.795	543	543;588;397	1	33	0	143.37	By MS/MS	By MS/MS	By MS/MS	By MS/MS	By MS/MS	By MS/MS
AT5G22650.2;AT5G22650.1	AT5G22650.2;AT5G22650.1	2;2	2;2	2;2	>AT5G22650.2 | Symbols: HD2B, HDT02, HDT2, ATHD2B, HDA4, HD2 | histone deacetylase 2B | chr5:7534120-7536054 FORWARD LENGTH=305;>AT5G22650.1 | Symbols: HD2B, HDT02, HDT2, ATHD2B, HDA4, HD2, ATHD2 | histone deacetylase 2B | chr5:7534120-7536054 FORWARD LENG	2	2	2	2	0	0	1	0	2	1	1	2	0	0	1	0	2	1	1	2	0	0	1	0	2	1	1	2	6.6	6.6	6.6	32.218	305	305;306	1	7	0	12.021	By matching	By matching	By matching	By matching	By MS/MS	By matching
AT5G23060.1	AT5G23060.1	6	6	6	>AT5G23060.1 | Symbols: CaS | calcium sensing receptor | chr5:7736760-7738412 REVERSE LENGTH=387	1	6	6	6	1	1	6	1	6	5	3	3	1	1	6	1	6	5	3	3	1	1	6	1	6	5	3	3	24.5	24.5	24.5	41.285	387	387	1	26	0	71.819	By matching	By matching	By MS/MS	By matching	By MS/MS	By MS/MS
AT5G23210.4;AT5G23210.2;AT5G23210.3;AT5G23210.1	AT5G23210.4;AT5G23210.2;AT5G23210.3;AT5G23210.1	7;7;7;7	7;7;7;7	7;7;7;7	>AT5G23210.4 | Symbols: SCPL34 | serine carboxypeptidase-like 34 | chr5:7811625-7814608 FORWARD LENGTH=363;>AT5G23210.2 | Symbols: SCPL34 | serine carboxypeptidase-like 34 | chr5:7811625-7814837 FORWARD LENGTH=403;>AT5G23210.3 | Symbols: SCPL34 | serine ca	4	7	7	7	0	0	3	0	7	7	5	6	0	0	3	0	7	7	5	6	0	0	3	0	7	7	5	6	25.3	25.3	25.3	41.219	363	363;403;459;499	1	32	0	118.68	By matching	By matching	By matching	By matching	By MS/MS	By MS/MS
AT5G23400.1	AT5G23400.1	9	9	9	>AT5G23400.1 | Symbols: | Leucine-rich repeat (LRR) family protein | chr5:7880603-7882372 FORWARD LENGTH=589	1	9	9	9	0	2	9	0	7	4	3	3	0	2	9	0	7	4	3	3	0	2	9	0	7	4	3	3	19.9	19.9	19.9	64.017	589	589	1	28	0	89.25	By matching	By matching	By MS/MS	By matching	By MS/MS	By matching
AT5G24490.1	AT5G24490.1	2	2	2	>AT5G24490.1 | Symbols: | 30S ribosomal protein, putative | chr5:8365690-8367178 FORWARD LENGTH=308	1	2	2	2	0	0	1	0	2	2	2	2	0	0	1	0	2	2	2	2	0	0	1	0	2	2	2	2	7.5	7.5	7.5	34.856	308	308	1	9	0	30.173	By matching	By matching	By matching	By matching	By MS/MS	By MS/MS
AT5G25460.1	AT5G25460.1	12	12	7	>AT5G25460.1 | Symbols: | Protein of unknown function, DUF642 | chr5:8863430-8865394 FORWARD LENGTH=369	1	12	12	7	6	7	12	7	12	10	10	9	6	7	12	7	12	10	10	9	2	3	7	2	7	5	5	4	38.2	38.2	21.7	39.978	369	369	1	104	0	323.31	By MS/MS	By MS/MS	By MS/MS	By MS/MS	By MS/MS	By MS/MS
AT5G25980.2;AT5G25980.3;AT5G25980.1;AT5G48375.1	AT5G25980.2;AT5G25980.3;AT5G25980.1	12;11;11;2	12;11;11;2	11;10;10;2	>AT5G25980.2 | Symbols: TGG2, BGLU37 | glucoside glucohydrolase 2 | chr5:9072730-9075477 FORWARD LENGTH=547;>AT5G25980.3 | Symbols: TGG2, BGLU37 | glucoside glucohydrolase 2 | chr5:9072730-9075143 FORWARD LENGTH=467;>AT5G25980.1 | Symbols: TGG2, BGLU37 | g	4	12	12	11	2	5	8	2	12	12	11	11	2	5	8	2	12	12	11	11	1	4	7	1	11	11	10	10	22.9	22.9	20.8	62.731	547	547;467;467;439	1	76	0	184.52	By matching	By MS/MS	By MS/MS	By matching	By MS/MS	By MS/MS
AT5G26000.2;AT5G26000.1	AT5G26000.2;AT5G26000.1	5;5	4;4	4;4	>AT5G26000.2 | Symbols: TGG1, BGLU38 | thioglucoside glucohydrolase 1 | chr5:9080009-9082347 REVERSE LENGTH=456;>AT5G26000.1 | Symbols: TGG1, BGLU38 | thioglucoside glucohydrolase 1 | chr5:9079678-9082347 REVERSE LENGTH=541	2	5	4	4	4	4	4	3	5	4	3	3	3	3	3	2	4	3	2	2	3	3	3	2	4	3	2	2	13.6	11.2	11.2	51.481	456	456;541	1	22	0	43.038	By MS/MS	By MS/MS	By MS/MS	By MS/MS	By MS/MS	By MS/MS
AT5G26830.1	AT5G26830.1	3	3	3	>AT5G26830.1 | Symbols: | Threonyl-tRNA synthetase | chr5:9437351-9441568 FORWARD LENGTH=709	1	3	3	3	0	0	0	0	3	2	2	2	0	0	0	0	3	2	2	2	0	0	0	0	3	2	2	2	3.2	3.2	3.2	80.935	709	709	1	9	0	20.7	By matching	By matching	By matching	By matching	By MS/MS	By MS/MS
AT5G28540.1;AT5G42020.2;AT5G42020.1	AT5G28540.1;AT5G42020.2;AT5G42020.1	16;15;15	16;15;15	13;13;13	>AT5G28540.1 | Symbols: BIP1 | heat shock protein 70 (Hsp 70) family protein | chr5:10540665-10543274 REVERSE LENGTH=669;>AT5G42020.2 | Symbols: BIP | Heat shock protein 70 (Hsp 70) family protein | chr5:16807697-16810480 REVERSE LENGTH=613;>AT5G42020.1 |	3	16	16	13	6	10	13	5	14	16	13	12	6	10	13	5	14	16	13	12	4	8	10	3	12	13	11	10	28	28	22.7	73.628	669	669;613;668	1	103	0	150.06	By MS/MS	By MS/MS	By MS/MS	By MS/MS	By MS/MS	By MS/MS
AT5G30510.1	AT5G30510.1	5	5	5	>AT5G30510.1 | Symbols: RPS1, ARRPS1 | ribosomal protein S1 | chr5:11619262-11621223 REVERSE LENGTH=416	1	5	5	5	0	0	1	0	5	5	5	5	0	0	1	0	5	5	5	5	0	0	1	0	5	5	5	5	14.2	14.2	14.2	45.11	416	416	1	21	0	34.38	By matching	By matching	By matching	By matching	By MS/MS	By MS/MS
AT5G38420.1;AT5G38410.1;AT5G38410.3;AT5G38410.2;AT5G38430.1	AT5G38420.1;AT5G38410.1;AT5G38410.3;AT5G38410.2;AT5G38430.1	4;4;4;3;3	3;3;3;2;2	3;3;3;2;2	>AT5G38420.1 | Symbols: | Ribulose bisphosphate carboxylase (small chain) family protein | chr5:15381203-15381978 REVERSE LENGTH=181;>AT5G38410.1 | Symbols: | Ribulose bisphosphate carboxylase (small chain) family protein | chr5:15377501-15378306 REVERSE	5	4	3	3	4	2	4	3	4	4	4	4	3	1	3	2	3	3	3	3	3	1	3	2	3	3	3	3	28.2	20.4	20.4	20.35	181	181;181;186;174;181	1	25	0	22.132	By matching	By matching	By MS/MS	By matching	By MS/MS	By MS/MS
AT5G40490.1	AT5G40490.1	3	3	3	>AT5G40490.1 | Symbols: | RNA-binding (RRM/RBD/RNP motifs) family protein | chr5:16225483-16227423 FORWARD LENGTH=423	1	3	3	3	0	0	0	0	3	3	3	1	0	0	0	0	3	3	3	1	0	0	0	0	3	3	3	1	12.5	12.5	12.5	42.407	423	423	1	10	0	20.099	By matching	By matching	By matching	By matching	By MS/MS	By MS/MS
AT5G44020.1	AT5G44020.1	9	9	8	>AT5G44020.1 | Symbols: | HAD superfamily, subfamily IIIB acid phosphatase | chr5:17712433-17714046 FORWARD LENGTH=272	1	9	9	8	2	4	9	4	8	9	7	8	2	4	9	4	8	9	7	8	1	3	8	3	7	8	6	7	36.8	36.8	34.2	31.056	272	272	1	66	0	166.3	By matching	By matching	By MS/MS	By matching	By MS/MS	By MS/MS
AT5G44120.1;AT5G44120.2;AT5G44120.3	AT5G44120.1;AT5G44120.2;AT5G44120.3	2;2;2	2;2;2	2;2;2	>AT5G44120.1 | Symbols: CRA1, ATCRA1, CRU1 | RmlC-like cupins superfamily protein | chr5:17756460-17757432 REVERSE LENGTH=285;>AT5G44120.2 | Symbols: CRA1, ATCRA1, CRU1 | RmlC-like cupins superfamily protein | chr5:17756460-17757811 REVERSE LENGTH=368;>AT5	3	2	2	2	0	0	1	0	2	2	2	1	0	0	1	0	2	2	2	1	0	0	1	0	2	2	2	1	7	7	7	31.645	285	285;368;472	1	8	0	11.866	By matching	By matching	By matching	By matching	By MS/MS	By MS/MS
AT5G45280.2;AT5G45280.1	AT5G45280.2;AT5G45280.1	7;5	3;1	3;1	>AT5G45280.2 | Symbols: | Pectinacetylesterase family protein | chr5:18346862-18349488 FORWARD LENGTH=391;>AT5G45280.1 | Symbols: | Pectinacetylesterase family protein | chr5:18346862-18349432 FORWARD LENGTH=370	2	7	3	3	4	6	7	3	7	7	5	6	1	2	3	0	3	3	1	2	1	2	3	0	3	3	1	2	22.8	9.7	9.7	42.009	391	391;370	1	15	0	23.278	By matching	By MS/MS	By MS/MS	By matching	By MS/MS	By MS/MS
AT5G46070.1	AT5G46070.1	3	3	3	>AT5G46070.1 | Symbols: | Guanylate-binding family protein | chr5:18683468-18688397 FORWARD LENGTH=1082	1	3	3	3	0	0	2	0	3	3	2	2	0	0	2	0	3	3	2	2	0	0	2	0	3	3	2	2	3.2	3.2	3.2	122.78	1082	1082	1	12	0	19.236	By matching	By matching	By MS/MS	By matching	By MS/MS	By MS/MS
AT5G49360.1	AT5G49360.1	9	9	9	>AT5G49360.1 | Symbols: BXL1, ATBXL1 | beta-xylosidase 1 | chr5:20012179-20016659 REVERSE LENGTH=774	1	9	9	9	7	5	9	4	6	5	4	4	7	5	9	4	6	5	4	4	7	5	9	4	6	5	4	4	17.3	17.3	17.3	83.523	774	774	1	46	0	108.22	By MS/MS	By MS/MS	By MS/MS	By matching	By MS/MS	By MS/MS
AT5G50920.1;AT3G48870.2;AT3G48870.1	AT5G50920.1;AT3G48870.2;AT3G48870.1	6;5;5	6;5;5	6;5;5	>AT5G50920.1 | Symbols: CLPC, ATHSP93-V, HSP93-V, DCA1, CLPC1 | CLPC homologue 1 | chr5:20715710-20719800 REVERSE LENGTH=929;>AT3G48870.2 | Symbols: HSP93-III | Clp ATPase | chr3:18122363-18125915 REVERSE LENGTH=921;>AT3G48870.1 | Symbols: ATCLPC, ATHSP93-	3	6	6	6	1	2	4	1	6	6	6	4	1	2	4	1	6	6	6	4	1	2	4	1	6	6	6	4	7.4	7.4	7.4	103.45	929	929;921;952	1	30	0	40.655	By matching	By matching	By MS/MS	By matching	By MS/MS	By MS/MS
AT5G61780.1	AT5G61780.1	10	10	7	>AT5G61780.1 | Symbols: Tudor2, AtTudor2, TSN2 | TUDOR-SN protein 2 | chr5:24822012-24826641 FORWARD LENGTH=985	1	10	10	7	3	3	3	1	8	9	8	7	3	3	3	1	8	9	8	7	2	2	2	1	6	6	6	6	14	14	10.6	107.74	985	985	1	47	0	90.865	By matching	By matching	By matching	By MS/MS	By MS/MS	By MS/MS
AT5G62350.1	AT5G62350.1	3	3	3	>AT5G62350.1 | Symbols: | Plant invertase/pectin methylesterase inhibitor superfamily protein | chr5:25037504-25038112 FORWARD LENGTH=202	1	3	3	3	0	1	3	0	3	3	2	1	0	1	3	0	3	3	2	1	0	1	3	0	3	3	2	1	24.8	24.8	24.8	22.179	202	202	1	17	0	29.591	By matching	By MS/MS	By MS/MS	By matching	By MS/MS	By MS/MS
AT5G63800.1	AT5G63800.1	8	8	8	>AT5G63800.1 | Symbols: MUM2, BGAL6 | Glycosyl hydrolase family 35 protein | chr5:25530323-25535678 FORWARD LENGTH=718	1	8	8	8	4	6	4	1	7	6	6	5	4	6	4	1	7	6	6	5	4	6	4	1	7	6	6	5	14.9	14.9	14.9	79.758	718	718	1	39	0	51.875	By MS/MS	By MS/MS	By MS/MS	By matching	By MS/MS	By MS/MS
AT5G63810.1	AT5G63810.1	5	5	5	>AT5G63810.1 | Symbols: BGAL10 | beta-galactosidase 10 | chr5:25537242-25541315 FORWARD LENGTH=741	1	5	5	5	0	1	2	0	5	5	4	5	0	1	2	0	5	5	4	5	0	1	2	0	5	5	4	5	10.7	10.7	10.7	83.101	741	741	1	22	0	192.39	By matching	By matching	By MS/MS	By matching	By MS/MS	By MS/MS
AT5G64040.1;AT5G64040.2	AT5G64040.1;AT5G64040.2	3;3	3;3	3;3	>AT5G64040.1 | Symbols: PSAN | photosystem I reaction center subunit PSI-N, chloroplast, putative / PSI-N, putative (PSAN) | chr5:25628724-25629409 REVERSE LENGTH=171;>AT5G64040.2 | Symbols: PSAN | photosystem I reaction center subunit PSI-N, chloroplast,	2	3	3	3	0	0	2	1	3	1	1	2	0	0	2	1	3	1	1	2	0	0	2	1	3	1	1	2	19.3	19.3	19.3	18.429	171	171;181	1	10	0	17.002	By matching	By matching	By matching	By matching	By MS/MS	By matching
AT5G64260.1	AT5G64260.1	3	2	2	>AT5G64260.1 | Symbols: EXL2 | EXORDIUM like 2 | chr5:25703980-25704897 FORWARD LENGTH=305	1	3	2	2	0	2	3	1	3	2	3	3	0	1	2	1	2	1	2	2	0	1	2	1	2	1	2	2	11.1	8.2	8.2	32.674	305	305	1	11	0	49.536	By matching	By matching	By MS/MS	By matching	By MS/MS	By matching
AT5G66190.1;AT5G66190.2	AT5G66190.1;AT5G66190.2	10;8	10;8	9;7	>AT5G66190.1 | Symbols: ATLFNR1, FNR1 | ferredoxin-NADP(+)-oxidoreductase 1 | chr5:26451203-26453012 REVERSE LENGTH=360;>AT5G66190.2 | Symbols: ATLFNR1 | ferredoxin-NADP(+)-oxidoreductase 1 | chr5:26451203-26452616 REVERSE LENGTH=262	2	10	10	9	9	8	10	9	9	9	8	8	9	8	10	9	9	9	8	8	8	7	9	8	8	8	7	7	39.7	39.7	36.7	40.326	360	360;262	1	77	0	260.62	By MS/MS	By MS/MS	By MS/MS	By MS/MS	By MS/MS	By MS/MS
AT5G66570.1	AT5G66570.1	6	6	2	>AT5G66570.1 | Symbols: PSBO-1, OEE1, OEE33, OE33, PSBO1, MSP-1 | PS II oxygen-evolving complex 1 | chr5:26568744-26570124 FORWARD LENGTH=332	1	6	6	2	6	6	5	6	6	6	6	5	6	6	5	6	6	6	6	5	2	2	2	2	2	2	2	1	30.1	30.1	11.4	35.142	332	332	1	46	0	69.534	By MS/MS	By MS/MS	By MS/MS	By MS/MS	By MS/MS	By MS/MS
AT5G66680.1	AT5G66680.1	5	5	5	>AT5G66680.1 | Symbols: DGL1 | dolichyl-diphosphooligosaccharide-protein glycosyltransferase 48kDa subunit family protein | chr5:26617840-26620581 REVERSE LENGTH=437	1	5	5	5	0	0	2	0	3	5	5	3	0	0	2	0	3	5	5	3	0	0	2	0	3	5	5	3	14.9	14.9	14.9	48.744	437	437	1	18	0	28.457	By matching	By matching	By MS/MS	By matching	By MS/MS	By MS/MS
AT5G67630.1;AT3G49830.1	AT5G67630.1	5;1	5;1	5;1	>AT5G67630.1 | Symbols: | P-loop containing nucleoside triphosphate hydrolases superfamily protein | chr5:26967535-26969306 REVERSE LENGTH=469	2	5	5	5	0	1	1	0	4	5	3	5	0	1	1	0	4	5	3	5	0	1	1	0	4	5	3	5	13.6	13.6	13.6	52.113	469	469;473	1	19	0	43.308	By matching	By matching	By matching	By matching	By MS/MS	By MS/MS
ATCG00020.1	ATCG00020.1	7	7	7	>ATCG00020.1 | Symbols: PSBA | photosystem II reaction center protein A | chrC:383-1444 REVERSE LENGTH=353	1	7	7	7	4	4	5	4	7	7	7	7	4	4	5	4	7	7	7	7	4	4	5	4	7	7	7	7	22.4	22.4	22.4	38.936	353	353	1	60	0	92.709	By MS/MS	By MS/MS	By MS/MS	By matching	By MS/MS	By MS/MS
ATCG00120.1	ATCG00120.1	10	10	10	>ATCG00120.1 | Symbols: ATPA | ATP synthase subunit alpha | chrC:9938-11461 REVERSE LENGTH=507	1	10	10	10	6	7	10	3	10	10	9	10	6	7	10	3	10	10	9	10	6	7	10	3	10	10	9	10	23.5	23.5	23.5	55.328	507	507	1	71	0	68.285	By matching	By MS/MS	By MS/MS	By matching	By MS/MS	By MS/MS
ATCG00270.1	ATCG00270.1	7	7	7	>ATCG00270.1 | Symbols: PSBD | photosystem II reaction center protein D | chrC:32711-33772 FORWARD LENGTH=353	1	7	7	7	5	6	5	5	7	6	6	7	5	6	5	5	7	6	6	7	5	6	5	5	7	6	6	7	27.2	27.2	27.2	39.547	353	353	1	68	0	217.54	By MS/MS	By matching	By MS/MS	By MS/MS	By MS/MS	By MS/MS
ATCG00280.1	ATCG00280.1	9	9	9	>ATCG00280.1 | Symbols: PSBC | photosystem II reaction center protein C | chrC:33720-35141 FORWARD LENGTH=473	1	9	9	9	4	3	7	4	9	8	8	7	4	3	7	4	9	8	8	7	4	3	7	4	9	8	8	7	25.6	25.6	25.6	51.867	473	473	1	59	0	199.57	By MS/MS	By MS/MS	By MS/MS	By MS/MS	By MS/MS	By MS/MS
ATCG00340.1	ATCG00340.1	3	3	3	>ATCG00340.1 | Symbols: PSAB | Photosystem I, PsaA/PsaB protein | chrC:37375-39579 REVERSE LENGTH=734	1	3	3	3	1	0	3	0	3	3	3	3	1	0	3	0	3	3	3	3	1	0	3	0	3	3	3	3	5.3	5.3	5.3	82.474	734	734	1	16	0	21.144	By matching	By matching	By MS/MS	By matching	By MS/MS	By MS/MS
ATCG00480.1	ATCG00480.1	9	9	8	>ATCG00480.1 | Symbols: ATPB, PB | ATP synthase subunit beta | chrC:52660-54156 REVERSE LENGTH=498	1	9	9	8	1	4	8	2	7	5	3	3	1	4	8	2	7	5	3	3	1	4	8	2	7	5	2	3	27.1	27.1	24.9	53.933	498	498	1	33	0	88.208	By matching	By matching	By MS/MS	By matching	By MS/MS	By MS/MS
ATCG00490.1;ATMG00280.1;AT2G07732.1	ATCG00490.1	15;2;1	15;2;1	15;2;1	>ATCG00490.1 | Symbols: RBCL | ribulose-bisphosphate carboxylases | chrC:54958-56397 FORWARD LENGTH=479	3	15	15	15	7	7	14	3	12	11	9	8	7	7	14	3	12	11	9	8	7	7	14	3	12	11	9	8	38.6	38.6	38.6	52.954	479	479;110;116	1	76	0	134.82	By MS/MS	By MS/MS	By MS/MS	By matching	By MS/MS	By MS/MS
ATCG00500.1	ATCG00500.1	2	2	2	>ATCG00500.1 | Symbols: ACCD | acetyl-CoA carboxylase carboxyl transferase subunit beta | chrC:57075-58541 FORWARD LENGTH=488	1	2	2	2	0	0	1	0	2	2	2	2	0	0	1	0	2	2	2	2	0	0	1	0	2	2	2	2	5.3	5.3	5.3	55.609	488	488	1	9	0	12.134	By matching	By matching	By matching	By matching	By MS/MS	By MS/MS
ATCG00680.1	ATCG00680.1	8	8	8	>ATCG00680.1 | Symbols: PSBB | photosystem II reaction center protein B | chrC:72371-73897 FORWARD LENGTH=508	1	8	8	8	5	5	8	3	8	8	8	7	5	5	8	3	8	8	8	7	5	5	8	3	8	8	8	7	19.3	19.3	19.3	56.036	508	508	1	56	0	323.31	By MS/MS	By MS/MS	By MS/MS	By MS/MS	By MS/MS	By MS/MS
[truncated: 83 more columns]

## Sheet: His6-Strep-Csy4
Protein.IDs	Majority.protein.IDs	Peptide.counts..all.	Peptide.counts..razor.unique.	Peptide.counts..unique.	Fasta.headers	Number.of.proteins	Peptides	Razor...unique.peptides	Unique.peptides	Peptides.minus_1	Peptides.minus_2	Peptides.minus_3	Peptides.minus_4	Peptides.plus_1	Peptides.plus_2	Peptides.plus_3	Peptides.plus_4	Razor...unique.peptides.minus_1	Razor...unique.peptides.minus_2	Razor...unique.peptides.minus_3	Razor...unique.peptides.minus_4	Razor...unique.peptides.plus_1	Razor...unique.peptides.plus_2	Razor...unique.peptides.plus_3	Razor...unique.peptides.plus_4	Unique.peptides.minus_1	Unique.peptides.minus_2	Unique.peptides.minus_3	Unique.peptides.minus_4	Unique.peptides.plus_1	Unique.peptides.plus_2	Unique.peptides.plus_3	Unique.peptides.plus_4	Sequence.coverage....	Unique...razor.sequence.coverage....	Unique.sequence.coverage....	Mol..weight..kDa.	Sequence.length	Sequence.lengths	Fraction.average	Fraction.1	Q.value	Score	Identification.type.minus_1	Identification.type.minus_2	Identification.type.minus_3	Identification.type.minus_4	Identification.type.plus_1	Identification.type.plus_2
AT1G01080.1;AT1G01080.2	AT1G01080.1;AT1G01080.2	4;4	4;4	4;4	>AT1G01080.1 | Symbols: | RNA-binding (RRM/RBD/RNP motifs) family protein | chr1:45503-46789 REVERSE LENGTH=293;>AT1G01080.2 | Symbols: | RNA-binding (RRM/RBD/RNP motifs) family protein | chr1:45503-46789 REVERSE LENGTH=294	2	4	4	4	0	0	3	3	2	4	4	3	0	0	3	3	2	4	4	3	0	0	3	3	2	4	4	3	17.4	17.4	17.4	32.575	293	293;294	1	21	0	30.535	By matching	By matching	By MS/MS	By matching	By MS/MS	By MS/MS
AT1G01610.1;AT4G00400.1	AT1G01610.1;AT4G00400.1	3;2	3;2	3;2	>AT1G01610.1 | Symbols: ATGPAT4, GPAT4 | glycerol-3-phosphate acyltransferase 4 | chr1:221950-224255 REVERSE LENGTH=503;>AT4G00400.1 | Symbols: GPAT8, AtGPAT8 | glycerol-3-phosphate acyltransferase 8 | chr4:174312-176734 REVERSE LENGTH=500	2	3	3	3	0	3	3	2	2	2	2	2	0	3	3	2	2	2	2	2	0	3	3	2	2	2	2	2	6.6	6.6	6.6	56.261	503	503;500	1	16	0	18.196	By matching	By MS/MS	By MS/MS	By MS/MS	By matching	By MS/MS
AT1G02140.1	AT1G02140.1	4	4	4	>AT1G02140.1 | Symbols: MEE63, MAGO, HAP1 | mago nashi family protein | chr1:403467-404401 REVERSE LENGTH=150	1	4	4	4	0	3	3	2	3	4	4	4	0	3	3	2	3	4	4	4	0	3	3	2	3	4	4	4	38.7	38.7	38.7	17.458	150	150	1	23	0	62.396	By matching	By matching	By matching	By matching	By MS/MS	By MS/MS
AT1G03130.1;AT4G02770.1	AT1G03130.1;AT4G02770.1	3;3	3;3	3;3	>AT1G03130.1 | Symbols: PSAD-2 | photosystem I subunit D-2 | chr1:753528-754142 REVERSE LENGTH=204;>AT4G02770.1 | Symbols: PSAD-1 | photosystem I subunit D-1 | chr4:1229247-1229873 REVERSE LENGTH=208	2	3	3	3	1	1	2	2	1	1	3	3	1	1	2	2	1	1	3	3	1	1	2	2	1	1	3	3	25.5	25.5	25.5	22.306	204	204;208	1	30	0	38.005	By matching	By MS/MS	By MS/MS	By MS/MS	By MS/MS	By MS/MS
AT1G03140.1	AT1G03140.1	2	2	2	>AT1G03140.1 | Symbols: | splicing factor Prp18 family protein | chr1:754471-756223 REVERSE LENGTH=420	1	2	2	2	0	1	1	2	1	2	2	2	0	1	1	2	1	2	2	2	0	1	1	2	1	2	2	2	5.7	5.7	5.7	47.881	420	420	1	11	0	13.033	By matching	By matching	By matching	By MS/MS	By MS/MS	By MS/MS
AT1G03230.1	AT1G03230.1	11	11	8	>AT1G03230.1 | Symbols: | Eukaryotic aspartyl protease family protein | chr1:790110-791414 FORWARD LENGTH=434	1	11	11	8	8	11	11	11	10	11	11	11	8	11	11	11	10	11	11	11	6	8	8	8	8	8	8	8	33.4	33.4	24.4	46.148	434	434	1	84	0	212.63	By MS/MS	By MS/MS	By MS/MS	By MS/MS	By MS/MS	By MS/MS
AT1G03600.1	AT1G03600.1	3	3	3	>AT1G03600.1 | Symbols: PSB27 | photosystem II family protein | chr1:898916-899440 FORWARD LENGTH=174	1	3	3	3	0	1	2	1	2	2	2	1	0	1	2	1	2	2	2	1	0	1	2	1	2	2	2	1	27	27	27	18.834	174	174	1	11	0	18.196	By matching	By matching	By matching	By MS/MS	By MS/MS	By MS/MS
AT1G03630.2;AT1G03630.1	AT1G03630.2;AT1G03630.1	5;5	4;4	4;4	>AT1G03630.2 | Symbols: POR C, PORC | protochlorophyllide oxidoreductase C | chr1:907699-909245 FORWARD LENGTH=399;>AT1G03630.1 | Symbols: POR C, PORC | protochlorophyllide oxidoreductase C | chr1:907699-909245 FORWARD LENGTH=401	2	5	4	4	0	3	4	3	2	4	5	5	0	2	3	2	1	3	4	4	0	2	3	2	1	3	4	4	12.5	10.5	10.5	43.625	399	399;401	1	19	0	24.837	By matching	By MS/MS	By MS/MS	By MS/MS	By matching	By MS/MS
AT1G04170.1;AT4G18330.2;AT4G18330.1;AT2G18720.1	AT1G04170.1	16;4;3;1	16;4;3;1	16;4;3;1	>AT1G04170.1 | Symbols: EIF2 GAMMA | eukaryotic translation initiation factor 2 gamma subunit | chr1:1097423-1099702 FORWARD LENGTH=465	4	16	16	16	2	11	15	13	10	14	16	16	2	11	15	13	10	14	16	16	2	11	15	13	10	14	16	16	41.7	41.7	41.7	50.853	465	465;471;284;470	1	149	0	296.39	By matching	By MS/MS	By MS/MS	By MS/MS	By MS/MS	By MS/MS
AT1G04510.2;AT1G04510.1	AT1G04510.2;AT1G04510.1	6;6	5;5	5;5	>AT1G04510.2 | Symbols: MAC3A | MOS4-associated complex 3A | chr1:1226749-1230592 FORWARD LENGTH=523;>AT1G04510.1 | Symbols: MAC3A | MOS4-associated complex 3A | chr1:1226749-1230592 FORWARD LENGTH=523	2	6	5	5	1	1	3	5	3	3	6	6	0	1	2	4	2	2	5	5	0	1	2	4	2	2	5	5	14.5	12.4	12.4	56.881	523	523;523	1	21	0	39.551	By matching	By matching	By matching	By matching	By MS/MS	By matching
AT1G04980.1	AT1G04980.1	2	2	2	>AT1G04980.1 | Symbols: ATPDIL2-2, ATPDI10, PDI10, PDIL2-2 | PDI-like 2-2 | chr1:1413869-1416120 REVERSE LENGTH=447	1	2	2	2	0	1	1	2	2	2	2	2	0	1	1	2	2	2	2	2	0	1	1	2	2	2	2	2	6.5	6.5	6.5	48.403	447	447	1	12	0	11.59	By matching	By matching	By matching	By matching	By MS/MS	By MS/MS
AT1G05190.1	AT1G05190.1	2	2	2	>AT1G05190.1 | Symbols: emb2394 | Ribosomal protein L6 family | chr1:1502515-1503738 REVERSE LENGTH=223	1	2	2	2	1	2	2	2	1	2	2	1	1	2	2	2	1	2	2	1	1	2	2	2	1	2	2	1	10.3	10.3	10.3	24.705	223	223	1	13	0	12.592	By matching	By MS/MS	By matching	By MS/MS	By matching	By MS/MS
AT1G06220.2;AT1G06220.1	AT1G06220.2;AT1G06220.1	13;13	13;13	4;4	>AT1G06220.2 | Symbols: MEE5 | Ribosomal protein S5/Elongation factor G/III/V family protein | chr1:1900524-1904583 FORWARD LENGTH=987;>AT1G06220.1 | Symbols: MEE5, CLO, GFA1 | Ribosomal protein S5/Elongation factor G/III/V family protein | chr1:1900524-19	2	13	13	4	0	9	9	8	9	12	12	13	0	9	9	8	9	12	12	13	0	4	3	3	2	4	3	4	17.4	17.4	5.6	110.44	987	987;987	1	78	0	98.43	By matching	By MS/MS	By MS/MS	By MS/MS	By MS/MS	By MS/MS
AT1G06230.3;AT1G06230.2;AT1G06230.1	AT1G06230.3;AT1G06230.2;AT1G06230.1	2;2;2	2;2;2	2;2;2	>AT1G06230.3 | Symbols: GTE4 | global transcription factor group E4 | chr1:1907626-1910183 FORWARD LENGTH=766;>AT1G06230.2 | Symbols: GTE4 | global transcription factor group E4 | chr1:1907626-1910183 FORWARD LENGTH=766;>AT1G06230.1 | Symbols: GTE4 | globa	3	2	2	2	0	2	1	1	2	2	2	2	0	2	1	1	2	2	2	2	0	2	1	1	2	2	2	2	3.1	3.1	3.1	84.094	766	766;766;766	1	12	0	11.488	By matching	By matching	By matching	By matching	By MS/MS	By MS/MS
AT1G06690.1	AT1G06690.1	2	2	2	>AT1G06690.1 | Symbols: | NAD(P)-linked oxidoreductase superfamily protein | chr1:2049742-2052039 REVERSE LENGTH=377	1	2	2	2	1	2	2	2	2	2	2	2	1	2	2	2	2	2	2	2	1	2	2	2	2	2	2	2	8	8	8	41.497	377	377	1	15	0	14.86	By matching	By matching	By matching	By matching	By MS/MS	By MS/MS
AT1G06950.1	AT1G06950.1	11	11	11	>AT1G06950.1 | Symbols: ATTIC110, TIC110 | translocon at the inner envelope membrane of chloroplasts 110 | chr1:2130303-2135563 REVERSE LENGTH=1016	1	11	11	11	0	2	7	6	5	9	10	11	0	2	7	6	5	9	10	11	0	2	7	6	5	9	10	11	14.1	14.1	14.1	112.12	1016	1016	1	50	0	77.316	By matching	By matching	By MS/MS	By matching	By MS/MS	By MS/MS
AT1G06960.2;AT1G06960.1;AT1G06960.3	AT1G06960.2;AT1G06960.1;AT1G06960.3	2;2;1	2;2;1	1;1;1	>AT1G06960.2 | Symbols: | RNA-binding (RRM/RBD/RNP motifs) family protein | chr1:2135930-2137533 FORWARD LENGTH=228;>AT1G06960.1 | Symbols: | RNA-binding (RRM/RBD/RNP motifs) family protein | chr1:2135930-2137533 FORWARD LENGTH=229;>AT1G06960.3 | Symbols	3	2	2	1	0	1	2	1	1	2	2	2	0	1	2	1	1	2	2	2	0	0	1	0	0	1	1	1	8.3	8.3	3.5	26.124	228	228;229;200	1	11	0	11.754	By matching	By matching	By matching	By matching	By MS/MS	By MS/MS
AT5G59970.1;AT5G59690.1;AT3G53730.1;AT3G46320.1;AT3G45930.1;AT2G28740.1;AT1G07820.2;AT1G07820.1;AT1G07660.1;AT1G07660.2	AT5G59970.1;AT5G59690.1;AT3G53730.1;AT3G46320.1;AT3G45930.1;AT2G28740.1;AT1G07820.2;AT1G07820.1;AT1G07660.1;AT1G07660.2	7;7;7;7;7;7;7;7;7;6	7;7;7;7;7;7;7;7;7;6	7;7;7;7;7;7;7;7;7;6	>AT5G59970.1 | Symbols: | Histone superfamily protein | chr5:24146352-24146663 REVERSE LENGTH=103;>AT5G59690.1 | Symbols: | Histone superfamily protein | chr5:24051649-24051960 FORWARD LENGTH=103;>AT3G53730.1 | Symbols: | Histone superfamily protein | c	10	7	7	7	4	6	7	7	5	5	6	6	4	6	7	7	5	5	6	6	4	6	7	7	5	5	6	6	58.3	58.3	58.3	11.409	103	103;103;103;103;103;103;103;103;103;86	1	58	0	46.857	By MS/MS	By MS/MS	By MS/MS	By MS/MS	By MS/MS	By MS/MS
AT5G60390.3;AT5G60390.1;AT1G07940.2;AT1G07940.1;AT1G07930.1;AT1G07920.1;AT5G60390.2;AT1G07930.2	AT5G60390.3;AT5G60390.1;AT1G07940.2;AT1G07940.1;AT1G07930.1;AT1G07920.1;AT5G60390.2;AT1G07930.2	27;27;27;27;27;27;23;21	27;27;27;27;27;27;23;21	27;27;27;27;27;27;23;21	>AT5G60390.3 | Symbols: | GTP binding Elongation factor Tu family protein | chr5:24289226-24290675 FORWARD LENGTH=449;>AT5G60390.1 | Symbols: | GTP binding Elongation factor Tu family protein | chr5:24289226-24290675 FORWARD LENGTH=449;>AT1G07940.2 | Sym	8	27	27	27	24	25	25	27	25	26	26	26	24	25	25	27	25	26	26	26	24	25	25	27	25	26	26	26	64.1	64.1	64.1	49.502	449	449;449;449;449;449;449;400;372	1	732	0	323.31	By MS/MS	By MS/MS	By MS/MS	By MS/MS	By MS/MS	By MS/MS
AT1G08450.2;AT1G08450.3;AT1G08450.1	AT1G08450.2;AT1G08450.3;AT1G08450.1	6;6;6	6;6;6	6;6;6	>AT1G08450.2 | Symbols: CRT3, PSL1, EBS2, AtCRT3 | calreticulin 3 | chr1:2668008-2671800 REVERSE LENGTH=370;>AT1G08450.3 | Symbols: CRT3 | calreticulin 3 | chr1:2668008-2671800 REVERSE LENGTH=399;>AT1G08450.1 | Symbols: CRT3, PSL1, EBS2, AtCRT3 | calreticu	3	6	6	6	0	2	3	4	2	4	5	6	0	2	3	4	2	4	5	6	0	2	3	4	2	4	5	6	18.4	18.4	18.4	43.594	370	370;399;424	1	28	0	42.507	By matching	By matching	By MS/MS	By MS/MS	By MS/MS	By MS/MS
AT1G08640.1	AT1G08640.1	2	2	2	>AT1G08640.1 | Symbols: CJD1 | Chloroplast J-like domain 1 | chr1:2748714-2751209 REVERSE LENGTH=294	1	2	2	2	2	2	2	2	0	2	2	2	2	2	2	2	0	2	2	2	2	2	2	2	0	2	2	2	10.5	10.5	10.5	32.902	294	294	1	14	0	22.735	By matching	By MS/MS	By MS/MS	By MS/MS	By matching	By MS/MS
AT5G65360.1;AT5G10400.1;AT5G10390.1;AT3G27360.1;AT1G09200.1;AT5G65350.1;AT1G13370.1;AT1G19890.1	AT5G65360.1;AT5G10400.1;AT5G10390.1;AT3G27360.1;AT1G09200.1;AT5G65350.1	3;3;3;3;3;2;1;1	3;3;3;3;3;2;1;1	2;2;2;2;2;2;1;1	>AT5G65360.1 | Symbols: | Histone superfamily protein | chr5:26120099-26120509 REVERSE LENGTH=136;>AT5G10400.1 | Symbols: | Histone superfamily protein | chr5:3270478-3270888 REVERSE LENGTH=136;>AT5G10390.1 | Symbols: | Histone superfamily protein | chr	8	3	3	2	2	2	2	2	1	1	2	1	2	2	2	2	1	1	2	1	2	2	1	1	1	1	1	0	35.3	35.3	30.1	15.268	136	136;136;136;136;136;139;136;137	1	14	0	36.78	By MS/MS	By matching	By MS/MS	By MS/MS	By MS/MS	By matching
AT1G09340.1	AT1G09340.1	20	20	20	>AT1G09340.1 | Symbols: CRB, CSP41B, HIP1.3 | chloroplast RNA binding | chr1:3015473-3018035 FORWARD LENGTH=378	1	20	20	20	12	15	18	18	16	19	20	19	12	15	18	18	16	19	20	19	12	15	18	18	16	19	20	19	53.4	53.4	53.4	42.619	378	378	1	208	0	323.31	By MS/MS	By MS/MS	By MS/MS	By MS/MS	By MS/MS	By MS/MS
AT1G09560.1;AT3G62020.2;AT1G02335.1;AT3G62020.1	AT1G09560.1;AT3G62020.2;AT1G02335.1;AT3G62020.1	2;1;1;1	2;1;1;1	2;1;1;1	>AT1G09560.1 | Symbols: GLP5 | germin-like protein 5 | chr1:3093896-3094639 FORWARD LENGTH=219;>AT3G62020.2 | Symbols: GLP10 | germin-like protein 10 | chr3:22971443-22972018 REVERSE LENGTH=191;>AT1G02335.1 | Symbols: GL22 | germin-like protein subfamily 2	4	2	2	2	0	2	1	2	1	1	1	1	0	2	1	2	1	1	1	1	0	2	1	2	1	1	1	1	15.1	15.1	15.1	22.868	219	219;191;219;220	1	9	0	21.592	By matching	By matching	By matching	By MS/MS	By MS/MS	By MS/MS
AT1G09760.1	AT1G09760.1	10	10	10	>AT1G09760.1 | Symbols: U2A | U2 small nuclear ribonucleoprotein A | chr1:3159476-3161603 REVERSE LENGTH=249	1	10	10	10	5	7	9	9	5	9	9	10	5	7	9	9	5	9	9	10	5	7	9	9	5	9	9	10	44.6	44.6	44.6	28.041	249	249	1	63	0	99.821	By MS/MS	By MS/MS	By MS/MS	By MS/MS	By MS/MS	By MS/MS
AT1G09770.1	AT1G09770.1	3	3	3	>AT1G09770.1 | Symbols: ATCDC5, CDC5, ATMYBCDC5 | cell division cycle 5 | chr1:3162002-3165122 FORWARD LENGTH=844	1	3	3	3	0	2	3	3	2	3	3	3	0	2	3	3	2	3	3	3	0	2	3	3	2	3	3	3	4.4	4.4	4.4	95.766	844	844	1	20	0	20.002	By matching	By matching	By MS/MS	By matching	By MS/MS	By MS/MS
AT1G10200.1	AT1G10200.1	3	3	3	>AT1G10200.1 | Symbols: WLIM1 | GATA type zinc finger transcription factor family protein | chr1:3346677-3347763 REVERSE LENGTH=190	1	3	3	3	0	0	2	2	0	1	3	3	0	0	2	2	0	1	3	3	0	0	2	2	0	1	3	3	16.8	16.8	16.8	21.04	190	190	1	11	0	16.787	By matching	By matching	By matching	By MS/MS	By matching	By matching
AT1G10390.2;AT1G10390.1	AT1G10390.2;AT1G10390.1	2;2	2;2	2;2	>AT1G10390.2 | Symbols: | Nucleoporin autopeptidase | chr1:3407265-3412045 REVERSE LENGTH=1041;>AT1G10390.1 | Symbols: | Nucleoporin autopeptidase | chr1:3407265-3412045 REVERSE LENGTH=1041	2	2	2	2	0	1	2	1	1	2	2	2	0	1	2	1	1	2	2	2	0	1	2	1	1	2	2	2	2.7	2.7	2.7	106.31	1041	1041;1041	1	11	0	12.27	By matching	By matching	By matching	By matching	By matching	By MS/MS
AT1G11580.1	AT1G11580.1	8	7	7	>AT1G11580.1 | Symbols: ATPMEPCRA, PMEPCRA | methylesterase PCR A | chr1:3888730-3890649 FORWARD LENGTH=557	1	8	7	7	0	2	6	6	1	4	8	7	0	2	5	5	1	3	7	6	0	2	5	5	1	3	7	6	16	14.7	14.7	61.687	557	557	1	29	0	56.184	By matching	By matching	By MS/MS	By MS/MS	By matching	By MS/MS
AT1G11860.3;AT1G11860.2;AT1G11860.1	AT1G11860.3;AT1G11860.2;AT1G11860.1	2;2;2	2;2;2	2;2;2	>AT1G11860.3 | Symbols: | Glycine cleavage T-protein family | chr1:4001801-4003245 FORWARD LENGTH=408;>AT1G11860.2 | Symbols: | Glycine cleavage T-protein family | chr1:4001801-4003245 FORWARD LENGTH=408;>AT1G11860.1 | Symbols: | Glycine cleavage T-prot	3	2	2	2	1	1	2	2	2	2	2	2	1	1	2	2	2	2	2	2	1	1	2	2	2	2	2	2	8.1	8.1	8.1	44.444	408	408;408;408	1	14	0	13.999	By matching	By matching	By matching	By matching	By MS/MS	By MS/MS
AT1G12900.4;AT1G12900.3;AT1G12900.1;AT1G12900.2	AT1G12900.4;AT1G12900.3;AT1G12900.1;AT1G12900.2	14;14;14;10	3;3;3;0	3;3;3;0	>AT1G12900.4 | Symbols: GAPA-2 | glyceraldehyde 3-phosphate dehydrogenase A subunit 2 | chr1:4392634-4393850 REVERSE LENGTH=350;>AT1G12900.3 | Symbols: GAPA-2 | glyceraldehyde 3-phosphate dehydrogenase A subunit 2 | chr1:4392634-4393850 REVERSE LENGTH=350;	4	14	3	3	5	11	12	13	13	12	14	14	0	3	3	3	3	2	3	3	0	3	3	3	3	2	3	3	47.7	12	12	37.667	350	350;350;399;317	1	20	0	113.77	By matching	By MS/MS	By MS/MS	By MS/MS	By MS/MS	By MS/MS
AT1G12920.1;AT3G26618.1	AT1G12920.1;AT3G26618.1	3;3	3;3	3;3	>AT1G12920.1 | Symbols: ERF1-2 | eukaryotic release factor 1-2 | chr1:4396555-4397859 REVERSE LENGTH=434;>AT3G26618.1 | Symbols: ERF1-3 | eukaryotic release factor 1-3 | chr3:9788854-9790161 FORWARD LENGTH=435	2	3	3	3	0	1	1	2	0	3	3	3	0	1	1	2	0	3	3	3	0	1	1	2	0	3	3	3	8.3	8.3	8.3	48.941	434	434;435	1	13	0	17.813	By matching	By matching	By matching	By MS/MS	By matching	By MS/MS
AT1G13440.2;AT3G04120.1;AT1G13440.1	AT1G13440.2;AT3G04120.1;AT1G13440.1	7;7;7	7;7;7	7;7;7	>AT1G13440.2 | Symbols: GAPC-2, GAPC2 | glyceraldehyde-3-phosphate dehydrogenase C2 | chr1:4608465-4610494 REVERSE LENGTH=310;>AT3G04120.1 | Symbols: GAPC, GAPC-1, GAPC1 | glyceraldehyde-3-phosphate dehydrogenase C subunit 1 | chr3:1081077-1083131 FORWARD	3	7	7	7	2	6	5	6	5	7	6	6	2	6	5	6	5	7	6	6	2	6	5	6	5	7	6	6	31.3	31.3	31.3	33.905	310	310;338;338	1	49	0	108.45	By matching	By MS/MS	By MS/MS	By MS/MS	By MS/MS	By MS/MS
AT1G13690.1	AT1G13690.1	2	2	2	>AT1G13690.1 | Symbols: ATE1 | ATPase E1 | chr1:4693380-4694179 FORWARD LENGTH=177	1	2	2	2	0	1	0	2	1	1	2	2	0	1	0	2	1	1	2	2	0	1	0	2	1	1	2	2	12.4	12.4	12.4	19.809	177	177	1	11	0	11.662	By matching	By matching	By matching	By matching	By matching	By MS/MS
AT1G14410.1	AT1G14410.1	5	4	4	>AT1G14410.1 | Symbols: ATWHY1, PTAC1, WHY1 | ssDNA-binding transcriptional regulator | chr1:4929352-4930810 REVERSE LENGTH=263	1	5	4	4	0	3	3	5	4	5	5	5	0	3	3	4	3	4	4	4	0	3	3	4	3	4	4	4	28.1	24	24	29.058	263	263	1	25	0	92.779	By matching	By matching	By matching	By MS/MS	By MS/MS	By MS/MS
AT1G14650.2;AT1G14650.1;AT1G14640.1	AT1G14650.2;AT1G14650.1	4;4;1	4;4;1	4;4;1	>AT1G14650.2 | Symbols: | SWAP (Suppressor-of-White-APricot)/surp domain-containing protein / ubiquitin family protein | chr1:5028077-5030520 FORWARD LENGTH=785;>AT1G14650.1 | Symbols: | SWAP (Suppressor-of-White-APricot)/surp domain-containing protein /	3	4	4	4	1	1	2	2	3	2	3	4	1	1	2	2	3	2	3	4	1	1	2	2	3	2	3	4	7	7	7	87.593	785	785;785;735	1	18	0	33.139	By matching	By matching	By matching	By matching	By MS/MS	By MS/MS
AT1G15820.1	AT1G15820.1	3	3	3	>AT1G15820.1 | Symbols: LHCB6, CP24 | light harvesting complex photosystem II subunit 6 | chr1:5446685-5447676 REVERSE LENGTH=258	1	3	3	3	1	2	3	3	2	2	3	3	1	2	3	3	2	2	3	3	1	2	3	3	2	2	3	3	15.1	15.1	15.1	27.522	258	258	1	22	0	40.41	By matching	By MS/MS	By MS/MS	By MS/MS	By matching	By MS/MS
AT1G15980.1	AT1G15980.1	3	3	3	>AT1G15980.1 | Symbols: NDF1, NDH48 | NDH-dependent cyclic electron flow 1 | chr1:5489314-5491199 FORWARD LENGTH=461	1	3	3	3	0	3	3	2	1	3	3	3	0	3	3	2	1	3	3	3	0	3	3	2	1	3	3	3	7.6	7.6	7.6	51.022	461	461	1	18	0	17.541	By matching	By matching	By matching	By matching	By matching	By MS/MS
AT1G16030.1	AT1G16030.1	6	2	2	>AT1G16030.1 | Symbols: Hsp70b | heat shock protein 70B | chr1:5502386-5504326 REVERSE LENGTH=646	1	6	2	2	2	5	6	6	4	6	6	6	1	2	2	2	1	2	2	2	1	2	2	2	1	2	2	2	11.8	4.3	4.3	70.914	646	646	1	14	0	14.246	By matching	By MS/MS	By MS/MS	By MS/MS	By matching	By MS/MS
AT1G17220.1	AT1G17220.1	11	11	11	>AT1G17220.1 | Symbols: FUG1 | Translation initiation factor 2, small GTP-binding protein | chr1:5885383-5890165 FORWARD LENGTH=1026	1	11	11	11	0	8	9	9	5	10	11	11	0	8	9	9	5	10	11	11	0	8	9	9	5	10	11	11	13.4	13.4	13.4	109.75	1026	1026	1	65	0	114.93	By matching	By MS/MS	By MS/MS	By MS/MS	By MS/MS	By MS/MS
AT1G18060.1	AT1G18060.1	5	5	5	>AT1G18060.1 | Symbols: | unknown protein; INVOLVED IN: biological_process unknown; LOCATED IN: chloroplast; EXPRESSED IN: 22 plant structures; EXPRESSED DURING: 13 growth stages; Has 74 Blast hits to 74 proteins in 29 species: Archae - 0; Bacteria - 19;	1	5	5	5	3	4	5	5	4	5	5	4	3	4	5	5	4	5	5	4	3	4	5	5	4	5	5	4	29.2	29.2	29.2	25.198	226	226	1	35	0	37.413	By MS/MS	By MS/MS	By MS/MS	By MS/MS	By MS/MS	By MS/MS
AT1G20020.2;AT1G20020.1;AT1G20020.3	AT1G20020.2;AT1G20020.1;AT1G20020.3	9;9;8	8;8;7	8;8;7	>AT1G20020.2 | Symbols: ATLFNR2 | ferredoxin-NADP(+)-oxidoreductase 2 | chr1:6942851-6944868 FORWARD LENGTH=350;>AT1G20020.1 | Symbols: ATLFNR2, FNR2 | ferredoxin-NADP(+)-oxidoreductase 2 | chr1:6942851-6944868 FORWARD LENGTH=369;>AT1G20020.3 | Symbols: AT	3	9	8	8	0	4	5	3	6	8	9	7	0	3	4	3	5	7	8	6	0	3	4	3	5	7	8	6	34.3	31.1	31.1	39.233	350	350;369;369	1	45	0	142.2	By matching	By matching	By matching	By MS/MS	By MS/MS	By MS/MS
AT1G20580.1;AT1G76300.1;AT1G20600.1	AT1G20580.1;AT1G76300.1;AT1G20600.1	2;1;1	2;1;1	2;1;1	>AT1G20580.1 | Symbols: | Small nuclear ribonucleoprotein family protein | chr1:7128979-7130371 FORWARD LENGTH=131;>AT1G76300.1 | Symbols: SmD3 | snRNP core protein SMD3 | chr1:28625957-28627080 FORWARD LENGTH=128;>AT1G20600.1 | Symbols: | AP2/B3-like tr	3	2	2	2	1	2	2	2	1	1	2	2	1	2	2	2	1	1	2	2	1	2	2	2	1	1	2	2	19.1	19.1	19.1	14.237	131	131;128;237	1	17	0	14.79	By MS/MS	By MS/MS	By MS/MS	By MS/MS	By MS/MS	By MS/MS
AT1G20960.2;AT1G20960.1;AT2G42270.1;AT5G61140.1;AT5G61140.2	AT1G20960.2;AT1G20960.1	34;34;5;1;1	34;34;5;1;1	34;34;5;1;1	>AT1G20960.2 | Symbols: emb1507 | U5 small nuclear ribonucleoprotein helicase, putative | chr1:7302591-7309914 REVERSE LENGTH=2171;>AT1G20960.1 | Symbols: emb1507 | U5 small nuclear ribonucleoprotein helicase, putative | chr1:7302591-7309914 REVERSE LENGTH	5	34	34	34	2	17	27	27	13	22	30	28	2	17	27	27	13	22	30	28	2	17	27	27	13	22	30	28	19.3	19.3	19.3	247.1	2171	2171;2171;2172;2146;2157	1	177	0	281.31	By matching	By MS/MS	By MS/MS	By MS/MS	By MS/MS	By MS/MS
AT1G21500.1	AT1G21500.1	2	2	2	>AT1G21500.1 | Symbols: | unknown protein; Has 29 Blast hits to 29 proteins in 12 species: Archae - 0; Bacteria - 0; Metazoa - 0; Fungi - 2; Plants - 27; Viruses - 0; Other Eukaryotes - 0 (source: NCBI BLink). | chr1:7530047-7530954 REVERSE LENGTH=126	1	2	2	2	0	1	2	1	1	2	2	1	0	1	2	1	1	2	2	1	0	1	2	1	1	2	2	1	8.7	8.7	8.7	13.258	126	126	1	16	0	12.395	By matching	By matching	By MS/MS	By MS/MS	By matching	By matching
AT1G22410.1;AT4G33510.2;AT4G33510.1	AT1G22410.1	3;1;1	3;1;1	3;1;1	>AT1G22410.1 | Symbols: | Class-II DAHP synthetase family protein | chr1:7912120-7914742 FORWARD LENGTH=527	3	3	3	3	0	1	2	1	0	2	2	2	0	1	2	1	0	2	2	2	0	1	2	1	0	2	2	2	9.9	9.9	9.9	58.326	527	527;432;507	1	10	0	19.403	By matching	By matching	By matching	By matching	By matching	By MS/MS
AT1G22700.3;AT1G22700.2;AT1G22700.1	AT1G22700.3;AT1G22700.2;AT1G22700.1	4;4;4	4;4;4	4;4;4	>AT1G22700.3 | Symbols: | Tetratricopeptide repeat (TPR)-like superfamily protein | chr1:8028323-8029289 REVERSE LENGTH=211;>AT1G22700.2 | Symbols: | Tetratricopeptide repeat (TPR)-like superfamily protein | chr1:8028323-8029878 REVERSE LENGTH=296;>AT1G2	3	4	4	4	0	3	3	4	1	3	3	3	0	3	3	4	1	3	3	3	0	3	3	4	1	3	3	3	20.4	20.4	20.4	23.811	211	211;296;301	1	25	0	30.24	By matching	By MS/MS	By MS/MS	By MS/MS	By matching	By MS/MS
AT3G52590.1;AT2G36170.1;AT4G05050.4;AT2G35635.1;AT1G31340.1;AT1G23410.1;AT3G62250.1;AT2G47110.2;AT2G47110.1;AT4G05050.3;AT4G05050.2;AT4G05050.1;AT4G02890.2;AT4G02890.1;AT1G55060.1;AT4G05320.5;AT4G02890.4;AT4G02890.3;AT5G03240.3;AT5G03240.2;AT5G03240.1;AT1G65350.1;AT5G37640.1;AT4G05320.6;AT4G05320.3;AT4G05320.1;AT5G20620.1;AT4G05320.4;AT4G05320.2;AT3G09790.1	AT3G52590.1;AT2G36170.1;AT4G05050.4;AT2G35635.1;AT1G31340.1;AT1G23410.1;AT3G62250.1;AT2G47110.2;AT2G47110.1;AT4G05050.3;AT4G05050.2;AT4G05050.1;AT4G02890.2;AT4G02890.1;AT1G55060.1;AT4G05320.5;AT4G02890.4;AT4G02890.3;AT5G03240.3;AT5G03240.2;AT5G03240.1;AT1G65350.1;AT5G37640.1;AT4G05320.6;AT4G05320.3;AT4G05320.1;AT5G20620.1;AT4G05320.4;AT4G05320.2;AT3G09790.1	3;3;3;3;3;3;3;3;3;3;3;3;3;3;3;3;3;3;3;3;3;3;3;3;3;3;3;3;3;3	3;3;3;3;3;3;3;3;3;3;3;3;3;3;3;3;3;3;3;3;3;3;3;3;3;3;3;3;3;3	3;3;3;3;3;3;3;3;3;3;3;3;3;3;3;3;3;3;3;3;3;3;3;3;3;3;3;3;3;3	>AT3G52590.1 | Symbols: UBQ1, EMB2167, ERD16, HAP4 | ubiquitin extension protein 1 | chr3:19505668-19506681 FORWARD LENGTH=128;>AT2G36170.1 | Symbols: | Ubiquitin supergroup;Ribosomal protein L40e | chr2:15172153-15173046 FORWARD LENGTH=128;>AT4G05050.4 |	30	3	3	3	1	3	2	2	2	3	3	3	1	3	2	2	2	3	3	3	1	3	2	2	2	3	3	3	26.6	26.6	26.6	14.733	128	128;128;153;154;156;156;157;157;157;229;229;229;229;229;230;305;305;305;306;306;306;319;322;381;381;381;382;457;457;631	1	27	0	34.969	By matching	By MS/MS	By MS/MS	By MS/MS	By MS/MS	By MS/MS
AT1G24360.1	AT1G24360.1	7	7	7	>AT1G24360.1 | Symbols: | NAD(P)-binding Rossmann-fold superfamily protein | chr1:8640820-8643283 FORWARD LENGTH=319	1	7	7	7	4	7	6	5	6	7	7	7	4	7	6	5	6	7	7	7	4	7	6	5	6	7	7	7	29.2	29.2	29.2	33.548	319	319	1	56	0	131.56	By matching	By MS/MS	By MS/MS	By MS/MS	By MS/MS	By MS/MS
AT1G24450.1	AT1G24450.1	7	7	7	>AT1G24450.1 | Symbols: NFD2 | Ribonuclease III family protein | chr1:8664201-8665077 FORWARD LENGTH=191	1	7	7	7	1	5	7	6	5	7	6	7	1	5	7	6	5	7	6	7	1	5	7	6	5	7	6	7	44	44	44	20.742	191	191	1	60	0	202.06	By matching	By MS/MS	By MS/MS	By MS/MS	By MS/MS	By MS/MS
AT1G27090.1	AT1G27090.1	3	3	3	>AT1G27090.1 | Symbols: | glycine-rich protein | chr1:9404041-9406098 REVERSE LENGTH=420	1	3	3	3	0	0	2	2	0	3	2	1	0	0	2	2	0	3	2	1	0	0	2	2	0	3	2	1	8.3	8.3	8.3	46.018	420	420	1	10	0	18.543	By matching	By matching	By MS/MS	By MS/MS	By matching	By MS/MS
AT1G28290.2;AT1G28290.1	AT1G28290.2;AT1G28290.1	7;7	7;7	7;7	>AT1G28290.2 | Symbols: AGP31 | arabinogalactan protein 31 | chr1:9889331-9890843 REVERSE LENGTH=315;>AT1G28290.1 | Symbols: AGP31 | arabinogalactan protein 31 | chr1:9889331-9890843 REVERSE LENGTH=359	2	7	7	7	3	6	7	7	7	7	7	7	3	6	7	7	7	7	7	7	3	6	7	7	7	7	7	7	16.5	16.5	16.5	33.932	315	315;359	1	54	0	73.114	By matching	By MS/MS	By MS/MS	By MS/MS	By MS/MS	By MS/MS
AT1G29250.1;AT2G34160.1;AT3G04620.1	AT1G29250.1;AT2G34160.1;AT3G04620.1	2;1;1	2;1;1	2;1;1	>AT1G29250.1 | Symbols: | Alba DNA/RNA-binding protein | chr1:10223461-10224592 REVERSE LENGTH=130;>AT2G34160.1 | Symbols: | Alba DNA/RNA-binding protein | chr2:14426283-14427220 FORWARD LENGTH=130;>AT3G04620.1 | Symbols: | Alba DNA/RNA-binding protein	3	2	2	2	1	1	1	1	2	2	2	2	1	1	1	1	2	2	2	2	1	1	1	1	2	2	2	2	26.9	26.9	26.9	14.574	130	130;130;164	1	12	0	24.698	By matching	By matching	By matching	By matching	By MS/MS	By MS/MS
AT1G29670.1	AT1G29670.1	2	2	2	>AT1G29670.1 | Symbols: | GDSL-like Lipase/Acylhydrolase superfamily protein | chr1:10375843-10377717 FORWARD LENGTH=363	1	2	2	2	0	0	2	2	2	2	2	1	0	0	2	2	2	2	2	1	0	0	2	2	2	2	2	1	8.3	8.3	8.3	39.871	363	363	1	11	0	16.842	By matching	By matching	By matching	By matching	By MS/MS	By MS/MS
AT2G34420.1;AT1G29930.1;AT1G29920.1;AT1G29910.1;AT2G05100.1;AT2G05070.1;AT3G27690.1;AT2G34430.1	AT2G34420.1;AT1G29930.1;AT1G29920.1;AT1G29910.1;AT2G05100.1;AT2G05070.1;AT3G27690.1;AT2G34430.1	4;4;4;4;3;3;3;3	4;4;4;4;3;3;3;3	4;4;4;4;3;3;3;3	>AT2G34420.1 | Symbols: LHB1B2, LHCB1.5 | photosystem II light harvesting complex gene B1B2 | chr2:14522716-14523513 REVERSE LENGTH=265;>AT1G29930.1 | Symbols: CAB1, AB140, CAB140, LHCB1.3 | chlorophyll A/B binding protein 1 | chr1:10478071-10478874 FORWAR	8	4	4	4	0	3	4	4	2	3	3	4	0	3	4	4	2	3	3	4	0	3	4	4	2	3	3	4	11.3	11.3	11.3	28.054	265	265;267;267;267;265;265;266;266	1	28	0	72.445	By matching	By MS/MS	By MS/MS	By MS/MS	By MS/MS	By MS/MS
AT1G31330.1	AT1G31330.1	7	7	7	>AT1G31330.1 | Symbols: PSAF | photosystem I subunit F | chr1:11215011-11215939 REVERSE LENGTH=221	1	7	7	7	5	7	7	7	6	6	7	6	5	7	7	7	6	6	7	6	5	7	7	7	6	6	7	6	38.9	38.9	38.9	24.173	221	221	1	64	0	185.27	By MS/MS	By MS/MS	By MS/MS	By MS/MS	By MS/MS	By MS/MS
AT1G32060.1	AT1G32060.1	3	3	3	>AT1G32060.1 | Symbols: PRK | phosphoribulokinase | chr1:11532668-11534406 FORWARD LENGTH=395	1	3	3	3	0	2	2	3	2	3	3	3	0	2	2	3	2	3	3	3	0	2	2	3	2	3	3	3	8.6	8.6	8.6	44.463	395	395	1	18	0	19.25	By matching	By matching	By matching	By matching	By MS/MS	By MS/MS
AT1G32990.1	AT1G32990.1	2	2	2	>AT1G32990.1 | Symbols: PRPL11 | plastid ribosomal protein l11 | chr1:11955827-11957139 FORWARD LENGTH=222	1	2	2	2	0	2	2	2	1	2	2	2	0	2	2	2	1	2	2	2	0	2	2	2	1	2	2	2	10.8	10.8	10.8	23.148	222	222	1	13	0	11.569	By matching	By MS/MS	By matching	By matching	By matching	By MS/MS
AT1G33140.1;AT1G33120.1;AT4G10450.1	AT1G33140.1;AT1G33120.1	3;3;1	3;3;1	3;3;1	>AT1G33140.1 | Symbols: PGY2 | Ribosomal protein L6 family | chr1:12023360-12024502 FORWARD LENGTH=194;>AT1G33120.1 | Symbols: | Ribosomal protein L6 family | chr1:12010986-12012223 FORWARD LENGTH=194	3	3	3	3	1	3	2	3	1	2	2	1	1	3	2	3	1	2	2	1	1	3	2	3	1	2	2	1	22.7	22.7	22.7	22.017	194	194;194;194	1	15	0	30.59	By matching	By matching	By matching	By MS/MS	By matching	By matching
AT1G33590.1	AT1G33590.1	10	10	10	>AT1G33590.1 | Symbols: | Leucine-rich repeat (LRR) family protein | chr1:12177788-12179221 FORWARD LENGTH=477	1	10	10	10	5	5	9	9	5	9	9	9	5	5	9	9	5	9	9	9	5	5	9	9	5	9	9	9	26.6	26.6	26.6	51.741	477	477	1	67	0	101.46	By matching	By MS/MS	By MS/MS	By MS/MS	By MS/MS	By MS/MS
AT1G33600.1	AT1G33600.1	5	5	5	>AT1G33600.1 | Symbols: | Leucine-rich repeat (LRR) family protein | chr1:12180776-12182212 FORWARD LENGTH=478	1	5	5	5	0	4	4	3	3	5	4	4	0	4	4	3	3	5	4	4	0	4	4	3	3	5	4	4	13.2	13.2	13.2	52.47	478	478	1	27	0	35.59	By matching	By MS/MS	By MS/MS	By MS/MS	By MS/MS	By MS/MS
AT1G33811.1	AT1G33811.1	5	5	5	>AT1G33811.1 | Symbols: | GDSL-like Lipase/Acylhydrolase superfamily protein | chr1:12267918-12269690 FORWARD LENGTH=370	1	5	5	5	1	2	5	4	3	4	5	3	1	2	5	4	3	4	5	3	1	2	5	4	3	4	5	3	20.5	20.5	20.5	41.697	370	370	1	27	0	38.683	By matching	By matching	By MS/MS	By MS/MS	By MS/MS	By MS/MS
AT1G41830.1;AT1G76160.1	AT1G41830.1	4;1	3;1	3;1	>AT1G41830.1 | Symbols: SKS6 | SKU5-similar 6 | chr1:15603892-15607802 REVERSE LENGTH=542	2	4	3	3	1	3	4	4	4	4	4	3	0	2	3	3	3	3	3	2	0	2	3	3	3	3	3	2	10.7	7.7	7.7	60.577	542	542;541	1	19	0	39.097	By matching	By MS/MS	By MS/MS	By MS/MS	By MS/MS	By MS/MS
AT1G42970.1	AT1G42970.1	16	13	13	>AT1G42970.1 | Symbols: GAPB | glyceraldehyde-3-phosphate dehydrogenase B subunit | chr1:16127552-16129584 FORWARD LENGTH=447	1	16	13	13	5	14	13	14	12	15	16	13	4	12	11	11	9	12	13	10	4	12	11	11	9	12	13	10	37.1	29.1	29.1	47.659	447	447	1	91	0	159.65	By matching	By MS/MS	By MS/MS	By MS/MS	By MS/MS	By MS/MS
AT1G44575.1;AT1G44575.2	AT1G44575.1;AT1G44575.2	9;6	9;6	9;6	>AT1G44575.1 | Symbols: NPQ4, PSBS | Chlorophyll A-B binding family protein | chr1:16871768-16873194 FORWARD LENGTH=265;>AT1G44575.2 | Symbols: NPQ4, PSBS | Chlorophyll A-B binding family protein | chr1:16871768-16872548 FORWARD LENGTH=205	2	9	9	9	7	9	8	8	6	7	8	8	7	9	8	8	6	7	8	8	7	9	8	8	6	7	8	8	38.5	38.5	38.5	28.007	265	265;205	1	86	0	323.31	By MS/MS	By MS/MS	By MS/MS	By MS/MS	By MS/MS	By MS/MS
AT1G44835.1;AT1G44835.2	AT1G44835.1;AT1G44835.2	2;2	2;2	2;2	>AT1G44835.1 | Symbols: | YbaK/aminoacyl-tRNA synthetase-associated domain | chr1:16939909-16942337 FORWARD LENGTH=307;>AT1G44835.2 | Symbols: | YbaK/aminoacyl-tRNA synthetase-associated domain | chr1:16939909-16942337 FORWARD LENGTH=308	2	2	2	2	0	1	1	1	1	1	2	2	0	1	1	1	1	1	2	2	0	1	1	1	1	1	2	2	10.4	10.4	10.4	33.71	307	307;308	1	9	0	15.159	By matching	By matching	By matching	By matching	By matching	By matching
AT1G48410.1;AT1G48410.3;AT1G48410.2;AT5G43810.2;AT5G43810.1;AT2G27880.1	AT1G48410.1;AT1G48410.3;AT1G48410.2	14;14;14;1;1;1	14;14;14;1;1;1	14;14;14;1;1;1	>AT1G48410.1 | Symbols: AGO1 | Stabilizer of iron transporter SufD / Polynucleotidyl transferase | chr1:17886285-17891892 REVERSE LENGTH=1048;>AT1G48410.3 | Symbols: AGO1 | Stabilizer of iron transporter SufD / Polynucleotidyl transferase | chr1:17886285-1	6	14	14	14	0	6	10	9	7	11	13	13	0	6	10	9	7	11	13	13	0	6	10	9	7	11	13	13	15.5	15.5	15.5	116.19	1048	1048;1050;1050;988;988;997	1	69	0	92.301	By matching	By matching	By MS/MS	By matching	By MS/MS	By MS/MS
AT1G48610.1;AT1G48610.2	AT1G48610.1;AT1G48610.2	8;7	8;7	8;7	>AT1G48610.1 | Symbols: | AT hook motif-containing protein | chr1:17971027-17972798 REVERSE LENGTH=212;>AT1G48610.2 | Symbols: | AT hook motif-containing protein | chr1:17971322-17972798 REVERSE LENGTH=198	2	8	8	8	0	4	6	6	1	7	8	6	0	4	6	6	1	7	8	6	0	4	6	6	1	7	8	6	59.9	59.9	59.9	21.674	212	212;198	1	38	0	54.591	By matching	By MS/MS	By MS/MS	By MS/MS	By matching	By MS/MS
AT1G48620.1	AT1G48620.1	6	6	6	>AT1G48620.1 | Symbols: HON5 | high mobility group A5 | chr1:17974148-17976301 REVERSE LENGTH=479	1	6	6	6	0	3	6	4	2	3	5	6	0	3	6	4	2	3	5	6	0	3	6	4	2	3	5	6	22.1	22.1	22.1	51.391	479	479	1	31	0	41.269	By matching	By matching	By MS/MS	By MS/MS	By MS/MS	By MS/MS
AT1G48850.1;AT1G48850.3;AT1G48850.2	AT1G48850.1;AT1G48850.3;AT1G48850.2	4;3;3	4;3;3	4;3;3	>AT1G48850.1 | Symbols: EMB1144 | chorismate synthase, putative / 5-enolpyruvylshikimate-3-phosphate phospholyase, putative | chr1:18065154-18067956 REVERSE LENGTH=436;>AT1G48850.3 | Symbols: EMB1144 | chorismate synthase, putative / 5-enolpyruvylshikimate	3	4	4	4	0	3	3	2	3	4	4	4	0	3	3	2	3	4	4	4	0	3	3	2	3	4	4	4	14.4	14.4	14.4	47.317	436	436;380;380	1	23	0	29.807	By matching	By matching	By matching	By MS/MS	By MS/MS	By MS/MS
AT1G48920.1;AT3G18610.1	AT1G48920.1	6;1	6;1	6;1	>AT1G48920.1 | Symbols: ATNUC-L1, PARL1, NUC-L1 | nucleolin like 1 | chr1:18098186-18101422 FORWARD LENGTH=557	2	6	6	6	0	1	4	4	2	3	6	5	0	1	4	4	2	3	6	5	0	1	4	4	2	3	6	5	10.2	10.2	10.2	58.773	557	557;636	1	27	0	40.84	By matching	By matching	By matching	By MS/MS	By MS/MS	By MS/MS
AT3G18780.2;AT1G49240.1;AT3G18780.1	AT3G18780.2;AT1G49240.1;AT3G18780.1	9;9;6	3;3;2	2;2;1	>AT3G18780.2 | Symbols: ACT2, DER1, LSR2, ENL2 | actin 2 | chr3:6475535-6476832 FORWARD LENGTH=377;>AT1G49240.1 | Symbols: ACT8 | actin 8 | chr1:18216539-18217947 FORWARD LENGTH=377;>AT3G18780.1 | Symbols: ACT2, DER1, LSR2, ENL2 | actin 2 | chr3:6475535-64	3	9	3	2	4	6	6	9	5	7	7	7	1	2	2	3	1	2	3	3	0	1	1	2	1	1	2	2	28.6	10.3	8.2	41.876	377	377;377;371	1	21	0	19.301	By MS/MS	By MS/MS	By MS/MS	By MS/MS	By matching	By MS/MS
AT1G49670.1;AT1G49670.2	AT1G49670.1;AT1G49670.2	3;3	3;3	3;3	>AT1G49670.1 | Symbols: NQR | ARP protein (REF) | chr1:18381591-18386021 REVERSE LENGTH=629;>AT1G49670.2 | Symbols: NQR | ARP protein (REF) | chr1:18381591-18386021 REVERSE LENGTH=652	2	3	3	3	0	2	1	3	2	2	2	3	0	2	1	3	2	2	2	3	0	2	1	3	2	2	2	3	6.7	6.7	6.7	67.943	629	629;652	1	15	0	30.028	By matching	By matching	By matching	By MS/MS	By MS/MS	By MS/MS
AT1G49750.1	AT1G49750.1	2	2	2	>AT1G49750.1 | Symbols: | Leucine-rich repeat (LRR) family protein | chr1:18411177-18412779 REVERSE LENGTH=494	1	2	2	2	1	2	2	2	2	2	2	2	1	2	2	2	2	2	2	2	1	2	2	2	2	2	2	2	4.9	4.9	4.9	54.407	494	494	1	15	0	13.717	By matching	By matching	By matching	By matching	By MS/MS	By MS/MS
AT1G51510.1	AT1G51510.1	3	3	3	>AT1G51510.1 | Symbols: Y14 | RNA-binding (RRM/RBD/RNP motifs) family protein | chr1:19103072-19104753 REVERSE LENGTH=202	1	3	3	3	0	1	2	2	2	3	3	3	0	1	2	2	2	3	3	3	0	1	2	2	2	3	3	3	8.9	8.9	8.9	22.438	202	202	1	16	0	17.264	By matching	By matching	By matching	By matching	By matching	By MS/MS
AT1G52740.1;AT4G13570.1;AT4G13570.2;AT3G54560.1;AT2G38810.3;AT2G38810.2;AT2G38810.1	AT1G52740.1;AT4G13570.1;AT4G13570.2;AT3G54560.1;AT2G38810.3;AT2G38810.2;AT2G38810.1	3;2;2;2;2;2;2	3;2;2;2;2;2;2	2;2;2;2;2;2;2	>AT1G52740.1 | Symbols: HTA9 | histone H2A protein 9 | chr1:19645409-19646221 FORWARD LENGTH=134;>AT4G13570.1 | Symbols: HTA4 | histone H2A 4 | chr4:7884516-7885664 FORWARD LENGTH=118;>AT4G13570.2 | Symbols: HTA4 | histone H2A 4 | chr4:7884582-7885664 FORW	7	3	3	2	1	3	3	3	1	3	3	3	1	3	3	3	1	3	3	3	0	2	2	2	0	2	2	2	19.4	19.4	12.7	14.271	134	134;118;124;136;136;136;136	1	22	0	18.089	By MS/MS	By MS/MS	By MS/MS	By MS/MS	By MS/MS	By MS/MS
AT3G13920.3;AT3G13920.1;AT1G54270.1;AT1G72730.1;AT3G13920.2;AT3G13920.4;AT1G54270.2	AT3G13920.3;AT3G13920.1;AT1G54270.1;AT1G72730.1;AT3G13920.2;AT3G13920.4;AT1G54270.2	3;3;3;3;3;2;2	3;3;3;3;3;2;2	3;3;3;3;3;2;2	>AT3G13920.3 | Symbols: EIF4A1, RH4, TIF4A1 | eukaryotic translation initiation factor 4A1 | chr3:4592635-4594094 REVERSE LENGTH=402;>AT3G13920.1 | Symbols: EIF4A1, RH4, TIF4A1 | eukaryotic translation initiation factor 4A1 | chr3:4592635-4594128 REVERSE L	7	3	3	3	2	3	3	2	3	3	3	3	2	3	3	2	3	3	3	3	2	3	3	2	3	3	3	3	9.7	9.7	9.7	45.7	402	402;412;412;414;415;407;407	1	26	0	20	By matching	By MS/MS	By MS/MS	By matching	By MS/MS	By MS/MS
AT1G54780.1	AT1G54780.1	3	3	3	>AT1G54780.1 | Symbols: TLP18.3 | thylakoid lumen 18.3 kDa protein | chr1:20439533-20440953 FORWARD LENGTH=285	1	3	3	3	0	3	3	3	2	3	3	3	0	3	3	3	2	3	3	3	0	3	3	3	2	3	3	3	14	14	14	31.138	285	285	1	20	0	24.004	By matching	By MS/MS	By MS/MS	By MS/MS	By MS/MS	By MS/MS
AT1G55160.2;AT1G55160.1;AT1G55160.3	AT1G55160.2;AT1G55160.1;AT1G55160.3	2;2;2	2;2;2	2;2;2	>AT1G55160.2 | Symbols: | unknown protein; FUNCTIONS IN: molecular_function unknown; INVOLVED IN: biological_process unknown; LOCATED IN: mitochondrion, plastid; EXPRESSED IN: 22 plant structures; EXPRESSED DURING: 13 growth stages; BEST Arabidopsis thali	3	2	2	2	0	1	2	2	1	2	2	2	0	1	2	2	1	2	2	2	0	1	2	2	1	2	2	2	19	19	19	15.423	137	137;188;213	1	12	0	12.561	By matching	By matching	By MS/MS	By MS/MS	By matching	By MS/MS
AT1G55210.2;AT1G55210.1;AT3G13660.1	AT1G55210.2;AT1G55210.1;AT3G13660.1	2;2;1	2;2;1	2;2;1	>AT1G55210.2 | Symbols: | Disease resistance-responsive (dirigent-like protein) family protein | chr1:20598057-20598620 REVERSE LENGTH=187;>AT1G55210.1 | Symbols: | Disease resistance-responsive (dirigent-like protein) family protein | chr1:20598057-2059	3	2	2	2	2	2	2	2	2	2	2	2	2	2	2	2	2	2	2	2	2	2	2	2	2	2	2	2	13.4	13.4	13.4	20.618	187	187;187;125	1	23	0	13.672	By MS/MS	By matching	By MS/MS	By matching	By MS/MS	By MS/MS
AT3G13470.1;AT1G55490.2;AT1G55490.1;AT5G56500.2;AT5G56500.1	AT3G13470.1;AT1G55490.2;AT1G55490.1;AT5G56500.2;AT5G56500.1	5;5;5;4;4	5;5;5;4;4	5;5;5;4;4	>AT3G13470.1 | Symbols: | TCP-1/cpn60 chaperonin family protein | chr3:4389685-4392624 FORWARD LENGTH=596;>AT1G55490.2 | Symbols: CPN60B, LEN1 | chaperonin 60 beta | chr1:20715717-20718673 REVERSE LENGTH=600;>AT1G55490.1 | Symbols: CPN60B, LEN1 | chaperon	5	5	5	5	1	5	4	4	4	5	5	5	1	5	4	4	4	5	5	5	1	5	4	4	4	5	5	5	11.2	11.2	11.2	63.341	596	596;600;600;597;597	1	33	0	46.744	By matching	By MS/MS	By MS/MS	By MS/MS	By MS/MS	By MS/MS
AT1G56070.1;AT3G12915.2;AT3G12915.1	AT1G56070.1	12;4;4	12;4;4	12;4;4	>AT1G56070.1 | Symbols: LOS1 | Ribosomal protein S5/Elongation factor G/III/V family protein | chr1:20968245-20971077 REVERSE LENGTH=843	3	12	12	12	0	3	8	7	7	12	11	12	0	3	8	7	7	12	11	12	0	3	8	7	7	12	11	12	19.2	19.2	19.2	93.89	843	843;767;820	1	60	0	113.58	By matching	By matching	By MS/MS	By MS/MS	By MS/MS	By MS/MS
AT1G56110.1;AT3G12860.1	AT1G56110.1;AT3G12860.1	2;1	2;1	2;1	>AT1G56110.1 | Symbols: NOP56 | homolog of nucleolar protein NOP56 | chr1:20984544-20986893 REVERSE LENGTH=522;>AT3G12860.1 | Symbols: | NOP56-like pre RNA processing ribonucleoprotein | chr3:4091678-4093921 FORWARD LENGTH=499	2	2	2	2	0	1	2	2	1	2	2	2	0	1	2	2	1	2	2	2	0	1	2	2	1	2	2	2	3.6	3.6	3.6	58.673	522	522;499	1	12	0	11.364	By matching	By matching	By MS/MS	By MS/MS	By matching	By MS/MS
AT1G60550.1	AT1G60550.1	6	6	6	>AT1G60550.1 | Symbols: ECHID, DHNS | enoyl-CoA hydratase/isomerase D | chr1:22305988-22308092 REVERSE LENGTH=337	1	6	6	6	0	2	4	4	1	4	4	4	0	2	4	4	1	4	4	4	0	2	4	4	1	4	4	4	20.5	20.5	20.5	37.056	337	337	1	29	0	39.227	By matching	By MS/MS	By MS/MS	By MS/MS	By matching	By MS/MS
AT1G61520.2;AT1G61520.3;AT1G61520.1	AT1G61520.2;AT1G61520.3;AT1G61520.1	2;2;2	2;2;2	2;2;2	>AT1G61520.2 | Symbols: LHCA3 | photosystem I light harvesting complex gene 3 | chr1:22700493-22701149 FORWARD LENGTH=218;>AT1G61520.3 | Symbols: LHCA3 | photosystem I light harvesting complex gene 3 | chr1:22700152-22701149 FORWARD LENGTH=273;>AT1G61520.1	3	2	2	2	2	1	2	1	1	1	1	2	2	1	2	1	1	1	1	2	2	1	2	1	1	1	1	2	19.7	19.7	19.7	23.746	218	218;273;273	1	17	0	18.753	By MS/MS	By MS/MS	By MS/MS	By MS/MS	By MS/MS	By MS/MS
AT1G61620.1	AT1G61620.1	3	3	3	>AT1G61620.1 | Symbols: | phosphoinositide binding | chr1:22737653-22739209 FORWARD LENGTH=310	1	3	3	3	0	1	2	2	0	2	3	3	0	1	2	2	0	2	3	3	0	1	2	2	0	2	3	3	11.9	11.9	11.9	35.023	310	310	1	13	0	18.593	By matching	By matching	By matching	By matching	By matching	By MS/MS
AT1G61730.1	AT1G61730.1	5	5	5	>AT1G61730.1 | Symbols: | DNA-binding storekeeper protein-related transcriptional regulator | chr1:22793447-22794577 REVERSE LENGTH=376	1	5	5	5	1	2	2	3	3	3	4	5	1	2	2	3	3	3	4	5	1	2	2	3	3	3	4	5	13.3	13.3	13.3	40.879	376	376	1	36	0	38.836	By matching	By matching	By MS/MS	By MS/MS	By MS/MS	By MS/MS
AT1G65590.1	AT1G65590.1	9	9	9	>AT1G65590.1 | Symbols: HEXO3, ATHEX1 | beta-hexosaminidase 3 | chr1:24385996-24390989 FORWARD LENGTH=535	1	9	9	9	3	6	9	9	7	8	9	9	3	6	9	9	7	8	9	9	3	6	9	9	7	8	9	9	20.4	20.4	20.4	60.013	535	535	1	60	0	120.36	By matching	By MS/MS	By MS/MS	By MS/MS	By MS/MS	By MS/MS
AT1G65870.1;AT5G42500.1;AT3G58090.1	AT1G65870.1	4;1;1	4;1;1	4;1;1	>AT1G65870.1 | Symbols: | Disease resistance-responsive (dirigent-like protein) family protein | chr1:24503624-24504193 FORWARD LENGTH=189	3	4	4	4	0	2	2	2	2	3	4	4	0	2	2	2	2	3	4	4	0	2	2	2	2	3	4	4	25.9	25.9	25.9	20.395	189	189;185;271	1	19	0	22.726	By matching	By matching	By MS/MS	By matching	By matching	By MS/MS
AT1G67090.1;AT5G38410.2;AT1G67090.2	AT1G67090.1	6;2;1	6;2;1	3;0;1	>AT1G67090.1 | Symbols: RBCS1A | ribulose bisphosphate carboxylase small chain 1A | chr1:25048465-25049249 REVERSE LENGTH=180	3	6	6	3	3	5	5	6	3	5	6	5	3	5	5	6	3	5	6	5	0	2	2	3	1	2	3	2	41.7	41.7	20.6	20.216	180	180;174;136	1	39	0	124.4	By MS/MS	By MS/MS	By MS/MS	By MS/MS	By MS/MS	By MS/MS
AT1G67230.1	AT1G67230.1	4	4	4	>AT1G67230.1 | Symbols: LINC1 | little nuclei1 | chr1:25151561-25156032 REVERSE LENGTH=1132	1	4	4	4	0	1	4	4	1	3	4	4	0	1	4	4	1	3	4	4	0	1	4	4	1	3	4	4	4.5	4.5	4.5	129.09	1132	1132	1	21	0	31.866	By matching	By matching	By MS/MS	By matching	By MS/MS	By MS/MS
AT1G67700.3;AT1G67700.1;AT1G67700.2	AT1G67700.3;AT1G67700.1;AT1G67700.2	5;5;5	5;5;5	5;5;5	>AT1G67700.3 | Symbols: | unknown protein; FUNCTIONS IN: molecular_function unknown; INVOLVED IN: biological_process unknown; EXPRESSED IN: 22 plant structures; EXPRESSED DURING: 13 growth stages. | chr1:25374295-25375716 FORWARD LENGTH=229;>AT1G67700.1 |	3	5	5	5	1	2	3	4	2	5	5	4	1	2	3	4	2	5	5	4	1	2	3	4	2	5	5	4	26.6	26.6	26.6	25.911	229	229;230;231	1	33	0	141.84	By matching	By MS/MS	By MS/MS	By MS/MS	By MS/MS	By MS/MS
AT1G68260.1;AT1G35250.1;AT1G35290.1	AT1G68260.1	4;1;1	4;1;1	4;1;1	>AT1G68260.1 | Symbols: | Thioesterase superfamily protein | chr1:25585976-25587601 REVERSE LENGTH=190	3	4	4	4	0	1	4	3	4	4	3	4	0	1	4	3	4	4	3	4	0	1	4	3	4	4	3	4	25.8	25.8	25.8	21.54	190	190;188;189	1	27	0	36.682	By matching	By matching	By MS/MS	By MS/MS	By MS/MS	By MS/MS
AT1G68560.1;AT3G45940.1	AT1G68560.1	26;4	26;4	26;4	>AT1G68560.1 | Symbols: ATXYL1, XYL1, TRG1 | alpha-xylosidase 1 | chr1:25734435-25737897 REVERSE LENGTH=915	2	26	26	26	20	22	24	23	19	24	24	22	20	22	24	23	19	24	24	22	20	22	24	23	19	24	24	22	42	42	42	102.4	915	915;868	1	249	0	323.31	By MS/MS	By MS/MS	By MS/MS	By MS/MS	By MS/MS	By MS/MS
AT1G68830.1	AT1G68830.1	13	13	13	>AT1G68830.1 | Symbols: STN7 | STT7 homolog STN7 | chr1:25872654-25875473 REVERSE LENGTH=562	1	13	13	13	5	8	12	12	4	12	12	10	5	8	12	12	4	12	12	10	5	8	12	12	4	12	12	10	24.4	24.4	24.4	63.251	562	562	1	87	0	140.4	By matching	By MS/MS	By MS/MS	By MS/MS	By matching	By MS/MS
AT1G69200.1	AT1G69200.1	2	2	2	>AT1G69200.1 | Symbols: FLN2 | fructokinase-like 2 | chr1:26016018-26018365 FORWARD LENGTH=616	1	2	2	2	0	0	0	1	0	0	2	2	0	0	0	1	0	0	2	2	0	0	0	1	0	0	2	2	3.9	3.9	3.9	69.258	616	616	1	5	0	13.833	By matching	By matching	By matching	By matching	By matching	By matching
AT1G72150.1	AT1G72150.1	2	2	2	>AT1G72150.1 | Symbols: PATL1 | PATELLIN 1 | chr1:27148558-27150652 FORWARD LENGTH=573	1	2	2	2	0	2	1	1	0	2	2	2	0	2	1	1	0	2	2	2	0	2	1	1	0	2	2	2	4.4	4.4	4.4	64.046	573	573	1	10	0	13.277	By matching	By matching	By matching	By matching	By matching	By MS/MS
AT1G72610.1	AT1G72610.1	5	5	5	>AT1G72610.1 | Symbols: GLP1, ATGER1, GER1 | germin-like protein 1 | chr1:27339302-27339928 REVERSE LENGTH=208	1	5	5	5	2	3	5	5	2	4	4	5	2	3	5	5	2	4	4	5	2	3	5	5	2	4	4	5	12.5	12.5	12.5	21.559	208	208	1	37	0	55.119	By MS/MS	By MS/MS	By MS/MS	By MS/MS	By MS/MS	By MS/MS
AT1G72970.2;AT1G72970.1;AT5G51950.2;AT5G51930.1;AT5G51950.1	AT1G72970.2;AT1G72970.1	8;8;1;1;1	8;8;1;1;1	8;8;1;1;1	>AT1G72970.2 | Symbols: HTH, EDA17 | Glucose-methanol-choline (GMC) oxidoreductase family protein | chr1:27452872-27455706 FORWARD LENGTH=567;>AT1G72970.1 | Symbols: HTH, EDA17 | Glucose-methanol-choline (GMC) oxidoreductase family protein | chr1:27452872-	5	8	8	8	3	5	8	8	1	5	8	6	3	5	8	8	1	5	8	6	3	5	8	8	1	5	8	6	17.3	17.3	17.3	62.209	567	567;594;553;582;586	1	45	0	136.99	By matching	By MS/MS	By MS/MS	By MS/MS	By MS/MS	By MS/MS
AT1G74470.1	AT1G74470.1	2	2	2	>AT1G74470.1 | Symbols: | Pyridine nucleotide-disulphide oxidoreductase family protein | chr1:27991248-27992845 FORWARD LENGTH=467	1	2	2	2	1	2	2	2	1	2	2	2	1	2	2	2	1	2	2	2	1	2	2	2	1	2	2	2	5.1	5.1	5.1	51.837	467	467	1	14	0	13.213	By matching	By MS/MS	By MS/MS	By MS/MS	By matching	By MS/MS
AT1G75750.2;AT1G75750.1	AT1G75750.2;AT1G75750.1	3;3	3;3	3;3	>AT1G75750.2 | Symbols: GASA1 | GAST1 protein homolog 1 | chr1:28441813-28442284 REVERSE LENGTH=97;>AT1G75750.1 | Symbols: GASA1 | GAST1 protein homolog 1 | chr1:28441813-28442284 REVERSE LENGTH=98	2	3	3	3	0	0	3	3	0	1	3	3	0	0	3	3	0	1	3	3	0	0	3	3	0	1	3	3	24.7	24.7	24.7	10.645	97	97;98	1	13	0	18.861	By matching	By matching	By MS/MS	By MS/MS	By matching	By matching
AT1G77180.3;AT1G77180.2;AT1G77180.1	AT1G77180.3;AT1G77180.2;AT1G77180.1	5;5;5	5;5;5	5;5;5	>AT1G77180.3 | Symbols: SKIP | chromatin protein family | chr1:28999791-29001632 REVERSE LENGTH=511;>AT1G77180.2 | Symbols: SKIP | chromatin protein family | chr1:28999791-29001632 REVERSE LENGTH=613;>AT1G77180.1 | Symbols: SKIP | chromatin protein family	3	5	5	5	0	1	5	3	1	3	5	5	0	1	5	3	1	3	5	5	0	1	5	3	1	3	5	5	15.1	15.1	15.1	57.726	511	511;613;613	1	23	0	35.707	By matching	By matching	By MS/MS	By MS/MS	By matching	By MS/MS
AT1G77590.1	AT1G77590.1	2	2	2	>AT1G77590.1 | Symbols: LACS9 | long chain acyl-CoA synthetase 9 | chr1:29148501-29151776 REVERSE LENGTH=691	1	2	2	2	0	2	2	2	0	2	2	2	0	2	2	2	0	2	2	2	0	2	2	2	0	2	2	2	4.3	4.3	4.3	76.175	691	691	1	12	0	14.145	By matching	By matching	By MS/MS	By MS/MS	By matching	By MS/MS
AT1G78060.1	AT1G78060.1	8	8	8	>AT1G78060.1 | Symbols: | Glycosyl hydrolase family protein | chr1:29349796-29352868 REVERSE LENGTH=767	1	8	8	8	0	6	7	6	2	5	7	6	0	6	7	6	2	5	7	6	0	6	7	6	2	5	7	6	12.4	12.4	12.4	83.891	767	767	1	39	0	49.343	By matching	By MS/MS	By MS/MS	By MS/MS	By matching	By MS/MS
AT1G78820.1	AT1G78820.1	3	2	2	>AT1G78820.1 | Symbols: | D-mannose binding lectin protein with Apple-like carbohydrate-binding domain | chr1:29634401-29635768 REVERSE LENGTH=455	1	3	2	2	0	2	2	3	3	3	3	3	0	1	1	2	2	2	2	2	0	1	1	2	2	2	2	2	13.2	7.7	7.7	50.594	455	455	1	12	0	24.907	By matching	By matching	By matching	By matching	By MS/MS	By MS/MS
AT1G78830.1	AT1G78830.1	8	8	7	>AT1G78830.1 | Symbols: | Curculin-like (mannose-binding) lectin family protein | chr1:29637141-29638508 REVERSE LENGTH=455	1	8	8	7	1	3	5	5	5	5	8	5	1	3	5	5	5	5	8	5	1	2	4	4	4	4	7	4	26.4	26.4	20.9	50.342	455	455	1	37	0	103.07	By matching	By MS/MS	By MS/MS	By MS/MS	By MS/MS	By MS/MS
AT1G78850.1;AT1G78860.1	AT1G78850.1;AT1G78860.1	14;7	14;7	14;7	>AT1G78850.1 | Symbols: | D-mannose binding lectin protein with Apple-like carbohydrate-binding domain | chr1:29642072-29643397 REVERSE LENGTH=441;>AT1G78860.1 | Symbols: | D-mannose binding lectin protein with Apple-like carbohydrate-binding domain | ch	2	14	14	14	5	10	13	12	9	13	13	13	5	10	13	12	9	13	13	13	5	10	13	12	9	13	13	13	37.2	37.2	37.2	49.051	441	441;443	1	108	0	323.31	By MS/MS	By MS/MS	By MS/MS	By MS/MS	By MS/MS	By MS/MS
AT1G80410.1;AT1G80410.2	AT1G80410.1;AT1G80410.2	10;10	10;10	10;10	>AT1G80410.1 | Symbols: EMB2753 | tetratricopeptide repeat (TPR)-containing protein | chr1:30227963-30234832 REVERSE LENGTH=897;>AT1G80410.2 | Symbols: EMB2753 | tetratricopeptide repeat (TPR)-containing protein | chr1:30227779-30234832 REVERSE LENGTH=911	2	10	10	10	0	5	5	9	6	8	9	8	0	5	5	9	6	8	9	8	0	5	5	9	6	8	9	8	14	14	14	102.15	897	897;911	1	53	0	82.842	By matching	By MS/MS	By MS/MS	By MS/MS	By MS/MS	By MS/MS
AT2G01140.1	AT2G01140.1	5	3	3	>AT2G01140.1 | Symbols: | Aldolase superfamily protein | chr2:95006-96491 REVERSE LENGTH=391	1	5	3	3	2	1	4	4	1	4	5	4	0	0	2	2	0	2	3	2	0	0	2	2	0	2	3	2	13.3	9	9	42.327	391	391	1	11	0	19.218	By matching	By matching	By MS/MS	By matching	By matching	By MS/MS
AT2G01720.1	AT2G01720.1	3	3	3	>AT2G01720.1 | Symbols: | Ribophorin I | chr2:317193-320016 REVERSE LENGTH=464	1	3	3	3	0	2	2	2	1	3	3	3	0	2	2	2	1	3	3	3	0	2	2	2	1	3	3	3	12.9	12.9	12.9	52.218	464	464	1	16	0	16.44	By matching	By matching	By matching	By matching	By matching	By MS/MS
AT2G02740.2;AT2G02740.1	AT2G02740.2;AT2G02740.1	6;6	6;6	5;5	>AT2G02740.2 | Symbols: ATWHY3, PTAC11, WHY3 | ssDNA-binding transcriptional regulator | chr2:769389-770993 FORWARD LENGTH=267;>AT2G02740.1 | Symbols: ATWHY3, PTAC11, WHY3 | ssDNA-binding transcriptional regulator | chr2:769389-770993 FORWARD LENGTH=268	2	6	6	5	0	2	4	5	4	6	6	6	0	2	4	5	4	6	6	6	0	2	4	4	3	5	5	5	27	27	22.8	29.64	267	267;268	1	33	0	59.179	By matching	By matching	By matching	By MS/MS	By MS/MS	By MS/MS
AT2G04842.1	AT2G04842.1	6	6	6	>AT2G04842.1 | Symbols: EMB2761 | threonyl-tRNA synthetase, putative / threonine--tRNA ligase, putative | chr2:1698466-1701271 REVERSE LENGTH=650	1	6	6	6	0	2	4	4	3	6	5	5	0	2	4	4	3	6	5	5	0	2	4	4	3	6	5	5	10.9	10.9	10.9	74.784	650	650	1	29	0	43.743	By matching	By matching	By MS/MS	By MS/MS	By MS/MS	By MS/MS
AT2G05920.1	AT2G05920.1	13	13	13	>AT2G05920.1 | Symbols: | Subtilase family protein | chr2:2269831-2272207 REVERSE LENGTH=754	1	13	13	13	3	11	13	13	5	7	11	9	3	11	13	13	5	7	11	9	3	11	13	13	5	7	11	9	26.9	26.9	26.9	80.014	754	754	1	81	0	168.2	By matching	By MS/MS	By MS/MS	By MS/MS	By MS/MS	By MS/MS
AT2G06850.1;AT5G13870.1	AT2G06850.1	13;2	13;2	13;2	>AT2G06850.1 | Symbols: EXGT-A1, EXT, XTH4 | xyloglucan endotransglucosylase/hydrolase 4 | chr2:2763619-2765490 FORWARD LENGTH=296	2	13	13	13	6	11	13	13	7	12	13	11	6	11	13	13	7	12	13	11	6	11	13	13	7	12	13	11	46.3	46.3	46.3	34.291	296	296;293	1	111	0	170.25	By MS/MS	By MS/MS	By MS/MS	By MS/MS	By MS/MS	By MS/MS
AT2G10940.2;AT2G10940.1	AT2G10940.2;AT2G10940.1	3;3	3;3	3;3	>AT2G10940.2 | Symbols: | Bifunctional inhibitor/lipid-transfer protein/seed storage 2S albumin superfamily protein | chr2:4311160-4312035 REVERSE LENGTH=291;>AT2G10940.1 | Symbols: | Bifunctional inhibitor/lipid-transfer protein/seed storage 2S albumin	2	3	3	3	1	2	3	3	2	3	3	3	1	2	3	3	2	3	3	3	1	2	3	3	2	3	3	3	11	11	11	29.648	291	291;291	1	21	0	27.187	By MS/MS	By MS/MS	By MS/MS	By MS/MS	By MS/MS	By MS/MS
AT2G16860.1	AT2G16860.1	2	2	2	>AT2G16860.1 | Symbols: | GCIP-interacting family protein | chr2:7304139-7305959 REVERSE LENGTH=298	1	2	2	2	0	0	1	2	0	0	2	2	0	0	1	2	0	0	2	2	0	0	1	2	0	0	2	2	6.7	6.7	6.7	35.17	298	298	1	7	0	11.351	By matching	By matching	By matching	By matching	By matching	By matching
AT2G18510.1	AT2G18510.1	4	4	4	>AT2G18510.1 | Symbols: emb2444 | RNA-binding (RRM/RBD/RNP motifs) family protein | chr2:8031554-8033517 REVERSE LENGTH=363	1	4	4	4	0	1	2	4	2	4	3	4	0	1	2	4	2	4	3	4	0	1	2	4	2	4	3	4	14.3	14.3	14.3	39.888	363	363	1	20	0	33.383	By matching	By matching	By MS/MS	By MS/MS	By MS/MS	By MS/MS
AT2G18740.2;AT4G30330.1;AT2G18740.1	AT2G18740.2;AT4G30330.1;AT2G18740.1	2;2;2	2;2;2	2;2;2	>AT2G18740.2 | Symbols: | Small nuclear ribonucleoprotein family protein | chr2:8123334-8124581 FORWARD LENGTH=78;>AT4G30330.1 | Symbols: | Small nuclear ribonucleoprotein family protein | chr4:14836773-14837919 REVERSE LENGTH=88;>AT2G18740.1 | Symbols:	3	2	2	2	2	2	2	2	2	2	2	2	2	2	2	2	2	2	2	2	2	2	2	2	2	2	2	2	25.6	25.6	25.6	9.2547	78	78;88;88	1	24	0	71.616	By MS/MS	By MS/MS	By MS/MS	By MS/MS	By MS/MS	By MS/MS
AT2G19520.1;AT4G29730.1	AT2G19520.1	5;1	5;1	5;1	>AT2G19520.1 | Symbols: FVE, ACG1, MSI4, NFC4, NFC04, ATMSI4 | Transducin family protein / WD-40 repeat family protein | chr2:8456006-8459235 FORWARD LENGTH=507	2	5	5	5	0	2	3	4	0	3	4	5	0	2	3	4	0	3	4	5	0	2	3	4	0	3	4	5	15.2	15.2	15.2	55.758	507	507;487	1	25	0	45.52	By matching	By matching	By matching	By MS/MS	By matching	By MS/MS
AT2G20990.1;AT2G20990.2;AT2G20990.3;AT2G21010.1	AT2G20990.1;AT2G20990.2;AT2G20990.3	4;4;4;1	4;4;4;1	4;4;4;1	>AT2G20990.1 | Symbols: SYTA, NTMC2TYPE1.1, ATSYTA, NTMC2T1.1, SYT1 | synaptotagmin A | chr2:9014827-9017829 FORWARD LENGTH=541;>AT2G20990.2 | Symbols: SYTA | synaptotagmin A | chr2:9014827-9017829 FORWARD LENGTH=565;>AT2G20990.3 | Symbols: SYTA | synaptot	4	4	4	4	0	2	3	4	1	2	3	2	0	2	3	4	1	2	3	2	0	2	3	4	1	2	3	2	7.9	7.9	7.9	61.743	541	541;565;579;256	1	17	0	22.887	By matching	By matching	By matching	By MS/MS	By matching	By MS/MS
AT2G21330.1;AT2G21330.3;AT2G21330.2	AT2G21330.1;AT2G21330.3;AT2G21330.2	12;11;7	6;6;4	5;5;4	>AT2G21330.1 | Symbols: FBA1 | fructose-bisphosphate aldolase 1 | chr2:9128416-9130152 REVERSE LENGTH=399;>AT2G21330.3 | Symbols: FBA1 | fructose-bisphosphate aldolase 1 | chr2:9128416-9130152 REVERSE LENGTH=389;>AT2G21330.2 | Symbols: FBA1 | fructose-bisp	3	12	6	5	7	6	11	11	9	11	12	11	3	4	5	5	4	5	6	5	3	4	4	4	4	5	5	4	39.1	23.8	21.3	42.93	399	399;389;311	1	45	0	132.01	By matching	By MS/MS	By MS/MS	By MS/MS	By MS/MS	By MS/MS
AT2G21660.2;AT2G21660.1	AT2G21660.2;AT2G21660.1	3;3	3;3	2;2	>AT2G21660.2 | Symbols: ATGRP7, CCR2 | cold, circadian rhythm, and rna binding 2 | chr2:9265477-9266316 REVERSE LENGTH=159;>AT2G21660.1 | Symbols: ATGRP7, CCR2, GR-RBP7, GRP7 | cold, circadian rhythm, and rna binding 2 | chr2:9265477-9266316 REVERSE LENGTH	2	3	3	2	0	2	3	2	2	3	3	3	0	2	3	2	2	3	3	3	0	1	2	1	1	2	2	2	23.3	23.3	16.4	15.548	159	159;176	1	25	0	199.7	By matching	By MS/MS	By MS/MS	By MS/MS	By MS/MS	By MS/MS
AT2G22230.1;AT5G10160.1	AT2G22230.1	3;1	3;1	3;1	>AT2G22230.1 | Symbols: | Thioesterase superfamily protein | chr2:9450042-9451427 FORWARD LENGTH=220	2	3	3	3	0	2	2	2	2	3	3	3	0	2	2	2	2	3	3	3	0	2	2	2	2	3	3	3	18.2	18.2	18.2	24.242	220	220;219	1	21	0	21.317	By matching	By matching	By matching	By matching	By MS/MS	By MS/MS
AT2G22360.1	AT2G22360.1	17	17	11	>AT2G22360.1 | Symbols: | DNAJ heat shock family protein | chr2:9498162-9500459 FORWARD LENGTH=442	1	17	17	11	3	6	11	14	11	13	16	16	3	6	11	14	11	13	16	16	2	5	7	9	9	8	11	10	36.9	36.9	28.5	47.761	442	442	1	116	0	214.26	By matching	By MS/MS	By MS/MS	By MS/MS	By MS/MS	By MS/MS
AT2G24060.1	AT2G24060.1	4	3	3	>AT2G24060.1 | Symbols: | Translation initiation factor 3 protein | chr2:10229453-10231390 FORWARD LENGTH=312	1	4	3	3	0	2	2	1	3	4	4	4	0	1	1	0	2	3	3	3	0	1	1	0	2	3	3	3	16	13.5	13.5	35.141	312	312	1	16	0	22.757	By matching	By matching	By matching	By matching	By MS/MS	By MS/MS
AT2G24280.1	AT2G24280.1	2	2	2	>AT2G24280.1 | Symbols: | alpha/beta-Hydrolases superfamily protein | chr2:10334622-10336927 FORWARD LENGTH=494	1	2	2	2	0	1	2	2	1	1	2	2	0	1	2	2	1	1	2	2	0	1	2	2	1	1	2	2	3.6	3.6	3.6	56.232	494	494	1	17	0	11.539	By matching	By MS/MS	By MS/MS	By MS/MS	By MS/MS	By MS/MS
AT2G25110.1	AT2G25110.1	2	2	2	>AT2G25110.1 | Symbols: SDF2, ATSDL, AtSDF2 | stromal cell-derived factor 2-like protein precursor | chr2:10684428-10685838 FORWARD LENGTH=218	1	2	2	2	0	1	2	2	0	2	2	2	0	1	2	2	0	2	2	2	0	1	2	2	0	2	2	2	11	11	11	23.935	218	218	1	11	0	32.558	By matching	By matching	By MS/MS	By MS/MS	By matching	By MS/MS
AT2G27100.1	AT2G27100.1	12	12	12	>AT2G27100.1 | Symbols: SE | C2H2 zinc-finger protein SERRATE (SE) | chr2:11572587-11576357 FORWARD LENGTH=720	1	12	12	12	0	3	6	7	5	10	12	10	0	3	6	7	5	10	12	10	0	3	6	7	5	10	12	10	21.9	21.9	21.9	81.097	720	720	1	57	0	118.12	By matching	By MS/MS	By MS/MS	By MS/MS	By MS/MS	By MS/MS
AT2G27170.2;AT2G27170.1	AT2G27170.2;AT2G27170.1	2;2	2;2	2;2	>AT2G27170.2 | Symbols: TTN7, SMC3 | Structural maintenance of chromosomes (SMC) family protein | chr2:11609319-11617064 REVERSE LENGTH=1204;>AT2G27170.1 | Symbols: TTN7, SMC3 | Structural maintenance of chromosomes (SMC) family protein | chr2:11609319-116	2	2	2	2	0	1	2	2	1	2	2	1	0	1	2	2	1	2	2	1	0	1	2	2	1	2	2	1	1.7	1.7	1.7	139.37	1204	1204;1204	1	11	0	10.82	By matching	By matching	By matching	By matching	By matching	By MS/MS
AT2G28000.1	AT2G28000.1	9	9	9	>AT2G28000.1 | Symbols: CPN60A, CH-CPN60A, SLP | chaperonin-60alpha | chr2:11926603-11929184 FORWARD LENGTH=586	1	9	9	9	0	6	9	6	3	8	9	8	0	6	9	6	3	8	9	8	0	6	9	6	3	8	9	8	18.8	18.8	18.8	62.071	586	586	1	49	0	53.987	By matching	By MS/MS	By MS/MS	By MS/MS	By matching	By MS/MS
AT2G30620.1;AT2G30620.2;AT1G06760.1	AT2G30620.1;AT2G30620.2	4;3;1	4;3;1	4;3;1	>AT2G30620.1 | Symbols: | winged-helix DNA-binding transcription factor family protein | chr2:13045360-13046267 FORWARD LENGTH=273;>AT2G30620.2 | Symbols: | winged-helix DNA-binding transcription factor family protein | chr2:13045360-13046267 FORWARD LEN	3	4	4	4	1	1	3	4	0	2	3	4	1	1	3	4	0	2	3	4	1	1	3	4	0	2	3	4	19	19	19	28.487	273	273;202;274	1	19	0	52.835	By matching	By matching	By MS/MS	By MS/MS	By matching	By MS/MS
AT2G31810.3;AT2G31810.1;AT2G31810.2	AT2G31810.3;AT2G31810.1;AT2G31810.2	4;4;3	4;4;3	4;4;3	>AT2G31810.3 | Symbols: | ACT domain-containing small subunit of acetolactate synthase protein | chr2:13524271-13528246 FORWARD LENGTH=469;>AT2G31810.1 | Symbols: | ACT domain-containing small subunit of acetolactate synthase protein | chr2:13524271-1352	3	4	4	4	0	2	4	3	1	3	4	3	0	2	4	3	1	3	4	3	0	2	4	3	1	3	4	3	11.1	11.1	11.1	51.412	469	469;491;421	1	20	0	28.194	By matching	By MS/MS	By MS/MS	By MS/MS	By MS/MS	By matching
AT2G32600.1	AT2G32600.1	3	3	3	>AT2G32600.1 | Symbols: | hydroxyproline-rich glycoprotein family protein | chr2:13833779-13835525 REVERSE LENGTH=277	1	3	3	3	1	2	2	3	2	3	3	3	1	2	2	3	2	3	3	3	1	2	2	3	2	3	3	3	13.4	13.4	13.4	31.369	277	277	1	19	0	21.442	By matching	By matching	By matching	By MS/MS	By matching	By MS/MS
AT2G32920.1	AT2G32920.1	5	5	5	>AT2G32920.1 | Symbols: ATPDIL2-3, PDI9, ATPDI9, PDIL2-3 | PDI-like 2-3 | chr2:13962502-13965406 REVERSE LENGTH=440	1	5	5	5	1	3	4	2	3	5	5	5	1	3	4	2	3	5	5	5	1	3	4	2	3	5	5	5	16.8	16.8	16.8	47.754	440	440	1	28	0	55.374	By matching	By matching	By matching	By MS/MS	By MS/MS	By MS/MS
AT2G33150.1	AT2G33150.1	4	4	4	>AT2G33150.1 | Symbols: PKT3, PED1, KAT2 | peroxisomal 3-ketoacyl-CoA thiolase 3 | chr2:14047814-14050983 REVERSE LENGTH=462	1	4	4	4	0	2	3	1	4	2	4	2	0	2	3	1	4	2	4	2	0	2	3	1	4	2	4	2	17.1	17.1	17.1	48.578	462	462	1	18	0	49.927	By matching	By matching	By matching	By matching	By MS/MS	By MS/MS
AT2G33340.2;AT2G33340.1;AT2G33340.3	AT2G33340.2;AT2G33340.1;AT2G33340.3	9;9;8	9;9;8	8;8;7	>AT2G33340.2 | Symbols: MAC3B | MOS4-associated complex 3B | chr2:14126584-14131000 REVERSE LENGTH=525;>AT2G33340.1 | Symbols: MAC3B | MOS4-associated complex 3B | chr2:14126584-14131000 REVERSE LENGTH=525;>AT2G33340.3 | Symbols: MAC3B | MOS4-associated	3	9	9	8	2	4	6	6	5	9	9	9	2	4	6	6	5	9	9	9	1	4	5	5	4	8	8	8	26.5	26.5	24.4	56.727	525	525;525;485	1	59	0	147.04	By matching	By MS/MS	By MS/MS	By MS/MS	By MS/MS	By MS/MS
AT2G33530.1	AT2G33530.1	8	8	8	>AT2G33530.1 | Symbols: scpl46 | serine carboxypeptidase-like 46 | chr2:14197866-14200536 REVERSE LENGTH=465	1	8	8	8	1	4	8	7	4	7	7	7	1	4	8	7	4	7	7	7	1	4	8	7	4	7	7	7	21.5	21.5	21.5	51.883	465	465	1	45	0	76	By matching	By MS/MS	By MS/MS	By MS/MS	By MS/MS	By MS/MS
AT2G33730.1	AT2G33730.1	4	4	4	>AT2G33730.1 | Symbols: | P-loop containing nucleoside triphosphate hydrolases superfamily protein | chr2:14265679-14267880 REVERSE LENGTH=733	1	4	4	4	0	2	3	4	0	4	4	4	0	2	3	4	0	4	4	4	0	2	3	4	0	4	4	4	6.8	6.8	6.8	85.276	733	733	1	21	0	31.014	By matching	By matching	By MS/MS	By MS/MS	By matching	By MS/MS
AT2G33800.1	AT2G33800.1	3	3	3	>AT2G33800.1 | Symbols: | Ribosomal protein S5 family protein | chr2:14300925-14302352 REVERSE LENGTH=303	1	3	3	3	0	1	3	3	0	2	3	3	0	1	3	3	0	2	3	3	0	1	3	3	0	2	3	3	13.5	13.5	13.5	32.645	303	303	1	18	0	23.072	By matching	By matching	By MS/MS	By MS/MS	By matching	By MS/MS
AT2G34040.2;AT2G34040.1;AT1G29030.1	AT2G34040.2;AT2G34040.1	5;5;1	5;5;1	5;5;1	>AT2G34040.2 | Symbols: | Apoptosis inhibitory protein 5 (API5) | chr2:14378571-14382246 REVERSE LENGTH=442;>AT2G34040.1 | Symbols: | Apoptosis inhibitory protein 5 (API5) | chr2:14377957-14382246 REVERSE LENGTH=553	3	5	5	5	0	4	4	4	3	5	4	4	0	4	4	4	3	5	4	4	0	4	4	4	3	5	4	4	16.1	16.1	16.1	50.049	442	442;553;556	1	28	0	44.74	By matching	By MS/MS	By MS/MS	By MS/MS	By MS/MS	By MS/MS
AT2G36460.1;AT2G36460.2	AT2G36460.1;AT2G36460.2	11;6	4;2	4;2	>AT2G36460.1 | Symbols: | Aldolase superfamily protein | chr2:15296929-15298387 REVERSE LENGTH=358;>AT2G36460.2 | Symbols: | Aldolase superfamily protein | chr2:15296929-15297732 REVERSE LENGTH=267	2	11	4	4	1	5	9	6	6	10	11	10	0	3	3	2	2	4	4	4	0	3	3	2	2	4	4	4	41.3	12.8	12.8	38.386	358	358;267	1	22	0	29.771	By matching	By matching	By MS/MS	By matching	By MS/MS	By MS/MS
AT2G37220.1	AT2G37220.1	3	2	2	>AT2G37220.1 | Symbols: | RNA-binding (RRM/RBD/RNP motifs) family protein | chr2:15634980-15636331 REVERSE LENGTH=289	1	3	2	2	0	1	2	2	3	3	3	3	0	1	2	1	2	2	2	2	0	1	2	1	2	2	2	2	12.8	9.7	9.7	30.718	289	289	1	12	0	133.92	By matching	By matching	By matching	By matching	By MS/MS	By MS/MS
AT2G38040.2;AT2G38040.1	AT2G38040.2;AT2G38040.1	15;15	15;15	15;15	>AT2G38040.2 | Symbols: CAC3 | acetyl Co-enzyme a carboxylase carboxyltransferase alpha subunit | chr2:15917612-15920749 FORWARD LENGTH=769;>AT2G38040.1 | Symbols: CAC3 | acetyl Co-enzyme a carboxylase carboxyltransferase alpha subunit | chr2:15917612-1592	2	15	15	15	0	9	10	10	7	9	15	15	0	9	10	10	7	9	15	15	0	9	10	10	7	9	15	15	24.1	24.1	24.1	85.305	769	769;769	1	81	0	111.71	By matching	By MS/MS	By MS/MS	By MS/MS	By MS/MS	By MS/MS
AT2G38540.1	AT2G38540.1	3	3	3	>AT2G38540.1 | Symbols: LP1, LTP1, ATLTP1 | lipid transfer protein 1 | chr2:16130418-16130893 FORWARD LENGTH=118	1	3	3	3	1	2	3	3	1	3	3	3	1	2	3	3	1	3	3	3	1	2	3	3	1	3	3	3	26.3	26.3	26.3	11.755	118	118	1	20	0	30.963	By matching	By matching	By MS/MS	By MS/MS	By matching	By MS/MS
AT2G38770.1	AT2G38770.1	2	2	2	>AT2G38770.1 | Symbols: EMB2765 | P-loop containing nucleoside triphosphate hydrolases superfamily protein | chr2:16203185-16210253 REVERSE LENGTH=1509	1	2	2	2	0	1	1	1	1	2	1	2	0	1	1	1	1	2	1	2	0	1	1	1	1	2	1	2	1.9	1.9	1.9	173.02	1509	1509	1	9	0	14.168	By matching	By matching	By matching	By matching	By matching	By MS/MS
AT2G39730.1;AT2G39730.3;AT2G39730.2	AT2G39730.1;AT2G39730.3;AT2G39730.2	20;19;19	20;19;19	20;19;19	>AT2G39730.1 | Symbols: RCA | rubisco activase | chr2:16570951-16573345 REVERSE LENGTH=474;>AT2G39730.3 | Symbols: RCA | rubisco activase | chr2:16571174-16573345 REVERSE LENGTH=441;>AT2G39730.2 | Symbols: RCA | rubisco activase | chr2:16571046-16573345 RE	3	20	20	20	9	18	19	17	17	19	18	19	9	18	19	17	17	19	18	19	9	18	19	17	17	19	18	19	61.6	61.6	61.6	51.981	474	474;441;446	1	237	0	323.31	By MS/MS	By MS/MS	By MS/MS	By MS/MS	By MS/MS	By MS/MS
AT2G39800.2;AT2G39800.3;AT2G39800.4;AT2G39800.1;AT3G55610.1;AT3G55610.2	AT2G39800.2;AT2G39800.3;AT2G39800.4;AT2G39800.1;AT3G55610.1	4;4;4;4;3;1	4;4;4;4;3;1	4;4;4;4;3;1	>AT2G39800.2 | Symbols: P5CS1, ATP5CS | delta1-pyrroline-5-carboxylate synthase 1 | chr2:16598516-16601976 REVERSE LENGTH=614;>AT2G39800.3 | Symbols: P5CS1 | delta1-pyrroline-5-carboxylate synthase 1 | chr2:16598516-16602939 REVERSE LENGTH=714;>AT2G39800.4	6	4	4	4	0	2	2	4	1	2	3	3	0	2	2	4	1	2	3	3	0	2	2	4	1	2	3	3	8.6	8.6	8.6	66.758	614	614;714;717;717;726;622	1	17	0	24.243	By matching	By matching	By MS/MS	By MS/MS	By matching	By MS/MS
AT2G40290.1;AT2G40290.3;AT2G40290.2	AT2G40290.1;AT2G40290.3;AT2G40290.2	6;4;4	6;4;4	6;4;4	>AT2G40290.1 | Symbols: | Eukaryotic translation initiation factor 2 subunit 1 | chr2:16829030-16830889 REVERSE LENGTH=344;>AT2G40290.3 | Symbols: | Eukaryotic translation initiation factor 2 subunit 1 | chr2:16829872-16830889 REVERSE LENGTH=241;>AT2G402	3	6	6	6	0	2	5	5	2	3	6	5	0	2	5	5	2	3	6	5	0	2	5	5	2	3	6	5	23	23	23	38.747	344	344;241;241	1	28	0	44.575	By matching	By matching	By matching	By MS/MS	By MS/MS	By MS/MS
AT2G41475.1	AT2G41475.1	2	2	2	>AT2G41475.1 | Symbols: | Embryo-specific protein 3, (ATS3) | chr2:17295259-17296329 REVERSE LENGTH=179	1	2	2	2	0	1	2	2	1	1	2	2	0	1	2	2	1	1	2	2	0	1	2	2	1	1	2	2	10.6	10.6	10.6	19.949	179	179	1	11	0	12.368	By matching	By matching	By matching	By MS/MS	By matching	By matching
AT2G42520.1;AT3G58570.1	AT2G42520.1;AT3G58570.1	11;7	11;7	6;2	>AT2G42520.1 | Symbols: | P-loop containing nucleoside triphosphate hydrolases superfamily protein | chr2:17705382-17708744 FORWARD LENGTH=633;>AT3G58570.1 | Symbols: | P-loop containing nucleoside triphosphate hydrolases superfamily protein | chr3:21657	2	11	11	6	1	5	7	9	5	8	10	7	1	5	7	9	5	8	10	7	0	3	5	5	3	4	6	4	19.9	19.9	11.2	67.625	633	633;646	1	53	0	70.824	By matching	By MS/MS	By MS/MS	By MS/MS	By MS/MS	By MS/MS
AT2G42910.1	AT2G42910.1	7	7	7	>AT2G42910.1 | Symbols: | Phosphoribosyltransferase family protein | chr2:17856396-17858394 FORWARD LENGTH=337	1	7	7	7	0	0	1	4	6	5	5	7	0	0	1	4	6	5	5	7	0	0	1	4	6	5	5	7	24	24	24	37.56	337	337	1	30	0	44.113	By matching	By matching	By matching	By matching	By MS/MS	By MS/MS
AT2G45180.1	AT2G45180.1	4	4	4	>AT2G45180.1 | Symbols: | Bifunctional inhibitor/lipid-transfer protein/seed storage 2S albumin superfamily protein | chr2:18626377-18626781 FORWARD LENGTH=134	1	4	4	4	1	1	2	4	2	4	4	3	1	1	2	4	2	4	4	3	1	1	2	4	2	4	4	3	32.1	32.1	32.1	13.955	134	134	1	21	0	27.932	By matching	By matching	By matching	By MS/MS	By matching	By MS/MS
AT2G45220.1	AT2G45220.1	2	2	2	>AT2G45220.1 | Symbols: | Plant invertase/pectin methylesterase inhibitor superfamily | chr2:18644281-18646394 REVERSE LENGTH=511	1	2	2	2	0	1	2	1	1	2	2	2	0	1	2	1	1	2	2	2	0	1	2	1	1	2	2	2	6.5	6.5	6.5	55.976	511	511	1	11	0	73.702	By matching	By MS/MS	By MS/MS	By MS/MS	By MS/MS	By MS/MS
AT2G45640.1;AT2G45640.2	AT2G45640.1;AT2G45640.2	3;2	3;2	3;2	>AT2G45640.1 | Symbols: SAP18, ATSAP18 | SIN3 associated polypeptide P18 | chr2:18799881-18801323 REVERSE LENGTH=152;>AT2G45640.2 | Symbols: SAP18 | SIN3 associated polypeptide P18 | chr2:18799881-18801323 REVERSE LENGTH=149	2	3	3	3	0	0	2	1	0	1	2	2	0	0	2	1	0	1	2	2	0	0	2	1	0	1	2	2	26.3	26.3	26.3	17.164	152	152;149	1	10	0	21.459	By matching	By matching	By MS/MS	By MS/MS	By matching	By matching
AT2G45740.3;AT2G45740.2;AT2G45740.1	AT2G45740.3;AT2G45740.2;AT2G45740.1	2;2;2	2;2;2	2;2;2	>AT2G45740.3 | Symbols: PEX11D | peroxin 11D | chr2:18839865-18841102 FORWARD LENGTH=236;>AT2G45740.2 | Symbols: PEX11D | peroxin 11D | chr2:18839865-18841102 FORWARD LENGTH=236;>AT2G45740.1 | Symbols: PEX11D | peroxin 11D | chr2:18839865-18841102 FORWARD	3	2	2	2	0	1	2	2	1	1	2	1	0	1	2	2	1	1	2	1	0	1	2	2	1	1	2	1	12.3	12.3	12.3	25.943	236	236;236;236	1	10	0	12.8	By matching	By matching	By MS/MS	By MS/MS	By MS/MS	By MS/MS
AT3G61240.2;AT3G61240.1;AT2G45810.1	AT3G61240.2;AT3G61240.1;AT2G45810.1	3;3;3	3;3;3	1;1;1	>AT3G61240.2 | Symbols: | DEA(D/H)-box RNA helicase family protein | chr3:22666590-22669154 FORWARD LENGTH=498;>AT3G61240.1 | Symbols: | DEA(D/H)-box RNA helicase family protein | chr3:22666590-22669154 FORWARD LENGTH=498;>AT2G45810.1 | Symbols: | DEA(D	3	3	3	1	1	1	2	3	1	1	3	3	1	1	2	3	1	1	3	3	0	0	1	1	0	0	1	1	5.8	5.8	1.6	56.774	498	498;498;528	1	19	0	17.359	By matching	By matching	By MS/MS	By MS/MS	By matching	By matching
AT2G45960.2;AT2G45960.1;AT2G45960.3;AT4G00430.2;AT3G61430.2;AT3G61430.1;AT1G01620.1;AT4G00430.1	AT2G45960.2;AT2G45960.1;AT2G45960.3;AT4G00430.2;AT3G61430.2;AT3G61430.1;AT1G01620.1;AT4G00430.1	4;4;4;2;2;2;2;2	4;4;4;2;2;2;2;2	4;4;4;2;2;2;2;2	>AT2G45960.2 | Symbols: PIP1B, TMP-A, ATHH2, PIP1;2 | plasma membrane intrinsic protein 1B | chr2:18910450-18911579 FORWARD LENGTH=274;>AT2G45960.1 | Symbols: PIP1B, TMP-A, ATHH2, PIP1;2 | plasma membrane intrinsic protein 1B | chr2:18910450-18911703 FORWA	8	4	4	4	1	1	4	3	2	3	4	4	1	1	4	3	2	3	4	4	1	1	4	3	2	3	4	4	16.8	16.8	16.8	29.132	274	274;286;301;219;286;286;286;287	1	25	0	24.014	By matching	By matching	By MS/MS	By MS/MS	By matching	By matching
AT2G47470.3;AT2G47470.1;AT2G47470.4;AT2G47470.2	AT2G47470.3;AT2G47470.1;AT2G47470.4	5;5;4;2	5;5;4;2	5;5;4;2	>AT2G47470.3 | Symbols: ATPDIL2-1, UNE5, MEE30, PDI11, ATPDI11 | thioredoxin family protein | chr2:19481503-19483571 FORWARD LENGTH=323;>AT2G47470.1 | Symbols: ATPDIL2-1, UNE5, MEE30, PDI11, ATPDI11 | thioredoxin family protein | chr2:19481503-19483683 FOR	4	5	5	5	0	3	4	3	2	4	5	3	0	3	4	3	2	4	5	3	0	3	4	3	2	4	5	3	18.3	18.3	18.3	35.62	323	323;361;335;266	1	24	0	29.178	By matching	By matching	By MS/MS	By MS/MS	By matching	By MS/MS
AT2G47580.1	AT2G47580.1	3	3	3	>AT2G47580.1 | Symbols: U1A | spliceosomal protein U1A | chr2:19517229-19518686 FORWARD LENGTH=250	1	3	3	3	2	3	3	3	2	3	3	3	2	3	3	3	2	3	3	3	2	3	3	3	2	3	3	3	12.4	12.4	12.4	28.074	250	250	1	26	0	18.335	By matching	By matching	By matching	By matching	By MS/MS	By MS/MS
AT3G01500.1;AT3G01500.3;AT3G01500.2	AT3G01500.1;AT3G01500.3;AT3G01500.2	2;2;2	2;2;2	2;2;2	>AT3G01500.1 | Symbols: CA1, ATBCA1, SABP3, ATSABP3 | carbonic anhydrase 1 | chr3:194853-196716 REVERSE LENGTH=270;>AT3G01500.3 | Symbols: CA1 | carbonic anhydrase 1 | chr3:195173-197873 REVERSE LENGTH=336;>AT3G01500.2 | Symbols: CA1 | carbonic anhydrase 1	3	2	2	2	1	1	1	1	1	1	2	2	1	1	1	1	1	1	2	2	1	1	1	1	1	1	2	2	12.6	12.6	12.6	29.504	270	270;336;347	1	10	0	15.38	By matching	By matching	By matching	By matching	By matching	By MS/MS
AT3G01540.1;AT3G01540.4;AT3G01540.3;AT3G01540.2;AT5G14610.2;AT5G14610.1	AT3G01540.1;AT3G01540.4;AT3G01540.3;AT3G01540.2;AT5G14610.2;AT5G14610.1	6;6;6;6;3;3	5;5;5;5;2;2	5;5;5;5;2;2	>AT3G01540.1 | Symbols: DRH1, ATDRH1 | DEAD box RNA helicase 1 | chr3:213077-216142 REVERSE LENGTH=618;>AT3G01540.4 | Symbols: DRH1, ATDRH1 | DEAD box RNA helicase 1 | chr3:213077-216142 REVERSE LENGTH=619;>AT3G01540.3 | Symbols: DRH1, ATDRH1 | DEAD box RN	6	6	5	5	1	5	6	5	4	5	5	5	1	4	5	4	3	4	4	5	1	4	5	4	3	4	4	5	13.4	11.7	11.7	67.64	618	618;619;619;619;645;712	1	30	0	43.371	By matching	By MS/MS	By MS/MS	By MS/MS	By MS/MS	By MS/MS
AT3G02110.1	AT3G02110.1	7	7	7	>AT3G02110.1 | Symbols: scpl25 | serine carboxypeptidase-like 25 | chr3:370902-373637 REVERSE LENGTH=473	1	7	7	7	1	4	5	6	1	3	5	5	1	4	5	6	1	3	5	5	1	4	5	6	1	3	5	5	17.8	17.8	17.8	53.4	473	473	1	36	0	81.98	By matching	By MS/MS	By MS/MS	By MS/MS	By MS/MS	By MS/MS
AT3G02760.1	AT3G02760.1	2	2	2	>AT3G02760.1 | Symbols: | Class II aaRS and biotin synthetases superfamily protein | chr3:597588-600650 REVERSE LENGTH=883	1	2	2	2	0	2	1	1	0	2	2	2	0	2	1	1	0	2	2	2	0	2	1	1	0	2	2	2	2.7	2.7	2.7	97.536	883	883	1	10	0	10.99	By matching	By matching	By matching	By matching	By matching	By MS/MS
AT5G17920.2;AT5G17920.1;AT3G03780.3;AT3G03780.2;AT3G03780.1;AT5G20980.2;AT5G20980.1	AT5G17920.2;AT5G17920.1;AT3G03780.3;AT3G03780.2;AT3G03780.1	3;3;3;3;3;1;1	3;3;3;3;3;1;1	3;3;3;3;3;1;1	>AT5G17920.2 | Symbols: ATCIMS | Cobalamin-independent synthase family protein | chr5:5935771-5939195 FORWARD LENGTH=765;>AT5G17920.1 | Symbols: ATCIMS, ATMETS, ATMS1 | Cobalamin-independent synthase family protein | chr5:5935771-5939195 FORWARD LENGTH=765	7	3	3	3	0	2	2	2	1	3	3	3	0	2	2	2	1	3	3	3	0	2	2	2	1	3	3	3	5.1	5.1	5.1	84.356	765	765;765;765;765;765;812;812	1	16	0	18.545	By matching	By matching	By matching	By matching	By matching	By MS/MS
AT3G04600.3;AT3G04600.2;AT3G04600.1	AT3G04600.3;AT3G04600.2;AT3G04600.1	3;3;3	3;3;3	3;3;3	>AT3G04600.3 | Symbols: | Nucleotidylyl transferase superfamily protein | chr3:1243152-1245958 FORWARD LENGTH=402;>AT3G04600.2 | Symbols: | Nucleotidylyl transferase superfamily protein | chr3:1243152-1245958 FORWARD LENGTH=402;>AT3G04600.1 | Symbols: |	3	3	3	3	0	1	0	1	1	3	2	3	0	1	0	1	1	3	2	3	0	1	0	1	1	3	2	3	10.2	10.2	10.2	45.754	402	402;402;402	1	11	0	24.929	By matching	By matching	By matching	By MS/MS	By MS/MS	By MS/MS
AT3G05060.1	AT3G05060.1	4	4	3	>AT3G05060.1 | Symbols: | NOP56-like pre RNA processing ribonucleoprotein | chr3:1413174-1415564 REVERSE LENGTH=533	1	4	4	3	1	4	4	3	3	4	4	4	1	4	4	3	3	4	4	4	1	3	3	2	2	3	3	3	9.9	9.9	7.5	59.002	533	533	1	27	0	27.085	By matching	By matching	By MS/MS	By MS/MS	By matching	By MS/MS
AT3G05910.2;AT3G05910.1;AT5G26670.2;AT5G26670.1	AT3G05910.2;AT3G05910.1	3;3;1;1	3;3;1;1	3;3;1;1	>AT3G05910.2 | Symbols: | Pectinacetylesterase family protein | chr3:1764389-1767240 REVERSE LENGTH=311;>AT3G05910.1 | Symbols: | Pectinacetylesterase family protein | chr3:1764509-1767240 REVERSE LENGTH=415	4	3	3	3	0	3	3	3	1	2	3	2	0	3	3	3	1	2	3	2	0	3	3	3	1	2	3	2	11.6	11.6	11.6	34.391	311	311;415;298;416	1	17	0	17.541	By matching	By MS/MS	By MS/MS	By MS/MS	By matching	By matching
AT3G07170.1	AT3G07170.1	2	2	2	>AT3G07170.1 | Symbols: | Sterile alpha motif (SAM) domain-containing protein | chr3:2280428-2282097 FORWARD LENGTH=203	1	2	2	2	0	1	2	2	1	1	2	2	0	1	2	2	1	1	2	2	0	1	2	2	1	1	2	2	8.9	8.9	8.9	22.682	203	203	1	11	0	11.059	By matching	By matching	By matching	By MS/MS	By matching	By matching
AT3G08580.2;AT3G08580.1;AT5G13490.2;AT5G13490.1;AT4G28390.1	AT3G08580.2;AT3G08580.1	6;6;2;2;1	6;6;2;2;1	6;6;2;2;1	>AT3G08580.2 | Symbols: AAC1 | ADP/ATP carrier 1 | chr3:2605706-2607030 REVERSE LENGTH=381;>AT3G08580.1 | Symbols: AAC1 | ADP/ATP carrier 1 | chr3:2605706-2607030 REVERSE LENGTH=381	5	6	6	6	1	5	6	5	4	6	6	6	1	5	6	5	4	6	6	6	1	5	6	5	4	6	6	6	16.8	16.8	16.8	41.475	381	381;381;385;385;379	1	45	0	41.7	By MS/MS	By MS/MS	By MS/MS	By MS/MS	By matching	By MS/MS
AT3G08940.2;AT3G08940.1	AT3G08940.2	3;1	3;1	3;1	>AT3G08940.2 | Symbols: LHCB4.2 | light harvesting complex photosystem II | chr3:2717717-2718665 FORWARD LENGTH=287	2	3	3	3	0	1	2	2	2	2	2	2	0	1	2	2	2	2	2	2	0	1	2	2	2	2	2	2	13.2	13.2	13.2	31.193	287	287;227	1	13	0	29.685	By matching	By MS/MS	By matching	By MS/MS	By MS/MS	By MS/MS
AT3G09260.1;AT1G66270.2;AT1G66270.1;AT1G66280.1	AT3G09260.1	7;3;3;2	7;3;3;2	7;3;3;2	>AT3G09260.1 | Symbols: PYK10, PSR3.1, BGLU23, LEB | Glycosyl hydrolase superfamily protein | chr3:2840657-2843730 REVERSE LENGTH=524	4	7	7	7	0	5	6	5	6	7	6	7	0	5	6	5	6	7	6	7	0	5	6	5	6	7	6	7	19.1	19.1	19.1	59.72	524	524;522;524;524	1	48	0	163.17	By matching	By MS/MS	By MS/MS	By matching	By MS/MS	By MS/MS
AT3G11710.1	AT3G11710.1	9	9	9	>AT3G11710.1 | Symbols: ATKRS-1 | lysyl-tRNA synthetase 1 | chr3:3702359-3705613 REVERSE LENGTH=626	1	9	9	9	1	1	2	2	2	5	8	7	1	1	2	2	2	5	8	7	1	1	2	2	2	5	8	7	18.1	18.1	18.1	70.887	626	626	1	28	0	69.173	By matching	By matching	By matching	By matching	By matching	By MS/MS
AT3G11940.2;AT3G11940.1;AT2G37270.2;AT2G37270.1	AT3G11940.2;AT3G11940.1;AT2G37270.2;AT2G37270.1	2;2;1;1	2;2;1;1	2;2;1;1	>AT3G11940.2 | Symbols: ATRPS5A, AML1, RPS5A | ribosomal protein 5A | chr3:3778175-3779354 REVERSE LENGTH=207;>AT3G11940.1 | Symbols: ATRPS5A, AML1, RPS5A | ribosomal protein 5A | chr3:3778175-3779354 REVERSE LENGTH=207;>AT2G37270.2 | Symbols: ATRPS5B, RPS	4	2	2	2	2	2	2	2	1	0	0	0	2	2	2	2	1	0	0	0	2	2	2	2	1	0	0	0	16.4	16.4	16.4	22.921	207	207;207;207;207	1	9	0	28.151	By MS/MS	By matching	By MS/MS	By MS/MS	By matching	By matching
AT3G12140.2;AT3G12140.1;AT3G12140.3	AT3G12140.2;AT3G12140.1;AT3G12140.3	3;3;3	3;3;3	3;3;3	>AT3G12140.2 | Symbols: | Emsy N Terminus (ENT)/ plant Tudor-like domains-containing protein | chr3:3868947-3870964 REVERSE LENGTH=327;>AT3G12140.1 | Symbols: | Emsy N Terminus (ENT)/ plant Tudor-like domains-containing protein | chr3:3868947-3870964 REV	3	3	3	3	0	1	1	1	2	2	3	3	0	1	1	1	2	2	3	3	0	1	1	1	2	2	3	3	15.3	15.3	15.3	36.911	327	327;327;383	1	13	0	25.539	By matching	By matching	By matching	By matching	By matching	By MS/MS
AT3G12290.1	AT3G12290.1	3	3	3	>AT3G12290.1 | Symbols: | Amino acid dehydrogenase family protein | chr3:3919591-3921326 FORWARD LENGTH=299	1	3	3	3	0	2	2	2	1	2	3	2	0	2	2	2	1	2	3	2	0	2	2	2	1	2	3	2	14	14	14	31.589	299	299	1	14	0	22.018	By matching	By matching	By matching	By matching	By MS/MS	By MS/MS
AT3G12345.1	AT3G12345.1	2	2	2	>AT3G12345.1 | Symbols: | unknown protein; LOCATED IN: chloroplast; Has 35333 Blast hits to 34131 proteins in 2444 species: Archae - 798; Bacteria - 22429; Metazoa - 974; Fungi - 991; Plants - 531; Viruses - 0; Other Eukaryotes - 9610 (source: NCBI BLink)	1	2	2	2	1	2	2	2	1	1	2	2	1	2	2	2	1	1	2	2	1	2	2	2	1	1	2	2	16.1	16.1	16.1	20.149	186	186	1	13	0	28.853	By matching	By MS/MS	By MS/MS	By MS/MS	By matching	By matching
AT3G12700.1;AT3G12700.2	AT3G12700.1;AT3G12700.2	4;2	4;2	4;2	>AT3G12700.1 | Symbols: | Eukaryotic aspartyl protease family protein | chr3:4037136-4039043 FORWARD LENGTH=461;>AT3G12700.2 | Symbols: | Eukaryotic aspartyl protease family protein | chr3:4037136-4038387 FORWARD LENGTH=263	2	4	4	4	0	0	3	1	1	4	4	3	0	0	3	1	1	4	4	3	0	0	3	1	1	4	4	3	12.8	12.8	12.8	50.567	461	461;263	1	16	0	37.555	By matching	By matching	By MS/MS	By MS/MS	By matching	By MS/MS
AT3G12780.1	AT3G12780.1	4	4	4	>AT3G12780.1 | Symbols: PGK1 | phosphoglycerate kinase 1 | chr3:4061127-4063140 REVERSE LENGTH=481	1	4	4	4	0	2	3	3	1	3	3	4	0	2	3	3	1	3	3	4	0	2	3	3	1	3	3	4	11.4	11.4	11.4	50.111	481	481	1	19	0	23.13	By matching	By matching	By matching	By matching	By MS/MS	By MS/MS
AT3G12800.1;AT2G07640.1	AT3G12800.1	9;2	9;2	9;2	>AT3G12800.1 | Symbols: SDRB, DECR | short-chain dehydrogenase-reductase B | chr3:4063463-4064757 REVERSE LENGTH=298	2	9	9	9	4	5	6	5	5	7	8	9	4	5	6	5	5	7	8	9	4	5	6	5	5	7	8	9	30.2	30.2	30.2	31.796	298	298;156	1	56	0	80.332	By matching	By MS/MS	By MS/MS	By MS/MS	By MS/MS	By MS/MS
AT3G13224.2;AT3G13224.1	AT3G13224.2;AT3G13224.1	10;8	10;8	10;8	>AT3G13224.2 | Symbols: | RNA-binding (RRM/RBD/RNP motifs) family protein | chr3:4254848-4256621 FORWARD LENGTH=358;>AT3G13224.1 | Symbols: | RNA-binding (RRM/RBD/RNP motifs) family protein | chr3:4254848-4256014 FORWARD LENGTH=231	2	10	10	10	0	3	3	2	6	6	9	10	0	3	3	2	6	6	9	10	0	3	3	2	6	6	9	10	39.7	39.7	39.7	37.864	358	358;231	1	44	0	164.6	By matching	By matching	By matching	By MS/MS	By MS/MS	By MS/MS
AT3G13750.1	AT3G13750.1	10	10	10	>AT3G13750.1 | Symbols: BGAL1 | beta galactosidase 1 | chr3:4511192-4515756 FORWARD LENGTH=847	1	10	10	10	0	6	8	6	9	10	10	10	0	6	8	6	9	10	10	10	0	6	8	6	9	10	10	10	17.6	17.6	17.6	93.658	847	847	1	72	0	77.902	By matching	By MS/MS	By MS/MS	By MS/MS	By MS/MS	By MS/MS
AT3G13790.2;AT3G13790.1;AT1G55120.2;AT1G55120.3;AT1G55120.1	AT3G13790.2;AT3G13790.1	13;13;1;1;1	13;13;1;1;1	13;13;1;1;1	>AT3G13790.2 | Symbols: ATBFRUCT1 | Glycosyl hydrolases family 32 protein | chr3:4533084-4535831 REVERSE LENGTH=581;>AT3G13790.1 | Symbols: ATCWINV1, ATBFRUCT1 | Glycosyl hydrolases family 32 protein | chr3:4533084-4535831 REVERSE LENGTH=584	5	13	13	13	4	11	11	8	10	13	12	11	4	11	11	8	10	13	12	11	4	11	11	8	10	13	12	11	31.8	31.8	31.8	65.953	581	581;584;555;579;594	1	95	0	163.03	By matching	By MS/MS	By MS/MS	By MS/MS	By MS/MS	By MS/MS
AT3G14110.2;AT3G14110.1;AT3G14110.3	AT3G14110.2;AT3G14110.1;AT3G14110.3	6;6;6	6;6;6	6;6;6	>AT3G14110.2 | Symbols: FLU | Tetratricopeptide repeat (TPR)-like superfamily protein | chr3:4676222-4677010 REVERSE LENGTH=232;>AT3G14110.1 | Symbols: FLU | Tetratricopeptide repeat (TPR)-like superfamily protein | chr3:4676222-4677602 REVERSE LENGTH=316;	3	6	6	6	3	4	5	6	3	6	6	6	3	4	5	6	3	6	6	6	3	4	5	6	3	6	6	6	25.9	25.9	25.9	25.718	232	232;316;317	1	40	0	50.973	By matching	By MS/MS	By MS/MS	By MS/MS	By MS/MS	By MS/MS
AT3G14310.1;AT1G53830.1;AT3G10720.1;AT4G02320.1;AT3G60730.1;AT4G33220.1;AT2G26440.1;AT1G23200.1;AT1G02810.1;AT3G49220.1;AT3G10720.2;AT4G15980.1	AT3G14310.1	15;4;1;1;1;1;1;1;1;1;1;1	15;4;1;1;1;1;1;1;1;1;1;1	14;3;0;0;0;0;0;0;0;0;0;0	>AT3G14310.1 | Symbols: ATPME3, PME3 | pectin methylesterase 3 | chr3:4772214-4775095 REVERSE LENGTH=592	12	15	15	14	6	14	14	14	12	15	15	15	6	14	14	14	12	15	15	15	6	14	13	13	12	14	14	14	28.7	28.7	27.5	64.255	592	592;587;263;518;519;525;547;554;579;598;619;701	1	167	0	323.31	By matching	By MS/MS	By MS/MS	By MS/MS	By MS/MS	By MS/MS
AT3G15190.1	AT3G15190.1	2	2	2	>AT3G15190.1 | Symbols: | chloroplast 30S ribosomal protein S20, putative | chr3:5116216-5117412 FORWARD LENGTH=202	1	2	2	2	0	0	2	1	0	0	2	2	0	0	2	1	0	0	2	2	0	0	2	1	0	0	2	2	11.9	11.9	11.9	21.826	202	202	1	7	0	12.383	By matching	By matching	By MS/MS	By matching	By matching	By matching
AT3G15356.1;AT1G53080.1	AT3G15356.1	5;1	5;1	4;1	>AT3G15356.1 | Symbols: | Legume lectin family protein | chr3:5174603-5175418 REVERSE LENGTH=271	2	5	5	4	0	4	4	3	3	5	5	4	0	4	4	3	3	5	5	4	0	4	4	3	3	4	4	4	22.1	22.1	18.8	29.749	271	271;283	1	28	0	39.245	By matching	By MS/MS	By MS/MS	By MS/MS	By MS/MS	By MS/MS
AT3G15730.1;AT1G52570.1	AT3G15730.1;AT1G52570.1	2;1	2;1	2;1	>AT3G15730.1 | Symbols: PLDALPHA1, PLD | phospholipase D alpha 1 | chr3:5330835-5333474 FORWARD LENGTH=810;>AT1G52570.1 | Symbols: PLDALPHA2 | phospholipase D alpha 2 | chr1:19583940-19586551 REVERSE LENGTH=810	2	2	2	2	0	1	1	0	2	2	2	2	0	1	1	0	2	2	2	2	0	1	1	0	2	2	2	2	3.3	3.3	3.3	91.847	810	810;810	1	10	0	12.984	By matching	By matching	By matching	By matching	By MS/MS	By MS/MS
AT3G16000.1	AT3G16000.1	7	7	7	>AT3G16000.1 | Symbols: MFP1 | MAR binding filament-like protein 1 | chr3:5431041-5433613 REVERSE LENGTH=726	1	7	7	7	0	2	3	1	3	6	5	7	0	2	3	1	3	6	5	7	0	2	3	1	3	6	5	7	12	12	12	81.972	726	726	1	27	0	43.897	By matching	By matching	By matching	By matching	By MS/MS	By MS/MS
AT3G18035.1	AT3G18035.1	8	8	8	>AT3G18035.1 | Symbols: HON4 | winged-helix DNA-binding transcription factor family protein | chr3:6169384-6171558 REVERSE LENGTH=480	1	8	8	8	5	5	7	8	3	7	6	8	5	5	7	8	3	7	6	8	5	5	7	8	3	7	6	8	26.2	26.2	26.2	51.524	480	480	1	77	0	159.43	By MS/MS	By MS/MS	By MS/MS	By MS/MS	By MS/MS	By MS/MS
AT3G18080.1;AT3G18070.2;AT3G18070.1	AT3G18080.1	16;3;3	16;3;3	16;3;3	>AT3G18080.1 | Symbols: BGLU44 | B-S glucosidase 44 | chr3:6191586-6194124 FORWARD LENGTH=512	3	16	16	16	3	11	15	14	8	13	15	15	3	11	15	14	8	13	15	15	3	11	15	14	8	13	15	15	37.9	37.9	37.9	58.983	512	512;424;501	1	114	0	262.47	By MS/MS	By MS/MS	By MS/MS	By MS/MS	By MS/MS	By MS/MS
AT3G18790.1	AT3G18790.1	3	3	3	>AT3G18790.1 | Symbols: | FUNCTIONS IN: molecular_function unknown; INVOLVED IN: biological_process unknown; LOCATED IN: chloroplast; EXPRESSED IN: 22 plant structures; EXPRESSED DURING: 13 growth stages; CONTAINS InterPro DOMAIN/s: Isy1-like splicing (In	1	3	3	3	0	1	2	2	2	3	2	3	0	1	2	2	2	3	2	3	0	1	2	2	2	3	2	3	16	16	16	35.377	300	300	1	15	0	28.609	By matching	By matching	By MS/MS	By MS/MS	By MS/MS	By MS/MS
AT3G18890.1	AT3G18890.1	4	4	4	>AT3G18890.1 | Symbols: | NAD(P)-binding Rossmann-fold superfamily protein | chr3:6511169-6514729 FORWARD LENGTH=641	1	4	4	4	0	1	2	4	2	4	4	4	0	1	2	4	2	4	4	4	0	1	2	4	2	4	4	4	11.9	11.9	11.9	68.341	641	641	1	21	0	60.496	By matching	By matching	By matching	By matching	By MS/MS	By MS/MS
AT3G18990.1;AT1G49480.1	AT3G18990.1	4;1	4;1	4;1	>AT3G18990.1 | Symbols: VRN1, REM39 | AP2/B3-like transcriptional factor family protein | chr3:6549077-6551568 REVERSE LENGTH=341	2	4	4	4	0	2	2	2	2	3	4	3	0	2	2	2	2	3	4	3	0	2	2	2	2	3	4	3	11.4	11.4	11.4	39.274	341	341;226	1	18	0	23.177	By matching	By matching	By matching	By MS/MS	By matching	By MS/MS
AT3G19760.1;AT1G51380.1	AT3G19760.1	9;1	9;1	9;1	>AT3G19760.1 | Symbols: EIF4A-III | eukaryotic initiation factor 4A-III | chr3:6863790-6866242 FORWARD LENGTH=408	2	9	9	9	0	4	7	7	7	9	9	9	0	4	7	7	7	9	9	9	0	4	7	7	7	9	9	9	25.2	25.2	25.2	45.844	408	408;392	1	57	0	74.069	By matching	By MS/MS	By MS/MS	By MS/MS	By MS/MS	By MS/MS
AT3G19820.3;AT3G19820.2;AT3G19820.1	AT3G19820.3;AT3G19820.2;AT3G19820.1	7;7;7	7;7;7	7;7;7	>AT3G19820.3 | Symbols: DWF1 | cell elongation protein / DWARF1 / DIMINUTO (DIM) | chr3:6879835-6881616 REVERSE LENGTH=561;>AT3G19820.2 | Symbols: DWF1, DIM, EVE1, DIM1, CBB1 | cell elongation protein / DWARF1 / DIMINUTO (DIM) | chr3:6879835-6881616 REVERS	3	7	7	7	0	6	7	7	5	6	7	7	0	6	7	7	5	6	7	7	0	6	7	7	5	6	7	7	13.9	13.9	13.9	65.393	561	561;561;561	1	45	0	41.108	By matching	By MS/MS	By MS/MS	By MS/MS	By MS/MS	By MS/MS
AT3G20820.1	AT3G20820.1	9	9	9	>AT3G20820.1 | Symbols: | Leucine-rich repeat (LRR) family protein | chr3:7280930-7282027 FORWARD LENGTH=365	1	9	9	9	7	9	8	9	8	9	9	9	7	9	8	9	8	9	9	9	7	9	8	9	8	9	9	9	33.2	33.2	33.2	39.862	365	365	1	77	0	323.31	By MS/MS	By MS/MS	By MS/MS	By MS/MS	By MS/MS	By MS/MS
AT3G22120.1;AT4G15160.2;AT4G15160.1	AT3G22120.1;AT4G15160.2;AT4G15160.1	2;1;1	2;1;1	2;1;1	>AT3G22120.1 | Symbols: CWLP | cell wall-plasma membrane linker protein | chr3:7795283-7796287 REVERSE LENGTH=334;>AT4G15160.2 | Symbols: | Bifunctional inhibitor/lipid-transfer protein/seed storage 2S albumin superfamily protein | chr4:8646192-8647019 FO	3	2	2	2	0	2	2	0	1	1	2	2	0	2	2	0	1	1	2	2	0	2	2	0	1	1	2	2	11.4	11.4	11.4	34.669	334	334;193;275	1	10	0	24.252	By matching	By matching	By MS/MS	By matching	By matching	By matching
AT3G22520.1	AT3G22520.1	2	2	2	>AT3G22520.1 | Symbols: | unknown protein; INVOLVED IN: biological_process unknown; LOCATED IN: chloroplast stroma, chloroplast, chloroplast envelope; EXPRESSED IN: 24 plant structures; EXPRESSED DURING: 13 growth stages; BEST Arabidopsis thaliana protein	1	2	2	2	0	0	2	2	1	2	2	2	0	0	2	2	1	2	2	2	0	0	2	2	1	2	2	2	3.8	3.8	3.8	67.57	600	600	1	12	0	12.495	By matching	By matching	By MS/MS	By MS/MS	By matching	By MS/MS
AT3G26060.1;AT3G26060.2	AT3G26060.1;AT3G26060.2	11;11	11;11	11;11	>AT3G26060.1 | Symbols: ATPRX Q | Thioredoxin superfamily protein | chr3:9524807-9526123 FORWARD LENGTH=216;>AT3G26060.2 | Symbols: ATPRX Q | Thioredoxin superfamily protein | chr3:9524807-9526123 FORWARD LENGTH=217	2	11	11	11	7	9	11	10	9	11	11	11	7	9	11	10	9	11	11	11	7	9	11	10	9	11	11	11	47.2	47.2	47.2	23.678	216	216;217	1	96	0	307.47	By MS/MS	By MS/MS	By MS/MS	By MS/MS	By MS/MS	By MS/MS
AT3G26420.1	AT3G26420.1	4	4	4	>AT3G26420.1 | Symbols: ATRZ-1A | RNA-binding (RRM/RBD/RNP motifs) family protein with retrovirus zinc finger-like domain | chr3:9671953-9673055 FORWARD LENGTH=245	1	4	4	4	2	1	2	1	4	4	4	4	2	1	2	1	4	4	4	4	2	1	2	1	4	4	4	4	13.1	13.1	13.1	26.923	245	245	1	34	0	32.608	By matching	By matching	By MS/MS	By MS/MS	By MS/MS	By MS/MS
AT3G26560.1	AT3G26560.1	4	4	4	>AT3G26560.1 | Symbols: | ATP-dependent RNA helicase, putative | chr3:9750122-9753719 REVERSE LENGTH=1168	1	4	4	4	0	1	3	3	1	2	4	2	0	1	3	3	1	2	4	2	0	1	3	3	1	2	4	2	4.5	4.5	4.5	134.16	1168	1168	1	16	0	25.224	By matching	By matching	By MS/MS	By MS/MS	By matching	By MS/MS
AT3G26650.1	AT3G26650.1	16	16	5	>AT3G26650.1 | Symbols: GAPA, GAPA-1 | glyceraldehyde 3-phosphate dehydrogenase A subunit | chr3:9795226-9796848 FORWARD LENGTH=396	1	16	16	5	7	12	13	15	14	14	15	15	7	12	13	15	14	14	15	15	2	4	4	5	4	4	4	4	46.2	46.2	14.6	42.489	396	396	1	120	0	323.31	By MS/MS	By MS/MS	By MS/MS	By MS/MS	By MS/MS	By MS/MS
AT3G27925.1	AT3G27925.1	13	13	13	>AT3G27925.1 | Symbols: DEGP1, Deg1 | DegP protease 1 | chr3:10366659-10368864 REVERSE LENGTH=439	1	13	13	13	6	8	11	9	11	12	13	13	6	8	11	9	11	12	13	13	6	8	11	9	11	12	13	13	39	39	39	46.673	439	439	1	118	0	298.61	By MS/MS	By MS/MS	By MS/MS	By MS/MS	By MS/MS	By MS/MS
AT3G28730.1	AT3G28730.1	4	4	4	>AT3G28730.1 | Symbols: ATHMG, SSRP1, NFD, HMG | high mobility group | chr3:10784954-10788498 FORWARD LENGTH=646	1	4	4	4	0	1	1	1	2	3	4	3	0	1	1	1	2	3	4	3	0	1	1	1	2	3	4	3	7.4	7.4	7.4	71.645	646	646	1	15	0	23.231	By matching	By matching	By matching	By matching	By MS/MS	By MS/MS
AT3G44110.1;AT3G44110.2	AT3G44110.1;AT3G44110.2	13;12	13;12	4;3	>AT3G44110.1 | Symbols: ATJ3, ATJ | DNAJ homologue 3 | chr3:15869115-15871059 REVERSE LENGTH=420;>AT3G44110.2 | Symbols: ATJ3, ATJ | DNAJ homologue 3 | chr3:15869179-15871059 REVERSE LENGTH=343	2	13	13	4	0	5	12	10	7	9	12	12	0	5	12	10	7	9	12	12	0	1	4	3	1	2	4	4	32.1	32.1	12.4	46.444	420	420;343	1	85	0	188.69	By matching	By MS/MS	By MS/MS	By MS/MS	By MS/MS	By MS/MS
AT3G44600.1	AT3G44600.1	3	3	3	>AT3G44600.1 | Symbols: CYP71 | cyclophilin71 | chr3:16165368-16169201 REVERSE LENGTH=631	1	3	3	3	0	0	0	1	0	3	3	3	0	0	0	1	0	3	3	3	0	0	0	1	0	3	3	3	5.5	5.5	5.5	70.983	631	631	1	10	0	17.235	By matching	By matching	By matching	By matching	By matching	By MS/MS
AT3G44890.1	AT3G44890.1	2	2	2	>AT3G44890.1 | Symbols: RPL9 | ribosomal protein L9 | chr3:16386505-16387963 FORWARD LENGTH=197	1	2	2	2	1	1	1	2	1	2	2	2	1	1	1	2	1	2	2	2	1	1	1	2	1	2	2	2	13.2	13.2	13.2	22.134	197	197	1	12	0	15.805	By matching	By matching	By matching	By MS/MS	By matching	By MS/MS
AT5G62300.2;AT5G62300.1;AT3G45030.1;AT3G47370.3;AT3G47370.2;AT3G47370.1	AT5G62300.2;AT5G62300.1;AT3G45030.1	3;3;3;1;1;1	3;3;3;1;1;1	3;3;3;1;1;1	>AT5G62300.2 | Symbols: | Ribosomal protein S10p/S20e family protein | chr5:25021388-25022235 REVERSE LENGTH=124;>AT5G62300.1 | Symbols: | Ribosomal protein S10p/S20e family protein | chr5:25021388-25022235 REVERSE LENGTH=124;>AT3G45030.1 | Symbols: | R	6	3	3	3	0	2	3	3	1	2	3	2	0	2	3	3	1	2	3	2	0	2	3	3	1	2	3	2	28.2	28.2	28.2	13.878	124	124;124;124;122;122;122	1	16	0	21.189	By matching	By MS/MS	By MS/MS	By MS/MS	By MS/MS	By MS/MS
AT3G45780.2;AT3G45780.1	AT3G45780.2;AT3G45780.1	2;2	2;2	2;2	>AT3G45780.2 | Symbols: PHOT1, NPH1, JK224, RPT1 | phototropin 1 | chr3:16818557-16823960 FORWARD LENGTH=996;>AT3G45780.1 | Symbols: PHOT1, NPH1, JK224, RPT1 | phototropin 1 | chr3:16818557-16823960 FORWARD LENGTH=996	2	2	2	2	0	1	1	1	1	2	2	2	0	1	1	1	1	2	2	2	0	1	1	1	1	2	2	2	2.7	2.7	2.7	111.69	996	996;996	1	10	0	12.206	By matching	By matching	By matching	By matching	By matching	By MS/MS
AT5G03406.1;AT3G46100.1	AT5G03406.1;AT3G46100.1	2;2	2;2	2;2	>AT5G03406.1 | Symbols: | Class II aaRS and biotin synthetases superfamily protein | chr5:839966-841444 FORWARD LENGTH=263;>AT3G46100.1 | Symbols: ATHRS1, HRS1 | Histidyl-tRNA synthetase 1 | chr3:16928444-16930984 REVERSE LENGTH=486	2	2	2	2	0	2	2	1	0	2	2	2	0	2	2	1	0	2	2	2	0	2	2	1	0	2	2	2	9.1	9.1	9.1	30.31	263	263;486	1	11	0	14.685	By matching	By matching	By matching	By matching	By matching	By MS/MS
AT3G46740.1	AT3G46740.1	3	3	3	>AT3G46740.1 | Symbols: TOC75-III, MAR1 | translocon at the outer envelope membrane of chloroplasts 75-III | chr3:17216104-17219296 REVERSE LENGTH=818	1	3	3	3	0	2	2	2	3	3	3	3	0	2	2	2	3	3	3	3	0	2	2	2	3	3	3	3	6.5	6.5	6.5	89.188	818	818	1	18	0	32.742	By matching	By matching	By matching	By matching	By MS/MS	By MS/MS
AT3G46780.1	AT3G46780.1	23	23	23	>AT3G46780.1 | Symbols: PTAC16 | plastid transcriptionally active 16 | chr3:17228766-17231021 FORWARD LENGTH=510	1	23	23	23	11	17	20	23	16	17	20	20	11	17	20	23	16	17	20	20	11	17	20	23	16	17	20	20	50.2	50.2	50.2	54.358	510	510	1	172	0	323.31	By MS/MS	By MS/MS	By MS/MS	By MS/MS	By MS/MS	By MS/MS
AT3G47800.1	AT3G47800.1	7	7	7	>AT3G47800.1 | Symbols: | Galactose mutarotase-like superfamily protein | chr3:17634971-17636998 FORWARD LENGTH=358	1	7	7	7	0	4	5	4	6	6	7	7	0	4	5	4	6	6	7	7	0	4	5	4	6	6	7	7	28.5	28.5	28.5	39.714	358	358	1	39	0	88.765	By matching	By matching	By MS/MS	By MS/MS	By MS/MS	By MS/MS
AT3G49120.1	AT3G49120.1	2	2	2	>AT3G49120.1 | Symbols: ATPERX34, PERX34, PRXCB, ATPCB, PRX34 | peroxidase CB | chr3:18207819-18210041 FORWARD LENGTH=353	1	2	2	2	0	1	2	2	1	2	2	1	0	1	2	2	1	2	2	1	0	1	2	2	1	2	2	1	8.2	8.2	8.2	38.832	353	353	1	11	0	27.065	By matching	By matching	By MS/MS	By matching	By matching	By matching
AT5G67380.2;AT3G50000.1;AT5G67380.1;AT2G23080.2;AT2G23080.1;AT2G23070.1	AT5G67380.2;AT3G50000.1;AT5G67380.1;AT2G23080.2;AT2G23080.1;AT2G23070.1	3;3;3;2;2;2	3;3;3;2;2;2	3;3;3;2;2;2	>AT5G67380.2 | Symbols: CKA1, ATCKA1 | casein kinase alpha 1 | chr5:26881156-26883383 REVERSE LENGTH=376;>AT3G50000.1 | Symbols: CKA2, ATCKA2 | casein kinase II, alpha chain 2 | chr3:18534487-18536743 FORWARD LENGTH=403;>AT5G67380.1 | Symbols: CKA1, ATCKA1	6	3	3	3	0	0	2	2	2	2	2	3	0	0	2	2	2	2	2	3	0	0	2	2	2	2	2	3	10.1	10.1	10.1	43.896	376	376;403;409;307;333;432	1	13	0	70.614	By matching	By matching	By MS/MS	By MS/MS	By MS/MS	By MS/MS
AT3G50670.1	AT3G50670.1	2	2	2	>AT3G50670.1 | Symbols: U1-70K, U1SNRNP | U1 small nuclear ribonucleoprotein-70K | chr3:18826476-18829492 REVERSE LENGTH=427	1	2	2	2	0	0	2	2	0	2	2	2	0	0	2	2	0	2	2	2	0	0	2	2	0	2	2	2	6.8	6.8	6.8	50.388	427	427	1	10	0	14.457	By matching	By matching	By MS/MS	By MS/MS	By matching	By matching
AT3G50820.1;AT5G66570.1	AT3G50820.1;AT5G66570.1	3;3	3;3	3;3	>AT3G50820.1 | Symbols: PSBO2, PSBO-2, OEC33 | photosystem II subunit O-2 | chr3:18891008-18892311 REVERSE LENGTH=331;>AT5G66570.1 | Symbols: PSBO-1, OEE1, OEE33, OE33, PSBO1, MSP-1 | PS II oxygen-evolving complex 1 | chr5:26568744-26570124 FORWARD LENGTH=	2	3	3	3	0	1	3	2	2	3	3	2	0	1	3	2	2	3	3	2	0	1	3	2	2	3	3	2	13.6	13.6	13.6	35.019	331	331;332	1	16	0	35.093	By matching	By matching	By MS/MS	By matching	By MS/MS	By MS/MS
AT3G51140.1	AT3G51140.1	4	4	4	>AT3G51140.1 | Symbols: | Protein of unknown function (DUF3353) | chr3:18998182-18999437 FORWARD LENGTH=278	1	4	4	4	2	2	3	3	1	2	4	3	2	2	3	3	1	2	4	3	2	2	3	3	1	2	4	3	18.3	18.3	18.3	31.535	278	278	1	24	0	26.978	By matching	By MS/MS	By MS/MS	By MS/MS	By matching	By MS/MS
AT3G52500.1	AT3G52500.1	4	4	4	>AT3G52500.1 | Symbols: | Eukaryotic aspartyl protease family protein | chr3:19465644-19467053 REVERSE LENGTH=469	1	4	4	4	1	4	4	4	3	4	4	3	1	4	4	4	3	4	4	3	1	4	4	4	3	4	4	3	11.3	11.3	11.3	51.004	469	469	1	34	0	32.07	By MS/MS	By MS/MS	By MS/MS	By MS/MS	By MS/MS	By MS/MS
AT3G52930.1	AT3G52930.1	12	12	6	>AT3G52930.1 | Symbols: | Aldolase superfamily protein | chr3:19627383-19628874 REVERSE LENGTH=358	1	12	12	6	2	5	11	5	7	12	12	11	2	5	11	5	7	12	12	11	1	3	6	2	3	6	6	6	47.5	47.5	21.8	38.539	358	358	1	75	0	191.15	By matching	By matching	By MS/MS	By MS/MS	By MS/MS	By MS/MS
AT3G53460.3;AT3G53460.2;AT3G53460.1;AT3G53460.4	AT3G53460.3;AT3G53460.2;AT3G53460.1;AT3G53460.4	4;4;4;4	4;4;4;4	3;3;3;3	>AT3G53460.3 | Symbols: CP29 | chloroplast RNA-binding protein 29 | chr3:19819738-19821423 REVERSE LENGTH=342;>AT3G53460.2 | Symbols: CP29 | chloroplast RNA-binding protein 29 | chr3:19819738-19821423 REVERSE LENGTH=342;>AT3G53460.1 | Symbols: CP29 | chlor	4	4	4	3	0	2	2	2	2	4	4	4	0	2	2	2	2	4	4	4	0	2	2	1	1	3	3	3	13.2	13.2	10.5	36.007	342	342;342;342;363	1	20	0	58.043	By matching	By matching	By matching	By matching	By MS/MS	By MS/MS
AT3G54400.1	AT3G54400.1	7	7	7	>AT3G54400.1 | Symbols: | Eukaryotic aspartyl protease family protein | chr3:20140291-20142599 REVERSE LENGTH=425	1	7	7	7	3	4	6	6	5	4	6	4	3	4	6	6	5	4	6	4	3	4	6	6	5	4	6	4	23.1	23.1	23.1	45.475	425	425	1	47	0	96.325	By matching	By MS/MS	By MS/MS	By MS/MS	By MS/MS	By MS/MS
AT3G54540.1	AT3G54540.1	5	5	5	>AT3G54540.1 | Symbols: ATGCN4, GCN4 | general control non-repressible 4 | chr3:20190393-20192564 FORWARD LENGTH=723	1	5	5	5	0	1	3	2	1	2	5	3	0	1	3	2	1	2	5	3	0	1	3	2	1	2	5	3	8	8	8	80.48	723	723	1	17	0	28.267	By matching	By matching	By matching	By MS/MS	By matching	By matching
AT3G55220.1;AT3G55200.1	AT3G55220.1;AT3G55200.1	13;13	13;13	13;13	>AT3G55220.1 | Symbols: | Cleavage and polyadenylation specificity factor (CPSF) A subunit protein | chr3:20467116-20470944 REVERSE LENGTH=1214;>AT3G55200.1 | Symbols: | Cleavage and polyadenylation specificity factor (CPSF) A subunit protein | chr3:2046	2	13	13	13	0	6	7	10	11	11	12	12	0	6	7	10	11	11	12	12	0	6	7	10	11	11	12	12	15.4	15.4	15.4	134.97	1214	1214;1214	1	79	0	179.88	By matching	By MS/MS	By MS/MS	By MS/MS	By MS/MS	By MS/MS
AT3G55430.1	AT3G55430.1	4	4	4	>AT3G55430.1 | Symbols: | O-Glycosyl hydrolases family 17 protein | chr3:20549806-20552004 REVERSE LENGTH=449	1	4	4	4	0	2	4	3	0	3	4	3	0	2	4	3	0	3	4	3	0	2	4	3	0	3	4	3	8.7	8.7	8.7	48.442	449	449	1	19	0	21.919	By matching	By matching	By MS/MS	By MS/MS	By matching	By MS/MS
AT3G56940.1;AT3G56940.2	AT3G56940.1;AT3G56940.2	12;11	12;11	12;11	>AT3G56940.1 | Symbols: CRD1, CHL27, ACSF | dicarboxylate diiron protein, putative (Crd1) | chr3:21076594-21078269 FORWARD LENGTH=409;>AT3G56940.2 | Symbols: CRD1 | dicarboxylate diiron protein, putative (Crd1) | chr3:21076825-21078269 FORWARD LENGTH=332	2	12	12	12	6	9	12	12	7	10	11	10	6	9	12	12	7	10	11	10	6	9	12	12	7	10	11	10	30.8	30.8	30.8	47.63	409	409;332	1	86	0	272.75	By MS/MS	By MS/MS	By MS/MS	By MS/MS	By MS/MS	By MS/MS
AT3G57560.1	AT3G57560.1	5	5	5	>AT3G57560.1 | Symbols: NAGK | N-acetyl-l-glutamate kinase | chr3:21311164-21312207 REVERSE LENGTH=347	1	5	5	5	3	4	4	5	4	5	5	5	3	4	4	5	4	5	5	5	3	4	4	5	4	5	5	5	22.5	22.5	22.5	36.595	347	347	1	40	0	50.783	By MS/MS	By MS/MS	By MS/MS	By MS/MS	By MS/MS	By MS/MS
AT3G58510.3;AT3G58510.2;AT3G58510.1	AT3G58510.3;AT3G58510.2;AT3G58510.1	8;8;8	3;3;3	3;3;3	>AT3G58510.3 | Symbols: | DEA(D/H)-box RNA helicase family protein | chr3:21640608-21643464 FORWARD LENGTH=612;>AT3G58510.2 | Symbols: | DEA(D/H)-box RNA helicase family protein | chr3:21640608-21643464 FORWARD LENGTH=612;>AT3G58510.1 | Symbols: | DEA(D	3	8	3	3	1	3	5	6	2	6	7	6	0	1	3	2	0	2	3	3	0	1	3	2	0	2	3	3	14.9	5.9	5.9	66.025	612	612;612;612	1	14	0	21.711	By matching	By MS/MS	By MS/MS	By MS/MS	By matching	By MS/MS
AT3G61820.1;AT1G01300.1	AT3G61820.1	6;1	6;1	6;1	>AT3G61820.1 | Symbols: | Eukaryotic aspartyl protease family protein | chr3:22880074-22881525 REVERSE LENGTH=483	2	6	6	6	2	6	5	6	1	5	5	4	2	6	5	6	1	5	5	4	2	6	5	6	1	5	5	4	14.7	14.7	14.7	51.461	483	483;485	1	34	0	48.527	By matching	By MS/MS	By MS/MS	By MS/MS	By matching	By matching
AT3G62120.2;AT3G62120.1	AT3G62120.2;AT3G62120.1	10;10	10;10	10;10	>AT3G62120.2 | Symbols: | Class II aaRS and biotin synthetases superfamily protein | chr3:23001227-23003849 REVERSE LENGTH=530;>AT3G62120.1 | Symbols: | Class II aaRS and biotin synthetases superfamily protein | chr3:23001227-23003849 REVERSE LENGTH=530	2	10	10	10	1	8	7	6	7	8	7	10	1	8	7	6	7	8	7	10	1	8	7	6	7	8	7	10	25.7	25.7	25.7	60.755	530	530;530	1	54	0	84.924	By MS/MS	By MS/MS	By MS/MS	By MS/MS	By MS/MS	By MS/MS
AT3G63140.1	AT3G63140.1	12	12	12	>AT3G63140.1 | Symbols: CSP41A | chloroplast stem-loop binding protein of 41 kDa | chr3:23327006-23328620 REVERSE LENGTH=406	1	12	12	12	1	8	11	12	9	10	12	12	1	8	11	12	9	10	12	12	1	8	11	12	9	10	12	12	36.2	36.2	36.2	43.929	406	406	1	97	0	138.82	By matching	By MS/MS	By MS/MS	By MS/MS	By MS/MS	By MS/MS
AT4G01050.1	AT4G01050.1	4	4	4	>AT4G01050.1 | Symbols: TROL | thylakoid rhodanese-like | chr4:455874-458175 FORWARD LENGTH=466	1	4	4	4	1	2	4	4	3	3	4	3	1	2	4	4	3	3	4	3	1	2	4	4	3	3	4	3	9.9	9.9	9.9	49.387	466	466	1	31	0	184.44	By matching	By MS/MS	By MS/MS	By MS/MS	By MS/MS	By MS/MS
AT4G01130.1	AT4G01130.1	2	2	2	>AT4G01130.1 | Symbols: | GDSL-like Lipase/Acylhydrolase superfamily protein | chr4:485868-488007 FORWARD LENGTH=382	1	2	2	2	0	2	2	2	1	2	2	2	0	2	2	2	1	2	2	2	0	2	2	2	1	2	2	2	6.5	6.5	6.5	42.013	382	382	1	13	0	14.857	By matching	By matching	By matching	By matching	By MS/MS	By MS/MS
AT4G01310.1	AT4G01310.1	6	6	6	>AT4G01310.1 | Symbols: | Ribosomal L5P family protein | chr4:544166-545480 REVERSE LENGTH=262	1	6	6	6	1	5	5	6	5	4	6	6	1	5	5	6	5	4	6	6	1	5	5	6	5	4	6	6	25.2	25.2	25.2	28.343	262	262	1	38	0	36.36	By matching	By MS/MS	By MS/MS	By MS/MS	By matching	By MS/MS
AT4G01900.1	AT4G01900.1	3	3	3	>AT4G01900.1 | Symbols: PII, GLB1 | GLNB1 homolog | chr4:821736-823294 FORWARD LENGTH=196	1	3	3	3	0	2	3	3	2	2	2	3	0	2	3	3	2	2	2	3	0	2	3	3	2	2	2	3	16.3	16.3	16.3	21.275	196	196	1	17	0	17.732	By matching	By matching	By MS/MS	By MS/MS	By MS/MS	By MS/MS
AT4G02840.1;AT4G02840.2;AT3G07590.2;AT3G07590.1	AT4G02840.1;AT4G02840.2	3;3;1;1	3;3;1;1	3;3;1;1	>AT4G02840.1 | Symbols: | Small nuclear ribonucleoprotein family protein | chr4:1264726-1266253 FORWARD LENGTH=116;>AT4G02840.2 | Symbols: | Small nuclear ribonucleoprotein family protein | chr4:1264726-1266253 FORWARD LENGTH=126	4	3	3	3	0	1	2	2	0	2	2	3	0	1	2	2	0	2	2	3	0	1	2	2	0	2	2	3	28.4	28.4	28.4	12.75	116	116;126;114;114	1	13	0	27.269	By matching	By matching	By MS/MS	By MS/MS	By matching	By MS/MS
AT4G03280.2;AT4G03280.1	AT4G03280.2;AT4G03280.1	3;3	3;3	3;3	>AT4G03280.2 | Symbols: PETC, PGR1 | photosynthetic electron transfer C | chr4:1440462-1441717 FORWARD LENGTH=210;>AT4G03280.1 | Symbols: PETC, PGR1 | photosynthetic electron transfer C | chr4:1440314-1441717 FORWARD LENGTH=229	2	3	3	3	1	2	3	3	3	3	3	3	1	2	3	3	3	3	3	3	1	2	3	3	3	3	3	3	21.4	21.4	21.4	22.533	210	210;229	1	21	0	31.77	By MS/MS	By matching	By MS/MS	By MS/MS	By MS/MS	By MS/MS
AT4G04640.1	AT4G04640.1	8	8	8	>AT4G04640.1 | Symbols: ATPC1 | ATPase, F1 complex, gamma subunit protein | chr4:2350761-2351882 REVERSE LENGTH=373	1	8	8	8	4	6	8	8	5	7	8	8	4	6	8	8	5	7	8	8	4	6	8	8	5	7	8	8	26	26	26	40.911	373	373	1	54	0	112.74	By matching	By MS/MS	By MS/MS	By MS/MS	By MS/MS	By MS/MS
AT4G05530.1	AT4G05530.1	5	5	5	>AT4G05530.1 | Symbols: IBR1, SDRA | indole-3-butyric acid response 1 | chr4:2816462-2818074 FORWARD LENGTH=254	1	5	5	5	1	2	3	3	3	4	5	4	1	2	3	3	3	4	5	4	1	2	3	3	3	4	5	4	29.1	29.1	29.1	26.765	254	254	1	27	0	37.696	By matching	By matching	By matching	By MS/MS	By MS/MS	By MS/MS
AT4G08350.1	AT4G08350.1	5	5	5	>AT4G08350.1 | Symbols: GTA02, GTA2 | global transcription factor group A2 | chr4:5286351-5292072 FORWARD LENGTH=1041	1	5	5	5	0	2	2	3	2	3	4	5	0	2	2	3	2	3	4	5	0	2	2	3	2	3	4	5	6	6	6	115.4	1041	1041	1	21	0	43.131	By matching	By matching	By matching	By MS/MS	By MS/MS	By MS/MS
AT4G08950.1	AT4G08950.1	4	4	4	>AT4G08950.1 | Symbols: EXO | Phosphate-responsive 1 family protein | chr4:5740378-5741322 FORWARD LENGTH=314	1	4	4	4	1	4	4	4	4	3	3	4	1	4	4	4	4	3	3	4	1	4	4	4	4	3	3	4	16.2	16.2	16.2	33.599	314	314	1	31	0	61.908	By MS/MS	By MS/MS	By MS/MS	By MS/MS	By MS/MS	By MS/MS
AT4G09010.1	AT4G09010.1	6	6	6	>AT4G09010.1 | Symbols: APX4, TL29 | ascorbate peroxidase 4 | chr4:5777502-5779338 REVERSE LENGTH=349	1	6	6	6	3	5	6	6	6	6	6	6	3	5	6	6	6	6	6	6	3	5	6	6	6	6	6	6	24.9	24.9	24.9	37.934	349	349	1	44	0	119.14	By MS/MS	By MS/MS	By MS/MS	By MS/MS	By MS/MS	By MS/MS
AT4G10340.1	AT4G10340.1	5	5	5	>AT4G10340.1 | Symbols: LHCB5 | light harvesting complex of photosystem II 5 | chr4:6408200-6409496 FORWARD LENGTH=280	1	5	5	5	1	4	3	3	3	3	4	5	1	4	3	3	3	3	4	5	1	4	3	3	3	3	4	5	23.6	23.6	23.6	30.156	280	280	1	27	0	33.407	By matching	By MS/MS	By MS/MS	By MS/MS	By MS/MS	By MS/MS
AT4G10710.1;AT4G10670.1	AT4G10710.1;AT4G10670.1	2;1	2;1	2;1	>AT4G10710.1 | Symbols: SPT16 | global transcription factor C | chr4:6602226-6605450 REVERSE LENGTH=1074;>AT4G10670.1 | Symbols: GTC2 | GTC2 | chr4:6584727-6585758 FORWARD LENGTH=343	2	2	2	2	0	1	0	1	1	2	2	2	0	1	0	1	1	2	2	2	0	1	0	1	1	2	2	2	2.6	2.6	2.6	120.58	1074	1074;343	1	9	0	11.402	By matching	By matching	By matching	By matching	By matching	By matching
AT4G10750.1	AT4G10750.1	3	3	3	>AT4G10750.1 | Symbols: | Phosphoenolpyruvate carboxylase family protein | chr4:6618724-6619800 FORWARD LENGTH=358	1	3	3	3	0	1	2	3	1	2	3	3	0	1	2	3	1	2	3	3	0	1	2	3	1	2	3	3	11.2	11.2	11.2	38.404	358	358	1	21	0	21.386	By matching	By matching	By MS/MS	By MS/MS	By MS/MS	By MS/MS
AT4G11010.1	AT4G11010.1	6	6	3	>AT4G11010.1 | Symbols: NDPK3 | nucleoside diphosphate kinase 3 | chr4:6732780-6734298 REVERSE LENGTH=238	1	6	6	3	3	3	5	4	4	6	6	6	3	3	5	4	4	6	6	6	1	2	2	2	1	3	3	3	21.4	21.4	12.2	25.734	238	238	1	63	0	48.326	By matching	By MS/MS	By MS/MS	By MS/MS	By MS/MS	By MS/MS
AT4G12800.1	AT4G12800.1	4	4	4	>AT4G12800.1 | Symbols: PSAL | photosystem I subunit l | chr4:7521469-7522493 FORWARD LENGTH=219	1	4	4	4	1	3	3	3	1	3	2	3	1	3	3	3	1	3	2	3	1	3	3	3	1	3	2	3	24.7	24.7	24.7	23.051	219	219	1	19	0	28.615	By MS/MS	By matching	By MS/MS	By MS/MS	By matching	By MS/MS
AT4G13340.1;AT3G24480.1;AT4G18670.1	AT4G13340.1	4;1;1	4;1;1	4;1;1	>AT4G13340.1 | Symbols: | Leucine-rich repeat (LRR) family protein | chr4:7758610-7760892 FORWARD LENGTH=760	3	4	4	4	1	1	2	3	3	3	2	3	1	1	2	3	3	3	2	3	1	1	2	3	3	3	2	3	6.1	6.1	6.1	82.245	760	760;494;857	1	18	0	25.158	By matching	By matching	By MS/MS	By matching	By matching	By MS/MS
AT4G15020.2;AT4G15020.1	AT4G15020.2;AT4G15020.1	2;2	2;2	2;2	>AT4G15020.2 | Symbols: | hAT transposon superfamily | chr4:8575806-8578372 FORWARD LENGTH=768;>AT4G15020.1 | Symbols: | hAT transposon superfamily | chr4:8575806-8578372 FORWARD LENGTH=768	2	2	2	2	0	0	1	2	0	2	2	2	0	0	1	2	0	2	2	2	0	0	1	2	0	2	2	2	4.7	4.7	4.7	86.643	768	768;768	1	9	0	12.329	By matching	By matching	By matching	By matching	By matching	By MS/MS
AT4G16143.2;AT4G16143.1;AT3G06720.2;AT3G06720.1;AT4G02150.1	AT4G16143.2;AT4G16143.1;AT3G06720.2;AT3G06720.1	6;6;3;3;1	6;6;3;3;1	6;6;3;3;1	>AT4G16143.2 | Symbols: IMPA-2 | importin alpha isoform 2 | chr4:9134450-9137134 REVERSE LENGTH=535;>AT4G16143.1 | Symbols: IMPA-2 | importin alpha isoform 2 | chr4:9134450-9137134 REVERSE LENGTH=535;>AT3G06720.2 | Symbols: AT-IMP, ATKAP ALPHA, AIMP ALPHA	5	6	6	6	1	2	1	1	2	5	5	6	1	2	1	1	2	5	5	6	1	2	1	1	2	5	5	6	15.3	15.3	15.3	58.906	535	535;535;532;532;531	1	23	0	36.514	By matching	By matching	By MS/MS	By matching	By MS/MS	By MS/MS
AT4G16210.1	AT4G16210.1	3	3	3	>AT4G16210.1 | Symbols: ECHIA, E-COAH-2 | enoyl-CoA hydratase/isomerase A | chr4:9176864-9177978 REVERSE LENGTH=265	1	3	3	3	0	2	2	0	2	3	2	2	0	2	2	0	2	3	2	2	0	2	2	0	2	3	2	2	15.1	15.1	15.1	28.818	265	265	1	13	0	20.77	By matching	By matching	By matching	By matching	By matching	By MS/MS
AT4G19410.1;AT4G19410.2;AT5G45280.1	AT4G19410.1;AT4G19410.2	9;9;3	9;9;3	6;6;0	>AT4G19410.1 | Symbols: | Pectinacetylesterase family protein | chr4:10582188-10584766 REVERSE LENGTH=391;>AT4G19410.2 | Symbols: | Pectinacetylesterase family protein | chr4:10581037-10584766 REVERSE LENGTH=517	3	9	9	6	0	7	8	9	1	5	7	7	0	7	8	9	1	5	7	7	0	4	5	6	0	3	4	5	28.4	28.4	18.2	42.125	391	391;517;370	1	45	0	72.14	By matching	By MS/MS	By MS/MS	By MS/MS	By matching	By MS/MS
AT4G20360.1	AT4G20360.1	10	10	10	>AT4G20360.1 | Symbols: ATRAB8D, ATRABE1B, RABE1b | RAB GTPase homolog E1B | chr4:10990036-10991466 FORWARD LENGTH=476	1	10	10	10	2	5	7	9	7	8	8	9	2	5	7	9	7	8	8	9	2	5	7	9	7	8	8	9	27.5	27.5	27.5	51.63	476	476	1	69	0	152.23	By MS/MS	By MS/MS	By MS/MS	By MS/MS	By MS/MS	By MS/MS
AT5G44500.2;AT5G44500.1;AT4G20440.4;AT4G20440.3;AT4G20440.2;AT4G20440.1	AT5G44500.2;AT5G44500.1;AT4G20440.4;AT4G20440.3;AT4G20440.2;AT4G20440.1	4;4;4;4;4;4	4;4;4;4;4;4	4;4;4;4;4;4	>AT5G44500.2 | Symbols: | Small nuclear ribonucleoprotein family protein | chr5:17927505-17928269 FORWARD LENGTH=254;>AT5G44500.1 | Symbols: | Small nuclear ribonucleoprotein family protein | chr5:17927505-17928269 FORWARD LENGTH=254;>AT4G20440.4 | Symbo	6	4	4	4	2	3	4	3	4	4	4	4	2	3	4	3	4	4	4	4	2	3	4	3	4	4	4	4	16.5	16.5	16.5	26.999	254	254;254;257;257;257;257	1	38	0	39.623	By matching	By MS/MS	By MS/MS	By MS/MS	By MS/MS	By MS/MS
AT4G21150.2;AT4G21150.3;AT4G21150.1	AT4G21150.2;AT4G21150.3;AT4G21150.1	5;5;5	5;5;5	5;5;5	>AT4G21150.2 | Symbols: HAP6 | ribophorin II (RPN2) family protein | chr4:11278649-11283599 FORWARD LENGTH=678;>AT4G21150.3 | Symbols: HAP6 | ribophorin II (RPN2) family protein | chr4:11278646-11283599 FORWARD LENGTH=691;>AT4G21150.1 | Symbols: HAP6 | rib	3	5	5	5	0	2	5	3	2	4	5	4	0	2	5	3	2	4	5	4	0	2	5	3	2	4	5	4	9.7	9.7	9.7	73.266	678	678;691;691	1	25	0	30.69	By matching	By MS/MS	By MS/MS	By MS/MS	By matching	By MS/MS
AT4G21280.1;AT4G21280.2;AT4G05180.1	AT4G21280.1;AT4G21280.2	7;6;1	7;6;1	7;6;1	>AT4G21280.1 | Symbols: PSBQ, PSBQA, PSBQ-1 | photosystem II subunit QA | chr4:11334446-11335587 FORWARD LENGTH=223;>AT4G21280.2 | Symbols: PSBQ, PSBQA, PSBQ-1 | photosystem II subunit QA | chr4:11334446-11335587 FORWARD LENGTH=224	3	7	7	7	5	4	5	6	5	6	7	7	5	4	5	6	5	6	7	7	5	4	5	6	5	6	7	7	40.8	40.8	40.8	23.795	223	223;224;230	1	60	0	128.38	By matching	By MS/MS	By MS/MS	By MS/MS	By MS/MS	By MS/MS
AT4G21650.1;AT4G10550.2;AT4G21640.1;AT4G10540.1;AT4G10550.1;AT4G10550.3	AT4G21650.1	5;1;1;1;1;1	5;1;1;1;1;1	5;1;1;1;1;1	>AT4G21650.1 | Symbols: | Subtilase family protein | chr4:11501314-11504656 REVERSE LENGTH=766	6	5	5	5	3	4	4	5	3	4	5	5	3	4	4	5	3	4	5	5	3	4	4	5	3	4	5	5	9.7	9.7	9.7	81.479	766	766;722;733;775;778;794	1	33	0	41.191	By matching	By MS/MS	By MS/MS	By MS/MS	By MS/MS	By MS/MS
AT4G21660.1;AT4G21660.2	AT4G21660.1;AT4G21660.2	3;3	3;3	3;3	>AT4G21660.1 | Symbols: | proline-rich spliceosome-associated (PSP) family protein | chr4:11506259-11509772 REVERSE LENGTH=584;>AT4G21660.2 | Symbols: | proline-rich spliceosome-associated (PSP) family protein | chr4:11506259-11509772 REVERSE LENGTH=598	2	3	3	3	0	0	2	1	2	3	3	3	0	0	2	1	2	3	3	3	0	0	2	1	2	3	3	3	8.9	8.9	8.9	66.833	584	584;598	1	14	0	32.996	By matching	By matching	By MS/MS	By matching	By MS/MS	By MS/MS
AT4G22010.1;AT4G28090.1;AT4G38420.1	AT4G22010.1	8;1;1	8;1;1	7;1;1	>AT4G22010.1 | Symbols: sks4 | SKU5 similar 4 | chr4:11663429-11666463 FORWARD LENGTH=541	3	8	8	7	1	6	8	8	4	5	6	7	1	6	8	8	4	5	6	7	0	5	7	7	3	4	5	6	16.3	16.3	13.3	60.455	541	541;547;549	1	46	0	63.86	By MS/MS	By MS/MS	By MS/MS	By MS/MS	By MS/MS	By MS/MS
AT4G22485.1	AT4G22485.1	5	5	5	>AT4G22485.1 | Symbols: | Bifunctional inhibitor/lipid-transfer protein/seed storage 2S albumin superfamily protein | chr4:11844506-11846476 REVERSE LENGTH=656	1	5	5	5	4	5	4	5	5	5	4	5	4	5	4	5	5	5	4	5	4	5	4	5	5	5	4	5	7.3	7.3	7.3	68.199	656	656	1	37	0	136.48	By MS/MS	By MS/MS	By MS/MS	By MS/MS	By MS/MS	By MS/MS
AT4G23820.1	AT4G23820.1	3	3	3	>AT4G23820.1 | Symbols: | Pectin lyase-like superfamily protein | chr4:12397217-12400050 REVERSE LENGTH=444	1	3	3	3	0	2	3	3	0	3	3	3	0	2	3	3	0	3	3	3	0	2	3	3	0	3	3	3	10.1	10.1	10.1	48.635	444	444	1	17	0	25.473	By matching	By MS/MS	By MS/MS	By MS/MS	By matching	By MS/MS
AT4G24350.1;AT4G24350.2	AT4G24350.1;AT4G24350.2	5;4	5;4	5;4	>AT4G24350.1 | Symbols: | Phosphorylase superfamily protein | chr4:12609637-12611328 FORWARD LENGTH=336;>AT4G24350.2 | Symbols: | Phosphorylase superfamily protein | chr4:12610060-12611328 FORWARD LENGTH=242	2	5	5	5	0	1	4	4	4	3	4	4	0	1	4	4	4	3	4	4	0	1	4	4	4	3	4	4	21.4	21.4	21.4	36.696	336	336;242	1	28	0	39.596	By matching	By matching	By matching	By matching	By MS/MS	By matching
AT4G24780.2;AT4G24780.1;AT1G67750.1;AT5G48900.1	AT4G24780.2;AT4G24780.1	6;6;1;1	6;6;1;1	5;5;0;0	>AT4G24780.2 | Symbols: | Pectin lyase-like superfamily protein | chr4:12770631-12772227 REVERSE LENGTH=408;>AT4G24780.1 | Symbols: | Pectin lyase-like superfamily protein | chr4:12770631-12772227 REVERSE LENGTH=408	4	6	6	5	2	4	5	5	3	5	5	6	2	4	5	5	3	5	5	6	2	4	5	5	3	5	5	5	18.4	18.4	16.2	45.013	408	408;408;408;417	1	37	0	55.307	By MS/MS	By MS/MS	By MS/MS	By MS/MS	By MS/MS	By MS/MS
AT4G25210.1	AT4G25210.1	4	4	4	>AT4G25210.1 | Symbols: | DNA-binding storekeeper protein-related transcriptional regulator | chr4:12918446-12919552 FORWARD LENGTH=368	1	4	4	4	0	1	2	2	2	1	4	4	0	1	2	2	2	1	4	4	0	1	2	2	2	1	4	4	10.1	10.1	10.1	40.274	368	368	1	16	0	23.517	By matching	By matching	By matching	By matching	By matching	By MS/MS
AT4G25550.1	AT4G25550.1	5	5	5	>AT4G25550.1 | Symbols: | Cleavage/polyadenylation specificity factor, 25kDa subunit | chr4:13048519-13050873 FORWARD LENGTH=200	1	5	5	5	2	3	3	5	3	4	5	5	2	3	3	5	3	4	5	5	2	3	3	5	3	4	5	5	30	30	30	22.829	200	200	1	30	0	36.576	By MS/MS	By MS/MS	By MS/MS	By MS/MS	By MS/MS	By MS/MS
AT4G25630.1	AT4G25630.1	6	6	1	>AT4G25630.1 | Symbols: FIB2, ATFIB2 | fibrillarin 2 | chr4:13074239-13076205 FORWARD LENGTH=320	1	6	6	1	3	4	5	6	5	5	6	5	3	4	5	6	5	5	6	5	0	1	1	1	1	1	1	1	21.9	21.9	3.4	33.653	320	320	1	39	0	37.433	By matching	By MS/MS	By MS/MS	By MS/MS	By MS/MS	By MS/MS
AT4G25900.1	AT4G25900.1	5	5	5	>AT4G25900.1 | Symbols: | Galactose mutarotase-like superfamily protein | chr4:13161487-13163397 FORWARD LENGTH=318	1	5	5	5	0	5	4	4	2	5	5	5	0	5	4	4	2	5	5	5	0	5	4	4	2	5	5	5	20.4	20.4	20.4	36.251	318	318	1	34	0	39.345	By matching	By MS/MS	By matching	By MS/MS	By MS/MS	By MS/MS
AT4G26650.2;AT4G26650.1;AT5G55550.4;AT5G55550.1;AT5G55550.3;AT5G55550.2	AT4G26650.2;AT4G26650.1	3;3;1;1;1;1	3;3;1;1;1;1	3;3;1;1;1;1	>AT4G26650.2 | Symbols: | RNA-binding (RRM/RBD/RNP motifs) family protein | chr4:13445265-13447592 FORWARD LENGTH=452;>AT4G26650.1 | Symbols: | RNA-binding (RRM/RBD/RNP motifs) family protein | chr4:13445552-13447592 FORWARD LENGTH=455	6	3	3	3	0	0	0	1	2	1	3	3	0	0	0	1	2	1	3	3	0	0	0	1	2	1	3	3	8.8	8.8	8.8	49.056	452	452;455;448;448;460;460	1	10	0	27.876	By matching	By matching	By matching	By matching	By MS/MS	By MS/MS
AT4G27160.1;AT4G27150.1	AT4G27160.1;AT4G27150.1	2;2	2;2	2;2	>AT4G27160.1 | Symbols: AT2S3, SESA3 | seed storage albumin 3 | chr4:13611836-13612330 FORWARD LENGTH=164;>AT4G27150.1 | Symbols: SESA2, AT2S2 | seed storage albumin 2 | chr4:13609396-13609908 FORWARD LENGTH=170	2	2	2	2	0	1	1	2	1	0	2	2	0	1	1	2	1	0	2	2	0	1	1	2	1	0	2	2	14	14	14	18.762	164	164;170	1	14	0	14.864	By matching	By matching	By matching	By MS/MS	By matching	By matching
AT4G27440.2;AT4G27440.1;AT5G54190.1	AT4G27440.2;AT4G27440.1	5;5;2	5;5;2	4;4;2	>AT4G27440.2 | Symbols: PORB | protochlorophyllide oxidoreductase B | chr4:13725648-13727107 FORWARD LENGTH=401;>AT4G27440.1 | Symbols: PORB | protochlorophyllide oxidoreductase B | chr4:13725648-13727107 FORWARD LENGTH=401	3	5	5	4	0	5	4	4	1	4	3	5	0	5	4	4	1	4	3	5	0	4	3	3	0	3	2	4	12.5	12.5	10.5	43.359	401	401;401;405	1	31	0	31.104	By matching	By matching	By MS/MS	By matching	By matching	By MS/MS
AT4G28080.1	AT4G28080.1	7	7	4	>AT4G28080.1 | Symbols: | Tetratricopeptide repeat (TPR)-like superfamily protein | chr4:13948993-13957840 REVERSE LENGTH=1819	1	7	7	4	0	3	4	4	3	5	7	7	0	3	4	4	3	5	7	7	0	1	2	3	1	2	4	4	4.8	4.8	2.9	199.11	1819	1819	1	33	0	56.874	By matching	By matching	By matching	By matching	By MS/MS	By MS/MS
AT4G28480.1;AT4G28480.2;AT2G20550.2;AT2G20550.1;AT2G20560.1	AT4G28480.1;AT4G28480.2	5;4;1;1;1	5;4;1;1;1	3;2;1;1;1	>AT4G28480.1 | Symbols: | DNAJ heat shock family protein | chr4:14073310-14075091 FORWARD LENGTH=348;>AT4G28480.2 | Symbols: | DNAJ heat shock family protein | chr4:14073310-14075091 FORWARD LENGTH=290	5	5	5	3	0	2	2	2	4	5	5	5	0	2	2	2	4	5	5	5	0	1	1	1	3	3	3	3	18.7	18.7	14.4	38.191	348	348;290;284;284;337	1	25	0	48.888	By matching	By matching	By matching	By MS/MS	By MS/MS	By MS/MS
AT4G28520.1;AT4G28520.3;AT4G28520.2;AT4G28520.4	AT4G28520.1;AT4G28520.3;AT4G28520.2;AT4G28520.4	8;7;5;5	8;7;5;5	8;7;5;5	>AT4G28520.1 | Symbols: CRU3, CRC | cruciferin 3 | chr4:14087596-14089617 FORWARD LENGTH=524;>AT4G28520.3 | Symbols: CRU3, CRC | cruciferin 3 | chr4:14087596-14089617 FORWARD LENGTH=453;>AT4G28520.2 | Symbols: CRU3, CRC | cruciferin 3 | chr4:14087596-14089	4	8	8	8	1	4	5	7	4	8	8	8	1	4	5	7	4	8	8	8	1	4	5	7	4	8	8	8	23.9	23.9	23.9	58.235	524	524;453;394;396	1	51	0	65.801	By matching	By matching	By MS/MS	By MS/MS	By MS/MS	By MS/MS
AT4G29010.1	AT4G29010.1	10	10	10	>AT4G29010.1 | Symbols: AIM1 | Enoyl-CoA hydratase/isomerase family | chr4:14297312-14302016 REVERSE LENGTH=721	1	10	10	10	1	7	7	8	1	8	8	5	1	7	7	8	1	8	8	5	1	7	7	8	1	8	8	5	15.3	15.3	15.3	77.857	721	721	1	45	0	63.44	By matching	By MS/MS	By MS/MS	By MS/MS	By matching	By MS/MS
AT4G30610.1;AT2G24010.1	AT4G30610.1	8;1	8;1	8;1	>AT4G30610.1 | Symbols: BRS1, SCPL24 | alpha/beta-Hydrolases superfamily protein | chr4:14944219-14948391 FORWARD LENGTH=465	2	8	8	8	1	6	8	6	5	8	7	7	1	6	8	6	5	8	7	7	1	6	8	6	5	8	7	7	18.9	18.9	18.9	52.844	465	465;440	1	60	0	129.1	By MS/MS	By MS/MS	By MS/MS	By MS/MS	By MS/MS	By MS/MS
AT4G30690.2;AT4G30690.1	AT4G30690.2;AT4G30690.1	6;6	6;6	5;5	>AT4G30690.2 | Symbols: | Translation initiation factor 3 protein | chr4:14960742-14962328 FORWARD LENGTH=253;>AT4G30690.1 | Symbols: | Translation initiation factor 3 protein | chr4:14960742-14962328 FORWARD LENGTH=281	2	6	6	5	0	5	5	4	3	6	6	6	0	5	5	4	3	6	6	6	0	4	4	3	2	5	5	5	24.9	24.9	21.7	28.24	253	253;281	1	38	0	41.165	By matching	By matching	By matching	By matching	By MS/MS	By MS/MS
AT4G31180.2;AT4G31180.1;AT4G26870.1	AT4G31180.2;AT4G31180.1	9;9;1	9;9;1	9;9;1	>AT4G31180.2 | Symbols: | Class II aminoacyl-tRNA and biotin synthetases superfamily protein | chr4:15156696-15159362 FORWARD LENGTH=558;>AT4G31180.1 | Symbols: | Class II aminoacyl-tRNA and biotin synthetases superfamily protein | chr4:15156696-15159362	3	9	9	9	0	8	9	6	6	9	9	9	0	8	9	6	6	9	9	9	0	8	9	6	6	9	9	9	20.3	20.3	20.3	62.917	558	558;558;532	1	56	0	84.12	By matching	By MS/MS	By MS/MS	By MS/MS	By MS/MS	By MS/MS
AT4G33350.2;AT4G33350.1	AT4G33350.2;AT4G33350.1	2;2	2;2	2;2	>AT4G33350.2 | Symbols: | Tic22-like family protein | chr4:16064638-16066715 REVERSE LENGTH=242;>AT4G33350.1 | Symbols: | Tic22-like family protein | chr4:16064638-16066715 REVERSE LENGTH=268	2	2	2	2	1	2	2	2	2	1	2	2	1	2	2	2	2	1	2	2	1	2	2	2	2	1	2	2	10.3	10.3	10.3	26.973	242	242;268	1	14	0	23.587	By matching	By MS/MS	By MS/MS	By matching	By MS/MS	By MS/MS
AT4G34200.1;AT3G19480.1;AT1G17745.1;AT1G17745.2	AT4G34200.1	4;1;1;1	4;1;1;1	4;1;1;1	>AT4G34200.1 | Symbols: EDA9 | D-3-phosphoglycerate dehydrogenase | chr4:16374041-16376561 REVERSE LENGTH=603	4	4	4	4	0	1	2	3	1	3	4	4	0	1	2	3	1	3	4	4	0	1	2	3	1	3	4	4	7.1	7.1	7.1	63.324	603	603;588;624;651	1	19	0	22.924	By matching	By matching	By matching	By MS/MS	By matching	By MS/MS
AT4G34450.1	AT4G34450.1	2	2	2	>AT4G34450.1 | Symbols: | coatomer gamma-2 subunit, putative / gamma-2 coat protein, putative / gamma-2 COP, putative | chr4:16471956-16476795 FORWARD LENGTH=886	1	2	2	2	1	2	1	1	1	2	2	2	1	2	1	1	1	2	2	2	1	2	1	1	1	2	2	2	2.5	2.5	2.5	98.49	886	886	1	12	0	10.702	By matching	By matching	By matching	By matching	By matching	By MS/MS
AT4G34980.1	AT4G34980.1	3	3	3	>AT4G34980.1 | Symbols: SLP2 | subtilisin-like serine protease 2 | chr4:16656929-16659223 REVERSE LENGTH=764	1	3	3	3	0	1	2	3	0	1	3	3	0	1	2	3	0	1	3	3	0	1	2	3	0	1	3	3	5.2	5.2	5.2	81.045	764	764	1	13	0	18.583	By matching	By matching	By MS/MS	By MS/MS	By matching	By matching
AT4G35000.1;AT4G35970.1	AT4G35000.1	6;1	6;1	6;1	>AT4G35000.1 | Symbols: APX3 | ascorbate peroxidase 3 | chr4:16665007-16667541 REVERSE LENGTH=287	2	6	6	6	2	6	6	6	6	6	6	6	2	6	6	6	6	6	6	6	2	6	6	6	6	6	6	6	27.2	27.2	27.2	31.571	287	287;279	1	50	0	53.778	By matching	By matching	By MS/MS	By MS/MS	By MS/MS	By MS/MS
AT4G35090.2;AT4G35090.1;AT1G20620.2;AT1G20620.5;AT1G20630.1;AT1G20620.1;AT1G20620.4	AT4G35090.2;AT4G35090.1;AT1G20620.2;AT1G20620.5;AT1G20630.1;AT1G20620.1	4;4;2;2;2;2;1	4;4;2;2;2;2;1	4;4;2;2;2;2;1	>AT4G35090.2 | Symbols: CAT2 | catalase 2 | chr4:16701105-16703215 REVERSE LENGTH=474;>AT4G35090.1 | Symbols: CAT2 | catalase 2 | chr4:16700937-16703215 REVERSE LENGTH=492;>AT1G20620.2 | Symbols: CAT3, SEN2, ATCAT3 | catalase 3 | chr1:7143142-7145807 FORWA	7	4	4	4	0	2	4	2	3	3	4	4	0	2	4	2	3	3	4	4	0	2	4	2	3	3	4	4	9.7	9.7	9.7	54.994	474	474;492;427;485;492;492;377	1	22	0	48.753	By matching	By matching	By matching	By MS/MS	By MS/MS	By MS/MS
AT4G35100.2;AT4G35100.1;AT2G16850.1	AT4G35100.2;AT4G35100.1;AT2G16850.1	2;2;1	2;2;1	1;1;0	>AT4G35100.2 | Symbols: PIP3 | plasma membrane intrinsic protein 3 | chr4:16708672-16709958 FORWARD LENGTH=280;>AT4G35100.1 | Symbols: PIP3, PIP3A, PIP2;7, SIMIP | plasma membrane intrinsic protein 3 | chr4:16708672-16709958 FORWARD LENGTH=280;>AT2G16850.1	3	2	2	1	0	2	2	2	0	2	2	2	0	2	2	2	0	2	2	2	0	1	1	1	0	1	1	1	11.1	11.1	6.8	29.742	280	280;280;278	1	12	0	24.461	By matching	By MS/MS	By MS/MS	By MS/MS	By matching	By MS/MS
AT4G35250.1	AT4G35250.1	6	6	6	>AT4G35250.1 | Symbols: | NAD(P)-binding Rossmann-fold superfamily protein | chr4:16771401-16773269 REVERSE LENGTH=395	1	6	6	6	0	3	5	3	4	5	6	6	0	3	5	3	4	5	6	6	0	3	5	3	4	5	6	6	18	18	18	43.723	395	395	1	32	0	44.067	By matching	By matching	By MS/MS	By MS/MS	By MS/MS	By MS/MS
AT4G35630.1	AT4G35630.1	4	4	2	>AT4G35630.1 | Symbols: PSAT | phosphoserine aminotransferase | chr4:16904205-16905497 FORWARD LENGTH=430	1	4	4	2	0	3	3	3	4	4	4	4	0	3	3	3	4	4	4	4	0	2	1	1	2	2	2	2	13	13	7.4	47.359	430	430	1	25	0	29.321	By matching	By MS/MS	By MS/MS	By MS/MS	By MS/MS	By MS/MS
AT4G36730.2;AT4G36730.1	AT4G36730.2;AT4G36730.1	2;2	2;2	2;2	>AT4G36730.2 | Symbols: GBF1 | G-box binding factor 1 | chr4:17309850-17311752 REVERSE LENGTH=313;>AT4G36730.1 | Symbols: GBF1 | G-box binding factor 1 | chr4:17309850-17311752 REVERSE LENGTH=315	2	2	2	2	0	0	0	1	1	2	2	2	0	0	0	1	1	2	2	2	0	0	0	1	1	2	2	2	11.2	11.2	11.2	33.675	313	313;315	1	8	0	23.97	By matching	By matching	By matching	By matching	By MS/MS	By MS/MS
AT4G37930.1;AT5G26780.1;AT5G26780.3;AT5G26780.2	AT4G37930.1	9;3;3;3	9;3;3;3	9;3;3;3	>AT4G37930.1 | Symbols: SHM1, STM, SHMT1 | serine transhydroxymethyltransferase 1 | chr4:17831891-17834742 REVERSE LENGTH=517	4	9	9	9	4	4	9	6	3	8	9	8	4	4	9	6	3	8	9	8	4	4	9	6	3	8	9	8	21.3	21.3	21.3	57.4	517	517;517;533;533	1	59	0	94.744	By matching	By MS/MS	By MS/MS	By MS/MS	By MS/MS	By MS/MS
AT4G38970.1;AT4G38970.2	AT4G38970.1;AT4G38970.2	13;9	13;9	7;6	>AT4G38970.1 | Symbols: FBA2 | fructose-bisphosphate aldolase 2 | chr4:18163714-18165659 REVERSE LENGTH=398;>AT4G38970.2 | Symbols: FBA2 | fructose-bisphosphate aldolase 2 | chr4:18163769-18165659 REVERSE LENGTH=381	2	13	13	7	10	9	13	13	12	13	13	13	10	9	13	13	12	13	13	13	6	7	7	7	7	7	7	7	43	43	27.6	42.987	398	398;381	1	115	0	301.55	By MS/MS	By MS/MS	By MS/MS	By MS/MS	By MS/MS	By MS/MS
AT4G39100.2;AT4G39100.1	AT4G39100.2;AT4G39100.1	4;4	4;4	4;4	>AT4G39100.2 | Symbols: SHL1 | PHD finger family protein / bromo-adjacent homology (BAH) domain-containing protein | chr4:18218712-18220134 REVERSE LENGTH=169;>AT4G39100.1 | Symbols: SHL1 | PHD finger family protein / bromo-adjacent homology (BAH) domain-c	2	4	4	4	0	1	2	3	1	3	3	4	0	1	2	3	1	3	3	4	0	1	2	3	1	3	3	4	27.2	27.2	27.2	19.452	169	169;228	1	17	0	26.209	By matching	By matching	By matching	By MS/MS	By matching	By MS/MS
AT4G39640.2;AT4G39640.1	AT4G39640.2;AT4G39640.1	6;6	6;6	6;6	>AT4G39640.2 | Symbols: GGT1 | gamma-glutamyl transpeptidase 1 | chr4:18400608-18402861 FORWARD LENGTH=572;>AT4G39640.1 | Symbols: GGT1 | gamma-glutamyl transpeptidase 1 | chr4:18400608-18402861 FORWARD LENGTH=572	2	6	6	6	0	4	4	3	2	4	5	3	0	4	4	3	2	4	5	3	0	4	4	3	2	4	5	3	12.2	12.2	12.2	61.189	572	572;572	1	32	0	38.368	By matching	By MS/MS	By MS/MS	By MS/MS	By MS/MS	By MS/MS
AT4G39680.2;AT4G39680.1	AT4G39680.2;AT4G39680.1	5;5	5;5	5;5	>AT4G39680.2 | Symbols: | SAP domain-containing protein | chr4:18414604-18416938 REVERSE LENGTH=633;>AT4G39680.1 | Symbols: | SAP domain-containing protein | chr4:18414604-18416938 REVERSE LENGTH=633	2	5	5	5	0	0	2	2	2	3	3	3	0	0	2	2	2	3	3	3	0	0	2	2	2	3	3	3	11.8	11.8	11.8	69.441	633	633;633	1	15	0	39.445	By matching	By matching	By matching	By MS/MS	By MS/MS	By MS/MS
AT4G39960.1	AT4G39960.1	14	8	8	>AT4G39960.1 | Symbols: | Molecular chaperone Hsp40/DnaJ family protein | chr4:18534194-18536320 FORWARD LENGTH=447	1	14	8	8	4	5	12	13	9	12	13	14	3	4	8	8	7	7	8	8	3	4	8	8	7	7	8	8	31.1	22.8	22.8	48.031	447	447	1	85	0	196.9	By MS/MS	By MS/MS	By MS/MS	By MS/MS	By MS/MS	By MS/MS
AT5G01920.1	AT5G01920.1	6	6	6	>AT5G01920.1 | Symbols: STN8 | Protein kinase superfamily protein | chr5:359154-360867 FORWARD LENGTH=495	1	6	6	6	0	0	6	6	2	1	6	5	0	0	6	6	2	1	6	5	0	0	6	6	2	1	6	5	12.7	12.7	12.7	54.978	495	495	1	26	0	36.252	By matching	By matching	By MS/MS	By MS/MS	By matching	By matching
AT5G02500.1;AT5G02500.2;AT3G09440.2;AT3G09440.1;AT5G02490.1;AT1G56410.1	AT5G02500.1;AT5G02500.2;AT3G09440.2;AT3G09440.1;AT5G02490.1;AT1G56410.1	13;11;11;11;10;9	11;9;9;9;8;7	4;4;2;2;1;1	>AT5G02500.1 | Symbols: HSC70-1, HSP70-1, AT-HSC70-1, HSC70 | heat shock cognate protein 70-1 | chr5:554055-556334 REVERSE LENGTH=651;>AT5G02500.2 | Symbols: HSC70-1, HSP70-1, AT-HSC70-1, HSC70 | heat shock cognate protein 70-1 | chr5:554055-556334 REVERSE	6	13	11	4	2	9	12	10	8	10	12	12	1	7	10	8	6	8	10	10	0	3	4	2	3	3	4	4	21.8	19.2	7.7	71.357	651	651;521;649;649;653;617	1	75	0	84.783	By matching	By matching	By MS/MS	By MS/MS	By MS/MS	By MS/MS
AT5G02530.2;AT5G02530.1	AT5G02530.2;AT5G02530.1	7;7	7;7	6;6	>AT5G02530.2 | Symbols: | RNA-binding (RRM/RBD/RNP motifs) family protein | chr5:564332-565776 REVERSE LENGTH=290;>AT5G02530.1 | Symbols: | RNA-binding (RRM/RBD/RNP motifs) family protein | chr5:564332-565776 REVERSE LENGTH=292	2	7	7	6	6	4	6	4	5	6	6	6	6	4	6	4	5	6	6	6	5	4	5	4	4	5	5	5	23.1	23.1	20	30.566	290	290;292	1	50	0	112.77	By MS/MS	By MS/MS	By MS/MS	By MS/MS	By MS/MS	By MS/MS
AT5G03350.1	AT5G03350.1	3	3	3	>AT5G03350.1 | Symbols: | Legume lectin family protein | chr5:815804-816628 REVERSE LENGTH=274	1	3	3	3	2	2	3	1	2	2	2	2	2	2	3	1	2	2	2	2	2	2	3	1	2	2	2	2	13.9	13.9	13.9	30.162	274	274	1	16	0	18.032	By matching	By matching	By MS/MS	By matching	By matching	By matching
AT5G03740.1	AT5G03740.1	6	6	6	>AT5G03740.1 | Symbols: HD2C, HDT3 | histone deacetylase 2C | chr5:981994-983961 FORWARD LENGTH=294	1	6	6	6	0	4	4	5	4	6	6	6	0	4	4	5	4	6	6	6	0	4	4	5	4	6	6	6	29.3	29.3	29.3	31.83	294	294	1	41	0	82.906	By matching	By MS/MS	By MS/MS	By matching	By MS/MS	By MS/MS
AT5G03940.1	AT5G03940.1	2	2	2	>AT5G03940.1 | Symbols: FFC, 54CP, CPSRP54, SRP54CP | chloroplast signal recognition particle 54 kDa subunit | chr5:1060265-1063257 REVERSE LENGTH=564	1	2	2	2	0	1	1	2	1	1	2	2	0	1	1	2	1	1	2	2	0	1	1	2	1	1	2	2	4.4	4.4	4.4	61.232	564	564	1	10	0	12.517	By matching	By matching	By matching	By matching	By MS/MS	By matching
AT5G04280.1	AT5G04280.1	4	4	4	>AT5G04280.1 | Symbols: | RNA-binding (RRM/RBD/RNP motifs) family protein with retrovirus zinc finger-like domain | chr5:1192461-1195413 FORWARD LENGTH=310	1	4	4	4	0	1	3	1	2	2	3	4	0	1	3	1	2	2	3	4	0	1	3	1	2	2	3	4	14.2	14.2	14.2	33.486	310	310	1	16	0	35.45	By matching	By MS/MS	By matching	By MS/MS	By MS/MS	By MS/MS
AT5G06160.1	AT5G06160.1	4	4	4	>AT5G06160.1 | Symbols: ATO | splicing factor-related | chr5:1862623-1866298 REVERSE LENGTH=504	1	4	4	4	0	0	3	2	1	4	4	4	0	0	3	2	1	4	4	4	0	0	3	2	1	4	4	4	8.1	8.1	8.1	58.971	504	504	1	18	0	23.643	By matching	By matching	By matching	By MS/MS	By matching	By MS/MS
AT5G06860.1	AT5G06860.1	2	2	2	>AT5G06860.1 | Symbols: PGIP1, ATPGIP1 | polygalacturonase inhibiting protein 1 | chr5:2132373-2133434 FORWARD LENGTH=330	1	2	2	2	0	1	2	2	1	2	2	1	0	1	2	2	1	2	2	1	0	1	2	2	1	2	2	1	9.7	9.7	9.7	36.689	330	330	1	11	0	11.864	By matching	By matching	By matching	By matching	By MS/MS	By MS/MS
AT5G06870.1	AT5G06870.1	3	3	3	>AT5G06870.1 | Symbols: PGIP2, ATPGIP2 | polygalacturonase inhibiting protein 2 | chr5:2133941-2135016 FORWARD LENGTH=330	1	3	3	3	0	2	3	3	2	2	3	3	0	2	3	3	2	2	3	3	0	2	3	3	2	2	3	3	12.4	12.4	12.4	37.067	330	330	1	18	0	31.288	By matching	By MS/MS	By MS/MS	By MS/MS	By MS/MS	By matching
AT5G07030.1	AT5G07030.1	4	4	4	>AT5G07030.1 | Symbols: | Eukaryotic aspartyl protease family protein | chr5:2183600-2185717 REVERSE LENGTH=455	1	4	4	4	0	2	4	4	1	3	4	4	0	2	4	4	1	3	4	4	0	2	4	4	1	3	4	4	9.7	9.7	9.7	48.694	455	455	1	28	0	56.066	By matching	By matching	By MS/MS	By MS/MS	By matching	By MS/MS
AT5G08540.1	AT5G08540.1	12	12	12	>AT5G08540.1 | Symbols: | unknown protein; FUNCTIONS IN: molecular_function unknown; INVOLVED IN: biological_process unknown; LOCATED IN: chloroplast thylakoid membrane, chloroplast, chloroplast envelope; EXPRESSED IN: 24 plant structures; EXPRESSED DURIN	1	12	12	12	2	7	11	10	7	9	11	9	2	7	11	10	7	9	11	9	2	7	11	10	7	9	11	9	41	41	41	38.655	346	346	1	80	0	97.565	By MS/MS	By MS/MS	By MS/MS	By MS/MS	By matching	By MS/MS
AT5G09440.1	AT5G09440.1	4	4	3	>AT5G09440.1 | Symbols: EXL4 | EXORDIUM like 4 | chr5:2938397-2939233 FORWARD LENGTH=278	1	4	4	3	1	3	3	3	2	4	3	4	1	3	3	3	2	4	3	4	0	2	2	2	1	3	2	3	16.2	16.2	12.2	29.474	278	278	1	23	0	97.356	By matching	By MS/MS	By MS/MS	By MS/MS	By MS/MS	By MS/MS
AT5G09660.2;AT5G09660.1;AT5G09660.3;AT5G09660.4	AT5G09660.2;AT5G09660.1;AT5G09660.3;AT5G09660.4	5;5;3;3	5;5;3;3	5;5;3;3	>AT5G09660.2 | Symbols: PMDH2 | peroxisomal NAD-malate dehydrogenase 2 | chr5:2993645-2995169 REVERSE LENGTH=333;>AT5G09660.1 | Symbols: PMDH2 | peroxisomal NAD-malate dehydrogenase 2 | chr5:2993645-2995551 REVERSE LENGTH=354;>AT5G09660.3 | Symbols: PMDH2	4	5	5	5	1	4	4	5	3	3	4	4	1	4	4	5	3	3	4	4	1	4	4	5	3	3	4	4	20.7	20.7	20.7	34.975	333	333;354;342;363	1	28	0	82.419	By matching	By matching	By MS/MS	By MS/MS	By MS/MS	By MS/MS
AT5G11560.1	AT5G11560.1	3	3	3	>AT5G11560.1 | Symbols: | catalytics | chr5:3709734-3713994 REVERSE LENGTH=982	1	3	3	3	0	1	1	1	0	2	3	2	0	1	1	1	0	2	3	2	0	1	1	1	0	2	3	2	3.4	3.4	3.4	108.87	982	982	1	10	0	16.408	By matching	By matching	By matching	By MS/MS	By matching	By MS/MS
AT5G12190.1	AT5G12190.1	2	2	2	>AT5G12190.1 | Symbols: | RNA-binding (RRM/RBD/RNP motifs) family protein | chr5:3940731-3941105 REVERSE LENGTH=124	1	2	2	2	1	2	2	1	2	2	2	2	1	2	2	1	2	2	2	2	1	2	2	1	2	2	2	2	25	25	25	14.382	124	124	1	14	0	12.83	By matching	By matching	By MS/MS	By MS/MS	By matching	By matching
AT5G14660.2;AT5G14660.1	AT5G14660.2;AT5G14660.1	3;3	3;3	3;3	>AT5G14660.2 | Symbols: PDF1B, DEF2, ATDEF2 | peptide deformylase 1B | chr5:4727129-4728671 REVERSE LENGTH=273;>AT5G14660.1 | Symbols: PDF1B, DEF2, ATDEF2 | peptide deformylase 1B | chr5:4727129-4728671 REVERSE LENGTH=273	2	3	3	3	0	1	3	3	2	3	3	3	0	1	3	3	2	3	3	3	0	1	3	3	2	3	3	3	12.1	12.1	12.1	30.61	273	273;273	1	18	0	21.554	By matching	By matching	By MS/MS	By MS/MS	By matching	By MS/MS
AT5G17170.1;AT5G17170.2	AT5G17170.1;AT5G17170.2	7;5	7;5	7;5	>AT5G17170.1 | Symbols: ENH1 | rubredoxin family protein | chr5:5649335-5650975 FORWARD LENGTH=271;>AT5G17170.2 | Symbols: ENH1 | rubredoxin family protein | chr5:5649335-5650835 FORWARD LENGTH=224	2	7	7	7	5	7	7	7	7	6	6	7	5	7	7	7	7	6	6	7	5	7	7	7	7	6	6	7	39.1	39.1	39.1	28.458	271	271;224	1	76	0	277.58	By MS/MS	By MS/MS	By MS/MS	By MS/MS	By MS/MS	By MS/MS
AT5G19220.1	AT5G19220.1	3	3	3	>AT5G19220.1 | Symbols: ADG2, APL1 | ADP glucose pyrophosphorylase large subunit 1 | chr5:6463931-6466775 REVERSE LENGTH=522	1	3	3	3	0	2	2	2	2	3	3	3	0	2	2	2	2	3	3	3	0	2	2	2	2	3	3	3	8.2	8.2	8.2	57.673	522	522	1	17	0	21.679	By matching	By matching	By MS/MS	By matching	By MS/MS	By MS/MS
AT5G19780.1;AT5G19770.1;AT1G64740.1	AT5G19780.1;AT5G19770.1;AT1G64740.1	4;4;3	4;4;3	1;1;1	>AT5G19780.1 | Symbols: TUA5 | tubulin alpha-5 | chr5:6687212-6688926 FORWARD LENGTH=450;>AT5G19770.1 | Symbols: TUA3 | tubulin alpha-3 | chr5:6682761-6684474 REVERSE LENGTH=450;>AT1G64740.1 | Symbols: TUA1 | alpha-1 tubulin | chr1:24050114-24052296 FORWAR	3	4	4	1	3	3	3	1	3	3	3	1	3	3	3	1	3	3	3	1	1	1	1	0	1	1	1	0	14.2	14.2	4.7	49.654	450	450;450;450	1	33	0	323.31	By MS/MS	By MS/MS	By MS/MS	By matching	By MS/MS	By MS/MS
AT5G20630.1	AT5G20630.1	4	4	4	>AT5G20630.1 | Symbols: GLP3, GLP3A, GLP3B, ATGER3, GER3 | germin 3 | chr5:6975315-6975950 REVERSE LENGTH=211	1	4	4	4	2	3	4	4	3	4	4	4	2	3	4	4	3	4	4	4	2	3	4	4	3	4	4	4	29.4	29.4	29.4	21.836	211	211	1	32	0	48.86	By MS/MS	By matching	By MS/MS	By MS/MS	By MS/MS	By MS/MS
AT5G20920.3;AT5G20920.1;AT5G20920.2	AT5G20920.3;AT5G20920.1;AT5G20920.2	11;11;10	11;11;10	11;11;10	>AT5G20920.3 | Symbols: EIF2 BETA | eukaryotic translation initiation factor 2 beta subunit | chr5:7094994-7096661 REVERSE LENGTH=268;>AT5G20920.1 | Symbols: EIF2 BETA, EMB1401 | eukaryotic translation initiation factor 2 beta subunit | chr5:7094994-709666	3	11	11	11	3	9	11	8	7	10	10	10	3	9	11	8	7	10	10	10	3	9	11	8	7	10	10	10	53.4	53.4	53.4	30.663	268	268;268;267	1	83	0	125.21	By matching	By MS/MS	By MS/MS	By MS/MS	By MS/MS	By MS/MS
AT5G20950.2;AT5G20950.1;AT3G47050.2;AT3G47000.1;AT3G47050.1	AT5G20950.2;AT5G20950.1	6;6;1;1;1	6;6;1;1;1	6;6;1;1;1	>AT5G20950.2 | Symbols: | Glycosyl hydrolase family protein | chr5:7107609-7110775 REVERSE LENGTH=624;>AT5G20950.1 | Symbols: | Glycosyl hydrolase family protein | chr5:7107609-7110775 REVERSE LENGTH=624	5	6	6	6	0	6	6	6	1	6	5	5	0	6	6	6	1	6	5	5	0	6	6	6	1	6	5	5	12.2	12.2	12.2	67.926	624	624;624;447;608;612	1	41	0	55.321	By matching	By MS/MS	By MS/MS	By MS/MS	By matching	By MS/MS
AT5G22060.1	AT5G22060.1	12	3	3	>AT5G22060.1 | Symbols: ATJ2, J2 | DNAJ homologue 2 | chr5:7303798-7305668 REVERSE LENGTH=419	1	12	3	3	0	5	9	9	7	8	11	11	0	1	1	2	1	1	3	3	0	1	1	2	1	1	3	3	28.6	8.8	8.8	46.438	419	419	1	12	0	41.085	By matching	By matching	By matching	By matching	By MS/MS	By MS/MS
AT5G22650.2;AT5G22650.1	AT5G22650.2;AT5G22650.1	6;6	6;6	6;6	>AT5G22650.2 | Symbols: HD2B, HDT02, HDT2, ATHD2B, HDA4, HD2 | histone deacetylase 2B | chr5:7534120-7536054 FORWARD LENGTH=305;>AT5G22650.1 | Symbols: HD2B, HDT02, HDT2, ATHD2B, HDA4, HD2, ATHD2 | histone deacetylase 2B | chr5:7534120-7536054 FORWARD LENG	2	6	6	6	1	2	5	4	4	4	5	5	1	2	5	4	4	4	5	5	1	2	5	4	4	4	5	5	25.9	25.9	25.9	32.218	305	305;306	1	32	0	111.32	By matching	By matching	By matching	By MS/MS	By MS/MS	By MS/MS
AT5G22880.1;AT3G46030.1;AT1G07790.1;AT5G59910.1;AT3G45980.1;AT2G28720.1;AT5G02570.1;AT2G37470.1;AT3G09480.1;AT3G53650.1	AT5G22880.1;AT3G46030.1;AT1G07790.1;AT5G59910.1;AT3G45980.1;AT2G28720.1;AT5G02570.1;AT2G37470.1	4;3;3;3;3;3;2;2;1;1	4;3;3;3;3;3;2;2;1;1	4;3;3;3;3;3;2;2;1;1	>AT5G22880.1 | Symbols: H2B, HTB2 | histone B2 | chr5:7652130-7652567 REVERSE LENGTH=145;>AT3G46030.1 | Symbols: HTB11 | Histone superfamily protein | chr3:16913614-16914051 REVERSE LENGTH=145;>AT1G07790.1 | Symbols: HTB1 | Histone superfamily protein | ch	10	4	4	4	2	1	4	3	1	3	4	2	2	1	4	3	1	3	4	2	2	1	4	3	1	3	4	2	32.4	32.4	32.4	15.732	145	145;145;148;150;150;151;132;138;126;138	1	29	0	33.359	By MS/MS	By MS/MS	By MS/MS	By MS/MS	By MS/MS	By MS/MS
AT5G23060.1	AT5G23060.1	16	16	16	>AT5G23060.1 | Symbols: CaS | calcium sensing receptor | chr5:7736760-7738412 REVERSE LENGTH=387	1	16	16	16	12	15	15	14	12	15	14	15	12	15	15	14	12	15	14	15	12	15	15	14	12	15	14	15	48.3	48.3	48.3	41.285	387	387	1	131	0	323.31	By MS/MS	By MS/MS	By MS/MS	By MS/MS	By MS/MS	By MS/MS
AT5G23210.2;AT5G23210.1;AT5G23210.4;AT5G23210.3;AT3G63470.1	AT5G23210.2;AT5G23210.1;AT5G23210.4;AT5G23210.3	9;9;7;7;1	9;9;7;7;1	9;9;7;7;1	>AT5G23210.2 | Symbols: SCPL34 | serine carboxypeptidase-like 34 | chr5:7811625-7814837 FORWARD LENGTH=403;>AT5G23210.1 | Symbols: SCPL34 | serine carboxypeptidase-like 34 | chr5:7810892-7814837 FORWARD LENGTH=499;>AT5G23210.4 | Symbols: SCPL34 | serine ca	5	9	9	9	2	4	6	8	6	8	9	9	2	4	6	8	6	8	9	9	2	4	6	8	6	8	9	9	25.1	25.1	25.1	45.726	403	403;499;363;459;502	1	66	0	137.7	By matching	By MS/MS	By MS/MS	By MS/MS	By MS/MS	By MS/MS
AT5G24490.1	AT5G24490.1	5	5	5	>AT5G24490.1 | Symbols: | 30S ribosomal protein, putative | chr5:8365690-8367178 FORWARD LENGTH=308	1	5	5	5	3	2	4	3	2	5	5	4	3	2	4	3	2	5	5	4	3	2	4	3	2	5	5	4	19.2	19.2	19.2	34.856	308	308	1	33	0	86.51	By matching	By MS/MS	By MS/MS	By MS/MS	By matching	By MS/MS
AT5G25460.1	AT5G25460.1	10	10	5	>AT5G25460.1 | Symbols: | Protein of unknown function, DUF642 | chr5:8863430-8865394 FORWARD LENGTH=369	1	10	10	5	3	8	10	10	6	9	9	8	3	8	10	10	6	9	9	8	0	4	5	5	1	4	4	3	32.8	32.8	16.3	39.978	369	369	1	83	0	223.67	By matching	By MS/MS	By MS/MS	By MS/MS	By MS/MS	By MS/MS
AT5G25610.1	AT5G25610.1	2	2	2	>AT5G25610.1 | Symbols: RD22, ATRD22 | BURP domain-containing protein | chr5:8914498-8916684 REVERSE LENGTH=392	1	2	2	2	0	0	2	2	0	0	2	2	0	0	2	2	0	0	2	2	0	0	2	2	0	0	2	2	6.6	6.6	6.6	42.259	392	392	1	8	0	12.728	By matching	By matching	By matching	By MS/MS	By matching	By matching
AT5G25980.2;AT5G25980.3;AT5G25980.1;AT5G48375.1	AT5G25980.2;AT5G25980.3;AT5G25980.1	12;11;11;1	12;11;11;1	11;10;10;1	>AT5G25980.2 | Symbols: TGG2, BGLU37 | glucoside glucohydrolase 2 | chr5:9072730-9075477 FORWARD LENGTH=547;>AT5G25980.3 | Symbols: TGG2, BGLU37 | glucoside glucohydrolase 2 | chr5:9072730-9075143 FORWARD LENGTH=467;>AT5G25980.1 | Symbols: TGG2, BGLU37 | g	4	12	12	11	7	7	9	9	10	11	10	9	7	7	9	9	10	11	10	9	7	6	8	8	10	10	9	8	30	30	28	62.731	547	547;467;467;439	1	107	0	108.1	By MS/MS	By MS/MS	By MS/MS	By MS/MS	By MS/MS	By MS/MS
AT5G26830.1	AT5G26830.1	12	12	12	>AT5G26830.1 | Symbols: | Threonyl-tRNA synthetase | chr5:9437351-9441568 FORWARD LENGTH=709	1	12	12	12	0	7	9	6	8	12	11	10	0	7	9	6	8	12	11	10	0	7	9	6	8	12	11	10	16.6	16.6	16.6	80.935	709	709	1	65	0	115.6	By matching	By matching	By MS/MS	By matching	By MS/MS	By MS/MS
AT5G27120.1	AT5G27120.1	3	2	2	>AT5G27120.1 | Symbols: | NOP56-like pre RNA processing ribonucleoprotein | chr5:9541287-9543684 FORWARD LENGTH=533	1	3	2	2	1	3	3	3	2	3	3	3	1	2	2	2	1	2	2	2	1	2	2	2	1	2	2	2	6.9	4.5	4.5	58.754	533	533	1	14	0	13.278	By matching	By matching	By MS/MS	By MS/MS	By matching	By MS/MS
AT5G27640.1;AT5G27640.2;AT5G25780.1	AT5G27640.1;AT5G27640.2;AT5G25780.1	3;3;2	3;3;2	3;3;2	>AT5G27640.1 | Symbols: TIF3B1, EIF3B, ATEIF3B-1, EIF3B-1, ATTIF3B1 | translation initiation factor 3B1 | chr5:9781207-9784759 REVERSE LENGTH=712;>AT5G27640.2 | Symbols: TIF3B1, EIF3B, ATEIF3B-1, EIF3B-1, ATTIF3B1 | translation initiation factor 3B1 | chr5	3	3	3	3	0	1	2	2	1	3	2	3	0	1	2	2	1	3	2	3	0	1	2	2	1	3	2	3	5.1	5.1	5.1	81.874	712	712;738;714	1	14	0	17.168	By matching	By matching	By matching	By matching	By matching	By MS/MS
AT5G28540.1;AT5G42020.1;AT5G42020.2;AT1G09080.2;AT1G09080.1	AT5G28540.1;AT5G42020.1;AT5G42020.2	16;15;14;2;2	16;15;14;2;2	14;13;12;2;2	>AT5G28540.1 | Symbols: BIP1 | heat shock protein 70 (Hsp 70) family protein | chr5:10540665-10543274 REVERSE LENGTH=669;>AT5G42020.1 | Symbols: BIP, BIP2 | Heat shock protein 70 (Hsp 70) family protein | chr5:16807697-16810480 REVERSE LENGTH=668;>AT5G4202	5	16	16	14	2	10	10	11	9	12	14	10	2	10	10	11	9	12	14	10	1	8	8	9	7	10	12	8	27.1	27.1	24.5	73.628	669	669;668;613;665;675	1	92	0	161.68	By matching	By MS/MS	By MS/MS	By MS/MS	By MS/MS	By MS/MS
AT5G30510.1	AT5G30510.1	4	4	4	>AT5G30510.1 | Symbols: RPS1, ARRPS1 | ribosomal protein S1 | chr5:11619262-11621223 REVERSE LENGTH=416	1	4	4	4	0	2	3	2	1	4	3	4	0	2	3	2	1	4	3	4	0	2	3	2	1	4	3	4	9.4	9.4	9.4	45.11	416	416	1	20	0	23.495	By matching	By matching	By matching	By matching	By MS/MS	By MS/MS
AT5G35630.3;AT5G35630.2;AT5G35630.1	AT5G35630.3;AT5G35630.2;AT5G35630.1	2;2;2	2;2;2	2;2;2	>AT5G35630.3 | Symbols: GS2, GLN2, ATGSL1 | glutamine synthetase 2 | chr5:13831220-13833239 FORWARD LENGTH=430;>AT5G35630.2 | Symbols: GS2, GLN2, ATGSL1 | glutamine synthetase 2 | chr5:13831220-13833239 FORWARD LENGTH=430;>AT5G35630.1 | Symbols: GS2, GLN2,	3	2	2	2	0	1	2	1	1	2	2	2	0	1	2	1	1	2	2	2	0	1	2	1	1	2	2	2	6.7	6.7	6.7	47.41	430	430;430;430	1	11	0	17.926	By matching	By MS/MS	By MS/MS	By matching	By matching	By MS/MS
AT5G40490.1	AT5G40490.1	5	5	5	>AT5G40490.1 | Symbols: | RNA-binding (RRM/RBD/RNP motifs) family protein | chr5:16225483-16227423 FORWARD LENGTH=423	1	5	5	5	0	2	2	2	4	4	4	5	0	2	2	2	4	4	4	5	0	2	2	2	4	4	4	5	15.8	15.8	15.8	42.407	423	423	1	33	0	66.103	By matching	By MS/MS	By MS/MS	By MS/MS	By MS/MS	By MS/MS
AT5G44120.3;AT5G44120.2;AT5G44120.1	AT5G44120.3;AT5G44120.2;AT5G44120.1	7;6;5	7;6;5	7;6;5	>AT5G44120.3 | Symbols: CRA1, ATCRA1, CRU1 | RmlC-like cupins superfamily protein | chr5:17756460-17758246 REVERSE LENGTH=472;>AT5G44120.2 | Symbols: CRA1, ATCRA1, CRU1 | RmlC-like cupins superfamily protein | chr5:17756460-17757811 REVERSE LENGTH=368;>AT5	3	7	7	7	0	3	6	4	6	7	7	7	0	3	6	4	6	7	7	7	0	3	6	4	6	7	7	7	19.9	19.9	19.9	52.594	472	472;368;285	1	43	0	81.079	By matching	By matching	By matching	By matching	By MS/MS	By MS/MS
AT5G46070.1	AT5G46070.1	7	7	7	>AT5G46070.1 | Symbols: | Guanylate-binding family protein | chr5:18683468-18688397 FORWARD LENGTH=1082	1	7	7	7	1	5	5	5	6	7	6	7	1	5	5	5	6	7	6	7	1	5	5	5	6	7	6	7	9.6	9.6	9.6	122.78	1082	1082	1	44	0	50.98	By matching	By matching	By MS/MS	By matching	By MS/MS	By MS/MS
AT5G47500.1	AT5G47500.1	3	3	3	>AT5G47500.1 | Symbols: | Pectin lyase-like superfamily protein | chr5:19271262-19272845 REVERSE LENGTH=362	1	3	3	3	0	2	2	3	1	2	3	2	0	2	2	3	1	2	3	2	0	2	2	3	1	2	3	2	9.1	9.1	9.1	40.042	362	362	1	16	0	17.097	By matching	By matching	By matching	By MS/MS	By matching	By MS/MS
AT5G49360.1	AT5G49360.1	16	16	16	>AT5G49360.1 | Symbols: BXL1, ATBXL1 | beta-xylosidase 1 | chr5:20012179-20016659 REVERSE LENGTH=774	1	16	16	16	3	12	15	15	4	11	13	9	3	12	15	15	4	11	13	9	3	12	15	15	4	11	13	9	29.6	29.6	29.6	83.523	774	774	1	98	0	323.31	By matching	By MS/MS	By MS/MS	By MS/MS	By MS/MS	By MS/MS
AT5G50920.1;AT3G48870.2;AT3G48870.1;AT2G25140.1	AT5G50920.1;AT3G48870.2;AT3G48870.1	15;10;10;1	15;10;10;1	15;10;10;1	>AT5G50920.1 | Symbols: CLPC, ATHSP93-V, HSP93-V, DCA1, CLPC1 | CLPC homologue 1 | chr5:20715710-20719800 REVERSE LENGTH=929;>AT3G48870.2 | Symbols: HSP93-III | Clp ATPase | chr3:18122363-18125915 REVERSE LENGTH=921;>AT3G48870.1 | Symbols: ATCLPC, ATHSP93-	4	15	15	15	2	13	14	15	8	13	15	13	2	13	14	15	8	13	15	13	2	13	14	15	8	13	15	13	19.5	19.5	19.5	103.45	929	929;921;952;964	1	96	0	257.46	By matching	By MS/MS	By MS/MS	By MS/MS	By MS/MS	By MS/MS
AT5G51010.1	AT5G51010.1	4	4	4	>AT5G51010.1 | Symbols: | Rubredoxin-like superfamily protein | chr5:20744615-20745344 FORWARD LENGTH=154	1	4	4	4	1	2	4	3	2	3	4	3	1	2	4	3	2	3	4	3	1	2	4	3	2	3	4	3	23.4	23.4	23.4	17.23	154	154	1	26	0	69.601	By matching	By MS/MS	By MS/MS	By MS/MS	By matching	By MS/MS
AT5G51750.1	AT5G51750.1	2	2	2	>AT5G51750.1 | Symbols: ATSBT1.3, SBT1.3 | subtilase 1.3 | chr5:21020266-21022608 FORWARD LENGTH=780	1	2	2	2	0	1	2	2	0	1	2	2	0	1	2	2	0	1	2	2	0	1	2	2	0	1	2	2	2.8	2.8	2.8	84.949	780	780	1	10	0	12.266	By matching	By matching	By MS/MS	By MS/MS	By matching	By matching
AT5G52640.1;AT5G56030.1;AT5G56010.1;AT5G56000.1;AT5G56030.2	AT5G52640.1;AT5G56030.1;AT5G56010.1;AT5G56000.1;AT5G56030.2	4;3;3;3;2	4;3;3;3;2	4;3;3;3;2	>AT5G52640.1 | Symbols: HSP81-1, ATHS83, HSP81.1, HSP83, ATHSP90.1, AtHsp90-1, HSP90.1 | heat shock protein 90.1 | chr5:21352542-21355147 FORWARD LENGTH=705;>AT5G56030.1 | Symbols: HSP81-2, ERD8, HSP90.2, AtHsp90.2 | heat shock protein 81-2 | chr5:22686923	5	4	4	4	0	1	3	2	1	2	4	3	0	1	3	2	1	2	4	3	0	1	3	2	1	2	4	3	6.7	6.7	6.7	81.179	705	705;699;699;699;728	1	19	0	26.015	By matching	By MS/MS	By MS/MS	By matching	By matching	By matching
AT5G53580.1	AT5G53580.1	7	7	7	>AT5G53580.1 | Symbols: | NAD(P)-linked oxidoreductase superfamily protein | chr5:21765215-21766919 REVERSE LENGTH=365	1	7	7	7	3	5	5	6	3	6	7	4	3	5	5	6	3	6	7	4	3	5	5	6	3	6	7	4	25.5	25.5	25.5	40.576	365	365	1	48	0	55.634	By MS/MS	By MS/MS	By MS/MS	By MS/MS	By MS/MS	By MS/MS
AT5G55230.1;AT5G55230.2;AT4G26760.1	AT5G55230.1;AT5G55230.2	4;4;1	4;4;1	4;4;1	>AT5G55230.1 | Symbols: ATMAP65-1, MAP65-1 | microtubule-associated proteins 65-1 | chr5:22402716-22405182 FORWARD LENGTH=587;>AT5G55230.2 | Symbols: MAP65-1 | microtubule-associated proteins 65-1 | chr5:22402716-22405182 FORWARD LENGTH=616	3	4	4	4	0	3	2	2	2	4	3	3	0	3	2	2	2	4	3	3	0	3	2	2	2	4	3	3	9.5	9.5	9.5	65.784	587	587;616;578	1	19	0	28.971	By matching	By matching	By matching	By matching	By MS/MS	By MS/MS
AT5G55670.2;AT5G55670.1	AT5G55670.2;AT5G55670.1	3;3	3;3	3;3	>AT5G55670.2 | Symbols: | RNA-binding (RRM/RBD/RNP motifs) family protein | chr5:22544669-22546801 REVERSE LENGTH=585;>AT5G55670.1 | Symbols: | RNA-binding (RRM/RBD/RNP motifs) family protein | chr5:22544669-22546801 REVERSE LENGTH=710	2	3	3	3	0	1	3	3	1	3	3	3	0	1	3	3	1	3	3	3	0	1	3	3	1	3	3	3	7.2	7.2	7.2	64.024	585	585;710	1	17	0	19.144	By matching	By matching	By matching	By MS/MS	By matching	By MS/MS
AT5G57870.1;AT5G57870.2	AT5G57870.1;AT5G57870.2	6;5	6;5	6;5	>AT5G57870.1 | Symbols: eIFiso4G1 | MIF4G domain-containing protein / MA3 domain-containing protein | chr5:23439755-23443433 FORWARD LENGTH=780;>AT5G57870.2 | Symbols: eIFiso4G1 | MIF4G domain-containing protein / MA3 domain-containing protein | chr5:23439	2	6	6	6	0	2	4	3	2	4	5	5	0	2	4	3	2	4	5	5	0	2	4	3	2	4	5	5	11.4	11.4	11.4	85.571	780	780;776	1	27	0	39.205	By matching	By matching	By MS/MS	By MS/MS	By matching	By MS/MS
AT5G58250.1	AT5G58250.1	2	2	2	>AT5G58250.1 | Symbols: | unknown protein; FUNCTIONS IN: molecular_function unknown; INVOLVED IN: biological_process unknown; LOCATED IN: thylakoid, chloroplast; EXPRESSED IN: 22 plant structures; EXPRESSED DURING: 14 growth stages; CONTAINS InterPro DOMA	1	2	2	2	1	2	2	1	1	2	2	1	1	2	2	1	1	2	2	1	1	2	2	1	1	2	2	1	17.5	17.5	17.5	24.104	211	211	1	12	0	48.494	By matching	By matching	By matching	By matching	By matching	By MS/MS
AT5G59950.4;AT5G59950.1;AT5G59950.5;AT5G59950.2;AT5G59950.3	AT5G59950.4;AT5G59950.1;AT5G59950.5;AT5G59950.2;AT5G59950.3	6;6;6;5;5	5;5;5;4;4	5;5;5;4;4	>AT5G59950.4 | Symbols: | RNA-binding (RRM/RBD/RNP motifs) family protein | chr5:24140235-24141410 FORWARD LENGTH=211;>AT5G59950.1 | Symbols: | RNA-binding (RRM/RBD/RNP motifs) family protein | chr5:24140235-24141504 FORWARD LENGTH=244;>AT5G59950.5 | Sym	5	6	5	5	1	1	4	4	2	4	5	5	0	1	3	4	1	3	4	4	0	1	3	4	1	3	4	4	29.4	25.1	25.1	23.579	211	211;244;245;178;242	1	20	0	36.693	By matching	By MS/MS	By MS/MS	By MS/MS	By MS/MS	By MS/MS
AT5G60980.1;AT5G60980.2	AT5G60980.1;AT5G60980.2	2;2	2;2	2;2	>AT5G60980.1 | Symbols: | Nuclear transport factor 2 (NTF2) family protein with RNA binding (RRM-RBD-RNP motifs) domain | chr5:24543988-24546027 FORWARD LENGTH=459;>AT5G60980.2 | Symbols: | Nuclear transport factor 2 (NTF2) family protein with RNA bindin	2	2	2	2	0	2	2	2	1	2	2	2	0	2	2	2	1	2	2	2	0	2	2	2	1	2	2	2	6.5	6.5	6.5	49.415	459	459;460	1	13	0	22.859	By matching	By MS/MS	By MS/MS	By matching	By MS/MS	By MS/MS
AT5G61780.1;AT5G07350.1;AT5G07350.2	AT5G61780.1;AT5G07350.1;AT5G07350.2	6;3;3	6;3;3	6;3;3	>AT5G61780.1 | Symbols: Tudor2, AtTudor2, TSN2 | TUDOR-SN protein 2 | chr5:24822012-24826641 FORWARD LENGTH=985;>AT5G07350.1 | Symbols: Tudor1, AtTudor1, TSN1 | TUDOR-SN protein 1 | chr5:2320344-2324892 REVERSE LENGTH=991;>AT5G07350.2 | Symbols: Tudor1, At	3	6	6	6	0	1	2	2	1	3	4	5	0	1	2	2	1	3	4	5	0	1	2	2	1	3	4	5	7	7	7	107.74	985	985;991;1007	1	18	0	34.326	By matching	By matching	By matching	By matching	By matching	By MS/MS
AT5G62350.1	AT5G62350.1	6	6	6	>AT5G62350.1 | Symbols: | Plant invertase/pectin methylesterase inhibitor superfamily protein | chr5:25037504-25038112 FORWARD LENGTH=202	1	6	6	6	3	6	6	6	5	6	6	6	3	6	6	6	5	6	6	6	3	6	6	6	5	6	6	6	42.6	42.6	42.6	22.179	202	202	1	74	0	252.34	By MS/MS	By MS/MS	By MS/MS	By MS/MS	By MS/MS	By MS/MS
AT5G63140.1	AT5G63140.1	2	2	2	>AT5G63140.1 | Symbols: ATPAP29, PAP29 | purple acid phosphatase 29 | chr5:25328237-25329616 FORWARD LENGTH=389	1	2	2	2	1	2	2	2	2	2	2	2	1	2	2	2	2	2	2	2	1	2	2	2	2	2	2	2	5.7	5.7	5.7	43.547	389	389	1	15	0	15.497	By matching	By MS/MS	By MS/MS	By MS/MS	By MS/MS	By MS/MS
AT5G63400.1;AT5G63400.2	AT5G63400.1	4;1	4;1	4;1	>AT5G63400.1 | Symbols: ADK1 | adenylate kinase 1 | chr5:25393274-25394817 REVERSE LENGTH=246	2	4	4	4	0	2	4	3	3	3	4	3	0	2	4	3	3	3	4	3	0	2	4	3	3	3	4	3	23.2	23.2	23.2	26.932	246	246;190	1	22	0	30.128	By matching	By matching	By MS/MS	By matching	By MS/MS	By MS/MS
AT5G63420.1	AT5G63420.1	2	2	2	>AT5G63420.1 | Symbols: emb2746 | RNA-metabolising metallo-beta-lactamase family protein | chr5:25400515-25405807 FORWARD LENGTH=911	1	2	2	2	0	2	2	1	1	2	2	2	0	2	2	1	1	2	2	2	0	2	2	1	1	2	2	2	3.2	3.2	3.2	100.55	911	911	1	12	0	14.038	By matching	By matching	By matching	By matching	By matching	By MS/MS
AT5G63800.1	AT5G63800.1	4	4	4	>AT5G63800.1 | Symbols: MUM2, BGAL6 | Glycosyl hydrolase family 35 protein | chr5:25530323-25535678 FORWARD LENGTH=718	1	4	4	4	1	1	1	3	1	3	3	4	1	1	1	3	1	3	3	4	1	1	1	3	1	3	3	4	8.1	8.1	8.1	79.758	718	718	1	17	0	23.754	By matching	By matching	By matching	By MS/MS	By matching	By MS/MS
AT5G64040.1;AT5G64040.2	AT5G64040.1	8;3	8;3	8;3	>AT5G64040.1 | Symbols: PSAN | photosystem I reaction center subunit PSI-N, chloroplast, putative / PSI-N, putative (PSAN) | chr5:25628724-25629409 REVERSE LENGTH=171	2	8	8	8	0	6	7	6	7	8	8	7	0	6	7	6	7	8	8	7	0	6	7	6	7	8	8	7	34.5	34.5	34.5	18.429	171	171;181	1	55	0	259.13	By matching	By MS/MS	By MS/MS	By MS/MS	By MS/MS	By MS/MS
AT5G64260.1	AT5G64260.1	3	2	2	>AT5G64260.1 | Symbols: EXL2 | EXORDIUM like 2 | chr5:25703980-25704897 FORWARD LENGTH=305	1	3	2	2	3	3	3	3	3	3	3	3	2	2	2	2	2	2	2	2	2	2	2	2	2	2	2	2	13.1	9.5	9.5	32.674	305	305	1	17	0	28.001	By matching	By MS/MS	By MS/MS	By MS/MS	By MS/MS	By MS/MS
AT5G64270.1	AT5G64270.1	7	7	7	>AT5G64270.1 | Symbols: | splicing factor, putative | chr5:25706909-25710718 FORWARD LENGTH=1269	1	7	7	7	0	4	6	6	4	6	7	7	0	4	6	6	4	6	7	7	0	4	6	6	4	6	7	7	7.6	7.6	7.6	141.45	1269	1269	1	49	0	51.129	By matching	By matching	By MS/MS	By MS/MS	By MS/MS	By MS/MS
AT5G65410.1	AT5G65410.1	2	2	2	>AT5G65410.1 | Symbols: ATHB25, ZFHD2, HB25, ZHD1 | homeobox protein 25 | chr5:26136179-26137018 FORWARD LENGTH=279	1	2	2	2	0	0	1	1	0	1	2	2	0	0	1	1	0	1	2	2	0	0	1	1	0	1	2	2	6.1	6.1	6.1	31.098	279	279	1	7	0	11.6	By matching	By matching	By matching	By MS/MS	By matching	By matching
AT5G66190.1;AT5G66190.2	AT5G66190.1;AT5G66190.2	11;9	11;9	10;8	>AT5G66190.1 | Symbols: ATLFNR1, FNR1 | ferredoxin-NADP(+)-oxidoreductase 1 | chr5:26451203-26453012 REVERSE LENGTH=360;>AT5G66190.2 | Symbols: ATLFNR1 | ferredoxin-NADP(+)-oxidoreductase 1 | chr5:26451203-26452616 REVERSE LENGTH=262	2	11	11	10	3	8	10	5	10	11	9	9	3	8	10	5	10	11	9	9	3	7	9	5	9	10	8	8	40.6	40.6	37.5	40.326	360	360;262	1	82	0	153.49	By MS/MS	By MS/MS	By MS/MS	By MS/MS	By MS/MS	By MS/MS
AT5G66680.1	AT5G66680.1	5	5	5	>AT5G66680.1 | Symbols: DGL1 | dolichyl-diphosphooligosaccharide-protein glycosyltransferase 48kDa subunit family protein | chr5:26617840-26620581 REVERSE LENGTH=437	1	5	5	5	0	4	4	5	2	5	5	5	0	4	4	5	2	5	5	5	0	4	4	5	2	5	5	5	15.6	15.6	15.6	48.744	437	437	1	30	0	31.313	By matching	By matching	By matching	By MS/MS	By MS/MS	By MS/MS
ATCG00020.1	ATCG00020.1	2	2	2	>ATCG00020.1 | Symbols: PSBA | photosystem II reaction center protein A | chrC:383-1444 REVERSE LENGTH=353	1	2	2	2	0	1	2	2	1	1	2	2	0	1	2	2	1	1	2	2	0	1	2	2	1	1	2	2	6.8	6.8	6.8	38.936	353	353	1	11	0	42.902	By matching	By MS/MS	By MS/MS	By MS/MS	By MS/MS	By MS/MS
ATCG00120.1	ATCG00120.1	8	8	8	>ATCG00120.1 | Symbols: ATPA | ATP synthase subunit alpha | chrC:9938-11461 REVERSE LENGTH=507	1	8	8	8	0	7	8	8	7	8	8	8	0	7	8	8	7	8	8	8	0	7	8	8	7	8	8	8	18.3	18.3	18.3	55.328	507	507	1	54	0	94.916	By matching	By matching	By MS/MS	By MS/MS	By MS/MS	By MS/MS
ATCG00130.1	ATCG00130.1	2	2	2	>ATCG00130.1 | Symbols: ATPF | ATPase, F0 complex, subunit B/B, bacterial/chloroplast | chrC:11529-12798 REVERSE LENGTH=184	1	2	2	2	0	2	2	2	1	2	2	1	0	2	2	2	1	2	2	1	0	2	2	2	1	2	2	1	14.7	14.7	14.7	21.057	184	184	1	12	0	12.444	By matching	By matching	By MS/MS	By MS/MS	By matching	By matching
ATCG00270.1	ATCG00270.1	3	3	3	>ATCG00270.1 | Symbols: PSBD | photosystem II reaction center protein D | chrC:32711-33772 FORWARD LENGTH=353	1	3	3	3	0	3	3	2	3	3	3	3	0	3	3	2	3	3	3	3	0	3	3	2	3	3	3	3	9.1	9.1	9.1	39.547	353	353	1	20	0	18.939	By matching	By MS/MS	By MS/MS	By MS/MS	By MS/MS	By MS/MS
ATCG00280.1	ATCG00280.1	2	2	2	>ATCG00280.1 | Symbols: PSBC | photosystem II reaction center protein C | chrC:33720-35141 FORWARD LENGTH=473	1	2	2	2	0	2	2	2	2	2	2	2	0	2	2	2	2	2	2	2	0	2	2	2	2	2	2	2	4.7	4.7	4.7	51.867	473	473	1	20	0	14.607	By matching	By matching	By MS/MS	By MS/MS	By matching	By MS/MS
ATCG00350.1	ATCG00350.1	2	2	2	>ATCG00350.1 | Symbols: PSAA | Photosystem I, PsaA/PsaB protein | chrC:39605-41857 REVERSE LENGTH=750	1	2	2	2	1	1	1	1	2	2	2	2	1	1	1	1	2	2	2	2	1	1	1	1	2	2	2	2	2.7	2.7	2.7	83.23	750	750	1	12	0	13.36	By matching	By matching	By matching	By matching	By MS/MS	By MS/MS
ATCG00470.1	ATCG00470.1	2	2	2	>ATCG00470.1 | Symbols: ATPE | ATP synthase epsilon chain | chrC:52265-52663 REVERSE LENGTH=132	1	2	2	2	0	2	2	1	1	1	1	1	0	2	2	1	1	1	1	1	0	2	2	1	1	1	1	1	27.3	27.3	27.3	14.499	132	132	1	9	0	19.297	By matching	By MS/MS	By MS/MS	By MS/MS	By MS/MS	By matching
ATCG00480.1	ATCG00480.1	15	15	14	>ATCG00480.1 | Symbols: ATPB, PB | ATP synthase subunit beta | chrC:52660-54156 REVERSE LENGTH=498	1	15	15	14	3	12	12	11	10	12	12	9	3	12	12	11	10	12	12	9	2	11	11	10	9	11	11	8	40.8	40.8	38.6	53.933	498	498	1	85	0	121.74	By matching	By MS/MS	By MS/MS	By MS/MS	By MS/MS	By MS/MS
ATCG00490.1	ATCG00490.1	13	13	13	>ATCG00490.1 | Symbols: RBCL | ribulose-bisphosphate carboxylases | chrC:54958-56397 FORWARD LENGTH=479	1	13	13	13	2	10	11	6	7	10	10	11	2	10	11	6	7	10	10	11	2	10	11	6	7	10	10	11	31.5	31.5	31.5	52.954	479	479	1	80	0	109.87	By matching	By MS/MS	By MS/MS	By MS/MS	By MS/MS	By MS/MS
ATCG00540.1	ATCG00540.1	5	5	5	>ATCG00540.1 | Symbols: PETA | photosynthetic electron transfer A | chrC:61657-62619 FORWARD LENGTH=320	1	5	5	5	1	4	4	4	3	5	5	5	1	4	4	4	3	5	5	5	1	4	4	4	3	5	5	5	20.6	20.6	20.6	35.356	320	320	1	31	0	34.141	By MS/MS	By MS/MS	By MS/MS	By MS/MS	By MS/MS	By MS/MS
ATCG00680.1	ATCG00680.1	2	2	2	>ATCG00680.1 | Symbols: PSBB | photosystem II reaction center protein B | chrC:72371-73897 FORWARD LENGTH=508	1	2	2	2	0	1	2	2	1	1	2	2	0	1	2	2	1	1	2	2	0	1	2	2	1	1	2	2	4.7	4.7	4.7	56.036	508	508	1	11	0	12.703	By matching	By MS/MS	By MS/MS	By matching	By matching	By MS/MS
ATCG00800.1	ATCG00800.1	2	2	2	>ATCG00800.1 | Symbols: | structural constituent of ribosome | chrC:82826-83482 REVERSE LENGTH=218	1	2	2	2	0	0	2	2	0	1	2	2	0	0	2	2	0	1	2	2	0	0	2	2	0	1	2	2	9.2	9.2	9.2	25.188	218	218	1	9	0	15.16	By matching	By matching	By MS/MS	By MS/MS	By matching	By matching
[truncated: 84 more columns]

## Sheet: His6-Myc-Csy4
Protein.IDs	Majority.protein.IDs	Peptide.counts..all.	Peptide.counts..razor.unique.	Peptide.counts..unique.	Fasta.headers	Number.of.proteins	Peptides	Razor...unique.peptides	Unique.peptides	Peptides.minus_1	Peptides.minus_2	Peptides.minus_3	Peptides.minus_4	Peptides.plus_1	Peptides.plus_2	Peptides.plus_3	Peptides.plus_4	Razor...unique.peptides.minus_1	Razor...unique.peptides.minus_2	Razor...unique.peptides.minus_3	Razor...unique.peptides.minus_4	Razor...unique.peptides.plus_1	Razor...unique.peptides.plus_2	Razor...unique.peptides.plus_3	Razor...unique.peptides.plus_4	Unique.peptides.minus_1	Unique.peptides.minus_2	Unique.peptides.minus_3	Unique.peptides.minus_4	Unique.peptides.plus_1	Unique.peptides.plus_2	Unique.peptides.plus_3	Unique.peptides.plus_4	Sequence.coverage....	Unique...razor.sequence.coverage....	Unique.sequence.coverage....	Mol..weight..kDa.	Sequence.length	Sequence.lengths	Fraction.average	Fraction.1	Q.value	Score	Identification.type.minus_1	Identification.type.minus_2	Identification.type.minus_3	Identification.type.minus_4	Identification.type.plus_1	Identification.type.plus_2
AT1G01080.1;AT1G01080.2	AT1G01080.1;AT1G01080.2	7;7	7;7	7;7	>AT1G01080.1 | Symbols: | RNA-binding (RRM/RBD/RNP motifs) family protein | chr1:45503-46789 REVERSE LENGTH=293;>AT1G01080.2 | Symbols: | RNA-binding (RRM/RBD/RNP motifs) family protein | chr1:45503-46789 REVERSE LENGTH=294	2	7	7	7	3	2	3	3	6	6	6	7	3	2	3	3	6	6	6	7	3	2	3	3	6	6	6	7	24.2	24.2	24.2	32.575	293	293;294	1	36	0	43.668	By matching	By matching	By matching	By MS/MS	By MS/MS	By MS/MS
AT1G01320.2;AT1G01320.1	AT1G01320.2;AT1G01320.1	16;16	16;16	10;10	>AT1G01320.2 | Symbols: | Tetratricopeptide repeat (TPR)-like superfamily protein | chr1:121582-130099 REVERSE LENGTH=1787;>AT1G01320.1 | Symbols: | Tetratricopeptide repeat (TPR)-like superfamily protein | chr1:121582-130099 REVERSE LENGTH=1797	2	16	16	10	13	8	15	12	11	12	12	13	13	8	15	12	11	12	12	13	7	4	9	7	6	7	7	8	10.4	10.4	6.4	197.5	1787	1787;1797	1	107	0	133.04	By MS/MS	By MS/MS	By MS/MS	By MS/MS	By MS/MS	By MS/MS
AT1G02150.1	AT1G02150.1	3	3	3	>AT1G02150.1 | Symbols: | Tetratricopeptide repeat (TPR)-like superfamily protein | chr1:408779-410433 FORWARD LENGTH=524	1	3	3	3	3	1	2	2	3	2	2	1	3	1	2	2	3	2	2	1	3	1	2	2	3	2	2	1	6.7	6.7	6.7	59.882	524	524	1	16	0	17.496	By MS/MS	By matching	By matching	By matching	By MS/MS	By matching
AT1G02280.2;AT1G02280.1	AT1G02280.2;AT1G02280.1	3;3	3;3	3;3	>AT1G02280.2 | Symbols: TOC33, ATTOC33, PPI1 | translocon at the outer envelope membrane of chloroplasts 33 | chr1:448665-450246 REVERSE LENGTH=297;>AT1G02280.1 | Symbols: TOC33, ATTOC33, PPI1 | translocon at the outer envelope membrane of chloroplasts 33	2	3	3	3	3	2	2	3	3	3	3	3	3	2	2	3	3	3	3	3	3	2	2	3	3	3	3	3	13.8	13.8	13.8	32.925	297	297;297	1	22	0	19.763	By MS/MS	By MS/MS	By MS/MS	By MS/MS	By MS/MS	By MS/MS
AT1G02840.2;AT1G02840.3;AT1G02840.1;AT4G02430.1;AT4G02430.2	AT1G02840.2;AT1G02840.3;AT1G02840.1	7;7;7;2;2	7;7;7;2;2	6;6;6;2;2	>AT1G02840.2 | Symbols: SR1, ATSRP34, SRP34, SR34, At-SR34 | RNA-binding (RRM/RBD/RNP motifs) family protein | chr1:626918-628995 FORWARD LENGTH=285;>AT1G02840.3 | Symbols: SR1, ATSRP34, SRP34, SR34, At-SR34 | RNA-binding (RRM/RBD/RNP motifs) family protei	5	7	7	6	6	5	6	5	6	6	6	6	6	5	6	5	6	6	6	6	5	4	5	4	5	5	5	5	28.1	28.1	25.3	31.967	285	285;303;303;178;278	1	56	0	51.713	By MS/MS	By MS/MS	By MS/MS	By MS/MS	By MS/MS	By MS/MS
AT1G03220.1	AT1G03220.1	6	2	2	>AT1G03220.1 | Symbols: | Eukaryotic aspartyl protease family protein | chr1:787143-788444 FORWARD LENGTH=433	1	6	2	2	4	2	5	4	2	2	2	3	2	0	2	1	0	0	0	0	2	0	2	1	0	0	0	0	18.2	6.7	6.7	45.717	433	433	1	5	0	24.568	By matching	By matching	By MS/MS	By matching	By matching	By matching
AT1G03230.1	AT1G03230.1	15	15	11	>AT1G03230.1 | Symbols: | Eukaryotic aspartyl protease family protein | chr1:790110-791414 FORWARD LENGTH=434	1	15	15	11	12	11	14	12	11	9	9	13	12	11	14	12	11	9	9	13	10	9	11	9	9	7	7	10	43.8	43.8	32.3	46.148	434	434	1	113	0	297.89	By MS/MS	By MS/MS	By MS/MS	By MS/MS	By MS/MS	By MS/MS
AT1G03630.2;AT1G03630.1	AT1G03630.2;AT1G03630.1	6;6	4;4	4;4	>AT1G03630.2 | Symbols: POR C, PORC | protochlorophyllide oxidoreductase C | chr1:907699-909245 FORWARD LENGTH=399;>AT1G03630.1 | Symbols: POR C, PORC | protochlorophyllide oxidoreductase C | chr1:907699-909245 FORWARD LENGTH=401	2	6	4	4	6	6	6	5	6	4	5	5	4	4	4	4	4	4	4	4	4	4	4	4	4	4	4	4	14.3	10.5	10.5	43.625	399	399;401	1	45	0	54.786	By MS/MS	By MS/MS	By MS/MS	By MS/MS	By MS/MS	By MS/MS
AT1G04170.1;AT4G18330.2;AT4G18330.1;AT2G18720.1	AT1G04170.1	17;5;4;1	17;5;4;1	17;5;4;1	>AT1G04170.1 | Symbols: EIF2 GAMMA | eukaryotic translation initiation factor 2 gamma subunit | chr1:1097423-1099702 FORWARD LENGTH=465	4	17	17	17	16	13	15	15	16	16	16	17	16	13	15	15	16	16	16	17	16	13	15	15	16	16	16	17	39.8	39.8	39.8	50.853	465	465;471;284;470	1	184	0	244.58	By MS/MS	By MS/MS	By MS/MS	By MS/MS	By MS/MS	By MS/MS
AT1G04190.1	AT1G04190.1	4	4	4	>AT1G04190.1 | Symbols: TPR3 | Tetratricopeptide repeat (TPR)-like superfamily protein | chr1:1106617-1108557 REVERSE LENGTH=328	1	4	4	4	2	1	4	2	3	3	3	2	2	1	4	2	3	3	3	2	2	1	4	2	3	3	3	2	15.2	15.2	15.2	37.18	328	328	1	20	0	22.61	By matching	By matching	By MS/MS	By matching	By matching	By matching
AT1G04510.2;AT1G04510.1	AT1G04510.2;AT1G04510.1	5;5	5;5	4;4	>AT1G04510.2 | Symbols: MAC3A | MOS4-associated complex 3A | chr1:1226749-1230592 FORWARD LENGTH=523;>AT1G04510.1 | Symbols: MAC3A | MOS4-associated complex 3A | chr1:1226749-1230592 FORWARD LENGTH=523	2	5	5	4	2	3	4	4	1	4	3	3	2	3	4	4	1	4	3	3	1	2	3	3	0	3	2	2	10.1	10.1	8	56.881	523	523;523	1	28	0	30.049	By MS/MS	By MS/MS	By MS/MS	By MS/MS	By MS/MS	By MS/MS
AT1G04980.1	AT1G04980.1	5	5	5	>AT1G04980.1 | Symbols: ATPDIL2-2, ATPDI10, PDI10, PDIL2-2 | PDI-like 2-2 | chr1:1413869-1416120 REVERSE LENGTH=447	1	5	5	5	4	2	4	5	5	4	4	5	4	2	4	5	5	4	4	5	4	2	4	5	5	4	4	5	14.5	14.5	14.5	48.403	447	447	1	37	0	30.594	By MS/MS	By matching	By MS/MS	By MS/MS	By MS/MS	By MS/MS
AT1G05190.1	AT1G05190.1	10	10	10	>AT1G05190.1 | Symbols: emb2394 | Ribosomal protein L6 family | chr1:1502515-1503738 REVERSE LENGTH=223	1	10	10	10	10	8	8	9	10	8	8	9	10	8	8	9	10	8	8	9	10	8	8	9	10	8	8	9	47.5	47.5	47.5	24.705	223	223	1	86	0	61.989	By MS/MS	By MS/MS	By MS/MS	By MS/MS	By MS/MS	By MS/MS
AT1G06220.2;AT1G06220.1	AT1G06220.2;AT1G06220.1	12;12	12;12	4;4	>AT1G06220.2 | Symbols: MEE5 | Ribosomal protein S5/Elongation factor G/III/V family protein | chr1:1900524-1904583 FORWARD LENGTH=987;>AT1G06220.1 | Symbols: MEE5, CLO, GFA1 | Ribosomal protein S5/Elongation factor G/III/V family protein | chr1:1900524-19	2	12	12	4	9	6	8	9	11	10	10	12	9	6	8	9	11	10	10	12	4	2	4	3	4	4	4	4	14.5	14.5	5.6	110.44	987	987;987	1	78	0	77.232	By matching	By MS/MS	By matching	By MS/MS	By MS/MS	By MS/MS
AT1G06760.1	AT1G06760.1	2	2	1	>AT1G06760.1 | Symbols: | winged-helix DNA-binding transcription factor family protein | chr1:2076687-2077616 REVERSE LENGTH=274	1	2	2	1	2	1	2	2	2	2	2	2	2	1	2	2	2	2	2	2	1	0	1	1	1	1	1	1	8.4	8.4	4.7	28.946	274	274	1	15	0	13.555	By MS/MS	By matching	By MS/MS	By MS/MS	By MS/MS	By MS/MS
AT1G06950.1	AT1G06950.1	8	8	8	>AT1G06950.1 | Symbols: ATTIC110, TIC110 | translocon at the inner envelope membrane of chloroplasts 110 | chr1:2130303-2135563 REVERSE LENGTH=1016	1	8	8	8	8	6	8	8	5	6	7	7	8	6	8	8	5	6	7	7	8	6	8	8	5	6	7	7	9.5	9.5	9.5	112.12	1016	1016	1	55	0	50.04	By MS/MS	By matching	By MS/MS	By MS/MS	By MS/MS	By matching
AT1G07320.4;AT1G07320.3;AT1G07320.2;AT1G07320.1	AT1G07320.4;AT1G07320.3;AT1G07320.2;AT1G07320.1	5;5;5;5	5;5;5;5	5;5;5;5	>AT1G07320.4 | Symbols: RPL4 | ribosomal protein L4 | chr1:2249190-2250173 FORWARD LENGTH=278;>AT1G07320.3 | Symbols: RPL4 | ribosomal protein L4 | chr1:2249190-2250026 FORWARD LENGTH=278;>AT1G07320.2 | Symbols: RPL4 | ribosomal protein L4 | chr1:2249190-2	4	5	5	5	4	5	5	5	4	4	4	4	4	5	5	5	4	4	4	4	4	5	5	5	4	4	4	4	20.5	20.5	20.5	30.142	278	278;278;280;282	1	41	0	40.123	By MS/MS	By MS/MS	By MS/MS	By MS/MS	By MS/MS	By MS/MS
AT5G59970.1;AT5G59690.1;AT3G53730.1;AT3G46320.1;AT3G45930.1;AT2G28740.1;AT1G07820.2;AT1G07820.1;AT1G07660.1;AT1G07660.2	AT5G59970.1;AT5G59690.1;AT3G53730.1;AT3G46320.1;AT3G45930.1;AT2G28740.1;AT1G07820.2;AT1G07820.1;AT1G07660.1;AT1G07660.2	6;6;6;6;6;6;6;6;6;5	6;6;6;6;6;6;6;6;6;5	6;6;6;6;6;6;6;6;6;5	>AT5G59970.1 | Symbols: | Histone superfamily protein | chr5:24146352-24146663 REVERSE LENGTH=103;>AT5G59690.1 | Symbols: | Histone superfamily protein | chr5:24051649-24051960 FORWARD LENGTH=103;>AT3G53730.1 | Symbols: | Histone superfamily protein | c	10	6	6	6	4	6	4	4	2	2	2	4	4	6	4	4	2	2	2	4	4	6	4	4	2	2	2	4	44.7	44.7	44.7	11.409	103	103;103;103;103;103;103;103;103;103;86	1	57	0	151.85	By MS/MS	By MS/MS	By MS/MS	By MS/MS	By MS/MS	By MS/MS
AT5G60390.3;AT5G60390.1;AT1G07940.2;AT1G07940.1;AT1G07930.1;AT1G07920.1;AT1G07930.2;AT5G60390.2;AT1G35550.1	AT5G60390.3;AT5G60390.1;AT1G07940.2;AT1G07940.1;AT1G07930.1;AT1G07920.1;AT1G07930.2;AT5G60390.2	39;39;39;39;39;39;33;32;1	39;39;39;39;39;39;33;32;1	39;39;39;39;39;39;33;32;1	>AT5G60390.3 | Symbols: | GTP binding Elongation factor Tu family protein | chr5:24289226-24290675 FORWARD LENGTH=449;>AT5G60390.1 | Symbols: | GTP binding Elongation factor Tu family protein | chr5:24289226-24290675 FORWARD LENGTH=449;>AT1G07940.2 | Sym	9	39	39	39	37	36	38	36	36	38	37	38	37	36	38	36	36	38	37	38	37	36	38	36	36	38	37	38	70.2	70.2	70.2	49.502	449	449;449;449;449;449;449;372;400;104	1	1356	0	323.31	By MS/MS	By MS/MS	By MS/MS	By MS/MS	By MS/MS	By MS/MS
AT1G08450.2;AT1G08450.3;AT1G08450.1	AT1G08450.2;AT1G08450.3;AT1G08450.1	4;4;4	4;4;4	4;4;4	>AT1G08450.2 | Symbols: CRT3, PSL1, EBS2, AtCRT3 | calreticulin 3 | chr1:2668008-2671800 REVERSE LENGTH=370;>AT1G08450.3 | Symbols: CRT3 | calreticulin 3 | chr1:2668008-2671800 REVERSE LENGTH=399;>AT1G08450.1 | Symbols: CRT3, PSL1, EBS2, AtCRT3 | calreticu	3	4	4	4	3	3	4	4	3	4	3	4	3	3	4	4	3	4	3	4	3	3	4	4	3	4	3	4	11.6	11.6	11.6	43.594	370	370;399;424	1	33	0	24.505	By MS/MS	By matching	By MS/MS	By MS/MS	By MS/MS	By MS/MS
AT1G08520.1	AT1G08520.1	11	11	11	>AT1G08520.1 | Symbols: ALB1, ALB-1V, V157, PDE166, CHLD | ALBINA 1 | chr1:2696538-2700819 FORWARD LENGTH=760	1	11	11	11	9	7	11	8	6	5	5	6	9	7	11	8	6	5	5	6	9	7	11	8	6	5	5	6	17.8	17.8	17.8	83.283	760	760	1	57	0	75.925	By MS/MS	By MS/MS	By MS/MS	By MS/MS	By MS/MS	By MS/MS
AT1G09150.1	AT1G09150.1	2	2	2	>AT1G09150.1 | Symbols: | pseudouridine synthase and archaeosine transglycosylase (PUA) domain-containing protein | chr1:2946599-2948908 FORWARD LENGTH=181	1	2	2	2	1	0	2	1	2	2	2	2	1	0	2	1	2	2	2	2	1	0	2	1	2	2	2	2	11	11	11	20.457	181	181	1	12	0.0012821	11.265	By matching	By matching	By MS/MS	By matching	By matching	By matching
AT1G09340.1	AT1G09340.1	21	21	21	>AT1G09340.1 | Symbols: CRB, CSP41B, HIP1.3 | chloroplast RNA binding | chr1:3015473-3018035 FORWARD LENGTH=378	1	21	21	21	19	19	18	20	19	19	20	21	19	19	18	20	19	19	20	21	19	19	18	20	19	19	20	21	55.8	55.8	55.8	42.619	378	378	1	267	0	323.31	By MS/MS	By MS/MS	By MS/MS	By MS/MS	By MS/MS	By MS/MS
AT1G09560.1	AT1G09560.1	2	2	1	>AT1G09560.1 | Symbols: GLP5 | germin-like protein 5 | chr1:3093896-3094639 FORWARD LENGTH=219	1	2	2	1	2	2	2	2	2	2	2	2	2	2	2	2	2	2	2	2	1	1	1	1	1	1	1	1	15.1	15.1	7.8	22.868	219	219	1	17	0	20.3	By MS/MS	By MS/MS	By MS/MS	By MS/MS	By MS/MS	By MS/MS
AT1G09640.1;AT1G09640.2	AT1G09640.1;AT1G09640.2	8;6	8;6	5;4	>AT1G09640.1 | Symbols: | Translation elongation factor EF1B, gamma chain | chr1:3120162-3122152 FORWARD LENGTH=414;>AT1G09640.2 | Symbols: | Translation elongation factor EF1B, gamma chain | chr1:3120162-3122152 FORWARD LENGTH=265	2	8	8	5	7	7	8	8	4	5	6	6	7	7	8	8	4	5	6	6	4	4	5	5	2	3	4	3	17.4	17.4	11.4	46.66	414	414;265	1	63	0	67.644	By MS/MS	By MS/MS	By MS/MS	By MS/MS	By MS/MS	By MS/MS
AT1G09760.1	AT1G09760.1	10	10	10	>AT1G09760.1 | Symbols: U2A | U2 small nuclear ribonucleoprotein A | chr1:3159476-3161603 REVERSE LENGTH=249	1	10	10	10	8	8	7	9	9	9	9	9	8	8	7	9	9	9	9	9	8	8	7	9	9	9	9	9	39.8	39.8	39.8	28.041	249	249	1	68	0	69.337	By MS/MS	By MS/MS	By MS/MS	By MS/MS	By MS/MS	By MS/MS
AT1G10580.1	AT1G10580.1	3	3	3	>AT1G10580.1 | Symbols: | Transducin/WD40 repeat-like superfamily protein | chr1:3491560-3493665 REVERSE LENGTH=573	1	3	3	3	1	1	2	1	1	3	2	3	1	1	2	1	1	3	2	3	1	1	2	1	1	3	2	3	8.2	8.2	8.2	65.127	573	573	1	14	0	27.084	By MS/MS	By matching	By matching	By MS/MS	By matching	By MS/MS
AT3G62290.3;AT3G62290.2;AT3G62290.1;AT2G47170.1;AT1G70490.3;AT1G70490.2;AT1G70490.1;AT1G23490.1;AT1G10630.1;AT5G14670.1	AT3G62290.3;AT3G62290.2;AT3G62290.1;AT2G47170.1;AT1G70490.3;AT1G70490.2;AT1G70490.1;AT1G23490.1;AT1G10630.1;AT5G14670.1	5;5;5;5;5;5;5;5;5;5	5;5;5;5;5;5;5;5;5;5	5;5;5;5;5;5;5;5;5;5	>AT3G62290.3 | Symbols: ARFA1E | ADP-ribosylation factor A1E | chr3:23052287-23053545 FORWARD LENGTH=181;>AT3G62290.2 | Symbols: ARFA1E | ADP-ribosylation factor A1E | chr3:23052287-23053545 FORWARD LENGTH=181;>AT3G62290.1 | Symbols: ATARFA1E, ARFA1E | ADP	10	5	5	5	4	4	3	5	4	4	3	3	4	4	3	5	4	4	3	3	4	4	3	5	4	4	3	3	32	32	32	20.607	181	181;181;181;181;181;181;181;181;181;188	1	33	0	30.987	By MS/MS	By MS/MS	By MS/MS	By MS/MS	By MS/MS	By MS/MS
AT1G10840.2;AT1G10840.1	AT1G10840.2;AT1G10840.1	4;4	4;4	4;4	>AT1G10840.2 | Symbols: TIF3H1 | translation initiation factor 3 subunit H1 | chr1:3607885-3609657 REVERSE LENGTH=250;>AT1G10840.1 | Symbols: TIF3H1 | translation initiation factor 3 subunit H1 | chr1:3607885-3610299 REVERSE LENGTH=337	2	4	4	4	4	1	3	2	0	2	2	1	4	1	3	2	0	2	2	1	4	1	3	2	0	2	2	1	16	16	16	28.887	250	250;337	1	15	0	24.535	By MS/MS	By matching	By MS/MS	By MS/MS	By matching	By MS/MS
AT1G11580.1	AT1G11580.1	8	8	8	>AT1G11580.1 | Symbols: ATPMEPCRA, PMEPCRA | methylesterase PCR A | chr1:3888730-3890649 FORWARD LENGTH=557	1	8	8	8	7	4	7	6	6	5	6	6	7	4	7	6	6	5	6	6	7	4	7	6	6	5	6	6	18.1	18.1	18.1	61.687	557	557	1	49	0	84.289	By MS/MS	By MS/MS	By MS/MS	By MS/MS	By MS/MS	By MS/MS
AT1G11860.3;AT1G11860.2;AT1G11860.1	AT1G11860.3;AT1G11860.2;AT1G11860.1	6;6;6	6;6;6	6;6;6	>AT1G11860.3 | Symbols: | Glycine cleavage T-protein family | chr1:4001801-4003245 FORWARD LENGTH=408;>AT1G11860.2 | Symbols: | Glycine cleavage T-protein family | chr1:4001801-4003245 FORWARD LENGTH=408;>AT1G11860.1 | Symbols: | Glycine cleavage T-prot	3	6	6	6	6	5	5	2	3	4	4	3	6	5	5	2	3	4	4	3	6	5	5	2	3	4	4	3	23.3	23.3	23.3	44.444	408	408;408;408	1	32	0	38.107	By MS/MS	By matching	By MS/MS	By MS/MS	By MS/MS	By MS/MS
AT1G12370.1;AT1G12370.2	AT1G12370.1;AT1G12370.2	3;3	3;3	3;3	>AT1G12370.1 | Symbols: PHR1, UVR2 | photolyase 1 | chr1:4206500-4208842 REVERSE LENGTH=490;>AT1G12370.2 | Symbols: PHR1, UVR2 | photolyase 1 | chr1:4206500-4208842 REVERSE LENGTH=496	2	3	3	3	1	1	1	2	2	3	2	3	1	1	1	2	2	3	2	3	1	1	1	2	2	3	2	3	7.8	7.8	7.8	56.354	490	490;496	1	15	0	21.485	By matching	By matching	By matching	By matching	By MS/MS	By matching
AT1G12770.1	AT1G12770.1	8	8	8	>AT1G12770.1 | Symbols: ISE1, EMB1586 | P-loop containing nucleoside triphosphate hydrolases superfamily protein | chr1:4351888-4353543 FORWARD LENGTH=551	1	8	8	8	8	3	7	7	5	5	3	5	8	3	7	7	5	5	3	5	8	3	7	7	5	5	3	5	19.4	19.4	19.4	60.718	551	551	1	62	0	56.015	By MS/MS	By MS/MS	By MS/MS	By MS/MS	By MS/MS	By MS/MS
AT1G12900.4;AT1G12900.3;AT1G12900.1;AT1G12900.2	AT1G12900.4;AT1G12900.3;AT1G12900.1;AT1G12900.2	14;14;14;11	4;4;4;1	4;4;4;1	>AT1G12900.4 | Symbols: GAPA-2 | glyceraldehyde 3-phosphate dehydrogenase A subunit 2 | chr1:4392634-4393850 REVERSE LENGTH=350;>AT1G12900.3 | Symbols: GAPA-2 | glyceraldehyde 3-phosphate dehydrogenase A subunit 2 | chr1:4392634-4393850 REVERSE LENGTH=350;	4	14	4	4	13	12	14	13	11	14	13	13	4	3	4	4	2	4	4	4	4	3	4	4	2	4	4	4	46.3	14.6	14.6	37.667	350	350;350;399;317	1	36	0	93.647	By MS/MS	By MS/MS	By MS/MS	By MS/MS	By MS/MS	By MS/MS
AT1G12920.1;AT3G26618.1;AT5G47880.2;AT5G47880.1	AT1G12920.1;AT3G26618.1	4;4;1;1	4;4;1;1	4;4;1;1	>AT1G12920.1 | Symbols: ERF1-2 | eukaryotic release factor 1-2 | chr1:4396555-4397859 REVERSE LENGTH=434;>AT3G26618.1 | Symbols: ERF1-3 | eukaryotic release factor 1-3 | chr3:9788854-9790161 FORWARD LENGTH=435	4	4	4	4	3	3	3	3	3	2	2	2	3	3	3	3	3	2	2	2	3	3	3	3	3	2	2	2	10.6	10.6	10.6	48.941	434	434;435;436;436	1	21	0	24.604	By MS/MS	By MS/MS	By MS/MS	By MS/MS	By MS/MS	By MS/MS
AT1G13270.1;AT1G13270.2	AT1G13270.1;AT1G13270.2	4;2	4;2	4;2	>AT1G13270.1 | Symbols: MAP1C, MAP1B | methionine aminopeptidase 1B | chr1:4544999-4547155 FORWARD LENGTH=369;>AT1G13270.2 | Symbols: MAP1C, MAP1B | methionine aminopeptidase 1B | chr1:4544999-4546574 FORWARD LENGTH=283	2	4	4	4	2	2	4	0	2	1	0	3	2	2	4	0	2	1	0	3	2	2	4	0	2	1	0	3	16.5	16.5	16.5	40.424	369	369;283	1	14	0	24.933	By MS/MS	By matching	By MS/MS	By matching	By MS/MS	By matching
AT1G13440.2;AT3G04120.1;AT1G13440.1	AT1G13440.2;AT3G04120.1;AT1G13440.1	7;7;7	7;7;7	7;7;7	>AT1G13440.2 | Symbols: GAPC-2, GAPC2 | glyceraldehyde-3-phosphate dehydrogenase C2 | chr1:4608465-4610494 REVERSE LENGTH=310;>AT3G04120.1 | Symbols: GAPC, GAPC-1, GAPC1 | glyceraldehyde-3-phosphate dehydrogenase C subunit 1 | chr3:1081077-1083131 FORWARD	3	7	7	7	7	6	4	5	7	7	7	7	7	6	4	5	7	7	7	7	7	6	4	5	7	7	7	7	31	31	31	33.905	310	310;338;338	1	60	0	80.201	By MS/MS	By MS/MS	By MS/MS	By MS/MS	By MS/MS	By MS/MS
AT1G14410.1	AT1G14410.1	5	5	4	>AT1G14410.1 | Symbols: ATWHY1, PTAC1, WHY1 | ssDNA-binding transcriptional regulator | chr1:4929352-4930810 REVERSE LENGTH=263	1	5	5	4	4	5	5	4	4	4	5	5	4	5	5	4	4	4	5	5	3	4	4	3	3	3	4	4	27.4	27.4	24	29.058	263	263	1	42	0	46.143	By MS/MS	By MS/MS	By MS/MS	By MS/MS	By MS/MS	By MS/MS
AT1G14650.2;AT1G14650.1;AT1G14640.1	AT1G14650.2;AT1G14650.1	5;5;1	5;5;1	5;5;1	>AT1G14650.2 | Symbols: | SWAP (Suppressor-of-White-APricot)/surp domain-containing protein / ubiquitin family protein | chr1:5028077-5030520 FORWARD LENGTH=785;>AT1G14650.1 | Symbols: | SWAP (Suppressor-of-White-APricot)/surp domain-containing protein /	3	5	5	5	2	1	2	3	3	2	5	3	2	1	2	3	3	2	5	3	2	1	2	3	3	2	5	3	6.9	6.9	6.9	87.593	785	785;785;735	1	21	0	28.997	By MS/MS	By matching	By MS/MS	By MS/MS	By MS/MS	By MS/MS
AT1G14850.1	AT1G14850.1	2	2	2	>AT1G14850.1 | Symbols: NUP155 | nucleoporin 155 | chr1:5116921-5123259 REVERSE LENGTH=1464	1	2	2	2	1	0	2	2	0	0	0	1	1	0	2	2	0	0	0	1	1	0	2	2	0	0	0	1	1.9	1.9	1.9	160.01	1464	1464	1	6	0	12.222	By matching	By matching	By MS/MS	By MS/MS	By matching	By matching
AT1G15820.1	AT1G15820.1	5	5	5	>AT1G15820.1 | Symbols: LHCB6, CP24 | light harvesting complex photosystem II subunit 6 | chr1:5446685-5447676 REVERSE LENGTH=258	1	5	5	5	5	4	5	4	4	4	4	4	5	4	5	4	4	4	4	4	5	4	5	4	4	4	4	4	19	19	19	27.522	258	258	1	37	0	59.585	By MS/MS	By MS/MS	By MS/MS	By MS/MS	By MS/MS	By MS/MS
AT1G15980.1	AT1G15980.1	3	3	3	>AT1G15980.1 | Symbols: NDF1, NDH48 | NDH-dependent cyclic electron flow 1 | chr1:5489314-5491199 FORWARD LENGTH=461	1	3	3	3	2	2	3	2	2	2	1	1	2	2	3	2	2	2	1	1	2	2	3	2	2	2	1	1	8.2	8.2	8.2	51.022	461	461	1	15	0	19.542	By MS/MS	By MS/MS	By MS/MS	By MS/MS	By matching	By matching
AT1G16300.1;AT1G79530.1	AT1G16300.1;AT1G79530.1	3;2	3;2	3;2	>AT1G16300.1 | Symbols: GAPCP-2 | glyceraldehyde-3-phosphate dehydrogenase of plastid 2 | chr1:5574433-5577406 FORWARD LENGTH=420;>AT1G79530.1 | Symbols: GAPCP-1 | glyceraldehyde-3-phosphate dehydrogenase of plastid 1 | chr1:29916232-29919088 REVERSE LENGT	2	3	3	3	1	3	2	2	2	2	1	2	1	3	2	2	2	2	1	2	1	3	2	2	2	2	1	2	8.8	8.8	8.8	44.845	420	420;422	1	15	0	18.016	By MS/MS	By MS/MS	By MS/MS	By MS/MS	By MS/MS	By MS/MS
AT1G16720.1	AT1G16720.1	15	15	15	>AT1G16720.1 | Symbols: HCF173 | high chlorophyll fluorescence phenotype 173 | chr1:5723161-5726248 FORWARD LENGTH=598	1	15	15	15	14	8	12	12	15	13	13	14	14	8	12	12	15	13	13	14	14	8	12	12	15	13	13	14	33.3	33.3	33.3	65.708	598	598	1	110	0	121.81	By MS/MS	By MS/MS	By MS/MS	By MS/MS	By MS/MS	By MS/MS
AT1G16790.1	AT1G16790.1	2	2	2	>AT1G16790.1 | Symbols: | ribosomal protein-related | chr1:5744638-5745072 FORWARD LENGTH=144	1	2	2	2	2	1	1	2	2	2	1	2	2	1	1	2	2	2	1	2	2	1	1	2	2	2	1	2	14.6	14.6	14.6	15.454	144	144	1	13	0	12.197	By MS/MS	By matching	By matching	By MS/MS	By MS/MS	By matching
AT1G17220.1	AT1G17220.1	15	15	15	>AT1G17220.1 | Symbols: FUG1 | Translation initiation factor 2, small GTP-binding protein | chr1:5885383-5890165 FORWARD LENGTH=1026	1	15	15	15	13	10	12	11	13	13	11	12	13	10	12	11	13	13	11	12	13	10	12	11	13	13	11	12	16.2	16.2	16.2	109.75	1026	1026	1	100	0	108.92	By MS/MS	By MS/MS	By MS/MS	By MS/MS	By MS/MS	By MS/MS
AT1G17690.1	AT1G17690.1	2	2	2	>AT1G17690.1 | Symbols: NOF1 | FUNCTIONS IN: molecular_function unknown; INVOLVED IN: biological_process unknown; LOCATED IN: nucleus; EXPRESSED IN: 24 plant structures; EXPRESSED DURING: 13 growth stages; CONTAINS InterPro DOMAIN/s: Digestive organ expans	1	2	2	2	2	1	2	2	2	0	1	2	2	1	2	2	2	0	1	2	2	1	2	2	2	0	1	2	2.8	2.8	2.8	86.919	754	754	1	12	0	12.129	By matching	By matching	By MS/MS	By MS/MS	By MS/MS	By matching
AT1G18060.1	AT1G18060.1	5	5	5	>AT1G18060.1 | Symbols: | unknown protein; INVOLVED IN: biological_process unknown; LOCATED IN: chloroplast; EXPRESSED IN: 22 plant structures; EXPRESSED DURING: 13 growth stages; Has 74 Blast hits to 74 proteins in 29 species: Archae - 0; Bacteria - 19;	1	5	5	5	5	5	5	4	3	5	4	5	5	5	5	4	3	5	4	5	5	5	5	4	3	5	4	5	29.2	29.2	29.2	25.198	226	226	1	44	0	30.982	By MS/MS	By MS/MS	By MS/MS	By MS/MS	By matching	By MS/MS
AT1G18080.1	AT1G18080.1	11	11	8	>AT1G18080.1 | Symbols: ATARCA, RACK1A_AT, RACK1A | Transducin/WD40 repeat-like superfamily protein | chr1:6222325-6223901 FORWARD LENGTH=327	1	11	11	8	8	6	8	9	6	7	5	9	8	6	8	9	6	7	5	9	8	5	7	7	5	5	5	7	45.9	45.9	38.8	35.747	327	327	1	70	0	92.502	By MS/MS	By MS/MS	By MS/MS	By MS/MS	By MS/MS	By MS/MS
AT1G18440.1	AT1G18440.1	4	4	4	>AT1G18440.1 | Symbols: | Peptidyl-tRNA hydrolase family protein | chr1:6345994-6347686 FORWARD LENGTH=288	1	4	4	4	3	1	4	3	3	2	1	4	3	1	4	3	3	2	1	4	3	1	4	3	3	2	1	4	16.7	16.7	16.7	31.561	288	288	1	22	0	31.672	By MS/MS	By matching	By MS/MS	By MS/MS	By MS/MS	By MS/MS
AT1G18450.1	AT1G18450.1	6	6	6	>AT1G18450.1 | Symbols: ATARP4, ARP4 | actin-related protein 4 | chr1:6348199-6351766 FORWARD LENGTH=441	1	6	6	6	5	5	5	5	6	5	5	6	5	5	5	5	6	5	5	6	5	5	5	5	6	5	5	6	14.7	14.7	14.7	48.936	441	441	1	50	0	36.658	By MS/MS	By MS/MS	By MS/MS	By MS/MS	By MS/MS	By MS/MS
AT1G18610.1	AT1G18610.1	2	2	2	>AT1G18610.1 | Symbols: | Galactose oxidase/kelch repeat superfamily protein | chr1:6405779-6408831 FORWARD LENGTH=556	1	2	2	2	2	2	1	1	2	2	2	2	2	2	1	1	2	2	2	2	2	2	1	1	2	2	2	2	3.8	3.8	3.8	60.857	556	556	1	14	0	11.466	By MS/MS	By matching	By MS/MS	By matching	By MS/MS	By MS/MS
AT1G20020.2;AT1G20020.1;AT1G20020.3	AT1G20020.2;AT1G20020.1;AT1G20020.3	10;10;9	9;9;8	9;9;8	>AT1G20020.2 | Symbols: ATLFNR2 | ferredoxin-NADP(+)-oxidoreductase 2 | chr1:6942851-6944868 FORWARD LENGTH=350;>AT1G20020.1 | Symbols: ATLFNR2, FNR2 | ferredoxin-NADP(+)-oxidoreductase 2 | chr1:6942851-6944868 FORWARD LENGTH=369;>AT1G20020.3 | Symbols: AT	3	10	9	9	8	9	9	8	9	8	9	8	7	9	8	7	8	7	8	7	7	9	8	7	8	7	8	7	33.7	30.6	30.6	39.233	350	350;369;369	1	74	0	118.12	By MS/MS	By MS/MS	By MS/MS	By MS/MS	By MS/MS	By MS/MS
AT1G20190.1	AT1G20190.1	3	3	3	>AT1G20190.1 | Symbols: ATEXPA11, EXP11, ATEXP11, ATHEXP ALPHA 1.14, EXPA11 | expansin 11 | chr1:6998762-6999710 REVERSE LENGTH=252	1	3	3	3	3	3	3	3	3	3	3	3	3	3	3	3	3	3	3	3	3	3	3	3	3	3	3	3	15.5	15.5	15.5	26.761	252	252	1	30	0	177.71	By MS/MS	By MS/MS	By MS/MS	By MS/MS	By MS/MS	By MS/MS
AT1G20580.1;AT1G76300.1;AT1G20600.1	AT1G20580.1;AT1G76300.1;AT1G20600.1	2;1;1	2;1;1	2;1;1	>AT1G20580.1 | Symbols: | Small nuclear ribonucleoprotein family protein | chr1:7128979-7130371 FORWARD LENGTH=131;>AT1G76300.1 | Symbols: SmD3 | snRNP core protein SMD3 | chr1:28625957-28627080 FORWARD LENGTH=128;>AT1G20600.1 | Symbols: | AP2/B3-like tr	3	2	2	2	2	2	2	2	2	2	2	2	2	2	2	2	2	2	2	2	2	2	2	2	2	2	2	2	19.1	19.1	19.1	14.237	131	131;128;237	1	27	0	12.538	By MS/MS	By MS/MS	By MS/MS	By MS/MS	By MS/MS	By MS/MS
AT1G20960.2;AT1G20960.1;AT2G42270.1	AT1G20960.2;AT1G20960.1	37;37;7	37;37;7	37;37;7	>AT1G20960.2 | Symbols: emb1507 | U5 small nuclear ribonucleoprotein helicase, putative | chr1:7302591-7309914 REVERSE LENGTH=2171;>AT1G20960.1 | Symbols: emb1507 | U5 small nuclear ribonucleoprotein helicase, putative | chr1:7302591-7309914 REVERSE LENGTH	3	37	37	37	34	5	35	29	34	23	32	24	34	5	35	29	34	23	32	24	34	5	35	29	34	23	32	24	20.8	20.8	20.8	247.1	2171	2171;2171;2172	1	236	0	246.14	By MS/MS	By matching	By MS/MS	By MS/MS	By MS/MS	By MS/MS
AT1G21500.1	AT1G21500.1	2	2	2	>AT1G21500.1 | Symbols: | unknown protein; Has 29 Blast hits to 29 proteins in 12 species: Archae - 0; Bacteria - 0; Metazoa - 0; Fungi - 2; Plants - 27; Viruses - 0; Other Eukaryotes - 0 (source: NCBI BLink). | chr1:7530047-7530954 REVERSE LENGTH=126	1	2	2	2	2	1	2	2	2	2	2	2	2	1	2	2	2	2	2	2	2	1	2	2	2	2	2	2	8.7	8.7	8.7	13.258	126	126	1	23	0	12.491	By MS/MS	By MS/MS	By MS/MS	By MS/MS	By MS/MS	By MS/MS
AT1G22700.3;AT1G22700.2;AT1G22700.1	AT1G22700.3;AT1G22700.2;AT1G22700.1	3;3;3	3;3;3	3;3;3	>AT1G22700.3 | Symbols: | Tetratricopeptide repeat (TPR)-like superfamily protein | chr1:8028323-8029289 REVERSE LENGTH=211;>AT1G22700.2 | Symbols: | Tetratricopeptide repeat (TPR)-like superfamily protein | chr1:8028323-8029878 REVERSE LENGTH=296;>AT1G2	3	3	3	3	3	3	2	3	1	1	2	2	3	3	2	3	1	1	2	2	3	3	2	3	1	1	2	2	17.1	17.1	17.1	23.811	211	211;296;301	1	18	0	20.276	By MS/MS	By matching	By matching	By MS/MS	By matching	By matching
AT4G09800.1;AT1G34030.1;AT1G22780.1	AT4G09800.1;AT1G34030.1;AT1G22780.1	3;3;3	3;3;3	3;3;3	>AT4G09800.1 | Symbols: RPS18C | S18 ribosomal protein | chr4:6173818-6174963 FORWARD LENGTH=152;>AT1G34030.1 | Symbols: | Ribosomal protein S13/S18 family | chr1:12370285-12371465 REVERSE LENGTH=152;>AT1G22780.1 | Symbols: PFL, RPS18A, PFL1 | Ribosomal p	3	3	3	3	2	1	3	3	2	1	1	3	2	1	3	3	2	1	1	3	2	1	3	3	2	1	1	3	22.4	22.4	22.4	17.545	152	152;152;152	1	16	0	75.588	By MS/MS	By matching	By MS/MS	By MS/MS	By matching	By matching
AT1G23410.1;AT3G62250.1;AT2G47110.2;AT2G47110.1;AT3G52590.1;AT2G36170.1;AT4G05050.4;AT2G35635.1;AT1G31340.1;AT4G05050.3;AT4G05050.2;AT4G05050.1;AT4G02890.2;AT4G02890.1;AT1G55060.1;AT4G05320.5;AT4G02890.4;AT4G02890.3;AT5G03240.3;AT5G03240.2;AT5G03240.1;AT1G65350.1;AT5G37640.1;AT4G05320.6;AT4G05320.3;AT4G05320.1;AT5G20620.1;AT4G05320.4;AT4G05320.2;AT3G09790.1	AT1G23410.1;AT3G62250.1;AT2G47110.2;AT2G47110.1;AT3G52590.1;AT2G36170.1;AT4G05050.4;AT2G35635.1;AT1G31340.1;AT4G05050.3;AT4G05050.2;AT4G05050.1;AT4G02890.2;AT4G02890.1;AT1G55060.1;AT4G05320.5;AT4G02890.4;AT4G02890.3;AT5G03240.3;AT5G03240.2;AT5G03240.1;AT1G65350.1;AT5G37640.1;AT4G05320.6;AT4G05320.3;AT4G05320.1;AT5G20620.1;AT4G05320.4;AT4G05320.2;AT3G09790.1	5;5;5;5;4;4;4;4;4;4;4;4;4;4;4;4;4;4;4;4;4;4;4;4;4;4;4;4;4;3	5;5;5;5;4;4;4;4;4;4;4;4;4;4;4;4;4;4;4;4;4;4;4;4;4;4;4;4;4;3	5;5;5;5;4;4;4;4;4;4;4;4;4;4;4;4;4;4;4;4;4;4;4;4;4;4;4;4;4;3	>AT1G23410.1 | Symbols: | Ribosomal protein S27a / Ubiquitin family protein | chr1:8314940-8315410 FORWARD LENGTH=156;>AT3G62250.1 | Symbols: UBQ5 | ubiquitin 5 | chr3:23037138-23037611 FORWARD LENGTH=157;>AT2G47110.2 | Symbols: UBQ6 | ubiquitin 6 | chr2:	30	5	5	5	4	2	2	4	3	3	4	4	4	2	2	4	3	3	4	4	4	2	2	4	3	3	4	4	35.3	35.3	35.3	17.671	156	156;157;157;157;128;128;153;154;156;229;229;229;229;229;230;305;305;305;306;306;306;319;322;381;381;381;382;457;457;631	1	33	0	81.985	By MS/MS	By MS/MS	By MS/MS	By MS/MS	By MS/MS	By MS/MS
AT1G24360.1	AT1G24360.1	9	9	9	>AT1G24360.1 | Symbols: | NAD(P)-binding Rossmann-fold superfamily protein | chr1:8640820-8643283 FORWARD LENGTH=319	1	9	9	9	8	8	9	7	7	7	7	8	8	8	9	7	7	7	7	8	8	8	9	7	7	7	7	8	31.3	31.3	31.3	33.548	319	319	1	94	0	214.76	By MS/MS	By MS/MS	By MS/MS	By MS/MS	By MS/MS	By MS/MS
AT1G24450.1	AT1G24450.1	3	3	3	>AT1G24450.1 | Symbols: NFD2 | Ribonuclease III family protein | chr1:8664201-8665077 FORWARD LENGTH=191	1	3	3	3	0	0	0	0	3	2	2	3	0	0	0	0	3	2	2	3	0	0	0	0	3	2	2	3	20.4	20.4	20.4	20.742	191	191	1	10	0	37.672	By matching	By matching	By matching	By matching	By MS/MS	By MS/MS
AT1G24510.2;AT1G24510.1	AT1G24510.2;AT1G24510.1	3;3	3;3	3;3	>AT1G24510.2 | Symbols: | TCP-1/cpn60 chaperonin family protein | chr1:8685504-8687660 REVERSE LENGTH=459;>AT1G24510.1 | Symbols: | TCP-1/cpn60 chaperonin family protein | chr1:8685504-8688101 REVERSE LENGTH=535	2	3	3	3	3	2	3	2	2	3	0	3	3	2	3	2	2	3	0	3	3	2	3	2	2	3	0	3	5.7	5.7	5.7	51.146	459	459;535	1	18	0	17.371	By MS/MS	By matching	By MS/MS	By matching	By matching	By MS/MS
AT1G27090.1	AT1G27090.1	3	3	3	>AT1G27090.1 | Symbols: | glycine-rich protein | chr1:9404041-9406098 REVERSE LENGTH=420	1	3	3	3	2	1	2	3	3	1	2	2	2	1	2	3	3	1	2	2	2	1	2	3	3	1	2	2	9.8	9.8	9.8	46.018	420	420	1	16	0	24.701	By MS/MS	By matching	By matching	By MS/MS	By MS/MS	By MS/MS
AT1G28110.2;AT1G28110.1	AT1G28110.2;AT1G28110.1	5;5	5;5	5;5	>AT1G28110.2 | Symbols: SCPL45 | serine carboxypeptidase-like 45 | chr1:9804153-9806832 REVERSE LENGTH=461;>AT1G28110.1 | Symbols: SCPL45 | serine carboxypeptidase-like 45 | chr1:9804153-9806832 REVERSE LENGTH=461	2	5	5	5	4	3	4	5	3	3	3	5	4	3	4	5	3	3	3	5	4	3	4	5	3	3	3	5	13.2	13.2	13.2	51.802	461	461;461	1	34	0	29.686	By MS/MS	By MS/MS	By MS/MS	By MS/MS	By MS/MS	By matching
AT1G28290.2;AT1G28290.1	AT1G28290.2;AT1G28290.1	8;8	8;8	8;8	>AT1G28290.2 | Symbols: AGP31 | arabinogalactan protein 31 | chr1:9889331-9890843 REVERSE LENGTH=315;>AT1G28290.1 | Symbols: AGP31 | arabinogalactan protein 31 | chr1:9889331-9890843 REVERSE LENGTH=359	2	8	8	8	8	8	8	8	8	8	8	8	8	8	8	8	8	8	8	8	8	8	8	8	8	8	8	8	19.7	19.7	19.7	33.932	315	315;359	1	77	0	79.163	By MS/MS	By MS/MS	By MS/MS	By MS/MS	By MS/MS	By MS/MS
AT1G28600.1;AT1G28600.2	AT1G28600.1;AT1G28600.2	5;4	5;4	5;4	>AT1G28600.1 | Symbols: | GDSL-like Lipase/Acylhydrolase superfamily protein | chr1:10051228-10053073 REVERSE LENGTH=393;>AT1G28600.2 | Symbols: | GDSL-like Lipase/Acylhydrolase superfamily protein | chr1:10051604-10053073 REVERSE LENGTH=298	2	5	5	5	2	0	5	1	0	0	0	1	2	0	5	1	0	0	0	1	2	0	5	1	0	0	0	1	23.2	23.2	23.2	43.61	393	393;298	1	9	0	44.624	By MS/MS	By matching	By MS/MS	By matching	By matching	By matching
AT1G29050.1	AT1G29050.1	3	3	3	>AT1G29050.1 | Symbols: TBL38 | TRICHOME BIREFRINGENCE-LIKE 38 | chr1:10136376-10139082 REVERSE LENGTH=380	1	3	3	3	3	3	3	2	3	3	3	3	3	3	3	2	3	3	3	3	3	3	3	2	3	3	3	3	10.3	10.3	10.3	42.708	380	380	1	23	0	18.314	By MS/MS	By matching	By MS/MS	By MS/MS	By MS/MS	By MS/MS
AT2G34160.1;AT1G29250.1;AT3G04620.1	AT2G34160.1;AT1G29250.1	3;3;1	3;3;1	3;3;1	>AT2G34160.1 | Symbols: | Alba DNA/RNA-binding protein | chr2:14426283-14427220 FORWARD LENGTH=130;>AT1G29250.1 | Symbols: | Alba DNA/RNA-binding protein | chr1:10223461-10224592 REVERSE LENGTH=130	3	3	3	3	2	2	2	2	3	3	3	3	2	2	2	2	3	3	3	3	2	2	2	2	3	3	3	3	24.6	24.6	24.6	14.617	130	130;130;164	1	20	0	28.782	By matching	By matching	By matching	By MS/MS	By MS/MS	By MS/MS
AT1G29670.1	AT1G29670.1	5	5	5	>AT1G29670.1 | Symbols: | GDSL-like Lipase/Acylhydrolase superfamily protein | chr1:10375843-10377717 FORWARD LENGTH=363	1	5	5	5	4	2	5	3	1	3	4	3	4	2	5	3	1	3	4	3	4	2	5	3	1	3	4	3	18.2	18.2	18.2	39.871	363	363	1	25	0	32.486	By MS/MS	By MS/MS	By MS/MS	By MS/MS	By MS/MS	By MS/MS
AT1G29900.1	AT1G29900.1	2	2	2	>AT1G29900.1 | Symbols: CARB | carbamoyl phosphate synthetase B | chr1:10468164-10471976 FORWARD LENGTH=1187	1	2	2	2	2	2	1	2	1	2	1	1	2	2	1	2	1	2	1	1	2	2	1	2	1	2	1	1	1.9	1.9	1.9	129.96	1187	1187	1	12	0	45.821	By MS/MS	By MS/MS	By MS/MS	By MS/MS	By MS/MS	By MS/MS
AT1G30230.1;AT1G30230.2;AT2G18110.1	AT1G30230.1;AT1G30230.2;AT2G18110.1	6;6;3	6;6;3	6;6;3	>AT1G30230.1 | Symbols: | Glutathione S-transferase, C-terminal-like;Translation elongation factor EF1B/ribosomal protein S6 | chr1:10639286-10640515 FORWARD LENGTH=231;>AT1G30230.2 | Symbols: | Glutathione S-transferase, C-terminal-like;Translation elo	3	6	6	6	4	4	6	4	4	4	3	3	4	4	6	4	4	4	3	3	4	4	6	4	4	4	3	3	38.1	38.1	38.1	25.132	231	231;260;231	1	43	0	50.917	By MS/MS	By MS/MS	By MS/MS	By MS/MS	By MS/MS	By MS/MS
AT1G30360.1	AT1G30360.1	2	2	2	>AT1G30360.1 | Symbols: ERD4 | Early-responsive to dehydration stress protein (ERD4) | chr1:10715892-10718799 FORWARD LENGTH=724	1	2	2	2	2	0	2	2	1	1	1	0	2	0	2	2	1	1	1	0	2	0	2	2	1	1	1	0	3.3	3.3	3.3	81.934	724	724	1	9	0	12.744	By MS/MS	By matching	By matching	By MS/MS	By matching	By matching
AT1G31330.1	AT1G31330.1	5	5	5	>AT1G31330.1 | Symbols: PSAF | photosystem I subunit F | chr1:11215011-11215939 REVERSE LENGTH=221	1	5	5	5	5	5	5	4	5	4	5	5	5	5	5	4	5	4	5	5	5	5	5	4	5	4	5	5	26.7	26.7	26.7	24.173	221	221	1	46	0	52.019	By MS/MS	By MS/MS	By MS/MS	By MS/MS	By MS/MS	By MS/MS
AT1G31690.1;AT1G31710.1;AT1G31670.1	AT1G31690.1	9;1;1	9;1;1	9;1;1	>AT1G31690.1 | Symbols: | Copper amine oxidase family protein | chr1:11343980-11347767 FORWARD LENGTH=677	3	9	9	9	4	4	9	7	4	4	4	4	4	4	9	7	4	4	4	4	4	4	9	7	4	4	4	4	15.5	15.5	15.5	76.673	677	677;681;741	1	41	0	60.658	By MS/MS	By MS/MS	By MS/MS	By MS/MS	By MS/MS	By MS/MS
AT1G31970.1	AT1G31970.1	10	10	10	>AT1G31970.1 | Symbols: STRS1 | DEA(D/H)-box RNA helicase family protein | chr1:11479921-11482707 FORWARD LENGTH=537	1	10	10	10	5	0	7	1	4	1	0	10	5	0	7	1	4	1	0	10	5	0	7	1	4	1	0	10	22	22	22	59.603	537	537	1	29	0	64.085	By matching	By matching	By MS/MS	By matching	By matching	By matching
AT1G32060.1	AT1G32060.1	9	9	9	>AT1G32060.1 | Symbols: PRK | phosphoribulokinase | chr1:11532668-11534406 FORWARD LENGTH=395	1	9	9	9	9	7	9	8	7	7	7	6	9	7	9	8	7	7	7	6	9	7	9	8	7	7	7	6	27.3	27.3	27.3	44.463	395	395	1	88	0	61.264	By MS/MS	By MS/MS	By MS/MS	By MS/MS	By MS/MS	By MS/MS
AT1G32990.1	AT1G32990.1	4	4	4	>AT1G32990.1 | Symbols: PRPL11 | plastid ribosomal protein l11 | chr1:11955827-11957139 FORWARD LENGTH=222	1	4	4	4	4	3	4	3	3	3	3	3	4	3	4	3	3	3	3	3	4	3	4	3	3	3	3	3	23.9	23.9	23.9	23.148	222	222	1	26	0	26.762	By MS/MS	By MS/MS	By MS/MS	By MS/MS	By MS/MS	By MS/MS
AT1G33140.1;AT1G33120.1;AT4G10450.1	AT1G33140.1;AT1G33120.1	8;8;3	8;8;3	8;8;3	>AT1G33140.1 | Symbols: PGY2 | Ribosomal protein L6 family | chr1:12023360-12024502 FORWARD LENGTH=194;>AT1G33120.1 | Symbols: | Ribosomal protein L6 family | chr1:12010986-12012223 FORWARD LENGTH=194	3	8	8	8	8	4	8	6	4	5	4	4	8	4	8	6	4	5	4	4	8	4	8	6	4	5	4	4	54.6	54.6	54.6	22.017	194	194;194;194	1	54	0	73.922	By MS/MS	By MS/MS	By MS/MS	By MS/MS	By MS/MS	By MS/MS
AT1G33330.1	AT1G33330.1	4	4	4	>AT1G33330.1 | Symbols: | Class I peptide chain release factor | chr1:12084968-12086238 FORWARD LENGTH=257	1	4	4	4	3	1	3	2	4	3	2	4	3	1	3	2	4	3	2	4	3	1	3	2	4	3	2	4	18.3	18.3	18.3	27.646	257	257	1	22	0	36.8	By matching	By matching	By MS/MS	By matching	By MS/MS	By MS/MS
AT1G33590.1;AT1G33612.1	AT1G33590.1	14;1	14;1	13;1	>AT1G33590.1 | Symbols: | Leucine-rich repeat (LRR) family protein | chr1:12177788-12179221 FORWARD LENGTH=477	2	14	14	13	11	10	14	12	10	9	11	13	11	10	14	12	10	9	11	13	11	10	13	12	10	9	11	12	36.9	36.9	32.5	51.741	477	477;455	1	106	0	136.19	By MS/MS	By MS/MS	By MS/MS	By MS/MS	By MS/MS	By MS/MS
AT1G33600.1	AT1G33600.1	12	11	11	>AT1G33600.1 | Symbols: | Leucine-rich repeat (LRR) family protein | chr1:12180776-12182212 FORWARD LENGTH=478	1	12	11	11	11	8	12	10	11	9	7	12	11	8	11	10	11	9	7	11	11	8	11	10	11	9	7	11	30.1	25.7	25.7	52.47	478	478	1	84	0	78.73	By MS/MS	By MS/MS	By MS/MS	By MS/MS	By MS/MS	By MS/MS
AT1G33811.1	AT1G33811.1	6	6	6	>AT1G33811.1 | Symbols: | GDSL-like Lipase/Acylhydrolase superfamily protein | chr1:12267918-12269690 FORWARD LENGTH=370	1	6	6	6	5	5	4	4	5	5	5	6	5	5	4	4	5	5	5	6	5	5	4	4	5	5	5	6	27	27	27	41.697	370	370	1	45	0	141.63	By MS/MS	By MS/MS	By MS/MS	By MS/MS	By MS/MS	By MS/MS
AT1G35140.1	AT1G35140.1	3	3	3	>AT1G35140.1 | Symbols: PHI-1, EXL7 | Phosphate-responsive 1 family protein | chr1:12852089-12853018 FORWARD LENGTH=309	1	3	3	3	2	1	1	1	3	3	3	3	2	1	1	1	3	3	3	3	2	1	1	1	3	3	3	3	12.6	12.6	12.6	33.185	309	309	1	26	0	52.447	By matching	By matching	By MS/MS	By MS/MS	By MS/MS	By MS/MS
AT1G41830.1;AT1G76160.1;AT1G21860.1	AT1G41830.1	9;3;1	9;3;1	8;3;1	>AT1G41830.1 | Symbols: SKS6 | SKU5-similar 6 | chr1:15603892-15607802 REVERSE LENGTH=542	3	9	9	8	8	7	8	6	6	6	6	7	8	7	8	6	6	6	6	7	7	6	7	5	5	5	5	6	23.2	23.2	20.3	60.577	542	542;541;538	1	57	0	120.58	By MS/MS	By MS/MS	By MS/MS	By MS/MS	By MS/MS	By MS/MS
AT1G42970.1	AT1G42970.1	15	15	13	>AT1G42970.1 | Symbols: GAPB | glyceraldehyde-3-phosphate dehydrogenase B subunit | chr1:16127552-16129584 FORWARD LENGTH=447	1	15	15	13	13	15	14	15	12	14	15	14	13	15	14	15	12	14	15	14	11	13	12	13	10	12	13	12	36	36	29.5	47.659	447	447	1	164	0	214.72	By MS/MS	By MS/MS	By MS/MS	By MS/MS	By MS/MS	By MS/MS
AT1G43170.9;AT1G43170.8;AT1G43170.7;AT1G43170.6;AT1G43170.5;AT1G43170.3;AT1G43170.2;AT1G43170.1;AT1G43170.4;AT1G61580.1	AT1G43170.9;AT1G43170.8;AT1G43170.7;AT1G43170.6;AT1G43170.5;AT1G43170.3;AT1G43170.2;AT1G43170.1;AT1G43170.4	5;5;5;5;5;5;5;5;4;2	5;5;5;5;5;5;5;5;4;2	5;5;5;5;5;5;5;5;4;2	>AT1G43170.9 | Symbols: RP1 | ribosomal protein 1 | chr1:16266992-16268631 FORWARD LENGTH=389;>AT1G43170.8 | Symbols: RP1 | ribosomal protein 1 | chr1:16266992-16268631 FORWARD LENGTH=389;>AT1G43170.7 | Symbols: RP1 | ribosomal protein 1 | chr1:16266992-16	10	5	5	5	4	3	3	2	3	2	4	4	4	3	3	2	3	2	4	4	4	3	3	2	3	2	4	4	12.6	12.6	12.6	44.559	389	389;389;389;389;389;389;389;389;306;390	1	25	0	56.605	By MS/MS	By MS/MS	By matching	By matching	By MS/MS	By MS/MS
AT1G44575.1;AT1G44575.2	AT1G44575.1;AT1G44575.2	6;4	6;4	6;4	>AT1G44575.1 | Symbols: NPQ4, PSBS | Chlorophyll A-B binding family protein | chr1:16871768-16873194 FORWARD LENGTH=265;>AT1G44575.2 | Symbols: NPQ4, PSBS | Chlorophyll A-B binding family protein | chr1:16871768-16872548 FORWARD LENGTH=205	2	6	6	6	6	6	6	6	6	5	6	6	6	6	6	6	6	5	6	6	6	6	6	6	6	5	6	6	24.2	24.2	24.2	28.007	265	265;205	1	57	0	100.5	By MS/MS	By MS/MS	By MS/MS	By MS/MS	By MS/MS	By MS/MS
AT1G48160.1	AT1G48160.1	3	3	3	>AT1G48160.1 | Symbols: | signal recognition particle 19 kDa protein, putative / SRP19, putative | chr1:17786779-17788286 REVERSE LENGTH=145	1	3	3	3	1	0	1	2	3	2	2	2	1	0	1	2	3	2	2	2	1	0	1	2	3	2	2	2	15.9	15.9	15.9	16.274	145	145	1	13	0	19.144	By matching	By matching	By matching	By matching	By MS/MS	By MS/MS
AT1G48350.1	AT1G48350.1	2	2	2	>AT1G48350.1 | Symbols: | Ribosomal L18p/L5e family protein | chr1:17867269-17868215 FORWARD LENGTH=170	1	2	2	2	2	0	2	2	2	2	2	2	2	0	2	2	2	2	2	2	2	0	2	2	2	2	2	2	11.8	11.8	11.8	18.726	170	170	1	14	0	13.953	By MS/MS	By matching	By MS/MS	By MS/MS	By MS/MS	By MS/MS
AT1G48410.1;AT1G48410.3;AT1G48410.2;AT5G43810.2;AT5G43810.1;AT2G27880.1	AT1G48410.1;AT1G48410.3;AT1G48410.2	19;19;19;2;2;1	19;19;19;2;2;1	19;19;19;2;2;1	>AT1G48410.1 | Symbols: AGO1 | Stabilizer of iron transporter SufD / Polynucleotidyl transferase | chr1:17886285-17891892 REVERSE LENGTH=1048;>AT1G48410.3 | Symbols: AGO1 | Stabilizer of iron transporter SufD / Polynucleotidyl transferase | chr1:17886285-1	6	19	19	19	18	13	15	17	17	16	14	17	18	13	15	17	17	16	14	17	18	13	15	17	17	16	14	17	20.7	20.7	20.7	116.19	1048	1048;1050;1050;988;988;997	1	127	0	129.71	By MS/MS	By MS/MS	By MS/MS	By MS/MS	By MS/MS	By MS/MS
AT1G48610.2;AT1G48610.1	AT1G48610.2;AT1G48610.1	3;3	3;3	3;3	>AT1G48610.2 | Symbols: | AT hook motif-containing protein | chr1:17971322-17972798 REVERSE LENGTH=198;>AT1G48610.1 | Symbols: | AT hook motif-containing protein | chr1:17971027-17972798 REVERSE LENGTH=212	2	3	3	3	2	1	2	2	3	2	3	3	2	1	2	2	3	2	3	3	2	1	2	2	3	2	3	3	28.3	28.3	28.3	20.208	198	198;212	1	18	0	26.306	By MS/MS	By MS/MS	By MS/MS	By MS/MS	By MS/MS	By MS/MS
AT1G48620.1	AT1G48620.1	4	4	4	>AT1G48620.1 | Symbols: HON5 | high mobility group A5 | chr1:17974148-17976301 REVERSE LENGTH=479	1	4	4	4	2	2	3	1	2	1	3	3	2	2	3	1	2	1	3	3	2	2	3	1	2	1	3	3	15.2	15.2	15.2	51.391	479	479	1	17	0	24.961	By MS/MS	By matching	By MS/MS	By matching	By MS/MS	By matching
AT1G48830.2;AT1G48830.1	AT1G48830.2;AT1G48830.1	3;3	3;3	3;3	>AT1G48830.2 | Symbols: | Ribosomal protein S7e family protein | chr1:18059854-18060935 REVERSE LENGTH=191;>AT1G48830.1 | Symbols: | Ribosomal protein S7e family protein | chr1:18059854-18060935 REVERSE LENGTH=191	2	3	3	3	3	3	3	2	3	3	3	3	3	3	3	2	3	3	3	3	3	3	3	2	3	3	3	3	16.8	16.8	16.8	21.922	191	191;191	1	23	0	19.569	By MS/MS	By MS/MS	By MS/MS	By MS/MS	By matching	By MS/MS
AT1G48850.1;AT1G48850.3;AT1G48850.2	AT1G48850.1	3;1;1	3;1;1	3;1;1	>AT1G48850.1 | Symbols: EMB1144 | chorismate synthase, putative / 5-enolpyruvylshikimate-3-phosphate phospholyase, putative | chr1:18065154-18067956 REVERSE LENGTH=436	3	3	3	3	2	2	3	2	1	2	1	1	2	2	3	2	1	2	1	1	2	2	3	2	1	2	1	1	8	8	8	47.317	436	436;380;380	1	14	0	17.816	By MS/MS	By matching	By MS/MS	By matching	By matching	By matching
AT1G48900.2;AT1G48900.1;AT5G49500.1;AT1G15310.1	AT1G48900.2;AT1G48900.1	5;5;2;1	5;5;2;1	5;5;2;1	>AT1G48900.2 | Symbols: | Signal recognition particle, SRP54 subunit protein | chr1:18085031-18087743 REVERSE LENGTH=431;>AT1G48900.1 | Symbols: | Signal recognition particle, SRP54 subunit protein | chr1:18084972-18087743 REVERSE LENGTH=495	4	5	5	5	5	4	5	5	4	4	2	3	5	4	5	5	4	4	2	3	5	4	5	5	4	4	2	3	14.6	14.6	14.6	47.726	431	431;495;497;479	1	32	0	37.092	By MS/MS	By MS/MS	By MS/MS	By MS/MS	By matching	By MS/MS
AT1G48920.1	AT1G48920.1	11	11	10	>AT1G48920.1 | Symbols: ATNUC-L1, PARL1, NUC-L1 | nucleolin like 1 | chr1:18098186-18101422 FORWARD LENGTH=557	1	11	11	10	9	8	7	7	10	10	9	10	9	8	7	7	10	10	9	10	8	7	6	6	9	9	8	9	19	19	17.4	58.773	557	557	1	85	0	81.576	By MS/MS	By MS/MS	By MS/MS	By MS/MS	By MS/MS	By MS/MS
AT1G49670.1;AT1G49670.2	AT1G49670.1;AT1G49670.2	16;16	16;16	16;16	>AT1G49670.1 | Symbols: NQR | ARP protein (REF) | chr1:18381591-18386021 REVERSE LENGTH=629;>AT1G49670.2 | Symbols: NQR | ARP protein (REF) | chr1:18381591-18386021 REVERSE LENGTH=652	2	16	16	16	13	8	13	13	14	11	10	15	13	8	13	13	14	11	10	15	13	8	13	13	14	11	10	15	27	27	27	67.943	629	629;652	1	118	0	145.89	By MS/MS	By MS/MS	By MS/MS	By MS/MS	By MS/MS	By MS/MS
AT1G49750.1	AT1G49750.1	9	9	9	>AT1G49750.1 | Symbols: | Leucine-rich repeat (LRR) family protein | chr1:18411177-18412779 REVERSE LENGTH=494	1	9	9	9	8	9	8	8	7	7	7	8	8	9	8	8	7	7	7	8	8	9	8	8	7	7	7	8	18.2	18.2	18.2	54.407	494	494	1	69	0	101.64	By MS/MS	By MS/MS	By MS/MS	By MS/MS	By MS/MS	By MS/MS
AT1G49760.2;AT1G49760.1	AT1G49760.2;AT1G49760.1	4;4	4;4	4;4	>AT1G49760.2 | Symbols: PAB8 | poly(A) binding protein 8 | chr1:18416740-18419753 FORWARD LENGTH=671;>AT1G49760.1 | Symbols: PAB8, PABP8 | poly(A) binding protein 8 | chr1:18416740-18419753 FORWARD LENGTH=671	2	4	4	4	2	2	3	3	3	3	2	2	2	2	3	3	3	3	2	2	2	2	3	3	3	3	2	2	8.2	8.2	8.2	72.779	671	671;671	1	20	0	24.875	By MS/MS	By matching	By MS/MS	By MS/MS	By MS/MS	By MS/MS
AT1G51510.1	AT1G51510.1	3	3	3	>AT1G51510.1 | Symbols: Y14 | RNA-binding (RRM/RBD/RNP motifs) family protein | chr1:19103072-19104753 REVERSE LENGTH=202	1	3	3	3	3	3	3	3	3	3	3	3	3	3	3	3	3	3	3	3	3	3	3	3	3	3	3	3	15.8	15.8	15.8	22.438	202	202	1	32	0	19.755	By MS/MS	By matching	By MS/MS	By MS/MS	By MS/MS	By MS/MS
AT3G57880.1;AT1G51570.1	AT3G57880.1;AT1G51570.1	3;3	3;3	3;3	>AT3G57880.1 | Symbols: | Calcium-dependent lipid-binding (CaLB domain) plant phosphoribosyltransferase family protein | chr3:21431198-21433519 REVERSE LENGTH=773;>AT1G51570.1 | Symbols: | Calcium-dependent lipid-binding (CaLB domain) plant phosphoribosy	2	3	3	3	2	2	3	2	1	0	2	1	2	2	3	2	1	0	2	1	2	2	3	2	1	0	2	1	4.4	4.4	4.4	89.192	773	773;776	1	13	0	18.464	By MS/MS	By matching	By MS/MS	By MS/MS	By MS/MS	By matching
AT1G52740.1;AT4G13570.1;AT4G13570.2;AT3G54560.1;AT2G38810.3;AT2G38810.2;AT2G38810.1;AT5G59870.1;AT5G27670.1	AT1G52740.1;AT4G13570.1;AT4G13570.2;AT3G54560.1;AT2G38810.3;AT2G38810.2;AT2G38810.1	3;2;2;2;2;2;2;1;1	3;2;2;2;2;2;2;1;1	2;2;2;2;2;2;2;0;0	>AT1G52740.1 | Symbols: HTA9 | histone H2A protein 9 | chr1:19645409-19646221 FORWARD LENGTH=134;>AT4G13570.1 | Symbols: HTA4 | histone H2A 4 | chr4:7884516-7885664 FORWARD LENGTH=118;>AT4G13570.2 | Symbols: HTA4 | histone H2A 4 | chr4:7884582-7885664 FORW	9	3	3	2	3	3	3	3	2	3	2	3	3	3	3	3	2	3	2	3	2	2	2	2	1	2	1	2	19.4	19.4	12.7	14.271	134	134;118;124;136;136;136;136;150;150	1	22	0	21.302	By MS/MS	By MS/MS	By MS/MS	By MS/MS	By MS/MS	By MS/MS
AT3G15020.2;AT3G15020.1;AT1G53240.1	AT3G15020.2;AT3G15020.1;AT1G53240.1	3;3;3	3;3;3	2;2;2	>AT3G15020.2 | Symbols: mMDH2 | Lactate/malate dehydrogenase family protein | chr3:5056139-5057865 FORWARD LENGTH=316;>AT3G15020.1 | Symbols: mMDH2 | Lactate/malate dehydrogenase family protein | chr3:5056139-5057941 FORWARD LENGTH=341;>AT1G53240.1 | Symbo	3	3	3	2	3	2	3	3	1	2	0	0	3	2	3	3	1	2	0	0	2	1	2	2	1	1	0	0	12.3	12.3	8.9	33.133	316	316;341;341	1	14	0	26.542	By MS/MS	By matching	By MS/MS	By matching	By matching	By matching
AT1G54780.1	AT1G54780.1	4	4	4	>AT1G54780.1 | Symbols: TLP18.3 | thylakoid lumen 18.3 kDa protein | chr1:20439533-20440953 FORWARD LENGTH=285	1	4	4	4	4	2	4	4	4	4	4	4	4	2	4	4	4	4	4	4	4	2	4	4	4	4	4	4	17.5	17.5	17.5	31.138	285	285	1	31	0	25.638	By MS/MS	By matching	By MS/MS	By MS/MS	By MS/MS	By matching
AT1G55210.2;AT1G55210.1;AT3G13660.1	AT1G55210.2;AT1G55210.1	3;3;1	3;3;1	3;3;1	>AT1G55210.2 | Symbols: | Disease resistance-responsive (dirigent-like protein) family protein | chr1:20598057-20598620 REVERSE LENGTH=187;>AT1G55210.1 | Symbols: | Disease resistance-responsive (dirigent-like protein) family protein | chr1:20598057-2059	3	3	3	3	2	3	3	3	3	3	3	3	2	3	3	3	3	3	3	3	2	3	3	3	3	3	3	3	17.6	17.6	17.6	20.618	187	187;187;125	1	30	0	24.343	By MS/MS	By MS/MS	By matching	By MS/MS	By MS/MS	By MS/MS
AT1G55490.2;AT1G55490.1;AT3G13470.1;AT5G56500.2;AT5G56500.1;AT1G26230.2;AT1G26230.1	AT1G55490.2;AT1G55490.1;AT3G13470.1	15;15;14;7;7;1;1	15;15;14;7;7;1;1	15;15;14;7;7;1;1	>AT1G55490.2 | Symbols: CPN60B, LEN1 | chaperonin 60 beta | chr1:20715717-20718673 REVERSE LENGTH=600;>AT1G55490.1 | Symbols: CPN60B, LEN1 | chaperonin 60 beta | chr1:20715717-20718673 REVERSE LENGTH=600;>AT3G13470.1 | Symbols: | TCP-1/cpn60 chaperonin fa	7	15	15	15	14	12	14	12	8	10	12	11	14	12	14	12	8	10	12	11	14	12	14	12	8	10	12	11	32	32	32	63.808	600	600;600;596;597;597;559;611	1	103	0	106.86	By MS/MS	By MS/MS	By MS/MS	By MS/MS	By MS/MS	By MS/MS
AT1G56070.1;AT3G12915.1;AT3G12915.2	AT1G56070.1	13;5;4	13;5;4	13;5;4	>AT1G56070.1 | Symbols: LOS1 | Ribosomal protein S5/Elongation factor G/III/V family protein | chr1:20968245-20971077 REVERSE LENGTH=843	3	13	13	13	12	9	12	11	9	9	9	13	12	9	12	11	9	9	9	13	12	9	12	11	9	9	9	13	17.8	17.8	17.8	93.89	843	843;820;767	1	96	0	102.91	By MS/MS	By MS/MS	By MS/MS	By MS/MS	By MS/MS	By MS/MS
AT1G56110.1;AT3G12860.1	AT1G56110.1	6;1	6;1	6;1	>AT1G56110.1 | Symbols: NOP56 | homolog of nucleolar protein NOP56 | chr1:20984544-20986893 REVERSE LENGTH=522	2	6	6	6	4	3	4	4	4	2	3	6	4	3	4	4	4	2	3	6	4	3	4	4	4	2	3	6	11.9	11.9	11.9	58.673	522	522;499	1	30	0	37.318	By MS/MS	By matching	By MS/MS	By MS/MS	By matching	By MS/MS
AT1G57720.2;AT1G57720.1	AT1G57720.2;AT1G57720.1	7;7	4;4	4;4	>AT1G57720.2 | Symbols: | Translation elongation factor EF1B, gamma chain | chr1:21377873-21380114 FORWARD LENGTH=413;>AT1G57720.1 | Symbols: | Translation elongation factor EF1B, gamma chain | chr1:21377873-21380114 FORWARD LENGTH=413	2	7	4	4	7	7	7	7	6	6	6	7	4	4	4	4	4	4	4	4	4	4	4	4	4	4	4	4	19.4	13.3	13.3	46.4	413	413;413	1	39	0	54.019	By MS/MS	By MS/MS	By MS/MS	By MS/MS	By MS/MS	By MS/MS
AT1G58290.1	AT1G58290.1	2	2	2	>AT1G58290.1 | Symbols: HEMA1 | Glutamyl-tRNA reductase family protein | chr1:21624028-21626051 REVERSE LENGTH=543	1	2	2	2	2	0	2	2	1	0	1	0	2	0	2	2	1	0	1	0	2	0	2	2	1	0	1	0	5	5	5	59.515	543	543	1	8	0	12.138	By MS/MS	By matching	By matching	By MS/MS	By matching	By matching
AT1G62390.1	AT1G62390.1	4	4	4	>AT1G62390.1 | Symbols: Phox2 | Octicosapeptide/Phox/Bem1p (PB1) domain-containing protein / tetratricopeptide repeat (TPR)-containing protein | chr1:23084632-23086887 REVERSE LENGTH=751	1	4	4	4	1	2	2	3	2	2	3	3	1	2	2	3	2	2	3	3	1	2	2	3	2	2	3	3	6.5	6.5	6.5	82.707	751	751	1	18	0	26.892	By MS/MS	By MS/MS	By MS/MS	By MS/MS	By MS/MS	By MS/MS
AT1G62750.1	AT1G62750.1	7	7	7	>AT1G62750.1 | Symbols: ATSCO1, ATSCO1/CPEF-G, SCO1 | Translation elongation factor EFG/EF2 protein | chr1:23233622-23236321 REVERSE LENGTH=783	1	7	7	7	7	1	2	0	0	1	1	1	7	1	2	0	0	1	1	1	7	1	2	0	0	1	1	1	14	14	14	86.057	783	783	1	14	0	55.347	By MS/MS	By MS/MS	By MS/MS	By matching	By matching	By MS/MS
AT1G63680.1	AT1G63680.1	4	4	4	>AT1G63680.1 | Symbols: ATMURE, PDE316, MURE | acid-amino acid ligases;ligases;ATP binding;ATP binding;ligases | chr1:23614461-23617247 FORWARD LENGTH=772	1	4	4	4	2	1	1	1	2	4	4	4	2	1	1	1	2	4	4	4	2	1	1	1	2	4	4	4	6.2	6.2	6.2	85.586	772	772	1	23	0	25.804	By MS/MS	By matching	By MS/MS	By MS/MS	By MS/MS	By MS/MS
AT1G65260.1	AT1G65260.1	3	3	3	>AT1G65260.1 | Symbols: PTAC4, VIPP1 | plastid transcriptionally active 4 | chr1:24236329-24240428 FORWARD LENGTH=330	1	3	3	3	2	2	2	2	3	2	2	2	2	2	2	2	3	2	2	2	2	2	2	2	3	2	2	2	10	10	10	36.392	330	330	1	17	0	18.536	By matching	By matching	By matching	By MS/MS	By MS/MS	By MS/MS
AT1G65440.3;AT1G65440.2;AT1G65440.1	AT1G65440.3;AT1G65440.2;AT1G65440.1	5;5;5	5;5;5	5;5;5	>AT1G65440.3 | Symbols: GTB1 | global transcription factor group B1 | chr1:24306988-24314302 REVERSE LENGTH=1454;>AT1G65440.2 | Symbols: GTB1 | global transcription factor group B1 | chr1:24306908-24314327 REVERSE LENGTH=1642;>AT1G65440.1 | Symbols: GTB1 |	3	5	5	5	3	0	5	4	4	1	2	4	3	0	5	4	4	1	2	4	3	0	5	4	4	1	2	4	4.6	4.6	4.6	166.39	1454	1454;1642;1647	1	23	0	33.078	By MS/MS	By matching	By MS/MS	By MS/MS	By matching	By matching
AT1G65590.1;AT3G55260.1	AT1G65590.1	15;1	15;1	15;1	>AT1G65590.1 | Symbols: HEXO3, ATHEX1 | beta-hexosaminidase 3 | chr1:24385996-24390989 FORWARD LENGTH=535	2	15	15	15	13	12	13	11	15	14	12	15	13	12	13	11	15	14	12	15	13	12	13	11	15	14	12	15	35.1	35.1	35.1	60.013	535	535;541	1	148	0	150.2	By MS/MS	By MS/MS	By MS/MS	By MS/MS	By MS/MS	By MS/MS
AT1G65870.1;AT5G42500.1;AT3G58090.1	AT1G65870.1	4;1;1	4;1;1	4;1;1	>AT1G65870.1 | Symbols: | Disease resistance-responsive (dirigent-like protein) family protein | chr1:24503624-24504193 FORWARD LENGTH=189	3	4	4	4	4	4	4	4	4	4	4	4	4	4	4	4	4	4	4	4	4	4	4	4	4	4	4	4	25.9	25.9	25.9	20.395	189	189;185;271	1	54	0	63.276	By MS/MS	By MS/MS	By MS/MS	By MS/MS	By MS/MS	By MS/MS
AT1G66520.1	AT1G66520.1	5	5	5	>AT1G66520.1 | Symbols: pde194 | formyltransferase, putative | chr1:24816330-24818693 REVERSE LENGTH=355	1	5	5	5	5	3	4	5	4	4	4	4	5	3	4	5	4	4	4	4	5	3	4	5	4	4	4	4	17.7	17.7	17.7	38.502	355	355	1	33	0	29.222	By matching	By matching	By MS/MS	By MS/MS	By MS/MS	By MS/MS
AT1G67090.1;AT1G67090.2	AT1G67090.1	5;2	5;2	3;2	>AT1G67090.1 | Symbols: RBCS1A | ribulose bisphosphate carboxylase small chain 1A | chr1:25048465-25049249 REVERSE LENGTH=180	2	5	5	3	5	4	4	5	5	5	5	5	5	4	4	5	5	5	5	5	3	3	2	3	3	3	3	3	28.9	28.9	16.7	20.216	180	180;136	1	48	0	139.49	By MS/MS	By MS/MS	By MS/MS	By MS/MS	By MS/MS	By MS/MS
AT1G67230.1	AT1G67230.1	3	3	3	>AT1G67230.1 | Symbols: LINC1 | little nuclei1 | chr1:25151561-25156032 REVERSE LENGTH=1132	1	3	3	3	2	1	3	3	1	2	3	3	2	1	3	3	1	2	3	3	2	1	3	3	1	2	3	3	3.2	3.2	3.2	129.09	1132	1132	1	18	0	19.366	By matching	By matching	By MS/MS	By MS/MS	By MS/MS	By MS/MS
AT1G67680.1;AT1G67650.1	AT1G67680.1;AT1G67650.1	2;1	2;1	2;1	>AT1G67680.1 | Symbols: | SRP72 RNA-binding domain | chr1:25365962-25368464 REVERSE LENGTH=664;>AT1G67650.1 | Symbols: | SRP72 RNA-binding domain | chr1:25359832-25362395 REVERSE LENGTH=651	2	2	2	2	2	1	2	2	2	2	2	2	2	1	2	2	2	2	2	2	2	1	2	2	2	2	2	2	4.2	4.2	4.2	73.069	664	664;651	1	15	0	17.915	By matching	By matching	By matching	By MS/MS	By MS/MS	By matching
AT1G67700.3;AT1G67700.1;AT1G67700.2	AT1G67700.3;AT1G67700.1;AT1G67700.2	5;5;5	5;5;5	5;5;5	>AT1G67700.3 | Symbols: | unknown protein; FUNCTIONS IN: molecular_function unknown; INVOLVED IN: biological_process unknown; EXPRESSED IN: 22 plant structures; EXPRESSED DURING: 13 growth stages. | chr1:25374295-25375716 FORWARD LENGTH=229;>AT1G67700.1 |	3	5	5	5	4	5	4	5	4	4	5	5	4	5	4	5	4	4	5	5	4	5	4	5	4	4	5	5	21	21	21	25.911	229	229;230;231	1	45	0	110.89	By MS/MS	By MS/MS	By MS/MS	By MS/MS	By MS/MS	By MS/MS
AT1G68010.1;AT1G68010.2	AT1G68010.1;AT1G68010.2	3;3	3;3	3;3	>AT1G68010.1 | Symbols: HPR, ATHPR1 | hydroxypyruvate reductase | chr1:25493418-25495720 FORWARD LENGTH=386;>AT1G68010.2 | Symbols: HPR | hydroxypyruvate reductase | chr1:25493418-25495720 FORWARD LENGTH=387	2	3	3	3	3	1	3	3	1	1	0	1	3	1	3	3	1	1	0	1	3	1	3	3	1	1	0	1	9.8	9.8	9.8	42.247	386	386;387	1	15	0	18.961	By MS/MS	By matching	By MS/MS	By MS/MS	By matching	By matching
AT1G68560.1;AT3G45940.1	AT1G68560.1	22;2	22;2	22;2	>AT1G68560.1 | Symbols: ATXYL1, XYL1, TRG1 | alpha-xylosidase 1 | chr1:25734435-25737897 REVERSE LENGTH=915	2	22	22	22	20	22	19	19	16	16	20	19	20	22	19	19	16	16	20	19	20	22	19	19	16	16	20	19	31.6	31.6	31.6	102.4	915	915;868	1	217	0	323.31	By MS/MS	By MS/MS	By MS/MS	By MS/MS	By MS/MS	By MS/MS
AT1G68830.1	AT1G68830.1	11	11	11	>AT1G68830.1 | Symbols: STN7 | STT7 homolog STN7 | chr1:25872654-25875473 REVERSE LENGTH=562	1	11	11	11	11	7	11	9	7	5	9	9	11	7	11	9	7	5	9	9	11	7	11	9	7	5	9	9	23.3	23.3	23.3	63.251	562	562	1	85	0	74.412	By MS/MS	By MS/MS	By MS/MS	By MS/MS	By MS/MS	By MS/MS
AT1G69200.1	AT1G69200.1	5	5	5	>AT1G69200.1 | Symbols: FLN2 | fructokinase-like 2 | chr1:26016018-26018365 FORWARD LENGTH=616	1	5	5	5	4	2	4	4	5	5	4	5	4	2	4	4	5	5	4	5	4	2	4	4	5	5	4	5	7.8	7.8	7.8	69.258	616	616	1	33	0	33.027	By MS/MS	By matching	By MS/MS	By MS/MS	By MS/MS	By MS/MS
AT1G69530.2;AT1G69530.1;AT1G69530.5;AT1G69530.4;AT1G69530.3	AT1G69530.2;AT1G69530.1;AT1G69530.5;AT1G69530.4;AT1G69530.3	3;3;2;2;2	3;3;2;2;2	3;3;2;2;2	>AT1G69530.2 | Symbols: ATEXPA1, EXP1, AT-EXP1, ATEXP1, ATHEXP ALPHA 1.2, EXPA1 | expansin A1 | chr1:26142034-26143051 FORWARD LENGTH=250;>AT1G69530.1 | Symbols: ATEXPA1, EXP1, AT-EXP1, ATEXP1, ATHEXP ALPHA 1.2, EXPA1 | expansin A1 | chr1:26142034-26143051	5	3	3	3	3	2	2	2	3	3	2	3	3	2	2	2	3	3	2	3	3	2	2	2	3	3	2	3	19.2	19.2	19.2	26.517	250	250;250;245;274;275	1	27	0	56.261	By MS/MS	By MS/MS	By MS/MS	By MS/MS	By MS/MS	By MS/MS
AT1G70770.2;AT1G70770.1	AT1G70770.2;AT1G70770.1	4;4	4;4	4;4	>AT1G70770.2 | Symbols: | Protein of unknown function DUF2359, transmembrane | chr1:26688622-26691185 REVERSE LENGTH=610;>AT1G70770.1 | Symbols: | Protein of unknown function DUF2359, transmembrane | chr1:26688622-26691185 REVERSE LENGTH=610	2	4	4	4	4	1	4	4	4	2	2	3	4	1	4	4	4	2	2	3	4	1	4	4	4	2	2	3	8.4	8.4	8.4	66.864	610	610;610	1	24	0	24.685	By MS/MS	By matching	By MS/MS	By MS/MS	By MS/MS	By matching
AT1G71695.1	AT1G71695.1	3	3	3	>AT1G71695.1 | Symbols: | Peroxidase superfamily protein | chr1:26964359-26966557 FORWARD LENGTH=358	1	3	3	3	3	1	1	1	2	3	0	2	3	1	1	1	2	3	0	2	3	1	1	1	2	3	0	2	11.7	11.7	11.7	39.559	358	358	1	14	0	21.051	By MS/MS	By matching	By matching	By MS/MS	By MS/MS	By MS/MS
AT1G72150.1;AT1G22530.1	AT1G72150.1	10;2	10;2	10;2	>AT1G72150.1 | Symbols: PATL1 | PATELLIN 1 | chr1:27148558-27150652 FORWARD LENGTH=573	2	10	10	10	10	6	10	8	9	10	9	8	10	6	10	8	9	10	9	8	10	6	10	8	9	10	9	8	23.6	23.6	23.6	64.046	573	573;683	1	70	0	62.296	By MS/MS	By MS/MS	By MS/MS	By MS/MS	By MS/MS	By MS/MS
AT1G72370.2;AT1G72370.1;AT3G04770.2;AT3G04770.1	AT1G72370.2;AT1G72370.1	7;7;2;2	7;7;2;2	7;7;2;2	>AT1G72370.2 | Symbols: P40, AP40, RP40, RPSAA | 40s ribosomal protein SA | chr1:27243148-27244842 REVERSE LENGTH=294;>AT1G72370.1 | Symbols: P40, AP40, RP40, RPSAA | 40s ribosomal protein SA | chr1:27243148-27244842 REVERSE LENGTH=298	4	7	7	7	7	7	7	7	5	6	7	6	7	7	7	7	5	6	7	6	7	7	7	7	5	6	7	6	26.9	26.9	26.9	31.981	294	294;298;280;332	1	66	0	112.49	By MS/MS	By MS/MS	By MS/MS	By MS/MS	By MS/MS	By MS/MS
AT1G72610.1	AT1G72610.1	6	6	6	>AT1G72610.1 | Symbols: GLP1, ATGER1, GER1 | germin-like protein 1 | chr1:27339302-27339928 REVERSE LENGTH=208	1	6	6	6	4	3	3	4	6	6	5	5	4	3	3	4	6	6	5	5	4	3	3	4	6	6	5	5	21.2	21.2	21.2	21.559	208	208	1	56	0	77.629	By MS/MS	By MS/MS	By matching	By MS/MS	By MS/MS	By MS/MS
AT1G72710.1;AT4G08800.1;AT3G23340.1;AT4G14340.1;AT1G04440.1;AT1G03930.1;AT5G44100.1;AT4G28540.1;AT5G43320.1	AT1G72710.1	9;1;1;1;1;1;1;1;1	9;1;1;1;1;1;1;1;1	4;0;0;0;0;0;0;0;0	>AT1G72710.1 | Symbols: CKL2 | casein kinase 1-like protein 2 | chr1:27372553-27376178 FORWARD LENGTH=465	9	9	9	4	7	6	8	8	8	7	7	7	7	6	8	8	8	7	7	7	4	3	4	4	4	4	4	4	20	20	10.1	51.878	465	465;285;442;457;468;471;476;479;480	1	58	0	55.079	By MS/MS	By MS/MS	By MS/MS	By MS/MS	By MS/MS	By MS/MS
AT1G72970.2;AT1G72970.1;AT5G51950.2;AT5G51930.1;AT5G51950.1	AT1G72970.2;AT1G72970.1	10;10;1;1;1	10;10;1;1;1	10;10;1;1;1	>AT1G72970.2 | Symbols: HTH, EDA17 | Glucose-methanol-choline (GMC) oxidoreductase family protein | chr1:27452872-27455706 FORWARD LENGTH=567;>AT1G72970.1 | Symbols: HTH, EDA17 | Glucose-methanol-choline (GMC) oxidoreductase family protein | chr1:27452872-	5	10	10	10	6	9	2	6	9	9	8	10	6	9	2	6	9	9	8	10	6	9	2	6	9	9	8	10	18.9	18.9	18.9	62.209	567	567;594;553;582;586	1	65	0	78.489	By MS/MS	By MS/MS	By matching	By MS/MS	By MS/MS	By MS/MS
AT1G73180.2;AT1G73180.1	AT1G73180.2;AT1G73180.1	4;4	4;4	4;4	>AT1G73180.2 | Symbols: | Eukaryotic translation initiation factor eIF2A family protein | chr1:27518335-27521014 FORWARD LENGTH=484;>AT1G73180.1 | Symbols: | Eukaryotic translation initiation factor eIF2A family protein | chr1:27518335-27521432 FORWARD L	2	4	4	4	3	1	4	1	2	1	1	1	3	1	4	1	2	1	1	1	3	1	4	1	2	1	1	1	10.7	10.7	10.7	53.578	484	484;513	1	14	0	22.348	By matching	By matching	By MS/MS	By matching	By matching	By MS/MS
AT1G73530.1	AT1G73530.1	3	3	3	>AT1G73530.1 | Symbols: | RNA-binding (RRM/RBD/RNP motifs) family protein | chr1:27643801-27645386 REVERSE LENGTH=181	1	3	3	3	3	3	2	3	2	3	3	3	3	3	2	3	2	3	3	3	3	3	2	3	2	3	3	3	14.4	14.4	14.4	20.063	181	181	1	22	0	18.426	By MS/MS	By MS/MS	By matching	By MS/MS	By MS/MS	By MS/MS
AT1G73620.1;AT1G18250.1;AT1G18250.2	AT1G73620.1;AT1G18250.1;AT1G18250.2	2;1;1	2;1;1	2;1;1	>AT1G73620.1 | Symbols: | Pathogenesis-related thaumatin superfamily protein | chr1:27681432-27682954 FORWARD LENGTH=264;>AT1G18250.1 | Symbols: ATLP-1 | Pathogenesis-related thaumatin superfamily protein | chr1:6277024-6278005 REVERSE LENGTH=243;>AT1G182	3	2	2	2	2	1	2	1	1	1	1	1	2	1	2	1	1	1	1	1	2	1	2	1	1	1	1	1	11.4	11.4	11.4	28.213	264	264;243;244	1	10	0	16.789	By MS/MS	By MS/MS	By MS/MS	By MS/MS	By matching	By matching
AT1G73720.1	AT1G73720.1	3	3	3	>AT1G73720.1 | Symbols: SMU1 | transducin family protein / WD-40 repeat family protein | chr1:27725059-27729722 FORWARD LENGTH=511	1	3	3	3	3	2	3	3	2	3	3	3	3	2	3	3	2	3	3	3	3	2	3	3	2	3	3	3	7.6	7.6	7.6	57.723	511	511	1	22	0	21.169	By MS/MS	By MS/MS	By MS/MS	By MS/MS	By MS/MS	By MS/MS
AT1G74000.1	AT1G74000.1	9	9	9	>AT1G74000.1 | Symbols: SS3 | strictosidine synthase 3 | chr1:27829266-27831401 REVERSE LENGTH=329	1	9	9	9	7	3	6	4	7	7	5	7	7	3	6	4	7	7	5	7	7	3	6	4	7	7	5	7	35.6	35.6	35.6	34.666	329	329	1	46	0	82.346	By MS/MS	By MS/MS	By MS/MS	By MS/MS	By MS/MS	By MS/MS
AT1G74470.1	AT1G74470.1	5	5	5	>AT1G74470.1 | Symbols: | Pyridine nucleotide-disulphide oxidoreductase family protein | chr1:27991248-27992845 FORWARD LENGTH=467	1	5	5	5	4	1	4	3	2	1	3	2	4	1	4	3	2	1	3	2	4	1	4	3	2	1	3	2	13.1	13.1	13.1	51.837	467	467	1	20	0	34.99	By MS/MS	By matching	By MS/MS	By MS/MS	By MS/MS	By matching
AT1G74850.1	AT1G74850.1	3	3	3	>AT1G74850.1 | Symbols: PTAC2 | plastid transcriptionally active 2 | chr1:28119237-28122314 REVERSE LENGTH=862	1	3	3	3	3	2	2	3	2	3	3	3	3	2	2	3	2	3	3	3	3	2	2	3	2	3	3	3	4.1	4.1	4.1	96.324	862	862	1	21	0	24.469	By matching	By matching	By matching	By MS/MS	By MS/MS	By MS/MS
AT1G75350.1	AT1G75350.1	4	4	4	>AT1G75350.1 | Symbols: emb2184 | Ribosomal protein L31 | chr1:28272163-28272687 FORWARD LENGTH=144	1	4	4	4	4	1	4	3	4	4	4	3	4	1	4	3	4	4	4	3	4	1	4	3	4	4	4	3	38.2	38.2	38.2	16.033	144	144	1	41	0	26.834	By MS/MS	By matching	By MS/MS	By MS/MS	By MS/MS	By MS/MS
AT1G76110.1	AT1G76110.1	3	3	3	>AT1G76110.1 | Symbols: | HMG (high mobility group) box protein with ARID/BRIGHT DNA-binding domain | chr1:28555287-28557465 REVERSE LENGTH=338	1	3	3	3	3	2	1	2	3	2	3	3	3	2	1	2	3	2	3	3	3	2	1	2	3	2	3	3	10.9	10.9	10.9	38.774	338	338	1	19	0	18.991	By MS/MS	By MS/MS	By MS/MS	By MS/MS	By matching	By MS/MS
AT1G76730.1	AT1G76730.1	3	3	3	>AT1G76730.1 | Symbols: | NagB/RpiA/CoA transferase-like superfamily protein | chr1:28803033-28804703 REVERSE LENGTH=354	1	3	3	3	2	2	3	3	3	2	3	2	2	2	3	3	3	2	3	2	2	2	3	3	3	2	3	2	9.3	9.3	9.3	39.558	354	354	1	20	0	16.612	By matching	By matching	By matching	By matching	By matching	By MS/MS
AT1G76810.1;AT1G76720.1	AT1G76810.1	7;3	7;3	7;3	>AT1G76810.1 | Symbols: | eukaryotic translation initiation factor 2 (eIF-2) family protein | chr1:28831366-28836310 REVERSE LENGTH=1294	2	7	7	7	6	1	7	7	7	7	6	7	6	1	7	7	7	7	6	7	6	1	7	7	7	7	6	7	6.3	6.3	6.3	142.11	1294	1294;1191	1	48	0	43.449	By MS/MS	By matching	By MS/MS	By MS/MS	By MS/MS	By MS/MS
AT1G76880.1	AT1G76880.1	2	2	2	>AT1G76880.1 | Symbols: | Duplicated homeodomain-like superfamily protein | chr1:28865594-28867931 FORWARD LENGTH=603	1	2	2	2	1	0	1	2	2	2	2	2	1	0	1	2	2	2	2	2	1	0	1	2	2	2	2	2	3.3	3.3	3.3	67.878	603	603	1	14	0	13.351	By matching	By matching	By matching	By matching	By MS/MS	By MS/MS
AT1G77180.3;AT1G77180.2;AT1G77180.1	AT1G77180.3;AT1G77180.2;AT1G77180.1	3;3;3	3;3;3	3;3;3	>AT1G77180.3 | Symbols: SKIP | chromatin protein family | chr1:28999791-29001632 REVERSE LENGTH=511;>AT1G77180.2 | Symbols: SKIP | chromatin protein family | chr1:28999791-29001632 REVERSE LENGTH=613;>AT1G77180.1 | Symbols: SKIP | chromatin protein family	3	3	3	3	3	2	2	2	3	2	3	3	3	2	2	2	3	2	3	3	3	2	2	2	3	2	3	3	6.3	6.3	6.3	57.726	511	511;613;613	1	20	0	20.42	By MS/MS	By MS/MS	By matching	By MS/MS	By MS/MS	By MS/MS
AT1G78060.1	AT1G78060.1	13	13	13	>AT1G78060.1 | Symbols: | Glycosyl hydrolase family protein | chr1:29349796-29352868 REVERSE LENGTH=767	1	13	13	13	11	10	13	11	11	10	10	9	11	10	13	11	11	10	10	9	11	10	13	11	11	10	10	9	20.1	20.1	20.1	83.891	767	767	1	91	0	87.595	By MS/MS	By MS/MS	By MS/MS	By MS/MS	By MS/MS	By MS/MS
AT1G78820.1	AT1G78820.1	6	3	3	>AT1G78820.1 | Symbols: | D-mannose binding lectin protein with Apple-like carbohydrate-binding domain | chr1:29634401-29635768 REVERSE LENGTH=455	1	6	3	3	6	4	6	6	6	5	5	6	3	2	3	3	3	2	2	3	3	2	3	3	3	2	2	3	22.4	12.1	12.1	50.594	455	455	1	21	0	29.459	By MS/MS	By MS/MS	By MS/MS	By MS/MS	By MS/MS	By MS/MS
AT1G78830.1	AT1G78830.1	9	9	6	>AT1G78830.1 | Symbols: | Curculin-like (mannose-binding) lectin family protein | chr1:29637141-29638508 REVERSE LENGTH=455	1	9	9	6	9	8	9	9	8	9	7	8	9	8	9	9	8	9	7	8	6	6	6	6	5	6	4	5	29.2	29.2	18.9	50.342	455	455	1	75	0	148.34	By MS/MS	By MS/MS	By MS/MS	By MS/MS	By MS/MS	By MS/MS
AT1G78850.1;AT1G78860.1	AT1G78850.1	13;6	13;6	13;6	>AT1G78850.1 | Symbols: | D-mannose binding lectin protein with Apple-like carbohydrate-binding domain | chr1:29642072-29643397 REVERSE LENGTH=441	2	13	13	13	11	10	13	10	9	10	11	11	11	10	13	10	9	10	11	11	11	10	13	10	9	10	11	11	32.4	32.4	32.4	49.051	441	441;443	1	107	0	178.27	By MS/MS	By MS/MS	By MS/MS	By MS/MS	By MS/MS	By MS/MS
AT1G80030.3;AT1G80030.2;AT1G80030.1	AT1G80030.3;AT1G80030.2;AT1G80030.1	5;5;5	5;5;5	5;5;5	>AT1G80030.3 | Symbols: | Molecular chaperone Hsp40/DnaJ family protein | chr1:30105398-30108873 REVERSE LENGTH=500;>AT1G80030.2 | Symbols: | Molecular chaperone Hsp40/DnaJ family protein | chr1:30105398-30108873 REVERSE LENGTH=500;>AT1G80030.1 | Symbols	3	5	5	5	4	4	4	4	4	4	4	5	4	4	4	4	4	4	4	5	4	4	4	4	4	4	4	5	11.8	11.8	11.8	53.82	500	500;500;500	1	33	0	29.543	By MS/MS	By MS/MS	By MS/MS	By MS/MS	By MS/MS	By MS/MS
AT1G80070.1;AT4G38780.1	AT1G80070.1;AT4G38780.1	5;3	5;3	5;3	>AT1G80070.1 | Symbols: SUS2, EMB33, EMB177, EMB14 | Pre-mRNA-processing-splicing factor | chr1:30118052-30127574 FORWARD LENGTH=2359;>AT4G38780.1 | Symbols: | Pre-mRNA-processing-splicing factor | chr4:18101438-18111029 REVERSE LENGTH=2332	2	5	5	5	5	3	5	5	1	3	2	2	5	3	5	5	1	3	2	2	5	3	5	5	1	3	2	2	2.8	2.8	2.8	275.42	2359	2359;2332	1	26	0	28.647	By MS/MS	By MS/MS	By MS/MS	By MS/MS	By matching	By matching
AT1G80410.1;AT1G80410.2	AT1G80410.1;AT1G80410.2	16;16	16;16	16;16	>AT1G80410.1 | Symbols: EMB2753 | tetratricopeptide repeat (TPR)-containing protein | chr1:30227963-30234832 REVERSE LENGTH=897;>AT1G80410.2 | Symbols: EMB2753 | tetratricopeptide repeat (TPR)-containing protein | chr1:30227779-30234832 REVERSE LENGTH=911	2	16	16	16	13	13	13	14	13	13	9	11	13	13	13	14	13	13	9	11	13	13	13	14	13	13	9	11	21.5	21.5	21.5	102.15	897	897;911	1	121	0	130.24	By MS/MS	By MS/MS	By MS/MS	By MS/MS	By MS/MS	By MS/MS
AT2G01140.1	AT2G01140.1	6	4	4	>AT2G01140.1 | Symbols: | Aldolase superfamily protein | chr2:95006-96491 REVERSE LENGTH=391	1	6	4	4	5	5	6	5	4	4	5	5	3	3	4	3	2	2	3	3	3	3	4	3	2	2	3	3	16.1	11.8	11.8	42.327	391	391	1	30	0	26.418	By MS/MS	By MS/MS	By MS/MS	By MS/MS	By MS/MS	By MS/MS
AT2G01720.1	AT2G01720.1	2	2	2	>AT2G01720.1 | Symbols: | Ribophorin I | chr2:317193-320016 REVERSE LENGTH=464	1	2	2	2	1	2	2	2	2	2	2	2	1	2	2	2	2	2	2	2	1	2	2	2	2	2	2	2	4.7	4.7	4.7	52.218	464	464	1	15	0	12.663	By MS/MS	By MS/MS	By MS/MS	By MS/MS	By MS/MS	By matching
AT2G02740.2;AT2G02740.1	AT2G02740.2;AT2G02740.1	5;5	4;4	4;4	>AT2G02740.2 | Symbols: ATWHY3, PTAC11, WHY3 | ssDNA-binding transcriptional regulator | chr2:769389-770993 FORWARD LENGTH=267;>AT2G02740.1 | Symbols: ATWHY3, PTAC11, WHY3 | ssDNA-binding transcriptional regulator | chr2:769389-770993 FORWARD LENGTH=268	2	5	4	4	4	4	4	4	4	5	5	4	3	3	3	3	3	4	4	3	3	3	3	3	3	4	4	3	22.8	19.5	19.5	29.64	267	267;268	1	26	0	29.163	By MS/MS	By MS/MS	By MS/MS	By MS/MS	By MS/MS	By MS/MS
AT2G04530.1	AT2G04530.1	4	4	4	>AT2G04530.1 | Symbols: CPZ, TRZ2 | Metallo-hydrolase/oxidoreductase superfamily protein | chr2:1576808-1578611 FORWARD LENGTH=354	1	4	4	4	4	4	3	3	4	4	4	4	4	4	3	3	4	4	4	4	4	4	3	3	4	4	4	4	10.2	10.2	10.2	39.951	354	354	1	45	0	26.78	By MS/MS	By MS/MS	By matching	By MS/MS	By MS/MS	By MS/MS
AT2G04842.1	AT2G04842.1	13	13	13	>AT2G04842.1 | Symbols: EMB2761 | threonyl-tRNA synthetase, putative / threonine--tRNA ligase, putative | chr2:1698466-1701271 REVERSE LENGTH=650	1	13	13	13	11	10	12	12	9	8	9	10	11	10	12	12	9	8	9	10	11	10	12	12	9	8	9	10	21.8	21.8	21.8	74.784	650	650	1	82	0	89.343	By MS/MS	By MS/MS	By MS/MS	By MS/MS	By MS/MS	By MS/MS
AT2G05100.1;AT2G05070.1;AT3G27690.1;AT2G34430.1	AT2G05100.1;AT2G05070.1;AT3G27690.1;AT2G34430.1	4;4;4;2	4;4;4;2	2;2;2;0	>AT2G05100.1 | Symbols: LHCB2.1, LHCB2 | photosystem II light harvesting complex gene 2.1 | chr2:1823449-1824331 REVERSE LENGTH=265;>AT2G05070.1 | Symbols: LHCB2.2, LHCB2 | photosystem II light harvesting complex gene 2.2 | chr2:1799436-1800329 REVERSE LEN	4	4	4	2	4	2	2	2	2	2	2	2	4	2	2	2	2	2	2	2	2	0	0	0	0	0	0	0	11.3	11.3	5.3	28.649	265	265;265;266;266	1	25	0	43.625	By MS/MS	By MS/MS	By MS/MS	By MS/MS	By MS/MS	By MS/MS
AT2G05920.1	AT2G05920.1	11	11	11	>AT2G05920.1 | Symbols: | Subtilase family protein | chr2:2269831-2272207 REVERSE LENGTH=754	1	11	11	11	10	9	9	9	9	11	10	10	10	9	9	9	9	11	10	10	10	9	9	9	9	11	10	10	20.6	20.6	20.6	80.014	754	754	1	102	0	103.08	By MS/MS	By MS/MS	By MS/MS	By MS/MS	By MS/MS	By MS/MS
AT2G06850.1;AT5G13870.1	AT2G06850.1	16;3	16;3	16;3	>AT2G06850.1 | Symbols: EXGT-A1, EXT, XTH4 | xyloglucan endotransglucosylase/hydrolase 4 | chr2:2763619-2765490 FORWARD LENGTH=296	2	16	16	16	16	15	16	15	12	13	12	14	16	15	16	15	12	13	12	14	16	15	16	15	12	13	12	14	54.7	54.7	54.7	34.291	296	296;293	1	167	0	178.79	By MS/MS	By MS/MS	By MS/MS	By MS/MS	By MS/MS	By MS/MS
ATMG01190.1;AT2G07698.1	ATMG01190.1;AT2G07698.1	6;6	6;6	6;6	>ATMG01190.1 | Symbols: ATP1 | ATP synthase subunit 1 | chrM:302166-303689 REVERSE LENGTH=507;>AT2G07698.1 | Symbols: | ATPase, F1 complex, alpha subunit protein | chr2:3361474-3364028 FORWARD LENGTH=777	2	6	6	6	6	4	3	3	2	2	2	2	6	4	3	3	2	2	2	2	6	4	3	3	2	2	2	2	13.6	13.6	13.6	54.971	507	507;777	1	30	0	38.554	By MS/MS	By MS/MS	By MS/MS	By MS/MS	By MS/MS	By MS/MS
AT2G10940.2;AT2G10940.1	AT2G10940.2;AT2G10940.1	3;3	3;3	3;3	>AT2G10940.2 | Symbols: | Bifunctional inhibitor/lipid-transfer protein/seed storage 2S albumin superfamily protein | chr2:4311160-4312035 REVERSE LENGTH=291;>AT2G10940.1 | Symbols: | Bifunctional inhibitor/lipid-transfer protein/seed storage 2S albumin	2	3	3	3	3	3	3	3	3	3	2	3	3	3	3	3	3	3	2	3	3	3	3	3	3	3	2	3	11	11	11	29.648	291	291;291	1	23	0	27.791	By MS/MS	By MS/MS	By matching	By MS/MS	By MS/MS	By MS/MS
AT2G15430.1	AT2G15430.1	2	2	2	>AT2G15430.1 | Symbols: RBP36A, RPB35.5A, NRPB3, NRPD3, NRPE3A | DNA-directed RNA polymerase family protein | chr2:6733661-6735482 FORWARD LENGTH=319	1	2	2	2	2	2	2	2	1	2	2	2	2	2	2	2	1	2	2	2	2	2	2	2	1	2	2	2	6	6	6	35.461	319	319	1	15	0.0012642	11.096	By MS/MS	By matching	By matching	By matching	By matching	By matching
AT2G16430.2;AT2G16430.1	AT2G16430.2;AT2G16430.1	4;3	4;3	4;3	>AT2G16430.2 | Symbols: PAP10, ATPAP10 | purple acid phosphatase 10 | chr2:7120502-7122772 REVERSE LENGTH=468;>AT2G16430.1 | Symbols: PAP10, ATPAP10 | purple acid phosphatase 10 | chr2:7120502-7122020 REVERSE LENGTH=348	2	4	4	4	2	0	1	2	3	3	4	4	2	0	1	2	3	3	4	4	2	0	1	2	3	3	4	4	10.7	10.7	10.7	54.218	468	468;348	1	19	0	23.778	By matching	By matching	By matching	By matching	By MS/MS	By matching
AT2G17630.1	AT2G17630.1	10	10	5	>AT2G17630.1 | Symbols: | Pyridoxal phosphate (PLP)-dependent transferases superfamily protein | chr2:7666637-7667905 FORWARD LENGTH=422	1	10	10	5	6	5	10	6	6	5	5	5	6	5	10	6	6	5	5	5	2	1	5	2	2	1	2	1	29.6	29.6	16.1	46.633	422	422	1	48	0	67.718	By MS/MS	By MS/MS	By MS/MS	By MS/MS	By MS/MS	By MS/MS
AT2G18510.1	AT2G18510.1	4	4	4	>AT2G18510.1 | Symbols: emb2444 | RNA-binding (RRM/RBD/RNP motifs) family protein | chr2:8031554-8033517 REVERSE LENGTH=363	1	4	4	4	4	3	4	3	3	3	4	3	4	3	4	3	3	3	4	3	4	3	4	3	3	3	4	3	14.3	14.3	14.3	39.888	363	363	1	27	0	36.524	By MS/MS	By MS/MS	By MS/MS	By MS/MS	By MS/MS	By MS/MS
AT2G18740.2;AT4G30330.1;AT2G18740.1	AT2G18740.2;AT4G30330.1;AT2G18740.1	2;2;2	2;2;2	2;2;2	>AT2G18740.2 | Symbols: | Small nuclear ribonucleoprotein family protein | chr2:8123334-8124581 FORWARD LENGTH=78;>AT4G30330.1 | Symbols: | Small nuclear ribonucleoprotein family protein | chr4:14836773-14837919 REVERSE LENGTH=88;>AT2G18740.1 | Symbols:	3	2	2	2	2	1	2	2	2	2	2	2	2	1	2	2	2	2	2	2	2	1	2	2	2	2	2	2	25.6	25.6	25.6	9.2547	78	78;88;88	1	23	0	13.786	By MS/MS	By MS/MS	By MS/MS	By MS/MS	By MS/MS	By MS/MS
AT4G30190.1;AT2G18960.1;AT4G30190.2;AT1G80660.2;AT1G17260.1;AT3G42640.1;AT5G57350.2;AT5G57350.1;AT2G07560.1;AT1G80660.1;AT5G62670.1;AT3G47950.1	AT4G30190.1;AT2G18960.1;AT4G30190.2;AT1G80660.2;AT1G17260.1;AT3G42640.1;AT5G57350.2;AT5G57350.1;AT2G07560.1;AT1G80660.1;AT5G62670.1;AT3G47950.1	2;2;2;1;1;1;1;1;1;1;1;1	2;2;2;1;1;1;1;1;1;1;1;1	2;2;2;1;1;1;1;1;1;1;1;1	>AT4G30190.1 | Symbols: AHA2, PMA2, HA2 | H(+)-ATPase 2 | chr4:14770820-14775920 REVERSE LENGTH=948;>AT2G18960.1 | Symbols: AHA1, PMA, OST2, HA1 | H(+)-ATPase 1 | chr2:8221858-8227268 FORWARD LENGTH=949;>AT4G30190.2 | Symbols: HA2 | H(+)-ATPase 2 | chr4:14	12	2	2	2	2	2	2	1	2	1	2	1	2	2	2	1	2	1	2	1	2	2	2	1	2	1	2	1	2.5	2.5	2.5	104.4	948	948;949;981;945;947;948;949;949;949;954;956;960	1	13	0	12.239	By MS/MS	By matching	By MS/MS	By matching	By matching	By matching
AT2G18980.1;AT4G30170.1	AT2G18980.1	4;1	4;1	4;1	>AT2G18980.1 | Symbols: | Peroxidase superfamily protein | chr2:8233419-8235294 REVERSE LENGTH=323	2	4	4	4	4	1	4	2	1	2	1	2	4	1	4	2	1	2	1	2	4	1	4	2	1	2	1	2	14.6	14.6	14.6	35.832	323	323;325	1	17	0	25.44	By MS/MS	By matching	By MS/MS	By MS/MS	By matching	By MS/MS
AT2G19470.1	AT2G19470.1	6	4	4	>AT2G19470.1 | Symbols: ckl5 | casein kinase I-like 5 | chr2:8433851-8436295 REVERSE LENGTH=433	1	6	4	4	5	3	4	5	6	3	4	4	3	2	2	3	4	2	2	3	3	2	2	3	4	2	2	3	16.2	11.3	11.3	48.92	433	433	1	21	0	23.746	By matching	By MS/MS	By matching	By matching	By MS/MS	By MS/MS
AT2G19480.3;AT2G19480.2;AT2G19480.1;AT5G56950.1	AT2G19480.3;AT2G19480.2;AT2G19480.1	9;9;9;2	9;9;9;2	8;8;8;1	>AT2G19480.3 | Symbols: NAP1;2 | nucleosome assembly protein 1;2 | chr2:8438601-8441040 FORWARD LENGTH=372;>AT2G19480.2 | Symbols: NFA02, NFA2, NAP1;2 | nucleosome assembly protein 1;2 | chr2:8438601-8441040 FORWARD LENGTH=373;>AT2G19480.1 | Symbols: NFA02	4	9	9	8	7	7	7	8	7	9	8	9	7	7	7	8	7	9	8	9	6	6	6	7	7	8	8	8	28	28	25.8	42.846	372	372;373;379;374	1	81	0	103	By MS/MS	By MS/MS	By MS/MS	By MS/MS	By MS/MS	By MS/MS
AT2G19520.1;AT4G29730.1	AT2G19520.1	7;1	7;1	7;1	>AT2G19520.1 | Symbols: FVE, ACG1, MSI4, NFC4, NFC04, ATMSI4 | Transducin family protein / WD-40 repeat family protein | chr2:8456006-8459235 FORWARD LENGTH=507	2	7	7	7	7	7	7	7	7	7	6	7	7	7	7	7	7	7	6	7	7	7	7	7	7	7	6	7	22.3	22.3	22.3	55.758	507	507;487	1	69	0	144.37	By MS/MS	By MS/MS	By MS/MS	By MS/MS	By MS/MS	By MS/MS
AT2G19730.3;AT2G19730.2;AT2G19730.1	AT2G19730.3;AT2G19730.2;AT2G19730.1	2;2;2	2;2;2	2;2;2	>AT2G19730.3 | Symbols: | Ribosomal L28e protein family | chr2:8511752-8512995 FORWARD LENGTH=143;>AT2G19730.2 | Symbols: | Ribosomal L28e protein family | chr2:8511752-8512995 FORWARD LENGTH=143;>AT2G19730.1 | Symbols: | Ribosomal L28e protein family |	3	2	2	2	2	1	1	0	1	2	2	1	2	1	1	0	1	2	2	1	2	1	1	0	1	2	2	1	24.5	24.5	24.5	15.895	143	143;143;143	1	10	0	14.253	By MS/MS	By matching	By matching	By matching	By matching	By MS/MS
AT2G19870.1	AT2G19870.1	2	2	2	>AT2G19870.1 | Symbols: | tRNA/rRNA methyltransferase (SpoU) family protein | chr2:8576034-8577803 FORWARD LENGTH=589	1	2	2	2	1	2	0	2	2	2	2	2	1	2	0	2	2	2	2	2	1	2	0	2	2	2	2	2	3.9	3.9	3.9	65.559	589	589	1	13	0	12.386	By matching	By matching	By matching	By matching	By MS/MS	By MS/MS
AT2G20280.1	AT2G20280.1	3	3	3	>AT2G20280.1 | Symbols: | Zinc finger C-x8-C-x5-C-x3-H type family protein | chr2:8740054-8742349 REVERSE LENGTH=371	1	3	3	3	3	3	3	3	3	3	2	3	3	3	3	3	3	3	2	3	3	3	3	3	3	3	2	3	8.4	8.4	8.4	42.389	371	371	1	23	0	18.082	By MS/MS	By matching	By MS/MS	By MS/MS	By MS/MS	By MS/MS
AT2G20990.1;AT2G20990.2;AT2G20990.3;AT2G21010.1	AT2G20990.1;AT2G20990.2;AT2G20990.3	10;10;10;2	10;10;10;2	10;10;10;2	>AT2G20990.1 | Symbols: SYTA, NTMC2TYPE1.1, ATSYTA, NTMC2T1.1, SYT1 | synaptotagmin A | chr2:9014827-9017829 FORWARD LENGTH=541;>AT2G20990.2 | Symbols: SYTA | synaptotagmin A | chr2:9014827-9017829 FORWARD LENGTH=565;>AT2G20990.3 | Symbols: SYTA | synaptot	4	10	10	10	7	4	9	7	6	4	5	8	7	4	9	7	6	4	5	8	7	4	9	7	6	4	5	8	24.4	24.4	24.4	61.743	541	541;565;579;256	1	50	0	68.324	By MS/MS	By matching	By MS/MS	By MS/MS	By MS/MS	By MS/MS
AT2G21330.1;AT2G21330.3;AT2G21330.2	AT2G21330.1;AT2G21330.3;AT2G21330.2	11;10;7	4;4;3	4;4;3	>AT2G21330.1 | Symbols: FBA1 | fructose-bisphosphate aldolase 1 | chr2:9128416-9130152 REVERSE LENGTH=399;>AT2G21330.3 | Symbols: FBA1 | fructose-bisphosphate aldolase 1 | chr2:9128416-9130152 REVERSE LENGTH=389;>AT2G21330.2 | Symbols: FBA1 | fructose-bisp	3	11	4	4	11	11	10	8	10	9	9	9	4	4	4	3	4	4	4	4	4	4	4	3	4	4	4	4	34.6	15.5	15.5	42.93	399	399;389;311	1	32	0	83.024	By MS/MS	By MS/MS	By MS/MS	By MS/MS	By MS/MS	By MS/MS
AT2G21390.1;AT1G62020.1	AT2G21390.1;AT1G62020.1	7;5	7;5	7;5	>AT2G21390.1 | Symbols: | Coatomer, alpha subunit | chr2:9152428-9156577 FORWARD LENGTH=1218;>AT1G62020.1 | Symbols: | Coatomer, alpha subunit | chr1:22919814-22923728 FORWARD LENGTH=1216	2	7	7	7	6	5	7	6	4	4	7	6	6	5	7	6	4	4	7	6	6	5	7	6	4	4	7	6	6.4	6.4	6.4	136.47	1218	1218;1216	1	45	0	44.198	By MS/MS	By MS/MS	By MS/MS	By MS/MS	By MS/MS	By MS/MS
AT2G21660.1;AT2G21660.2	AT2G21660.1;AT2G21660.2	4;3	4;3	3;2	>AT2G21660.1 | Symbols: ATGRP7, CCR2, GR-RBP7, GRP7 | cold, circadian rhythm, and rna binding 2 | chr2:9265477-9266316 REVERSE LENGTH=176;>AT2G21660.2 | Symbols: ATGRP7, CCR2 | cold, circadian rhythm, and rna binding 2 | chr2:9265477-9266316 REVERSE LENGTH	2	4	4	3	4	4	3	3	3	4	4	4	4	4	3	3	3	4	4	4	3	3	2	2	2	3	3	3	32.4	32.4	26.1	16.89	176	176;159	1	36	0	75.009	By MS/MS	By MS/MS	By MS/MS	By MS/MS	By MS/MS	By MS/MS
AT2G22360.1	AT2G22360.1	7	7	6	>AT2G22360.1 | Symbols: | DNAJ heat shock family protein | chr2:9498162-9500459 FORWARD LENGTH=442	1	7	7	6	7	2	5	5	6	6	6	6	7	2	5	5	6	6	6	6	6	1	4	4	5	5	5	5	18.3	18.3	14.9	47.761	442	442	1	53	0	70.967	By MS/MS	By MS/MS	By MS/MS	By MS/MS	By MS/MS	By MS/MS
AT2G22870.1	AT2G22870.1	4	4	4	>AT2G22870.1 | Symbols: EMB2001 | P-loop containing nucleoside triphosphate hydrolases superfamily protein | chr2:9739476-9740921 FORWARD LENGTH=300	1	4	4	4	4	3	3	3	4	4	4	4	4	3	3	3	4	4	4	4	4	3	3	3	4	4	4	4	16.3	16.3	16.3	33.692	300	300	1	43	0	24.534	By MS/MS	By MS/MS	By MS/MS	By MS/MS	By MS/MS	By MS/MS
AT2G23070.1	AT2G23070.1	6	6	3	>AT2G23070.1 | Symbols: | Protein kinase superfamily protein | chr2:9824162-9826871 REVERSE LENGTH=432	1	6	6	3	5	2	6	6	3	4	5	3	5	2	6	6	3	4	5	3	3	1	3	3	2	2	3	1	17.6	17.6	8.3	50.236	432	432	1	34	0	39.71	By MS/MS	By MS/MS	By MS/MS	By MS/MS	By MS/MS	By MS/MS
AT2G23350.1	AT2G23350.1	2	2	2	>AT2G23350.1 | Symbols: PAB4, PABP4 | poly(A) binding protein 4 | chr2:9943209-9946041 FORWARD LENGTH=662	1	2	2	2	2	1	2	1	2	2	2	2	2	1	2	1	2	2	2	2	2	1	2	1	2	2	2	2	3.3	3.3	3.3	71.652	662	662	1	14	0	13.746	By MS/MS	By matching	By matching	By matching	By MS/MS	By MS/MS
AT2G23420.1;AT4G36940.1	AT2G23420.1;AT4G36940.1	2;1	2;1	2;1	>AT2G23420.1 | Symbols: NAPRT2 | nicotinate phosphoribosyltransferase 2 | chr2:9971819-9974909 FORWARD LENGTH=557;>AT4G36940.1 | Symbols: NAPRT1 | nicotinate phosphoribosyltransferase 1 | chr4:17416938-17419883 FORWARD LENGTH=559	2	2	2	2	1	1	2	1	2	2	1	2	1	1	2	1	2	2	1	2	1	1	2	1	2	2	1	2	4.1	4.1	4.1	62.273	557	557;559	1	12	0	11.446	By matching	By matching	By matching	By matching	By MS/MS	By MS/MS
AT2G24280.1	AT2G24280.1	12	12	12	>AT2G24280.1 | Symbols: | alpha/beta-Hydrolases superfamily protein | chr2:10334622-10336927 FORWARD LENGTH=494	1	12	12	12	11	9	10	9	10	8	8	10	11	9	10	9	10	8	8	10	11	9	10	9	10	8	8	10	26.5	26.5	26.5	56.232	494	494	1	99	0	250.89	By MS/MS	By MS/MS	By MS/MS	By MS/MS	By MS/MS	By MS/MS
AT2G24420.2;AT2G24420.1	AT2G24420.2;AT2G24420.1	7;7	7;7	7;7	>AT2G24420.2 | Symbols: | DNA repair ATPase-related | chr2:10380147-10382624 FORWARD LENGTH=440;>AT2G24420.1 | Symbols: | DNA repair ATPase-related | chr2:10380147-10382624 FORWARD LENGTH=440	2	7	7	7	4	4	5	6	5	4	4	7	4	4	5	6	5	4	4	7	4	4	5	6	5	4	4	7	17.3	17.3	17.3	50.351	440	440;440	1	39	0	44.528	By MS/MS	By MS/MS	By MS/MS	By MS/MS	By MS/MS	By MS/MS
AT2G25110.1	AT2G25110.1	5	5	5	>AT2G25110.1 | Symbols: SDF2, ATSDL, AtSDF2 | stromal cell-derived factor 2-like protein precursor | chr2:10684428-10685838 FORWARD LENGTH=218	1	5	5	5	5	1	5	4	5	2	4	3	5	1	5	4	5	2	4	3	5	1	5	4	5	2	4	3	31.2	31.2	31.2	23.935	218	218	1	31	0	38.14	By MS/MS	By matching	By MS/MS	By MS/MS	By MS/MS	By MS/MS
AT2G27100.1	AT2G27100.1	3	3	3	>AT2G27100.1 | Symbols: SE | C2H2 zinc-finger protein SERRATE (SE) | chr2:11572587-11576357 FORWARD LENGTH=720	1	3	3	3	3	1	3	2	3	2	2	2	3	1	3	2	3	2	2	2	3	1	3	2	3	2	2	2	5.7	5.7	5.7	81.097	720	720	1	18	0	19.298	By MS/MS	By matching	By MS/MS	By MS/MS	By MS/MS	By MS/MS
AT2G27170.2;AT2G27170.1	AT2G27170.2;AT2G27170.1	10;10	10;10	10;10	>AT2G27170.2 | Symbols: TTN7, SMC3 | Structural maintenance of chromosomes (SMC) family protein | chr2:11609319-11617064 REVERSE LENGTH=1204;>AT2G27170.1 | Symbols: TTN7, SMC3 | Structural maintenance of chromosomes (SMC) family protein | chr2:11609319-116	2	10	10	10	10	3	6	9	7	4	8	8	10	3	6	9	7	4	8	8	10	3	6	9	7	4	8	8	9	9	9	139.37	1204	1204;1204	1	55	0	64.463	By MS/MS	By MS/MS	By MS/MS	By MS/MS	By MS/MS	By matching
AT2G28000.1	AT2G28000.1	15	15	15	>AT2G28000.1 | Symbols: CPN60A, CH-CPN60A, SLP | chaperonin-60alpha | chr2:11926603-11929184 FORWARD LENGTH=586	1	15	15	15	13	6	9	11	9	8	7	8	13	6	9	11	9	8	7	8	13	6	9	11	9	8	7	8	30	30	30	62.071	586	586	1	72	0	116.41	By MS/MS	By MS/MS	By MS/MS	By MS/MS	By MS/MS	By MS/MS
AT2G28800.4;AT2G28800.1	AT2G28800.4;AT2G28800.1	2;2	2;2	2;2	>AT2G28800.4 | Symbols: ALB3 | 63 kDa inner membrane family protein | chr2:12356669-12359158 REVERSE LENGTH=432;>AT2G28800.1 | Symbols: ALB3 | 63 kDa inner membrane family protein | chr2:12356669-12359158 REVERSE LENGTH=462	2	2	2	2	2	1	2	2	2	0	1	0	2	1	2	2	2	0	1	0	2	1	2	2	2	0	1	0	6.9	6.9	6.9	47.071	432	432;462	1	10	0	13.09	By MS/MS	By MS/MS	By MS/MS	By MS/MS	By MS/MS	By matching
AT2G30950.1;AT1G06430.1	AT2G30950.1;AT1G06430.1	4;3	4;3	4;3	>AT2G30950.1 | Symbols: VAR2, FTSH2 | FtsH extracellular protease family | chr2:13174692-13177064 FORWARD LENGTH=695;>AT1G06430.1 | Symbols: FTSH8 | FTSH protease 8 | chr1:1960214-1962525 REVERSE LENGTH=685	2	4	4	4	4	0	2	2	0	0	0	0	4	0	2	2	0	0	0	0	4	0	2	2	0	0	0	0	7.2	7.2	7.2	74.157	695	695;685	1	8	0	23.962	By MS/MS	By matching	By matching	By matching	By matching	By matching
AT3G53870.1;AT2G31610.1;AT5G35530.1	AT3G53870.1;AT2G31610.1;AT5G35530.1	4;4;3	4;4;3	4;4;3	>AT3G53870.1 | Symbols: | Ribosomal protein S3 family protein | chr3:19951547-19952782 FORWARD LENGTH=249;>AT2G31610.1 | Symbols: | Ribosomal protein S3 family protein | chr2:13450384-13451669 FORWARD LENGTH=250;>AT5G35530.1 | Symbols: | Ribosomal prote	3	4	4	4	3	2	1	2	2	1	1	2	3	2	1	2	2	1	1	2	3	2	1	2	2	1	1	2	20.5	20.5	20.5	27.349	249	249;250;248	1	14	0	30.078	By MS/MS	By MS/MS	By MS/MS	By MS/MS	By MS/MS	By MS/MS
AT2G31810.3;AT2G31810.1;AT2G31810.2	AT2G31810.3;AT2G31810.1;AT2G31810.2	5;5;4	5;5;4	5;5;4	>AT2G31810.3 | Symbols: | ACT domain-containing small subunit of acetolactate synthase protein | chr2:13524271-13528246 FORWARD LENGTH=469;>AT2G31810.1 | Symbols: | ACT domain-containing small subunit of acetolactate synthase protein | chr2:13524271-1352	3	5	5	5	5	3	5	5	4	2	3	4	5	3	5	5	4	2	3	4	5	3	5	5	4	2	3	4	13.2	13.2	13.2	51.412	469	469;491;421	1	31	0	34.541	By MS/MS	By MS/MS	By MS/MS	By MS/MS	By MS/MS	By MS/MS
AT2G32230.1	AT2G32230.1	13	13	13	>AT2G32230.1 | Symbols: PRORP1 | proteinaceous RNase P 1 | chr2:13679608-13681756 REVERSE LENGTH=572	1	13	13	13	13	12	12	12	13	13	10	12	13	12	12	12	13	13	10	12	13	12	12	12	13	13	10	12	25.9	25.9	25.9	64.876	572	572	1	100	0	219.02	By MS/MS	By MS/MS	By MS/MS	By MS/MS	By MS/MS	By MS/MS
AT2G32600.1	AT2G32600.1	2	2	2	>AT2G32600.1 | Symbols: | hydroxyproline-rich glycoprotein family protein | chr2:13833779-13835525 REVERSE LENGTH=277	1	2	2	2	2	2	2	1	2	2	2	2	2	2	2	1	2	2	2	2	2	2	2	1	2	2	2	2	9.7	9.7	9.7	31.369	277	277	1	15	0	12.656	By MS/MS	By matching	By matching	By matching	By MS/MS	By MS/MS
AT2G32920.1	AT2G32920.1	6	6	6	>AT2G32920.1 | Symbols: ATPDIL2-3, PDI9, ATPDI9, PDIL2-3 | PDI-like 2-3 | chr2:13962502-13965406 REVERSE LENGTH=440	1	6	6	6	6	6	5	6	6	5	6	6	6	6	5	6	6	5	6	6	6	6	5	6	6	5	6	6	17.5	17.5	17.5	47.754	440	440	1	46	0	83.218	By MS/MS	By MS/MS	By MS/MS	By MS/MS	By MS/MS	By MS/MS
AT2G33150.1	AT2G33150.1	9	9	9	>AT2G33150.1 | Symbols: PKT3, PED1, KAT2 | peroxisomal 3-ketoacyl-CoA thiolase 3 | chr2:14047814-14050983 REVERSE LENGTH=462	1	9	9	9	9	8	9	9	8	6	8	8	9	8	9	9	8	6	8	8	9	8	9	9	8	6	8	8	34.8	34.8	34.8	48.578	462	462	1	96	0	162.62	By MS/MS	By MS/MS	By MS/MS	By MS/MS	By MS/MS	By MS/MS
AT2G33340.2;AT2G33340.1;AT2G33340.3	AT2G33340.2;AT2G33340.1;AT2G33340.3	5;5;4	4;4;3	4;4;3	>AT2G33340.2 | Symbols: MAC3B | MOS4-associated complex 3B | chr2:14126584-14131000 REVERSE LENGTH=525;>AT2G33340.1 | Symbols: MAC3B | MOS4-associated complex 3B | chr2:14126584-14131000 REVERSE LENGTH=525;>AT2G33340.3 | Symbols: MAC3B | MOS4-associated	3	5	4	4	4	3	4	3	3	3	5	3	3	2	3	2	2	2	4	2	3	2	3	2	2	2	4	2	15.4	13.3	13.3	56.727	525	525;525;485	1	23	0	27.404	By MS/MS	By MS/MS	By MS/MS	By MS/MS	By MS/MS	By MS/MS
AT2G33410.1	AT2G33410.1	2	2	2	>AT2G33410.1 | Symbols: | RNA-binding (RRM/RBD/RNP motifs) family protein | chr2:14156085-14157435 FORWARD LENGTH=404	1	2	2	2	1	0	1	1	2	2	1	2	1	0	1	1	2	2	1	2	1	0	1	1	2	2	1	2	5.9	5.9	5.9	41.328	404	404	1	10	0	13.125	By matching	By matching	By matching	By matching	By MS/MS	By MS/MS
AT2G33530.1	AT2G33530.1	10	10	10	>AT2G33530.1 | Symbols: scpl46 | serine carboxypeptidase-like 46 | chr2:14197866-14200536 REVERSE LENGTH=465	1	10	10	10	10	9	9	9	9	7	8	9	10	9	9	9	9	7	8	9	10	9	9	9	9	7	8	9	29.7	29.7	29.7	51.883	465	465	1	100	0	128.41	By MS/MS	By MS/MS	By MS/MS	By MS/MS	By MS/MS	By MS/MS
AT2G33730.1	AT2G33730.1	6	6	6	>AT2G33730.1 | Symbols: | P-loop containing nucleoside triphosphate hydrolases superfamily protein | chr2:14265679-14267880 REVERSE LENGTH=733	1	6	6	6	6	6	6	6	6	4	4	5	6	6	6	6	6	4	4	5	6	6	6	6	6	4	4	5	9.8	9.8	9.8	85.276	733	733	1	43	0	60.787	By MS/MS	By MS/MS	By MS/MS	By MS/MS	By MS/MS	By MS/MS
AT2G33800.1	AT2G33800.1	7	7	7	>AT2G33800.1 | Symbols: | Ribosomal protein S5 family protein | chr2:14300925-14302352 REVERSE LENGTH=303	1	7	7	7	7	6	7	7	7	6	6	6	7	6	7	7	7	6	6	6	7	6	7	7	7	6	6	6	23.8	23.8	23.8	32.645	303	303	1	57	0	58.625	By MS/MS	By MS/MS	By MS/MS	By MS/MS	By MS/MS	By MS/MS
AT2G34040.1;AT2G34040.2;AT1G29030.1	AT2G34040.1;AT2G34040.2	12;11;2	12;11;2	12;11;2	>AT2G34040.1 | Symbols: | Apoptosis inhibitory protein 5 (API5) | chr2:14377957-14382246 REVERSE LENGTH=553;>AT2G34040.2 | Symbols: | Apoptosis inhibitory protein 5 (API5) | chr2:14378571-14382246 REVERSE LENGTH=442	3	12	12	12	9	7	11	10	8	9	8	10	9	7	11	10	8	9	8	10	9	7	11	10	8	9	8	10	24.4	24.4	24.4	61.644	553	553;442;556	1	72	0	92.398	By MS/MS	By MS/MS	By MS/MS	By MS/MS	By MS/MS	By MS/MS
AT2G34060.1	AT2G34060.1	2	2	2	>AT2G34060.1 | Symbols: | Peroxidase superfamily protein | chr2:14384914-14386530 FORWARD LENGTH=346	1	2	2	2	2	1	2	1	2	0	0	0	2	1	2	1	2	0	0	0	2	1	2	1	2	0	0	0	6.9	6.9	6.9	38.228	346	346	1	8	0	11.447	By MS/MS	By matching	By matching	By matching	By matching	By matching
AT2G34810.1;AT1G26420.1;AT1G26390.1;AT1G26380.1	AT2G34810.1	19;1;1;1	19;1;1;1	19;1;1;1	>AT2G34810.1 | Symbols: | FAD-binding Berberine family protein | chr2:14685292-14686914 FORWARD LENGTH=540	4	19	19	19	18	13	17	16	17	17	17	19	18	13	17	16	17	17	17	19	18	13	17	16	17	17	17	19	40.4	40.4	40.4	61.306	540	540;529;530;535	1	189	0	177.94	By MS/MS	By MS/MS	By MS/MS	By MS/MS	By MS/MS	By MS/MS
AT2G35410.1	AT2G35410.1	6	6	6	>AT2G35410.1 | Symbols: | RNA-binding (RRM/RBD/RNP motifs) family protein | chr2:14898341-14899590 FORWARD LENGTH=308	1	6	6	6	5	2	3	2	5	5	5	5	5	2	3	2	5	5	5	5	5	2	3	2	5	5	5	5	23.1	23.1	23.1	33.785	308	308	1	32	0	43.477	By MS/MS	By MS/MS	By matching	By MS/MS	By MS/MS	By MS/MS
AT2G36460.1;AT2G36460.2	AT2G36460.1;AT2G36460.2	14;9	8;5	8;5	>AT2G36460.1 | Symbols: | Aldolase superfamily protein | chr2:15296929-15298387 REVERSE LENGTH=358;>AT2G36460.2 | Symbols: | Aldolase superfamily protein | chr2:15296929-15297732 REVERSE LENGTH=267	2	14	8	8	11	11	14	12	12	11	13	13	5	5	8	6	6	6	7	7	5	5	8	6	6	6	7	7	47.8	24.9	24.9	38.386	358	358;267	1	61	0	70.223	By MS/MS	By MS/MS	By MS/MS	By MS/MS	By MS/MS	By MS/MS
AT2G37220.1	AT2G37220.1	5	5	3	>AT2G37220.1 | Symbols: | RNA-binding (RRM/RBD/RNP motifs) family protein | chr2:15634980-15636331 REVERSE LENGTH=289	1	5	5	3	5	4	5	5	5	5	5	5	5	4	5	5	5	5	5	5	3	3	3	3	3	3	3	3	24.2	24.2	17.6	30.718	289	289	1	54	0	165.47	By MS/MS	By MS/MS	By MS/MS	By MS/MS	By MS/MS	By MS/MS
AT2G37270.2;AT2G37270.1;AT3G11940.2;AT3G11940.1	AT2G37270.2;AT2G37270.1;AT3G11940.2;AT3G11940.1	2;2;1;1	2;2;1;1	2;2;1;1	>AT2G37270.2 | Symbols: ATRPS5B, RPS5B | ribosomal protein 5B | chr2:15647883-15649042 REVERSE LENGTH=207;>AT2G37270.1 | Symbols: ATRPS5B, RPS5B | ribosomal protein 5B | chr2:15647883-15649042 REVERSE LENGTH=207;>AT3G11940.2 | Symbols: ATRPS5A, AML1, RPS5A	4	2	2	2	2	0	2	2	1	0	0	0	2	0	2	2	1	0	0	0	2	0	2	2	1	0	0	0	11.6	11.6	11.6	22.99	207	207;207;207;207	1	9	0	12.666	By MS/MS	By matching	By MS/MS	By MS/MS	By matching	By matching
AT2G38025.1	AT2G38025.1	4	4	4	>AT2G38025.1 | Symbols: | Cysteine proteinases superfamily protein | chr2:15915239-15916692 REVERSE LENGTH=234	1	4	4	4	3	3	3	2	4	3	4	4	3	3	3	2	4	3	4	4	3	3	3	2	4	3	4	4	21.8	21.8	21.8	26.273	234	234	1	26	0	31.824	By MS/MS	By matching	By MS/MS	By MS/MS	By MS/MS	By MS/MS
AT2G38040.2;AT2G38040.1	AT2G38040.2;AT2G38040.1	25;25	25;25	25;25	>AT2G38040.2 | Symbols: CAC3 | acetyl Co-enzyme a carboxylase carboxyltransferase alpha subunit | chr2:15917612-15920749 FORWARD LENGTH=769;>AT2G38040.1 | Symbols: CAC3 | acetyl Co-enzyme a carboxylase carboxyltransferase alpha subunit | chr2:15917612-1592	2	25	25	25	16	15	13	18	24	25	21	21	16	15	13	18	24	25	21	21	16	15	13	18	24	25	21	21	41.4	41.4	41.4	85.305	769	769;769	1	166	0	323.31	By MS/MS	By MS/MS	By MS/MS	By MS/MS	By MS/MS	By MS/MS
AT2G38280.2;AT2G38280.1	AT2G38280.2;AT2G38280.1	3;3	3;3	3;3	>AT2G38280.2 | Symbols: FAC1, ATAMPD | AMP deaminase, putative / myoadenylate deaminase, putative | chr2:16033767-16038793 REVERSE LENGTH=839;>AT2G38280.1 | Symbols: FAC1, ATAMPD | AMP deaminase, putative / myoadenylate deaminase, putative | chr2:16033767-	2	3	3	3	1	0	0	1	2	3	3	3	1	0	0	1	2	3	3	3	1	0	0	1	2	3	3	3	4.1	4.1	4.1	95.128	839	839;839	1	13	0	19.753	By matching	By matching	By matching	By matching	By matching	By matching
AT2G38540.1	AT2G38540.1	3	3	3	>AT2G38540.1 | Symbols: LP1, LTP1, ATLTP1 | lipid transfer protein 1 | chr2:16130418-16130893 FORWARD LENGTH=118	1	3	3	3	3	3	3	3	3	3	3	3	3	3	3	3	3	3	3	3	3	3	3	3	3	3	3	3	26.3	26.3	26.3	11.755	118	118	1	24	0	21.983	By MS/MS	By MS/MS	By MS/MS	By MS/MS	By MS/MS	By MS/MS
AT2G39010.1	AT2G39010.1	2	2	2	>AT2G39010.1 | Symbols: PIP2E, PIP2;6 | plasma membrane intrinsic protein 2E | chr2:16291564-16293746 FORWARD LENGTH=289	1	2	2	2	1	1	2	2	0	0	0	0	1	1	2	2	0	0	0	0	1	1	2	2	0	0	0	0	7.3	7.3	7.3	31.05	289	289	1	6	0	50.647	By MS/MS	By MS/MS	By MS/MS	By MS/MS	By matching	By matching
AT2G39670.1;AT2G39670.2	AT2G39670.1;AT2G39670.2	12;11	12;11	12;11	>AT2G39670.1 | Symbols: | Radical SAM superfamily protein | chr2:16534303-16536986 FORWARD LENGTH=428;>AT2G39670.2 | Symbols: | Radical SAM superfamily protein | chr2:16534303-16536986 FORWARD LENGTH=431	2	12	12	12	7	7	2	8	11	11	10	12	7	7	2	8	11	11	10	12	7	7	2	8	11	11	10	12	40.2	40.2	40.2	47.35	428	428;431	1	86	0	214.69	By MS/MS	By MS/MS	By MS/MS	By MS/MS	By MS/MS	By MS/MS
AT2G39730.1;AT2G39730.3;AT2G39730.2	AT2G39730.1;AT2G39730.3;AT2G39730.2	18;17;17	18;17;17	18;17;17	>AT2G39730.1 | Symbols: RCA | rubisco activase | chr2:16570951-16573345 REVERSE LENGTH=474;>AT2G39730.3 | Symbols: RCA | rubisco activase | chr2:16571174-16573345 REVERSE LENGTH=441;>AT2G39730.2 | Symbols: RCA | rubisco activase | chr2:16571046-16573345 RE	3	18	18	18	18	15	16	16	14	16	16	16	18	15	16	16	14	16	16	16	18	15	16	16	14	16	16	16	53	53	53	51.981	474	474;441;446	1	176	0	323.31	By MS/MS	By MS/MS	By MS/MS	By MS/MS	By MS/MS	By MS/MS
AT2G39990.1	AT2G39990.1	2	2	2	>AT2G39990.1 | Symbols: EIF2, AteIF3f, eIF3F | eukaryotic translation initiation factor 2 | chr2:16698332-16699929 REVERSE LENGTH=293	1	2	2	2	2	1	1	2	2	1	2	1	2	1	1	2	2	1	2	1	2	1	1	2	2	1	2	1	9.6	9.6	9.6	31.862	293	293	1	12	0	26.727	By MS/MS	By matching	By matching	By MS/MS	By MS/MS	By matching
AT2G40290.1;AT2G40290.3;AT2G40290.2	AT2G40290.1;AT2G40290.3;AT2G40290.2	8;5;5	8;5;5	7;4;4	>AT2G40290.1 | Symbols: | Eukaryotic translation initiation factor 2 subunit 1 | chr2:16829030-16830889 REVERSE LENGTH=344;>AT2G40290.3 | Symbols: | Eukaryotic translation initiation factor 2 subunit 1 | chr2:16829872-16830889 REVERSE LENGTH=241;>AT2G402	3	8	8	7	7	6	8	7	6	8	7	7	7	6	8	7	6	8	7	7	6	5	7	6	5	7	6	6	32.8	32.8	30.2	38.747	344	344;241;241	1	61	0	71.933	By MS/MS	By MS/MS	By MS/MS	By MS/MS	By MS/MS	By MS/MS
AT2G40660.1	AT2G40660.1	3	3	3	>AT2G40660.1 | Symbols: | Nucleic acid-binding, OB-fold-like protein | chr2:16966011-16968866 FORWARD LENGTH=389	1	3	3	3	3	3	2	3	2	1	3	3	3	3	2	3	2	1	3	3	3	3	2	3	2	1	3	3	10.5	10.5	10.5	42.088	389	389	1	20	0	18.356	By MS/MS	By matching	By MS/MS	By MS/MS	By matching	By MS/MS
AT2G41475.1	AT2G41475.1	2	2	2	>AT2G41475.1 | Symbols: | Embryo-specific protein 3, (ATS3) | chr2:17295259-17296329 REVERSE LENGTH=179	1	2	2	2	2	2	2	2	2	2	2	2	2	2	2	2	2	2	2	2	2	2	2	2	2	2	2	2	10.6	10.6	10.6	19.949	179	179	1	16	0	11.628	By matching	By matching	By matching	By matching	By MS/MS	By matching
AT2G41810.1;AT2G41800.1	AT2G41810.1;AT2G41800.1	2;1	2;1	2;1	>AT2G41810.1 | Symbols: | Protein of unknown function, DUF642 | chr2:17439414-17441296 REVERSE LENGTH=370;>AT2G41800.1 | Symbols: | Protein of unknown function, DUF642 | chr2:17436671-17438005 REVERSE LENGTH=370	2	2	2	2	2	2	2	2	1	2	2	2	2	2	2	2	1	2	2	2	2	2	2	2	1	2	2	2	6.2	6.2	6.2	40.262	370	370;370	1	15	0	12.604	By MS/MS	By matching	By MS/MS	By matching	By matching	By matching
AT2G42520.1;AT3G58570.1	AT2G42520.1;AT3G58570.1	15;8	14;7	10;3	>AT2G42520.1 | Symbols: | P-loop containing nucleoside triphosphate hydrolases superfamily protein | chr2:17705382-17708744 FORWARD LENGTH=633;>AT3G58570.1 | Symbols: | P-loop containing nucleoside triphosphate hydrolases superfamily protein | chr3:21657	2	15	14	10	13	10	13	13	12	11	9	13	12	9	12	12	11	10	8	12	8	5	8	9	7	6	4	8	27.3	25.6	18.6	67.625	633	633;646	1	95	0	103.67	By MS/MS	By MS/MS	By MS/MS	By MS/MS	By MS/MS	By MS/MS
AT5G45775.1;AT5G45775.2;AT4G18730.1;AT3G58700.1;AT2G42740.1	AT5G45775.1;AT5G45775.2;AT4G18730.1;AT3G58700.1;AT2G42740.1	2;2;2;2;2	2;2;2;2;2	2;2;2;2;2	>AT5G45775.1 | Symbols: | Ribosomal L5P family protein | chr5:18565281-18566377 REVERSE LENGTH=172;>AT5G45775.2 | Symbols: | Ribosomal L5P family protein | chr5:18565281-18566496 REVERSE LENGTH=182;>AT4G18730.1 | Symbols: RPL16B | ribosomal protein L16B	5	2	2	2	2	1	2	1	1	1	1	2	2	1	2	1	1	1	1	2	2	1	2	1	1	1	1	2	14	14	14	19.775	172	172;182;182;182;182	1	11	0	16.335	By MS/MS	By MS/MS	By MS/MS	By MS/MS	By MS/MS	By MS/MS
AT2G42790.1;AT3G58750.1	AT2G42790.1;AT3G58750.1	2;2	2;2	2;2	>AT2G42790.1 | Symbols: CSY3 | citrate synthase 3 | chr2:17803132-17805991 REVERSE LENGTH=509;>AT3G58750.1 | Symbols: CSY2 | citrate synthase 2 | chr3:21724564-21727458 REVERSE LENGTH=514	2	2	2	2	2	1	2	2	1	1	1	1	2	1	2	2	1	1	1	1	2	1	2	2	1	1	1	1	4.7	4.7	4.7	56.175	509	509;514	1	11	0	13.604	By MS/MS	By matching	By MS/MS	By MS/MS	By matching	By matching
AT2G42910.1	AT2G42910.1	8	8	8	>AT2G42910.1 | Symbols: | Phosphoribosyltransferase family protein | chr2:17856396-17858394 FORWARD LENGTH=337	1	8	8	8	7	7	5	8	7	8	6	7	7	7	5	8	7	8	6	7	7	7	5	8	7	8	6	7	31.5	31.5	31.5	37.56	337	337	1	63	0	57.186	By MS/MS	By MS/MS	By MS/MS	By MS/MS	By MS/MS	By MS/MS
AT2G43030.1	AT2G43030.1	3	3	3	>AT2G43030.1 | Symbols: | Ribosomal protein L3 family protein | chr2:17894898-17895713 FORWARD LENGTH=271	1	3	3	3	3	0	1	1	3	3	3	3	3	0	1	1	3	3	3	3	3	0	1	1	3	3	3	3	15.5	15.5	15.5	29.363	271	271	1	19	0	28.827	By MS/MS	By matching	By matching	By matching	By MS/MS	By MS/MS
AT2G43770.1	AT2G43770.1	9	9	9	>AT2G43770.1 | Symbols: | Transducin/WD40 repeat-like superfamily protein | chr2:18134272-18135303 REVERSE LENGTH=343	1	9	9	9	7	3	6	6	8	9	9	9	7	3	6	6	8	9	9	9	7	3	6	6	8	9	9	9	31.2	31.2	31.2	37.885	343	343	1	64	0	65.746	By MS/MS	By matching	By MS/MS	By MS/MS	By MS/MS	By MS/MS
AT2G45180.1	AT2G45180.1	3	3	3	>AT2G45180.1 | Symbols: | Bifunctional inhibitor/lipid-transfer protein/seed storage 2S albumin superfamily protein | chr2:18626377-18626781 FORWARD LENGTH=134	1	3	3	3	2	0	3	2	3	2	2	3	2	0	3	2	3	2	2	3	2	0	3	2	3	2	2	3	11.2	11.2	11.2	13.955	134	134	1	17	0	19.267	By MS/MS	By matching	By MS/MS	By matching	By MS/MS	By MS/MS
AT2G45220.1	AT2G45220.1	9	9	9	>AT2G45220.1 | Symbols: | Plant invertase/pectin methylesterase inhibitor superfamily | chr2:18644281-18646394 REVERSE LENGTH=511	1	9	9	9	8	6	9	8	8	8	8	9	8	6	9	8	8	8	8	9	8	6	9	8	8	8	8	9	24.9	24.9	24.9	55.976	511	511	1	89	0	323.31	By MS/MS	By MS/MS	By MS/MS	By MS/MS	By MS/MS	By MS/MS
AT5G23600.1;AT2G45330.2;AT2G45330.1	AT5G23600.1;AT2G45330.2;AT2G45330.1	2;2;2	2;2;2	2;2;2	>AT5G23600.1 | Symbols: | RNA 2-phosphotransferase, Tpt1 / KptA family | chr5:7955994-7956632 FORWARD LENGTH=212;>AT2G45330.2 | Symbols: emb1067 | RNA 2-phosphotransferase, Tpt1 / KptA family | chr2:18686340-18687874 FORWARD LENGTH=286;>AT2G45330.1 | Sy	3	2	2	2	2	2	2	2	2	2	1	2	2	2	2	2	2	2	1	2	2	2	2	2	2	2	1	2	9.9	9.9	9.9	24.056	212	212;286;289	1	15	0	12.577	By MS/MS	By matching	By MS/MS	By MS/MS	By MS/MS	By MS/MS
AT2G45640.1;AT2G45640.2	AT2G45640.1;AT2G45640.2	4;3	4;3	4;3	>AT2G45640.1 | Symbols: SAP18, ATSAP18 | SIN3 associated polypeptide P18 | chr2:18799881-18801323 REVERSE LENGTH=152;>AT2G45640.2 | Symbols: SAP18 | SIN3 associated polypeptide P18 | chr2:18799881-18801323 REVERSE LENGTH=149	2	4	4	4	4	3	3	4	3	4	3	3	4	3	3	4	3	4	3	3	4	3	3	4	3	4	3	3	31.6	31.6	31.6	17.164	152	152;149	1	27	0	24.886	By MS/MS	By MS/MS	By MS/MS	By MS/MS	By MS/MS	By MS/MS
AT2G45740.3;AT2G45740.2;AT2G45740.1;AT3G61070.3;AT3G61070.2;AT3G61070.1;AT1G01820.1	AT2G45740.3;AT2G45740.2;AT2G45740.1;AT3G61070.3;AT3G61070.2;AT3G61070.1;AT1G01820.1	2;2;2;1;1;1;1	2;2;2;1;1;1;1	2;2;2;1;1;1;1	>AT2G45740.3 | Symbols: PEX11D | peroxin 11D | chr2:18839865-18841102 FORWARD LENGTH=236;>AT2G45740.2 | Symbols: PEX11D | peroxin 11D | chr2:18839865-18841102 FORWARD LENGTH=236;>AT2G45740.1 | Symbols: PEX11D | peroxin 11D | chr2:18839865-18841102 FORWARD	7	2	2	2	2	1	2	2	1	1	1	1	2	1	2	2	1	1	1	1	2	1	2	2	1	1	1	1	11	11	11	25.943	236	236;236;236;231;231;231;235	1	11	0	13.534	By MS/MS	By matching	By MS/MS	By MS/MS	By matching	By matching
AT2G45960.2;AT2G45960.1;AT2G45960.3	AT2G45960.2;AT2G45960.1;AT2G45960.3	5;5;5	5;5;5	2;2;2	>AT2G45960.2 | Symbols: PIP1B, TMP-A, ATHH2, PIP1;2 | plasma membrane intrinsic protein 1B | chr2:18910450-18911579 FORWARD LENGTH=274;>AT2G45960.1 | Symbols: PIP1B, TMP-A, ATHH2, PIP1;2 | plasma membrane intrinsic protein 1B | chr2:18910450-18911703 FORWA	3	5	5	2	3	2	5	4	3	3	3	3	3	2	5	4	3	3	3	3	1	0	2	1	1	1	1	1	21.9	21.9	10.2	29.132	274	274;286;301	1	40	0	42.18	By MS/MS	By MS/MS	By MS/MS	By MS/MS	By MS/MS	By MS/MS
AT2G46280.2;AT2G46280.1;AT2G46280.3	AT2G46280.2;AT2G46280.1;AT2G46280.3	6;6;4	6;6;4	4;4;3	>AT2G46280.2 | Symbols: TRIP-1, TIF3I1 | TGF-beta receptor interacting protein 1 | chr2:19003656-19005393 REVERSE LENGTH=328;>AT2G46280.1 | Symbols: TRIP-1, TIF3I1 | TGF-beta receptor interacting protein 1 | chr2:19003656-19005393 REVERSE LENGTH=328;>AT2G4	3	6	6	4	5	5	4	5	5	5	6	6	5	5	4	5	5	5	6	6	4	3	3	3	4	4	4	4	23.2	23.2	16.2	36.388	328	328;328;254	1	41	0	38.647	By MS/MS	By MS/MS	By MS/MS	By MS/MS	By MS/MS	By MS/MS
AT2G47450.1	AT2G47450.1	3	3	3	>AT2G47450.1 | Symbols: CAO, CPSRP43 | chloroplast signal recognition particle component (CAO) | chr2:19472781-19473902 FORWARD LENGTH=373	1	3	3	3	1	1	0	2	0	2	3	0	1	1	0	2	0	2	3	0	1	1	0	2	0	2	3	0	9.7	9.7	9.7	41.279	373	373	1	9	0	17.041	By MS/MS	By matching	By matching	By MS/MS	By matching	By MS/MS
AT2G47470.3;AT2G47470.1;AT2G47470.4;AT2G47470.2	AT2G47470.3;AT2G47470.1;AT2G47470.4;AT2G47470.2	6;6;5;3	6;6;5;3	6;6;5;3	>AT2G47470.3 | Symbols: ATPDIL2-1, UNE5, MEE30, PDI11, ATPDI11 | thioredoxin family protein | chr2:19481503-19483571 FORWARD LENGTH=323;>AT2G47470.1 | Symbols: ATPDIL2-1, UNE5, MEE30, PDI11, ATPDI11 | thioredoxin family protein | chr2:19481503-19483683 FOR	4	6	6	6	5	4	6	4	4	4	5	3	5	4	6	4	4	4	5	3	5	4	6	4	4	4	5	3	21.4	21.4	21.4	35.62	323	323;361;335;266	1	35	0	39.604	By MS/MS	By MS/MS	By MS/MS	By MS/MS	By MS/MS	By MS/MS
AT2G47580.1	AT2G47580.1	4	4	4	>AT2G47580.1 | Symbols: U1A | spliceosomal protein U1A | chr2:19517229-19518686 FORWARD LENGTH=250	1	4	4	4	3	2	4	4	4	4	4	4	3	2	4	4	4	4	4	4	3	2	4	4	4	4	4	4	15.6	15.6	15.6	28.074	250	250	1	29	0	26.112	By MS/MS	By MS/MS	By MS/MS	By MS/MS	By MS/MS	By MS/MS
AT3G62840.1;AT2G47640.4;AT2G47640.1;AT3G62840.2;AT2G47640.3;AT2G47640.2	AT3G62840.1;AT2G47640.4;AT2G47640.1;AT3G62840.2;AT2G47640.3;AT2G47640.2	3;3;3;2;2;2	3;3;3;2;2;2	3;3;3;2;2;2	>AT3G62840.1 | Symbols: | Small nuclear ribonucleoprotein family protein | chr3:23235727-23236615 REVERSE LENGTH=109;>AT2G47640.4 | Symbols: | Small nuclear ribonucleoprotein family protein | chr2:19537393-19538431 FORWARD LENGTH=109;>AT2G47640.1 | Symbo	6	3	3	3	2	1	3	2	3	3	3	3	2	1	3	2	3	3	3	3	2	1	3	2	3	3	3	3	28.4	28.4	28.4	12.635	109	109;109;109;108;108;108	1	25	0	18.167	By MS/MS	By matching	By MS/MS	By MS/MS	By MS/MS	By MS/MS
AT3G01500.1;AT3G01500.3;AT3G01500.2	AT3G01500.1;AT3G01500.3;AT3G01500.2	7;7;7	7;7;7	4;4;4	>AT3G01500.1 | Symbols: CA1, ATBCA1, SABP3, ATSABP3 | carbonic anhydrase 1 | chr3:194853-196716 REVERSE LENGTH=270;>AT3G01500.3 | Symbols: CA1 | carbonic anhydrase 1 | chr3:195173-197873 REVERSE LENGTH=336;>AT3G01500.2 | Symbols: CA1 | carbonic anhydrase 1	3	7	7	4	7	6	7	6	5	6	6	6	7	6	7	6	5	6	6	6	4	3	4	3	2	3	3	4	31.5	31.5	21.9	29.504	270	270;336;347	1	60	0	52.308	By MS/MS	By matching	By MS/MS	By MS/MS	By MS/MS	By MS/MS
AT3G01540.1;AT3G01540.4;AT3G01540.3;AT3G01540.2;AT5G14610.2;AT5G14610.1;AT3G06480.1	AT3G01540.1;AT3G01540.4;AT3G01540.3;AT3G01540.2	16;16;16;16;5;5;2	16;16;16;16;5;5;2	15;15;15;15;4;4;1	>AT3G01540.1 | Symbols: DRH1, ATDRH1 | DEAD box RNA helicase 1 | chr3:213077-216142 REVERSE LENGTH=618;>AT3G01540.4 | Symbols: DRH1, ATDRH1 | DEAD box RNA helicase 1 | chr3:213077-216142 REVERSE LENGTH=619;>AT3G01540.3 | Symbols: DRH1, ATDRH1 | DEAD box RN	7	16	16	15	15	10	14	11	11	12	12	13	15	10	14	11	11	12	12	13	14	9	13	10	10	11	11	12	31.7	31.7	29.9	67.64	618	618;619;619;619;645;712;1088	1	115	0	139.48	By MS/MS	By MS/MS	By MS/MS	By MS/MS	By MS/MS	By MS/MS
AT3G02080.1;AT5G15520.1	AT3G02080.1;AT5G15520.1	5;4	5;4	2;1	>AT3G02080.1 | Symbols: | Ribosomal protein S19e family protein | chr3:364138-365161 REVERSE LENGTH=143;>AT5G15520.1 | Symbols: | Ribosomal protein S19e family protein | chr5:5037242-5038136 REVERSE LENGTH=143	2	5	5	2	4	5	5	5	5	4	5	3	4	5	5	5	5	4	5	3	1	2	2	2	2	1	2	1	35	35	14	15.828	143	143;143	1	36	0	31.161	By MS/MS	By MS/MS	By MS/MS	By MS/MS	By MS/MS	By MS/MS
AT3G02110.1	AT3G02110.1	9	9	9	>AT3G02110.1 | Symbols: scpl25 | serine carboxypeptidase-like 25 | chr3:370902-373637 REVERSE LENGTH=473	1	9	9	9	9	8	9	9	7	9	8	8	9	8	9	9	7	9	8	8	9	8	9	9	7	9	8	8	22	22	22	53.4	473	473	1	71	0	97.187	By MS/MS	By MS/MS	By MS/MS	By MS/MS	By MS/MS	By MS/MS
AT3G02200.2;AT3G02200.1	AT3G02200.2;AT3G02200.1	4;3	4;3	4;3	>AT3G02200.2 | Symbols: | Proteasome component (PCI) domain protein | chr3:406692-408919 FORWARD LENGTH=417;>AT3G02200.1 | Symbols: | Proteasome component (PCI) domain protein | chr3:406692-408675 FORWARD LENGTH=364	2	4	4	4	3	3	4	3	2	2	3	4	3	3	4	3	2	2	3	4	3	3	4	3	2	2	3	4	11.8	11.8	11.8	46.784	417	417;364	1	24	0	23.083	By MS/MS	By matching	By matching	By MS/MS	By matching	By matching
AT3G02510.1;AT3G02510.2;AT5G16040.1	AT3G02510.1;AT3G02510.2;AT5G16040.1	4;3;3	4;3;3	4;3;3	>AT3G02510.1 | Symbols: | Regulator of chromosome condensation (RCC1) family protein | chr3:522086-524536 REVERSE LENGTH=393;>AT3G02510.2 | Symbols: | Regulator of chromosome condensation (RCC1) family protein | chr3:522524-524536 REVERSE LENGTH=310;>AT5	3	4	4	4	2	1	1	2	3	4	4	4	2	1	1	2	3	4	4	4	2	1	1	2	3	4	4	4	12.2	12.2	12.2	42.5	393	393;310;396	1	21	0	24.697	By matching	By matching	By matching	By matching	By MS/MS	By MS/MS
AT3G02710.1	AT3G02710.1	5	5	5	>AT3G02710.1 | Symbols: | ARM repeat superfamily protein | chr3:583184-585780 FORWARD LENGTH=529	1	5	5	5	4	2	3	4	3	1	2	2	4	2	3	4	3	1	2	2	4	2	3	4	3	1	2	2	11.9	11.9	11.9	60.145	529	529	1	21	0	31.618	By MS/MS	By matching	By MS/MS	By MS/MS	By MS/MS	By matching
AT3G02760.1	AT3G02760.1	3	3	3	>AT3G02760.1 | Symbols: | Class II aaRS and biotin synthetases superfamily protein | chr3:597588-600650 REVERSE LENGTH=883	1	3	3	3	1	3	3	3	2	2	1	2	1	3	3	3	2	2	1	2	1	3	3	3	2	2	1	2	4.4	4.4	4.4	97.536	883	883	1	17	0	19.932	By MS/MS	By matching	By MS/MS	By MS/MS	By MS/MS	By MS/MS
AT3G02830.1	AT3G02830.1	2	2	2	>AT3G02830.1 | Symbols: ZFN1 | zinc finger protein 1 | chr3:614075-615916 FORWARD LENGTH=397	1	2	2	2	0	0	0	0	2	2	2	2	0	0	0	0	2	2	2	2	0	0	0	0	2	2	2	2	5.3	5.3	5.3	44.181	397	397	1	8	0.001269	11.136	By matching	By matching	By matching	By matching	By matching	By matching
AT3G03630.1	AT3G03630.1	2	2	2	>AT3G03630.1 | Symbols: CS26 | cysteine synthase 26 | chr3:878388-880400 REVERSE LENGTH=404	1	2	2	2	2	1	2	1	1	2	1	2	2	1	2	1	1	2	1	2	2	1	2	1	1	2	1	2	5.4	5.4	5.4	43.16	404	404	1	12	0	11.554	By MS/MS	By matching	By matching	By matching	By MS/MS	By MS/MS
AT3G03960.1	AT3G03960.1	8	8	8	>AT3G03960.1 | Symbols: | TCP-1/cpn60 chaperonin family protein | chr3:1024432-1027604 FORWARD LENGTH=549	1	8	8	8	8	6	8	8	7	6	8	8	8	6	8	8	7	6	8	8	8	6	8	8	7	6	8	8	18	18	18	58.939	549	549	1	59	0	59.754	By MS/MS	By MS/MS	By MS/MS	By MS/MS	By MS/MS	By MS/MS
AT3G04260.1	AT3G04260.1	4	4	4	>AT3G04260.1 | Symbols: PTAC3 | plastid transcriptionally active 3 | chr3:1123231-1127515 REVERSE LENGTH=910	1	4	4	4	4	3	4	3	3	3	4	3	4	3	4	3	3	3	4	3	4	3	4	3	3	3	4	3	5.8	5.8	5.8	102.92	910	910	1	27	0	24.806	By MS/MS	By matching	By MS/MS	By matching	By MS/MS	By matching
AT3G04600.3;AT3G04600.2;AT3G04600.1	AT3G04600.3;AT3G04600.2;AT3G04600.1	5;5;5	5;5;5	5;5;5	>AT3G04600.3 | Symbols: | Nucleotidylyl transferase superfamily protein | chr3:1243152-1245958 FORWARD LENGTH=402;>AT3G04600.2 | Symbols: | Nucleotidylyl transferase superfamily protein | chr3:1243152-1245958 FORWARD LENGTH=402;>AT3G04600.1 | Symbols: |	3	5	5	5	4	4	5	5	3	5	5	4	4	4	5	5	3	5	5	4	4	4	5	5	3	5	5	4	15.2	15.2	15.2	45.754	402	402;402;402	1	36	0	34.16	By MS/MS	By MS/MS	By MS/MS	By MS/MS	By MS/MS	By MS/MS
AT3G04650.1	AT3G04650.1	2	2	2	>AT3G04650.1 | Symbols: | FAD/NAD(P)-binding oxidoreductase family protein | chr3:1262017-1264343 FORWARD LENGTH=486	1	2	2	2	2	1	2	2	2	2	2	2	2	1	2	2	2	2	2	2	2	1	2	2	2	2	2	2	6.2	6.2	6.2	52.362	486	486	1	15	0	20.332	By MS/MS	By matching	By MS/MS	By MS/MS	By MS/MS	By MS/MS
AT3G05060.1	AT3G05060.1	5	5	4	>AT3G05060.1 | Symbols: | NOP56-like pre RNA processing ribonucleoprotein | chr3:1413174-1415564 REVERSE LENGTH=533	1	5	5	4	5	3	4	5	4	5	5	5	5	3	4	5	4	5	5	5	4	3	3	4	3	4	4	4	12.4	12.4	9.9	59.002	533	533	1	49	0	41.463	By MS/MS	By MS/MS	By MS/MS	By MS/MS	By MS/MS	By MS/MS
AT3G05910.1;AT3G05910.2;AT5G26670.2;AT5G26670.1	AT3G05910.1;AT3G05910.2	3;2;1;1	3;2;1;1	3;2;1;1	>AT3G05910.1 | Symbols: | Pectinacetylesterase family protein | chr3:1764509-1767240 REVERSE LENGTH=415;>AT3G05910.2 | Symbols: | Pectinacetylesterase family protein | chr3:1764389-1767240 REVERSE LENGTH=311	4	3	3	3	2	2	3	2	1	2	2	1	2	2	3	2	1	2	2	1	2	2	3	2	1	2	2	1	8.7	8.7	8.7	46.326	415	415;311;298;416	1	15	0	18.569	By MS/MS	By matching	By MS/MS	By MS/MS	By MS/MS	By MS/MS
AT3G06650.1	AT3G06650.1	9	9	2	>AT3G06650.1 | Symbols: ACLB-1 | ATP-citrate lyase B-1 | chr3:2079247-2082633 REVERSE LENGTH=608	1	9	9	2	5	5	7	6	5	5	5	8	5	5	7	6	5	5	5	8	1	0	1	1	0	0	0	2	18.8	18.8	4.4	65.813	608	608	1	46	0	86.438	By MS/MS	By MS/MS	By MS/MS	By MS/MS	By MS/MS	By MS/MS
AT3G06860.1	AT3G06860.1	12	12	12	>AT3G06860.1 | Symbols: MFP2, ATMFP2 | multifunctional protein 2 | chr3:2161926-2166009 FORWARD LENGTH=725	1	12	12	12	8	2	12	10	3	4	4	9	8	2	12	10	3	4	4	9	8	2	12	10	3	4	4	9	19.4	19.4	19.4	78.839	725	725	1	56	0	113.93	By MS/MS	By matching	By MS/MS	By MS/MS	By matching	By matching
AT3G06980.1	AT3G06980.1	3	3	3	>AT3G06980.1 | Symbols: | DEA(D/H)-box RNA helicase family protein | chr3:2201531-2204662 FORWARD LENGTH=781	1	3	3	3	3	3	3	3	3	3	3	3	3	3	3	3	3	3	3	3	3	3	3	3	3	3	3	3	4	4	4	87.428	781	781	1	24	0	18.065	By MS/MS	By matching	By matching	By MS/MS	By MS/MS	By MS/MS
AT3G07810.1;AT3G07810.2	AT3G07810.1;AT3G07810.2	3;3	3;3	3;3	>AT3G07810.1 | Symbols: | RNA-binding (RRM/RBD/RNP motifs) family protein | chr3:2492875-2495052 FORWARD LENGTH=494;>AT3G07810.2 | Symbols: | RNA-binding (RRM/RBD/RNP motifs) family protein | chr3:2492875-2495102 FORWARD LENGTH=495	2	3	3	3	0	0	1	0	2	3	3	2	0	0	1	0	2	3	3	2	0	0	1	0	2	3	3	2	8.9	8.9	8.9	51.871	494	494;495	1	11	0	22.526	By matching	By matching	By matching	By matching	By MS/MS	By MS/MS
AT3G08030.2;AT3G08030.1	AT3G08030.2;AT3G08030.1	9;9	9;9	9;9	>AT3G08030.2 | Symbols: | Protein of unknown function, DUF642 | chr3:2564517-2565819 FORWARD LENGTH=323;>AT3G08030.1 | Symbols: | Protein of unknown function, DUF642 | chr3:2564191-2565819 FORWARD LENGTH=365	2	9	9	9	9	7	9	7	6	6	5	7	9	7	9	7	6	6	5	7	9	7	9	7	6	6	5	7	37.2	37.2	37.2	34.7	323	323;365	1	70	0	84.546	By MS/MS	By MS/MS	By MS/MS	By MS/MS	By MS/MS	By MS/MS
AT3G08580.2;AT3G08580.1;AT4G28390.1	AT3G08580.2;AT3G08580.1	5;5;2	5;5;2	3;3;0	>AT3G08580.2 | Symbols: AAC1 | ADP/ATP carrier 1 | chr3:2605706-2607030 REVERSE LENGTH=381;>AT3G08580.1 | Symbols: AAC1 | ADP/ATP carrier 1 | chr3:2605706-2607030 REVERSE LENGTH=381	3	5	5	3	5	4	4	4	4	1	2	4	5	4	4	4	4	1	2	4	3	3	3	3	3	0	1	3	14.2	14.2	8.9	41.475	381	381;381;379	1	28	0	30.147	By MS/MS	By MS/MS	By MS/MS	By MS/MS	By MS/MS	By MS/MS
AT3G08940.2;AT3G08940.1	AT3G08940.2;AT3G08940.1	5;3	5;3	5;3	>AT3G08940.2 | Symbols: LHCB4.2 | light harvesting complex photosystem II | chr3:2717717-2718665 FORWARD LENGTH=287;>AT3G08940.1 | Symbols: LHCB4.2 | light harvesting complex photosystem II | chr3:2717717-2718400 FORWARD LENGTH=227	2	5	5	5	5	3	4	4	3	2	5	4	5	3	4	4	3	2	5	4	5	3	4	4	3	2	5	4	19.9	19.9	19.9	31.193	287	287;227	1	44	0	56.2	By MS/MS	By MS/MS	By MS/MS	By MS/MS	By MS/MS	By MS/MS
AT3G09200.2;AT3G09200.1;AT2G40010.1;AT3G11250.1	AT3G09200.2;AT3G09200.1;AT2G40010.1;AT3G11250.1	3;3;2;2	3;3;2;2	3;3;2;2	>AT3G09200.2 | Symbols: | Ribosomal protein L10 family protein | chr3:2823364-2825020 REVERSE LENGTH=287;>AT3G09200.1 | Symbols: | Ribosomal protein L10 family protein | chr3:2823364-2825020 REVERSE LENGTH=320;>AT2G40010.1 | Symbols: | Ribosomal protein	4	3	3	3	3	2	2	3	3	3	3	3	3	2	2	3	3	3	3	3	3	2	2	3	3	3	3	3	16	16	16	30.618	287	287;320;317;323	1	22	0	27.489	By MS/MS	By MS/MS	By matching	By MS/MS	By MS/MS	By MS/MS
AT3G09350.3;AT3G09350.2;AT3G09350.1	AT3G09350.3;AT3G09350.2;AT3G09350.1	2;2;2	2;2;2	2;2;2	>AT3G09350.3 | Symbols: Fes1A | Fes1A | chr3:2871710-2873109 FORWARD LENGTH=327;>AT3G09350.2 | Symbols: Fes1A | Fes1A | chr3:2871710-2873109 FORWARD LENGTH=327;>AT3G09350.1 | Symbols: Fes1A | Fes1A | chr3:2871216-2873109 FORWARD LENGTH=363	3	2	2	2	2	2	2	2	2	1	2	2	2	2	2	2	2	1	2	2	2	2	2	2	2	1	2	2	12.5	12.5	12.5	36.184	327	327;327;363	1	21	0	12.742	By matching	By matching	By MS/MS	By matching	By matching	By matching
AT3G09440.2;AT3G09440.1	AT3G09440.2;AT3G09440.1	13;13	3;3	3;3	>AT3G09440.2 | Symbols: | Heat shock protein 70 (Hsp 70) family protein | chr3:2903434-2905632 REVERSE LENGTH=649;>AT3G09440.1 | Symbols: | Heat shock protein 70 (Hsp 70) family protein | chr3:2903434-2905632 REVERSE LENGTH=649	2	13	3	3	13	10	12	12	8	7	10	9	3	0	3	2	1	0	0	0	3	0	3	2	1	0	0	0	22.5	5.1	5.1	71.147	649	649;649	1	9	0	17.264	By MS/MS	By matching	By MS/MS	By MS/MS	By matching	By matching
AT3G09840.1;AT5G03340.1;AT3G53230.1	AT3G09840.1;AT5G03340.1;AT3G53230.1	2;2;2	2;2;2	2;2;2	>AT3G09840.1 | Symbols: CDC48, ATCDC48, CDC48A | cell division cycle 48 | chr3:3019494-3022832 FORWARD LENGTH=809;>AT5G03340.1 | Symbols: | ATPase, AAA-type, CDC48 protein | chr5:810091-813133 REVERSE LENGTH=810;>AT3G53230.1 | Symbols: | ATPase, AAA-type	3	2	2	2	1	1	2	2	1	2	2	2	1	1	2	2	1	2	2	2	1	1	2	2	1	2	2	2	2.7	2.7	2.7	89.392	809	809;810;815	1	13	0	12.02	By matching	By MS/MS	By matching	By MS/MS	By matching	By matching
AT5G04130.1;AT3G10270.1;AT5G04130.2	AT5G04130.1;AT3G10270.1	3;3;1	3;3;1	3;3;1	>AT5G04130.1 | Symbols: GYRB2 | DNA GYRASE B2 | chr5:1122084-1128031 REVERSE LENGTH=732;>AT3G10270.1 | Symbols: GYRB1 | DNA GYRASE B1 | chr3:3173805-3179756 REVERSE LENGTH=772	3	3	3	3	3	2	3	3	1	1	1	1	3	2	3	3	1	1	1	1	3	2	3	3	1	1	1	1	4.8	4.8	4.8	81.052	732	732;772;519	1	15	0	17.352	By MS/MS	By matching	By MS/MS	By MS/MS	By matching	By matching
AT3G10690.1	AT3G10690.1	8	8	8	>AT3G10690.1 | Symbols: GYRA | DNA GYRASE A | chr3:3339612-3346243 REVERSE LENGTH=950	1	8	8	8	5	4	5	6	5	4	7	8	5	4	5	6	5	4	7	8	5	4	5	6	5	4	7	8	10	10	10	104.54	950	950	1	44	0	49.729	By MS/MS	By MS/MS	By MS/MS	By MS/MS	By MS/MS	By MS/MS
AT3G11450.1	AT3G11450.1	3	3	3	>AT3G11450.1 | Symbols: | DnaJ domain ;Myb-like DNA-binding domain | chr3:3605459-3607402 REVERSE LENGTH=647	1	3	3	3	3	2	3	3	2	2	2	2	3	2	3	3	2	2	2	2	3	2	3	3	2	2	2	2	5.1	5.1	5.1	73.989	647	647	1	19	0	18.405	By MS/MS	By matching	By MS/MS	By MS/MS	By MS/MS	By MS/MS
AT3G11510.1	AT3G11510.1	4	4	1	>AT3G11510.1 | Symbols: | Ribosomal protein S11 family protein | chr3:3623757-3624866 REVERSE LENGTH=150	1	4	4	1	4	1	2	3	2	2	1	2	4	1	2	3	2	2	1	2	1	0	1	1	1	1	0	1	37.3	37.3	7.3	16.273	150	150	1	18	0	29.009	By MS/MS	By MS/MS	By MS/MS	By MS/MS	By MS/MS	By MS/MS
AT3G11630.1	AT3G11630.1	3	3	1	>AT3G11630.1 | Symbols: | Thioredoxin superfamily protein | chr3:3672189-3673937 FORWARD LENGTH=266	1	3	3	1	3	1	2	2	2	2	2	2	3	1	2	2	2	2	2	2	1	1	1	1	1	1	1	1	17.3	17.3	5.3	29.092	266	266	1	18	0	39.639	By MS/MS	By MS/MS	By MS/MS	By MS/MS	By MS/MS	By MS/MS
AT3G11710.1	AT3G11710.1	8	8	8	>AT3G11710.1 | Symbols: ATKRS-1 | lysyl-tRNA synthetase 1 | chr3:3702359-3705613 REVERSE LENGTH=626	1	8	8	8	7	5	8	7	2	3	4	4	7	5	8	7	2	3	4	4	7	5	8	7	2	3	4	4	16	16	16	70.887	626	626	1	42	0	56.462	By MS/MS	By MS/MS	By MS/MS	By MS/MS	By matching	By matching
AT3G11830.1;AT3G11830.2	AT3G11830.1;AT3G11830.2	9;8	9;8	9;8	>AT3G11830.1 | Symbols: | TCP-1/cpn60 chaperonin family protein | chr3:3732734-3736156 FORWARD LENGTH=557;>AT3G11830.2 | Symbols: | TCP-1/cpn60 chaperonin family protein | chr3:3732734-3736156 FORWARD LENGTH=555	2	9	9	9	8	7	9	9	4	5	5	6	8	7	9	9	4	5	5	6	8	7	9	9	4	5	5	6	20.3	20.3	20.3	59.776	557	557;555	1	58	0	61.741	By MS/MS	By matching	By MS/MS	By MS/MS	By matching	By matching
AT3G12145.1	AT3G12145.1	3	3	3	>AT3G12145.1 | Symbols: FLR1, FLOR1 | Leucine-rich repeat (LRR) family protein | chr3:3874764-3876075 REVERSE LENGTH=325	1	3	3	3	3	2	3	2	1	0	0	1	3	2	3	2	1	0	0	1	3	2	3	2	1	0	0	1	13.8	13.8	13.8	35.808	325	325	1	12	0	20.265	By MS/MS	By MS/MS	By MS/MS	By matching	By matching	By matching
AT3G12290.1	AT3G12290.1	6	6	6	>AT3G12290.1 | Symbols: | Amino acid dehydrogenase family protein | chr3:3919591-3921326 FORWARD LENGTH=299	1	6	6	6	2	3	5	4	3	3	4	5	2	3	5	4	3	3	4	5	2	3	5	4	3	3	4	5	23.7	23.7	23.7	31.589	299	299	1	29	0	39.653	By MS/MS	By MS/MS	By MS/MS	By MS/MS	By MS/MS	By MS/MS
AT3G12700.1;AT3G12700.2	AT3G12700.1	6;2	6;2	6;2	>AT3G12700.1 | Symbols: | Eukaryotic aspartyl protease family protein | chr3:4037136-4039043 FORWARD LENGTH=461	2	6	6	6	6	6	5	6	6	6	6	6	6	6	5	6	6	6	6	6	6	6	5	6	6	6	6	6	15.2	15.2	15.2	50.567	461	461;263	1	62	0	188.16	By MS/MS	By MS/MS	By MS/MS	By MS/MS	By MS/MS	By MS/MS
AT3G12780.1;AT1G56190.2;AT1G56190.1;AT1G79550.2;AT1G79550.1	AT3G12780.1;AT1G56190.2;AT1G56190.1	13;8;8;1;1	13;8;8;1;1	13;8;8;1;1	>AT3G12780.1 | Symbols: PGK1 | phosphoglycerate kinase 1 | chr3:4061127-4063140 REVERSE LENGTH=481;>AT1G56190.2 | Symbols: | Phosphoglycerate kinase family protein | chr1:21028622-21030454 FORWARD LENGTH=405;>AT1G56190.1 | Symbols: | Phosphoglycerate kin	5	13	13	13	12	6	11	9	6	7	8	7	12	6	11	9	6	7	8	7	12	6	11	9	6	7	8	7	33.5	33.5	33.5	50.111	481	481;405;478;401;401	1	67	0	95.88	By MS/MS	By MS/MS	By MS/MS	By MS/MS	By MS/MS	By MS/MS
AT3G12800.1;AT2G07640.1	AT3G12800.1	11;2	11;2	11;2	>AT3G12800.1 | Symbols: SDRB, DECR | short-chain dehydrogenase-reductase B | chr3:4063463-4064757 REVERSE LENGTH=298	2	11	11	11	9	7	6	8	8	10	9	10	9	7	6	8	8	10	9	10	9	7	6	8	8	10	9	10	41.3	41.3	41.3	31.796	298	298;156	1	126	0	151.65	By MS/MS	By MS/MS	By MS/MS	By MS/MS	By MS/MS	By MS/MS
AT3G13224.1;AT3G13224.2	AT3G13224.1;AT3G13224.2	2;2	2;2	2;2	>AT3G13224.1 | Symbols: | RNA-binding (RRM/RBD/RNP motifs) family protein | chr3:4254848-4256014 FORWARD LENGTH=231;>AT3G13224.2 | Symbols: | RNA-binding (RRM/RBD/RNP motifs) family protein | chr3:4254848-4256621 FORWARD LENGTH=358	2	2	2	2	0	0	0	0	2	2	2	2	0	0	0	0	2	2	2	2	0	0	0	0	2	2	2	2	11.3	11.3	11.3	26.139	231	231;358	1	8	0	12.033	By matching	By matching	By matching	By matching	By MS/MS	By MS/MS
AT3G13460.2;AT3G13460.4;AT3G13460.1;AT3G13460.3	AT3G13460.2;AT3G13460.4;AT3G13460.1;AT3G13460.3	3;3;3;2	3;3;3;2	3;3;3;2	>AT3G13460.2 | Symbols: ECT2 | evolutionarily conserved C-terminal region 2 | chr3:4385274-4388220 REVERSE LENGTH=664;>AT3G13460.4 | Symbols: ECT2 | evolutionarily conserved C-terminal region 2 | chr3:4385274-4388220 REVERSE LENGTH=666;>AT3G13460.1 | Symbo	4	3	3	3	3	1	3	2	3	3	2	2	3	1	3	2	3	3	2	2	3	1	3	2	3	3	2	2	5.6	5.6	5.6	72.196	664	664;666;667;508	1	19	0	17.931	By matching	By matching	By matching	By matching	By MS/MS	By MS/MS
AT3G13750.1	AT3G13750.1	11	11	11	>AT3G13750.1 | Symbols: BGAL1 | beta galactosidase 1 | chr3:4511192-4515756 FORWARD LENGTH=847	1	11	11	11	9	6	11	8	5	6	6	7	9	6	11	8	5	6	6	7	9	6	11	8	5	6	6	7	19.8	19.8	19.8	93.658	847	847	1	62	0	72.571	By MS/MS	By MS/MS	By MS/MS	By MS/MS	By MS/MS	By MS/MS
AT3G13790.1;AT3G13790.2;AT1G55120.1;AT1G55120.2;AT1G55120.3	AT3G13790.1;AT3G13790.2	24;23;2;1;1	24;23;2;1;1	24;23;2;1;1	>AT3G13790.1 | Symbols: ATCWINV1, ATBFRUCT1 | Glycosyl hydrolases family 32 protein | chr3:4533084-4535831 REVERSE LENGTH=584;>AT3G13790.2 | Symbols: ATBFRUCT1 | Glycosyl hydrolases family 32 protein | chr3:4533084-4535831 REVERSE LENGTH=581	5	24	24	24	22	21	16	19	21	21	23	23	22	21	16	19	21	21	23	23	22	21	16	19	21	21	23	23	41.6	41.6	41.6	66.28	584	584;581;594;555;579	1	229	0	323.31	By MS/MS	By MS/MS	By MS/MS	By MS/MS	By MS/MS	By MS/MS
AT3G13920.3;AT3G13920.1;AT3G13920.2;AT3G13920.4;AT1G54270.1;AT1G72730.1;AT1G54270.2	AT3G13920.3;AT3G13920.1;AT3G13920.2;AT3G13920.4;AT1G54270.1;AT1G72730.1;AT1G54270.2	9;9;9;8;7;7;6	9;9;9;8;7;7;6	8;8;8;7;6;6;5	>AT3G13920.3 | Symbols: EIF4A1, RH4, TIF4A1 | eukaryotic translation initiation factor 4A1 | chr3:4592635-4594094 REVERSE LENGTH=402;>AT3G13920.1 | Symbols: EIF4A1, RH4, TIF4A1 | eukaryotic translation initiation factor 4A1 | chr3:4592635-4594128 REVERSE L	7	9	9	8	9	6	8	7	7	5	5	7	9	6	8	7	7	5	5	7	8	5	7	6	6	4	4	6	27.9	27.9	25.4	45.7	402	402;412;415;407;412;414;407	1	57	0	67.445	By MS/MS	By MS/MS	By MS/MS	By MS/MS	By MS/MS	By MS/MS
AT3G14110.2;AT3G14110.1;AT3G14110.3	AT3G14110.2;AT3G14110.1;AT3G14110.3	5;5;5	5;5;5	5;5;5	>AT3G14110.2 | Symbols: FLU | Tetratricopeptide repeat (TPR)-like superfamily protein | chr3:4676222-4677010 REVERSE LENGTH=232;>AT3G14110.1 | Symbols: FLU | Tetratricopeptide repeat (TPR)-like superfamily protein | chr3:4676222-4677602 REVERSE LENGTH=316;	3	5	5	5	4	4	4	4	2	3	5	4	4	4	4	4	2	3	5	4	4	4	4	4	2	3	5	4	22.4	22.4	22.4	25.718	232	232;316;317	1	30	0	41.789	By MS/MS	By MS/MS	By MS/MS	By MS/MS	By matching	By matching
AT3G14310.1;AT1G53830.1	AT3G14310.1	17;4	17;4	17;4	>AT3G14310.1 | Symbols: ATPME3, PME3 | pectin methylesterase 3 | chr3:4772214-4775095 REVERSE LENGTH=592	2	17	17	17	13	14	17	15	14	15	15	15	13	14	17	15	14	15	15	15	13	14	17	15	14	15	15	15	28.9	28.9	28.9	64.255	592	592;587	1	201	0	323.31	By MS/MS	By MS/MS	By MS/MS	By MS/MS	By MS/MS	By MS/MS
AT3G14420.2;AT3G14420.1;AT3G14420.4;AT3G14420.5;AT3G14420.6;AT3G14415.3;AT3G14415.1;AT3G14415.2;AT3G14420.3	AT3G14420.2;AT3G14420.1;AT3G14420.4;AT3G14420.5;AT3G14420.6;AT3G14415.3;AT3G14415.1;AT3G14415.2;AT3G14420.3	6;6;5;5;5;5;5;5;4	6;6;5;5;5;5;5;5;4	6;6;5;5;5;5;5;5;4	>AT3G14420.2 | Symbols: | Aldolase-type TIM barrel family protein | chr3:4821804-4823899 FORWARD LENGTH=367;>AT3G14420.1 | Symbols: | Aldolase-type TIM barrel family protein | chr3:4821804-4823899 FORWARD LENGTH=367;>AT3G14420.4 | Symbols: | Aldolase-ty	9	6	6	6	6	0	4	4	1	1	0	4	6	0	4	4	1	1	0	4	6	0	4	4	1	1	0	4	20.7	20.7	20.7	40.341	367	367;367;348;360;366;367;367;373;367	1	20	0	44.725	By MS/MS	By matching	By MS/MS	By MS/MS	By matching	By matching
AT3G15190.1	AT3G15190.1	3	3	3	>AT3G15190.1 | Symbols: | chloroplast 30S ribosomal protein S20, putative | chr3:5116216-5117412 FORWARD LENGTH=202	1	3	3	3	2	1	1	2	2	2	3	2	2	1	1	2	2	2	3	2	2	1	1	2	2	2	3	2	16.3	16.3	16.3	21.826	202	202	1	16	0	19.952	By MS/MS	By matching	By matching	By MS/MS	By MS/MS	By MS/MS
AT3G15356.1	AT3G15356.1	8	6	5	>AT3G15356.1 | Symbols: | Legume lectin family protein | chr3:5174603-5175418 REVERSE LENGTH=271	1	8	6	5	8	8	8	6	8	8	7	8	6	6	6	5	6	6	6	6	5	5	5	4	5	5	5	5	36.2	29.9	26.2	29.749	271	271	1	63	0	129.86	By MS/MS	By MS/MS	By MS/MS	By MS/MS	By MS/MS	By MS/MS
AT3G15980.1;AT3G15980.4;AT3G15980.3;AT3G15980.2;AT3G15980.5	AT3G15980.1;AT3G15980.4;AT3G15980.3;AT3G15980.2;AT3G15980.5	8;8;8;8;7	8;8;8;8;7	2;2;2;2;1	>AT3G15980.1 | Symbols: | Coatomer, beta subunit | chr3:5411699-5418313 REVERSE LENGTH=909;>AT3G15980.4 | Symbols: | Coatomer, beta subunit | chr3:5411699-5418313 REVERSE LENGTH=914;>AT3G15980.3 | Symbols: | Coatomer, beta subunit | chr3:5412015-5418	5	8	8	2	4	4	4	7	6	8	8	8	4	4	4	7	6	8	8	8	0	0	0	1	1	2	2	2	9.4	9.4	2.6	102.48	909	909;914;918;918;930	1	49	0	159	By MS/MS	By matching	By matching	By MS/MS	By MS/MS	By MS/MS
AT3G16000.1	AT3G16000.1	6	6	6	>AT3G16000.1 | Symbols: MFP1 | MAR binding filament-like protein 1 | chr3:5431041-5433613 REVERSE LENGTH=726	1	6	6	6	5	3	6	5	3	3	3	2	5	3	6	5	3	3	3	2	5	3	6	5	3	3	3	2	10.6	10.6	10.6	81.972	726	726	1	32	0	46.565	By MS/MS	By matching	By MS/MS	By MS/MS	By matching	By matching
AT3G16220.1	AT3G16220.1	5	5	5	>AT3G16220.1 | Symbols: | Predicted eukaryotic LigT | chr3:5497713-5499068 FORWARD LENGTH=257	1	5	5	5	3	2	4	4	4	3	3	5	3	2	4	4	4	3	3	5	3	2	4	4	4	3	3	5	19.5	19.5	19.5	29.477	257	257	1	28	0	46.204	By MS/MS	By matching	By MS/MS	By MS/MS	By MS/MS	By MS/MS
AT3G16230.3;AT3G16230.1;AT3G16230.2	AT3G16230.3;AT3G16230.1;AT3G16230.2	3;3;3	3;3;3	3;3;3	>AT3G16230.3 | Symbols: | Predicted eukaryotic LigT | chr3:5500991-5503303 FORWARD LENGTH=409;>AT3G16230.1 | Symbols: | Predicted eukaryotic LigT | chr3:5500991-5503303 FORWARD LENGTH=409;>AT3G16230.2 | Symbols: | Predicted eukaryotic LigT | chr3:550056	3	3	3	3	1	0	1	1	3	3	2	2	1	0	1	1	3	3	2	2	1	0	1	1	3	3	2	2	9.5	9.5	9.5	45.395	409	409;409;449	1	13	0	19.599	By matching	By matching	By matching	By matching	By MS/MS	By MS/MS
AT3G16430.2;AT3G16430.1;AT3G16420.3;AT3G16420.2;AT3G16420.1	AT3G16430.2;AT3G16430.1;AT3G16420.3;AT3G16420.2;AT3G16420.1	3;3;3;3;3	3;3;3;3;3	3;3;3;3;3	>AT3G16430.2 | Symbols: JAL31 | jacalin-related lectin 31 | chr3:5581830-5582959 FORWARD LENGTH=296;>AT3G16430.1 | Symbols: JAL31 | jacalin-related lectin 31 | chr3:5581830-5582959 FORWARD LENGTH=296;>AT3G16420.3 | Symbols: PBP1 | PYK10-binding protein 1 |	5	3	3	3	2	0	3	2	1	2	2	1	2	0	3	2	1	2	2	1	2	0	3	2	1	2	2	1	13.2	13.2	13.2	32.233	296	296;296;298;298;298	1	13	0	17.417	By MS/MS	By matching	By MS/MS	By matching	By matching	By matching
AT3G16530.1	AT3G16530.1	9	8	7	>AT3G16530.1 | Symbols: | Legume lectin family protein | chr3:5624586-5625416 REVERSE LENGTH=276	1	9	8	7	8	8	9	7	9	7	7	8	7	7	8	7	8	6	7	7	6	6	7	6	7	5	6	6	37	34.1	30.8	30.509	276	276	1	75	0	96.454	By MS/MS	By MS/MS	By MS/MS	By MS/MS	By MS/MS	By MS/MS
AT3G17970.1	AT3G17970.1	5	5	5	>AT3G17970.1 | Symbols: atToc64-III, TOC64-III | translocon at the outer membrane of chloroplasts 64-III | chr3:6148030-6151794 FORWARD LENGTH=589	1	5	5	5	3	2	3	5	2	1	1	3	3	2	3	5	2	1	1	3	3	2	3	5	2	1	1	3	10.2	10.2	10.2	64.025	589	589	1	23	0	35.921	By MS/MS	By matching	By MS/MS	By MS/MS	By matching	By matching
AT3G18035.1	AT3G18035.1	3	3	3	>AT3G18035.1 | Symbols: HON4 | winged-helix DNA-binding transcription factor family protein | chr3:6169384-6171558 REVERSE LENGTH=480	1	3	3	3	3	1	3	3	3	3	3	3	3	1	3	3	3	3	3	3	3	1	3	3	3	3	3	3	10.4	10.4	10.4	51.524	480	480	1	22	0	54.449	By MS/MS	By matching	By MS/MS	By MS/MS	By MS/MS	By MS/MS
AT3G18080.1;AT3G18070.2;AT3G18070.1	AT3G18080.1	10;2;2	10;2;2	10;2;2	>AT3G18080.1 | Symbols: BGLU44 | B-S glucosidase 44 | chr3:6191586-6194124 FORWARD LENGTH=512	3	10	10	10	8	9	8	9	10	9	10	8	8	9	8	9	10	9	10	8	8	9	8	9	10	9	10	8	25	25	25	58.983	512	512;424;501	1	103	0	147.77	By MS/MS	By MS/MS	By MS/MS	By MS/MS	By MS/MS	By MS/MS
AT3G18190.1	AT3G18190.1	7	7	7	>AT3G18190.1 | Symbols: | TCP-1/cpn60 chaperonin family protein | chr3:6232226-6233836 FORWARD LENGTH=536	1	7	7	7	7	5	5	5	5	4	3	3	7	5	5	5	5	4	3	3	7	5	5	5	5	4	3	3	17.5	17.5	17.5	57.775	536	536	1	39	0	44.098	By MS/MS	By MS/MS	By MS/MS	By MS/MS	By matching	By matching
AT3G18790.1	AT3G18790.1	5	5	5	>AT3G18790.1 | Symbols: | FUNCTIONS IN: molecular_function unknown; INVOLVED IN: biological_process unknown; LOCATED IN: chloroplast; EXPRESSED IN: 22 plant structures; EXPRESSED DURING: 13 growth stages; CONTAINS InterPro DOMAIN/s: Isy1-like splicing (In	1	5	5	5	3	1	3	3	5	5	5	4	3	1	3	3	5	5	5	4	3	1	3	3	5	5	5	4	23	23	23	35.377	300	300	1	29	0	29.503	By matching	By MS/MS	By MS/MS	By MS/MS	By MS/MS	By MS/MS
AT3G18890.1	AT3G18890.1	14	14	14	>AT3G18890.1 | Symbols: | NAD(P)-binding Rossmann-fold superfamily protein | chr3:6511169-6514729 FORWARD LENGTH=641	1	14	14	14	12	10	13	12	10	9	9	12	12	10	13	12	10	9	9	12	12	10	13	12	10	9	9	12	30.3	30.3	30.3	68.341	641	641	1	94	0	123.19	By MS/MS	By MS/MS	By MS/MS	By MS/MS	By MS/MS	By MS/MS
AT3G18990.1	AT3G18990.1	6	6	5	>AT3G18990.1 | Symbols: VRN1, REM39 | AP2/B3-like transcriptional factor family protein | chr3:6549077-6551568 REVERSE LENGTH=341	1	6	6	5	6	5	6	4	5	5	4	5	6	5	6	4	5	5	4	5	5	4	5	4	4	4	3	4	17.6	17.6	14.7	39.274	341	341	1	40	0	36.451	By MS/MS	By matching	By MS/MS	By MS/MS	By MS/MS	By MS/MS
AT3G19760.1;AT1G51380.1	AT3G19760.1	7;1	6;1	6;1	>AT3G19760.1 | Symbols: EIF4A-III | eukaryotic initiation factor 4A-III | chr3:6863790-6866242 FORWARD LENGTH=408	2	7	6	6	5	5	7	6	6	6	6	6	4	4	6	5	5	5	5	5	4	4	6	5	5	5	5	5	18.9	16.4	16.4	45.844	408	408;392	1	39	0	39.187	By MS/MS	By MS/MS	By MS/MS	By MS/MS	By MS/MS	By MS/MS
AT3G19820.3;AT3G19820.2;AT3G19820.1	AT3G19820.3;AT3G19820.2;AT3G19820.1	9;9;9	9;9;9	9;9;9	>AT3G19820.3 | Symbols: DWF1 | cell elongation protein / DWARF1 / DIMINUTO (DIM) | chr3:6879835-6881616 REVERSE LENGTH=561;>AT3G19820.2 | Symbols: DWF1, DIM, EVE1, DIM1, CBB1 | cell elongation protein / DWARF1 / DIMINUTO (DIM) | chr3:6879835-6881616 REVERS	3	9	9	9	9	8	9	9	7	5	7	9	9	8	9	9	7	5	7	9	9	8	9	9	7	5	7	9	20.1	20.1	20.1	65.393	561	561;561;561	1	71	0	70.754	By MS/MS	By MS/MS	By MS/MS	By MS/MS	By MS/MS	By MS/MS
AT3G20050.1	AT3G20050.1	4	4	4	>AT3G20050.1 | Symbols: ATTCP-1, TCP-1 | T-complex protein 1 alpha subunit | chr3:6998544-7002266 REVERSE LENGTH=545	1	4	4	4	4	4	4	4	2	2	3	2	4	4	4	4	2	2	3	2	4	4	4	4	2	2	3	2	7.7	7.7	7.7	59.229	545	545	1	25	0	24.97	By MS/MS	By MS/MS	By MS/MS	By MS/MS	By matching	By matching
AT3G20820.1	AT3G20820.1	11	11	11	>AT3G20820.1 | Symbols: | Leucine-rich repeat (LRR) family protein | chr3:7280930-7282027 FORWARD LENGTH=365	1	11	11	11	10	9	9	9	11	11	10	11	10	9	9	9	11	11	10	11	10	9	9	9	11	11	10	11	41.1	41.1	41.1	39.862	365	365	1	99	0	323.31	By MS/MS	By MS/MS	By MS/MS	By MS/MS	By MS/MS	By MS/MS
AT3G22060.1	AT3G22060.1	6	6	6	>AT3G22060.1 | Symbols: | Receptor-like protein kinase-related family protein | chr3:7771065-7772137 FORWARD LENGTH=252	1	6	6	6	4	1	6	2	3	5	5	4	4	1	6	2	3	5	5	4	4	1	6	2	3	5	5	4	26.2	26.2	26.2	27.863	252	252	1	30	0	41.435	By MS/MS	By MS/MS	By MS/MS	By MS/MS	By MS/MS	By MS/MS
AT3G22220.2;AT3G22220.1	AT3G22220.2;AT3G22220.1	3;3	3;3	3;3	>AT3G22220.2 | Symbols: | hAT transposon superfamily | chr3:7839808-7842358 REVERSE LENGTH=761;>AT3G22220.1 | Symbols: | hAT transposon superfamily | chr3:7839808-7842358 REVERSE LENGTH=761	2	3	3	3	3	0	2	3	1	2	2	2	3	0	2	3	1	2	2	2	3	0	2	3	1	2	2	2	5.3	5.3	5.3	86.389	761	761;761	1	15	0	19.67	By MS/MS	By matching	By matching	By MS/MS	By matching	By MS/MS
AT3G22320.1	AT3G22320.1	4	4	4	>AT3G22320.1 | Symbols: ATRPABC24.3, RPB5A, NRPB5, NRPD5 | Eukaryotic rpb5 RNA polymerase subunit family protein | chr3:7891045-7892094 REVERSE LENGTH=205	1	4	4	4	3	2	4	3	1	2	2	2	3	2	4	3	1	2	2	2	3	2	4	3	1	2	2	2	23.9	23.9	23.9	24.301	205	205	1	19	0	27.162	By MS/MS	By matching	By MS/MS	By MS/MS	By MS/MS	By MS/MS
AT3G22520.1	AT3G22520.1	4	4	4	>AT3G22520.1 | Symbols: | unknown protein; INVOLVED IN: biological_process unknown; LOCATED IN: chloroplast stroma, chloroplast, chloroplast envelope; EXPRESSED IN: 24 plant structures; EXPRESSED DURING: 13 growth stages; BEST Arabidopsis thaliana protein	1	4	4	4	4	1	3	4	4	3	3	3	4	1	3	4	4	3	3	3	4	1	3	4	4	3	3	3	8	8	8	67.57	600	600	1	26	0	26.047	By MS/MS	By MS/MS	By MS/MS	By MS/MS	By MS/MS	By MS/MS
AT3G23700.1	AT3G23700.1	4	4	4	>AT3G23700.1 | Symbols: | Nucleic acid-binding proteins superfamily | chr3:8531689-8533742 REVERSE LENGTH=392	1	4	4	4	1	2	1	0	2	4	3	2	1	2	1	0	2	4	3	2	1	2	1	0	2	4	3	2	15.6	15.6	15.6	42.75	392	392	1	15	0	26.285	By matching	By matching	By matching	By matching	By MS/MS	By MS/MS
AT4G13940.4;AT4G13940.1;AT3G23810.1;AT4G13940.2;AT4G13940.3	AT4G13940.4;AT4G13940.1;AT3G23810.1;AT4G13940.2;AT4G13940.3	3;3;3;2;2	3;3;3;2;2	3;3;3;2;2	>AT4G13940.4 | Symbols: HOG1, SAHH1 | S-adenosyl-L-homocysteine hydrolase | chr4:8054931-8056763 FORWARD LENGTH=325;>AT4G13940.1 | Symbols: HOG1, EMB1395, SAHH1, MEE58, ATSAHH1 | S-adenosyl-L-homocysteine hydrolase | chr4:8054931-8056676 FORWARD LENGTH=485	5	3	3	3	3	2	1	1	0	0	0	1	3	2	1	1	0	0	0	1	3	2	1	1	0	0	0	1	9.5	9.5	9.5	35.531	325	325;485;485;364;440	1	8	0	19.403	By MS/MS	By matching	By MS/MS	By matching	By matching	By matching
AT3G25920.1	AT3G25920.1	2	2	2	>AT3G25920.1 | Symbols: RPL15 | ribosomal protein L15 | chr3:9491268-9492558 REVERSE LENGTH=277	1	2	2	2	2	0	0	1	1	2	2	2	2	0	0	1	1	2	2	2	2	0	0	1	1	2	2	2	9.4	9.4	9.4	29.707	277	277	1	10	0	12.872	By MS/MS	By matching	By matching	By matching	By MS/MS	By MS/MS
AT3G26060.1;AT3G26060.2	AT3G26060.1;AT3G26060.2	9;9	9;9	9;9	>AT3G26060.1 | Symbols: ATPRX Q | Thioredoxin superfamily protein | chr3:9524807-9526123 FORWARD LENGTH=216;>AT3G26060.2 | Symbols: ATPRX Q | Thioredoxin superfamily protein | chr3:9524807-9526123 FORWARD LENGTH=217	2	9	9	9	6	7	9	6	4	5	6	7	6	7	9	6	4	5	6	7	6	7	9	6	4	5	6	7	46.3	46.3	46.3	23.678	216	216;217	1	58	0	138.69	By MS/MS	By MS/MS	By MS/MS	By MS/MS	By MS/MS	By MS/MS
AT3G26070.1;AT3G26080.1	AT3G26070.1	3;1	3;1	3;1	>AT3G26070.1 | Symbols: | Plastid-lipid associated protein PAP / fibrillin family protein | chr3:9526904-9528199 FORWARD LENGTH=242	2	3	3	3	2	2	3	2	0	0	0	1	2	2	3	2	0	0	0	1	2	2	3	2	0	0	0	1	16.1	16.1	16.1	27.163	242	242;234	1	10	0	25.867	By MS/MS	By MS/MS	By MS/MS	By MS/MS	By matching	By matching
AT3G26420.1	AT3G26420.1	4	4	4	>AT3G26420.1 | Symbols: ATRZ-1A | RNA-binding (RRM/RBD/RNP motifs) family protein with retrovirus zinc finger-like domain | chr3:9671953-9673055 FORWARD LENGTH=245	1	4	4	4	3	2	4	4	3	3	3	4	3	2	4	4	3	3	3	4	3	2	4	4	3	3	3	4	13.1	13.1	13.1	26.923	245	245	1	31	0	24.828	By MS/MS	By MS/MS	By MS/MS	By MS/MS	By MS/MS	By MS/MS
AT3G26650.1	AT3G26650.1	14	12	4	>AT3G26650.1 | Symbols: GAPA, GAPA-1 | glyceraldehyde 3-phosphate dehydrogenase A subunit | chr3:9795226-9796848 FORWARD LENGTH=396	1	14	12	4	13	13	14	13	12	14	12	12	11	11	12	11	10	12	10	10	4	4	4	4	3	4	3	3	40.7	33.3	12.6	42.489	396	396	1	98	0	323.31	By MS/MS	By MS/MS	By MS/MS	By MS/MS	By MS/MS	By MS/MS
AT3G27850.1;AT3G27830.1	AT3G27850.1;AT3G27830.1	5;5	5;5	5;5	>AT3G27850.1 | Symbols: RPL12-C | ribosomal protein L12-C | chr3:10324905-10325468 FORWARD LENGTH=187;>AT3G27830.1 | Symbols: RPL12-A, RPL12 | ribosomal protein L12-A | chr3:10318576-10319151 FORWARD LENGTH=191	2	5	5	5	4	3	3	3	5	4	4	5	4	3	3	3	5	4	4	5	4	3	3	3	5	4	4	5	23.5	23.5	23.5	19.682	187	187;191	1	39	0	65.183	By MS/MS	By MS/MS	By MS/MS	By MS/MS	By MS/MS	By MS/MS
AT3G28220.1	AT3G28220.1	4	4	4	>AT3G28220.1 | Symbols: | TRAF-like family protein | chr3:10524420-10526497 FORWARD LENGTH=370	1	4	4	4	3	3	4	3	3	4	3	3	3	3	4	3	3	4	3	3	3	3	4	3	3	4	3	3	8.4	8.4	8.4	42.886	370	370	1	26	0	23.491	By MS/MS	By matching	By matching	By MS/MS	By MS/MS	By MS/MS
AT3G28730.1	AT3G28730.1	15	15	15	>AT3G28730.1 | Symbols: ATHMG, SSRP1, NFD, HMG | high mobility group | chr3:10784954-10788498 FORWARD LENGTH=646	1	15	15	15	14	13	14	14	14	13	14	14	14	13	14	14	14	13	14	14	14	13	14	14	14	13	14	14	26	26	26	71.645	646	646	1	134	0	156.98	By MS/MS	By MS/MS	By MS/MS	By MS/MS	By MS/MS	By MS/MS
AT3G42170.1	AT3G42170.1	2	2	2	>AT3G42170.1 | Symbols: | BED zinc finger ;hAT family dimerisation domain | chr3:14321838-14323928 FORWARD LENGTH=696	1	2	2	2	2	2	1	2	2	2	1	2	2	2	1	2	2	2	1	2	2	2	1	2	2	2	1	2	4	4	4	78.813	696	696	1	14	0	14.293	By MS/MS	By MS/MS	By MS/MS	By MS/MS	By MS/MS	By MS/MS
AT3G44110.2;AT3G44110.1	AT3G44110.2;AT3G44110.1	10;10	2;2	2;2	>AT3G44110.2 | Symbols: ATJ3, ATJ | DNAJ homologue 3 | chr3:15869179-15871059 REVERSE LENGTH=343;>AT3G44110.1 | Symbols: ATJ3, ATJ | DNAJ homologue 3 | chr3:15869115-15871059 REVERSE LENGTH=420	2	10	2	2	10	9	10	10	10	10	10	10	2	2	2	2	2	2	2	2	2	2	2	2	2	2	2	2	26.8	7.3	7.3	37.674	343	343;420	1	27	0	20.833	By MS/MS	By MS/MS	By MS/MS	By matching	By MS/MS	By MS/MS
AT3G44750.2;AT3G44750.1	AT3G44750.2;AT3G44750.1	5;5	5;5	5;5	>AT3G44750.2 | Symbols: HDA3 | histone deacetylase 3 | chr3:16298045-16299585 FORWARD LENGTH=242;>AT3G44750.1 | Symbols: HD2A, ATHD2A, HDA3, HDT1 | histone deacetylase 3 | chr3:16298045-16299585 FORWARD LENGTH=245	2	5	5	5	3	1	4	3	3	3	4	2	3	1	4	3	3	3	4	2	3	1	4	3	3	3	4	2	28.1	28.1	28.1	25.985	242	242;245	1	29	0	33.197	By MS/MS	By MS/MS	By MS/MS	By MS/MS	By MS/MS	By MS/MS
AT3G44890.1	AT3G44890.1	7	7	7	>AT3G44890.1 | Symbols: RPL9 | ribosomal protein L9 | chr3:16386505-16387963 FORWARD LENGTH=197	1	7	7	7	7	7	7	7	4	6	6	7	7	7	7	7	4	6	6	7	7	7	7	7	4	6	6	7	35	35	35	22.134	197	197	1	58	0	54.009	By MS/MS	By MS/MS	By MS/MS	By MS/MS	By MS/MS	By MS/MS
AT3G44990.1	AT3G44990.1	2	2	2	>AT3G44990.1 | Symbols: XTR8, ATXTR8, XTH31 | xyloglucan endo-transglycosylase-related 8 | chr3:16447280-16448678 REVERSE LENGTH=293	1	2	2	2	2	2	2	2	2	2	2	2	2	2	2	2	2	2	2	2	2	2	2	2	2	2	2	2	6.8	6.8	6.8	33.54	293	293	1	22	0	12.061	By MS/MS	By MS/MS	By MS/MS	By MS/MS	By MS/MS	By MS/MS
AT5G62300.2;AT5G62300.1;AT3G45030.1	AT5G62300.2;AT5G62300.1;AT3G45030.1	4;4;4	4;4;4	2;2;2	>AT5G62300.2 | Symbols: | Ribosomal protein S10p/S20e family protein | chr5:25021388-25022235 REVERSE LENGTH=124;>AT5G62300.1 | Symbols: | Ribosomal protein S10p/S20e family protein | chr5:25021388-25022235 REVERSE LENGTH=124;>AT3G45030.1 | Symbols: | R	3	4	4	2	3	3	4	4	4	4	4	4	3	3	4	4	4	4	4	4	1	2	2	2	2	2	2	2	38.7	38.7	18.5	13.878	124	124;124;124	1	44	0	27.651	By MS/MS	By MS/MS	By MS/MS	By MS/MS	By MS/MS	By MS/MS
AT3G46100.1;AT5G03406.1	AT3G46100.1;AT5G03406.1	4;2	4;2	4;2	>AT3G46100.1 | Symbols: ATHRS1, HRS1 | Histidyl-tRNA synthetase 1 | chr3:16928444-16930984 REVERSE LENGTH=486;>AT5G03406.1 | Symbols: | Class II aaRS and biotin synthetases superfamily protein | chr5:839966-841444 FORWARD LENGTH=263	2	4	4	4	4	1	2	2	3	2	2	2	4	1	2	2	3	2	2	2	4	1	2	2	3	2	2	2	8.8	8.8	8.8	54.558	486	486;263	1	18	0	22.948	By MS/MS	By matching	By MS/MS	By MS/MS	By MS/MS	By MS/MS
AT5G59370.2;AT5G59370.1;AT3G46520.1;AT3G12110.1;AT3G53750.1;AT2G37620.2;AT2G37620.1	AT5G59370.2;AT5G59370.1;AT3G46520.1;AT3G12110.1;AT3G53750.1;AT2G37620.2;AT2G37620.1	6;6;6;5;4;4;4	6;6;6;5;4;4;4	2;2;2;1;1;1;1	>AT5G59370.2 | Symbols: ACT4 | actin 4 | chr5:23950109-23951586 FORWARD LENGTH=377;>AT5G59370.1 | Symbols: ACT4 | actin 4 | chr5:23950109-23951586 FORWARD LENGTH=377;>AT3G46520.1 | Symbols: ACT12 | actin-12 | chr3:17128567-17129981 FORWARD LENGTH=377;>AT3G	7	6	6	2	6	5	4	5	6	6	5	5	6	5	4	5	6	6	5	5	2	1	1	1	2	2	1	1	23.6	23.6	10.3	41.778	377	377;377;377;377;377;377;377	1	71	0	247.78	By MS/MS	By MS/MS	By MS/MS	By MS/MS	By MS/MS	By MS/MS
AT3G46740.1	AT3G46740.1	10	10	10	>AT3G46740.1 | Symbols: TOC75-III, MAR1 | translocon at the outer envelope membrane of chloroplasts 75-III | chr3:17216104-17219296 REVERSE LENGTH=818	1	10	10	10	9	5	8	9	7	4	7	7	9	5	8	9	7	4	7	7	9	5	8	9	7	4	7	7	16.5	16.5	16.5	89.188	818	818	1	64	0	81.055	By MS/MS	By MS/MS	By MS/MS	By MS/MS	By MS/MS	By matching
AT3G46780.1	AT3G46780.1	26	26	26	>AT3G46780.1 | Symbols: PTAC16 | plastid transcriptionally active 16 | chr3:17228766-17231021 FORWARD LENGTH=510	1	26	26	26	23	21	22	21	19	19	21	20	23	21	22	21	19	19	21	20	23	21	22	21	19	19	21	20	56.7	56.7	56.7	54.358	510	510	1	197	0	323.31	By MS/MS	By MS/MS	By MS/MS	By MS/MS	By MS/MS	By MS/MS
AT3G47470.1	AT3G47470.1	2	2	2	>AT3G47470.1 | Symbols: LHCA4, CAB4 | light-harvesting chlorophyll-protein complex I subunit A4 | chr3:17493622-17494773 REVERSE LENGTH=251	1	2	2	2	2	1	2	2	1	1	2	2	2	1	2	2	1	1	2	2	2	1	2	2	1	1	2	2	10.4	10.4	10.4	27.733	251	251	1	13	0	14.908	By MS/MS	By matching	By MS/MS	By MS/MS	By MS/MS	By MS/MS
AT3G47800.1	AT3G47800.1	6	6	6	>AT3G47800.1 | Symbols: | Galactose mutarotase-like superfamily protein | chr3:17634971-17636998 FORWARD LENGTH=358	1	6	6	6	5	6	6	5	5	6	5	5	5	6	6	5	5	6	5	5	5	6	6	5	5	6	5	5	20.7	20.7	20.7	39.714	358	358	1	43	0	50.451	By MS/MS	By MS/MS	By MS/MS	By MS/MS	By MS/MS	By MS/MS
AT3G48500.1;AT3G48500.2	AT3G48500.1;AT3G48500.2	5;5	5;5	5;5	>AT3G48500.1 | Symbols: PDE312, PTAC10 | Nucleic acid-binding, OB-fold-like protein | chr3:17962209-17965408 FORWARD LENGTH=668;>AT3G48500.2 | Symbols: PDE312, PTAC10 | Nucleic acid-binding, OB-fold-like protein | chr3:17962209-17965408 FORWARD LENGTH=697	2	5	5	5	4	3	3	2	4	4	5	5	4	3	3	2	4	4	5	5	4	3	3	2	4	4	5	5	8.1	8.1	8.1	78.813	668	668;697	1	30	0	32.013	By matching	By matching	By matching	By MS/MS	By MS/MS	By MS/MS
AT3G49430.2;AT3G49430.3;AT3G49430.1	AT3G49430.2;AT3G49430.3;AT3G49430.1	3;3;3	2;2;2	2;2;2	>AT3G49430.2 | Symbols: SRp34a, SR34a, At-SR34a | SER/ARG-rich protein 34A | chr3:18332668-18334617 FORWARD LENGTH=297;>AT3G49430.3 | Symbols: SRp34a, SR34a, At-SR34a | SER/ARG-rich protein 34A | chr3:18332668-18334829 FORWARD LENGTH=300;>AT3G49430.1 | Sym	3	3	2	2	3	3	2	2	3	3	3	3	2	2	1	1	2	2	2	2	2	2	1	1	2	2	2	2	10.1	7.4	7.4	33.462	297	297;300;300	1	17	0	13.324	By MS/MS	By matching	By MS/MS	By matching	By MS/MS	By MS/MS
AT3G50670.1	AT3G50670.1	5	5	5	>AT3G50670.1 | Symbols: U1-70K, U1SNRNP | U1 small nuclear ribonucleoprotein-70K | chr3:18826476-18829492 REVERSE LENGTH=427	1	5	5	5	0	0	2	2	3	2	1	4	0	0	2	2	3	2	1	4	0	0	2	2	3	2	1	4	15.5	15.5	15.5	50.388	427	427	1	14	0	49.737	By matching	By matching	By matching	By MS/MS	By MS/MS	By MS/MS
AT3G50820.1	AT3G50820.1	9	2	2	>AT3G50820.1 | Symbols: PSBO2, PSBO-2, OEC33 | photosystem II subunit O-2 | chr3:18891008-18892311 REVERSE LENGTH=331	1	9	2	2	9	4	9	5	4	5	3	4	2	0	2	1	0	0	0	0	2	0	2	1	0	0	0	0	32.9	7.9	7.9	35.019	331	331	1	6	0.0012626	11.091	By MS/MS	By matching	By matching	By matching	By matching	By matching
AT3G51140.1	AT3G51140.1	2	2	2	>AT3G51140.1 | Symbols: | Protein of unknown function (DUF3353) | chr3:18998182-18999437 FORWARD LENGTH=278	1	2	2	2	2	2	2	2	1	1	2	2	2	2	2	2	1	1	2	2	2	2	2	2	1	1	2	2	6.8	6.8	6.8	31.535	278	278	1	20	0	12.034	By MS/MS	By MS/MS	By MS/MS	By MS/MS	By MS/MS	By matching
AT3G51800.3;AT3G51800.1;AT3G51800.2	AT3G51800.3;AT3G51800.1;AT3G51800.2	6;6;6	6;6;6	6;6;6	>AT3G51800.3 | Symbols: ATG2 | metallopeptidase M24 family protein | chr3:19211261-19213568 REVERSE LENGTH=385;>AT3G51800.1 | Symbols: ATG2, EBP1, ATEBP1 | metallopeptidase M24 family protein | chr3:19211261-19213568 REVERSE LENGTH=392;>AT3G51800.2 | Symbo	3	6	6	6	5	4	6	5	4	4	4	6	5	4	6	5	4	4	4	6	5	4	6	5	4	4	4	6	18.4	18.4	18.4	42.295	385	385;392;401	1	49	0	40.847	By MS/MS	By MS/MS	By MS/MS	By MS/MS	By MS/MS	By MS/MS
AT3G52140.3;AT3G52140.1;AT3G52140.2;AT3G52140.4	AT3G52140.3;AT3G52140.1;AT3G52140.2;AT3G52140.4	10;10;10;10	10;10;10;10	10;10;10;10	>AT3G52140.3 | Symbols: | tetratricopeptide repeat (TPR)-containing protein | chr3:19333232-19341295 FORWARD LENGTH=1396;>AT3G52140.1 | Symbols: | tetratricopeptide repeat (TPR)-containing protein | chr3:19333232-19341295 FORWARD LENGTH=1403;>AT3G52140.2	4	10	10	10	8	5	9	7	8	7	7	7	8	5	9	7	8	7	7	7	8	5	9	7	8	7	7	7	10.4	10.4	10.4	152.52	1396	1396;1403;1407;1419	1	62	0	70.582	By MS/MS	By MS/MS	By MS/MS	By MS/MS	By MS/MS	By MS/MS
AT3G52150.2;AT3G52150.1	AT3G52150.2;AT3G52150.1	6;6	6;6	6;6	>AT3G52150.2 | Symbols: | RNA-binding (RRM/RBD/RNP motifs) family protein | chr3:19342074-19343090 FORWARD LENGTH=253;>AT3G52150.1 | Symbols: | RNA-binding (RRM/RBD/RNP motifs) family protein | chr3:19342074-19343090 FORWARD LENGTH=253	2	6	6	6	6	6	6	6	6	6	6	6	6	6	6	6	6	6	6	6	6	6	6	6	6	6	6	6	30.8	30.8	30.8	27.748	253	253;253	1	59	0	175.99	By MS/MS	By MS/MS	By MS/MS	By MS/MS	By MS/MS	By MS/MS
AT3G52500.1	AT3G52500.1	3	3	3	>AT3G52500.1 | Symbols: | Eukaryotic aspartyl protease family protein | chr3:19465644-19467053 REVERSE LENGTH=469	1	3	3	3	3	3	2	2	3	3	3	3	3	3	2	2	3	3	3	3	3	3	2	2	3	3	3	3	6.4	6.4	6.4	51.004	469	469	1	22	0	18.381	By matching	By matching	By matching	By matching	By MS/MS	By MS/MS
AT3G52720.2;AT3G52720.1	AT3G52720.2;AT3G52720.1	2;2	2;2	2;2	>AT3G52720.2 | Symbols: CAH1, ATACA1, ACA1 | alpha carbonic anhydrase 1 | chr3:19539617-19541116 REVERSE LENGTH=230;>AT3G52720.1 | Symbols: CAH1, ATACA1, ACA1 | alpha carbonic anhydrase 1 | chr3:19538804-19541116 REVERSE LENGTH=284	2	2	2	2	1	1	2	2	0	2	1	1	1	1	2	2	0	2	1	1	1	1	2	2	0	2	1	1	9.1	9.1	9.1	26.353	230	230;284	1	10	0	11.347	By matching	By matching	By MS/MS	By matching	By matching	By matching
AT3G52930.1;AT5G03690.2;AT5G03690.1	AT3G52930.1	18;3;2	18;3;2	12;0;0	>AT3G52930.1 | Symbols: | Aldolase superfamily protein | chr3:19627383-19628874 REVERSE LENGTH=358	3	18	18	12	18	15	17	17	17	16	17	17	18	15	17	17	17	16	17	17	12	9	11	11	11	11	11	11	62.6	62.6	39.7	38.539	358	358;359;393	1	191	0	323.31	By MS/MS	By MS/MS	By MS/MS	By MS/MS	By MS/MS	By MS/MS
AT3G53420.2;AT3G53420.1	AT3G53420.2;AT3G53420.1	6;6	6;6	4;4	>AT3G53420.2 | Symbols: PIP2A, PIP2, PIP2;1 | plasma membrane intrinsic protein 2A | chr3:19803906-19805454 REVERSE LENGTH=287;>AT3G53420.1 | Symbols: PIP2A, PIP2, PIP2;1 | plasma membrane intrinsic protein 2A | chr3:19803906-19805454 REVERSE LENGTH=287	2	6	6	4	3	4	6	4	4	2	5	5	3	4	6	4	4	2	5	5	1	2	4	2	2	0	3	3	18.1	18.1	11.5	30.474	287	287;287	1	33	0	39.705	By MS/MS	By MS/MS	By MS/MS	By MS/MS	By MS/MS	By MS/MS
AT3G53430.1;AT2G37190.1;AT5G60670.1	AT3G53430.1;AT2G37190.1;AT5G60670.1	5;4;3	5;4;3	5;4;3	>AT3G53430.1 | Symbols: | Ribosomal protein L11 family protein | chr3:19809895-19810395 REVERSE LENGTH=166;>AT2G37190.1 | Symbols: | Ribosomal protein L11 family protein | chr2:15619559-15620059 REVERSE LENGTH=166;>AT5G60670.1 | Symbols: | Ribosomal pro	3	5	5	5	5	5	5	4	4	3	2	5	5	5	5	4	4	3	2	5	5	5	5	4	4	3	2	5	41	41	41	17.97	166	166;166;166	1	33	0	42.679	By MS/MS	By MS/MS	By MS/MS	By MS/MS	By MS/MS	By MS/MS
AT3G53460.3;AT3G53460.2;AT3G53460.1;AT3G53460.4	AT3G53460.3;AT3G53460.2;AT3G53460.1;AT3G53460.4	5;5;5;5	3;3;3;3	3;3;3;3	>AT3G53460.3 | Symbols: CP29 | chloroplast RNA-binding protein 29 | chr3:19819738-19821423 REVERSE LENGTH=342;>AT3G53460.2 | Symbols: CP29 | chloroplast RNA-binding protein 29 | chr3:19819738-19821423 REVERSE LENGTH=342;>AT3G53460.1 | Symbols: CP29 | chlor	4	5	3	3	4	3	4	3	5	4	4	4	2	2	2	1	3	2	2	2	2	2	2	1	3	2	2	2	19	13.5	13.5	36.007	342	342;342;342;363	1	16	0	41.074	By MS/MS	By MS/MS	By MS/MS	By MS/MS	By MS/MS	By MS/MS
AT3G54050.2;AT3G54050.1	AT3G54050.2;AT3G54050.1	4;4	4;4	4;4	>AT3G54050.2 | Symbols: HCEF1 | high cyclic electron flow 1 | chr3:20016951-20018527 FORWARD LENGTH=417;>AT3G54050.1 | Symbols: HCEF1 | high cyclic electron flow 1 | chr3:20016951-20018527 FORWARD LENGTH=417	2	4	4	4	4	1	2	1	0	0	1	1	4	1	2	1	0	0	1	1	4	1	2	1	0	0	1	1	11.5	11.5	11.5	45.161	417	417;417	1	10	0	24.196	By MS/MS	By matching	By matching	By matching	By matching	By matching
AT3G54090.1	AT3G54090.1	4	4	4	>AT3G54090.1 | Symbols: FLN1 | fructokinase-like 1 | chr3:20028145-20029835 FORWARD LENGTH=471	1	4	4	4	2	0	1	1	3	4	3	3	2	0	1	1	3	4	3	3	2	0	1	1	3	4	3	3	10.8	10.8	10.8	53.78	471	471	1	17	0	27.185	By MS/MS	By matching	By matching	By matching	By MS/MS	By MS/MS
AT3G54400.1	AT3G54400.1	9	9	9	>AT3G54400.1 | Symbols: | Eukaryotic aspartyl protease family protein | chr3:20140291-20142599 REVERSE LENGTH=425	1	9	9	9	7	8	8	8	9	9	8	9	7	8	8	8	9	9	8	9	7	8	8	8	9	9	8	9	20.9	20.9	20.9	45.475	425	425	1	76	0	85.048	By MS/MS	By MS/MS	By MS/MS	By MS/MS	By MS/MS	By MS/MS
AT3G54540.1	AT3G54540.1	7	7	7	>AT3G54540.1 | Symbols: ATGCN4, GCN4 | general control non-repressible 4 | chr3:20190393-20192564 FORWARD LENGTH=723	1	7	7	7	4	3	7	6	2	3	2	4	4	3	7	6	2	3	2	4	4	3	7	6	2	3	2	4	11.9	11.9	11.9	80.48	723	723	1	31	0	44.656	By MS/MS	By MS/MS	By MS/MS	By MS/MS	By MS/MS	By MS/MS
AT3G54670.1;AT3G54670.3;AT3G54670.2	AT3G54670.1;AT3G54670.3	15;15;5	15;15;5	15;15;5	>AT3G54670.1 | Symbols: TTN8, SMC1, ATSMC1 | Structural maintenance of chromosomes (SMC) family protein | chr3:20235818-20243701 FORWARD LENGTH=1238;>AT3G54670.3 | Symbols: TTN8 | Structural maintenance of chromosomes (SMC) family protein | chr3:20235818-2	3	15	15	15	15	8	13	14	8	7	11	8	15	8	13	14	8	7	11	8	15	8	13	14	8	7	11	8	13.7	13.7	13.7	143.21	1238	1238;1239;453	1	85	0	108.95	By MS/MS	By MS/MS	By MS/MS	By MS/MS	By MS/MS	By MS/MS
AT3G54890.4;AT3G54890.1	AT3G54890.4;AT3G54890.1	2;2	2;2	2;2	>AT3G54890.4 | Symbols: LHCA1 | photosystem I light harvesting complex gene 1 | chr3:20339881-20340922 REVERSE LENGTH=213;>AT3G54890.1 | Symbols: LHCA1 | photosystem I light harvesting complex gene 1 | chr3:20339706-20340922 REVERSE LENGTH=241	2	2	2	2	2	1	2	1	1	1	1	1	2	1	2	1	1	1	1	1	2	1	2	1	1	1	1	1	6.6	6.6	6.6	23.262	213	213;241	1	10	0	12.198	By MS/MS	By matching	By matching	By matching	By matching	By matching
AT3G55220.1;AT3G55200.1	AT3G55220.1;AT3G55200.1	14;14	14;14	14;14	>AT3G55220.1 | Symbols: | Cleavage and polyadenylation specificity factor (CPSF) A subunit protein | chr3:20467116-20470944 REVERSE LENGTH=1214;>AT3G55200.1 | Symbols: | Cleavage and polyadenylation specificity factor (CPSF) A subunit protein | chr3:2046	2	14	14	14	9	7	9	9	12	10	14	14	9	7	9	9	12	10	14	14	9	7	9	9	12	10	14	14	13.4	13.4	13.4	134.97	1214	1214;1214	1	96	0	184.94	By MS/MS	By MS/MS	By MS/MS	By MS/MS	By MS/MS	By MS/MS
AT3G55410.1;AT5G65750.1	AT3G55410.1;AT5G65750.1	2;1	2;1	2;1	>AT3G55410.1 | Symbols: | 2-oxoglutarate dehydrogenase, E1 component | chr3:20541897-20545728 FORWARD LENGTH=1017;>AT5G65750.1 | Symbols: | 2-oxoglutarate dehydrogenase, E1 component | chr5:26304212-26307947 FORWARD LENGTH=1025	2	2	2	2	1	0	2	2	1	1	1	2	1	0	2	2	1	1	1	2	1	0	2	2	1	1	1	2	2.8	2.8	2.8	115.16	1017	1017;1025	1	10	0.0012788	11.245	By matching	By matching	By MS/MS	By MS/MS	By matching	By matching
AT3G55430.1	AT3G55430.1	12	12	12	>AT3G55430.1 | Symbols: | O-Glycosyl hydrolases family 17 protein | chr3:20549806-20552004 REVERSE LENGTH=449	1	12	12	12	9	8	12	8	12	12	12	12	9	8	12	8	12	12	12	12	9	8	12	8	12	12	12	12	32.3	32.3	32.3	48.442	449	449	1	106	0	132.14	By MS/MS	By MS/MS	By MS/MS	By MS/MS	By MS/MS	By MS/MS
AT3G56460.1	AT3G56460.1	8	8	8	>AT3G56460.1 | Symbols: | GroES-like zinc-binding alcohol dehydrogenase family protein | chr3:20933029-20934425 REVERSE LENGTH=348	1	8	8	8	8	8	7	7	6	8	5	7	8	8	7	7	6	8	5	7	8	8	7	7	6	8	5	7	33	33	33	37.265	348	348	1	68	0	117.84	By MS/MS	By MS/MS	By MS/MS	By MS/MS	By MS/MS	By MS/MS
AT3G56940.1;AT3G56940.2	AT3G56940.1;AT3G56940.2	12;11	12;11	12;11	>AT3G56940.1 | Symbols: CRD1, CHL27, ACSF | dicarboxylate diiron protein, putative (Crd1) | chr3:21076594-21078269 FORWARD LENGTH=409;>AT3G56940.2 | Symbols: CRD1 | dicarboxylate diiron protein, putative (Crd1) | chr3:21076825-21078269 FORWARD LENGTH=332	2	12	12	12	12	11	12	12	11	10	11	10	12	11	12	12	11	10	11	10	12	11	12	12	11	10	11	10	30.8	30.8	30.8	47.63	409	409;332	1	103	0	107.05	By MS/MS	By MS/MS	By MS/MS	By MS/MS	By MS/MS	By MS/MS
AT3G57290.1	AT3G57290.1	8	8	8	>AT3G57290.1 | Symbols: EIF3E, TIF3E1, ATEIF3E-1, INT-6, ATINT6, INT6 | eukaryotic translation initiation factor 3E | chr3:21196786-21199073 REVERSE LENGTH=441	1	8	8	8	6	7	8	7	5	5	6	7	6	7	8	7	5	5	6	7	6	7	8	7	5	5	6	7	24	24	24	51.749	441	441	1	51	0	49.791	By MS/MS	By MS/MS	By MS/MS	By MS/MS	By matching	By MS/MS
AT3G57560.1	AT3G57560.1	6	6	6	>AT3G57560.1 | Symbols: NAGK | N-acetyl-l-glutamate kinase | chr3:21311164-21312207 REVERSE LENGTH=347	1	6	6	6	5	5	6	5	4	4	4	4	5	5	6	5	4	4	4	4	5	5	6	5	4	4	4	4	23.1	23.1	23.1	36.595	347	347	1	42	0	67.489	By MS/MS	By MS/MS	By MS/MS	By MS/MS	By MS/MS	By MS/MS
AT3G58510.3;AT3G58510.2;AT3G58510.1	AT3G58510.3;AT3G58510.2;AT3G58510.1	12;12;12	7;7;7	7;7;7	>AT3G58510.3 | Symbols: | DEA(D/H)-box RNA helicase family protein | chr3:21640608-21643464 FORWARD LENGTH=612;>AT3G58510.2 | Symbols: | DEA(D/H)-box RNA helicase family protein | chr3:21640608-21643464 FORWARD LENGTH=612;>AT3G58510.1 | Symbols: | DEA(D	3	12	7	7	11	11	11	11	9	10	10	10	6	6	6	7	4	5	5	5	6	6	6	7	4	5	5	5	23.4	14.4	14.4	66.025	612	612;612;612	1	50	0	50.109	By MS/MS	By MS/MS	By MS/MS	By MS/MS	By MS/MS	By MS/MS
AT3G60190.1;AT2G44590.2;AT2G44590.1;AT2G44590.3	AT3G60190.1;AT2G44590.2;AT2G44590.1;AT2G44590.3	6;3;3;3	6;3;3;3	3;2;2;2	>AT3G60190.1 | Symbols: ADL4, ADLP2, EDR3, DRP1E, ADL1E, DL1E | DYNAMIN-like 1E | chr3:22244367-22247651 REVERSE LENGTH=624;>AT2G44590.2 | Symbols: | DYNAMIN-like 1D | chr2:18403856-18406961 REVERSE LENGTH=595;>AT2G44590.1 | Symbols: ADL1D, DL1D | DYNAMIN	4	6	6	3	6	4	5	5	6	5	6	6	6	4	5	5	6	5	6	6	3	2	3	3	3	2	3	3	9.3	9.3	4.5	69.803	624	624;595;596;612	1	44	0	38.112	By MS/MS	By matching	By matching	By MS/MS	By MS/MS	By MS/MS
AT3G60750.2;AT3G60750.1;AT2G45290.1	AT3G60750.2;AT3G60750.1	14;14;5	14;14;5	14;14;5	>AT3G60750.2 | Symbols: | Transketolase | chr3:22454004-22456824 FORWARD LENGTH=740;>AT3G60750.1 | Symbols: | Transketolase | chr3:22454004-22456824 FORWARD LENGTH=741	3	14	14	14	14	1	10	5	1	1	4	2	14	1	10	5	1	1	4	2	14	1	10	5	1	1	4	2	25.8	25.8	25.8	79.838	740	740;741;741	1	40	0	94.244	By MS/MS	By matching	By MS/MS	By matching	By matching	By matching
AT3G60830.1	AT3G60830.1	4	4	4	>AT3G60830.1 | Symbols: ATARP7, ARP7 | actin-related protein 7 | chr3:22474298-22476000 FORWARD LENGTH=363	1	4	4	4	4	2	4	3	4	4	4	3	4	2	4	3	4	4	4	3	4	2	4	3	4	4	4	3	14.3	14.3	14.3	39.904	363	363	1	28	0	24.92	By MS/MS	By matching	By matching	By MS/MS	By MS/MS	By MS/MS
AT3G61240.2;AT3G61240.1	AT3G61240.2;AT3G61240.1	8;8	8;8	3;3	>AT3G61240.2 | Symbols: | DEA(D/H)-box RNA helicase family protein | chr3:22666590-22669154 FORWARD LENGTH=498;>AT3G61240.1 | Symbols: | DEA(D/H)-box RNA helicase family protein | chr3:22666590-22669154 FORWARD LENGTH=498	2	8	8	3	6	6	8	8	7	7	8	8	6	6	8	8	7	7	8	8	1	2	3	3	3	3	3	3	20.3	20.3	7.4	56.774	498	498;498	1	65	0	58.525	By MS/MS	By MS/MS	By MS/MS	By MS/MS	By MS/MS	By MS/MS
AT3G61820.1	AT3G61820.1	3	3	3	>AT3G61820.1 | Symbols: | Eukaryotic aspartyl protease family protein | chr3:22880074-22881525 REVERSE LENGTH=483	1	3	3	3	1	3	2	2	2	1	3	3	1	3	2	2	2	1	3	3	1	3	2	2	2	1	3	3	6.6	6.6	6.6	51.461	483	483	1	17	0	18.697	By MS/MS	By matching	By matching	By MS/MS	By MS/MS	By matching
AT3G62120.2;AT3G62120.1	AT3G62120.2;AT3G62120.1	15;15	15;15	15;15	>AT3G62120.2 | Symbols: | Class II aaRS and biotin synthetases superfamily protein | chr3:23001227-23003849 REVERSE LENGTH=530;>AT3G62120.1 | Symbols: | Class II aaRS and biotin synthetases superfamily protein | chr3:23001227-23003849 REVERSE LENGTH=530	2	15	15	15	15	13	15	13	9	13	13	14	15	13	15	13	9	13	13	14	15	13	15	13	9	13	13	14	34	34	34	60.755	530	530;530	1	142	0	138.67	By MS/MS	By MS/MS	By MS/MS	By MS/MS	By MS/MS	By MS/MS
AT3G62600.1	AT3G62600.1	5	5	5	>AT3G62600.1 | Symbols: ATERDJ3B, ERDJ3B | DNAJ heat shock family protein | chr3:23151038-23153346 REVERSE LENGTH=346	1	5	5	5	4	4	3	4	4	4	5	4	4	4	3	4	4	4	5	4	4	4	3	4	4	4	5	4	18.5	18.5	18.5	39.199	346	346	1	35	0	38.607	By MS/MS	By MS/MS	By MS/MS	By MS/MS	By MS/MS	By MS/MS
AT3G63140.1	AT3G63140.1	14	14	14	>AT3G63140.1 | Symbols: CSP41A | chloroplast stem-loop binding protein of 41 kDa | chr3:23327006-23328620 REVERSE LENGTH=406	1	14	14	14	14	13	14	14	13	14	14	13	14	13	14	14	13	14	14	13	14	13	14	14	13	14	14	13	41.4	41.4	41.4	43.929	406	406	1	186	0	323.31	By MS/MS	By MS/MS	By MS/MS	By MS/MS	By MS/MS	By MS/MS
AT3G63490.1;AT3G63490.2	AT3G63490.1;AT3G63490.2	8;6	8;6	8;6	>AT3G63490.1 | Symbols: | Ribosomal protein L1p/L10e family | chr3:23444269-23446020 FORWARD LENGTH=346;>AT3G63490.2 | Symbols: | Ribosomal protein L1p/L10e family | chr3:23444269-23445777 FORWARD LENGTH=291	2	8	8	8	8	6	7	7	7	6	5	5	8	6	7	7	7	6	5	5	8	6	7	7	7	6	5	5	26.9	26.9	26.9	37.632	346	346;291	1	61	0	64.623	By MS/MS	By MS/MS	By MS/MS	By MS/MS	By MS/MS	By MS/MS
AT4G01050.1	AT4G01050.1	9	9	9	>AT4G01050.1 | Symbols: TROL | thylakoid rhodanese-like | chr4:455874-458175 FORWARD LENGTH=466	1	9	9	9	7	9	8	7	6	7	8	6	7	9	8	7	6	7	8	6	7	9	8	7	6	7	8	6	21.9	21.9	21.9	49.387	466	466	1	69	0	66.95	By MS/MS	By MS/MS	By MS/MS	By MS/MS	By MS/MS	By MS/MS
AT4G01130.1	AT4G01130.1	3	3	3	>AT4G01130.1 | Symbols: | GDSL-like Lipase/Acylhydrolase superfamily protein | chr4:485868-488007 FORWARD LENGTH=382	1	3	3	3	2	2	3	3	3	3	2	2	2	2	3	3	3	3	2	2	2	2	3	3	3	3	2	2	8.9	8.9	8.9	42.013	382	382	1	31	0	34.618	By MS/MS	By MS/MS	By MS/MS	By MS/MS	By MS/MS	By MS/MS
AT4G01310.1	AT4G01310.1	9	9	9	>AT4G01310.1 | Symbols: | Ribosomal L5P family protein | chr4:544166-545480 REVERSE LENGTH=262	1	9	9	9	7	7	6	7	8	8	8	8	7	7	6	7	8	8	8	8	7	7	6	7	8	8	8	8	35.9	35.9	35.9	28.343	262	262	1	65	0	54.553	By MS/MS	By MS/MS	By matching	By MS/MS	By MS/MS	By MS/MS
AT4G02510.1	AT4G02510.1	4	4	4	>AT4G02510.1 | Symbols: TOC159, TOC86, PPI2, TOC160, ATTOC159 | translocon at the outer envelope membrane of chloroplasts 159 | chr4:1104766-1109360 FORWARD LENGTH=1503	1	4	4	4	3	2	3	2	3	2	2	2	3	2	3	2	3	2	2	2	3	2	3	2	3	2	2	2	3.3	3.3	3.3	160.82	1503	1503	1	19	0	24.433	By MS/MS	By matching	By MS/MS	By MS/MS	By MS/MS	By MS/MS
AT4G02770.1;AT1G03130.1	AT4G02770.1;AT1G03130.1	6;5	6;5	6;5	>AT4G02770.1 | Symbols: PSAD-1 | photosystem I subunit D-1 | chr4:1229247-1229873 REVERSE LENGTH=208;>AT1G03130.1 | Symbols: PSAD-2 | photosystem I subunit D-2 | chr1:753528-754142 REVERSE LENGTH=204	2	6	6	6	6	6	6	5	6	5	6	5	6	6	6	5	6	5	6	5	6	6	6	5	6	5	6	5	42.8	42.8	42.8	22.598	208	208;204	1	60	0	72.098	By MS/MS	By MS/MS	By MS/MS	By MS/MS	By MS/MS	By MS/MS
AT4G02840.1;AT4G02840.2	AT4G02840.1;AT4G02840.2	3;3	3;3	2;2	>AT4G02840.1 | Symbols: | Small nuclear ribonucleoprotein family protein | chr4:1264726-1266253 FORWARD LENGTH=116;>AT4G02840.2 | Symbols: | Small nuclear ribonucleoprotein family protein | chr4:1264726-1266253 FORWARD LENGTH=126	2	3	3	2	3	1	1	2	3	3	3	3	3	1	1	2	3	3	3	3	2	1	1	1	2	2	2	2	20.7	20.7	11.2	12.75	116	116;126	1	24	0	23.199	By MS/MS	By matching	By MS/MS	By MS/MS	By MS/MS	By MS/MS
AT4G03280.2;AT4G03280.1	AT4G03280.2;AT4G03280.1	3;3	3;3	3;3	>AT4G03280.2 | Symbols: PETC, PGR1 | photosynthetic electron transfer C | chr4:1440462-1441717 FORWARD LENGTH=210;>AT4G03280.1 | Symbols: PETC, PGR1 | photosynthetic electron transfer C | chr4:1440314-1441717 FORWARD LENGTH=229	2	3	3	3	3	3	3	3	3	2	2	2	3	3	3	3	3	2	2	2	3	3	3	3	3	2	2	2	21.4	21.4	21.4	22.533	210	210;229	1	21	0	28.771	By MS/MS	By MS/MS	By MS/MS	By MS/MS	By MS/MS	By MS/MS
[truncated: 245 more rows]
[truncated: 84 more columns]
