# Supplementary material for: Identification of Pri-miRNA Stem-Loop Interacting Proteins in Plants Using a Modified Version of the Csy4 CRISPR Endonuclease
Source: Int J Mol Sci. 2022 Aug 11;23(16):8961. doi: 10.3390/ijms23168961 (PMC9409100; doi:10.3390/ijms23168961)
Supplement: Supplementary file 1 [file ijms-23-08961-s001.zip › Table S3.xlsx]

## Sheet: GO His6-MBP-Csy4
His6-MBP-Csy4* significantly enriched
GO MF	p-value	number	AGIs	GO
mRNA binding	9.22547e-12	26	AT1G09340,AT1G15820,AT1G42970,AT1G48410,AT2G34420,AT2G35410,AT2G36460,AT2G37220,AT2G40290,AT3G08940,AT3G26060,AT3G26420,AT3G51800,AT3G53460,AT3G56940,AT3G63140,AT4G10340,AT4G20360,AT4G24770,AT4G34110,AT4G37930,AT5G01530,AT5G24490,AT5G30510,AT5G60390,AT5G61780	GO:0003729
RNA binding	1.21793e-06	27	AT1G04170,AT1G09340,AT1G15820,AT1G42970,AT1G48410,AT2G34420,AT2G35410,AT2G36460,AT2G37220,AT2G40290,AT3G08940,AT3G26060,AT3G26420,AT3G51800,AT3G53460,AT3G56940,AT3G63140,AT4G10340,AT4G20360,AT4G24770,AT4G34110,AT4G37930,AT5G01530,AT5G24490,AT5G30510,AT5G60390,AT5G61780	GO:0003723
poly(U) RNA binding	7.71087e-05	6	AT2G37220,AT3G53460,AT3G63140,AT4G24770,AT4G34110,AT4G37930	GO:0008266
poly-pyrimidine tract binding	0.000165272	6	AT2G37220,AT3G53460,AT3G63140,AT4G24770,AT4G34110,AT4G37930	GO:0008187
chlorophyll binding	0.000319277	5	AT1G15820,AT2G34420,AT3G08940,AT4G10340,AT5G01530	GO:0016168
single-stranded RNA binding	0.00747837	6	AT2G37220,AT3G53460,AT3G63140,AT4G24770,AT4G34110,AT4G37930	GO:0003727
protease binding	0.0195099	3	AT1G72150,AT1G78900,AT3G09260	GO:0002020
GO BP	p-value	number	AGIs	GO
photosynthesis, light harvesting	0.00109262	5	AT1G15820,AT2G34420,AT3G08940,AT4G10340,AT5G01530	GO:0009765
posttranscriptional regulation of gene expression	0.00152359	9	AT1G04170,AT1G09340,AT1G11580,AT1G48410,AT3G53460,AT3G63140,AT4G24770,AT4G34110,AT5G24490	GO:0010608
photosynthesis, light harvesting in photosystem I	0.00578407	5	AT1G15820,AT2G34420,AT3G08940,AT4G10340,AT5G01530	GO:0009768
protein-chromophore linkage	0.00688642	5	AT1G15820,AT2G34420,AT3G08940,AT4G10340,AT5G01530	GO:0018298
regulation of translation	0.011886	7	AT1G04170,AT1G09340,AT1G11580,AT1G48410,AT3G63140,AT4G34110,AT5G24490	GO:0006417
organonitrogen compound biosynthetic process	0.012202	18	AT1G03630,AT1G04170,AT1G09340,AT1G11580,AT1G48410,AT2G38040,AT2G42910,AT3G56940,AT3G62120,AT3G63140,AT4G11010,AT4G20360,AT4G34110,AT4G35630,AT4G37930,AT5G24490,AT5G30510,AT5G60390	GO:1901566
regulation of cellular amide metabolic process	0.0128576	7	AT1G04170,AT1G09340,AT1G11580,AT1G48410,AT3G63140,AT4G34110,AT5G24490	GO:0034248
photosynthesis	0.0239939	8	AT1G03630,AT1G15820,AT1G42970,AT2G34420,AT3G08940,AT3G56940,AT4G10340,AT5G01530	GO:0015979
amide biosynthetic process	0.0390065	12	AT1G04170,AT1G09340,AT1G11580,AT1G48410,AT2G38040,AT3G62120,AT3G63140,AT4G20360,AT4G34110,AT5G24490,AT5G30510,AT5G60390	GO:0043604
GO CC	p-value	number	AGIs	GO
thylakoid	2.92308e-12	20	AT1G03630,AT1G15820,AT1G42970,AT2G01140,AT2G34420,AT2G35410,AT2G37220,AT3G08940,AT3G26060,AT3G53460,AT3G56940,AT3G63140,AT4G10340,AT4G11010,AT4G20360,AT4G24770,AT4G37930,AT5G01530,AT5G24490,AT5G30510	GO:0009579
chloroplast thylakoid	7.20517e-11	18	AT1G03630,AT1G15820,AT1G42970,AT2G01140,AT2G34420,AT2G37220,AT3G08940,AT3G26060,AT3G53460,AT3G56940,AT3G63140,AT4G10340,AT4G11010,AT4G20360,AT4G24770,AT4G37930,AT5G01530,AT5G24490	GO:0009534
plastid thylakoid	7.44457e-11	18	AT1G03630,AT1G15820,AT1G42970,AT2G01140,AT2G34420,AT2G37220,AT3G08940,AT3G26060,AT3G53460,AT3G56940,AT3G63140,AT4G10340,AT4G11010,AT4G20360,AT4G24770,AT4G37930,AT5G01530,AT5G24490	GO:0031976
plastid envelope	1.64922e-08	19	AT1G03630,AT1G09340,AT1G15820,AT1G42970,AT1G78900,AT2G34420,AT2G37220,AT2G38040,AT3G08940,AT3G26060,AT3G53460,AT3G56940,AT3G63140,AT4G10340,AT4G20360,AT4G24770,AT4G35000,AT4G37930,AT5G01530	GO:0009526
plastid	4.10545e-08	35	AT1G03630,AT1G09340,AT1G15820,AT1G42970,AT1G78060,AT1G78900,AT2G01140,AT2G33150,AT2G34420,AT2G35410,AT2G37220,AT2G38040,AT2G40290,AT3G08940,AT3G09260,AT3G26060,AT3G53460,AT3G56940,AT3G63140,AT4G01130,AT4G10340,AT4G11010,AT4G20360,AT4G24770,AT4G34110,AT4G35000,AT4G35630,AT4G37930,AT5G01530,AT5G24490,AT5G25980,AT5G30510,AT5G61780,AT5G63810,AT5G67630	GO:0009536
chloroplast	1.80911e-07	32	AT1G03630,AT1G09340,AT1G15820,AT1G42970,AT1G78060,AT1G78900,AT2G01140,AT2G33150,AT2G34420,AT2G35410,AT2G37220,AT2G38040,AT2G40290,AT3G08940,AT3G09260,AT3G26060,AT3G53460,AT3G56940,AT3G63140,AT4G01130,AT4G10340,AT4G11010,AT4G20360,AT4G24770,AT4G34110,AT4G35000,AT4G35630,AT4G37930,AT5G01530,AT5G24490,AT5G25980,AT5G30510	GO:0009507
chloroplast thylakoid membrane	2.39195e-07	13	AT1G03630,AT1G15820,AT1G42970,AT2G34420,AT2G37220,AT3G08940,AT3G26060,AT3G53460,AT3G56940,AT4G10340,AT4G20360,AT4G24770,AT5G01530	GO:0009535
plastid thylakoid membrane	2.46455e-07	13	AT1G03630,AT1G15820,AT1G42970,AT2G34420,AT2G37220,AT3G08940,AT3G26060,AT3G53460,AT3G56940,AT4G10340,AT4G20360,AT4G24770,AT5G01530	GO:0055035
organelle envelope	3.46495e-07	21	AT1G03630,AT1G09340,AT1G15820,AT1G42970,AT1G78900,AT2G34420,AT2G37220,AT2G38040,AT3G08940,AT3G26060,AT3G53460,AT3G56940,AT3G63140,AT4G10340,AT4G11010,AT4G20360,AT4G24770,AT4G35000,AT4G37930,AT5G01530,AT5G61780	GO:0031967
envelope	3.46495e-07	21	AT1G03630,AT1G09340,AT1G15820,AT1G42970,AT1G78900,AT2G34420,AT2G37220,AT2G38040,AT3G08940,AT3G26060,AT3G53460,AT3G56940,AT3G63140,AT4G10340,AT4G11010,AT4G20360,AT4G24770,AT4G35000,AT4G37930,AT5G01530,AT5G61780	GO:0031975
thylakoid membrane	3.7544e-07	13	AT1G03630,AT1G15820,AT1G42970,AT2G34420,AT2G37220,AT3G08940,AT3G26060,AT3G53460,AT3G56940,AT4G10340,AT4G20360,AT4G24770,AT5G01530	GO:0042651
chloroplast stroma	3.75542e-07	19	AT1G09340,AT1G42970,AT2G01140,AT2G34420,AT2G35410,AT2G37220,AT2G38040,AT3G08940,AT3G26060,AT3G53460,AT3G63140,AT4G10340,AT4G20360,AT4G24770,AT4G35630,AT4G37930,AT5G01530,AT5G24490,AT5G30510	GO:0009570
photosynthetic membrane	3.97563e-07	13	AT1G03630,AT1G15820,AT1G42970,AT2G34420,AT2G37220,AT3G08940,AT3G26060,AT3G53460,AT3G56940,AT4G10340,AT4G20360,AT4G24770,AT5G01530	GO:0034357
plastid stroma	4.32274e-07	19	AT1G09340,AT1G42970,AT2G01140,AT2G34420,AT2G35410,AT2G37220,AT2G38040,AT3G08940,AT3G26060,AT3G53460,AT3G63140,AT4G10340,AT4G20360,AT4G24770,AT4G35630,AT4G37930,AT5G01530,AT5G24490,AT5G30510	GO:0009532
cell-cell junction	4.42526e-07	17	AT1G02335,AT1G09340,AT1G72150,AT1G78060,AT1G78900,AT2G36460,AT2G42910,AT3G02880,AT3G09260,AT3G13750,AT3G16420,AT3G62020,AT3G62120,AT4G35000,AT5G25980,AT5G60390,AT5G61780	GO:0005911
plasmodesma	4.42526e-07	17	AT1G02335,AT1G09340,AT1G72150,AT1G78060,AT1G78900,AT2G36460,AT2G42910,AT3G02880,AT3G09260,AT3G13750,AT3G16420,AT3G62020,AT3G62120,AT4G35000,AT5G25980,AT5G60390,AT5G61780	GO:0009506
cell junction	4.42526e-07	17	AT1G02335,AT1G09340,AT1G72150,AT1G78060,AT1G78900,AT2G36460,AT2G42910,AT3G02880,AT3G09260,AT3G13750,AT3G16420,AT3G62020,AT3G62120,AT4G35000,AT5G25980,AT5G60390,AT5G61780	GO:0030054
anchoring junction	4.42526e-07	17	AT1G02335,AT1G09340,AT1G72150,AT1G78060,AT1G78900,AT2G36460,AT2G42910,AT3G02880,AT3G09260,AT3G13750,AT3G16420,AT3G62020,AT3G62120,AT4G35000,AT5G25980,AT5G60390,AT5G61780	GO:0070161
symplast	4.48881e-07	17	AT1G02335,AT1G09340,AT1G72150,AT1G78060,AT1G78900,AT2G36460,AT2G42910,AT3G02880,AT3G09260,AT3G13750,AT3G16420,AT3G62020,AT3G62120,AT4G35000,AT5G25980,AT5G60390,AT5G61780	GO:0055044
apoplast	7.22204e-07	13	AT1G02335,AT1G09340,AT1G42970,AT1G55210,AT1G72150,AT1G78060,AT3G13750,AT3G62020,AT3G63140,AT4G20360,AT4G37930,AT5G25980,AT5G63810	GO:0048046
cytosol	9.02309e-07	40	AT1G04170,AT1G09340,AT1G11580,AT1G42970,AT1G48410,AT1G72150,AT1G78900,AT2G01140,AT2G19520,AT2G33150,AT2G36460,AT2G40290,AT2G42910,AT3G02880,AT3G08940,AT3G09260,AT3G12800,AT3G13750,AT3G16420,AT3G26060,AT3G26420,AT3G51800,AT3G53460,AT3G62120,AT3G63140,AT4G01130,AT4G10340,AT4G11010,AT4G20360,AT4G24770,AT4G25900,AT4G34110,AT4G35000,AT4G35630,AT4G37930,AT5G24490,AT5G25980,AT5G30510,AT5G60390,AT5G61780	GO:0005829
cytoplasm	1.65129e-06	53	AT1G03630,AT1G04170,AT1G09340,AT1G11580,AT1G15820,AT1G42970,AT1G48410,AT1G72150,AT1G78060,AT1G78900,AT2G01140,AT2G19520,AT2G33150,AT2G34420,AT2G35410,AT2G36460,AT2G37220,AT2G38040,AT2G40290,AT2G42910,AT3G02880,AT3G08940,AT3G09260,AT3G12800,AT3G13750,AT3G16420,AT3G26060,AT3G26420,AT3G47800,AT3G51800,AT3G53460,AT3G56940,AT3G62120,AT3G63140,AT4G01130,AT4G10340,AT4G11010,AT4G20360,AT4G24770,AT4G25900…	GO:0005737
plastoglobule	4.28803e-06	8	AT1G09340,AT2G01140,AT2G34420,AT3G08940,AT3G26060,AT3G63140,AT4G10340,AT5G01530	GO:0010287
chloroplast envelope	6.60218e-06	16	AT1G03630,AT1G09340,AT1G15820,AT1G42970,AT1G78900,AT2G34420,AT2G37220,AT2G38040,AT3G08940,AT3G26060,AT3G56940,AT3G63140,AT4G20360,AT4G24770,AT4G35000,AT5G01530	GO:0009941
plastid membrane	7.14746e-06	14	AT1G03630,AT1G15820,AT1G42970,AT2G34420,AT2G37220,AT2G38040,AT3G08940,AT3G26060,AT3G53460,AT3G56940,AT4G10340,AT4G20360,AT4G24770,AT5G01530	GO:0042170
stromule	6.69678e-05	5	AT1G09340,AT1G42970,AT2G37220,AT3G63140,AT4G37930	GO:0010319
photosystem I	0.000226474	5	AT1G15820,AT2G34420,AT3G08940,AT4G10340,AT5G01530	GO:0009522
organelle subcompartment	0.000550997	18	AT1G03630,AT1G15820,AT1G42970,AT2G01140,AT2G34420,AT2G37220,AT3G08940,AT3G26060,AT3G53460,AT3G56940,AT3G63140,AT4G10340,AT4G11010,AT4G20360,AT4G24770,AT4G37930,AT5G01530,AT5G24490	GO:0031984
extracellular region	0.0012397	21	AT1G02335,AT1G03630,AT1G04170,AT1G09340,AT1G11580,AT1G42970,AT1G55210,AT1G72150,AT1G78060,AT2G45220,AT3G02880,AT3G13750,AT3G62020,AT3G63140,AT4G01130,AT4G20360,AT4G25900,AT4G37930,AT5G23210,AT5G25980,AT5G63810	GO:0005576
photosystem II	0.00285498	5	AT1G15820,AT2G34420,AT3G08940,AT4G10340,AT5G01530	GO:0009523
photosystem	0.0126087	5	AT1G15820,AT2G34420,AT3G08940,AT4G10340,AT5G01530	GO:0009521
cell wall	0.016306	11	AT1G02335,AT1G11580,AT1G65590,AT1G78060,AT1G78900,AT2G45220,AT3G02880,AT3G13750,AT3G62020,AT4G25900,AT5G63810	GO:0005618
vacuole	0.0170887	13	AT1G09340,AT1G11580,AT1G72150,AT1G78900,AT2G33150,AT3G09260,AT3G12800,AT3G13750,AT4G35000,AT5G23210,AT5G25980,AT5G60390,AT5G63810	GO:0005773
external encapsulating structure	0.0203438	11	AT1G02335,AT1G11580,AT1G65590,AT1G78060,AT1G78900,AT2G45220,AT3G02880,AT3G13750,AT3G62020,AT4G25900,AT5G63810	GO:0030312
His6-MBP-Csy4* all positive
GO MF	p-value	number	AGIs	GO
mRNA binding	8.69764e-31	63	AT1G01080,AT1G09340,AT1G14410,AT1G15820,AT1G18080,AT1G30360,AT1G31330,AT1G42970,AT1G48410,AT1G48920,AT1G54780,AT1G67700,AT2G34420,AT2G35410,AT2G36460,AT2G37220,AT2G39730,AT2G40290,AT3G07810,AT3G08940,AT3G13470,AT3G14310,AT3G26060,AT3G26420,AT3G26650,AT3G47470,AT3G51800,AT3G52590,AT3G52930,AT3G53420,AT3G53460,AT3G56940,AT3G63140,AT4G02770,AT4G10340,AT4G20360,AT4G24770,AT4G25550,AT4G27440,AT4G29060…	GO:0003729
RNA binding	9.38067e-20	67	AT1G01080,AT1G04170,AT1G09340,AT1G14410,AT1G15820,AT1G18080,AT1G20960,AT1G30360,AT1G31330,AT1G32990,AT1G42970,AT1G48410,AT1G48920,AT1G54780,AT1G67700,AT2G34420,AT2G35410,AT2G36460,AT2G37220,AT2G39730,AT2G40290,AT3G07810,AT3G08940,AT3G13470,AT3G14310,AT3G26060,AT3G26420,AT3G26650,AT3G47470,AT3G51800,AT3G52590,AT3G52930,AT3G53420,AT3G53460,AT3G55220,AT3G56940,AT3G63140,AT4G02770,AT4G10340,AT4G20360…	GO:0003723
chlorophyll binding	2.47002e-11	11	AT1G15820,AT2G34420,AT3G08940,AT3G47470,AT4G10340,AT5G01530,ATCG00020,ATCG00270,ATCG00280,ATCG00340,ATCG00680	GO:0016168
fructose-bisphosphate aldolase activity	1.16001e-05	5	AT2G01140,AT2G21330,AT2G36460,AT3G52930,AT4G38970	GO:0004332
protein domain specific binding	1.55174e-05	9	AT1G31330,AT2G34420,AT3G26650,AT3G47470,AT4G02770,AT4G10340,AT4G27440,AT5G01530,AT5G38420	GO:0019904
nucleic acid binding	0.00199897	71	AT1G01080,AT1G04170,AT1G09340,AT1G14410,AT1G15820,AT1G18080,AT1G20960,AT1G30360,AT1G31330,AT1G32990,AT1G42970,AT1G48410,AT1G48920,AT1G54780,AT1G67700,AT2G34420,AT2G35410,AT2G36460,AT2G37220,AT2G39730,AT2G40290,AT3G04120,AT3G07810,AT3G08940,AT3G10690,AT3G13470,AT3G14310,AT3G26060,AT3G26420,AT3G26650,AT3G42170,AT3G47470,AT3G51800,AT3G52590,AT3G52930,AT3G53420,AT3G53460,AT3G55220,AT3G56940,AT3G63140…	GO:0003676
aldehyde-lyase activity	0.00490382	6	AT2G01140,AT2G21330,AT2G36460,AT3G52930,AT4G10750,AT4G38970	GO:0016832
electron transporter, transferring electrons within the cyclic electron transport pathway of photosynthesis activity	0.00730103	4	ATCG00020,ATCG00270,ATCG00280,ATCG00680	GO:0045156
poly(U) RNA binding	0.0118785	6	AT2G37220,AT3G53460,AT3G63140,AT4G24770,AT4G34110,AT4G37930	GO:0008266
poly-pyrimidine tract binding	0.0249628	6	AT2G37220,AT3G53460,AT3G63140,AT4G24770,AT4G34110,AT4G37930	GO:0008187
copper ion binding	0.029779	10	AT1G24360,AT1G31690,AT1G41830,AT2G36460,AT3G04120,AT3G09260,AT3G16420,AT3G16460,AT3G52930,AT5G21105	GO:0005507
GO BP	p-value	number	AGIs	GO
photosynthesis	5.7333e-12	23	AT1G03630,AT1G15820,AT1G31330,AT1G42970,AT1G54780,AT1G77510,AT2G34420,AT3G08940,AT3G26650,AT3G47470,AT3G56940,AT4G02770,AT4G04640,AT4G10340,AT4G27440,AT5G01530,AT5G38420,ATCG00020,ATCG00270,ATCG00280,ATCG00340,ATCG00490,ATCG00680	GO:0015979
protein-chromophore linkage	1.49948e-08	11	AT1G15820,AT2G34420,AT3G08940,AT3G47470,AT4G10340,AT5G01530,ATCG00020,ATCG00270,ATCG00280,ATCG00340,ATCG00680	GO:0018298
generation of precursor metabolites and energy	3.52266e-06	21	AT1G15820,AT1G54780,AT1G77510,AT2G01140,AT2G21330,AT2G34420,AT2G36460,AT3G04120,AT3G08940,AT3G47470,AT3G52930,AT4G04640,AT4G10340,AT4G38970,AT5G01530,ATCG00020,ATCG00270,ATCG00280,ATCG00340,ATCG00480,ATCG00680	GO:0006091
glucose metabolic process	5.00921e-06	9	AT1G42970,AT2G01140,AT2G21330,AT2G36460,AT3G04120,AT3G26650,AT3G47800,AT3G52930,AT4G38970	GO:0006006
photosynthesis, light reaction	6.66209e-06	14	AT1G15820,AT1G54780,AT1G77510,AT2G34420,AT3G08940,AT3G47470,AT4G04640,AT4G10340,AT5G01530,ATCG00020,ATCG00270,ATCG00280,ATCG00340,ATCG00680	GO:0019684
response to cadmium ion	8.28715e-06	17	AT1G04510,AT1G18080,AT1G42970,AT1G68560,AT1G77510,AT2G01140,AT2G21330,AT2G36460,AT2G47470,AT3G04120,AT3G52930,AT4G29060,AT4G37930,AT4G38970,AT5G07350,AT5G61780,ATCG00490	GO:0046686
photosynthetic electron transport in photosystem II	5.62814e-05	5	AT4G04640,ATCG00020,ATCG00270,ATCG00280,ATCG00680	GO:0009772
carbohydrate metabolic process	0.000197305	33	AT1G09340,AT1G11580,AT1G42970,AT1G52400,AT1G65590,AT1G68560,AT1G78060,AT2G01140,AT2G06850,AT2G21330,AT2G22230,AT2G36460,AT2G45220,AT3G04120,AT3G09260,AT3G12700,AT3G13750,AT3G13790,AT3G14310,AT3G18080,AT3G26650,AT3G47800,AT3G52930,AT4G24780,AT4G25900,AT4G33220,AT4G38970,AT5G25980,AT5G38420,AT5G63800,AT5G63810,AT5G66680,ATCG00490	GO:0005975
fructose 1,6-bisphosphate metabolic process	0.000203092	5	AT2G01140,AT2G21330,AT2G36460,AT3G52930,AT4G38970	GO:0030388
response to cold	0.000216814	18	AT1G09340,AT1G42970,AT2G37220,AT2G39730,AT3G09260,AT3G16460,AT3G16470,AT3G26420,AT3G26650,AT3G47470,AT3G53460,AT4G21150,AT4G24770,AT4G35090,AT4G37930,AT5G20630,ATCG00120,ATCG00480	GO:0009409
response to metal ion	0.000216814	18	AT1G04510,AT1G18080,AT1G42970,AT1G68560,AT1G77510,AT2G01140,AT2G21330,AT2G36460,AT2G47470,AT3G04120,AT3G52930,AT4G29060,AT4G37930,AT4G38970,AT5G07350,AT5G23060,AT5G61780,ATCG00490	GO:0010038
purine nucleotide metabolic process	0.000228346	13	AT2G01140,AT2G21330,AT2G36460,AT2G38040,AT2G42910,AT3G04120,AT3G52930,AT4G04640,AT4G11010,AT4G38970,ATCG00120,ATCG00480,ATCG00500	GO:0006163
photosynthesis, light harvesting	0.000323153	9	AT1G15820,AT1G54780,AT2G34420,AT3G08940,AT3G47470,AT4G10340,AT5G01530,ATCG00270,ATCG00340	GO:0009765
response to temperature stimulus	0.000345001	23	AT1G09340,AT1G16030,AT1G42970,AT2G37220,AT2G39730,AT3G04120,AT3G09260,AT3G16460,AT3G16470,AT3G26420,AT3G26650,AT3G47470,AT3G53460,AT4G21150,AT4G24770,AT4G35090,AT4G37930,AT5G07350,AT5G20630,AT5G28540,AT5G61780,ATCG00120,ATCG00480	GO:0009266
carbohydrate catabolic process	0.000427888	15	AT1G09340,AT1G11580,AT1G68560,AT1G78060,AT2G01140,AT2G21330,AT2G36460,AT2G45220,AT3G04120,AT3G14310,AT3G47800,AT3G52930,AT4G24780,AT4G33220,AT4G38970	GO:0016052
gluconeogenesis	0.000655089	6	AT2G01140,AT2G21330,AT2G36460,AT3G04120,AT3G52930,AT4G38970	GO:0006094
purine-containing compound metabolic process	0.000782169	13	AT2G01140,AT2G21330,AT2G36460,AT2G38040,AT2G42910,AT3G04120,AT3G52930,AT4G04640,AT4G11010,AT4G38970,ATCG00120,ATCG00480,ATCG00500	GO:0072521
hexose biosynthetic process	0.00107723	6	AT2G01140,AT2G21330,AT2G36460,AT3G04120,AT3G52930,AT4G38970	GO:0019319
ribose phosphate metabolic process	0.00114201	13	AT2G01140,AT2G21330,AT2G36460,AT2G38040,AT2G42910,AT3G04120,AT3G52930,AT4G04640,AT4G11010,AT4G38970,ATCG00120,ATCG00480,ATCG00500	GO:0019693
purine ribonucleotide metabolic process	0.0012348	12	AT2G01140,AT2G21330,AT2G36460,AT2G38040,AT3G04120,AT3G52930,AT4G04640,AT4G11010,AT4G38970,ATCG00120,ATCG00480,ATCG00500	GO:0009150
ribonucleotide metabolic process	0.00513943	12	AT2G01140,AT2G21330,AT2G36460,AT2G38040,AT3G04120,AT3G52930,AT4G04640,AT4G11010,AT4G38970,ATCG00120,ATCG00480,ATCG00500	GO:0009259
response to inorganic substance	0.00692024	25	AT1G04510,AT1G09340,AT1G18080,AT1G42970,AT1G52400,AT1G68560,AT1G77510,AT2G01140,AT2G18960,AT2G21330,AT2G36460,AT2G47470,AT3G04120,AT3G52930,AT3G53420,AT4G00430,AT4G29060,AT4G35090,AT4G37930,AT4G38970,AT5G07350,AT5G23060,AT5G59970,AT5G61780,ATCG00490	GO:0010035
response to chemical	0.00735114	52	AT1G04510,AT1G09340,AT1G16030,AT1G18080,AT1G28290,AT1G33600,AT1G42970,AT1G48410,AT1G52400,AT1G68560,AT1G77510,AT2G01140,AT2G06850,AT2G18960,AT2G21330,AT2G33150,AT2G34810,AT2G36460,AT2G37220,AT2G39730,AT2G47470,AT3G02880,AT3G04120,AT3G12700,AT3G15356,AT3G16470,AT3G16530,AT3G26060,AT3G26650,AT3G51800,AT3G52930,AT3G53420,AT4G00430,AT4G27440,AT4G29060,AT4G30610,AT4G35000,AT4G35090,AT4G35100,AT4G37930…	GO:0042221
nucleotide metabolic process	0.00845984	13	AT2G01140,AT2G21330,AT2G36460,AT2G38040,AT2G42910,AT3G04120,AT3G52930,AT4G04640,AT4G11010,AT4G38970,ATCG00120,ATCG00480,ATCG00500	GO:0009117
photosynthesis, light harvesting in photosystem I	0.0105937	7	AT1G15820,AT2G34420,AT3G08940,AT3G47470,AT4G10340,AT5G01530,ATCG00340	GO:0009768
nucleoside phosphate metabolic process	0.0128644	13	AT2G01140,AT2G21330,AT2G36460,AT2G38040,AT2G42910,AT3G04120,AT3G52930,AT4G04640,AT4G11010,AT4G38970,ATCG00120,ATCG00480,ATCG00500	GO:0006753
response to abiotic stimulus	0.0129055	44	AT1G09340,AT1G15820,AT1G16030,AT1G42970,AT1G48410,AT1G52400,AT1G77510,AT2G06850,AT2G18960,AT2G19520,AT2G34420,AT2G36460,AT2G37220,AT2G39730,AT3G04120,AT3G08940,AT3G09260,AT3G13790,AT3G16460,AT3G16470,AT3G26420,AT3G26650,AT3G47470,AT3G52930,AT3G53420,AT3G53460,AT4G00430,AT4G10340,AT4G21150,AT4G24770,AT4G35090,AT4G37930,AT5G01530,AT5G07350,AT5G20630,AT5G23060,AT5G28540,AT5G40490,AT5G59970,AT5G61780…	GO:0009628
ribonucleoprotein complex biogenesis	0.0267243	16	AT1G01080,AT1G04170,AT1G04510,AT1G09340,AT1G18080,AT1G20960,AT1G48920,AT2G33340,AT2G37220,AT3G51800,AT3G53460,AT3G63140,AT4G24770,AT4G25550,AT4G32720,AT5G67630	GO:0022613
organonitrogen compound metabolic process	0.039117	67	AT1G03630,AT1G04170,AT1G04510,AT1G09340,AT1G11580,AT1G15820,AT1G18080,AT1G31690,AT1G32990,AT1G48410,AT1G48920,AT1G52400,AT1G54780,AT1G65590,AT1G74000,AT2G01140,AT2G19520,AT2G21330,AT2G24280,AT2G33340,AT2G34420,AT2G36460,AT2G38040,AT2G42910,AT3G02880,AT3G04120,AT3G04600,AT3G08940,AT3G09260,AT3G12290,AT3G47470,AT3G52590,AT3G52930,AT3G56940,AT3G62120,AT3G63140,AT4G04640,AT4G10340,AT4G11010,AT4G20360…	GO:1901564
hexose metabolic process	0.0422626	9	AT1G42970,AT2G01140,AT2G21330,AT2G36460,AT3G04120,AT3G26650,AT3G47800,AT3G52930,AT4G38970	GO:0019318
GO CC	p-value	number	AGIs	GO
thylakoid	1.05497e-27	47	AT1G01080,AT1G03630,AT1G15820,AT1G31330,AT1G42970,AT1G54780,AT1G67700,AT2G01140,AT2G21330,AT2G22230,AT2G34420,AT2G35410,AT2G37220,AT2G39730,AT3G08940,AT3G26060,AT3G26650,AT3G46780,AT3G47470,AT3G53460,AT3G56940,AT3G63140,AT4G02770,AT4G04640,AT4G10340,AT4G11010,AT4G20360,AT4G24770,AT4G27440,AT4G37930,AT4G38970,AT5G01530,AT5G17170,AT5G23060,AT5G24490,AT5G30510,AT5G38420,AT5G50920,AT5G59970,ATCG00020…	GO:0009579
plastid	1.36771e-27	102	AT1G01080,AT1G02280,AT1G03630,AT1G06950,AT1G09340,AT1G14410,AT1G15820,AT1G16030,AT1G18080,AT1G24360,AT1G30360,AT1G31330,AT1G31690,AT1G32990,AT1G42970,AT1G49750,AT1G52400,AT1G54780,AT1G67700,AT1G74000,AT1G77510,AT1G78060,AT1G78900,AT2G01140,AT2G21330,AT2G22230,AT2G24280,AT2G33150,AT2G34420,AT2G35410,AT2G37220,AT2G38040,AT2G39730,AT2G40290,AT2G47470,AT3G04120,AT3G08940,AT3G09260,AT3G10690,AT3G12290…	GO:0009536
cell wall	1.89635e-26	54	AT1G02335,AT1G11580,AT1G16030,AT1G28290,AT1G33590,AT1G33600,AT1G41830,AT1G65590,AT1G65870,AT1G68560,AT1G72610,AT1G74000,AT1G78060,AT1G78900,AT2G05920,AT2G06850,AT2G22230,AT2G33340,AT2G33530,AT2G34810,AT2G39730,AT2G45220,AT2G47470,AT3G02880,AT3G13750,AT3G13790,AT3G14310,AT3G15356,AT3G16530,AT3G18080,AT3G20820,AT3G52500,AT3G52930,AT3G62020,AT4G13340,AT4G19410,AT4G21150,AT4G25900,AT4G32720,AT4G33220…	GO:0005618
plastid envelope	1.95831e-26	55	AT1G01080,AT1G02280,AT1G03630,AT1G06950,AT1G09340,AT1G15820,AT1G24360,AT1G30360,AT1G31330,AT1G32990,AT1G42970,AT1G54780,AT1G67700,AT1G78900,AT2G21330,AT2G34420,AT2G37220,AT2G38040,AT2G39730,AT3G08940,AT3G13470,AT3G26060,AT3G26650,AT3G46740,AT3G46780,AT3G47470,AT3G53460,AT3G56940,AT3G63140,AT4G02770,AT4G04640,AT4G10340,AT4G20360,AT4G24770,AT4G27440,AT4G29060,AT4G33350,AT4G35000,AT4G35090,AT4G37930…	GO:0009526
external encapsulating structure	5.71048e-26	54	AT1G02335,AT1G11580,AT1G16030,AT1G28290,AT1G33590,AT1G33600,AT1G41830,AT1G65590,AT1G65870,AT1G68560,AT1G72610,AT1G74000,AT1G78060,AT1G78900,AT2G05920,AT2G06850,AT2G22230,AT2G33340,AT2G33530,AT2G34810,AT2G39730,AT2G45220,AT2G47470,AT3G02880,AT3G13750,AT3G13790,AT3G14310,AT3G15356,AT3G16530,AT3G18080,AT3G20820,AT3G52500,AT3G52930,AT3G62020,AT4G13340,AT4G19410,AT4G21150,AT4G25900,AT4G32720,AT4G33220…	GO:0030312
chloroplast thylakoid	1.45472e-24	42	AT1G01080,AT1G03630,AT1G15820,AT1G31330,AT1G42970,AT1G54780,AT1G67700,AT2G01140,AT2G21330,AT2G22230,AT2G34420,AT2G37220,AT2G39730,AT3G08940,AT3G26060,AT3G26650,AT3G46780,AT3G47470,AT3G53460,AT3G56940,AT3G63140,AT4G02770,AT4G04640,AT4G10340,AT4G11010,AT4G20360,AT4G24770,AT4G27440,AT4G37930,AT5G01530,AT5G17170,AT5G23060,AT5G24490,AT5G50920,ATCG00020,ATCG00120,ATCG00270,ATCG00280,ATCG00340,ATCG00480…	GO:0009534
plastid thylakoid	1.57385e-24	42	AT1G01080,AT1G03630,AT1G15820,AT1G31330,AT1G42970,AT1G54780,AT1G67700,AT2G01140,AT2G21330,AT2G22230,AT2G34420,AT2G37220,AT2G39730,AT3G08940,AT3G26060,AT3G26650,AT3G46780,AT3G47470,AT3G53460,AT3G56940,AT3G63140,AT4G02770,AT4G04640,AT4G10340,AT4G11010,AT4G20360,AT4G24770,AT4G27440,AT4G37930,AT5G01530,AT5G17170,AT5G23060,AT5G24490,AT5G50920,ATCG00020,ATCG00120,ATCG00270,ATCG00280,ATCG00340,ATCG00480…	GO:0031976
chloroplast	1.09864e-23	90	AT1G01080,AT1G02280,AT1G03630,AT1G06950,AT1G09340,AT1G14410,AT1G15820,AT1G16030,AT1G18080,AT1G24360,AT1G30360,AT1G31330,AT1G31690,AT1G32990,AT1G42970,AT1G49750,AT1G52400,AT1G54780,AT1G67700,AT1G74000,AT1G77510,AT1G78060,AT1G78900,AT2G01140,AT2G21330,AT2G22230,AT2G24280,AT2G33150,AT2G34420,AT2G35410,AT2G37220,AT2G38040,AT2G39730,AT2G40290,AT2G47470,AT3G04120,AT3G08940,AT3G09260,AT3G10690,AT3G12290…	GO:0009507
plastoglobule	6.31052e-23	22	AT1G09340,AT1G31330,AT2G01140,AT2G21330,AT2G34420,AT2G39730,AT3G08940,AT3G26060,AT3G47470,AT3G63140,AT4G02770,AT4G10340,AT4G38970,AT5G01530,ATCG00020,ATCG00120,ATCG00270,ATCG00280,ATCG00340,ATCG00480,ATCG00490,ATCG00680	GO:0010287
organelle envelope	3.89508e-22	60	AT1G01080,AT1G02280,AT1G03630,AT1G06950,AT1G09340,AT1G15820,AT1G24360,AT1G30360,AT1G31330,AT1G32990,AT1G42970,AT1G54780,AT1G67700,AT1G78900,AT2G21330,AT2G34420,AT2G37220,AT2G38040,AT2G39730,AT3G04120,AT3G08940,AT3G13470,AT3G26060,AT3G26650,AT3G46740,AT3G46780,AT3G47470,AT3G52930,AT3G53460,AT3G56940,AT3G63140,AT4G02770,AT4G04640,AT4G10340,AT4G11010,AT4G20360,AT4G24770,AT4G27440,AT4G29060,AT4G33350…	GO:0031967
envelope	3.89508e-22	60	AT1G01080,AT1G02280,AT1G03630,AT1G06950,AT1G09340,AT1G15820,AT1G24360,AT1G30360,AT1G31330,AT1G32990,AT1G42970,AT1G54780,AT1G67700,AT1G78900,AT2G21330,AT2G34420,AT2G37220,AT2G38040,AT2G39730,AT3G04120,AT3G08940,AT3G13470,AT3G26060,AT3G26650,AT3G46740,AT3G46780,AT3G47470,AT3G52930,AT3G53460,AT3G56940,AT3G63140,AT4G02770,AT4G04640,AT4G10340,AT4G11010,AT4G20360,AT4G24770,AT4G27440,AT4G29060,AT4G33350…	GO:0031975
chloroplast stroma	4.3206e-21	46	AT1G01080,AT1G09340,AT1G14410,AT1G24360,AT1G31330,AT1G32990,AT1G42970,AT1G77510,AT2G01140,AT2G21330,AT2G34420,AT2G35410,AT2G37220,AT2G38040,AT2G39730,AT3G08940,AT3G10690,AT3G13470,AT3G26060,AT3G26650,AT3G46780,AT3G47470,AT3G53460,AT3G63140,AT4G02770,AT4G10340,AT4G20360,AT4G24770,AT4G29060,AT4G35630,AT4G37930,AT4G38970,AT5G01530,AT5G24490,AT5G30510,AT5G38420,AT5G50920,ATCG00020,ATCG00120,ATCG00270…	GO:0009570
plastid stroma	6.35543e-21	46	AT1G01080,AT1G09340,AT1G14410,AT1G24360,AT1G31330,AT1G32990,AT1G42970,AT1G77510,AT2G01140,AT2G21330,AT2G34420,AT2G35410,AT2G37220,AT2G38040,AT2G39730,AT3G08940,AT3G10690,AT3G13470,AT3G26060,AT3G26650,AT3G46780,AT3G47470,AT3G53460,AT3G63140,AT4G02770,AT4G10340,AT4G20360,AT4G24770,AT4G29060,AT4G35630,AT4G37930,AT4G38970,AT5G01530,AT5G24490,AT5G30510,AT5G38420,AT5G50920,ATCG00020,ATCG00120,ATCG00270…	GO:0009532
chloroplast thylakoid membrane	7.45e-21	35	AT1G01080,AT1G03630,AT1G15820,AT1G31330,AT1G42970,AT1G54780,AT1G67700,AT2G34420,AT2G37220,AT2G39730,AT3G08940,AT3G26060,AT3G26650,AT3G46780,AT3G47470,AT3G53460,AT3G56940,AT4G02770,AT4G04640,AT4G10340,AT4G20360,AT4G24770,AT4G27440,AT5G01530,AT5G17170,AT5G23060,AT5G50920,ATCG00020,ATCG00120,ATCG00270,ATCG00280,ATCG00340,ATCG00480,ATCG00490,ATCG00680	GO:0009535
plastid thylakoid membrane	8.08085e-21	35	AT1G01080,AT1G03630,AT1G15820,AT1G31330,AT1G42970,AT1G54780,AT1G67700,AT2G34420,AT2G37220,AT2G39730,AT3G08940,AT3G26060,AT3G26650,AT3G46780,AT3G47470,AT3G53460,AT3G56940,AT4G02770,AT4G04640,AT4G10340,AT4G20360,AT4G24770,AT4G27440,AT5G01530,AT5G17170,AT5G23060,AT5G50920,ATCG00020,ATCG00120,ATCG00270,ATCG00280,ATCG00340,ATCG00480,ATCG00490,ATCG00680	GO:0055035
apoplast	1.2058e-20	36	AT1G02335,AT1G09340,AT1G41830,AT1G42970,AT1G55210,AT1G68560,AT1G72150,AT1G72610,AT1G78060,AT2G06850,AT2G21330,AT2G39730,AT3G04120,AT3G13750,AT3G13790,AT3G14310,AT3G15356,AT3G16530,AT3G20820,AT3G26650,AT3G52930,AT3G62020,AT3G63140,AT4G20360,AT4G37930,AT4G38970,AT4G39640,AT5G03350,AT5G09440,AT5G20630,AT5G25980,AT5G38420,AT5G63800,AT5G63810,AT5G64260,ATCG00490	GO:0048046
thylakoid membrane	2.49167e-20	35	AT1G01080,AT1G03630,AT1G15820,AT1G31330,AT1G42970,AT1G54780,AT1G67700,AT2G34420,AT2G37220,AT2G39730,AT3G08940,AT3G26060,AT3G26650,AT3G46780,AT3G47470,AT3G53460,AT3G56940,AT4G02770,AT4G04640,AT4G10340,AT4G20360,AT4G24770,AT4G27440,AT5G01530,AT5G17170,AT5G23060,AT5G50920,ATCG00020,ATCG00120,ATCG00270,ATCG00280,ATCG00340,ATCG00480,ATCG00490,ATCG00680	GO:0042651
photosynthetic membrane	2.91401e-20	35	AT1G01080,AT1G03630,AT1G15820,AT1G31330,AT1G42970,AT1G54780,AT1G67700,AT2G34420,AT2G37220,AT2G39730,AT3G08940,AT3G26060,AT3G26650,AT3G46780,AT3G47470,AT3G53460,AT3G56940,AT4G02770,AT4G04640,AT4G10340,AT4G20360,AT4G24770,AT4G27440,AT5G01530,AT5G17170,AT5G23060,AT5G50920,ATCG00020,ATCG00120,ATCG00270,ATCG00280,ATCG00340,ATCG00480,ATCG00490,ATCG00680	GO:0034357
chloroplast envelope	3.39716e-19	43	AT1G01080,AT1G02280,AT1G03630,AT1G06950,AT1G09340,AT1G15820,AT1G24360,AT1G30360,AT1G31330,AT1G32990,AT1G42970,AT1G67700,AT1G78900,AT2G21330,AT2G34420,AT2G37220,AT2G38040,AT2G39730,AT3G08940,AT3G13470,AT3G26060,AT3G26650,AT3G46740,AT3G46780,AT3G47470,AT3G56940,AT3G63140,AT4G02770,AT4G04640,AT4G20360,AT4G24770,AT4G27440,AT4G29060,AT4G33350,AT4G35000,AT4G38970,AT5G01530,AT5G17170,AT5G38420,AT5G50920…	GO:0009941
extracellular region	2.02156e-18	74	AT1G02280,AT1G02335,AT1G03630,AT1G04170,AT1G04510,AT1G06950,AT1G09340,AT1G11580,AT1G14410,AT1G28290,AT1G30360,AT1G33811,AT1G41830,AT1G42970,AT1G52400,AT1G55210,AT1G65870,AT1G68560,AT1G72150,AT1G72610,AT1G78060,AT2G03980,AT2G05920,AT2G06850,AT2G21330,AT2G24280,AT2G33530,AT2G34810,AT2G39730,AT2G45220,AT2G47470,AT3G02110,AT3G02880,AT3G04120,AT3G12700,AT3G13750,AT3G13790,AT3G14310,AT3G15356,AT3G16530…	GO:0005576
plastid membrane	3.92585e-18	39	AT1G01080,AT1G02280,AT1G03630,AT1G06950,AT1G15820,AT1G31330,AT1G42970,AT1G54780,AT1G67700,AT2G34420,AT2G37220,AT2G38040,AT2G39730,AT3G08940,AT3G26060,AT3G26650,AT3G46740,AT3G46780,AT3G47470,AT3G53460,AT3G56940,AT4G02770,AT4G04640,AT4G10340,AT4G20360,AT4G24770,AT4G27440,AT5G01530,AT5G17170,AT5G23060,AT5G50920,ATCG00020,ATCG00120,ATCG00270,ATCG00280,ATCG00340,ATCG00480,ATCG00490,ATCG00680	GO:0042170
cell-cell junction	1.84627e-17	46	AT1G02335,AT1G09340,AT1G28290,AT1G30360,AT1G41830,AT1G52400,AT1G68560,AT1G72150,AT1G78060,AT1G78900,AT2G05920,AT2G06850,AT2G18960,AT2G33530,AT2G36460,AT2G42910,AT3G02880,AT3G09260,AT3G13750,AT3G16420,AT3G16460,AT3G16470,AT3G20820,AT3G52930,AT3G53420,AT3G55220,AT3G62020,AT3G62120,AT4G00430,AT4G13340,AT4G19410,AT4G21150,AT4G35000,AT4G35100,AT4G39640,AT5G09440,AT5G21105,AT5G25460,AT5G25980,AT5G28540…	GO:0005911
plasmodesma	1.84627e-17	46	AT1G02335,AT1G09340,AT1G28290,AT1G30360,AT1G41830,AT1G52400,AT1G68560,AT1G72150,AT1G78060,AT1G78900,AT2G05920,AT2G06850,AT2G18960,AT2G33530,AT2G36460,AT2G42910,AT3G02880,AT3G09260,AT3G13750,AT3G16420,AT3G16460,AT3G16470,AT3G20820,AT3G52930,AT3G53420,AT3G55220,AT3G62020,AT3G62120,AT4G00430,AT4G13340,AT4G19410,AT4G21150,AT4G35000,AT4G35100,AT4G39640,AT5G09440,AT5G21105,AT5G25460,AT5G25980,AT5G28540…	GO:0009506
cell junction	1.84627e-17	46	AT1G02335,AT1G09340,AT1G28290,AT1G30360,AT1G41830,AT1G52400,AT1G68560,AT1G72150,AT1G78060,AT1G78900,AT2G05920,AT2G06850,AT2G18960,AT2G33530,AT2G36460,AT2G42910,AT3G02880,AT3G09260,AT3G13750,AT3G16420,AT3G16460,AT3G16470,AT3G20820,AT3G52930,AT3G53420,AT3G55220,AT3G62020,AT3G62120,AT4G00430,AT4G13340,AT4G19410,AT4G21150,AT4G35000,AT4G35100,AT4G39640,AT5G09440,AT5G21105,AT5G25460,AT5G25980,AT5G28540…	GO:0030054
anchoring junction	1.84627e-17	46	AT1G02335,AT1G09340,AT1G28290,AT1G30360,AT1G41830,AT1G52400,AT1G68560,AT1G72150,AT1G78060,AT1G78900,AT2G05920,AT2G06850,AT2G18960,AT2G33530,AT2G36460,AT2G42910,AT3G02880,AT3G09260,AT3G13750,AT3G16420,AT3G16460,AT3G16470,AT3G20820,AT3G52930,AT3G53420,AT3G55220,AT3G62020,AT3G62120,AT4G00430,AT4G13340,AT4G19410,AT4G21150,AT4G35000,AT4G35100,AT4G39640,AT5G09440,AT5G21105,AT5G25460,AT5G25980,AT5G28540…	GO:0070161
symplast	1.92273e-17	46	AT1G02335,AT1G09340,AT1G28290,AT1G30360,AT1G41830,AT1G52400,AT1G68560,AT1G72150,AT1G78060,AT1G78900,AT2G05920,AT2G06850,AT2G18960,AT2G33530,AT2G36460,AT2G42910,AT3G02880,AT3G09260,AT3G13750,AT3G16420,AT3G16460,AT3G16470,AT3G20820,AT3G52930,AT3G53420,AT3G55220,AT3G62020,AT3G62120,AT4G00430,AT4G13340,AT4G19410,AT4G21150,AT4G35000,AT4G35100,AT4G39640,AT5G09440,AT5G21105,AT5G25460,AT5G25980,AT5G28540…	GO:0055044
cytoplasm	6.9398e-16	154	AT1G01080,AT1G02280,AT1G03630,AT1G04170,AT1G04510,AT1G06950,AT1G09340,AT1G11580,AT1G14410,AT1G15820,AT1G16030,AT1G18080,AT1G20960,AT1G24360,AT1G30360,AT1G31330,AT1G31690,AT1G32990,AT1G33590,AT1G41830,AT1G42970,AT1G48410,AT1G48920,AT1G49750,AT1G52400,AT1G54780,AT1G67700,AT1G68560,AT1G72150,AT1G72610,AT1G74000,AT1G77510,AT1G78060,AT1G78900,AT2G01140,AT2G05920,AT2G06850,AT2G18960,AT2G19520,AT2G21330…	GO:0005737
cytosol	7.29268e-14	91	AT1G04170,AT1G09340,AT1G11580,AT1G16030,AT1G18080,AT1G20960,AT1G32990,AT1G33590,AT1G42970,AT1G48410,AT1G48920,AT1G68560,AT1G72150,AT1G78900,AT2G01140,AT2G05920,AT2G19520,AT2G21330,AT2G33150,AT2G36460,AT2G40290,AT2G42910,AT2G47470,AT3G02880,AT3G04120,AT3G04600,AT3G08940,AT3G09260,AT3G12290,AT3G12800,AT3G13470,AT3G13750,AT3G14310,AT3G15356,AT3G16420,AT3G16460,AT3G16470,AT3G16530,AT3G18080,AT3G20820…	GO:0005829
stromule	2.5885e-10	10	AT1G09340,AT1G42970,AT2G37220,AT2G39730,AT3G26650,AT3G63140,AT4G35090,AT4G37930,ATCG00120,ATCG00480	GO:0010319
organelle subcompartment	5.21407e-10	44	AT1G01080,AT1G03630,AT1G15820,AT1G31330,AT1G42970,AT1G54780,AT1G67700,AT2G01140,AT2G21330,AT2G22230,AT2G34420,AT2G37220,AT2G39730,AT3G08940,AT3G26060,AT3G26650,AT3G46780,AT3G47470,AT3G53460,AT3G56940,AT3G63140,AT4G02770,AT4G04640,AT4G10340,AT4G11010,AT4G20360,AT4G21150,AT4G24770,AT4G27440,AT4G37930,AT5G01530,AT5G17170,AT5G23060,AT5G24490,AT5G50920,AT5G66680,ATCG00020,ATCG00120,ATCG00270,ATCG00280…	GO:0031984
photosystem	2.91952e-09	13	AT1G15820,AT1G31330,AT2G34420,AT3G08940,AT3G47470,AT4G02770,AT4G10340,AT5G01530,ATCG00020,ATCG00270,ATCG00280,ATCG00340,ATCG00680	GO:0009521
vacuole	7.85025e-09	36	AT1G09340,AT1G11580,AT1G30360,AT1G52400,AT1G72150,AT1G74000,AT1G77510,AT1G78900,AT2G18960,AT2G22230,AT2G24280,AT2G33150,AT2G33530,AT2G47470,AT3G02110,AT3G04120,AT3G09260,AT3G12800,AT3G13750,AT3G16470,AT3G46740,AT3G52930,AT3G53420,AT4G00430,AT4G21150,AT4G35000,AT4G35100,AT5G23210,AT5G25980,AT5G28540,AT5G44020,AT5G59970,AT5G60390,AT5G63800,AT5G63810,AT5G66680	GO:0005773
plant-type cell wall	9.3917e-09	32	AT1G16030,AT1G28290,AT1G33590,AT1G68560,AT1G74000,AT1G78060,AT1G78900,AT2G06850,AT2G22230,AT2G33340,AT2G33530,AT2G39730,AT2G47470,AT3G02880,AT3G13750,AT3G18080,AT3G52500,AT3G52930,AT3G62020,AT4G13340,AT4G19410,AT4G21150,AT4G32720,AT5G07350,AT5G11420,AT5G25460,AT5G28540,AT5G50920,AT5G64260,AT5G66680,ATCG00480,ATCG00490	GO:0009505
cell periphery	3.45043e-08	78	AT1G02335,AT1G11580,AT1G16030,AT1G18080,AT1G28290,AT1G30360,AT1G33590,AT1G33600,AT1G41830,AT1G65590,AT1G65870,AT1G68560,AT1G72150,AT1G72610,AT1G74000,AT1G77510,AT1G78060,AT1G78900,AT2G05920,AT2G06850,AT2G18960,AT2G22230,AT2G33340,AT2G33530,AT2G34810,AT2G36460,AT2G39730,AT2G42910,AT2G45220,AT2G47470,AT3G02880,AT3G04120,AT3G13750,AT3G13790,AT3G14310,AT3G15356,AT3G16530,AT3G18080,AT3G20820,AT3G51800…	GO:0071944
photosystem I	1.21603e-07	9	AT1G15820,AT1G31330,AT2G34420,AT3G08940,AT3G47470,AT4G02770,AT4G10340,AT5G01530,ATCG00340	GO:0009522
organelle membrane	3.42261e-06	54	AT1G01080,AT1G02280,AT1G03630,AT1G06950,AT1G11580,AT1G15820,AT1G30360,AT1G31330,AT1G42970,AT1G54780,AT1G67700,AT1G77510,AT1G78900,AT2G33150,AT2G34420,AT2G37220,AT2G38040,AT2G39730,AT2G47470,AT3G04120,AT3G08940,AT3G12800,AT3G26060,AT3G26650,AT3G46740,AT3G46780,AT3G47470,AT3G52930,AT3G53460,AT3G56940,AT4G02770,AT4G04640,AT4G10340,AT4G11010,AT4G20360,AT4G21150,AT4G24770,AT4G27440,AT4G35000,AT5G01530…	GO:0031090
membrane protein complex	6.6159e-06	22	AT1G06950,AT1G15820,AT1G31330,AT1G78900,AT2G34420,AT3G08940,AT3G46740,AT3G47470,AT4G02770,AT4G04640,AT4G10340,AT4G21150,AT5G01530,AT5G50920,AT5G66680,ATCG00020,ATCG00120,ATCG00270,ATCG00280,ATCG00340,ATCG00480,ATCG00680	GO:0098796
photosystem II	1.29368e-05	9	AT1G15820,AT2G34420,AT3G08940,AT4G10340,AT5G01530,ATCG00020,ATCG00270,ATCG00280,ATCG00680	GO:0009523
intracellular anatomical structure	0.000126622	156	AT1G01080,AT1G02280,AT1G03630,AT1G04170,AT1G04510,AT1G06950,AT1G09340,AT1G11580,AT1G14410,AT1G15820,AT1G16030,AT1G18080,AT1G20960,AT1G24360,AT1G30360,AT1G31330,AT1G31690,AT1G32990,AT1G33590,AT1G33600,AT1G41830,AT1G42970,AT1G48410,AT1G48920,AT1G49750,AT1G52400,AT1G54780,AT1G65590,AT1G67700,AT1G68560,AT1G72150,AT1G72610,AT1G74000,AT1G77510,AT1G78060,AT1G78900,AT2G01140,AT2G05920,AT2G06850,AT2G18960…	GO:0005622
intracellular membrane-bounded organelle	0.000214326	143	AT1G01080,AT1G02280,AT1G03630,AT1G04510,AT1G06950,AT1G09340,AT1G11580,AT1G14410,AT1G15820,AT1G16030,AT1G18080,AT1G20960,AT1G24360,AT1G30360,AT1G31330,AT1G31690,AT1G32990,AT1G33590,AT1G33600,AT1G41830,AT1G42970,AT1G48410,AT1G48920,AT1G49750,AT1G52400,AT1G54780,AT1G65590,AT1G67700,AT1G68560,AT1G72150,AT1G72610,AT1G74000,AT1G77510,AT1G78060,AT1G78900,AT2G01140,AT2G05920,AT2G06850,AT2G18960,AT2G19520…	GO:0043231
membrane-bounded organelle	0.000370388	143	AT1G01080,AT1G02280,AT1G03630,AT1G04510,AT1G06950,AT1G09340,AT1G11580,AT1G14410,AT1G15820,AT1G16030,AT1G18080,AT1G20960,AT1G24360,AT1G30360,AT1G31330,AT1G31690,AT1G32990,AT1G33590,AT1G33600,AT1G41830,AT1G42970,AT1G48410,AT1G48920,AT1G49750,AT1G52400,AT1G54780,AT1G65590,AT1G67700,AT1G68560,AT1G72150,AT1G72610,AT1G74000,AT1G77510,AT1G78060,AT1G78900,AT2G01140,AT2G05920,AT2G06850,AT2G18960,AT2G19520…	GO:0043227
intracellular organelle	0.000765859	143	AT1G01080,AT1G02280,AT1G03630,AT1G04510,AT1G06950,AT1G09340,AT1G11580,AT1G14410,AT1G15820,AT1G16030,AT1G18080,AT1G20960,AT1G24360,AT1G30360,AT1G31330,AT1G31690,AT1G32990,AT1G33590,AT1G33600,AT1G41830,AT1G42970,AT1G48410,AT1G48920,AT1G49750,AT1G52400,AT1G54780,AT1G65590,AT1G67700,AT1G68560,AT1G72150,AT1G72610,AT1G74000,AT1G77510,AT1G78060,AT1G78900,AT2G01140,AT2G05920,AT2G06850,AT2G18960,AT2G19520…	GO:0043229
organelle	0.00115345	143	AT1G01080,AT1G02280,AT1G03630,AT1G04510,AT1G06950,AT1G09340,AT1G11580,AT1G14410,AT1G15820,AT1G16030,AT1G18080,AT1G20960,AT1G24360,AT1G30360,AT1G31330,AT1G31690,AT1G32990,AT1G33590,AT1G33600,AT1G41830,AT1G42970,AT1G48410,AT1G48920,AT1G49750,AT1G52400,AT1G54780,AT1G65590,AT1G67700,AT1G68560,AT1G72150,AT1G72610,AT1G74000,AT1G77510,AT1G78060,AT1G78900,AT2G01140,AT2G05920,AT2G06850,AT2G18960,AT2G19520…	GO:0043226
protein-containing complex	0.00218875	49	AT1G04170,AT1G04510,AT1G06950,AT1G09340,AT1G15820,AT1G18080,AT1G20960,AT1G31330,AT1G32990,AT1G78900,AT2G19520,AT2G33340,AT2G34420,AT2G35410,AT2G38040,AT2G40290,AT2G42910,AT3G08940,AT3G10690,AT3G46740,AT3G47470,AT3G52590,AT3G55220,AT3G62120,AT4G02770,AT4G04640,AT4G10340,AT4G21150,AT4G25550,AT4G32720,AT4G34110,AT5G01530,AT5G07350,AT5G24490,AT5G28540,AT5G30510,AT5G50920,AT5G59970,AT5G61780,AT5G66680…	GO:0032991
ribosome	0.0072627	16	AT1G09340,AT1G18080,AT1G32990,AT2G21330,AT3G13470,AT3G18080,AT3G52590,AT3G63140,AT4G29060,AT4G35090,AT4G37930,AT5G24490,AT5G25980,AT5G30510,AT5G38420,ATCG00490	GO:0005840
mitochondrion	0.00769145	38	AT1G24360,AT1G48920,AT1G67700,AT1G68560,AT1G72150,AT1G72610,AT1G77510,AT1G78060,AT1G78900,AT2G01140,AT2G05920,AT2G06850,AT2G19520,AT2G21330,AT2G33150,AT2G36460,AT3G04120,AT3G10690,AT3G13470,AT3G46740,AT3G52930,AT4G01130,AT4G04640,AT4G10750,AT4G11010,AT4G20360,AT4G21150,AT4G29060,AT4G35000,AT4G35090,AT4G37930,AT5G23060,AT5G23210,AT5G50920,AT5G60390,ATCG00120,ATCG00270,ATCG00480	GO:0005739
non-membrane-bounded organelle	0.0093952	34	AT1G04510,AT1G09340,AT1G14410,AT1G18080,AT1G20960,AT1G32990,AT1G48920,AT2G19520,AT2G21330,AT2G33150,AT3G10690,AT3G13470,AT3G18080,AT3G46780,AT3G51800,AT3G52590,AT3G52930,AT3G63140,AT4G20360,AT4G29060,AT4G32720,AT4G35090,AT4G37930,AT5G07350,AT5G24490,AT5G25980,AT5G30510,AT5G38420,AT5G46070,AT5G59970,AT5G61780,AT5G66680,AT5G67630,ATCG00490	GO:0043228
intracellular non-membrane-bounded organelle	0.0093952	34	AT1G04510,AT1G09340,AT1G14410,AT1G18080,AT1G20960,AT1G32990,AT1G48920,AT2G19520,AT2G21330,AT2G33150,AT3G10690,AT3G13470,AT3G18080,AT3G46780,AT3G51800,AT3G52590,AT3G52930,AT3G63140,AT4G20360,AT4G29060,AT4G32720,AT4G35090,AT4G37930,AT5G07350,AT5G24490,AT5G25980,AT5G30510,AT5G38420,AT5G46070,AT5G59970,AT5G61780,AT5G66680,AT5G67630,ATCG00490	GO:0043232
cytosolic ribosome	0.0186466	13	AT1G18080,AT1G32990,AT2G21330,AT3G13470,AT3G18080,AT3G52590,AT4G35090,AT4G37930,AT5G24490,AT5G25980,AT5G30510,AT5G38420,ATCG00490	GO:0022626
nucleolus	0.0192931	15	AT1G04510,AT1G20960,AT1G48920,AT2G19520,AT2G33150,AT3G13470,AT3G51800,AT3G52590,AT3G52930,AT4G20360,AT4G32720,AT5G46070,AT5G59970,AT5G66680,AT5G67630	GO:0005730
thylakoid lumen	0.0360017	6	AT1G54780,AT2G21330,AT3G26060,AT4G11010,ATCG00120,ATCG00480	GO:0031977
His6-MBP-Csy4* all negative
GO MF	p-value	number	AGIs	GO
none
GO BP	p-value	number	AGIs	GO
photosynthesis	6.01575e-05	10	AT1G12900,AT1G20020,AT1G32060,AT1G44575,AT1G67090,AT3G01500,AT4G01050,AT5G64040,AT5G66190,AT5G66570	GO:0015979
GO CC	p-value	number	AGIs	GO
apoplast	2.08106e-13	22	AT1G09750,AT1G12900,AT1G20020,AT1G32060,AT1G67090,AT1G76160,AT1G78820,AT1G78830,AT1G78850,AT2G10940,AT2G28000,AT2G38540,AT3G01500,AT3G14210,AT3G54400,AT4G34260,AT4G37800,AT5G20950,AT5G26000,AT5G49360,AT5G66190,AT5G66570	GO:0048046
cell wall	1.62349e-12	26	AT1G03230,AT1G04040,AT1G09750,AT1G20190,AT1G69530,AT1G71695,AT1G76160,AT1G78820,AT1G78830,AT1G78850,AT2G38540,AT3G02230,AT3G08030,AT3G44110,AT3G54400,AT3G55430,AT4G14960,AT4G29010,AT4G37800,AT5G16590,AT5G20950,AT5G22650,AT5G23400,AT5G26830,AT5G45280,AT5G49360	GO:0005618
external encapsulating structure	2.66684e-12	26	AT1G03230,AT1G04040,AT1G09750,AT1G20190,AT1G69530,AT1G71695,AT1G76160,AT1G78820,AT1G78830,AT1G78850,AT2G38540,AT3G02230,AT3G08030,AT3G44110,AT3G54400,AT3G55430,AT4G14960,AT4G29010,AT4G37800,AT5G16590,AT5G20950,AT5G22650,AT5G23400,AT5G26830,AT5G45280,AT5G49360	GO:0030312
extracellular region	1.05866e-10	39	AT1G03230,AT1G04040,AT1G09750,AT1G12900,AT1G15690,AT1G20020,AT1G20190,AT1G32060,AT1G54010,AT1G67090,AT1G69530,AT1G71695,AT1G72970,AT1G76160,AT1G78820,AT1G78830,AT1G78850,AT2G05380,AT2G10940,AT2G28000,AT2G38540,AT2G45180,AT3G01500,AT3G12145,AT3G14210,AT3G20370,AT3G54400,AT3G55430,AT4G21650,AT4G22010,AT4G34260,AT4G37800,AT5G20950,AT5G23400,AT5G26000,AT5G45280,AT5G49360,AT5G66190,AT5G66570	GO:0005576
thylakoid	4.18365e-07	18	AT1G20020,AT1G32060,AT1G44575,AT1G67090,AT2G10940,AT2G17630,AT2G28000,AT2G38540,AT2G45180,AT3G01500,AT3G26070,AT3G52150,AT4G01050,AT4G39960,AT5G26000,AT5G64040,AT5G66190,AT5G66570	GO:0009579
chloroplast thylakoid membrane protein complex	6.06521e-06	5	AT1G20020,AT1G44575,AT4G01050,AT5G64040,AT5G66190	GO:0098807
chloroplast thylakoid	7.61888e-06	16	AT1G20020,AT1G32060,AT1G44575,AT1G67090,AT2G10940,AT2G17630,AT2G38540,AT2G45180,AT3G01500,AT3G26070,AT3G52150,AT4G01050,AT4G39960,AT5G64040,AT5G66190,AT5G66570	GO:0009534
plastid thylakoid	7.80165e-06	16	AT1G20020,AT1G32060,AT1G44575,AT1G67090,AT2G10940,AT2G17630,AT2G38540,AT2G45180,AT3G01500,AT3G26070,AT3G52150,AT4G01050,AT4G39960,AT5G64040,AT5G66190,AT5G66570	GO:0031976
plastid	1.46753e-05	34	AT1G12900,AT1G15690,AT1G20020,AT1G32060,AT1G32900,AT1G44575,AT1G67090,AT2G02740,AT2G10940,AT2G17630,AT2G28000,AT2G38540,AT2G42520,AT2G45180,AT3G01500,AT3G08030,AT3G11130,AT3G14210,AT3G26070,AT3G52150,AT4G01050,AT4G34200,AT4G34260,AT4G39960,AT5G16590,AT5G20950,AT5G22650,AT5G26000,AT5G26830,AT5G49360,AT5G59370,AT5G64040,AT5G66190,AT5G66570	GO:0009536
cell-cell junction	1.47698e-05	21	AT1G04040,AT1G54010,AT1G58270,AT1G71695,AT1G76030,AT1G76160,AT1G78830,AT2G10940,AT2G45960,AT3G11130,AT3G14210,AT3G20370,AT3G44110,AT3G55430,AT4G14960,AT4G22010,AT4G29010,AT5G16590,AT5G20950,AT5G23400,AT5G45280	GO:0005911
plasmodesma	1.47698e-05	21	AT1G04040,AT1G54010,AT1G58270,AT1G71695,AT1G76030,AT1G76160,AT1G78830,AT2G10940,AT2G45960,AT3G11130,AT3G14210,AT3G20370,AT3G44110,AT3G55430,AT4G14960,AT4G22010,AT4G29010,AT5G16590,AT5G20950,AT5G23400,AT5G45280	GO:0009506
cell junction	1.47698e-05	21	AT1G04040,AT1G54010,AT1G58270,AT1G71695,AT1G76030,AT1G76160,AT1G78830,AT2G10940,AT2G45960,AT3G11130,AT3G14210,AT3G20370,AT3G44110,AT3G55430,AT4G14960,AT4G22010,AT4G29010,AT5G16590,AT5G20950,AT5G23400,AT5G45280	GO:0030054
anchoring junction	1.47698e-05	21	AT1G04040,AT1G54010,AT1G58270,AT1G71695,AT1G76030,AT1G76160,AT1G78830,AT2G10940,AT2G45960,AT3G11130,AT3G14210,AT3G20370,AT3G44110,AT3G55430,AT4G14960,AT4G22010,AT4G29010,AT5G16590,AT5G20950,AT5G23400,AT5G45280	GO:0070161
symplast	1.49592e-05	21	AT1G04040,AT1G54010,AT1G58270,AT1G71695,AT1G76030,AT1G76160,AT1G78830,AT2G10940,AT2G45960,AT3G11130,AT3G14210,AT3G20370,AT3G44110,AT3G55430,AT4G14960,AT4G22010,AT4G29010,AT5G16590,AT5G20950,AT5G23400,AT5G45280	GO:0055044
secretory vesicle	3.71929e-05	9	AT1G09750,AT1G76160,AT1G78830,AT1G78850,AT2G10940,AT2G38540,AT3G08030,AT3G14210,AT5G26000	GO:0099503
chloroplast thylakoid membrane	9.43061e-05	14	AT1G20020,AT1G32060,AT1G44575,AT1G67090,AT2G10940,AT2G45180,AT3G01500,AT3G26070,AT3G52150,AT4G01050,AT4G39960,AT5G64040,AT5G66190,AT5G66570	GO:0009535
plastid thylakoid membrane	9.66339e-05	14	AT1G20020,AT1G32060,AT1G44575,AT1G67090,AT2G10940,AT2G45180,AT3G01500,AT3G26070,AT3G52150,AT4G01050,AT4G39960,AT5G64040,AT5G66190,AT5G66570	GO:0055035
thylakoid membrane	0.000136749	14	AT1G20020,AT1G32060,AT1G44575,AT1G67090,AT2G10940,AT2G45180,AT3G01500,AT3G26070,AT3G52150,AT4G01050,AT4G39960,AT5G64040,AT5G66190,AT5G66570	GO:0042651
photosynthetic membrane	0.000143422	14	AT1G20020,AT1G32060,AT1G44575,AT1G67090,AT2G10940,AT2G45180,AT3G01500,AT3G26070,AT3G52150,AT4G01050,AT4G39960,AT5G64040,AT5G66190,AT5G66570	GO:0034357
chloroplast	0.000219702	29	AT1G12900,AT1G15690,AT1G20020,AT1G32060,AT1G32900,AT1G44575,AT1G67090,AT2G02740,AT2G10940,AT2G17630,AT2G28000,AT2G38540,AT2G42520,AT2G45180,AT3G01500,AT3G08030,AT3G11130,AT3G14210,AT3G26070,AT3G52150,AT4G01050,AT4G34200,AT4G34260,AT4G39960,AT5G26000,AT5G26830,AT5G64040,AT5G66190,AT5G66570	GO:0009507
cell periphery	0.000229238	39	AT1G03230,AT1G04040,AT1G09750,AT1G15690,AT1G20190,AT1G69530,AT1G71695,AT1G76030,AT1G76160,AT1G78820,AT1G78830,AT1G78850,AT1G78920,AT2G10940,AT2G38540,AT2G45960,AT3G01500,AT3G02230,AT3G08030,AT3G11130,AT3G12145,AT3G20370,AT3G44110,AT3G54400,AT3G55430,AT4G14960,AT4G29010,AT4G34200,AT4G37800,AT4G39960,AT5G03740,AT5G16590,AT5G20950,AT5G22650,AT5G23400,AT5G26830,AT5G45280,AT5G49360,AT5G49460	GO:0071944
plastid envelope	0.00027175	18	AT1G12900,AT1G15690,AT1G20020,AT1G32060,AT1G44575,AT1G67090,AT2G10940,AT2G28000,AT2G45180,AT3G01500,AT3G14210,AT3G26070,AT3G52150,AT4G01050,AT4G39960,AT5G64040,AT5G66190,AT5G66570	GO:0009526
chloroplast stroma	0.000695497	13	AT1G12900,AT1G20020,AT1G32060,AT1G67090,AT2G02740,AT2G17630,AT2G28000,AT3G01500,AT3G26070,AT3G52150,AT4G34200,AT5G66190,AT5G66570	GO:0009570
plastid stroma	0.000775646	13	AT1G12900,AT1G20020,AT1G32060,AT1G67090,AT2G02740,AT2G17630,AT2G28000,AT3G01500,AT3G26070,AT3G52150,AT4G34200,AT5G66190,AT5G66570	GO:0009532
vacuole	0.00178452	15	AT1G04040,AT1G15690,AT1G54010,AT1G71695,AT1G76030,AT1G78850,AT1G78920,AT2G45960,AT3G02230,AT3G11130,AT3G14210,AT4G14960,AT5G22650,AT5G26000,AT5G44120	GO:0005773
cytoplasm	0.00269785	59	AT1G03230,AT1G04040,AT1G09750,AT1G12900,AT1G15690,AT1G20020,AT1G32060,AT1G32900,AT1G44575,AT1G54010,AT1G67090,AT1G69530,AT1G71695,AT1G76030,AT1G76160,AT1G78830,AT1G78850,AT1G78920,AT2G02740,AT2G05380,AT2G10940,AT2G17630,AT2G28000,AT2G38540,AT2G42520,AT2G45180,AT2G45960,AT3G01500,AT3G02230,AT3G08030,AT3G11130,AT3G12145,AT3G14210,AT3G19760,AT3G26070,AT3G44110,AT3G52150,AT3G54400,AT4G01050,AT4G14960…	GO:0005737
plant-type cell wall	0.00883279	15	AT1G04040,AT1G69530,AT1G71695,AT1G78830,AT2G38540,AT3G02230,AT3G44110,AT4G14960,AT4G29010,AT5G16590,AT5G20950,AT5G22650,AT5G26830,AT5G45280,AT5G49360	GO:0009505
plastid membrane	0.00905057	14	AT1G20020,AT1G32060,AT1G44575,AT1G67090,AT2G10940,AT2G45180,AT3G01500,AT3G26070,AT3G52150,AT4G01050,AT4G39960,AT5G64040,AT5G66190,AT5G66570	GO:0042170
organelle envelope	0.00957866	19	AT1G12900,AT1G15690,AT1G20020,AT1G32060,AT1G44575,AT1G67090,AT2G10940,AT2G28000,AT2G45180,AT3G01500,AT3G08030,AT3G14210,AT3G26070,AT3G52150,AT4G01050,AT4G39960,AT5G64040,AT5G66190,AT5G66570	GO:0031967
envelope	0.00957866	19	AT1G12900,AT1G15690,AT1G20020,AT1G32060,AT1G44575,AT1G67090,AT2G10940,AT2G28000,AT2G45180,AT3G01500,AT3G08030,AT3G14210,AT3G26070,AT3G52150,AT4G01050,AT4G39960,AT5G64040,AT5G66190,AT5G66570	GO:0031975
organelle subcompartment	0.0408305	18	AT1G20020,AT1G32060,AT1G44575,AT1G67090,AT1G78920,AT2G10940,AT2G17630,AT2G38540,AT2G45180,AT3G01500,AT3G02230,AT3G26070,AT3G52150,AT4G01050,AT4G39960,AT5G64040,AT5G66190,AT5G66570	GO:0031984
cytoplasmic vesicle	0.0416216	12	AT1G09750,AT1G15690,AT1G76160,AT1G78830,AT1G78850,AT1G78920,AT2G10940,AT2G38540,AT3G08030,AT3G11130,AT3G14210,AT5G26000	GO:0031410
intracellular vesicle	0.0420866	12	AT1G09750,AT1G15690,AT1G76160,AT1G78830,AT1G78850,AT1G78920,AT2G10940,AT2G38540,AT3G08030,AT3G11130,AT3G14210,AT5G26000	GO:0097708

## Sheet: GO His6-Strep-Csy4
His6-Strep-Csy4* significantly enriched
GO MF	p-value	number	AGIs	GO
RNA binding	2.26565e-09	26	AT1G01080,AT1G02140,AT1G04170,AT1G14410,AT1G14650,AT1G17220,AT1G20020,AT1G29250,AT1G48410,AT1G48920,AT1G56070,AT2G02740,AT2G18510,AT2G36460,AT2G37220,AT3G13224,AT3G26420,AT3G44110,AT3G52930,AT3G55220,AT4G30690,AT5G04280,AT5G17920,AT5G40490,AT5G44500,AT5G50920	GO:0003723
mRNA binding	6.20329e-06	20	AT1G01080,AT1G14410,AT1G17220,AT1G29250,AT1G48410,AT1G48920,AT1G56070,AT2G02740,AT2G18510,AT2G36460,AT2G37220,AT3G13224,AT3G26420,AT3G44110,AT3G52930,AT4G30690,AT5G04280,AT5G17920,AT5G40490,AT5G50920	GO:0003729
nucleic acid binding	0.000220584	30	AT1G01080,AT1G02140,AT1G04170,AT1G14410,AT1G14650,AT1G17220,AT1G20020,AT1G29250,AT1G48410,AT1G48920,AT1G56070,AT2G02740,AT2G18510,AT2G27100,AT2G32600,AT2G36460,AT2G37220,AT3G13224,AT3G26420,AT3G44110,AT3G52930,AT3G55220,AT4G30690,AT4G39680,AT5G03740,AT5G04280,AT5G17920,AT5G40490,AT5G44500,AT5G50920	GO:0003676
fructose-bisphosphate aldolase activity	0.00417326	3	AT2G21330,AT2G36460,AT3G52930	GO:0004332
GO BP	p-value	number	AGIs	GO
mRNA splicing, via spliceosome	0.00448581	9	AT1G14650,AT2G18510,AT2G27100,AT2G32600,AT2G33340,AT3G55220,AT4G21660,AT5G04280,AT5G44500	GO:0000398
RNA splicing	0.00545222	10	AT1G02140,AT1G14650,AT2G18510,AT2G27100,AT2G32600,AT2G33340,AT3G55220,AT4G21660,AT5G04280,AT5G44500	GO:0008380
mRNA processing	0.00620353	12	AT1G02140,AT1G14650,AT2G18510,AT2G27100,AT2G32600,AT2G33340,AT2G37220,AT3G55220,AT4G21660,AT5G04280,AT5G40490,AT5G44500	GO:0006397
RNA splicing, via transesterification reactions	0.00990404	9	AT1G14650,AT2G18510,AT2G27100,AT2G32600,AT2G33340,AT3G55220,AT4G21660,AT5G04280,AT5G44500	GO:0000375
RNA splicing, via transesterification reactions with bulged adenosine as nucleophile	0.00990404	9	AT1G14650,AT2G18510,AT2G27100,AT2G32600,AT2G33340,AT3G55220,AT4G21660,AT5G04280,AT5G44500	GO:0000377
fructose 1,6-bisphosphate metabolic process	0.0159764	3	AT2G21330,AT2G36460,AT3G52930	GO:0030388
mRNA metabolic process	0.0389397	12	AT1G02140,AT1G14650,AT2G18510,AT2G27100,AT2G32600,AT2G33340,AT2G37220,AT3G55220,AT4G21660,AT5G04280,AT5G40490,AT5G44500	GO:0016071
RNA processing	0.0465084	15	AT1G01080,AT1G02140,AT1G14650,AT1G29250,AT1G48920,AT2G18510,AT2G27100,AT2G32600,AT2G33340,AT2G37220,AT3G55220,AT4G21660,AT5G04280,AT5G40490,AT5G44500	GO:0006396
GO CC	p-value	number	AGIs	GO
nucleolus	0.000142453	12	AT1G02140,AT1G48920,AT1G56070,AT2G18510,AT2G27100,AT3G44110,AT3G52930,AT5G03740,AT5G04280,AT5G22650,AT5G44500,AT5G46070	GO:0005730
intracellular membrane-bounded organelle	0.000290019	45	AT1G01080,AT1G02140,AT1G08450,AT1G14410,AT1G14650,AT1G17220,AT1G20020,AT1G29250,AT1G48410,AT1G48920,AT1G56070,AT1G68260,AT2G02740,AT2G18510,AT2G21330,AT2G22230,AT2G27100,AT2G32600,AT2G32920,AT2G33340,AT2G36460,AT2G37220,AT3G12140,AT3G12800,AT3G13224,AT3G26420,AT3G27925,AT3G44110,AT3G52930,AT3G55220,AT4G05530,AT4G21660,AT4G28520,AT4G30690,AT5G03740,AT5G04280,AT5G17920,AT5G22650,AT5G23210,AT5G26830…	GO:0043231
membrane-bounded organelle	0.000377175	45	AT1G01080,AT1G02140,AT1G08450,AT1G14410,AT1G14650,AT1G17220,AT1G20020,AT1G29250,AT1G48410,AT1G48920,AT1G56070,AT1G68260,AT2G02740,AT2G18510,AT2G21330,AT2G22230,AT2G27100,AT2G32600,AT2G32920,AT2G33340,AT2G36460,AT2G37220,AT3G12140,AT3G12800,AT3G13224,AT3G26420,AT3G27925,AT3G44110,AT3G52930,AT3G55220,AT4G05530,AT4G21660,AT4G28520,AT4G30690,AT5G03740,AT5G04280,AT5G17920,AT5G22650,AT5G23210,AT5G26830…	GO:0043227
intracellular anatomical structure	0.000449953	49	AT1G01080,AT1G02140,AT1G04170,AT1G08450,AT1G14410,AT1G14650,AT1G17220,AT1G20020,AT1G29250,AT1G48410,AT1G48920,AT1G56070,AT1G68260,AT2G02740,AT2G18510,AT2G21330,AT2G22230,AT2G27100,AT2G32600,AT2G32920,AT2G33340,AT2G36460,AT2G37220,AT2G42910,AT3G12140,AT3G12800,AT3G13224,AT3G26420,AT3G27925,AT3G44110,AT3G52930,AT3G55220,AT4G05530,AT4G21660,AT4G28480,AT4G28520,AT4G30690,AT4G39680,AT5G03740,AT5G04280…	GO:0005622
U2 snRNP	0.000518994	5	AT1G14650,AT2G32600,AT3G55220,AT4G21660,AT5G44500	GO:0005686
intracellular organelle	0.00130895	45	AT1G01080,AT1G02140,AT1G08450,AT1G14410,AT1G14650,AT1G17220,AT1G20020,AT1G29250,AT1G48410,AT1G48920,AT1G56070,AT1G68260,AT2G02740,AT2G18510,AT2G21330,AT2G22230,AT2G27100,AT2G32600,AT2G32920,AT2G33340,AT2G36460,AT2G37220,AT3G12140,AT3G12800,AT3G13224,AT3G26420,AT3G27925,AT3G44110,AT3G52930,AT3G55220,AT4G05530,AT4G21660,AT4G28520,AT4G30690,AT5G03740,AT5G04280,AT5G17920,AT5G22650,AT5G23210,AT5G26830…	GO:0043229
organelle	0.00158991	45	AT1G01080,AT1G02140,AT1G08450,AT1G14410,AT1G14650,AT1G17220,AT1G20020,AT1G29250,AT1G48410,AT1G48920,AT1G56070,AT1G68260,AT2G02740,AT2G18510,AT2G21330,AT2G22230,AT2G27100,AT2G32600,AT2G32920,AT2G33340,AT2G36460,AT2G37220,AT3G12140,AT3G12800,AT3G13224,AT3G26420,AT3G27925,AT3G44110,AT3G52930,AT3G55220,AT4G05530,AT4G21660,AT4G28520,AT4G30690,AT5G03740,AT5G04280,AT5G17920,AT5G22650,AT5G23210,AT5G26830…	GO:0043226
catalytic step 2 spliceosome	0.00465165	5	AT1G14650,AT2G32600,AT2G33340,AT4G21660,AT5G44500	GO:0071013
U2-type spliceosomal complex	0.00651179	5	AT1G14650,AT2G32600,AT2G33340,AT4G21660,AT5G44500	GO:0005684
membrane-enclosed lumen	0.00993095	15	AT1G02140,AT1G08450,AT1G48920,AT1G56070,AT2G18510,AT2G27100,AT2G32920,AT3G13224,AT3G44110,AT3G52930,AT5G03740,AT5G04280,AT5G22650,AT5G44500,AT5G46070	GO:0031974
organelle lumen	0.00993095	15	AT1G02140,AT1G08450,AT1G48920,AT1G56070,AT2G18510,AT2G27100,AT2G32920,AT3G13224,AT3G44110,AT3G52930,AT5G03740,AT5G04280,AT5G22650,AT5G44500,AT5G46070	GO:0043233
intracellular organelle lumen	0.00993095	15	AT1G02140,AT1G08450,AT1G48920,AT1G56070,AT2G18510,AT2G27100,AT2G32920,AT3G13224,AT3G44110,AT3G52930,AT5G03740,AT5G04280,AT5G22650,AT5G44500,AT5G46070	GO:0070013
plastid	0.0107672	22	AT1G01080,AT1G08450,AT1G14410,AT1G17220,AT1G20020,AT1G56070,AT1G68260,AT2G02740,AT2G21330,AT2G22230,AT2G32920,AT2G37220,AT3G27925,AT3G52930,AT4G05530,AT4G30690,AT5G17920,AT5G22650,AT5G26830,AT5G40490,AT5G46070,AT5G50920	GO:0009536
spliceosomal snRNP complex	0.0174365	5	AT1G14650,AT2G32600,AT3G55220,AT4G21660,AT5G44500	GO:0097525
small nuclear ribonucleoprotein complex	0.0185282	5	AT1G14650,AT2G32600,AT3G55220,AT4G21660,AT5G44500	GO:0030532
chloroplast	0.0203729	19	AT1G01080,AT1G08450,AT1G14410,AT1G17220,AT1G20020,AT1G56070,AT1G68260,AT2G02740,AT2G21330,AT2G22230,AT2G32920,AT2G37220,AT3G27925,AT3G52930,AT4G05530,AT4G30690,AT5G17920,AT5G26830,AT5G50920	GO:0009507
Sm-like protein family complex	0.0248202	5	AT1G14650,AT2G32600,AT3G55220,AT4G21660,AT5G44500	GO:0120114
nuclear lumen	0.0427934	13	AT1G02140,AT1G48920,AT1G56070,AT2G18510,AT2G27100,AT3G13224,AT3G44110,AT3G52930,AT5G03740,AT5G04280,AT5G22650,AT5G44500,AT5G46070	GO:0031981
chloroplast stroma	0.0448199	9	AT1G01080,AT1G14410,AT1G17220,AT1G20020,AT2G02740,AT2G21330,AT2G37220,AT5G17920,AT5G50920	GO:0009570
plastid stroma	0.0483114	9	AT1G01080,AT1G14410,AT1G17220,AT1G20020,AT2G02740,AT2G21330,AT2G37220,AT5G17920,AT5G50920	GO:0009532
His6-Strep-Csy4 all positive
GO MF	p-value	number	AGIs	GO
RNA binding	3.33249e-38	106	AT1G01080,AT1G02140,AT1G04170,AT1G06220,AT1G06960,AT1G09340,AT1G09760,AT1G11860,AT1G12900,AT1G12920,AT1G14410,AT1G14650,AT1G17220,AT1G20020,AT1G20580,AT1G20960,AT1G24450,AT1G29250,AT1G32990,AT1G42970,AT1G48410,AT1G48920,AT1G51510,AT1G54780,AT1G56070,AT1G67700,AT1G77180,AT2G02740,AT2G18510,AT2G18740,AT2G21660,AT2G24060,AT2G33730,AT2G33800,AT2G34040,AT2G34420,AT2G36460,AT2G37220,AT2G38770,AT2G39730…	GO:0003723
mRNA binding	7.06743e-34	83	AT1G01080,AT1G09340,AT1G11860,AT1G12900,AT1G12920,AT1G14410,AT1G17220,AT1G29250,AT1G42970,AT1G48410,AT1G48920,AT1G51510,AT1G54780,AT1G56070,AT1G67700,AT2G02740,AT2G18510,AT2G21660,AT2G24060,AT2G33800,AT2G34040,AT2G34420,AT2G36460,AT2G37220,AT2G38770,AT2G39730,AT2G40290,AT2G42520,AT3G01500,AT3G05060,AT3G13224,AT3G13470,AT3G14310,AT3G15190,AT3G19760,AT3G26060,AT3G26420,AT3G26560,AT3G26650,AT3G44110…	GO:0003729
nucleic acid binding	4.26888e-14	119	AT1G01080,AT1G02140,AT1G04170,AT1G06220,AT1G06960,AT1G09340,AT1G09760,AT1G09770,AT1G11860,AT1G12900,AT1G12920,AT1G14410,AT1G14650,AT1G17220,AT1G20020,AT1G20580,AT1G20960,AT1G24450,AT1G29250,AT1G32990,AT1G42970,AT1G48410,AT1G48610,AT1G48920,AT1G51510,AT1G54780,AT1G56070,AT1G61730,AT1G67700,AT1G77180,AT2G02740,AT2G18510,AT2G18740,AT2G21660,AT2G24060,AT2G27100,AT2G32600,AT2G33730,AT2G33800,AT2G34040…	GO:0003676
heterocyclic compound binding	2.03751e-06	148	AT1G01080,AT1G02140,AT1G04170,AT1G06220,AT1G06960,AT1G09340,AT1G09760,AT1G09770,AT1G11860,AT1G12900,AT1G12920,AT1G14410,AT1G14650,AT1G17220,AT1G20020,AT1G20580,AT1G20960,AT1G24360,AT1G24450,AT1G29250,AT1G32060,AT1G32990,AT1G42970,AT1G48410,AT1G48610,AT1G48850,AT1G48920,AT1G51510,AT1G54780,AT1G56070,AT1G61730,AT1G67700,AT1G77180,AT2G02740,AT2G04842,AT2G18510,AT2G18740,AT2G21660,AT2G22360,AT2G24060…	GO:1901363
organic cyclic compound binding	2.6761e-06	149	AT1G01080,AT1G02140,AT1G04170,AT1G06220,AT1G06960,AT1G09340,AT1G09760,AT1G09770,AT1G11860,AT1G12900,AT1G12920,AT1G14410,AT1G14650,AT1G17220,AT1G20020,AT1G20580,AT1G20960,AT1G24360,AT1G24450,AT1G29250,AT1G32060,AT1G32990,AT1G42970,AT1G48410,AT1G48610,AT1G48850,AT1G48920,AT1G51510,AT1G54780,AT1G56070,AT1G61730,AT1G67700,AT1G72150,AT1G77180,AT2G02740,AT2G04842,AT2G18510,AT2G18740,AT2G21660,AT2G22360…	GO:0097159
fructose-bisphosphate aldolase activity	7.19713e-05	5	AT2G01140,AT2G21330,AT2G36460,AT3G52930,AT4G38970	GO:0004332
aminoacyl-tRNA ligase activity	0.000555173	9	AT1G44835,AT2G04842,AT3G02760,AT3G04600,AT3G11710,AT3G62120,AT4G31180,AT5G03406,AT5G26830	GO:0004812
ligase activity, forming carbon-oxygen bonds	0.000555173	9	AT1G44835,AT2G04842,AT3G02760,AT3G04600,AT3G11710,AT3G62120,AT4G31180,AT5G03406,AT5G26830	GO:0016875
glyceraldehyde-3-phosphate dehydrogenase (NADP+) (phosphorylating) activity	0.00760867	3	AT1G12900,AT1G42970,AT3G26650	GO:0047100
snRNA binding	0.00985536	5	AT1G06220,AT1G09760,AT2G47580,AT3G50670,AT3G55220	GO:0017069
translation factor activity, RNA binding	0.0172084	11	AT1G04170,AT1G12920,AT1G17220,AT1G56070,AT2G24060,AT2G40290,AT4G20360,AT4G30690,AT4G35250,AT5G20920,AT5G57870	GO:0008135
translation regulator activity, nucleic acid binding	0.0284036	11	AT1G04170,AT1G12920,AT1G17220,AT1G56070,AT2G24060,AT2G40290,AT4G20360,AT4G30690,AT4G35250,AT5G20920,AT5G57870	GO:0090079
aldehyde-lyase activity	0.0289657	6	AT2G01140,AT2G21330,AT2G36460,AT3G52930,AT4G10750,AT4G38970	GO:0016832
translation regulator activity	0.0339839	11	AT1G04170,AT1G12920,AT1G17220,AT1G56070,AT2G24060,AT2G40290,AT4G20360,AT4G30690,AT4G35250,AT5G20920,AT5G57870	GO:0045182
GO BP	p-value	number	AGIs	GO
mRNA splicing, via spliceosome	1.67635e-15	29	AT1G04510,AT1G06220,AT1G06960,AT1G09760,AT1G09770,AT1G14650,AT1G20580,AT1G20960,AT1G77180,AT2G18510,AT2G18740,AT2G21660,AT2G27100,AT2G32600,AT2G33340,AT2G33730,AT2G38770,AT2G47580,AT3G18790,AT3G26560,AT3G50670,AT3G55220,AT4G02840,AT4G21660,AT5G04280,AT5G06160,AT5G12190,AT5G44500,AT5G64270	GO:0000398
RNA splicing, via transesterification reactions	3.77036e-14	29	AT1G04510,AT1G06220,AT1G06960,AT1G09760,AT1G09770,AT1G14650,AT1G20580,AT1G20960,AT1G77180,AT2G18510,AT2G18740,AT2G21660,AT2G27100,AT2G32600,AT2G33340,AT2G33730,AT2G38770,AT2G47580,AT3G18790,AT3G26560,AT3G50670,AT3G55220,AT4G02840,AT4G21660,AT5G04280,AT5G06160,AT5G12190,AT5G44500,AT5G64270	GO:0000375
RNA splicing, via transesterification reactions with bulged adenosine as nucleophile	3.77036e-14	29	AT1G04510,AT1G06220,AT1G06960,AT1G09760,AT1G09770,AT1G14650,AT1G20580,AT1G20960,AT1G77180,AT2G18510,AT2G18740,AT2G21660,AT2G27100,AT2G32600,AT2G33340,AT2G33730,AT2G38770,AT2G47580,AT3G18790,AT3G26560,AT3G50670,AT3G55220,AT4G02840,AT4G21660,AT5G04280,AT5G06160,AT5G12190,AT5G44500,AT5G64270	GO:0000377
RNA splicing	9.75534e-14	33	AT1G02140,AT1G04510,AT1G06220,AT1G06960,AT1G09760,AT1G09770,AT1G14650,AT1G20580,AT1G20960,AT1G51510,AT1G77180,AT2G18510,AT2G18740,AT2G21660,AT2G27100,AT2G32600,AT2G33340,AT2G33730,AT2G38770,AT2G47580,AT3G18790,AT3G19760,AT3G26560,AT3G50670,AT3G53460,AT3G55220,AT4G02840,AT4G21660,AT5G04280,AT5G06160,AT5G12190,AT5G44500,AT5G64270	GO:0008380
mRNA processing	3.50676e-13	38	AT1G02140,AT1G04510,AT1G06220,AT1G06960,AT1G09760,AT1G09770,AT1G14650,AT1G20580,AT1G20960,AT1G51510,AT1G77180,AT2G18510,AT2G18740,AT2G21660,AT2G27100,AT2G32600,AT2G33340,AT2G33730,AT2G37220,AT2G38770,AT2G47580,AT3G18790,AT3G19760,AT3G26560,AT3G50670,AT3G53460,AT3G55220,AT4G02840,AT4G21660,AT4G25550,AT5G04280,AT5G06160,AT5G12190,AT5G40490,AT5G44500,AT5G55670,AT5G61780,AT5G64270	GO:0006397
mRNA metabolic process	2.77937e-10	38	AT1G02140,AT1G04510,AT1G06220,AT1G06960,AT1G09760,AT1G09770,AT1G14650,AT1G20580,AT1G20960,AT1G51510,AT1G77180,AT2G18510,AT2G18740,AT2G21660,AT2G27100,AT2G32600,AT2G33340,AT2G33730,AT2G37220,AT2G38770,AT2G47580,AT3G18790,AT3G19760,AT3G26560,AT3G50670,AT3G53460,AT3G55220,AT4G02840,AT4G21660,AT4G25550,AT5G04280,AT5G06160,AT5G12190,AT5G40490,AT5G44500,AT5G55670,AT5G61780,AT5G64270	GO:0016071
photosynthesis	1.96066e-09	24	AT1G03600,AT1G03630,AT1G12900,AT1G15980,AT1G20020,AT1G32060,AT1G42970,AT1G54780,AT2G34420,AT3G01500,AT3G26650,AT3G27925,AT3G50820,AT4G01050,AT4G03280,AT4G04640,AT4G10340,AT4G21280,AT4G27440,AT4G35250,AT5G64040,AT5G66190,ATCG00350,ATCG00490	GO:0015979
RNA processing	9.95304e-09	46	AT1G01080,AT1G02140,AT1G04510,AT1G06220,AT1G06960,AT1G09340,AT1G09760,AT1G09770,AT1G14650,AT1G20580,AT1G20960,AT1G24450,AT1G29250,AT1G48920,AT1G51510,AT1G77180,AT2G18510,AT2G18740,AT2G21660,AT2G27100,AT2G32600,AT2G33340,AT2G33730,AT2G33800,AT2G37220,AT2G38770,AT2G47580,AT3G18790,AT3G19760,AT3G26560,AT3G50670,AT3G53460,AT3G55220,AT3G63140,AT4G02840,AT4G21660,AT4G25550,AT5G04280,AT5G06160,AT5G12190…	GO:0006396
translation	5.05092e-05	31	AT1G02140,AT1G04170,AT1G09340,AT1G11580,AT1G12920,AT1G17220,AT1G32990,AT1G48410,AT1G48920,AT1G51510,AT1G56070,AT2G04842,AT2G33800,AT3G02760,AT3G04600,AT3G11710,AT3G15190,AT3G19760,AT3G44890,AT3G62120,AT3G63140,AT4G08350,AT4G20360,AT4G31180,AT5G03406,AT5G14660,AT5G20920,AT5G24490,AT5G26830,AT5G30510,AT5G62300	GO:0006412
peptide biosynthetic process	6.004e-05	31	AT1G02140,AT1G04170,AT1G09340,AT1G11580,AT1G12920,AT1G17220,AT1G32990,AT1G48410,AT1G48920,AT1G51510,AT1G56070,AT2G04842,AT2G33800,AT3G02760,AT3G04600,AT3G11710,AT3G15190,AT3G19760,AT3G44890,AT3G62120,AT3G63140,AT4G08350,AT4G20360,AT4G31180,AT5G03406,AT5G14660,AT5G20920,AT5G24490,AT5G26830,AT5G30510,AT5G62300	GO:0043043
response to cadmium ion	6.05304e-05	19	AT1G04510,AT1G11860,AT1G42970,AT1G68560,AT2G01140,AT2G21330,AT2G21660,AT2G33800,AT2G36460,AT2G47470,AT3G52930,AT4G31180,AT4G38970,AT5G02500,AT5G17920,AT5G35630,AT5G61780,AT5G63400,ATCG00490	GO:0046686
glucose metabolic process	0.000119894	9	AT1G12900,AT1G42970,AT2G01140,AT2G21330,AT2G36460,AT3G26650,AT3G47800,AT3G52930,AT4G38970	GO:0006006
amide biosynthetic process	0.000124293	32	AT1G02140,AT1G04170,AT1G09340,AT1G11580,AT1G12920,AT1G17220,AT1G32990,AT1G48410,AT1G48920,AT1G51510,AT1G56070,AT2G04842,AT2G33800,AT2G38040,AT3G02760,AT3G04600,AT3G11710,AT3G15190,AT3G19760,AT3G44890,AT3G62120,AT3G63140,AT4G08350,AT4G20360,AT4G31180,AT5G03406,AT5G14660,AT5G20920,AT5G24490,AT5G26830,AT5G30510,AT5G62300	GO:0043604
organonitrogen compound biosynthetic process	0.000137175	49	AT1G02140,AT1G03630,AT1G04170,AT1G09340,AT1G11580,AT1G12920,AT1G17220,AT1G32990,AT1G48410,AT1G48850,AT1G48920,AT1G51510,AT1G56070,AT2G01720,AT2G04842,AT2G33800,AT2G38040,AT2G39800,AT2G42910,AT3G02760,AT3G04600,AT3G11710,AT3G15190,AT3G19760,AT3G44890,AT3G57560,AT3G62120,AT3G63140,AT4G01900,AT4G04640,AT4G08350,AT4G11010,AT4G20360,AT4G27440,AT4G31180,AT4G34200,AT4G35630,AT5G03406,AT5G14660,AT5G17920…	GO:1901566
peptide metabolic process	0.000503937	32	AT1G02140,AT1G04170,AT1G09340,AT1G11580,AT1G12920,AT1G17220,AT1G32990,AT1G48410,AT1G48920,AT1G51510,AT1G56070,AT2G04842,AT2G33800,AT3G02760,AT3G04600,AT3G11710,AT3G15190,AT3G19760,AT3G44890,AT3G62120,AT3G63140,AT4G08350,AT4G20360,AT4G31180,AT4G39640,AT5G03406,AT5G14660,AT5G20920,AT5G24490,AT5G26830,AT5G30510,AT5G62300	GO:0006518
photosynthesis, light reaction	0.000519794	14	AT1G03600,AT1G15980,AT1G54780,AT2G34420,AT3G27925,AT3G50820,AT4G01050,AT4G03280,AT4G04640,AT4G10340,AT4G21280,AT4G35250,AT5G64040,AT5G66190	GO:0019684
gene expression	0.000901206	89	AT1G01080,AT1G02140,AT1G04170,AT1G04510,AT1G06220,AT1G06960,AT1G09340,AT1G09760,AT1G09770,AT1G10390,AT1G11580,AT1G12920,AT1G14410,AT1G14650,AT1G17220,AT1G20580,AT1G20960,AT1G24450,AT1G29250,AT1G32990,AT1G48410,AT1G48920,AT1G51510,AT1G56070,AT1G61730,AT1G69200,AT1G77180,AT1G80410,AT2G02740,AT2G04842,AT2G18510,AT2G18740,AT2G19520,AT2G21660,AT2G27100,AT2G32600,AT2G33340,AT2G33730,AT2G33800,AT2G37220…	GO:0010467
ribonucleoprotein complex subunit organization	0.000991525	13	AT1G04170,AT1G04510,AT1G20580,AT1G20960,AT1G48920,AT2G18740,AT2G32600,AT2G33340,AT3G18790,AT3G26560,AT4G02840,AT5G20920,AT5G64270	GO:0071826
cellular nitrogen compound metabolic process	0.00120826	104	AT1G01080,AT1G02140,AT1G03630,AT1G04170,AT1G04510,AT1G06220,AT1G06960,AT1G09340,AT1G09760,AT1G09770,AT1G11580,AT1G12920,AT1G14410,AT1G14650,AT1G17220,AT1G20580,AT1G20960,AT1G24450,AT1G29250,AT1G32990,AT1G48410,AT1G48920,AT1G51510,AT1G56070,AT1G61730,AT1G69200,AT1G77180,AT2G01140,AT2G02740,AT2G04842,AT2G18510,AT2G18740,AT2G19520,AT2G21330,AT2G21660,AT2G27100,AT2G32600,AT2G33340,AT2G33730,AT2G33800…	GO:0034641
fructose 1,6-bisphosphate metabolic process	0.00123475	5	AT2G01140,AT2G21330,AT2G36460,AT3G52930,AT4G38970	GO:0030388
generation of precursor metabolites and energy	0.00173959	21	AT1G03600,AT1G15980,AT1G54780,AT2G01140,AT2G21330,AT2G34420,AT2G36460,AT3G27925,AT3G50820,AT3G52930,AT4G01050,AT4G03280,AT4G04640,AT4G10340,AT4G21280,AT4G35250,AT4G38970,AT5G09660,AT5G19220,AT5G64040,AT5G66190	GO:0006091
cellular amide metabolic process	0.00274178	33	AT1G02140,AT1G04170,AT1G09340,AT1G11580,AT1G12920,AT1G17220,AT1G32990,AT1G48410,AT1G48920,AT1G51510,AT1G56070,AT2G04842,AT2G33800,AT2G38040,AT3G02760,AT3G04600,AT3G11710,AT3G15190,AT3G19760,AT3G44890,AT3G62120,AT3G63140,AT4G08350,AT4G20360,AT4G31180,AT4G39640,AT5G03406,AT5G14660,AT5G20920,AT5G24490,AT5G26830,AT5G30510,AT5G62300	GO:0043603
response to cold	0.00274768	21	AT1G06960,AT1G09340,AT1G09760,AT1G32060,AT1G42970,AT1G56070,AT2G20990,AT2G21660,AT2G33800,AT2G37220,AT2G39730,AT3G01500,AT3G09260,AT3G26420,AT3G26650,AT3G53460,AT4G35090,AT5G02500,AT5G03740,AT5G04280,ATCG00120	GO:0009409
ribonucleoprotein complex biogenesis	0.00396469	22	AT1G01080,AT1G04170,AT1G04510,AT1G09340,AT1G20580,AT1G20960,AT1G29250,AT1G48920,AT2G18740,AT2G32600,AT2G33340,AT2G33800,AT2G37220,AT3G05060,AT3G18790,AT3G53460,AT3G63140,AT4G02840,AT4G25550,AT5G20920,AT5G63420,AT5G64270	GO:0022613
response to temperature stimulus	0.00447177	27	AT1G06960,AT1G09340,AT1G09760,AT1G32060,AT1G42970,AT1G56070,AT2G20990,AT2G21660,AT2G22360,AT2G33800,AT2G37220,AT2G39730,AT3G01500,AT3G09260,AT3G26420,AT3G26650,AT3G44110,AT3G53460,AT4G35090,AT4G39960,AT5G02500,AT5G03740,AT5G04280,AT5G22060,AT5G28540,AT5G61780,ATCG00120	GO:0009266
ribonucleoprotein complex assembly	0.00568004	12	AT1G04170,AT1G04510,AT1G20580,AT1G20960,AT1G48920,AT2G18740,AT2G32600,AT2G33340,AT3G18790,AT4G02840,AT5G20920,AT5G64270	GO:0022618
tRNA aminoacylation for protein translation	0.00648451	8	AT2G04842,AT3G02760,AT3G04600,AT3G11710,AT3G62120,AT4G31180,AT5G03406,AT5G26830	GO:0006418
amino acid activation	0.00968685	8	AT2G04842,AT3G02760,AT3G04600,AT3G11710,AT3G62120,AT4G31180,AT5G03406,AT5G26830	GO:0043038
tRNA aminoacylation	0.00968685	8	AT2G04842,AT3G02760,AT3G04600,AT3G11710,AT3G62120,AT4G31180,AT5G03406,AT5G26830	GO:0043039
response to metal ion	0.0115354	19	AT1G04510,AT1G11860,AT1G42970,AT1G68560,AT2G01140,AT2G21330,AT2G21660,AT2G33800,AT2G36460,AT2G47470,AT3G52930,AT4G31180,AT4G38970,AT5G02500,AT5G17920,AT5G35630,AT5G61780,AT5G63400,ATCG00490	GO:0010038
metabolic process	0.0210634	176	AT1G01080,AT1G02140,AT1G03600,AT1G03630,AT1G04170,AT1G04510,AT1G06220,AT1G06960,AT1G08450,AT1G09340,AT1G09760,AT1G09770,AT1G10390,AT1G11580,AT1G11860,AT1G12900,AT1G12920,AT1G14410,AT1G14650,AT1G15980,AT1G17220,AT1G20020,AT1G20580,AT1G20960,AT1G24360,AT1G24450,AT1G29250,AT1G32060,AT1G32990,AT1G33811,AT1G42970,AT1G48410,AT1G48850,AT1G48920,AT1G51510,AT1G54780,AT1G56070,AT1G61620,AT1G61730,AT1G65590…	GO:0008152
primary metabolic process	0.0250992	155	AT1G01080,AT1G02140,AT1G03600,AT1G04170,AT1G04510,AT1G06220,AT1G06960,AT1G08450,AT1G09340,AT1G09760,AT1G09770,AT1G11580,AT1G11860,AT1G12900,AT1G12920,AT1G14410,AT1G14650,AT1G17220,AT1G20580,AT1G20960,AT1G24360,AT1G24450,AT1G29250,AT1G32060,AT1G32990,AT1G33811,AT1G42970,AT1G48410,AT1G48850,AT1G48920,AT1G51510,AT1G54780,AT1G56070,AT1G61620,AT1G61730,AT1G65590,AT1G68260,AT1G68560,AT1G69200,AT1G77180…	GO:0044238
ncRNA metabolic process	0.0269629	21	AT1G01080,AT1G09340,AT1G24450,AT1G29250,AT1G48920,AT2G04842,AT2G27100,AT2G33730,AT2G33800,AT2G37220,AT3G02760,AT3G04600,AT3G11710,AT3G53460,AT3G62120,AT3G63140,AT4G25550,AT4G31180,AT5G03406,AT5G26830,AT5G63420	GO:0034660
small molecule metabolic process	0.0272676	46	AT1G09340,AT1G11860,AT1G12900,AT1G24360,AT1G42970,AT1G48850,AT1G61730,AT2G01140,AT2G04842,AT2G21330,AT2G22230,AT2G33150,AT2G36460,AT2G38040,AT2G39800,AT2G42910,AT3G02760,AT3G04600,AT3G09260,AT3G11710,AT3G12290,AT3G12800,AT3G26650,AT3G47800,AT3G52930,AT3G57560,AT3G62120,AT4G01900,AT4G04640,AT4G05530,AT4G11010,AT4G16210,AT4G24350,AT4G31180,AT4G34200,AT4G35630,AT4G38970,AT5G03406,AT5G09660,AT5G17920…	GO:0044281
organic acid metabolic process	0.0397491	35	AT1G11860,AT1G24360,AT1G48850,AT1G61730,AT2G01140,AT2G04842,AT2G21330,AT2G22230,AT2G33150,AT2G36460,AT2G38040,AT2G39800,AT3G02760,AT3G04600,AT3G09260,AT3G11710,AT3G12800,AT3G52930,AT3G57560,AT3G62120,AT4G01900,AT4G05530,AT4G16210,AT4G31180,AT4G34200,AT4G35630,AT4G38970,AT5G03406,AT5G09660,AT5G17920,AT5G25980,AT5G26830,AT5G35630,AT5G61780,AT5G65410	GO:0006082
cellular macromolecule biosynthetic process	0.0407536	38	AT1G02140,AT1G04170,AT1G09340,AT1G11580,AT1G12920,AT1G14410,AT1G17220,AT1G32990,AT1G48410,AT1G48920,AT1G51510,AT1G56070,AT2G01720,AT2G04842,AT2G33800,AT3G02760,AT3G04600,AT3G11710,AT3G15190,AT3G16000,AT3G19760,AT3G28730,AT3G44890,AT3G62120,AT3G63140,AT4G08350,AT4G10710,AT4G20360,AT4G31180,AT5G03406,AT5G14660,AT5G19220,AT5G20920,AT5G24490,AT5G26830,AT5G30510,AT5G62300,AT5G66680	GO:0034645
spliceosomal conformational changes to generate catalytic conformation	0.0411355	4	AT1G04510,AT1G20960,AT2G33340,AT3G18790	GO:0000393
reductive pentose-phosphate cycle	0.048403	5	AT1G12900,AT1G32060,AT1G42970,AT3G26650,ATCG00490	GO:0019253
photosynthesis, dark reaction	0.048403	5	AT1G12900,AT1G32060,AT1G42970,AT3G26650,ATCG00490	GO:0019685
GO CC	p-value	number	AGIs	GO
thylakoid	2.22823e-26	56	AT1G01080,AT1G03600,AT1G03630,AT1G06690,AT1G11860,AT1G15980,AT1G20020,AT1G32060,AT1G42970,AT1G54780,AT1G67700,AT2G01140,AT2G10940,AT2G21330,AT2G22230,AT2G22360,AT2G28000,AT2G33800,AT2G34420,AT2G37220,AT2G39730,AT2G45180,AT3G01500,AT3G16000,AT3G18890,AT3G26060,AT3G26650,AT3G27925,AT3G46780,AT3G50820,AT3G53460,AT3G57560,AT3G63140,AT4G01050,AT4G01900,AT4G03280,AT4G04640,AT4G09010,AT4G10340,AT4G11010…	GO:0009579
plastid	2.92388e-26	129	AT1G01080,AT1G03600,AT1G03630,AT1G04980,AT1G06690,AT1G06950,AT1G08450,AT1G09340,AT1G11860,AT1G12900,AT1G14410,AT1G15980,AT1G17220,AT1G20020,AT1G24360,AT1G24450,AT1G32060,AT1G32990,AT1G42970,AT1G48850,AT1G49750,AT1G54780,AT1G56070,AT1G67700,AT1G68260,AT1G69200,AT1G78060,AT2G01140,AT2G02740,AT2G04842,AT2G10940,AT2G21330,AT2G21660,AT2G22230,AT2G22360,AT2G24060,AT2G24280,AT2G25110,AT2G28000,AT2G32920…	GO:0009536
chloroplast thylakoid	3.58681e-26	53	AT1G01080,AT1G03600,AT1G03630,AT1G06690,AT1G11860,AT1G15980,AT1G20020,AT1G32060,AT1G42970,AT1G54780,AT1G67700,AT2G01140,AT2G10940,AT2G21330,AT2G22230,AT2G22360,AT2G33800,AT2G34420,AT2G37220,AT2G39730,AT2G45180,AT3G01500,AT3G16000,AT3G18890,AT3G26060,AT3G26650,AT3G27925,AT3G46780,AT3G50820,AT3G53460,AT3G57560,AT3G63140,AT4G01050,AT4G01900,AT4G03280,AT4G04640,AT4G09010,AT4G10340,AT4G11010,AT4G20360…	GO:0009534
plastid thylakoid	3.93828e-26	53	AT1G01080,AT1G03600,AT1G03630,AT1G06690,AT1G11860,AT1G15980,AT1G20020,AT1G32060,AT1G42970,AT1G54780,AT1G67700,AT2G01140,AT2G10940,AT2G21330,AT2G22230,AT2G22360,AT2G33800,AT2G34420,AT2G37220,AT2G39730,AT2G45180,AT3G01500,AT3G16000,AT3G18890,AT3G26060,AT3G26650,AT3G27925,AT3G46780,AT3G50820,AT3G53460,AT3G57560,AT3G63140,AT4G01050,AT4G01900,AT4G03280,AT4G04640,AT4G09010,AT4G10340,AT4G11010,AT4G20360…	GO:0031976
plastid envelope	3.6815e-23	65	AT1G01080,AT1G03600,AT1G03630,AT1G06690,AT1G06950,AT1G09340,AT1G11860,AT1G12900,AT1G15980,AT1G17220,AT1G20020,AT1G24360,AT1G32060,AT1G32990,AT1G42970,AT1G54780,AT1G67700,AT2G10940,AT2G21330,AT2G22360,AT2G28000,AT2G33800,AT2G34420,AT2G37220,AT2G38040,AT2G39730,AT2G45180,AT3G01500,AT3G13470,AT3G15190,AT3G16000,AT3G18890,AT3G22520,AT3G26060,AT3G26650,AT3G27925,AT3G44890,AT3G46740,AT3G46780,AT3G50820…	GO:0009526
chloroplast	4.31968e-23	113	AT1G01080,AT1G03600,AT1G03630,AT1G04980,AT1G06690,AT1G06950,AT1G08450,AT1G09340,AT1G11860,AT1G12900,AT1G14410,AT1G15980,AT1G17220,AT1G20020,AT1G24360,AT1G24450,AT1G32060,AT1G32990,AT1G42970,AT1G48850,AT1G49750,AT1G54780,AT1G56070,AT1G67700,AT1G68260,AT1G69200,AT1G78060,AT2G01140,AT2G02740,AT2G04842,AT2G10940,AT2G21330,AT2G21660,AT2G22230,AT2G22360,AT2G24060,AT2G24280,AT2G25110,AT2G28000,AT2G32920…	GO:0009507
plastid stroma	5.80029e-22	56	AT1G01080,AT1G06690,AT1G09340,AT1G11860,AT1G12900,AT1G14410,AT1G17220,AT1G20020,AT1G24360,AT1G32060,AT1G32990,AT1G42970,AT1G48850,AT1G69200,AT2G01140,AT2G02740,AT2G04842,AT2G21330,AT2G28000,AT2G33800,AT2G34420,AT2G37220,AT2G38040,AT2G39730,AT3G01500,AT3G13470,AT3G15190,AT3G16000,AT3G18890,AT3G22520,AT3G26060,AT3G26650,AT3G44890,AT3G46780,AT3G50820,AT3G53460,AT3G57560,AT3G63140,AT4G10340,AT4G20360…	GO:0009532
chloroplast thylakoid membrane	1.66507e-21	44	AT1G01080,AT1G03600,AT1G03630,AT1G06690,AT1G15980,AT1G20020,AT1G32060,AT1G42970,AT1G54780,AT1G67700,AT2G10940,AT2G22360,AT2G33800,AT2G34420,AT2G37220,AT2G39730,AT2G45180,AT3G01500,AT3G16000,AT3G18890,AT3G26060,AT3G26650,AT3G27925,AT3G46780,AT3G50820,AT3G53460,AT4G01050,AT4G03280,AT4G04640,AT4G09010,AT4G10340,AT4G20360,AT4G21280,AT4G27440,AT4G35250,AT4G39960,AT5G17170,AT5G35630,AT5G50920,AT5G64040…	GO:0009535
plastid thylakoid membrane	1.82986e-21	44	AT1G01080,AT1G03600,AT1G03630,AT1G06690,AT1G15980,AT1G20020,AT1G32060,AT1G42970,AT1G54780,AT1G67700,AT2G10940,AT2G22360,AT2G33800,AT2G34420,AT2G37220,AT2G39730,AT2G45180,AT3G01500,AT3G16000,AT3G18890,AT3G26060,AT3G26650,AT3G27925,AT3G46780,AT3G50820,AT3G53460,AT4G01050,AT4G03280,AT4G04640,AT4G09010,AT4G10340,AT4G20360,AT4G21280,AT4G27440,AT4G35250,AT4G39960,AT5G17170,AT5G35630,AT5G50920,AT5G64040…	GO:0055035
chloroplast stroma	2.76819e-21	55	AT1G01080,AT1G06690,AT1G09340,AT1G11860,AT1G12900,AT1G14410,AT1G17220,AT1G20020,AT1G24360,AT1G32060,AT1G32990,AT1G42970,AT1G48850,AT1G69200,AT2G01140,AT2G02740,AT2G04842,AT2G21330,AT2G28000,AT2G33800,AT2G34420,AT2G37220,AT2G38040,AT2G39730,AT3G01500,AT3G13470,AT3G15190,AT3G18890,AT3G22520,AT3G26060,AT3G26650,AT3G44890,AT3G46780,AT3G50820,AT3G53460,AT3G57560,AT3G63140,AT4G10340,AT4G20360,AT4G21280…	GO:0009570
thylakoid membrane	6.7447e-21	44	AT1G01080,AT1G03600,AT1G03630,AT1G06690,AT1G15980,AT1G20020,AT1G32060,AT1G42970,AT1G54780,AT1G67700,AT2G10940,AT2G22360,AT2G33800,AT2G34420,AT2G37220,AT2G39730,AT2G45180,AT3G01500,AT3G16000,AT3G18890,AT3G26060,AT3G26650,AT3G27925,AT3G46780,AT3G50820,AT3G53460,AT4G01050,AT4G03280,AT4G04640,AT4G09010,AT4G10340,AT4G20360,AT4G21280,AT4G27440,AT4G35250,AT4G39960,AT5G17170,AT5G35630,AT5G50920,AT5G64040…	GO:0042651
photosynthetic membrane	8.08601e-21	44	AT1G01080,AT1G03600,AT1G03630,AT1G06690,AT1G15980,AT1G20020,AT1G32060,AT1G42970,AT1G54780,AT1G67700,AT2G10940,AT2G22360,AT2G33800,AT2G34420,AT2G37220,AT2G39730,AT2G45180,AT3G01500,AT3G16000,AT3G18890,AT3G26060,AT3G26650,AT3G27925,AT3G46780,AT3G50820,AT3G53460,AT4G01050,AT4G03280,AT4G04640,AT4G09010,AT4G10340,AT4G20360,AT4G21280,AT4G27440,AT4G35250,AT4G39960,AT5G17170,AT5G35630,AT5G50920,AT5G64040…	GO:0034357
cytosol	1.70667e-20	136	AT1G04170,AT1G04980,AT1G06220,AT1G09340,AT1G09760,AT1G11580,AT1G11860,AT1G12900,AT1G12920,AT1G20020,AT1G20580,AT1G20960,AT1G29250,AT1G32060,AT1G32990,AT1G42970,AT1G44835,AT1G48410,AT1G48850,AT1G48920,AT1G51510,AT1G56070,AT1G61730,AT1G67230,AT1G68560,AT1G72150,AT1G78830,AT1G78850,AT1G80410,AT2G01140,AT2G19520,AT2G21330,AT2G21660,AT2G27100,AT2G28000,AT2G33150,AT2G36460,AT2G38770,AT2G40290,AT2G42520…	GO:0005829
organelle envelope	2.21527e-18	71	AT1G01080,AT1G03600,AT1G03630,AT1G06690,AT1G06950,AT1G09340,AT1G10390,AT1G11860,AT1G12900,AT1G15980,AT1G17220,AT1G20020,AT1G24360,AT1G32060,AT1G32990,AT1G42970,AT1G54780,AT1G67230,AT1G67700,AT2G10940,AT2G21330,AT2G22360,AT2G28000,AT2G33800,AT2G34420,AT2G37220,AT2G38040,AT2G39730,AT2G45180,AT3G01500,AT3G13470,AT3G15190,AT3G16000,AT3G18890,AT3G22520,AT3G26060,AT3G26650,AT3G27925,AT3G44890,AT3G46740…	GO:0031967
envelope	2.21527e-18	71	AT1G01080,AT1G03600,AT1G03630,AT1G06690,AT1G06950,AT1G09340,AT1G10390,AT1G11860,AT1G12900,AT1G15980,AT1G17220,AT1G20020,AT1G24360,AT1G32060,AT1G32990,AT1G42970,AT1G54780,AT1G67230,AT1G67700,AT2G10940,AT2G21330,AT2G22360,AT2G28000,AT2G33800,AT2G34420,AT2G37220,AT2G38040,AT2G39730,AT2G45180,AT3G01500,AT3G13470,AT3G15190,AT3G16000,AT3G18890,AT3G22520,AT3G26060,AT3G26650,AT3G27925,AT3G44890,AT3G46740…	GO:0031975
plastid membrane	1.45026e-16	47	AT1G01080,AT1G03600,AT1G03630,AT1G06690,AT1G06950,AT1G15980,AT1G20020,AT1G32060,AT1G42970,AT1G54780,AT1G67700,AT2G10940,AT2G22360,AT2G33800,AT2G34420,AT2G37220,AT2G38040,AT2G39730,AT2G45180,AT3G01500,AT3G16000,AT3G18890,AT3G26060,AT3G26650,AT3G27925,AT3G46740,AT3G46780,AT3G50820,AT3G53460,AT4G01050,AT4G03280,AT4G04640,AT4G09010,AT4G10340,AT4G20360,AT4G21280,AT4G27440,AT4G35250,AT4G39960,AT5G17170…	GO:0042170
cytoplasm	2.06826e-16	213	AT1G01080,AT1G02140,AT1G03600,AT1G03630,AT1G04170,AT1G04510,AT1G04980,AT1G06220,AT1G06690,AT1G06950,AT1G06960,AT1G08450,AT1G09340,AT1G09760,AT1G10390,AT1G11580,AT1G11860,AT1G12900,AT1G12920,AT1G14410,AT1G15980,AT1G17220,AT1G20020,AT1G20580,AT1G20960,AT1G24360,AT1G24450,AT1G29250,AT1G32060,AT1G32990,AT1G41830,AT1G42970,AT1G44835,AT1G48410,AT1G48850,AT1G48920,AT1G49670,AT1G49750,AT1G51510,AT1G54780…	GO:0005737
intracellular anatomical structure	2.70473e-16	238	AT1G01080,AT1G02140,AT1G03600,AT1G03630,AT1G04170,AT1G04510,AT1G04980,AT1G06220,AT1G06230,AT1G06690,AT1G06950,AT1G06960,AT1G08450,AT1G09340,AT1G09760,AT1G09770,AT1G10390,AT1G11580,AT1G11860,AT1G12900,AT1G12920,AT1G14410,AT1G14650,AT1G15980,AT1G17220,AT1G20020,AT1G20580,AT1G20960,AT1G24360,AT1G24450,AT1G29250,AT1G32060,AT1G32990,AT1G33600,AT1G41830,AT1G42970,AT1G44835,AT1G48410,AT1G48610,AT1G48850…	GO:0005622
apoplast	3.0593e-16	40	AT1G09340,AT1G11860,AT1G12900,AT1G20020,AT1G32060,AT1G41830,AT1G42970,AT1G55210,AT1G68560,AT1G72150,AT1G78060,AT1G78820,AT1G78830,AT1G78850,AT2G10940,AT2G21330,AT2G28000,AT2G39730,AT3G01500,AT3G13750,AT3G13790,AT3G14310,AT3G15356,AT3G26650,AT3G52930,AT3G54400,AT3G63140,AT4G08950,AT4G20360,AT4G38970,AT4G39640,AT5G02500,AT5G09440,AT5G09660,AT5G17920,AT5G25980,AT5G35630,AT5G63800,AT5G66190,ATCG00490	GO:0048046
intracellular membrane-bounded organelle	3.61029e-16	221	AT1G01080,AT1G02140,AT1G03600,AT1G03630,AT1G04510,AT1G04980,AT1G06220,AT1G06230,AT1G06690,AT1G06950,AT1G06960,AT1G08450,AT1G09340,AT1G09760,AT1G09770,AT1G10390,AT1G11580,AT1G11860,AT1G12900,AT1G14410,AT1G14650,AT1G15980,AT1G17220,AT1G20020,AT1G20580,AT1G20960,AT1G24360,AT1G24450,AT1G29250,AT1G32060,AT1G32990,AT1G33600,AT1G41830,AT1G42970,AT1G48410,AT1G48610,AT1G48850,AT1G48920,AT1G49670,AT1G49750…	GO:0043231
chloroplast envelope	7.64025e-16	47	AT1G01080,AT1G03630,AT1G06690,AT1G06950,AT1G09340,AT1G11860,AT1G12900,AT1G17220,AT1G24360,AT1G32060,AT1G32990,AT1G42970,AT1G67700,AT2G21330,AT2G22360,AT2G28000,AT2G34420,AT2G37220,AT2G38040,AT2G39730,AT3G01500,AT3G13470,AT3G15190,AT3G18890,AT3G22520,AT3G26060,AT3G26650,AT3G44890,AT3G46740,AT3G46780,AT3G63140,AT4G01050,AT4G03280,AT4G04640,AT4G20360,AT4G27440,AT4G35000,AT4G38970,AT4G39960,AT5G09660…	GO:0009941
membrane-bounded organelle	1.07017e-15	221	AT1G01080,AT1G02140,AT1G03600,AT1G03630,AT1G04510,AT1G04980,AT1G06220,AT1G06230,AT1G06690,AT1G06950,AT1G06960,AT1G08450,AT1G09340,AT1G09760,AT1G09770,AT1G10390,AT1G11580,AT1G11860,AT1G12900,AT1G14410,AT1G14650,AT1G15980,AT1G17220,AT1G20020,AT1G20580,AT1G20960,AT1G24360,AT1G24450,AT1G29250,AT1G32060,AT1G32990,AT1G33600,AT1G41830,AT1G42970,AT1G48410,AT1G48610,AT1G48850,AT1G48920,AT1G49670,AT1G49750…	GO:0043227
nucleolus	3.31013e-15	39	AT1G02140,AT1G04510,AT1G04980,AT1G06960,AT1G09760,AT1G20580,AT1G20960,AT1G48850,AT1G48920,AT1G51510,AT1G56070,AT1G61730,AT1G77180,AT2G18510,AT2G19520,AT2G27100,AT2G33150,AT2G45640,AT2G47580,AT3G05060,AT3G13470,AT3G19760,AT3G44110,AT3G52930,AT3G58510,AT4G02840,AT4G10710,AT4G16143,AT4G20360,AT4G25210,AT5G02500,AT5G03740,AT5G04280,AT5G22650,AT5G44500,AT5G46070,AT5G59950,AT5G66680,AT5G67380	GO:0005730
spliceosomal complex	4.08084e-14	25	AT1G04510,AT1G06220,AT1G06960,AT1G09770,AT1G14650,AT1G20580,AT1G20960,AT1G77180,AT2G18510,AT2G18740,AT2G32600,AT2G33340,AT2G33730,AT2G38770,AT2G47580,AT3G18790,AT3G19760,AT3G26560,AT3G50670,AT4G02840,AT4G21660,AT5G06160,AT5G12190,AT5G44500,AT5G64270	GO:0005681
intracellular organelle	4.08231e-14	221	AT1G01080,AT1G02140,AT1G03600,AT1G03630,AT1G04510,AT1G04980,AT1G06220,AT1G06230,AT1G06690,AT1G06950,AT1G06960,AT1G08450,AT1G09340,AT1G09760,AT1G09770,AT1G10390,AT1G11580,AT1G11860,AT1G12900,AT1G14410,AT1G14650,AT1G15980,AT1G17220,AT1G20020,AT1G20580,AT1G20960,AT1G24360,AT1G24450,AT1G29250,AT1G32060,AT1G32990,AT1G33600,AT1G41830,AT1G42970,AT1G48410,AT1G48610,AT1G48850,AT1G48920,AT1G49670,AT1G49750…	GO:0043229
organelle	9.09733e-14	221	AT1G01080,AT1G02140,AT1G03600,AT1G03630,AT1G04510,AT1G04980,AT1G06220,AT1G06230,AT1G06690,AT1G06950,AT1G06960,AT1G08450,AT1G09340,AT1G09760,AT1G09770,AT1G10390,AT1G11580,AT1G11860,AT1G12900,AT1G14410,AT1G14650,AT1G15980,AT1G17220,AT1G20020,AT1G20580,AT1G20960,AT1G24360,AT1G24450,AT1G29250,AT1G32060,AT1G32990,AT1G33600,AT1G41830,AT1G42970,AT1G48410,AT1G48610,AT1G48850,AT1G48920,AT1G49670,AT1G49750…	GO:0043226
membrane-enclosed lumen	1.7211e-13	55	AT1G02140,AT1G04510,AT1G04980,AT1G06220,AT1G06960,AT1G08450,AT1G09760,AT1G20580,AT1G20960,AT1G48850,AT1G48920,AT1G51510,AT1G56070,AT1G61620,AT1G61730,AT1G67230,AT1G77180,AT2G18510,AT2G19520,AT2G27100,AT2G32920,AT2G33150,AT2G33800,AT2G45640,AT2G47580,AT3G05060,AT3G09260,AT3G13224,AT3G13470,AT3G16000,AT3G19760,AT3G28730,AT3G44110,AT3G50670,AT3G52930,AT3G57560,AT3G58510,AT4G02840,AT4G08350,AT4G10710…	GO:0031974
organelle lumen	1.7211e-13	55	AT1G02140,AT1G04510,AT1G04980,AT1G06220,AT1G06960,AT1G08450,AT1G09760,AT1G20580,AT1G20960,AT1G48850,AT1G48920,AT1G51510,AT1G56070,AT1G61620,AT1G61730,AT1G67230,AT1G77180,AT2G18510,AT2G19520,AT2G27100,AT2G32920,AT2G33150,AT2G33800,AT2G45640,AT2G47580,AT3G05060,AT3G09260,AT3G13224,AT3G13470,AT3G16000,AT3G19760,AT3G28730,AT3G44110,AT3G50670,AT3G52930,AT3G57560,AT3G58510,AT4G02840,AT4G08350,AT4G10710…	GO:0043233
intracellular organelle lumen	1.7211e-13	55	AT1G02140,AT1G04510,AT1G04980,AT1G06220,AT1G06960,AT1G08450,AT1G09760,AT1G20580,AT1G20960,AT1G48850,AT1G48920,AT1G51510,AT1G56070,AT1G61620,AT1G61730,AT1G67230,AT1G77180,AT2G18510,AT2G19520,AT2G27100,AT2G32920,AT2G33150,AT2G33800,AT2G45640,AT2G47580,AT3G05060,AT3G09260,AT3G13224,AT3G13470,AT3G16000,AT3G19760,AT3G28730,AT3G44110,AT3G50670,AT3G52930,AT3G57560,AT3G58510,AT4G02840,AT4G08350,AT4G10710…	GO:0070013
catalytic step 2 spliceosome	3.31264e-13	16	AT1G04510,AT1G06220,AT1G14650,AT1G20580,AT2G32600,AT2G33340,AT2G33730,AT2G38770,AT3G18790,AT3G19760,AT3G26560,AT4G02840,AT4G21660,AT5G12190,AT5G44500,AT5G64270	GO:0071013
nuclear lumen	1.30264e-12	48	AT1G02140,AT1G04510,AT1G04980,AT1G06220,AT1G06960,AT1G09760,AT1G20580,AT1G20960,AT1G48850,AT1G48920,AT1G51510,AT1G56070,AT1G61620,AT1G61730,AT1G67230,AT1G77180,AT2G18510,AT2G19520,AT2G27100,AT2G33150,AT2G45640,AT2G47580,AT3G05060,AT3G13224,AT3G13470,AT3G16000,AT3G19760,AT3G28730,AT3G44110,AT3G50670,AT3G52930,AT3G58510,AT4G02840,AT4G08350,AT4G10710,AT4G16143,AT4G20360,AT4G25210,AT5G02500,AT5G02530…	GO:0031981
cell wall	3.5921e-11	42	AT1G04980,AT1G06220,AT1G11580,AT1G28290,AT1G33600,AT1G41830,AT1G65590,AT1G65870,AT1G68560,AT1G78060,AT1G78820,AT1G78830,AT1G78850,AT2G01720,AT2G22230,AT2G33340,AT2G33530,AT2G39730,AT2G45220,AT2G47470,AT3G13750,AT3G13790,AT3G14310,AT3G15356,AT3G44110,AT3G52500,AT3G52930,AT3G54400,AT4G08950,AT4G13340,AT4G25900,AT4G30690,AT5G02500,AT5G22650,AT5G26830,AT5G28540,AT5G47500,AT5G50920,AT5G62300,AT5G63800…	GO:0005618
non-membrane-bounded organelle	3.86916e-11	65	AT1G02140,AT1G04510,AT1G04980,AT1G06960,AT1G09340,AT1G09760,AT1G11860,AT1G14410,AT1G20580,AT1G20960,AT1G32990,AT1G48850,AT1G48920,AT1G51510,AT1G56070,AT1G61730,AT1G67230,AT1G69200,AT1G77180,AT2G02740,AT2G18510,AT2G19520,AT2G21330,AT2G27100,AT2G28000,AT2G33150,AT2G33800,AT2G45640,AT2G47580,AT3G05060,AT3G13470,AT3G15190,AT3G16000,AT3G19760,AT3G28730,AT3G44110,AT3G44890,AT3G46780,AT3G52930,AT3G58510…	GO:0043228
intracellular non-membrane-bounded organelle	3.86916e-11	65	AT1G02140,AT1G04510,AT1G04980,AT1G06960,AT1G09340,AT1G09760,AT1G11860,AT1G14410,AT1G20580,AT1G20960,AT1G32990,AT1G48850,AT1G48920,AT1G51510,AT1G56070,AT1G61730,AT1G67230,AT1G69200,AT1G77180,AT2G02740,AT2G18510,AT2G19520,AT2G21330,AT2G27100,AT2G28000,AT2G33150,AT2G33800,AT2G45640,AT2G47580,AT3G05060,AT3G13470,AT3G15190,AT3G16000,AT3G19760,AT3G28730,AT3G44110,AT3G44890,AT3G46780,AT3G52930,AT3G58510…	GO:0043232
external encapsulating structure	7.73083e-11	42	AT1G04980,AT1G06220,AT1G11580,AT1G28290,AT1G33600,AT1G41830,AT1G65590,AT1G65870,AT1G68560,AT1G78060,AT1G78820,AT1G78830,AT1G78850,AT2G01720,AT2G22230,AT2G33340,AT2G33530,AT2G39730,AT2G45220,AT2G47470,AT3G13750,AT3G13790,AT3G14310,AT3G15356,AT3G44110,AT3G52500,AT3G52930,AT3G54400,AT4G08950,AT4G13340,AT4G25900,AT4G30690,AT5G02500,AT5G22650,AT5G26830,AT5G28540,AT5G47500,AT5G50920,AT5G62300,AT5G63800…	GO:0030312
stromule	2.45476e-10	11	AT1G09340,AT1G32060,AT1G42970,AT2G28000,AT2G37220,AT2G39730,AT3G01500,AT3G26650,AT3G63140,AT4G35090,ATCG00120	GO:0010319
ribonucleoprotein complex	6.8551e-10	38	AT1G04510,AT1G06220,AT1G06960,AT1G09770,AT1G14650,AT1G20580,AT1G20960,AT1G32990,AT1G56070,AT1G77180,AT2G18510,AT2G18740,AT2G32600,AT2G33340,AT2G33730,AT2G33800,AT2G38770,AT2G40290,AT2G47580,AT3G05060,AT3G15190,AT3G18790,AT3G19760,AT3G26560,AT3G44890,AT3G50670,AT3G55220,AT4G02840,AT4G21660,AT5G06160,AT5G12190,AT5G24490,AT5G30510,AT5G44500,AT5G60980,AT5G61780,AT5G62300,AT5G64270	GO:1990904
extracellular region	1.51473e-09	72	AT1G03600,AT1G03630,AT1G04170,AT1G04510,AT1G06220,AT1G06690,AT1G06950,AT1G08450,AT1G09340,AT1G09770,AT1G11580,AT1G11860,AT1G12900,AT1G12920,AT1G14410,AT1G20020,AT1G28290,AT1G32060,AT1G33811,AT1G41830,AT1G42970,AT1G55210,AT1G65870,AT1G67230,AT1G68560,AT1G72150,AT1G78060,AT1G78820,AT1G78830,AT1G78850,AT2G10940,AT2G21330,AT2G24280,AT2G28000,AT2G33530,AT2G39730,AT2G45180,AT2G45220,AT2G47470,AT3G01500…	GO:0005576
protein-containing complex	1.61067e-09	84	AT1G02140,AT1G03600,AT1G04170,AT1G04510,AT1G06220,AT1G06950,AT1G06960,AT1G09340,AT1G09770,AT1G10390,AT1G12920,AT1G14650,AT1G15980,AT1G20020,AT1G20580,AT1G20960,AT1G32990,AT1G51510,AT1G56070,AT1G69200,AT1G77180,AT1G80410,AT2G01720,AT2G18510,AT2G18740,AT2G19520,AT2G27100,AT2G32600,AT2G33340,AT2G33730,AT2G33800,AT2G34420,AT2G38040,AT2G38770,AT2G40290,AT2G42910,AT2G47580,AT3G05060,AT3G15190,AT3G18790…	GO:0032991
organelle subcompartment	1.65136e-09	57	AT1G01080,AT1G03600,AT1G03630,AT1G06690,AT1G08450,AT1G11860,AT1G15980,AT1G20020,AT1G32060,AT1G42970,AT1G54780,AT1G67700,AT2G01140,AT2G01720,AT2G10940,AT2G20990,AT2G21330,AT2G22230,AT2G22360,AT2G33800,AT2G34420,AT2G37220,AT2G39730,AT2G45180,AT3G01500,AT3G16000,AT3G18890,AT3G26060,AT3G26650,AT3G27925,AT3G46780,AT3G50820,AT3G53460,AT3G57560,AT3G63140,AT4G01050,AT4G01900,AT4G03280,AT4G04640,AT4G09010…	GO:0031984
plastoglobule	1.45353e-08	14	AT1G06690,AT1G09340,AT2G01140,AT2G21330,AT2G34420,AT2G39730,AT3G26060,AT3G50820,AT3G63140,AT4G10340,AT4G38970,ATCG00120,ATCG00350,ATCG00490	GO:0010287
spliceosomal snRNP complex	2.45671e-08	14	AT1G06220,AT1G06960,AT1G14650,AT1G20580,AT2G18740,AT2G32600,AT2G47580,AT3G50670,AT3G55220,AT4G02840,AT4G21660,AT5G12190,AT5G44500,AT5G64270	GO:0097525
U2 snRNP	2.8243e-08	11	AT1G06960,AT1G14650,AT1G20580,AT2G18740,AT2G32600,AT3G55220,AT4G02840,AT4G21660,AT5G12190,AT5G44500,AT5G64270	GO:0005686
small nuclear ribonucleoprotein complex	2.97312e-08	14	AT1G06220,AT1G06960,AT1G14650,AT1G20580,AT2G18740,AT2G32600,AT2G47580,AT3G50670,AT3G55220,AT4G02840,AT4G21660,AT5G12190,AT5G44500,AT5G64270	GO:0030532
Sm-like protein family complex	7.41684e-08	14	AT1G06220,AT1G06960,AT1G14650,AT1G20580,AT2G18740,AT2G32600,AT2G47580,AT3G50670,AT3G55220,AT4G02840,AT4G21660,AT5G12190,AT5G44500,AT5G64270	GO:0120114
nuclear protein-containing complex	2.42954e-07	37	AT1G02140,AT1G04510,AT1G06220,AT1G06960,AT1G09770,AT1G10390,AT1G14650,AT1G20580,AT1G20960,AT1G51510,AT1G77180,AT2G18510,AT2G18740,AT2G19520,AT2G32600,AT2G33340,AT2G33730,AT2G38770,AT2G47580,AT3G18790,AT3G19760,AT3G26560,AT3G28730,AT3G50670,AT3G55220,AT4G02840,AT4G08350,AT4G10710,AT4G21660,AT4G25210,AT4G25550,AT5G06160,AT5G12190,AT5G28540,AT5G44500,AT5G55670,AT5G64270	GO:0140513
U2-type spliceosomal complex	5.90979e-07	12	AT1G04510,AT1G06220,AT1G14650,AT1G20580,AT2G32600,AT2G33340,AT3G50670,AT4G02840,AT4G21660,AT5G12190,AT5G44500,AT5G64270	GO:0005684
thylakoid lumen	1.2255e-06	12	AT1G03600,AT1G54780,AT2G21330,AT3G26060,AT3G27925,AT3G50820,AT4G09010,AT4G11010,AT4G21280,AT5G64040,AT5G66190,ATCG00120	GO:0031977
chloroplast thylakoid membrane protein complex	3.22709e-06	8	AT1G20020,AT3G18890,AT4G01050,AT4G04640,AT4G10340,AT5G64040,AT5G66190,ATCG00120	GO:0098807
vacuole	1.49806e-05	40	AT1G09340,AT1G11580,AT1G24450,AT1G56070,AT1G72150,AT1G78850,AT2G01720,AT2G20990,AT2G21660,AT2G22230,AT2G22360,AT2G24060,AT2G24280,AT2G25110,AT2G32920,AT2G33150,AT2G33530,AT2G45960,AT2G47470,AT3G09260,AT3G12800,AT3G13750,AT3G19820,AT3G45780,AT3G46740,AT3G52930,AT4G02840,AT4G28520,AT4G35000,AT5G02500,AT5G09660,AT5G17920,AT5G22650,AT5G23210,AT5G25980,AT5G28540,AT5G44120,AT5G63400,AT5G63800,AT5G66680	GO:0005773
organelle membrane	5.65619e-05	69	AT1G01080,AT1G03600,AT1G03630,AT1G06690,AT1G06950,AT1G08450,AT1G10390,AT1G11580,AT1G15980,AT1G20020,AT1G32060,AT1G42970,AT1G54780,AT1G56070,AT1G67230,AT1G67700,AT1G78850,AT2G01720,AT2G10940,AT2G20990,AT2G22360,AT2G33150,AT2G33800,AT2G34420,AT2G37220,AT2G38040,AT2G39730,AT2G45180,AT2G47470,AT3G01500,AT3G12800,AT3G16000,AT3G18890,AT3G19820,AT3G26060,AT3G26650,AT3G27925,AT3G46740,AT3G46780,AT3G50820…	GO:0031090
cell-cell junction	9.16312e-05	37	AT1G09340,AT1G28290,AT1G41830,AT1G56070,AT1G68560,AT1G72150,AT1G78060,AT1G78830,AT1G80410,AT2G10940,AT2G20990,AT2G21660,AT2G33530,AT2G34040,AT2G36460,AT2G42910,AT2G45960,AT3G09260,AT3G11710,AT3G13750,AT3G26560,AT3G44110,AT3G52930,AT3G55220,AT3G62120,AT4G13340,AT4G16143,AT4G35000,AT4G39640,AT5G02500,AT5G09440,AT5G17920,AT5G22060,AT5G25980,AT5G28540,AT5G61780,AT5G66680	GO:0005911
plasmodesma	9.16312e-05	37	AT1G09340,AT1G28290,AT1G41830,AT1G56070,AT1G68560,AT1G72150,AT1G78060,AT1G78830,AT1G80410,AT2G10940,AT2G20990,AT2G21660,AT2G33530,AT2G34040,AT2G36460,AT2G42910,AT2G45960,AT3G09260,AT3G11710,AT3G13750,AT3G26560,AT3G44110,AT3G52930,AT3G55220,AT3G62120,AT4G13340,AT4G16143,AT4G35000,AT4G39640,AT5G02500,AT5G09440,AT5G17920,AT5G22060,AT5G25980,AT5G28540,AT5G61780,AT5G66680	GO:0009506
cell junction	9.16312e-05	37	AT1G09340,AT1G28290,AT1G41830,AT1G56070,AT1G68560,AT1G72150,AT1G78060,AT1G78830,AT1G80410,AT2G10940,AT2G20990,AT2G21660,AT2G33530,AT2G34040,AT2G36460,AT2G42910,AT2G45960,AT3G09260,AT3G11710,AT3G13750,AT3G26560,AT3G44110,AT3G52930,AT3G55220,AT3G62120,AT4G13340,AT4G16143,AT4G35000,AT4G39640,AT5G02500,AT5G09440,AT5G17920,AT5G22060,AT5G25980,AT5G28540,AT5G61780,AT5G66680	GO:0030054
anchoring junction	9.16312e-05	37	AT1G09340,AT1G28290,AT1G41830,AT1G56070,AT1G68560,AT1G72150,AT1G78060,AT1G78830,AT1G80410,AT2G10940,AT2G20990,AT2G21660,AT2G33530,AT2G34040,AT2G36460,AT2G42910,AT2G45960,AT3G09260,AT3G11710,AT3G13750,AT3G26560,AT3G44110,AT3G52930,AT3G55220,AT3G62120,AT4G13340,AT4G16143,AT4G35000,AT4G39640,AT5G02500,AT5G09440,AT5G17920,AT5G22060,AT5G25980,AT5G28540,AT5G61780,AT5G66680	GO:0070161
symplast	9.37029e-05	37	AT1G09340,AT1G28290,AT1G41830,AT1G56070,AT1G68560,AT1G72150,AT1G78060,AT1G78830,AT1G80410,AT2G10940,AT2G20990,AT2G21660,AT2G33530,AT2G34040,AT2G36460,AT2G42910,AT2G45960,AT3G09260,AT3G11710,AT3G13750,AT3G26560,AT3G44110,AT3G52930,AT3G55220,AT3G62120,AT4G13340,AT4G16143,AT4G35000,AT4G39640,AT5G02500,AT5G09440,AT5G17920,AT5G22060,AT5G25980,AT5G28540,AT5G61780,AT5G66680	GO:0055044
peroxisome	0.000469293	17	AT1G09340,AT1G24450,AT1G49670,AT2G21660,AT2G28000,AT2G33150,AT2G42520,AT3G09260,AT3G12800,AT3G58510,AT4G05530,AT4G16210,AT4G35000,AT4G35090,AT5G09660,AT5G17920,AT5G25980	GO:0005777
microbody	0.000469293	17	AT1G09340,AT1G24450,AT1G49670,AT2G21660,AT2G28000,AT2G33150,AT2G42520,AT3G09260,AT3G12800,AT3G58510,AT4G05530,AT4G16210,AT4G35000,AT4G35090,AT5G09660,AT5G17920,AT5G25980	GO:0042579
nuclear body	0.000477192	11	AT1G02140,AT1G06220,AT1G06960,AT1G09760,AT1G51510,AT1G61620,AT1G77180,AT2G27100,AT3G19760,AT3G50670,AT4G02840	GO:0016604
nuclear speck	0.00208223	9	AT1G02140,AT1G06220,AT1G51510,AT1G61620,AT1G77180,AT2G27100,AT3G19760,AT3G50670,AT4G02840	GO:0016607
U1 snRNP	0.00228217	6	AT1G20580,AT2G18740,AT2G47580,AT3G50670,AT4G02840,AT5G44500	GO:0005685
nucleoplasm	0.00554945	19	AT1G02140,AT1G06220,AT1G06960,AT1G09760,AT1G51510,AT1G61620,AT1G67230,AT1G77180,AT2G19520,AT2G27100,AT3G13224,AT3G19760,AT3G28730,AT3G50670,AT4G02840,AT4G08350,AT4G10710,AT5G02530,AT5G59950	GO:0005654
nucleus	0.00955078	118	AT1G01080,AT1G02140,AT1G04510,AT1G04980,AT1G06220,AT1G06230,AT1G06960,AT1G09760,AT1G09770,AT1G10390,AT1G14410,AT1G14650,AT1G15980,AT1G17220,AT1G20020,AT1G20580,AT1G20960,AT1G24360,AT1G24450,AT1G29250,AT1G32060,AT1G32990,AT1G33600,AT1G42970,AT1G48410,AT1G48610,AT1G48850,AT1G48920,AT1G49670,AT1G49750,AT1G51510,AT1G54780,AT1G56070,AT1G61620,AT1G61730,AT1G65590,AT1G67230,AT1G72150,AT1G77180,AT1G80410…	GO:0005634
mitochondrion	0.0103304	50	AT1G11860,AT1G24360,AT1G48920,AT1G49670,AT1G67230,AT1G67700,AT1G68260,AT1G68560,AT1G72150,AT1G77180,AT1G78060,AT1G78830,AT1G78850,AT1G80410,AT2G01140,AT2G01720,AT2G02740,AT2G04842,AT2G10940,AT2G19520,AT2G21330,AT2G28000,AT2G33150,AT2G33800,AT2G36460,AT2G39800,AT3G02760,AT3G13470,AT3G26560,AT3G44890,AT3G46740,AT3G52930,AT3G57560,AT4G01130,AT4G04640,AT4G10750,AT4G11010,AT4G16210,AT4G20360,AT4G34200…	GO:0005739
ribosome	0.0151707	19	AT1G09340,AT1G11860,AT1G32990,AT2G21330,AT2G28000,AT2G33800,AT3G13470,AT3G15190,AT3G44890,AT3G63140,AT4G08350,AT4G35090,AT5G02500,AT5G24490,AT5G25980,AT5G30510,AT5G35630,AT5G62300,ATCG00490	GO:0005840
eukaryotic translation initiation factor 2 complex	0.0188526	3	AT1G04170,AT2G40290,AT5G20920	GO:0005850
plant-type cell wall	0.0209505	26	AT1G04980,AT1G06220,AT1G28290,AT1G68560,AT1G78060,AT1G78830,AT2G01720,AT2G22230,AT2G33340,AT2G33530,AT2G39730,AT2G47470,AT3G13750,AT3G44110,AT3G52500,AT3G52930,AT4G08950,AT4G13340,AT5G02500,AT5G22650,AT5G26830,AT5G28540,AT5G50920,AT5G62300,AT5G66680,ATCG00490	GO:0009505
Prp19 complex	0.0218576	4	AT1G04510,AT1G09770,AT2G33340,AT3G18790	GO:0000974
photosystem	0.029353	8	AT1G03600,AT2G34420,AT3G50820,AT4G10340,AT4G21280,AT4G35250,AT5G64040,ATCG00350	GO:0009521
plastid nucleoid	0.0470215	6	AT1G14410,AT1G69200,AT2G02740,AT3G16000,AT3G46780,AT4G20360	GO:0042646
His6-Strep-Csy4* all negative
GO MF	p-value	number	AGIs	GO
mRNA binding	1.0109e-13	35	AT1G03130,AT1G05190,AT1G10200,AT1G13690,AT1G15820,AT1G27090,AT1G31330,AT1G33140,AT1G44575,AT1G61520,AT1G67090,AT3G08580,AT3G08940,AT3G11940,AT3G12780,AT3G13920,AT3G52590,AT3G56940,AT3G61240,AT4G01310,AT4G12800,AT4G25630,AT4G35100,AT4G37930,AT5G25610,AT5G27120,AT5G60390,ATCG00020,ATCG00270,ATCG00280,ATCG00470,ATCG00480,ATCG00540,ATCG00680,ATCG00800	GO:0003729
RNA binding	1.31009e-08	39	AT1G03130,AT1G05190,AT1G10200,AT1G13690,AT1G15820,AT1G27090,AT1G31330,AT1G33140,AT1G44575,AT1G56110,AT1G61520,AT1G67090,AT3G01540,AT3G08580,AT3G08940,AT3G11940,AT3G12780,AT3G13920,AT3G52590,AT3G56940,AT3G61240,AT4G01310,AT4G12800,AT4G25630,AT4G35100,AT4G37930,AT5G03940,AT5G25610,AT5G27120,AT5G27640,AT5G60390,ATCG00020,ATCG00270,ATCG00280,ATCG00470,ATCG00480,ATCG00540,ATCG00680,ATCG00800	GO:0003723
chlorophyll binding	6.22086e-08	8	AT1G15820,AT1G44575,AT1G61520,AT3G08940,ATCG00020,ATCG00270,ATCG00280,ATCG00680	GO:0016168
electron transporter, transferring electrons within the cyclic electron transport pathway of photosynthesis activity	0.00122607	4	ATCG00020,ATCG00270,ATCG00280,ATCG00680	GO:0045156
protein domain specific binding	0.00531629	6	AT1G03130,AT1G31330,AT1G44575,AT1G61520,AT4G12800,AT5G03940	GO:0019904
nucleic acid binding	0.0302104	49	AT1G03130,AT1G05190,AT1G10200,AT1G13440,AT1G13690,AT1G15820,AT1G27090,AT1G31330,AT1G33140,AT1G44575,AT1G48620,AT1G52740,AT1G56110,AT1G61520,AT1G67090,AT2G27170,AT2G30620,AT3G01540,AT3G08580,AT3G08940,AT3G11940,AT3G12780,AT3G13920,AT3G18035,AT3G18990,AT3G52590,AT3G56940,AT3G61240,AT4G01310,AT4G12800,AT4G25630,AT4G35100,AT4G37930,AT5G03940,AT5G22880,AT5G25610,AT5G27120,AT5G27640,AT5G59970,AT5G60390…	GO:0003676
GO BP	p-value	number	AGIs	GO
photosynthesis	7.59649e-12	19	AT1G03130,AT1G15820,AT1G22700,AT1G31330,AT1G44575,AT1G61520,AT1G67090,AT1G68830,AT1G74470,AT3G08940,AT3G12780,AT3G56940,AT4G12800,AT5G01920,ATCG00020,ATCG00270,ATCG00280,ATCG00540,ATCG00680	GO:0015979
photosynthesis, light reaction	4.69891e-06	11	AT1G15820,AT1G22700,AT1G61520,AT1G68830,AT3G08940,AT5G01920,ATCG00020,ATCG00270,ATCG00280,ATCG00540,ATCG00680	GO:0019684
protein-chromophore linkage	0.000157152	7	AT1G15820,AT1G61520,AT3G08940,ATCG00020,ATCG00270,ATCG00280,ATCG00680	GO:0018298
generation of precursor metabolites and energy	0.000281957	16	AT1G13440,AT1G15820,AT1G22700,AT1G61520,AT1G68830,AT3G08940,AT3G12780,AT5G01920,ATCG00020,ATCG00130,ATCG00270,ATCG00280,ATCG00470,ATCG00480,ATCG00540,ATCG00680	GO:0006091
photosynthetic electron transport in photosystem II	0.00086257	4	ATCG00020,ATCG00270,ATCG00280,ATCG00680	GO:0009772
GO CC	p-value	number	AGIs	GO
thylakoid	1.73729e-18	32	AT1G03130,AT1G15820,AT1G21500,AT1G22700,AT1G29670,AT1G31330,AT1G44575,AT1G61520,AT1G67090,AT1G68830,AT1G74470,AT2G38540,AT3G08940,AT3G12345,AT3G12780,AT3G14110,AT3G56940,AT4G12800,AT4G37930,AT5G01920,AT5G08540,AT5G23060,AT5G58250,AT5G59970,ATCG00020,ATCG00130,ATCG00270,ATCG00280,ATCG00470,ATCG00480,ATCG00540,ATCG00680	GO:0009579
chloroplast thylakoid	7.9214e-17	29	AT1G03130,AT1G15820,AT1G21500,AT1G22700,AT1G29670,AT1G31330,AT1G44575,AT1G61520,AT1G67090,AT1G68830,AT1G74470,AT2G38540,AT3G08940,AT3G12345,AT3G14110,AT3G56940,AT4G12800,AT4G37930,AT5G01920,AT5G08540,AT5G23060,ATCG00020,ATCG00130,ATCG00270,ATCG00280,ATCG00470,ATCG00480,ATCG00540,ATCG00680	GO:0009534
plastid thylakoid	8.36224e-17	29	AT1G03130,AT1G15820,AT1G21500,AT1G22700,AT1G29670,AT1G31330,AT1G44575,AT1G61520,AT1G67090,AT1G68830,AT1G74470,AT2G38540,AT3G08940,AT3G12345,AT3G14110,AT3G56940,AT4G12800,AT4G37930,AT5G01920,AT5G08540,AT5G23060,ATCG00020,ATCG00130,ATCG00270,ATCG00280,ATCG00470,ATCG00480,ATCG00540,ATCG00680	GO:0031976
chloroplast thylakoid membrane	1.98372e-14	24	AT1G03130,AT1G15820,AT1G22700,AT1G31330,AT1G44575,AT1G61520,AT1G67090,AT1G68830,AT1G74470,AT3G08940,AT3G12345,AT3G14110,AT3G56940,AT4G12800,AT5G08540,AT5G23060,ATCG00020,ATCG00130,ATCG00270,ATCG00280,ATCG00470,ATCG00480,ATCG00540,ATCG00680	GO:0009535
plastid thylakoid membrane	2.09895e-14	24	AT1G03130,AT1G15820,AT1G22700,AT1G31330,AT1G44575,AT1G61520,AT1G67090,AT1G68830,AT1G74470,AT3G08940,AT3G12345,AT3G14110,AT3G56940,AT4G12800,AT5G08540,AT5G23060,ATCG00020,ATCG00130,ATCG00270,ATCG00280,ATCG00470,ATCG00480,ATCG00540,ATCG00680	GO:0055035
plastid envelope	2.7774e-14	35	AT1G03130,AT1G05190,AT1G08640,AT1G15820,AT1G22700,AT1G31330,AT1G33140,AT1G44575,AT1G61520,AT1G67090,AT1G68830,AT1G74470,AT1G77590,AT3G08580,AT3G08940,AT3G12345,AT3G12780,AT3G14110,AT3G51140,AT3G56940,AT4G01310,AT4G12800,AT4G33350,AT4G37930,AT5G08540,AT5G23060,ATCG00020,ATCG00130,ATCG00270,ATCG00280,ATCG00470,ATCG00480,ATCG00540,ATCG00680,ATCG00800	GO:0009526
thylakoid membrane	4.60626e-14	24	AT1G03130,AT1G15820,AT1G22700,AT1G31330,AT1G44575,AT1G61520,AT1G67090,AT1G68830,AT1G74470,AT3G08940,AT3G12345,AT3G14110,AT3G56940,AT4G12800,AT5G08540,AT5G23060,ATCG00020,ATCG00130,ATCG00270,ATCG00280,ATCG00470,ATCG00480,ATCG00540,ATCG00680	GO:0042651
photosynthetic membrane	5.13732e-14	24	AT1G03130,AT1G15820,AT1G22700,AT1G31330,AT1G44575,AT1G61520,AT1G67090,AT1G68830,AT1G74470,AT3G08940,AT3G12345,AT3G14110,AT3G56940,AT4G12800,AT5G08540,AT5G23060,ATCG00020,ATCG00130,ATCG00270,ATCG00280,ATCG00470,ATCG00480,ATCG00540,ATCG00680	GO:0034357
plastid	4.26426e-13	66	AT1G01610,AT1G03130,AT1G05190,AT1G08640,AT1G13440,AT1G15820,AT1G16030,AT1G18060,AT1G21500,AT1G22410,AT1G22700,AT1G27090,AT1G29670,AT1G31330,AT1G33140,AT1G44575,AT1G55160,AT1G61520,AT1G67090,AT1G68830,AT1G74470,AT1G77590,AT2G31810,AT2G38540,AT2G45740,AT3G08580,AT3G08940,AT3G12345,AT3G12780,AT3G14110,AT3G15730,AT3G18080,AT3G51140,AT3G56940,AT4G01310,AT4G12800,AT4G33350,AT4G34450,AT4G37930,AT5G01920…	GO:0009536
cell wall	5.91906e-13	38	AT1G03230,AT1G09560,AT1G13440,AT1G16030,AT1G29670,AT1G33590,AT1G56110,AT1G72610,AT1G75750,AT2G05920,AT2G06850,AT2G38540,AT3G05910,AT3G08580,AT3G11940,AT3G12780,AT3G13920,AT3G18080,AT3G20820,AT3G49120,AT3G55430,AT3G61820,AT4G19410,AT4G21150,AT4G23820,AT4G29010,AT5G03350,AT5G06860,AT5G06870,AT5G07030,AT5G19780,AT5G20630,AT5G20950,AT5G25460,AT5G49360,AT5G52640,AT5G64260,ATCG00480	GO:0005618
external encapsulating structure	1.10913e-12	38	AT1G03230,AT1G09560,AT1G13440,AT1G16030,AT1G29670,AT1G33590,AT1G56110,AT1G72610,AT1G75750,AT2G05920,AT2G06850,AT2G38540,AT3G05910,AT3G08580,AT3G11940,AT3G12780,AT3G13920,AT3G18080,AT3G20820,AT3G49120,AT3G55430,AT3G61820,AT4G19410,AT4G21150,AT4G23820,AT4G29010,AT5G03350,AT5G06860,AT5G06870,AT5G07030,AT5G19780,AT5G20630,AT5G20950,AT5G25460,AT5G49360,AT5G52640,AT5G64260,ATCG00480	GO:0030312
chloroplast	1.77277e-12	58	AT1G01610,AT1G03130,AT1G05190,AT1G08640,AT1G13440,AT1G15820,AT1G16030,AT1G18060,AT1G21500,AT1G22410,AT1G22700,AT1G27090,AT1G29670,AT1G31330,AT1G33140,AT1G44575,AT1G55160,AT1G61520,AT1G67090,AT1G68830,AT1G74470,AT1G77590,AT2G31810,AT2G38540,AT2G45740,AT3G08580,AT3G08940,AT3G12345,AT3G12780,AT3G14110,AT3G15730,AT3G18080,AT3G51140,AT3G56940,AT4G01310,AT4G12800,AT4G33350,AT4G34450,AT4G37930,AT5G01920…	GO:0009507
organelle envelope	6.17779e-10	36	AT1G03130,AT1G05190,AT1G08640,AT1G15820,AT1G22700,AT1G31330,AT1G33140,AT1G44575,AT1G61520,AT1G67090,AT1G68830,AT1G74470,AT1G77590,AT3G08580,AT3G08940,AT3G12345,AT3G12780,AT3G14110,AT3G15730,AT3G51140,AT3G56940,AT4G01310,AT4G12800,AT4G33350,AT4G37930,AT5G08540,AT5G23060,ATCG00020,ATCG00130,ATCG00270,ATCG00280,ATCG00470,ATCG00480,ATCG00540,ATCG00680,ATCG00800	GO:0031967
envelope	6.17779e-10	36	AT1G03130,AT1G05190,AT1G08640,AT1G15820,AT1G22700,AT1G31330,AT1G33140,AT1G44575,AT1G61520,AT1G67090,AT1G68830,AT1G74470,AT1G77590,AT3G08580,AT3G08940,AT3G12345,AT3G12780,AT3G14110,AT3G15730,AT3G51140,AT3G56940,AT4G01310,AT4G12800,AT4G33350,AT4G37930,AT5G08540,AT5G23060,ATCG00020,ATCG00130,ATCG00270,ATCG00280,ATCG00470,ATCG00480,ATCG00540,ATCG00680,ATCG00800	GO:0031975
plastid membrane	6.29472e-10	26	AT1G03130,AT1G08640,AT1G15820,AT1G22700,AT1G31330,AT1G44575,AT1G61520,AT1G67090,AT1G68830,AT1G74470,AT3G08940,AT3G12345,AT3G14110,AT3G51140,AT3G56940,AT4G12800,AT5G08540,AT5G23060,ATCG00020,ATCG00130,ATCG00270,ATCG00280,ATCG00470,ATCG00480,ATCG00540,ATCG00680	GO:0042170
photosystem	1.63669e-08	11	AT1G03130,AT1G15820,AT1G31330,AT1G44575,AT1G61520,AT3G08940,AT4G12800,ATCG00020,ATCG00270,ATCG00280,ATCG00680	GO:0009521
organelle subcompartment	8.85054e-08	32	AT1G03130,AT1G15820,AT1G21500,AT1G22700,AT1G29670,AT1G31330,AT1G44575,AT1G61520,AT1G67090,AT1G68830,AT1G74470,AT2G38540,AT3G08940,AT3G12345,AT3G14110,AT3G56940,AT4G12800,AT4G21150,AT4G37930,AT5G01920,AT5G08540,AT5G11560,AT5G23060,AT5G25610,ATCG00020,ATCG00130,ATCG00270,ATCG00280,ATCG00470,ATCG00480,ATCG00540,ATCG00680	GO:0031984
plant-type cell wall	7.70102e-07	27	AT1G13440,AT1G16030,AT1G33590,AT1G56110,AT1G75750,AT2G06850,AT2G38540,AT3G05910,AT3G08580,AT3G11940,AT3G12780,AT3G13920,AT3G18080,AT3G49120,AT3G61820,AT4G19410,AT4G21150,AT4G29010,AT5G06860,AT5G06870,AT5G19780,AT5G20950,AT5G25460,AT5G49360,AT5G52640,AT5G64260,ATCG00480	GO:0009505
plastoglobule	1.0255e-06	9	AT1G31330,AT1G61520,AT3G08940,AT4G12800,ATCG00020,ATCG00270,ATCG00280,ATCG00480,ATCG00680	GO:0010287
cell-cell junction	1.19748e-06	29	AT1G09560,AT1G13440,AT1G33140,AT1G56110,AT2G05920,AT2G06850,AT2G27170,AT2G41475,AT3G11940,AT3G13920,AT3G15730,AT3G20820,AT3G55430,AT3G61820,AT4G19410,AT4G21150,AT4G22010,AT4G29010,AT4G34450,AT4G35100,AT5G06860,AT5G06870,AT5G19780,AT5G20950,AT5G25460,AT5G27120,AT5G59970,AT5G60390,AT5G64260	GO:0005911
plasmodesma	1.19748e-06	29	AT1G09560,AT1G13440,AT1G33140,AT1G56110,AT2G05920,AT2G06850,AT2G27170,AT2G41475,AT3G11940,AT3G13920,AT3G15730,AT3G20820,AT3G55430,AT3G61820,AT4G19410,AT4G21150,AT4G22010,AT4G29010,AT4G34450,AT4G35100,AT5G06860,AT5G06870,AT5G19780,AT5G20950,AT5G25460,AT5G27120,AT5G59970,AT5G60390,AT5G64260	GO:0009506
cell junction	1.19748e-06	29	AT1G09560,AT1G13440,AT1G33140,AT1G56110,AT2G05920,AT2G06850,AT2G27170,AT2G41475,AT3G11940,AT3G13920,AT3G15730,AT3G20820,AT3G55430,AT3G61820,AT4G19410,AT4G21150,AT4G22010,AT4G29010,AT4G34450,AT4G35100,AT5G06860,AT5G06870,AT5G19780,AT5G20950,AT5G25460,AT5G27120,AT5G59970,AT5G60390,AT5G64260	GO:0030054
anchoring junction	1.19748e-06	29	AT1G09560,AT1G13440,AT1G33140,AT1G56110,AT2G05920,AT2G06850,AT2G27170,AT2G41475,AT3G11940,AT3G13920,AT3G15730,AT3G20820,AT3G55430,AT3G61820,AT4G19410,AT4G21150,AT4G22010,AT4G29010,AT4G34450,AT4G35100,AT5G06860,AT5G06870,AT5G19780,AT5G20950,AT5G25460,AT5G27120,AT5G59970,AT5G60390,AT5G64260	GO:0070161
symplast	1.22031e-06	29	AT1G09560,AT1G13440,AT1G33140,AT1G56110,AT2G05920,AT2G06850,AT2G27170,AT2G41475,AT3G11940,AT3G13920,AT3G15730,AT3G20820,AT3G55430,AT3G61820,AT4G19410,AT4G21150,AT4G22010,AT4G29010,AT4G34450,AT4G35100,AT5G06860,AT5G06870,AT5G19780,AT5G20950,AT5G25460,AT5G27120,AT5G59970,AT5G60390,AT5G64260	GO:0055044
extracellular region	1.83384e-05	44	AT1G03130,AT1G03230,AT1G05190,AT1G08640,AT1G09560,AT1G13440,AT1G13690,AT1G29670,AT1G67090,AT1G72610,AT1G72970,AT1G75750,AT2G05920,AT2G06850,AT2G38540,AT2G41475,AT3G02110,AT3G05910,AT3G12780,AT3G18080,AT3G20820,AT3G49120,AT3G55430,AT3G61820,AT4G19410,AT4G21650,AT4G22010,AT4G24780,AT4G27160,AT4G34980,AT4G37930,AT5G03350,AT5G06860,AT5G06870,AT5G07030,AT5G20630,AT5G20950,AT5G25460,AT5G25610,AT5G49360…	GO:0005576
cytoplasm	2.66108e-05	103	AT1G01610,AT1G03130,AT1G03230,AT1G05190,AT1G08640,AT1G10200,AT1G13440,AT1G15820,AT1G16030,AT1G18060,AT1G21500,AT1G22410,AT1G22700,AT1G27090,AT1G29670,AT1G31330,AT1G33140,AT1G33590,AT1G44575,AT1G52740,AT1G55160,AT1G56110,AT1G60550,AT1G61520,AT1G67090,AT1G68830,AT1G72610,AT1G74470,AT1G75750,AT1G77590,AT2G05920,AT2G06850,AT2G16860,AT2G27170,AT2G30620,AT2G31810,AT2G38540,AT2G45740,AT3G01540,AT3G02110…	GO:0005737
chloroplast envelope	5.328e-05	21	AT1G03130,AT1G05190,AT1G08640,AT1G15820,AT1G31330,AT1G33140,AT1G67090,AT1G74470,AT1G77590,AT3G08580,AT3G08940,AT3G12780,AT3G14110,AT3G51140,AT3G56940,AT4G01310,AT4G12800,AT4G33350,AT5G08540,ATCG00470,ATCG00800	GO:0009941
membrane protein complex	6.3593e-05	17	AT1G03130,AT1G15820,AT1G31330,AT1G44575,AT1G61520,AT3G08940,AT4G12800,AT4G21150,AT4G34450,AT5G11560,ATCG00020,ATCG00130,ATCG00270,ATCG00280,ATCG00470,ATCG00480,ATCG00680	GO:0098796
nucleosome	0.000100501	7	AT1G48620,AT1G52740,AT2G30620,AT3G18035,AT5G22880,AT5G59970,AT5G65360	GO:0000786
DNA packaging complex	0.000191997	7	AT1G48620,AT1G52740,AT2G30620,AT3G18035,AT5G22880,AT5G59970,AT5G65360	GO:0044815
photosystem I	0.000234202	6	AT1G03130,AT1G15820,AT1G31330,AT1G61520,AT3G08940,AT4G12800	GO:0009522
photosystem II	0.000258888	7	AT1G15820,AT1G44575,AT3G08940,ATCG00020,ATCG00270,ATCG00280,ATCG00680	GO:0009523
apoplast	0.000446168	16	AT1G09560,AT1G29670,AT1G67090,AT1G72610,AT2G06850,AT2G38540,AT3G12780,AT3G20820,AT3G49120,AT4G37930,AT5G03350,AT5G20630,AT5G20950,AT5G49360,AT5G51750,AT5G64260	GO:0048046
protein-containing complex	0.000597443	41	AT1G03130,AT1G03140,AT1G15820,AT1G31330,AT1G33140,AT1G44575,AT1G48620,AT1G52740,AT1G56110,AT1G61520,AT2G16860,AT2G27170,AT2G30620,AT3G01540,AT3G08940,AT3G11940,AT3G14110,AT3G18035,AT3G52590,AT4G12800,AT4G21150,AT4G25630,AT4G34450,AT5G03940,AT5G11560,AT5G19780,AT5G22880,AT5G27120,AT5G27640,AT5G52640,AT5G59970,AT5G65360,ATCG00020,ATCG00130,ATCG00270,ATCG00280,ATCG00470,ATCG00480,ATCG00540,ATCG00680…	GO:0032991
protein-DNA complex	0.00348992	7	AT1G48620,AT1G52740,AT2G30620,AT3G18035,AT5G22880,AT5G59970,AT5G65360	GO:0032993
non-membrane-bounded organelle	0.00504947	29	AT1G05190,AT1G10200,AT1G13440,AT1G33140,AT1G48620,AT1G52740,AT1G56110,AT1G67090,AT2G27170,AT2G30620,AT3G01540,AT3G07170,AT3G08580,AT3G11940,AT3G13920,AT3G18035,AT3G18080,AT3G18780,AT3G52590,AT3G61240,AT4G01310,AT4G25630,AT4G37930,AT5G19780,AT5G22880,AT5G27120,AT5G59970,AT5G65360,ATCG00800	GO:0043228
intracellular non-membrane-bounded organelle	0.00504947	29	AT1G05190,AT1G10200,AT1G13440,AT1G33140,AT1G48620,AT1G52740,AT1G56110,AT1G67090,AT2G27170,AT2G30620,AT3G01540,AT3G07170,AT3G08580,AT3G11940,AT3G13920,AT3G18035,AT3G18080,AT3G18780,AT3G52590,AT3G61240,AT4G01310,AT4G25630,AT4G37930,AT5G19780,AT5G22880,AT5G27120,AT5G59970,AT5G65360,ATCG00800	GO:0043232
chloroplast stroma	0.00706309	16	AT1G05190,AT1G31330,AT1G61520,AT1G67090,AT3G08940,AT3G12780,AT4G01310,AT4G12800,AT4G37930,AT5G03940,ATCG00020,ATCG00270,ATCG00280,ATCG00480,ATCG00680,ATCG00800	GO:0009570
cell periphery	0.00793122	53	AT1G03230,AT1G09560,AT1G10200,AT1G13440,AT1G16030,AT1G29670,AT1G33140,AT1G33590,AT1G56110,AT1G72610,AT1G75750,AT2G05920,AT2G06850,AT2G38540,AT3G05910,AT3G08580,AT3G11940,AT3G12780,AT3G13920,AT3G14110,AT3G15730,AT3G18080,AT3G20820,AT3G49120,AT3G55430,AT3G61820,AT4G19410,AT4G21150,AT4G23820,AT4G29010,AT4G33350,AT4G34450,AT4G34980,AT4G35100,AT4G37930,AT5G03350,AT5G03940,AT5G06860,AT5G06870,AT5G07030…	GO:0071944
chromatin	0.00794724	8	AT1G48620,AT1G52740,AT2G27170,AT2G30620,AT3G18035,AT5G22880,AT5G59970,AT5G65360	GO:0000785
plastid stroma	0.00795953	16	AT1G05190,AT1G31330,AT1G61520,AT1G67090,AT3G08940,AT3G12780,AT4G01310,AT4G12800,AT4G37930,AT5G03940,ATCG00020,ATCG00270,ATCG00280,ATCG00480,ATCG00680,ATCG00800	GO:0009532
photosystem I reaction center	0.0119578	3	AT1G03130,AT1G31330,AT4G12800	GO:0009538
organelle membrane	0.03211	35	AT1G03130,AT1G08640,AT1G15820,AT1G22700,AT1G31330,AT1G33140,AT1G44575,AT1G61520,AT1G67090,AT1G68830,AT1G74470,AT2G45740,AT3G08580,AT3G08940,AT3G12345,AT3G14110,AT3G15730,AT3G49120,AT3G51140,AT3G56940,AT4G12800,AT4G21150,AT4G34450,AT5G08540,AT5G11560,AT5G23060,AT5G59970,ATCG00020,ATCG00130,ATCG00270,ATCG00280,ATCG00470,ATCG00480,ATCG00540,ATCG00680	GO:0031090

## Sheet: GO His6-Myc-Csy4
His6-Myc-Csy4* significantly enriched
GO MF	p-value	number	AGIs	GO
RNA binding	2.30545e-08	26	AT1G04170,AT1G09760,AT1G20580,AT1G24450,AT1G48160,AT1G48350,AT1G75350,AT2G33800,AT2G35410,AT2G47580,AT3G07810,AT3G15190,AT3G16230,AT3G23700,AT3G27850,AT3G49430,AT4G02840,AT4G09040,AT4G26370,AT4G34110,AT4G38020,AT5G14320,AT5G14460,AT5G40490,AT5G44500,AT5G60390	GO:0003723
GO BP	p-value	number	AGIs	GO
mRNA splicing, via spliceosome	0.00172556	9	AT1G09760,AT1G20580,AT2G47580,AT3G18790,AT3G49430,AT3G62840,AT4G02840,AT4G21660,AT5G44500	GO:0000398
ribonucleoprotein complex assembly	0.00325131	7	AT1G04170,AT1G20580,AT3G18790,AT3G62840,AT4G02840,AT5G22330,AT5G67630	GO:0022618
ribonucleoprotein complex subunit organization	0.00372702	7	AT1G04170,AT1G20580,AT3G18790,AT3G62840,AT4G02840,AT5G22330,AT5G67630	GO:0071826
RNA splicing, via transesterification reactions	0.00423959	9	AT1G09760,AT1G20580,AT2G47580,AT3G18790,AT3G49430,AT3G62840,AT4G02840,AT4G21660,AT5G44500	GO:0000375
RNA splicing, via transesterification reactions with bulged adenosine as nucleophile	0.00423959	9	AT1G09760,AT1G20580,AT2G47580,AT3G18790,AT3G49430,AT3G62840,AT4G02840,AT4G21660,AT5G44500	GO:0000377
cellular nitrogen compound metabolic process	0.00442213	36	AT1G04170,AT1G09760,AT1G20580,AT1G24450,AT1G48350,AT1G75350,AT2G19480,AT2G33800,AT2G38040,AT2G38280,AT2G39670,AT2G45640,AT2G47580,AT3G15190,AT3G16230,AT3G18790,AT3G23700,AT3G27850,AT3G49430,AT3G54090,AT3G62840,AT4G02840,AT4G21660,AT4G24350,AT4G26110,AT4G26370,AT4G34110,AT4G38020,AT4G39640,AT5G14320,AT5G14460,AT5G22330,AT5G40490,AT5G44500,AT5G60390,AT5G67630	GO:0034641
RNA processing	0.0179011	16	AT1G09760,AT1G20580,AT1G24450,AT2G33800,AT2G39670,AT2G47580,AT3G18790,AT3G23700,AT3G49430,AT3G62840,AT4G02840,AT4G21660,AT4G38020,AT5G14460,AT5G40490,AT5G44500	GO:0006396
protein-containing complex organization	0.0304565	11	AT1G04170,AT1G20580,AT1G48160,AT2G19480,AT3G18790,AT3G62840,AT4G02840,AT4G26110,AT4G26370,AT5G22330,AT5G67630	GO:0043933
RNA splicing	0.0373407	9	AT1G09760,AT1G20580,AT2G47580,AT3G18790,AT3G49430,AT3G62840,AT4G02840,AT4G21660,AT5G44500	GO:0008380
GO CC	p-value	number	AGIs	GO
ribonucleoprotein complex	4.19232e-06	17	AT1G20580,AT1G48160,AT2G33800,AT2G35410,AT2G43770,AT2G47580,AT3G15190,AT3G18790,AT3G27850,AT3G49430,AT3G62840,AT4G02840,AT4G09040,AT4G21660,AT4G34110,AT5G14320,AT5G44500	GO:1990904
U1 snRNP	0.000197827	5	AT1G20580,AT2G47580,AT3G62840,AT4G02840,AT5G44500	GO:0005685
catalytic step 2 spliceosome	0.000226551	7	AT1G20580,AT2G43770,AT3G18790,AT3G62840,AT4G02840,AT4G21660,AT5G44500	GO:0071013
non-membrane-bounded organelle	0.000229327	20	AT1G09760,AT1G20580,AT1G48350,AT1G63680,AT1G75350,AT2G19480,AT2G33800,AT2G45640,AT2G47580,AT3G15190,AT3G27850,AT3G49430,AT3G54090,AT3G62840,AT4G02840,AT4G26110,AT5G14320,AT5G22330,AT5G44500,AT5G67630	GO:0043228
intracellular non-membrane-bounded organelle	0.000229327	20	AT1G09760,AT1G20580,AT1G48350,AT1G63680,AT1G75350,AT2G19480,AT2G33800,AT2G45640,AT2G47580,AT3G15190,AT3G27850,AT3G49430,AT3G54090,AT3G62840,AT4G02840,AT4G26110,AT5G14320,AT5G22330,AT5G44500,AT5G67630	GO:0043232
spliceosomal complex	0.000703678	9	AT1G20580,AT2G43770,AT2G47580,AT3G18790,AT3G49430,AT3G62840,AT4G02840,AT4G21660,AT5G44500	GO:0005681
precatalytic spliceosome	0.000801431	4	AT1G20580,AT3G62840,AT4G02840,AT4G21660	GO:0071011
nucleolus	0.000901864	11	AT1G09760,AT1G20580,AT1G48350,AT2G45640,AT2G47580,AT3G49430,AT3G62840,AT4G02840,AT5G22330,AT5G44500,AT5G67630	GO:0005730
U2 snRNP	0.00110482	5	AT1G20580,AT3G62840,AT4G02840,AT4G21660,AT5G44500	GO:0005686
spliceosomal snRNP complex	0.00120229	6	AT1G20580,AT2G47580,AT3G62840,AT4G02840,AT4G21660,AT5G44500	GO:0097525
small nuclear ribonucleoprotein complex	0.00129829	6	AT1G20580,AT2G47580,AT3G62840,AT4G02840,AT4G21660,AT5G44500	GO:0030532
Sm-like protein family complex	0.00187946	6	AT1G20580,AT2G47580,AT3G62840,AT4G02840,AT4G21660,AT5G44500	GO:0120114
cell wall	0.00797404	13	AT1G20190,AT1G35140,AT1G65590,AT1G65870,AT1G69530,AT1G72610,AT1G74000,AT2G16430,AT3G13790,AT4G13340,AT5G20950,AT5G21105,AT5G64260	GO:0005618
external encapsulating structure	0.00999608	13	AT1G20190,AT1G35140,AT1G65590,AT1G65870,AT1G69530,AT1G72610,AT1G74000,AT2G16430,AT3G13790,AT4G13340,AT5G20950,AT5G21105,AT5G64260	GO:0030312
U5 snRNP	0.0105231	4	AT1G20580,AT3G62840,AT4G02840,AT5G44500	GO:0005682
U12-type spliceosomal complex	0.0187358	3	AT1G20580,AT4G02840,AT4G21660	GO:0005689
R2TP complex	0.0250428	2	AT5G22330,AT5G67630	GO:0097255
extracellular region	0.0349101	17	AT1G04170,AT1G20190,AT1G35140,AT1G55210,AT1G65870,AT1G69530,AT1G72610,AT2G16430,AT3G12700,AT3G13790,AT4G13340,AT4G24780,AT4G39640,AT5G09440,AT5G20950,AT5G21105,AT5G64260	GO:0005576
chloroplast stroma	0.0357136	12	AT1G48350,AT1G63680,AT1G75350,AT2G33800,AT2G35410,AT2G38040,AT3G15190,AT3G23700,AT3G27850,AT3G54090,AT4G09040,AT5G14320	GO:0009570
plastid stroma	0.038762	12	AT1G48350,AT1G63680,AT1G75350,AT2G33800,AT2G35410,AT2G38040,AT3G15190,AT3G23700,AT3G27850,AT3G54090,AT4G09040,AT5G14320	GO:0009532
nuclear lumen	0.0439802	12	AT1G09760,AT1G20580,AT1G48350,AT2G45640,AT2G47580,AT3G18990,AT3G49430,AT3G62840,AT4G02840,AT5G22330,AT5G44500,AT5G67630	GO:0031981
His6-Myc-Csy4* all positive
GO MF	p-value	number	AGIs	GO
RNA binding	1.39036e-43	115	AT1G01080,AT1G02150,AT1G02840,AT1G04170,AT1G06220,AT1G07320,AT1G09340,AT1G09760,AT1G10580,AT1G10840,AT1G14410,AT1G14650,AT1G16720,AT1G17220,AT1G20580,AT1G20960,AT1G23410,AT1G24450,AT1G27090,AT1G31970,AT1G33330,AT1G43170,AT1G48160,AT1G48350,AT1G48410,AT1G48920,AT1G49760,AT1G51510,AT1G62390,AT1G67680,AT1G70770,AT1G73530,AT1G75350,AT1G76810,AT1G77180,AT2G02740,AT2G18510,AT2G18740,AT2G19730,AT2G19870…	GO:0003723
mRNA binding	4.95872e-34	88	AT1G01080,AT1G02150,AT1G02840,AT1G07320,AT1G09340,AT1G10580,AT1G10840,AT1G14410,AT1G16720,AT1G17220,AT1G23410,AT1G27090,AT1G33330,AT1G43170,AT1G48410,AT1G48920,AT1G49760,AT1G51510,AT1G62390,AT1G70770,AT1G73530,AT1G76810,AT2G02740,AT2G18510,AT2G19730,AT2G19870,AT2G21660,AT2G23350,AT2G24420,AT2G33410,AT2G33800,AT2G34040,AT2G34160,AT2G35410,AT2G36460,AT2G37220,AT2G40290,AT2G43030,AT3G02830,AT3G05060…	GO:0003729
nucleic acid binding	1.25383e-18	131	AT1G01080,AT1G02150,AT1G02840,AT1G04170,AT1G06220,AT1G06760,AT1G07320,AT1G09340,AT1G09760,AT1G10580,AT1G10840,AT1G12370,AT1G14410,AT1G14650,AT1G16720,AT1G17220,AT1G20580,AT1G20960,AT1G23410,AT1G24450,AT1G27090,AT1G31970,AT1G33330,AT1G43170,AT1G48160,AT1G48350,AT1G48410,AT1G48610,AT1G48620,AT1G48920,AT1G49760,AT1G51510,AT1G62390,AT1G67680,AT1G70770,AT1G73530,AT1G75350,AT1G76110,AT1G76810,AT1G76880…	GO:0003676
heterocyclic compound binding	1.17899e-10	165	AT1G01080,AT1G02150,AT1G02280,AT1G02840,AT1G04170,AT1G06220,AT1G06760,AT1G07320,AT1G09340,AT1G09760,AT1G10580,AT1G10840,AT1G12370,AT1G14410,AT1G14650,AT1G16300,AT1G16720,AT1G17220,AT1G20580,AT1G20960,AT1G23410,AT1G24450,AT1G27090,AT1G31970,AT1G33330,AT1G43170,AT1G48160,AT1G48350,AT1G48410,AT1G48610,AT1G48620,AT1G48920,AT1G49760,AT1G51510,AT1G62390,AT1G63680,AT1G67680,AT1G70770,AT1G71695,AT1G72710…	GO:1901363
organic cyclic compound binding	1.65871e-10	165	AT1G01080,AT1G02150,AT1G02280,AT1G02840,AT1G04170,AT1G06220,AT1G06760,AT1G07320,AT1G09340,AT1G09760,AT1G10580,AT1G10840,AT1G12370,AT1G14410,AT1G14650,AT1G16300,AT1G16720,AT1G17220,AT1G20580,AT1G20960,AT1G23410,AT1G24450,AT1G27090,AT1G31970,AT1G33330,AT1G43170,AT1G48160,AT1G48350,AT1G48410,AT1G48610,AT1G48620,AT1G48920,AT1G49760,AT1G51510,AT1G62390,AT1G63680,AT1G67680,AT1G70770,AT1G71695,AT1G72710…	GO:0097159
structural molecule activity	1.68156e-07	31	AT1G07320,AT1G18450,AT1G23410,AT1G43170,AT1G48350,AT1G75350,AT2G19730,AT2G21390,AT2G33800,AT2G43030,AT3G09200,AT3G15190,AT3G15980,AT3G25920,AT3G27850,AT3G53430,AT3G60830,AT4G01310,AT4G08350,AT4G13340,AT4G31490,AT4G34450,AT4G35570,AT5G13510,AT5G14320,AT5G20290,AT5G27770,AT5G54600,AT5G62300,AT5G66860,ATCG00820	GO:0005198
rRNA binding	1.42383e-05	14	AT1G07320,AT1G09340,AT1G48350,AT1G75350,AT2G33800,AT2G43030,AT3G09200,AT3G15190,AT3G53430,AT4G01310,AT5G13510,AT5G14320,AT5G54600,AT5G66860	GO:0019843
structural constituent of ribosome	0.000208392	23	AT1G07320,AT1G23410,AT1G43170,AT1G48350,AT1G75350,AT2G19730,AT2G33800,AT2G43030,AT3G09200,AT3G15190,AT3G25920,AT3G27850,AT3G53430,AT4G01310,AT4G08350,AT5G13510,AT5G14320,AT5G20290,AT5G27770,AT5G54600,AT5G62300,AT5G66860,ATCG00820	GO:0003735
heat shock protein binding	0.000354445	9	AT1G80030,AT2G22360,AT3G09350,AT3G44110,AT3G62600,AT4G39960,AT5G22060,AT5G42020,AT5G48030	GO:0031072
unfolded protein binding	0.000804857	11	AT1G08450,AT1G80030,AT2G22360,AT3G44110,AT3G62600,AT4G28480,AT4G39960,AT5G22060,AT5G42020,AT5G48030,AT5G49910	GO:0051082
binding	0.00233833	207	AT1G01080,AT1G02150,AT1G02280,AT1G02840,AT1G04170,AT1G06220,AT1G06760,AT1G07320,AT1G08450,AT1G09340,AT1G09760,AT1G10580,AT1G10840,AT1G12370,AT1G14410,AT1G14650,AT1G16300,AT1G16720,AT1G17220,AT1G18450,AT1G20580,AT1G20960,AT1G23410,AT1G24450,AT1G27090,AT1G31970,AT1G33330,AT1G43170,AT1G48160,AT1G48350,AT1G48410,AT1G48610,AT1G48620,AT1G48920,AT1G49670,AT1G49760,AT1G51510,AT1G62390,AT1G63680,AT1G65260…	GO:0005488
poly(U) RNA binding	0.00435833	7	AT1G07320,AT1G49760,AT2G23350,AT2G37220,AT3G53460,AT4G24770,AT4G34110	GO:0008266
poly-pyrimidine tract binding	0.0107172	7	AT1G07320,AT1G49760,AT2G23350,AT2G37220,AT3G53460,AT4G24770,AT4G34110	GO:0008187
snRNA binding	0.0127649	5	AT1G06220,AT1G09760,AT2G47580,AT3G50670,AT3G55220	GO:0017069
catalytic activity, acting on RNA	0.0234233	21	AT1G20960,AT1G24450,AT1G31970,AT1G48410,AT1G66520,AT2G04530,AT2G19870,AT2G32230,AT2G39670,AT3G01540,AT3G06980,AT3G19760,AT3G46100,AT3G61240,AT4G38020,AT5G08610,AT5G23600,AT5G52470,AT5G64050,AT5G66860,ATCG00180	GO:0140098
translation factor activity, RNA binding	0.0284601	13	AT1G04170,AT1G10840,AT1G17220,AT1G33330,AT1G49760,AT1G76810,AT2G23350,AT2G40290,AT4G30690,AT4G34110,AT5G05470,AT5G20920,AT5G60390	GO:0008135
translation initiation factor activity	0.030067	11	AT1G04170,AT1G10840,AT1G17220,AT1G49760,AT1G76810,AT2G23350,AT2G40290,AT4G30690,AT4G34110,AT5G05470,AT5G20920	GO:0003743
translation regulator activity, nucleic acid binding	0.0467114	13	AT1G04170,AT1G10840,AT1G17220,AT1G33330,AT1G49760,AT1G76810,AT2G23350,AT2G40290,AT4G30690,AT4G34110,AT5G05470,AT5G20920,AT5G60390	GO:0090079
GO BP	p-value	number	AGIs	GO
RNA processing	1.61438e-17	60	AT1G01080,AT1G02840,AT1G04510,AT1G06220,AT1G09340,AT1G09760,AT1G10580,AT1G14650,AT1G20580,AT1G20960,AT1G24450,AT1G31970,AT1G48920,AT1G51510,AT1G66520,AT1G73530,AT1G73720,AT1G77180,AT2G04530,AT2G18510,AT2G18740,AT2G19870,AT2G21660,AT2G27100,AT2G32230,AT2G32600,AT2G33800,AT2G34160,AT2G37220,AT2G39670,AT2G47580,AT3G01540,AT3G18790,AT3G19760,AT3G23700,AT3G49430,AT3G50670,AT3G53460,AT3G55220,AT3G61240…	GO:0006396
gene expression	1.26062e-15	122	AT1G01080,AT1G02840,AT1G04170,AT1G04510,AT1G06220,AT1G07320,AT1G09340,AT1G09760,AT1G10580,AT1G10840,AT1G14410,AT1G14650,AT1G16720,AT1G17220,AT1G18450,AT1G20580,AT1G20960,AT1G23410,AT1G24450,AT1G31970,AT1G33330,AT1G43170,AT1G48350,AT1G48410,AT1G48920,AT1G49760,AT1G51510,AT1G66520,AT1G69200,AT1G73530,AT1G73720,AT1G74850,AT1G75350,AT1G76110,AT1G76880,AT1G77180,AT2G02740,AT2G04530,AT2G18510,AT2G18740…	GO:0010467
cellular nitrogen compound metabolic process	9.6182e-15	138	AT1G01080,AT1G02840,AT1G04170,AT1G04510,AT1G06220,AT1G06760,AT1G07320,AT1G09340,AT1G09760,AT1G10580,AT1G10840,AT1G12370,AT1G14410,AT1G14650,AT1G16300,AT1G16720,AT1G17220,AT1G18450,AT1G20580,AT1G20960,AT1G23410,AT1G24450,AT1G31970,AT1G33330,AT1G43170,AT1G48350,AT1G48410,AT1G48620,AT1G48920,AT1G49760,AT1G51510,AT1G66520,AT1G69200,AT1G73530,AT1G73720,AT1G74850,AT1G75350,AT1G76110,AT1G76880,AT1G77180…	GO:0034641
ribonucleoprotein complex biogenesis	2.13788e-12	37	AT1G01080,AT1G04170,AT1G04510,AT1G09340,AT1G10840,AT1G20580,AT1G20960,AT1G31970,AT1G43170,AT1G48920,AT2G18740,AT2G32600,AT2G33800,AT2G34160,AT2G37220,AT2G39670,AT3G01540,AT3G05060,AT3G09200,AT3G18790,AT3G23700,AT3G53460,AT3G62840,AT4G02840,AT4G05410,AT4G24770,AT4G32720,AT5G20290,AT5G20920,AT5G22330,AT5G27120,AT5G28740,AT5G41770,AT5G52470,AT5G63420,AT5G64270,AT5G67630	GO:0022613
translation	4.26957e-12	44	AT1G04170,AT1G07320,AT1G09340,AT1G10840,AT1G16720,AT1G17220,AT1G23410,AT1G33330,AT1G43170,AT1G48350,AT1G48410,AT1G48920,AT1G49760,AT1G51510,AT1G75350,AT2G19730,AT2G23350,AT2G33800,AT2G43030,AT3G02830,AT3G09200,AT3G13460,AT3G15190,AT3G19760,AT3G25920,AT3G27850,AT3G46100,AT3G53430,AT3G61240,AT4G01310,AT4G08350,AT4G34110,AT5G13510,AT5G14320,AT5G14660,AT5G20290,AT5G20920,AT5G27770,AT5G54600,AT5G60390…	GO:0006412
amide biosynthetic process	4.45962e-12	46	AT1G04170,AT1G07320,AT1G09340,AT1G10840,AT1G16720,AT1G17220,AT1G23410,AT1G33330,AT1G43170,AT1G48350,AT1G48410,AT1G48920,AT1G49760,AT1G51510,AT1G75350,AT2G19730,AT2G23350,AT2G33800,AT2G38040,AT2G43030,AT3G02830,AT3G06650,AT3G09200,AT3G13460,AT3G15190,AT3G19760,AT3G25920,AT3G27850,AT3G46100,AT3G53430,AT3G61240,AT4G01310,AT4G08350,AT4G34110,AT5G13510,AT5G14320,AT5G14660,AT5G20290,AT5G20920,AT5G27770…	GO:0043604
mRNA splicing, via spliceosome	4.87864e-12	28	AT1G02840,AT1G04510,AT1G06220,AT1G09760,AT1G10580,AT1G14650,AT1G20580,AT1G20960,AT1G77180,AT2G18510,AT2G18740,AT2G21660,AT2G27100,AT2G32600,AT2G47580,AT3G18790,AT3G49430,AT3G50670,AT3G55220,AT3G62840,AT4G02840,AT4G15900,AT4G21660,AT5G04280,AT5G28740,AT5G41770,AT5G44500,AT5G64270	GO:0000398
peptide biosynthetic process	5.5477e-12	44	AT1G04170,AT1G07320,AT1G09340,AT1G10840,AT1G16720,AT1G17220,AT1G23410,AT1G33330,AT1G43170,AT1G48350,AT1G48410,AT1G48920,AT1G49760,AT1G51510,AT1G75350,AT2G19730,AT2G23350,AT2G33800,AT2G43030,AT3G02830,AT3G09200,AT3G13460,AT3G15190,AT3G19760,AT3G25920,AT3G27850,AT3G46100,AT3G53430,AT3G61240,AT4G01310,AT4G08350,AT4G34110,AT5G13510,AT5G14320,AT5G14660,AT5G20290,AT5G20920,AT5G27770,AT5G54600,AT5G60390…	GO:0043043
mRNA processing	3.54364e-11	37	AT1G02840,AT1G04510,AT1G06220,AT1G09760,AT1G10580,AT1G14650,AT1G20580,AT1G20960,AT1G51510,AT1G73530,AT1G73720,AT1G77180,AT2G18510,AT2G18740,AT2G21660,AT2G27100,AT2G32600,AT2G37220,AT2G47580,AT3G18790,AT3G19760,AT3G49430,AT3G50670,AT3G53460,AT3G55220,AT3G61240,AT3G62840,AT4G02840,AT4G15900,AT4G21660,AT4G24770,AT5G04280,AT5G28740,AT5G40490,AT5G41770,AT5G44500,AT5G64270	GO:0006397
RNA splicing, via transesterification reactions	7.2504e-11	28	AT1G02840,AT1G04510,AT1G06220,AT1G09760,AT1G10580,AT1G14650,AT1G20580,AT1G20960,AT1G77180,AT2G18510,AT2G18740,AT2G21660,AT2G27100,AT2G32600,AT2G47580,AT3G18790,AT3G49430,AT3G50670,AT3G55220,AT3G62840,AT4G02840,AT4G15900,AT4G21660,AT5G04280,AT5G28740,AT5G41770,AT5G44500,AT5G64270	GO:0000375
RNA splicing, via transesterification reactions with bulged adenosine as nucleophile	7.2504e-11	28	AT1G02840,AT1G04510,AT1G06220,AT1G09760,AT1G10580,AT1G14650,AT1G20580,AT1G20960,AT1G77180,AT2G18510,AT2G18740,AT2G21660,AT2G27100,AT2G32600,AT2G47580,AT3G18790,AT3G49430,AT3G50670,AT3G55220,AT3G62840,AT4G02840,AT4G15900,AT4G21660,AT5G04280,AT5G28740,AT5G41770,AT5G44500,AT5G64270	GO:0000377
mRNA metabolic process	9.79558e-11	41	AT1G02840,AT1G04510,AT1G06220,AT1G09760,AT1G10580,AT1G14650,AT1G20580,AT1G20960,AT1G51510,AT1G73530,AT1G73720,AT1G77180,AT2G18510,AT2G18740,AT2G21660,AT2G27100,AT2G32600,AT2G37220,AT2G47580,AT3G01540,AT3G13460,AT3G18790,AT3G19760,AT3G49430,AT3G50670,AT3G53460,AT3G55220,AT3G61240,AT3G62840,AT4G02840,AT4G15900,AT4G21660,AT4G24770,AT4G34110,AT5G04280,AT5G14460,AT5G28740,AT5G40490,AT5G41770,AT5G44500…	GO:0016071
RNA splicing	1.11676e-10	33	AT1G02840,AT1G04510,AT1G06220,AT1G09760,AT1G10580,AT1G14650,AT1G20580,AT1G20960,AT1G51510,AT1G73720,AT1G77180,AT2G18510,AT2G18740,AT2G21660,AT2G27100,AT2G32600,AT2G47580,AT3G18790,AT3G19760,AT3G49430,AT3G50670,AT3G53460,AT3G55220,AT3G62840,AT4G02840,AT4G15900,AT4G21660,AT5G04280,AT5G23600,AT5G28740,AT5G41770,AT5G44500,AT5G64270	GO:0008380
peptide metabolic process	1.9442e-10	45	AT1G04170,AT1G07320,AT1G09340,AT1G10840,AT1G16720,AT1G17220,AT1G23410,AT1G33330,AT1G43170,AT1G48350,AT1G48410,AT1G48920,AT1G49760,AT1G51510,AT1G75350,AT2G19730,AT2G23350,AT2G33800,AT2G43030,AT3G02830,AT3G09200,AT3G13460,AT3G15190,AT3G19760,AT3G25920,AT3G27850,AT3G46100,AT3G53430,AT3G61240,AT4G01310,AT4G08350,AT4G34110,AT4G39640,AT5G13510,AT5G14320,AT5G14660,AT5G20290,AT5G20920,AT5G27770,AT5G54600…	GO:0006518
cellular amide metabolic process	7.86316e-10	47	AT1G04170,AT1G07320,AT1G09340,AT1G10840,AT1G16720,AT1G17220,AT1G23410,AT1G33330,AT1G43170,AT1G48350,AT1G48410,AT1G48920,AT1G49760,AT1G51510,AT1G75350,AT2G19730,AT2G23350,AT2G33800,AT2G38040,AT2G43030,AT3G02830,AT3G06650,AT3G09200,AT3G13460,AT3G15190,AT3G19760,AT3G25920,AT3G27850,AT3G46100,AT3G53430,AT3G61240,AT4G01310,AT4G08350,AT4G34110,AT4G39640,AT5G13510,AT5G14320,AT5G14660,AT5G20290,AT5G20920…	GO:0043603
ribonucleoprotein complex assembly	1.81599e-07	19	AT1G04170,AT1G04510,AT1G10840,AT1G20580,AT1G20960,AT1G43170,AT1G48920,AT2G18740,AT2G32600,AT3G09200,AT3G18790,AT3G62840,AT4G02840,AT5G20920,AT5G22330,AT5G28740,AT5G41770,AT5G64270,AT5G67630	GO:0022618
ribonucleoprotein complex subunit organization	2.5153e-07	19	AT1G04170,AT1G04510,AT1G10840,AT1G20580,AT1G20960,AT1G43170,AT1G48920,AT2G18740,AT2G32600,AT3G09200,AT3G18790,AT3G62840,AT4G02840,AT5G20920,AT5G22330,AT5G28740,AT5G41770,AT5G64270,AT5G67630	GO:0071826
nucleobase-containing compound metabolic process	7.30204e-07	103	AT1G01080,AT1G02840,AT1G04510,AT1G06220,AT1G06760,AT1G09340,AT1G09760,AT1G10580,AT1G12370,AT1G14410,AT1G14650,AT1G16300,AT1G18450,AT1G20580,AT1G20960,AT1G24450,AT1G31970,AT1G48620,AT1G48920,AT1G51510,AT1G66520,AT1G69200,AT1G73530,AT1G73720,AT1G74850,AT1G76110,AT1G76880,AT1G77180,AT2G02740,AT2G04530,AT2G18510,AT2G18740,AT2G19480,AT2G19520,AT2G19870,AT2G21660,AT2G23420,AT2G27100,AT2G32230,AT2G32600…	GO:0006139
RNA metabolic process	1.22752e-06	87	AT1G01080,AT1G02840,AT1G04510,AT1G06220,AT1G09340,AT1G09760,AT1G10580,AT1G14410,AT1G14650,AT1G18450,AT1G20580,AT1G20960,AT1G24450,AT1G31970,AT1G48920,AT1G51510,AT1G66520,AT1G69200,AT1G73530,AT1G73720,AT1G74850,AT1G76110,AT1G76880,AT1G77180,AT2G02740,AT2G04530,AT2G18510,AT2G18740,AT2G19520,AT2G19870,AT2G21660,AT2G27100,AT2G32230,AT2G32600,AT2G33800,AT2G34160,AT2G37220,AT2G39670,AT2G45640,AT2G47580…	GO:0016070
nucleic acid metabolic process	4.52148e-06	95	AT1G01080,AT1G02840,AT1G04510,AT1G06220,AT1G06760,AT1G09340,AT1G09760,AT1G10580,AT1G12370,AT1G14410,AT1G14650,AT1G18450,AT1G20580,AT1G20960,AT1G24450,AT1G31970,AT1G48620,AT1G48920,AT1G51510,AT1G66520,AT1G69200,AT1G73530,AT1G73720,AT1G74850,AT1G76110,AT1G76880,AT1G77180,AT2G02740,AT2G04530,AT2G18510,AT2G18740,AT2G19480,AT2G19520,AT2G19870,AT2G21660,AT2G27100,AT2G32230,AT2G32600,AT2G33800,AT2G34160…	GO:0090304
cellular component organization or biogenesis	1.4711e-05	86	AT1G01080,AT1G04170,AT1G04510,AT1G06760,AT1G09340,AT1G10840,AT1G14410,AT1G16720,AT1G18450,AT1G20190,AT1G20580,AT1G20960,AT1G24450,AT1G31970,AT1G33330,AT1G43170,AT1G48160,AT1G48620,AT1G48920,AT1G63680,AT1G65260,AT1G69200,AT1G69530,AT1G76110,AT2G18740,AT2G19480,AT2G19520,AT2G21660,AT2G32600,AT2G33800,AT2G34160,AT2G37220,AT2G39670,AT2G45220,AT2G47450,AT3G01540,AT3G05060,AT3G09200,AT3G09840,AT3G10690…	GO:0071840
heterocycle metabolic process	1.83086e-05	105	AT1G01080,AT1G02840,AT1G04510,AT1G06220,AT1G06760,AT1G09340,AT1G09760,AT1G10580,AT1G12370,AT1G14410,AT1G14650,AT1G16300,AT1G18450,AT1G20580,AT1G20960,AT1G24450,AT1G31970,AT1G48620,AT1G48920,AT1G51510,AT1G66520,AT1G69200,AT1G73530,AT1G73720,AT1G74850,AT1G76110,AT1G76880,AT1G77180,AT2G02740,AT2G04530,AT2G18510,AT2G18740,AT2G19480,AT2G19520,AT2G19870,AT2G21660,AT2G23420,AT2G27100,AT2G32230,AT2G32600…	GO:0046483
cellular macromolecule biosynthetic process	6.45189e-05	48	AT1G04170,AT1G07320,AT1G09340,AT1G10840,AT1G14410,AT1G16720,AT1G17220,AT1G23410,AT1G33330,AT1G43170,AT1G48350,AT1G48410,AT1G48920,AT1G49760,AT1G51510,AT1G75350,AT2G19730,AT2G23350,AT2G33800,AT2G43030,AT3G02830,AT3G09200,AT3G13460,AT3G15190,AT3G19760,AT3G25920,AT3G27850,AT3G28730,AT3G46100,AT3G53430,AT3G61240,AT4G01310,AT4G08350,AT4G34110,AT5G13510,AT5G14320,AT5G14660,AT5G20290,AT5G20920,AT5G20950…	GO:0034645
macromolecule metabolic process	8.12797e-05	149	AT1G01080,AT1G02840,AT1G04170,AT1G04510,AT1G06220,AT1G06760,AT1G07320,AT1G08450,AT1G09340,AT1G09760,AT1G10580,AT1G10840,AT1G12370,AT1G14410,AT1G14650,AT1G16720,AT1G17220,AT1G18450,AT1G20580,AT1G20960,AT1G23410,AT1G24450,AT1G31970,AT1G33330,AT1G43170,AT1G48350,AT1G48410,AT1G48620,AT1G48920,AT1G49760,AT1G51510,AT1G65590,AT1G66520,AT1G69200,AT1G72710,AT1G73530,AT1G73720,AT1G74850,AT1G75350,AT1G76110…	GO:0043170
cellular aromatic compound metabolic process	9.37956e-05	105	AT1G01080,AT1G02840,AT1G04510,AT1G06220,AT1G06760,AT1G09340,AT1G09760,AT1G10580,AT1G12370,AT1G14410,AT1G14650,AT1G16300,AT1G18450,AT1G20580,AT1G20960,AT1G24450,AT1G31970,AT1G48620,AT1G48920,AT1G51510,AT1G66520,AT1G69200,AT1G73530,AT1G73720,AT1G74850,AT1G76110,AT1G76880,AT1G77180,AT2G02740,AT2G04530,AT2G18510,AT2G18740,AT2G19480,AT2G19520,AT2G19870,AT2G21660,AT2G23420,AT2G27100,AT2G32230,AT2G32600…	GO:0006725
nitrogen compound metabolic process	0.000283206	152	AT1G01080,AT1G02840,AT1G04170,AT1G04510,AT1G06220,AT1G06760,AT1G07320,AT1G08450,AT1G09340,AT1G09760,AT1G10580,AT1G10840,AT1G12370,AT1G14410,AT1G14650,AT1G16300,AT1G16720,AT1G17220,AT1G18450,AT1G20580,AT1G20960,AT1G23410,AT1G24450,AT1G31970,AT1G33330,AT1G43170,AT1G48350,AT1G48410,AT1G48620,AT1G48920,AT1G49760,AT1G51510,AT1G65590,AT1G66520,AT1G69200,AT1G72710,AT1G73530,AT1G73720,AT1G74000,AT1G74850…	GO:0006807
organonitrogen compound biosynthetic process	0.000297976	51	AT1G04170,AT1G07320,AT1G09340,AT1G10840,AT1G16720,AT1G17220,AT1G23410,AT1G33330,AT1G43170,AT1G48350,AT1G48410,AT1G48920,AT1G49760,AT1G51510,AT1G75350,AT2G19730,AT2G23350,AT2G23420,AT2G33800,AT2G38040,AT2G38280,AT2G42910,AT2G43030,AT3G02830,AT3G03630,AT3G06650,AT3G09200,AT3G13460,AT3G15190,AT3G19760,AT3G25920,AT3G27850,AT3G46100,AT3G53430,AT3G61240,AT4G01310,AT4G08350,AT4G34110,AT5G13510,AT5G14320…	GO:1901566
protein-containing complex organization	0.00037341	31	AT1G04170,AT1G04510,AT1G06760,AT1G10840,AT1G16720,AT1G20580,AT1G20960,AT1G33330,AT1G43170,AT1G48160,AT1G48620,AT1G48920,AT2G18740,AT2G19480,AT2G32600,AT2G47450,AT3G09200,AT3G09840,AT3G18035,AT3G18790,AT3G62840,AT4G02840,AT4G26110,AT4G26370,AT5G14170,AT5G20920,AT5G22330,AT5G28740,AT5G41770,AT5G64270,AT5G67630	GO:0043933
cellular component biogenesis	0.000447522	50	AT1G01080,AT1G04170,AT1G04510,AT1G06760,AT1G09340,AT1G10840,AT1G16720,AT1G20580,AT1G20960,AT1G31970,AT1G43170,AT1G48160,AT1G48620,AT1G48920,AT2G18740,AT2G19480,AT2G19520,AT2G32600,AT2G33800,AT2G34160,AT2G37220,AT2G39670,AT2G47450,AT3G01540,AT3G05060,AT3G09200,AT3G18035,AT3G18790,AT3G23700,AT3G44990,AT3G53460,AT3G61240,AT3G62840,AT4G02840,AT4G05410,AT4G24770,AT4G26110,AT4G32720,AT5G20290,AT5G20920…	GO:0044085
organic cyclic compound metabolic process	0.000463685	105	AT1G01080,AT1G02840,AT1G04510,AT1G06220,AT1G06760,AT1G09340,AT1G09760,AT1G10580,AT1G12370,AT1G14410,AT1G14650,AT1G16300,AT1G18450,AT1G20580,AT1G20960,AT1G24450,AT1G31970,AT1G48620,AT1G48920,AT1G51510,AT1G66520,AT1G69200,AT1G73530,AT1G73720,AT1G74850,AT1G76110,AT1G76880,AT1G77180,AT2G02740,AT2G04530,AT2G18510,AT2G18740,AT2G19480,AT2G19520,AT2G19870,AT2G21660,AT2G23420,AT2G27100,AT2G32230,AT2G32600…	GO:1901360
posttranscriptional regulation of gene expression	0.000877601	17	AT1G04170,AT1G09340,AT1G10840,AT1G24450,AT1G48410,AT1G49760,AT1G51510,AT2G23350,AT2G27100,AT3G02830,AT3G13460,AT3G19760,AT3G53460,AT3G61240,AT4G02840,AT4G24770,AT4G34110	GO:0010608
ribosome biogenesis	0.000923484	21	AT1G01080,AT1G09340,AT1G31970,AT1G43170,AT1G48920,AT2G33800,AT2G34160,AT2G37220,AT2G39670,AT3G01540,AT3G05060,AT3G09200,AT3G23700,AT3G53460,AT4G05410,AT4G24770,AT4G32720,AT5G20290,AT5G27120,AT5G52470,AT5G63420	GO:0042254
ncRNA processing	0.00157952	24	AT1G01080,AT1G09340,AT1G24450,AT1G31970,AT1G48920,AT1G66520,AT2G04530,AT2G27100,AT2G32230,AT2G33800,AT2G34160,AT2G37220,AT2G39670,AT3G01540,AT3G23700,AT3G53460,AT4G05410,AT4G24770,AT4G32720,AT5G14460,AT5G20290,AT5G23600,AT5G52470,AT5G63420	GO:0034470
protein-containing complex assembly	0.00172851	27	AT1G04170,AT1G04510,AT1G06760,AT1G10840,AT1G16720,AT1G20580,AT1G20960,AT1G43170,AT1G48160,AT1G48620,AT1G48920,AT2G18740,AT2G19480,AT2G32600,AT2G47450,AT3G09200,AT3G18035,AT3G18790,AT3G62840,AT4G02840,AT4G26110,AT5G20920,AT5G22330,AT5G28740,AT5G41770,AT5G64270,AT5G67630	GO:0065003
ncRNA metabolic process	0.00266463	26	AT1G01080,AT1G09340,AT1G24450,AT1G31970,AT1G48920,AT1G66520,AT2G04530,AT2G27100,AT2G32230,AT2G33800,AT2G34160,AT2G37220,AT2G39670,AT3G01540,AT3G23700,AT3G46100,AT3G53460,AT4G05410,AT4G24770,AT4G32720,AT5G14460,AT5G20290,AT5G23600,AT5G52470,AT5G63420,AT5G64050	GO:0034660
rRNA processing	0.0030381	17	AT1G01080,AT1G09340,AT1G31970,AT1G48920,AT2G33800,AT2G34160,AT2G37220,AT2G39670,AT3G01540,AT3G23700,AT3G53460,AT4G05410,AT4G24770,AT4G32720,AT5G20290,AT5G52470,AT5G63420	GO:0006364
cellular nitrogen compound biosynthetic process	0.00316998	77	AT1G04170,AT1G07320,AT1G09340,AT1G10840,AT1G14410,AT1G16720,AT1G17220,AT1G18450,AT1G23410,AT1G33330,AT1G43170,AT1G48350,AT1G48410,AT1G48920,AT1G49760,AT1G51510,AT1G69200,AT1G74850,AT1G75350,AT1G76110,AT1G76880,AT1G77180,AT2G02740,AT2G18510,AT2G19520,AT2G19730,AT2G23350,AT2G23420,AT2G27100,AT2G33800,AT2G38040,AT2G38280,AT2G42910,AT2G43030,AT2G45640,AT3G02830,AT3G06650,AT3G09200,AT3G13460,AT3G15190…	GO:0044271
primary metabolic process	0.00326878	167	AT1G01080,AT1G02840,AT1G04170,AT1G04510,AT1G06220,AT1G06760,AT1G07320,AT1G08450,AT1G09340,AT1G09760,AT1G10580,AT1G10840,AT1G12370,AT1G14410,AT1G14650,AT1G16300,AT1G16720,AT1G17220,AT1G18450,AT1G20580,AT1G20960,AT1G23410,AT1G24450,AT1G31970,AT1G33330,AT1G33811,AT1G43170,AT1G48350,AT1G48410,AT1G48620,AT1G48920,AT1G49760,AT1G51510,AT1G65590,AT1G66520,AT1G69200,AT1G72710,AT1G72970,AT1G73530,AT1G73720…	GO:0044238
rRNA metabolic process	0.00569635	17	AT1G01080,AT1G09340,AT1G31970,AT1G48920,AT2G33800,AT2G34160,AT2G37220,AT2G39670,AT3G01540,AT3G23700,AT3G53460,AT4G05410,AT4G24770,AT4G32720,AT5G20290,AT5G52470,AT5G63420	GO:0016072
cellular component organization	0.0106354	71	AT1G04170,AT1G04510,AT1G06760,AT1G09340,AT1G10840,AT1G14410,AT1G16720,AT1G18450,AT1G20190,AT1G20580,AT1G20960,AT1G24450,AT1G33330,AT1G43170,AT1G48160,AT1G48620,AT1G48920,AT1G63680,AT1G65260,AT1G69200,AT1G69530,AT1G76110,AT2G18740,AT2G19480,AT2G19520,AT2G21660,AT2G32600,AT2G33800,AT2G45220,AT2G47450,AT3G09200,AT3G09840,AT3G10690,AT3G18035,AT3G18790,AT3G23700,AT3G28730,AT3G44990,AT3G54090,AT3G60190…	GO:0016043
chromatin remodeling	0.0207492	9	AT1G06760,AT1G48620,AT2G19480,AT3G18035,AT4G26110,AT4G26630,AT5G14170,AT5G22330,AT5G67630	GO:0006338
chloroplast rRNA processing	0.0236291	5	AT1G01080,AT2G33800,AT2G37220,AT3G53460,AT4G24770	GO:1901259
regulation of translation	0.0294099	12	AT1G04170,AT1G09340,AT1G10840,AT1G48410,AT1G49760,AT1G51510,AT2G23350,AT3G02830,AT3G13460,AT3G19760,AT3G61240,AT4G34110	GO:0006417
regulation of cellular amide metabolic process	0.0332194	12	AT1G04170,AT1G09340,AT1G10840,AT1G48410,AT1G49760,AT1G51510,AT2G23350,AT3G02830,AT3G13460,AT3G19760,AT3G61240,AT4G34110	GO:0034248
GO CC	p-value	number	AGIs	GO
non-membrane-bounded organelle	6.03753e-26	89	AT1G04510,AT1G04980,AT1G06760,AT1G07320,AT1G09340,AT1G09760,AT1G10840,AT1G14410,AT1G18450,AT1G20580,AT1G20960,AT1G23410,AT1G31970,AT1G43170,AT1G48350,AT1G48620,AT1G48920,AT1G51510,AT1G63680,AT1G65260,AT1G69200,AT1G74850,AT1G75350,AT1G77180,AT2G02740,AT2G18510,AT2G19480,AT2G19520,AT2G19730,AT2G27100,AT2G33800,AT2G43030,AT2G45640,AT2G47580,AT3G01540,AT3G04260,AT3G05060,AT3G09200,AT3G09840,AT3G10690…	GO:0043228
intracellular non-membrane-bounded organelle	6.03753e-26	89	AT1G04510,AT1G04980,AT1G06760,AT1G07320,AT1G09340,AT1G09760,AT1G10840,AT1G14410,AT1G18450,AT1G20580,AT1G20960,AT1G23410,AT1G31970,AT1G43170,AT1G48350,AT1G48620,AT1G48920,AT1G51510,AT1G63680,AT1G65260,AT1G69200,AT1G74850,AT1G75350,AT1G77180,AT2G02740,AT2G18510,AT2G19480,AT2G19520,AT2G19730,AT2G27100,AT2G33800,AT2G43030,AT2G45640,AT2G47580,AT3G01540,AT3G04260,AT3G05060,AT3G09200,AT3G09840,AT3G10690…	GO:0043232
ribonucleoprotein complex	7.01433e-26	62	AT1G02840,AT1G04510,AT1G06220,AT1G07320,AT1G10580,AT1G10840,AT1G14650,AT1G20580,AT1G20960,AT1G23410,AT1G43170,AT1G48160,AT1G49760,AT1G67680,AT1G73720,AT1G77180,AT2G18510,AT2G18740,AT2G19730,AT2G23350,AT2G32600,AT2G33800,AT2G35410,AT2G40290,AT2G43770,AT2G47450,AT2G47580,AT3G01540,AT3G05060,AT3G09200,AT3G15190,AT3G18790,AT3G19760,AT3G25920,AT3G27850,AT3G49430,AT3G50670,AT3G53430,AT3G55220,AT3G62840…	GO:1990904
nucleolus	3.32441e-20	46	AT1G04510,AT1G04980,AT1G09760,AT1G18450,AT1G20580,AT1G20960,AT1G31970,AT1G43170,AT1G48350,AT1G48620,AT1G48920,AT1G51510,AT1G77180,AT2G18510,AT2G19520,AT2G19730,AT2G27100,AT2G45640,AT2G47580,AT3G01540,AT3G05060,AT3G09200,AT3G09840,AT3G18035,AT3G19760,AT3G44110,AT3G44750,AT3G49430,AT3G62840,AT4G02840,AT4G05410,AT4G26630,AT4G32720,AT5G03740,AT5G04280,AT5G10010,AT5G20290,AT5G22330,AT5G22650,AT5G27120…	GO:0005730
nuclear lumen	1.22304e-15	55	AT1G02840,AT1G04510,AT1G04980,AT1G06220,AT1G09760,AT1G18450,AT1G20580,AT1G20960,AT1G31970,AT1G43170,AT1G48350,AT1G48620,AT1G48920,AT1G51510,AT1G73720,AT1G77180,AT2G18510,AT2G19520,AT2G19730,AT2G27100,AT2G45640,AT2G47580,AT3G01540,AT3G05060,AT3G09200,AT3G09840,AT3G13224,AT3G18035,AT3G18990,AT3G19760,AT3G28730,AT3G44110,AT3G44750,AT3G49430,AT3G50670,AT3G62840,AT4G02840,AT4G05410,AT4G08350,AT4G26630…	GO:0031981
membrane-enclosed lumen	3.18505e-14	59	AT1G02840,AT1G04510,AT1G04980,AT1G06220,AT1G08450,AT1G09760,AT1G18450,AT1G20580,AT1G20960,AT1G31970,AT1G43170,AT1G48350,AT1G48620,AT1G48920,AT1G51510,AT1G73720,AT1G77180,AT2G18510,AT2G19520,AT2G19730,AT2G27100,AT2G32920,AT2G33800,AT2G45640,AT2G47580,AT3G01540,AT3G05060,AT3G09200,AT3G09840,AT3G13224,AT3G18035,AT3G18990,AT3G19760,AT3G28730,AT3G44110,AT3G44750,AT3G49430,AT3G50670,AT3G62600,AT3G62840…	GO:0031974
organelle lumen	3.18505e-14	59	AT1G02840,AT1G04510,AT1G04980,AT1G06220,AT1G08450,AT1G09760,AT1G18450,AT1G20580,AT1G20960,AT1G31970,AT1G43170,AT1G48350,AT1G48620,AT1G48920,AT1G51510,AT1G73720,AT1G77180,AT2G18510,AT2G19520,AT2G19730,AT2G27100,AT2G32920,AT2G33800,AT2G45640,AT2G47580,AT3G01540,AT3G05060,AT3G09200,AT3G09840,AT3G13224,AT3G18035,AT3G18990,AT3G19760,AT3G28730,AT3G44110,AT3G44750,AT3G49430,AT3G50670,AT3G62600,AT3G62840…	GO:0043233
intracellular organelle lumen	3.18505e-14	59	AT1G02840,AT1G04510,AT1G04980,AT1G06220,AT1G08450,AT1G09760,AT1G18450,AT1G20580,AT1G20960,AT1G31970,AT1G43170,AT1G48350,AT1G48620,AT1G48920,AT1G51510,AT1G73720,AT1G77180,AT2G18510,AT2G19520,AT2G19730,AT2G27100,AT2G32920,AT2G33800,AT2G45640,AT2G47580,AT3G01540,AT3G05060,AT3G09200,AT3G09840,AT3G13224,AT3G18035,AT3G18990,AT3G19760,AT3G28730,AT3G44110,AT3G44750,AT3G49430,AT3G50670,AT3G62600,AT3G62840…	GO:0070013
protein-containing complex	4.36095e-12	93	AT1G02840,AT1G04170,AT1G04510,AT1G06220,AT1G06760,AT1G07320,AT1G09340,AT1G10580,AT1G10840,AT1G14650,AT1G16720,AT1G18450,AT1G20580,AT1G20960,AT1G23410,AT1G43170,AT1G48160,AT1G48620,AT1G49760,AT1G51510,AT1G67680,AT1G69200,AT1G73720,AT1G77180,AT2G18510,AT2G18740,AT2G19520,AT2G19730,AT2G21390,AT2G23350,AT2G27100,AT2G32600,AT2G33800,AT2G35410,AT2G38040,AT2G40290,AT2G42910,AT2G43770,AT2G47450,AT2G47580…	GO:0032991
spliceosomal complex	1.20451e-11	26	AT1G02840,AT1G04510,AT1G06220,AT1G10580,AT1G14650,AT1G20580,AT1G20960,AT1G73720,AT1G77180,AT2G18510,AT2G18740,AT2G32600,AT2G43770,AT2G47580,AT3G18790,AT3G19760,AT3G49430,AT3G50670,AT3G62840,AT4G02840,AT4G15900,AT4G21660,AT5G28740,AT5G41770,AT5G44500,AT5G64270	GO:0005681
cell wall	2.01585e-11	45	AT1G04980,AT1G06220,AT1G20190,AT1G28290,AT1G35140,AT1G43170,AT1G65590,AT1G65870,AT1G69530,AT1G71695,AT1G72610,AT1G74000,AT1G78820,AT2G05920,AT2G16430,AT2G19730,AT2G33530,AT2G34810,AT2G45220,AT3G09840,AT3G13790,AT3G18080,AT3G20820,AT3G22060,AT3G44110,AT3G44990,AT3G52500,AT3G55430,AT4G08950,AT4G13340,AT4G30690,AT4G32720,AT5G07030,AT5G10160,AT5G11420,AT5G20290,AT5G20950,AT5G21105,AT5G22650,AT5G25460…	GO:0005618
external encapsulating structure	4.43144e-11	45	AT1G04980,AT1G06220,AT1G20190,AT1G28290,AT1G35140,AT1G43170,AT1G65590,AT1G65870,AT1G69530,AT1G71695,AT1G72610,AT1G74000,AT1G78820,AT2G05920,AT2G16430,AT2G19730,AT2G33530,AT2G34810,AT2G45220,AT3G09840,AT3G13790,AT3G18080,AT3G20820,AT3G22060,AT3G44110,AT3G44990,AT3G52500,AT3G55430,AT4G08950,AT4G13340,AT4G30690,AT4G32720,AT5G07030,AT5G10160,AT5G11420,AT5G20290,AT5G20950,AT5G21105,AT5G22650,AT5G25460…	GO:0030312
plastid	8.12781e-11	122	AT1G01080,AT1G02150,AT1G02280,AT1G04980,AT1G07320,AT1G08450,AT1G09340,AT1G12370,AT1G14410,AT1G16300,AT1G16720,AT1G17220,AT1G24450,AT1G27090,AT1G33330,AT1G48350,AT1G49750,AT1G63680,AT1G65260,AT1G66520,AT1G69200,AT1G73530,AT1G74000,AT1G74850,AT1G75350,AT1G76730,AT1G80030,AT2G02740,AT2G04530,AT2G10940,AT2G19730,AT2G19870,AT2G21660,AT2G22360,AT2G22870,AT2G23070,AT2G25110,AT2G32230,AT2G32920,AT2G33800…	GO:0009536
cytosol	1.11851e-10	115	AT1G04170,AT1G04980,AT1G06220,AT1G07320,AT1G09340,AT1G09760,AT1G10840,AT1G16300,AT1G20580,AT1G20960,AT1G23410,AT1G27090,AT1G31970,AT1G43170,AT1G48410,AT1G48920,AT1G49760,AT1G51510,AT1G62390,AT1G67680,AT1G70770,AT1G76810,AT2G05920,AT2G16430,AT2G19480,AT2G19520,AT2G19730,AT2G21390,AT2G21660,AT2G23070,AT2G23350,AT2G23420,AT2G27100,AT2G34160,AT2G36460,AT2G38025,AT2G38280,AT2G40290,AT2G42910,AT2G43030…	GO:0005829
catalytic step 2 spliceosome	5.22969e-10	17	AT1G04510,AT1G06220,AT1G10580,AT1G14650,AT1G20580,AT2G32600,AT2G43770,AT3G18790,AT3G19760,AT3G62840,AT4G02840,AT4G15900,AT4G21660,AT5G28740,AT5G41770,AT5G44500,AT5G64270	GO:0071013
chloroplast stroma	7.38546e-10	42	AT1G01080,AT1G07320,AT1G09340,AT1G14410,AT1G16300,AT1G16720,AT1G17220,AT1G48350,AT1G63680,AT1G65260,AT1G69200,AT1G74850,AT1G75350,AT2G02740,AT2G33800,AT2G35410,AT2G37220,AT2G38040,AT2G43030,AT2G47450,AT3G04260,AT3G10690,AT3G15190,AT3G22520,AT3G23700,AT3G25920,AT3G27850,AT3G48500,AT3G53460,AT3G54090,AT4G01310,AT4G09040,AT4G24770,AT5G13510,AT5G14320,AT5G14660,AT5G49910,AT5G51100,AT5G54600,AT5G64050…	GO:0009570
chloroplast nucleoid	9.1306e-10	12	AT1G14410,AT1G63680,AT1G65260,AT1G69200,AT1G74850,AT2G02740,AT3G04260,AT3G10690,AT3G48500,AT3G54090,AT5G51100,ATCG00180	GO:0042644
intracellular membrane-bounded organelle	9.37084e-10	240	AT1G01080,AT1G02150,AT1G02280,AT1G02840,AT1G04510,AT1G04980,AT1G06220,AT1G06760,AT1G07320,AT1G08450,AT1G09340,AT1G09760,AT1G10580,AT1G10840,AT1G12370,AT1G14410,AT1G14650,AT1G16300,AT1G16720,AT1G17220,AT1G18450,AT1G20580,AT1G20960,AT1G23410,AT1G24450,AT1G27090,AT1G29050,AT1G31970,AT1G33330,AT1G35140,AT1G43170,AT1G48160,AT1G48350,AT1G48410,AT1G48610,AT1G48620,AT1G48920,AT1G49670,AT1G49750,AT1G49760…	GO:0043231
plastid stroma	9.86816e-10	42	AT1G01080,AT1G07320,AT1G09340,AT1G14410,AT1G16300,AT1G16720,AT1G17220,AT1G48350,AT1G63680,AT1G65260,AT1G69200,AT1G74850,AT1G75350,AT2G02740,AT2G33800,AT2G35410,AT2G37220,AT2G38040,AT2G43030,AT2G47450,AT3G04260,AT3G10690,AT3G15190,AT3G22520,AT3G23700,AT3G25920,AT3G27850,AT3G48500,AT3G53460,AT3G54090,AT4G01310,AT4G09040,AT4G24770,AT5G13510,AT5G14320,AT5G14660,AT5G49910,AT5G51100,AT5G54600,AT5G64050…	GO:0009532
cytoplasm	1.48147e-09	228	AT1G01080,AT1G02150,AT1G02280,AT1G02840,AT1G04170,AT1G04510,AT1G04980,AT1G06220,AT1G07320,AT1G08450,AT1G09340,AT1G09760,AT1G10840,AT1G12370,AT1G14410,AT1G16300,AT1G16720,AT1G17220,AT1G18450,AT1G20580,AT1G20960,AT1G23410,AT1G24450,AT1G27090,AT1G29050,AT1G31970,AT1G33330,AT1G35140,AT1G43170,AT1G48160,AT1G48350,AT1G48410,AT1G48920,AT1G49670,AT1G49750,AT1G49760,AT1G51510,AT1G62390,AT1G63680,AT1G65260…	GO:0005737
intracellular organelle	2.07161e-09	241	AT1G01080,AT1G02150,AT1G02280,AT1G02840,AT1G04510,AT1G04980,AT1G06220,AT1G06760,AT1G07320,AT1G08450,AT1G09340,AT1G09760,AT1G10580,AT1G10840,AT1G12370,AT1G14410,AT1G14650,AT1G16300,AT1G16720,AT1G17220,AT1G18450,AT1G20580,AT1G20960,AT1G23410,AT1G24450,AT1G27090,AT1G29050,AT1G31970,AT1G33330,AT1G35140,AT1G43170,AT1G48160,AT1G48350,AT1G48410,AT1G48610,AT1G48620,AT1G48920,AT1G49670,AT1G49750,AT1G49760…	GO:0043229
membrane-bounded organelle	2.30686e-09	240	AT1G01080,AT1G02150,AT1G02280,AT1G02840,AT1G04510,AT1G04980,AT1G06220,AT1G06760,AT1G07320,AT1G08450,AT1G09340,AT1G09760,AT1G10580,AT1G10840,AT1G12370,AT1G14410,AT1G14650,AT1G16300,AT1G16720,AT1G17220,AT1G18450,AT1G20580,AT1G20960,AT1G23410,AT1G24450,AT1G27090,AT1G29050,AT1G31970,AT1G33330,AT1G35140,AT1G43170,AT1G48160,AT1G48350,AT1G48410,AT1G48610,AT1G48620,AT1G48920,AT1G49670,AT1G49750,AT1G49760…	GO:0043227
plastid nucleoid	2.56654e-09	12	AT1G14410,AT1G63680,AT1G65260,AT1G69200,AT1G74850,AT2G02740,AT3G04260,AT3G10690,AT3G48500,AT3G54090,AT5G51100,ATCG00180	GO:0042646
organelle	4.14716e-09	241	AT1G01080,AT1G02150,AT1G02280,AT1G02840,AT1G04510,AT1G04980,AT1G06220,AT1G06760,AT1G07320,AT1G08450,AT1G09340,AT1G09760,AT1G10580,AT1G10840,AT1G12370,AT1G14410,AT1G14650,AT1G16300,AT1G16720,AT1G17220,AT1G18450,AT1G20580,AT1G20960,AT1G23410,AT1G24450,AT1G27090,AT1G29050,AT1G31970,AT1G33330,AT1G35140,AT1G43170,AT1G48160,AT1G48350,AT1G48410,AT1G48610,AT1G48620,AT1G48920,AT1G49670,AT1G49750,AT1G49760…	GO:0043226
intracellular anatomical structure	6.86736e-09	257	AT1G01080,AT1G02150,AT1G02280,AT1G02840,AT1G04170,AT1G04510,AT1G04980,AT1G06220,AT1G06760,AT1G07320,AT1G08450,AT1G09340,AT1G09760,AT1G10580,AT1G10840,AT1G12370,AT1G14410,AT1G14650,AT1G16300,AT1G16720,AT1G17220,AT1G18450,AT1G20580,AT1G20960,AT1G23410,AT1G24450,AT1G27090,AT1G29050,AT1G31970,AT1G33330,AT1G35140,AT1G43170,AT1G48160,AT1G48350,AT1G48410,AT1G48610,AT1G48620,AT1G48920,AT1G49670,AT1G49750…	GO:0005622
nucleoid	1.03139e-08	12	AT1G14410,AT1G63680,AT1G65260,AT1G69200,AT1G74850,AT2G02740,AT3G04260,AT3G10690,AT3G48500,AT3G54090,AT5G51100,ATCG00180	GO:0009295
chloroplast	2.40394e-07	101	AT1G01080,AT1G02150,AT1G02280,AT1G04980,AT1G07320,AT1G08450,AT1G09340,AT1G12370,AT1G14410,AT1G16300,AT1G16720,AT1G17220,AT1G24450,AT1G27090,AT1G33330,AT1G48350,AT1G49750,AT1G63680,AT1G65260,AT1G66520,AT1G69200,AT1G73530,AT1G74000,AT1G74850,AT1G75350,AT1G76730,AT1G80030,AT2G02740,AT2G04530,AT2G10940,AT2G19730,AT2G19870,AT2G21660,AT2G22360,AT2G22870,AT2G23070,AT2G25110,AT2G32230,AT2G32920,AT2G33800…	GO:0009507
ribosome	2.79036e-07	28	AT1G07320,AT1G09340,AT1G10840,AT1G23410,AT1G43170,AT1G48350,AT1G75350,AT2G19730,AT2G33800,AT2G43030,AT3G09200,AT3G09840,AT3G15190,AT3G18080,AT3G25920,AT3G27850,AT3G53430,AT4G01310,AT4G08350,AT5G13510,AT5G14320,AT5G20290,AT5G25980,AT5G27770,AT5G54600,AT5G62300,AT5G66860,ATCG00820	GO:0005840
spliceosomal snRNP complex	6.31321e-07	13	AT1G06220,AT1G14650,AT1G20580,AT2G18740,AT2G32600,AT2G47580,AT3G50670,AT3G55220,AT3G62840,AT4G02840,AT4G21660,AT5G44500,AT5G64270	GO:0097525
small nuclear ribonucleoprotein complex	7.5043e-07	13	AT1G06220,AT1G14650,AT1G20580,AT2G18740,AT2G32600,AT2G47580,AT3G50670,AT3G55220,AT3G62840,AT4G02840,AT4G21660,AT5G44500,AT5G64270	GO:0030532
U2 snRNP	1.38029e-06	10	AT1G14650,AT1G20580,AT2G18740,AT2G32600,AT3G55220,AT3G62840,AT4G02840,AT4G21660,AT5G44500,AT5G64270	GO:0005686
Sm-like protein family complex	1.70891e-06	13	AT1G06220,AT1G14650,AT1G20580,AT2G18740,AT2G32600,AT2G47580,AT3G50670,AT3G55220,AT3G62840,AT4G02840,AT4G21660,AT5G44500,AT5G64270	GO:0120114
cell-cell junction	4.53993e-06	41	AT1G09340,AT1G23410,AT1G28290,AT1G43170,AT1G70770,AT1G71695,AT2G05920,AT2G10940,AT2G16430,AT2G19730,AT2G21660,AT2G33530,AT2G34040,AT2G36460,AT2G41475,AT2G42910,AT3G09200,AT3G09840,AT3G20820,AT3G44110,AT3G55220,AT3G55430,AT3G60190,AT4G13340,AT4G22010,AT4G26100,AT4G34450,AT4G39640,AT5G09440,AT5G20290,AT5G20950,AT5G21105,AT5G22060,AT5G25460,AT5G25980,AT5G27120,AT5G42020,AT5G42080,AT5G44400,AT5G60390…	GO:0005911
plasmodesma	4.53993e-06	41	AT1G09340,AT1G23410,AT1G28290,AT1G43170,AT1G70770,AT1G71695,AT2G05920,AT2G10940,AT2G16430,AT2G19730,AT2G21660,AT2G33530,AT2G34040,AT2G36460,AT2G41475,AT2G42910,AT3G09200,AT3G09840,AT3G20820,AT3G44110,AT3G55220,AT3G55430,AT3G60190,AT4G13340,AT4G22010,AT4G26100,AT4G34450,AT4G39640,AT5G09440,AT5G20290,AT5G20950,AT5G21105,AT5G22060,AT5G25460,AT5G25980,AT5G27120,AT5G42020,AT5G42080,AT5G44400,AT5G60390…	GO:0009506
cell junction	4.53993e-06	41	AT1G09340,AT1G23410,AT1G28290,AT1G43170,AT1G70770,AT1G71695,AT2G05920,AT2G10940,AT2G16430,AT2G19730,AT2G21660,AT2G33530,AT2G34040,AT2G36460,AT2G41475,AT2G42910,AT3G09200,AT3G09840,AT3G20820,AT3G44110,AT3G55220,AT3G55430,AT3G60190,AT4G13340,AT4G22010,AT4G26100,AT4G34450,AT4G39640,AT5G09440,AT5G20290,AT5G20950,AT5G21105,AT5G22060,AT5G25460,AT5G25980,AT5G27120,AT5G42020,AT5G42080,AT5G44400,AT5G60390…	GO:0030054
anchoring junction	4.53993e-06	41	AT1G09340,AT1G23410,AT1G28290,AT1G43170,AT1G70770,AT1G71695,AT2G05920,AT2G10940,AT2G16430,AT2G19730,AT2G21660,AT2G33530,AT2G34040,AT2G36460,AT2G41475,AT2G42910,AT3G09200,AT3G09840,AT3G20820,AT3G44110,AT3G55220,AT3G55430,AT3G60190,AT4G13340,AT4G22010,AT4G26100,AT4G34450,AT4G39640,AT5G09440,AT5G20290,AT5G20950,AT5G21105,AT5G22060,AT5G25460,AT5G25980,AT5G27120,AT5G42020,AT5G42080,AT5G44400,AT5G60390…	GO:0070161
symplast	4.65897e-06	41	AT1G09340,AT1G23410,AT1G28290,AT1G43170,AT1G70770,AT1G71695,AT2G05920,AT2G10940,AT2G16430,AT2G19730,AT2G21660,AT2G33530,AT2G34040,AT2G36460,AT2G41475,AT2G42910,AT3G09200,AT3G09840,AT3G20820,AT3G44110,AT3G55220,AT3G55430,AT3G60190,AT4G13340,AT4G22010,AT4G26100,AT4G34450,AT4G39640,AT5G09440,AT5G20290,AT5G20950,AT5G21105,AT5G22060,AT5G25460,AT5G25980,AT5G27120,AT5G42020,AT5G42080,AT5G44400,AT5G60390…	GO:0055044
nuclear protein-containing complex	8.10417e-06	37	AT1G02840,AT1G04510,AT1G06220,AT1G10580,AT1G14650,AT1G18450,AT1G20580,AT1G20960,AT1G51510,AT1G73720,AT1G77180,AT2G18510,AT2G18740,AT2G19520,AT2G32600,AT2G43770,AT2G47580,AT3G10690,AT3G18790,AT3G19760,AT3G28730,AT3G49430,AT3G50670,AT3G55220,AT3G62840,AT4G02840,AT4G08350,AT4G15900,AT4G21660,AT5G14170,AT5G22330,AT5G28740,AT5G41770,AT5G42020,AT5G44500,AT5G64270,AT5G67630	GO:0140513
nucleoplasm	2.63867e-05	23	AT1G02840,AT1G06220,AT1G09760,AT1G18450,AT1G51510,AT1G73720,AT1G77180,AT2G19520,AT2G19730,AT2G27100,AT3G13224,AT3G18990,AT3G19760,AT3G28730,AT3G49430,AT3G50670,AT4G02840,AT4G08350,AT4G32720,AT5G02530,AT5G22330,AT5G59950,AT5G67630	GO:0005654
plastid chromosome	3.34935e-05	6	AT1G14410,AT1G65260,AT1G74850,AT2G02740,AT3G04260,AT3G48500	GO:0009508
U1 snRNP	7.58715e-05	7	AT1G20580,AT2G18740,AT2G47580,AT3G50670,AT3G62840,AT4G02840,AT5G44500	GO:0005685
eukaryotic translation initiation factor 2 complex	0.00013857	4	AT1G04170,AT2G40290,AT5G05470,AT5G20920	GO:0005850
U2-type spliceosomal complex	0.000254055	12	AT1G04510,AT1G06220,AT1G14650,AT1G20580,AT2G32600,AT3G50670,AT4G02840,AT4G21660,AT5G28740,AT5G41770,AT5G44500,AT5G64270	GO:0005684
nuclear speck	0.00027912	10	AT1G02840,AT1G06220,AT1G51510,AT1G73720,AT1G77180,AT2G27100,AT3G19760,AT3G49430,AT3G50670,AT4G02840	GO:0016607
nuclear body	0.00065174	11	AT1G02840,AT1G06220,AT1G09760,AT1G51510,AT1G73720,AT1G77180,AT2G27100,AT3G19760,AT3G49430,AT3G50670,AT4G02840	GO:0016604
chromosome	0.00177398	18	AT1G06760,AT1G14410,AT1G18450,AT1G48620,AT1G65260,AT1G74850,AT2G02740,AT2G19480,AT3G04260,AT3G10690,AT3G18035,AT3G28730,AT3G48500,AT4G26110,AT4G35570,AT5G14170,AT5G22330,AT5G67630	GO:0005694
cytosolic ribosome	0.0028522	16	AT1G07320,AT1G23410,AT1G43170,AT2G19730,AT3G09200,AT3G09840,AT3G18080,AT3G25920,AT3G53430,AT4G01310,AT5G13510,AT5G20290,AT5G25980,AT5G27770,AT5G62300,AT5G66860	GO:0022626
ribosomal subunit	0.0028522	17	AT1G07320,AT1G23410,AT1G43170,AT2G19730,AT2G33800,AT3G09200,AT3G15190,AT3G25920,AT3G27850,AT3G53430,AT5G13510,AT5G14320,AT5G20290,AT5G27770,AT5G62300,AT5G66860,ATCG00820	GO:0044391
nucleus	0.00420899	138	AT1G01080,AT1G02840,AT1G04510,AT1G04980,AT1G06220,AT1G06760,AT1G07320,AT1G09760,AT1G10580,AT1G10840,AT1G12370,AT1G14410,AT1G14650,AT1G17220,AT1G18450,AT1G20580,AT1G20960,AT1G23410,AT1G24450,AT1G27090,AT1G31970,AT1G33330,AT1G43170,AT1G48160,AT1G48350,AT1G48410,AT1G48610,AT1G48620,AT1G48920,AT1G49670,AT1G49750,AT1G49760,AT1G51510,AT1G62390,AT1G65260,AT1G65590,AT1G70770,AT1G72710,AT1G73720,AT1G76110…	GO:0005634
extracellular region	0.00669718	62	AT1G02280,AT1G04170,AT1G04510,AT1G06220,AT1G07320,AT1G08450,AT1G09340,AT1G10580,AT1G10840,AT1G14410,AT1G20190,AT1G28290,AT1G33811,AT1G35140,AT1G55210,AT1G65870,AT1G69530,AT1G71695,AT1G72610,AT1G72970,AT1G78820,AT2G05920,AT2G10940,AT2G16430,AT2G24420,AT2G33530,AT2G34810,AT2G41475,AT2G45180,AT2G45220,AT3G12700,AT3G13224,AT3G13790,AT3G18080,AT3G20820,AT3G22060,AT3G44990,AT3G52500,AT3G55430,AT4G08950…	GO:0005576
signal recognition particle, endoplasmic reticulum targeting	0.0085128	4	AT1G48160,AT1G67680,AT2G47450,AT5G61970	GO:0005786
chloroplast envelope	0.00972871	28	AT1G01080,AT1G02280,AT1G09340,AT1G16720,AT1G17220,AT1G48350,AT1G65260,AT1G75350,AT1G80030,AT2G22360,AT2G37220,AT2G38040,AT2G43030,AT2G47450,AT3G15190,AT3G22520,AT3G25920,AT4G01310,AT4G24770,AT4G39960,AT5G10160,AT5G13510,AT5G14320,AT5G17170,AT5G22830,AT5G49910,AT5G54600,ATCG00820	GO:0009941
chromatin	0.0113762	11	AT1G06760,AT1G18450,AT1G48620,AT2G19480,AT3G18035,AT3G28730,AT4G26110,AT4G35570,AT5G14170,AT5G22330,AT5G67630	GO:0000785
signal recognition particle	0.0125977	4	AT1G48160,AT1G67680,AT2G47450,AT5G61970	GO:0048500
precatalytic spliceosome	0.0153018	6	AT1G20580,AT1G73720,AT2G18740,AT3G62840,AT4G02840,AT4G21660	GO:0071011
plastid envelope	0.0205469	35	AT1G01080,AT1G02280,AT1G07320,AT1G09340,AT1G16720,AT1G17220,AT1G48350,AT1G65260,AT1G75350,AT1G80030,AT2G10940,AT2G22360,AT2G33800,AT2G37220,AT2G38040,AT2G43030,AT2G45180,AT2G47450,AT3G15190,AT3G22520,AT3G25920,AT3G27850,AT3G53460,AT4G01310,AT4G24770,AT4G39960,AT5G10160,AT5G13510,AT5G14320,AT5G17170,AT5G22830,AT5G42080,AT5G49910,AT5G54600,ATCG00820	GO:0009526
plant-type cell wall	0.0284499	27	AT1G04980,AT1G06220,AT1G28290,AT1G35140,AT1G43170,AT1G69530,AT1G71695,AT1G74000,AT2G16430,AT2G19730,AT2G33530,AT3G09840,AT3G18080,AT3G44110,AT3G52500,AT4G08950,AT4G13340,AT4G32720,AT5G10160,AT5G11420,AT5G20290,AT5G20950,AT5G22650,AT5G25460,AT5G42020,AT5G62300,AT5G64260	GO:0009505
U5 snRNP	0.033534	5	AT1G20580,AT2G18740,AT3G62840,AT4G02840,AT5G44500	GO:0005682
COPI vesicle coat	0.033534	4	AT2G21390,AT3G15980,AT4G31490,AT4G34450	GO:0030126
COPI-coated vesicle membrane	0.033534	4	AT2G21390,AT3G15980,AT4G31490,AT4G34450	GO:0030663
plastid large ribosomal subunit	0.0410622	3	AT1G07320,AT3G25920,AT3G27850	GO:0000311
COPI-coated vesicle	0.0440643	4	AT2G21390,AT3G15980,AT4G31490,AT4G34450	GO:0030137
His6-Myc-Csy4* all negative
GO MF	p-value	number	AGIs	GO
mRNA binding	4.37714e-56	118	AT1G01320,AT1G05190,AT1G11860,AT1G12770,AT1G12900,AT1G12920,AT1G13270,AT1G15820,AT1G18080,AT1G30360,AT1G31330,AT1G33140,AT1G42970,AT1G44575,AT1G48830,AT1G54780,AT1G55490,AT1G56070,AT1G62750,AT1G67090,AT1G67700,AT1G68010,AT1G72370,AT1G73180,AT2G37270,AT2G39010,AT2G39730,AT2G42520,AT3G01500,AT3G02080,AT3G08580,AT3G08940,AT3G09440,AT3G11510,AT3G12780,AT3G13920,AT3G14310,AT3G14420,AT3G26060,AT3G26650…	GO:0003729
RNA binding	8.03825e-49	144	AT1G01320,AT1G05190,AT1G09150,AT1G09640,AT1G11860,AT1G12770,AT1G12900,AT1G12920,AT1G13270,AT1G15820,AT1G17690,AT1G18080,AT1G20020,AT1G30230,AT1G30360,AT1G31330,AT1G32990,AT1G33140,AT1G42970,AT1G44575,AT1G48830,AT1G48900,AT1G54780,AT1G55490,AT1G56070,AT1G56110,AT1G57720,AT1G62750,AT1G65440,AT1G67090,AT1G67700,AT1G68010,AT1G72370,AT1G73180,AT1G80070,AT2G33730,AT2G37270,AT2G39010,AT2G39730,AT2G39990…	GO:0003723
protein domain specific binding	3.46596e-18	21	AT1G31330,AT1G32060,AT1G44575,AT1G55490,AT2G05100,AT2G28800,AT3G26650,AT3G47470,AT3G54890,AT4G02770,AT4G10340,AT4G12800,AT4G27440,AT4G28750,AT4G34620,AT5G01530,AT5G03940,AT5G38420,AT5G54270,AT5G64040,AT5G66190	GO:0019904
heterocyclic compound binding	7.37945e-18	223	AT1G01320,AT1G05190,AT1G08520,AT1G09150,AT1G09640,AT1G11860,AT1G12770,AT1G12900,AT1G12920,AT1G13270,AT1G13440,AT1G15820,AT1G17690,AT1G18080,AT1G20020,AT1G24360,AT1G24510,AT1G29900,AT1G30230,AT1G30360,AT1G31330,AT1G32060,AT1G32990,AT1G33140,AT1G42970,AT1G44575,AT1G48830,AT1G48850,AT1G48900,AT1G52740,AT1G54780,AT1G55490,AT1G56070,AT1G56110,AT1G57720,AT1G58290,AT1G62750,AT1G65440,AT1G67090,AT1G67700…	GO:1901363
organic cyclic compound binding	1.20035e-17	225	AT1G01320,AT1G05190,AT1G08520,AT1G09150,AT1G09640,AT1G11860,AT1G12770,AT1G12900,AT1G12920,AT1G13270,AT1G13440,AT1G15820,AT1G17690,AT1G18080,AT1G20020,AT1G24360,AT1G24510,AT1G29900,AT1G30230,AT1G30360,AT1G31330,AT1G32060,AT1G32990,AT1G33140,AT1G42970,AT1G44575,AT1G48830,AT1G48850,AT1G48900,AT1G52740,AT1G54780,AT1G55490,AT1G56070,AT1G56110,AT1G57720,AT1G58290,AT1G62750,AT1G65440,AT1G67090,AT1G67700…	GO:0097159
nucleic acid binding	6.34805e-17	162	AT1G01320,AT1G05190,AT1G09150,AT1G09640,AT1G11860,AT1G12770,AT1G12900,AT1G12920,AT1G13270,AT1G13440,AT1G15820,AT1G17690,AT1G18080,AT1G20020,AT1G30230,AT1G30360,AT1G31330,AT1G32990,AT1G33140,AT1G42970,AT1G44575,AT1G48830,AT1G48900,AT1G52740,AT1G54780,AT1G55490,AT1G56070,AT1G56110,AT1G57720,AT1G62750,AT1G65440,AT1G67090,AT1G67700,AT1G68010,AT1G72370,AT1G73180,AT1G80070,AT2G15430,AT2G20280,AT2G27170…	GO:0003676
chlorophyll binding	2.77142e-14	15	AT1G15820,AT1G44575,AT2G05100,AT3G08940,AT3G47470,AT3G54890,AT4G10340,AT5G01530,AT5G54270,ATCG00020,ATCG00270,ATCG00280,ATCG00340,ATCG00350,ATCG00680	GO:0016168
translation factor activity, RNA binding	1.05252e-07	19	AT1G09640,AT1G12920,AT1G30230,AT1G56070,AT1G57720,AT1G62750,AT1G65440,AT1G73180,AT2G39990,AT2G46280,AT3G13920,AT3G57290,AT4G11420,AT4G20360,AT4G29060,AT4G33250,AT5G19510,AT5G25757,AT5G27640	GO:0008135
translation regulator activity, nucleic acid binding	2.65405e-07	19	AT1G09640,AT1G12920,AT1G30230,AT1G56070,AT1G57720,AT1G62750,AT1G65440,AT1G73180,AT2G39990,AT2G46280,AT3G13920,AT3G57290,AT4G11420,AT4G20360,AT4G29060,AT4G33250,AT5G19510,AT5G25757,AT5G27640	GO:0090079
translation regulator activity	3.69882e-07	19	AT1G09640,AT1G12920,AT1G30230,AT1G56070,AT1G57720,AT1G62750,AT1G65440,AT1G73180,AT2G39990,AT2G46280,AT3G13920,AT3G57290,AT4G11420,AT4G20360,AT4G29060,AT4G33250,AT5G19510,AT5G25757,AT5G27640	GO:0045182
electron transporter, transferring electrons within the cyclic electron transport pathway of photosynthesis activity	6.48064e-07	7	AT4G05180,AT4G21280,AT5G66190,ATCG00020,ATCG00270,ATCG00280,ATCG00680	GO:0045156
ligase activity	6.38308e-06	23	AT1G08520,AT1G29900,AT2G04842,AT2G40660,AT3G02760,AT3G04600,AT3G11710,AT3G62120,AT4G04640,AT4G10320,AT4G26870,AT4G31180,AT5G08690,AT5G26710,AT5G26830,AT5G35630,AT5G45930,ATCG00120,ATCG00130,ATCG00470,ATCG00480,ATCG00500,ATMG01190	GO:0016874
binding	1.28044e-05	273	AT1G01320,AT1G04190,AT1G05190,AT1G06950,AT1G08520,AT1G09150,AT1G09560,AT1G09640,AT1G11860,AT1G12770,AT1G12900,AT1G12920,AT1G13270,AT1G13440,AT1G14850,AT1G15820,AT1G17690,AT1G18080,AT1G20020,AT1G22700,AT1G24360,AT1G24510,AT1G29900,AT1G30230,AT1G30360,AT1G31330,AT1G31690,AT1G32060,AT1G32990,AT1G33140,AT1G41830,AT1G42970,AT1G44575,AT1G48830,AT1G48850,AT1G48900,AT1G52740,AT1G54780,AT1G55490,AT1G56070…	GO:0005488
copper ion binding	2.91624e-05	19	AT1G13440,AT1G24360,AT1G31690,AT1G41830,AT1G56070,AT1G57720,AT1G67090,AT3G08580,AT3G15020,AT3G16430,AT3G52930,AT4G13940,AT4G20260,AT5G08690,AT5G17920,AT5G20720,AT5G63400,AT5G66920,ATMG01190	GO:0005507
poly(U) RNA binding	4.3903e-05	8	AT1G20020,AT1G68010,AT3G50820,AT3G63140,AT4G37930,AT5G08690,AT5G66190,AT5G66570	GO:0008266
aminoacyl-tRNA ligase activity	6.63311e-05	11	AT2G04842,AT2G40660,AT3G02760,AT3G04600,AT3G11710,AT3G62120,AT4G10320,AT4G26870,AT4G31180,AT5G26710,AT5G26830	GO:0004812
ligase activity, forming carbon-oxygen bonds	6.63311e-05	11	AT2G04842,AT2G40660,AT3G02760,AT3G04600,AT3G11710,AT3G62120,AT4G10320,AT4G26870,AT4G31180,AT5G26710,AT5G26830	GO:0016875
poly-pyrimidine tract binding	0.000154154	8	AT1G20020,AT1G68010,AT3G50820,AT3G63140,AT4G37930,AT5G08690,AT5G66190,AT5G66570	GO:0008187
unfolded protein binding	0.000181274	13	AT1G24510,AT3G03960,AT3G09440,AT3G11830,AT3G18190,AT3G20050,AT4G24190,AT4G24280,AT5G02500,AT5G20720,AT5G20890,AT5G26360,AT5G56030	GO:0051082
fructose-bisphosphate aldolase activity	0.000343491	5	AT2G01140,AT2G21330,AT3G52930,AT4G26530,AT4G38970	GO:0004332
proton-transporting ATP synthase activity, rotational mechanism	0.000397099	7	AT4G04640,AT5G08690,ATCG00120,ATCG00130,ATCG00470,ATCG00480,ATMG01190	GO:0046933
proton channel activity	0.000551666	7	AT4G04640,AT5G08690,ATCG00120,ATCG00130,ATCG00470,ATCG00480,ATMG01190	GO:0015252
translation elongation factor activity	0.000864413	9	AT1G09640,AT1G30230,AT1G56070,AT1G57720,AT1G62750,AT1G65440,AT4G20360,AT4G29060,AT5G19510	GO:0003746
oxygen evolving activity	0.00174365	4	AT3G50820,AT5G66570,ATCG00020,ATCG00270	GO:0010242
rRNA binding	0.00252655	14	AT1G05190,AT1G17690,AT1G32990,AT1G33140,AT2G37270,AT3G11510,AT3G44890,AT3G52150,AT3G63140,AT3G63490,AT4G09800,AT5G45775,ATCG00780,ATCG00800	GO:0019843
nucleotide binding	0.00409617	91	AT1G08520,AT1G12770,AT1G12900,AT1G13440,AT1G24360,AT1G24510,AT1G29900,AT1G32060,AT1G42970,AT1G48850,AT1G48900,AT1G55490,AT1G56070,AT1G58290,AT1G62750,AT1G68010,AT1G68830,AT2G04842,AT2G27170,AT2G28000,AT2G30950,AT2G33730,AT2G39730,AT2G42520,AT3G02760,AT3G03960,AT3G04600,AT3G06860,AT3G09440,AT3G11710,AT3G11830,AT3G12780,AT3G13920,AT3G14420,AT3G18190,AT3G19820,AT3G20050,AT3G26650,AT3G54540,AT3G54670…	GO:0000166
nucleoside phosphate binding	0.00409617	91	AT1G08520,AT1G12770,AT1G12900,AT1G13440,AT1G24360,AT1G24510,AT1G29900,AT1G32060,AT1G42970,AT1G48850,AT1G48900,AT1G55490,AT1G56070,AT1G58290,AT1G62750,AT1G68010,AT1G68830,AT2G04842,AT2G27170,AT2G28000,AT2G30950,AT2G33730,AT2G39730,AT2G42520,AT3G02760,AT3G03960,AT3G04600,AT3G06860,AT3G09440,AT3G11710,AT3G11830,AT3G12780,AT3G13920,AT3G14420,AT3G18190,AT3G19820,AT3G20050,AT3G26650,AT3G54540,AT3G54670…	GO:1901265
catalytic activity, acting on a tRNA	0.00459879	13	AT1G18440,AT1G58290,AT2G04842,AT2G40660,AT3G02760,AT3G04600,AT3G11710,AT3G62120,AT4G10320,AT4G26870,AT4G31180,AT5G26710,AT5G26830	GO:0140101
small molecule binding	0.00525629	98	AT1G08520,AT1G12770,AT1G12900,AT1G13440,AT1G24360,AT1G24510,AT1G29900,AT1G32060,AT1G42970,AT1G48850,AT1G48900,AT1G55490,AT1G56070,AT1G58290,AT1G62750,AT1G67090,AT1G68010,AT1G68830,AT1G72150,AT2G04842,AT2G17630,AT2G27170,AT2G28000,AT2G30950,AT2G33730,AT2G39730,AT2G42520,AT3G02760,AT3G03960,AT3G04600,AT3G06860,AT3G09440,AT3G11630,AT3G11710,AT3G11830,AT3G12780,AT3G13920,AT3G14420,AT3G18190,AT3G19820…	GO:0036094
structural molecule activity	0.0112106	26	AT1G05190,AT1G14850,AT1G18080,AT1G32990,AT1G33140,AT1G48830,AT1G72370,AT2G37270,AT3G02080,AT3G11510,AT3G44890,AT3G53870,AT3G63490,AT4G09800,AT4G25740,AT4G27090,AT4G34620,AT5G16130,AT5G19780,AT5G30510,AT5G41520,AT5G45775,AT5G59370,AT5G62700,ATCG00780,ATCG00800	GO:0005198
glyceraldehyde-3-phosphate dehydrogenase (NAD+) (phosphorylating) activity	0.0118285	4	AT1G12900,AT1G13440,AT1G42970,AT3G26650	GO:0004365
glyceraldehyde-3-phosphate dehydrogenase (NAD(P)+) (phosphorylating) activity	0.0118285	4	AT1G12900,AT1G13440,AT1G42970,AT3G26650	GO:0043891
structural constituent of ribosome	0.0171796	22	AT1G05190,AT1G18080,AT1G32990,AT1G33140,AT1G48830,AT1G72370,AT2G37270,AT3G02080,AT3G11510,AT3G44890,AT3G53870,AT3G63490,AT4G09800,AT4G25740,AT4G27090,AT4G34620,AT5G16130,AT5G30510,AT5G41520,AT5G45775,ATCG00780,ATCG00800	GO:0003735
glyceraldehyde-3-phosphate dehydrogenase (NADP+) (phosphorylating) activity	0.0194057	3	AT1G12900,AT1G42970,AT3G26650	GO:0047100
electron transfer activity	0.0268098	12	AT4G03280,AT4G05180,AT4G21280,AT5G66190,ATCG00020,ATCG00270,ATCG00280,ATCG00340,ATCG00350,ATCG00540,ATCG00680,ATCG00720	GO:0009055
purine ribonucleoside triphosphate binding	0.0304891	78	AT1G08520,AT1G12770,AT1G24510,AT1G29900,AT1G32060,AT1G48900,AT1G55490,AT1G56070,AT1G62750,AT1G68830,AT2G04842,AT2G27170,AT2G28000,AT2G30950,AT2G33730,AT2G39730,AT2G42520,AT3G02760,AT3G03960,AT3G04600,AT3G09440,AT3G11710,AT3G11830,AT3G12780,AT3G13920,AT3G18190,AT3G20050,AT3G54540,AT3G54670,AT3G57560,AT3G58510,AT3G62120,AT3G62290,AT4G02510,AT4G10320,AT4G11010,AT4G20360,AT4G24190,AT4G24280,AT4G26870…	GO:0035639
NAD binding	0.0443778	9	AT1G12900,AT1G13440,AT1G24360,AT1G42970,AT1G68010,AT3G06860,AT3G26650,AT4G29010,AT4G34200	GO:0051287
anion binding	0.0487146	97	AT1G08520,AT1G12770,AT1G12900,AT1G13440,AT1G24510,AT1G29900,AT1G32060,AT1G42970,AT1G48850,AT1G48900,AT1G55490,AT1G56070,AT1G62750,AT1G67090,AT1G68830,AT1G72150,AT2G04842,AT2G17630,AT2G27170,AT2G28000,AT2G30950,AT2G33730,AT2G39730,AT2G42520,AT3G02760,AT3G03960,AT3G04600,AT3G06860,AT3G09440,AT3G11630,AT3G11710,AT3G11830,AT3G12780,AT3G13920,AT3G14420,AT3G18190,AT3G19820,AT3G20050,AT3G26650,AT3G54540…	GO:0043168
GO BP	p-value	number	AGIs	GO
photosynthesis	9.75988e-39	56	AT1G03630,AT1G08520,AT1G12900,AT1G15820,AT1G15980,AT1G20020,AT1G22700,AT1G31330,AT1G32060,AT1G42970,AT1G44575,AT1G54780,AT1G67090,AT1G68830,AT1G74470,AT2G05100,AT2G30950,AT3G01500,AT3G08940,AT3G12780,AT3G26650,AT3G47470,AT3G50820,AT3G54050,AT3G54890,AT3G56940,AT3G60750,AT4G01050,AT4G02770,AT4G03280,AT4G04640,AT4G05180,AT4G10340,AT4G12800,AT4G21280,AT4G27440,AT4G28750,AT5G01530,AT5G01920,AT5G38420…	GO:0015979
generation of precursor metabolites and energy	2.45232e-21	51	AT1G13440,AT1G15820,AT1G15980,AT1G22700,AT1G54780,AT1G68830,AT2G01140,AT2G05100,AT2G21330,AT2G30950,AT2G42790,AT3G08940,AT3G12780,AT3G15020,AT3G47470,AT3G50820,AT3G52930,AT3G54050,AT3G54890,AT3G55410,AT3G60750,AT4G01050,AT4G03280,AT4G04640,AT4G05180,AT4G10340,AT4G21280,AT4G26530,AT4G29220,AT4G38970,AT5G01530,AT5G01920,AT5G08690,AT5G09660,AT5G19220,AT5G42270,AT5G48300,AT5G54270,AT5G64040,AT5G66190…	GO:0006091
photosynthesis, light reaction	4.45066e-18	32	AT1G15820,AT1G15980,AT1G22700,AT1G54780,AT1G68830,AT2G05100,AT2G30950,AT3G08940,AT3G47470,AT3G50820,AT3G54050,AT3G54890,AT4G01050,AT4G03280,AT4G04640,AT4G05180,AT4G10340,AT4G21280,AT5G01530,AT5G01920,AT5G42270,AT5G54270,AT5G64040,AT5G66190,AT5G66570,ATCG00020,ATCG00270,ATCG00280,ATCG00340,ATCG00540,ATCG00680,ATCG00720	GO:0019684
organonitrogen compound biosynthetic process	2.28e-15	85	AT1G03630,AT1G05190,AT1G08520,AT1G09150,AT1G11580,AT1G12920,AT1G18080,AT1G29900,AT1G30230,AT1G32990,AT1G33140,AT1G48830,AT1G48850,AT1G56070,AT1G58290,AT1G62750,AT1G72370,AT1G74470,AT2G01720,AT2G04842,AT2G17630,AT2G20280,AT2G31810,AT2G37270,AT2G39990,AT2G46280,AT3G02080,AT3G02200,AT3G02760,AT3G04600,AT3G11510,AT3G11710,AT3G13920,AT3G14110,AT3G44890,AT3G53870,AT3G56940,AT3G57290,AT3G57560,AT3G62120…	GO:1901566
response to cadmium ion	1.81828e-13	33	AT1G11860,AT1G13440,AT1G18080,AT1G42970,AT1G57720,AT1G68560,AT2G01140,AT2G17630,AT2G21330,AT2G46280,AT2G47470,AT3G09440,AT3G11830,AT3G12780,AT3G18190,AT3G52930,AT3G60750,AT4G10320,AT4G24190,AT4G24280,AT4G26870,AT4G29060,AT4G31180,AT4G37930,AT4G38970,AT5G02500,AT5G07350,AT5G17920,AT5G20720,AT5G35630,AT5G61780,AT5G63400,ATCG00490	GO:0046686
photosynthetic electron transport chain	5.76008e-13	18	AT1G15980,AT2G30950,AT3G50820,AT3G54050,AT4G01050,AT4G03280,AT4G04640,AT4G05180,AT4G21280,AT5G42270,AT5G64040,AT5G66190,AT5G66570,ATCG00020,ATCG00270,ATCG00280,ATCG00540,ATCG00680	GO:0009767
translation	4.62923e-12	50	AT1G05190,AT1G09150,AT1G11580,AT1G12920,AT1G18080,AT1G30230,AT1G32990,AT1G33140,AT1G48830,AT1G56070,AT1G62750,AT1G72370,AT2G04842,AT2G20280,AT2G37270,AT2G39990,AT2G46280,AT3G02080,AT3G02200,AT3G02760,AT3G04600,AT3G11510,AT3G11710,AT3G13920,AT3G44890,AT3G53870,AT3G57290,AT3G62120,AT3G63140,AT3G63490,AT4G09800,AT4G10320,AT4G11420,AT4G20360,AT4G26870,AT4G27090,AT4G29060,AT4G31180,AT4G33250,AT4G34620…	GO:0006412
peptide biosynthetic process	6.22302e-12	50	AT1G05190,AT1G09150,AT1G11580,AT1G12920,AT1G18080,AT1G30230,AT1G32990,AT1G33140,AT1G48830,AT1G56070,AT1G62750,AT1G72370,AT2G04842,AT2G20280,AT2G37270,AT2G39990,AT2G46280,AT3G02080,AT3G02200,AT3G02760,AT3G04600,AT3G11510,AT3G11710,AT3G13920,AT3G44890,AT3G53870,AT3G57290,AT3G62120,AT3G63140,AT3G63490,AT4G09800,AT4G10320,AT4G11420,AT4G20360,AT4G26870,AT4G27090,AT4G29060,AT4G31180,AT4G33250,AT4G34620…	GO:0043043
amide biosynthetic process	1.02943e-11	52	AT1G05190,AT1G09150,AT1G11580,AT1G12920,AT1G18080,AT1G30230,AT1G32990,AT1G33140,AT1G48830,AT1G56070,AT1G62750,AT1G72370,AT2G04842,AT2G20280,AT2G37270,AT2G39990,AT2G46280,AT3G02080,AT3G02200,AT3G02760,AT3G04600,AT3G11510,AT3G11710,AT3G13920,AT3G44890,AT3G53870,AT3G57290,AT3G62120,AT3G63140,AT3G63490,AT4G09800,AT4G10320,AT4G11420,AT4G20360,AT4G26870,AT4G27090,AT4G29060,AT4G31180,AT4G33250,AT4G34620…	GO:0043604
peptide metabolic process	2.79899e-11	53	AT1G05190,AT1G09150,AT1G09640,AT1G11580,AT1G12920,AT1G18080,AT1G30230,AT1G32990,AT1G33140,AT1G48830,AT1G56070,AT1G57720,AT1G62750,AT1G72370,AT2G04842,AT2G20280,AT2G37270,AT2G39990,AT2G46280,AT3G02080,AT3G02200,AT3G02760,AT3G04600,AT3G11510,AT3G11710,AT3G13920,AT3G44890,AT3G53870,AT3G57290,AT3G62120,AT3G63140,AT3G63490,AT4G09800,AT4G10320,AT4G11420,AT4G20360,AT4G26870,AT4G27090,AT4G29060,AT4G31180…	GO:0006518
cellular amide metabolic process	7.87156e-11	56	AT1G05190,AT1G09150,AT1G09640,AT1G11580,AT1G12920,AT1G18080,AT1G30230,AT1G32990,AT1G33140,AT1G48830,AT1G56070,AT1G57720,AT1G62750,AT1G72370,AT2G04842,AT2G20280,AT2G37270,AT2G39990,AT2G46280,AT3G02080,AT3G02200,AT3G02760,AT3G04600,AT3G11510,AT3G11710,AT3G13920,AT3G44890,AT3G53870,AT3G57290,AT3G62120,AT3G63140,AT3G63490,AT4G09800,AT4G10320,AT4G11420,AT4G20360,AT4G26870,AT4G27090,AT4G29060,AT4G31180…	GO:0043603
response to metal ion	1.13629e-10	35	AT1G11860,AT1G13440,AT1G18080,AT1G42970,AT1G57720,AT1G68560,AT2G01140,AT2G17630,AT2G21330,AT2G46280,AT2G47470,AT3G09440,AT3G11830,AT3G12780,AT3G18190,AT3G52930,AT3G60750,AT4G10320,AT4G20260,AT4G24190,AT4G24280,AT4G26870,AT4G29060,AT4G31180,AT4G37930,AT4G38970,AT5G02500,AT5G07350,AT5G17920,AT5G20720,AT5G23060,AT5G35630,AT5G61780,AT5G63400,ATCG00490	GO:0010038
protein-chromophore linkage	2.27277e-10	15	AT1G15820,AT2G05100,AT3G08940,AT3G47470,AT3G54890,AT4G10340,AT5G01530,AT5G24850,AT5G54270,ATCG00020,ATCG00270,ATCG00280,ATCG00340,ATCG00350,ATCG00680	GO:0018298
reductive pentose-phosphate cycle	9.72551e-09	10	AT1G12900,AT1G32060,AT1G42970,AT1G67090,AT3G12780,AT3G26650,AT3G54050,AT3G60750,AT5G38420,ATCG00490	GO:0019253
photosynthesis, dark reaction	9.72551e-09	10	AT1G12900,AT1G32060,AT1G42970,AT1G67090,AT3G12780,AT3G26650,AT3G54050,AT3G60750,AT5G38420,ATCG00490	GO:0019685
electron transport chain	1.70523e-08	19	AT1G15980,AT2G30950,AT3G50820,AT3G54050,AT4G01050,AT4G03280,AT4G04640,AT4G05180,AT4G21280,AT5G42270,AT5G64040,AT5G66190,AT5G66570,ATCG00020,ATCG00270,ATCG00280,ATCG00540,ATCG00680,ATCG00720	GO:0022900
carbon fixation	3.21175e-07	10	AT1G12900,AT1G32060,AT1G42970,AT1G67090,AT3G12780,AT3G26650,AT3G54050,AT3G60750,AT5G38420,ATCG00490	GO:0015977
glucose metabolic process	5.56095e-07	12	AT1G01320,AT1G12900,AT1G13440,AT1G42970,AT2G01140,AT2G21330,AT3G12780,AT3G26650,AT3G52930,AT3G54050,AT4G26530,AT4G38970	GO:0006006
response to cold	2.13978e-06	30	AT1G09560,AT1G32060,AT1G42970,AT1G55490,AT1G56070,AT1G67090,AT2G05100,AT2G20990,AT2G39730,AT3G01500,AT3G11630,AT3G12780,AT3G26650,AT3G47470,AT3G52150,AT3G54050,AT3G54890,AT4G20260,AT4G21150,AT4G24190,AT4G24280,AT4G35090,AT4G37930,AT5G02500,AT5G20630,AT5G20720,AT5G38480,AT5G65430,ATCG00120,ATCG00480	GO:0009409
cellular macromolecule biosynthetic process	6.16467e-06	58	AT1G05190,AT1G09150,AT1G11580,AT1G12920,AT1G18080,AT1G30230,AT1G32990,AT1G33140,AT1G48830,AT1G56070,AT1G62750,AT1G72370,AT2G01720,AT2G04842,AT2G20280,AT2G37270,AT2G39990,AT2G46280,AT3G02080,AT3G02200,AT3G02760,AT3G04600,AT3G11510,AT3G11710,AT3G13920,AT3G16000,AT3G44890,AT3G53870,AT3G57290,AT3G62120,AT3G63140,AT3G63490,AT4G09800,AT4G10320,AT4G10710,AT4G11420,AT4G20260,AT4G20360,AT4G21150,AT4G26870…	GO:0034645
photosynthesis, light harvesting	7.31403e-06	12	AT1G15820,AT1G54780,AT2G05100,AT2G30950,AT3G08940,AT3G47470,AT3G54890,AT4G10340,AT5G01530,AT5G54270,ATCG00270,ATCG00340	GO:0009765
photosynthetic electron transport in photosystem II	2.18014e-05	6	AT4G01050,AT4G04640,ATCG00020,ATCG00270,ATCG00280,ATCG00680	GO:0009772
response to temperature stimulus	6.59505e-05	35	AT1G09560,AT1G32060,AT1G42970,AT1G52740,AT1G55490,AT1G56070,AT1G67090,AT2G05100,AT2G20990,AT2G39730,AT3G01500,AT3G09440,AT3G11630,AT3G12780,AT3G26650,AT3G47470,AT3G52150,AT3G54050,AT3G54890,AT4G20260,AT4G21150,AT4G24190,AT4G24280,AT4G35090,AT4G37930,AT5G02500,AT5G07350,AT5G20630,AT5G20720,AT5G38480,AT5G56030,AT5G61780,AT5G65430,ATCG00120,ATCG00480	GO:0009266
gluconeogenesis	7.79485e-05	8	AT1G13440,AT2G01140,AT2G21330,AT3G12780,AT3G52930,AT3G54050,AT4G26530,AT4G38970	GO:0006094
response to inorganic substance	8.95118e-05	46	AT1G11860,AT1G13440,AT1G18080,AT1G42970,AT1G57720,AT1G68010,AT1G68560,AT1G78850,AT1G80410,AT2G01140,AT2G05100,AT2G17630,AT2G21330,AT2G45960,AT2G46280,AT2G47470,AT3G09440,AT3G11830,AT3G12780,AT3G14110,AT3G18190,AT3G52150,AT3G52930,AT3G53420,AT3G60750,AT4G10320,AT4G20260,AT4G24190,AT4G24280,AT4G26870,AT4G29060,AT4G31180,AT4G35090,AT4G37930,AT4G38970,AT5G02500,AT5G07350,AT5G17920,AT5G20720,AT5G23060…	GO:0010035
organonitrogen compound metabolic process	0.000106734	127	AT1G03630,AT1G05190,AT1G08520,AT1G09150,AT1G09640,AT1G11580,AT1G11860,AT1G12920,AT1G13270,AT1G13440,AT1G15820,AT1G18080,AT1G29900,AT1G30230,AT1G31690,AT1G32990,AT1G33140,AT1G48830,AT1G48850,AT1G54780,AT1G56070,AT1G57720,AT1G58290,AT1G62750,AT1G68830,AT1G72370,AT1G74470,AT1G80410,AT2G01140,AT2G01720,AT2G04842,AT2G05100,AT2G17630,AT2G20280,AT2G21330,AT2G24280,AT2G30950,AT2G31810,AT2G33340,AT2G37270…	GO:1901564
fructose 1,6-bisphosphate metabolic process	0.000115982	6	AT2G01140,AT2G21330,AT3G52930,AT3G54050,AT4G26530,AT4G38970	GO:0030388
hexose biosynthetic process	0.000154646	8	AT1G13440,AT2G01140,AT2G21330,AT3G12780,AT3G52930,AT3G54050,AT4G26530,AT4G38970	GO:0019319
protein folding	0.000305853	17	AT1G24510,AT1G55490,AT2G28000,AT3G03960,AT3G09440,AT3G11450,AT3G11830,AT3G18190,AT3G20050,AT4G24190,AT4G24280,AT5G02500,AT5G20720,AT5G20890,AT5G26360,AT5G55220,AT5G56030	GO:0006457
cytoplasmic translation	0.000488939	14	AT1G09150,AT1G12920,AT1G33140,AT1G72370,AT2G20280,AT2G39990,AT2G46280,AT3G02200,AT3G13920,AT3G57290,AT4G11420,AT4G33250,AT5G25757,AT5G27640	GO:0002181
purine ribonucleotide metabolic process	0.000499232	18	AT1G13440,AT2G01140,AT2G21330,AT3G12780,AT3G52930,AT4G04640,AT4G11010,AT4G26530,AT4G29220,AT4G32260,AT4G38970,AT5G08690,AT5G49460,ATCG00120,ATCG00130,ATCG00470,ATCG00480,ATCG00500	GO:0009150
cytoplasmic translational initiation	0.000513729	10	AT1G09150,AT2G39990,AT2G46280,AT3G02200,AT3G13920,AT3G57290,AT4G11420,AT4G33250,AT5G25757,AT5G27640	GO:0002183
tRNA aminoacylation for protein translation	0.000645032	10	AT2G04842,AT3G02760,AT3G04600,AT3G11710,AT3G62120,AT4G10320,AT4G26870,AT4G31180,AT5G26710,AT5G26830	GO:0006418
ribonucleotide metabolic process	0.000659721	19	AT1G13440,AT1G29900,AT2G01140,AT2G21330,AT3G12780,AT3G52930,AT4G04640,AT4G11010,AT4G26530,AT4G29220,AT4G32260,AT4G38970,AT5G08690,AT5G49460,ATCG00120,ATCG00130,ATCG00470,ATCG00480,ATCG00500	GO:0009259
formation of cytoplasmic translation initiation complex	0.000679931	7	AT2G39990,AT2G46280,AT3G57290,AT4G11420,AT4G33250,AT5G25757,AT5G27640	GO:0001732
photosynthesis, light harvesting in photosystem I	0.000679931	9	AT1G15820,AT2G05100,AT3G08940,AT3G47470,AT3G54890,AT4G10340,AT5G01530,AT5G54270,ATCG00340	GO:0009768
chlorophyll biosynthetic process	0.000765817	10	AT1G03630,AT1G08520,AT1G58290,AT1G74470,AT3G14110,AT3G56940,AT4G27440,AT5G08280,AT5G45930,AT5G50920	GO:0015995
purine nucleotide metabolic process	0.00086149	18	AT1G13440,AT2G01140,AT2G21330,AT3G12780,AT3G52930,AT4G04640,AT4G11010,AT4G26530,AT4G29220,AT4G32260,AT4G38970,AT5G08690,AT5G49460,ATCG00120,ATCG00130,ATCG00470,ATCG00480,ATCG00500	GO:0006163
amino acid activation	0.00106937	10	AT2G04842,AT3G02760,AT3G04600,AT3G11710,AT3G62120,AT4G10320,AT4G26870,AT4G31180,AT5G26710,AT5G26830	GO:0043038
tRNA aminoacylation	0.00106937	10	AT2G04842,AT3G02760,AT3G04600,AT3G11710,AT3G62120,AT4G10320,AT4G26870,AT4G31180,AT5G26710,AT5G26830	GO:0043039
ribose phosphate metabolic process	0.00124455	19	AT1G13440,AT1G29900,AT2G01140,AT2G21330,AT3G12780,AT3G52930,AT4G04640,AT4G11010,AT4G26530,AT4G29220,AT4G32260,AT4G38970,AT5G08690,AT5G49460,ATCG00120,ATCG00130,ATCG00470,ATCG00480,ATCG00500	GO:0019693
translational initiation	0.00186499	11	AT1G09150,AT2G39990,AT2G46280,AT3G02200,AT3G13920,AT3G57290,AT4G09800,AT4G11420,AT4G33250,AT5G25757,AT5G27640	GO:0006413
porphyrin-containing compound biosynthetic process	0.00233178	10	AT1G03630,AT1G08520,AT1G58290,AT1G74470,AT3G14110,AT3G56940,AT4G27440,AT5G08280,AT5G45930,AT5G50920	GO:0006779
ATP metabolic process	0.00311126	15	AT1G13440,AT2G01140,AT2G21330,AT3G12780,AT3G52930,AT4G04640,AT4G26530,AT4G29220,AT4G32260,AT4G38970,AT5G08690,ATCG00120,ATCG00130,ATCG00470,ATCG00480	GO:0046034
tetrapyrrole biosynthetic process	0.00312191	10	AT1G03630,AT1G08520,AT1G58290,AT1G74470,AT3G14110,AT3G56940,AT4G27440,AT5G08280,AT5G45930,AT5G50920	GO:0033014
nucleotide metabolic process	0.00378275	20	AT1G13440,AT1G29900,AT2G01140,AT2G21330,AT3G12780,AT3G52930,AT4G04640,AT4G11010,AT4G26530,AT4G29220,AT4G32260,AT4G38970,AT5G08690,AT5G35170,AT5G49460,ATCG00120,ATCG00130,ATCG00470,ATCG00480,ATCG00500	GO:0009117
purine-containing compound metabolic process	0.00384072	18	AT1G13440,AT2G01140,AT2G21330,AT3G12780,AT3G52930,AT4G04640,AT4G11010,AT4G26530,AT4G29220,AT4G32260,AT4G38970,AT5G08690,AT5G49460,ATCG00120,ATCG00130,ATCG00470,ATCG00480,ATCG00500	GO:0072521
photorespiration	0.00610885	9	AT1G67090,AT1G68010,AT3G12290,AT3G14420,AT4G37930,AT5G04140,AT5G09660,AT5G38420,ATCG00490	GO:0009853
nucleoside phosphate metabolic process	0.00668809	20	AT1G13440,AT1G29900,AT2G01140,AT2G21330,AT3G12780,AT3G52930,AT4G04640,AT4G11010,AT4G26530,AT4G29220,AT4G32260,AT4G38970,AT5G08690,AT5G35170,AT5G49460,ATCG00120,ATCG00130,ATCG00470,ATCG00480,ATCG00500	GO:0006753
small molecule metabolic process	0.0161905	61	AT1G01320,AT1G11860,AT1G12900,AT1G13440,AT1G24360,AT1G29900,AT1G42970,AT1G48850,AT1G74470,AT2G01140,AT2G04842,AT2G17630,AT2G21330,AT2G31810,AT2G33150,AT2G42790,AT3G02760,AT3G04600,AT3G06860,AT3G11710,AT3G12290,AT3G12780,AT3G14110,AT3G15020,AT3G26650,AT3G52720,AT3G52930,AT3G54050,AT3G57560,AT3G62120,AT4G04640,AT4G10320,AT4G11010,AT4G13940,AT4G26530,AT4G26870,AT4G29010,AT4G29220,AT4G31180,AT4G32260…	GO:0044281
chlorophyll metabolic process	0.0208863	10	AT1G03630,AT1G08520,AT1G58290,AT1G74470,AT3G14110,AT3G56940,AT4G27440,AT5G08280,AT5G45930,AT5G50920	GO:0015994
nucleoside diphosphate phosphorylation	0.0252236	10	AT1G13440,AT2G01140,AT2G21330,AT3G12780,AT3G52930,AT4G11010,AT4G26530,AT4G29220,AT4G38970,AT5G35170	GO:0006165
purine nucleoside triphosphate biosynthetic process	0.0263585	8	AT4G04640,AT4G11010,AT4G32260,AT5G08690,ATCG00120,ATCG00130,ATCG00470,ATCG00480	GO:0009145
purine ribonucleoside triphosphate metabolic process	0.0263585	8	AT4G04640,AT4G11010,AT4G32260,AT5G08690,ATCG00120,ATCG00130,ATCG00470,ATCG00480	GO:0009205
purine ribonucleoside triphosphate biosynthetic process	0.0263585	8	AT4G04640,AT4G11010,AT4G32260,AT5G08690,ATCG00120,ATCG00130,ATCG00470,ATCG00480	GO:0009206
ribonucleoprotein complex assembly	0.0291067	14	AT1G09150,AT1G72370,AT1G80070,AT2G33340,AT2G37270,AT2G39990,AT2G46280,AT3G02080,AT3G11510,AT3G57290,AT4G11420,AT4G33250,AT5G25757,AT5G27640	GO:0022618
nucleotide phosphorylation	0.0324482	10	AT1G13440,AT2G01140,AT2G21330,AT3G12780,AT3G52930,AT4G11010,AT4G26530,AT4G29220,AT4G38970,AT5G35170	GO:0046939
nucleoside triphosphate biosynthetic process	0.0344086	9	AT4G04640,AT4G11010,AT4G32260,AT5G08690,AT5G35170,ATCG00120,ATCG00130,ATCG00470,ATCG00480	GO:0009142
regulation of photosynthesis, light reaction	0.0352556	6	AT1G68830,AT2G30950,AT3G50820,AT5G01920,AT5G42270,AT5G66570	GO:0042548
ribonucleoprotein complex subunit organization	0.0363417	14	AT1G09150,AT1G72370,AT1G80070,AT2G33340,AT2G37270,AT2G39990,AT2G46280,AT3G02080,AT3G11510,AT3G57290,AT4G11420,AT4G33250,AT5G25757,AT5G27640	GO:0071826
purine nucleoside triphosphate metabolic process	0.0385099	8	AT4G04640,AT4G11010,AT4G32260,AT5G08690,ATCG00120,ATCG00130,ATCG00470,ATCG00480	GO:0009144
protein-containing complex assembly	0.0440759	30	AT1G09150,AT1G22700,AT1G67090,AT1G72370,AT1G80070,AT2G28800,AT2G30950,AT2G33340,AT2G37270,AT2G39990,AT2G46280,AT3G02080,AT3G11510,AT3G26650,AT3G46740,AT3G50820,AT3G57290,AT4G10340,AT4G11420,AT4G20260,AT4G33250,AT5G03940,AT5G20720,AT5G22880,AT5G25757,AT5G27640,AT5G42270,AT5G56030,AT5G66570,ATCG00680	GO:0065003
carboxylic acid metabolic process	0.047291	40	AT1G11860,AT1G13440,AT1G24360,AT1G29900,AT1G48850,AT2G01140,AT2G04842,AT2G17630,AT2G21330,AT2G31810,AT2G33150,AT2G42790,AT3G02760,AT3G04600,AT3G06860,AT3G11710,AT3G12780,AT3G14110,AT3G15020,AT3G52930,AT3G57560,AT3G62120,AT4G10320,AT4G26530,AT4G26870,AT4G29010,AT4G29220,AT4G31180,AT4G34200,AT4G35630,AT4G37930,AT4G38970,AT5G04140,AT5G09660,AT5G17920,AT5G26710,AT5G26830,AT5G35630,AT5G49460,ATCG00500	GO:0019752
GO CC	p-value	number	AGIs	GO
plastid	7.91058e-66	208	AT1G03630,AT1G05190,AT1G06950,AT1G08520,AT1G11860,AT1G12770,AT1G12900,AT1G13270,AT1G13440,AT1G15820,AT1G15980,AT1G16790,AT1G18060,AT1G18080,AT1G18440,AT1G20020,AT1G21500,AT1G22700,AT1G24360,AT1G28110,AT1G28600,AT1G29670,AT1G29900,AT1G30360,AT1G31330,AT1G31690,AT1G32060,AT1G32990,AT1G33140,AT1G42970,AT1G44575,AT1G48850,AT1G54780,AT1G55490,AT1G56070,AT1G58290,AT1G62750,AT1G67090,AT1G67700,AT1G68010…	GO:0009536
thylakoid	4.03741e-61	96	AT1G03630,AT1G08520,AT1G11860,AT1G15820,AT1G15980,AT1G16790,AT1G20020,AT1G21500,AT1G22700,AT1G29670,AT1G31330,AT1G32060,AT1G42970,AT1G44575,AT1G54780,AT1G67090,AT1G67700,AT1G68830,AT1G74470,AT2G01140,AT2G05100,AT2G17630,AT2G21330,AT2G28000,AT2G28800,AT2G30950,AT2G38540,AT2G39730,AT3G01500,AT3G08940,AT3G11630,AT3G12780,AT3G14110,AT3G16000,AT3G18890,AT3G26060,AT3G26070,AT3G26650,AT3G46780,AT3G47470…	GO:0009579
plastid envelope	7.48055e-61	116	AT1G03630,AT1G05190,AT1G06950,AT1G11860,AT1G12900,AT1G15820,AT1G15980,AT1G16790,AT1G20020,AT1G22700,AT1G24360,AT1G30360,AT1G31330,AT1G32060,AT1G32990,AT1G33140,AT1G42970,AT1G44575,AT1G54780,AT1G55490,AT1G58290,AT1G62750,AT1G67090,AT1G67700,AT1G68830,AT1G74470,AT2G05100,AT2G21330,AT2G28000,AT2G28800,AT2G30950,AT2G39730,AT3G01500,AT3G08580,AT3G08940,AT3G11630,AT3G12780,AT3G14110,AT3G16000,AT3G17970…	GO:0009526
chloroplast	8.23345e-58	182	AT1G03630,AT1G05190,AT1G06950,AT1G08520,AT1G11860,AT1G12770,AT1G12900,AT1G13270,AT1G13440,AT1G15820,AT1G15980,AT1G16790,AT1G18060,AT1G18080,AT1G18440,AT1G20020,AT1G21500,AT1G22700,AT1G24360,AT1G28110,AT1G28600,AT1G29670,AT1G29900,AT1G30360,AT1G31330,AT1G31690,AT1G32060,AT1G32990,AT1G33140,AT1G42970,AT1G44575,AT1G48850,AT1G54780,AT1G55490,AT1G56070,AT1G58290,AT1G62750,AT1G67090,AT1G67700,AT1G68010…	GO:0009507
chloroplast thylakoid	5.8681e-56	87	AT1G03630,AT1G08520,AT1G11860,AT1G15820,AT1G15980,AT1G16790,AT1G20020,AT1G21500,AT1G22700,AT1G29670,AT1G31330,AT1G32060,AT1G42970,AT1G44575,AT1G54780,AT1G67090,AT1G67700,AT1G68830,AT1G74470,AT2G01140,AT2G05100,AT2G17630,AT2G21330,AT2G28800,AT2G30950,AT2G38540,AT2G39730,AT3G01500,AT3G08940,AT3G14110,AT3G16000,AT3G18890,AT3G26060,AT3G26070,AT3G26650,AT3G46780,AT3G47470,AT3G50820,AT3G52150,AT3G54890…	GO:0009534
plastid thylakoid	6.99974e-56	87	AT1G03630,AT1G08520,AT1G11860,AT1G15820,AT1G15980,AT1G16790,AT1G20020,AT1G21500,AT1G22700,AT1G29670,AT1G31330,AT1G32060,AT1G42970,AT1G44575,AT1G54780,AT1G67090,AT1G67700,AT1G68830,AT1G74470,AT2G01140,AT2G05100,AT2G17630,AT2G21330,AT2G28800,AT2G30950,AT2G38540,AT2G39730,AT3G01500,AT3G08940,AT3G14110,AT3G16000,AT3G18890,AT3G26060,AT3G26070,AT3G26650,AT3G46780,AT3G47470,AT3G50820,AT3G52150,AT3G54890…	GO:0031976
organelle envelope	4.18115e-50	125	AT1G03630,AT1G05190,AT1G06950,AT1G11860,AT1G12900,AT1G14850,AT1G15820,AT1G15980,AT1G16790,AT1G20020,AT1G22700,AT1G24360,AT1G30360,AT1G31330,AT1G32060,AT1G32990,AT1G33140,AT1G42970,AT1G44575,AT1G54780,AT1G55490,AT1G58290,AT1G62750,AT1G67090,AT1G67230,AT1G67700,AT1G68830,AT1G74470,AT2G05100,AT2G21330,AT2G28000,AT2G28800,AT2G30950,AT2G39730,AT3G01500,AT3G08030,AT3G08580,AT3G08940,AT3G11630,AT3G12780…	GO:0031967
envelope	4.18115e-50	125	AT1G03630,AT1G05190,AT1G06950,AT1G11860,AT1G12900,AT1G14850,AT1G15820,AT1G15980,AT1G16790,AT1G20020,AT1G22700,AT1G24360,AT1G30360,AT1G31330,AT1G32060,AT1G32990,AT1G33140,AT1G42970,AT1G44575,AT1G54780,AT1G55490,AT1G58290,AT1G62750,AT1G67090,AT1G67230,AT1G67700,AT1G68830,AT1G74470,AT2G05100,AT2G21330,AT2G28000,AT2G28800,AT2G30950,AT2G39730,AT3G01500,AT3G08030,AT3G08580,AT3G08940,AT3G11630,AT3G12780…	GO:0031975
cytoplasm	1.51537e-49	319	AT1G01320,AT1G03220,AT1G03230,AT1G03630,AT1G05190,AT1G06950,AT1G08520,AT1G09150,AT1G09640,AT1G11580,AT1G11860,AT1G12770,AT1G12900,AT1G12920,AT1G13270,AT1G13440,AT1G15820,AT1G15980,AT1G16790,AT1G18060,AT1G18080,AT1G18440,AT1G20020,AT1G21500,AT1G22700,AT1G24360,AT1G24510,AT1G28110,AT1G28600,AT1G29670,AT1G29900,AT1G30230,AT1G30360,AT1G31330,AT1G31690,AT1G32060,AT1G32990,AT1G33140,AT1G33590,AT1G41830…	GO:0005737
chloroplast thylakoid membrane	2.64663e-47	72	AT1G03630,AT1G15820,AT1G15980,AT1G16790,AT1G20020,AT1G22700,AT1G31330,AT1G32060,AT1G42970,AT1G44575,AT1G54780,AT1G67090,AT1G67700,AT1G68830,AT1G74470,AT2G05100,AT2G28800,AT2G30950,AT2G39730,AT3G01500,AT3G08940,AT3G14110,AT3G16000,AT3G18890,AT3G26060,AT3G26070,AT3G26650,AT3G46780,AT3G47470,AT3G50820,AT3G52150,AT3G54890,AT3G56940,AT3G63490,AT4G01050,AT4G02770,AT4G03280,AT4G04640,AT4G05180,AT4G09010…	GO:0009535
plastid thylakoid membrane	3.17219e-47	72	AT1G03630,AT1G15820,AT1G15980,AT1G16790,AT1G20020,AT1G22700,AT1G31330,AT1G32060,AT1G42970,AT1G44575,AT1G54780,AT1G67090,AT1G67700,AT1G68830,AT1G74470,AT2G05100,AT2G28800,AT2G30950,AT2G39730,AT3G01500,AT3G08940,AT3G14110,AT3G16000,AT3G18890,AT3G26060,AT3G26070,AT3G26650,AT3G46780,AT3G47470,AT3G50820,AT3G52150,AT3G54890,AT3G56940,AT3G63490,AT4G01050,AT4G02770,AT4G03280,AT4G04640,AT4G05180,AT4G09010…	GO:0055035
thylakoid membrane	3.83807e-46	72	AT1G03630,AT1G15820,AT1G15980,AT1G16790,AT1G20020,AT1G22700,AT1G31330,AT1G32060,AT1G42970,AT1G44575,AT1G54780,AT1G67090,AT1G67700,AT1G68830,AT1G74470,AT2G05100,AT2G28800,AT2G30950,AT2G39730,AT3G01500,AT3G08940,AT3G14110,AT3G16000,AT3G18890,AT3G26060,AT3G26070,AT3G26650,AT3G46780,AT3G47470,AT3G50820,AT3G52150,AT3G54890,AT3G56940,AT3G63490,AT4G01050,AT4G02770,AT4G03280,AT4G04640,AT4G05180,AT4G09010…	GO:0042651
photosynthetic membrane	5.4304e-46	72	AT1G03630,AT1G15820,AT1G15980,AT1G16790,AT1G20020,AT1G22700,AT1G31330,AT1G32060,AT1G42970,AT1G44575,AT1G54780,AT1G67090,AT1G67700,AT1G68830,AT1G74470,AT2G05100,AT2G28800,AT2G30950,AT2G39730,AT3G01500,AT3G08940,AT3G14110,AT3G16000,AT3G18890,AT3G26060,AT3G26070,AT3G26650,AT3G46780,AT3G47470,AT3G50820,AT3G52150,AT3G54890,AT3G56940,AT3G63490,AT4G01050,AT4G02770,AT4G03280,AT4G04640,AT4G05180,AT4G09010…	GO:0034357
plastid stroma	1.35722e-45	90	AT1G05190,AT1G08520,AT1G11860,AT1G12900,AT1G18440,AT1G20020,AT1G24360,AT1G29900,AT1G31330,AT1G32060,AT1G32990,AT1G42970,AT1G48850,AT1G55490,AT1G62750,AT1G67090,AT2G01140,AT2G04842,AT2G05100,AT2G17630,AT2G21330,AT2G28000,AT2G39730,AT3G01500,AT3G08940,AT3G11630,AT3G12780,AT3G14420,AT3G16000,AT3G18890,AT3G26060,AT3G26070,AT3G26650,AT3G44890,AT3G46780,AT3G47470,AT3G50820,AT3G52150,AT3G52720,AT3G54050…	GO:0009532
chloroplast stroma	6.00451e-45	89	AT1G05190,AT1G08520,AT1G11860,AT1G12900,AT1G18440,AT1G20020,AT1G24360,AT1G29900,AT1G31330,AT1G32060,AT1G32990,AT1G42970,AT1G48850,AT1G55490,AT1G62750,AT1G67090,AT2G01140,AT2G04842,AT2G05100,AT2G17630,AT2G21330,AT2G28000,AT2G39730,AT3G01500,AT3G08940,AT3G11630,AT3G12780,AT3G14420,AT3G18890,AT3G26060,AT3G26070,AT3G26650,AT3G44890,AT3G46780,AT3G47470,AT3G50820,AT3G52150,AT3G52720,AT3G54050,AT3G54890…	GO:0009570
chloroplast envelope	3.58632e-43	87	AT1G03630,AT1G05190,AT1G06950,AT1G11860,AT1G12900,AT1G15820,AT1G16790,AT1G24360,AT1G30360,AT1G31330,AT1G32060,AT1G32990,AT1G33140,AT1G42970,AT1G55490,AT1G58290,AT1G62750,AT1G67090,AT1G67700,AT1G74470,AT2G05100,AT2G21330,AT2G28000,AT2G30950,AT2G39730,AT3G01500,AT3G08580,AT3G08940,AT3G11630,AT3G12780,AT3G14110,AT3G17970,AT3G18890,AT3G26060,AT3G26650,AT3G28220,AT3G44890,AT3G46740,AT3G46780,AT3G47470…	GO:0009941
cytosol	3.3354e-42	201	AT1G01320,AT1G03220,AT1G09640,AT1G11580,AT1G11860,AT1G12900,AT1G12920,AT1G13440,AT1G18080,AT1G20020,AT1G24510,AT1G29900,AT1G30230,AT1G32060,AT1G32990,AT1G33140,AT1G33590,AT1G42970,AT1G48830,AT1G48850,AT1G48900,AT1G55490,AT1G56070,AT1G56110,AT1G57720,AT1G65440,AT1G67090,AT1G67230,AT1G68010,AT1G68560,AT1G72150,AT1G72370,AT1G73180,AT1G78830,AT1G78850,AT1G80070,AT1G80410,AT2G01140,AT2G20280,AT2G21330…	GO:0005829
plastid membrane	5.9003e-40	80	AT1G03630,AT1G06950,AT1G15820,AT1G15980,AT1G16790,AT1G20020,AT1G22700,AT1G31330,AT1G32060,AT1G42970,AT1G44575,AT1G54780,AT1G58290,AT1G67090,AT1G67700,AT1G68830,AT1G74470,AT2G05100,AT2G28800,AT2G30950,AT2G39730,AT3G01500,AT3G08940,AT3G14110,AT3G16000,AT3G17970,AT3G18890,AT3G26060,AT3G26070,AT3G26650,AT3G46740,AT3G46780,AT3G47470,AT3G50820,AT3G51140,AT3G52150,AT3G54890,AT3G56940,AT3G63490,AT4G01050…	GO:0042170
apoplast	1.04666e-34	66	AT1G09560,AT1G11860,AT1G12900,AT1G20020,AT1G29670,AT1G32060,AT1G41830,AT1G42970,AT1G55490,AT1G62750,AT1G67090,AT1G68010,AT1G68560,AT1G72150,AT1G78060,AT1G78830,AT1G78850,AT2G06850,AT2G21330,AT2G28000,AT2G38540,AT2G39730,AT3G01500,AT3G09440,AT3G11630,AT3G12780,AT3G13750,AT3G14310,AT3G14420,AT3G15020,AT3G15356,AT3G16530,AT3G26650,AT3G52930,AT3G54050,AT3G54400,AT3G63140,AT4G05180,AT4G09000,AT4G20360…	GO:0048046
plastoglobule	1.73245e-26	29	AT1G31330,AT2G01140,AT2G05100,AT2G21330,AT2G39730,AT3G08940,AT3G26060,AT3G26070,AT3G47470,AT3G50820,AT3G54890,AT3G63140,AT4G02770,AT4G10340,AT4G12800,AT4G28750,AT4G38970,AT5G01530,AT5G54270,AT5G66570,ATCG00020,ATCG00120,ATCG00270,ATCG00280,ATCG00340,ATCG00350,ATCG00480,ATCG00490,ATCG00680	GO:0010287
organelle subcompartment	2.25173e-25	94	AT1G03630,AT1G08520,AT1G11860,AT1G15820,AT1G15980,AT1G16790,AT1G20020,AT1G21500,AT1G22700,AT1G29670,AT1G31330,AT1G32060,AT1G42970,AT1G44575,AT1G54780,AT1G67090,AT1G67700,AT1G68830,AT1G74470,AT2G01140,AT2G01720,AT2G05100,AT2G17630,AT2G20990,AT2G21330,AT2G28800,AT2G30950,AT2G38540,AT2G39730,AT3G01500,AT3G08940,AT3G14110,AT3G16000,AT3G18890,AT3G26060,AT3G26070,AT3G26650,AT3G46780,AT3G47470,AT3G50820…	GO:0031984
cell wall	3.83027e-23	77	AT1G03220,AT1G03230,AT1G09560,AT1G11580,AT1G13440,AT1G28110,AT1G28600,AT1G29670,AT1G33590,AT1G33600,AT1G41830,AT1G48830,AT1G56110,AT1G57720,AT1G68560,AT1G78060,AT1G78830,AT1G78850,AT2G01720,AT2G06850,AT2G33340,AT2G34060,AT2G37270,AT2G38540,AT2G39730,AT2G47470,AT3G02080,AT3G05910,AT3G06860,AT3G08030,AT3G08580,AT3G09440,AT3G12780,AT3G13750,AT3G13920,AT3G14310,AT3G15356,AT3G16530,AT3G52930,AT3G54400…	GO:0005618
intracellular anatomical structure	5.05345e-23	329	AT1G01320,AT1G03220,AT1G03230,AT1G03630,AT1G04190,AT1G05190,AT1G06950,AT1G08520,AT1G09150,AT1G09560,AT1G09640,AT1G11580,AT1G11860,AT1G12770,AT1G12900,AT1G12920,AT1G13270,AT1G13440,AT1G14850,AT1G15820,AT1G15980,AT1G16790,AT1G17690,AT1G18060,AT1G18080,AT1G18440,AT1G20020,AT1G21500,AT1G22700,AT1G24360,AT1G24510,AT1G28110,AT1G28600,AT1G29670,AT1G29900,AT1G30230,AT1G30360,AT1G31330,AT1G31690,AT1G32060…	GO:0005622
external encapsulating structure	1.45863e-22	77	AT1G03220,AT1G03230,AT1G09560,AT1G11580,AT1G13440,AT1G28110,AT1G28600,AT1G29670,AT1G33590,AT1G33600,AT1G41830,AT1G48830,AT1G56110,AT1G57720,AT1G68560,AT1G78060,AT1G78830,AT1G78850,AT2G01720,AT2G06850,AT2G33340,AT2G34060,AT2G37270,AT2G38540,AT2G39730,AT2G47470,AT3G02080,AT3G05910,AT3G06860,AT3G08030,AT3G08580,AT3G09440,AT3G12780,AT3G13750,AT3G13920,AT3G14310,AT3G15356,AT3G16530,AT3G52930,AT3G54400…	GO:0030312
protein-containing complex	1.92386e-20	132	AT1G06950,AT1G08520,AT1G12920,AT1G14850,AT1G15820,AT1G15980,AT1G17690,AT1G18080,AT1G20020,AT1G24510,AT1G29900,AT1G30230,AT1G31330,AT1G32990,AT1G33140,AT1G44575,AT1G48830,AT1G48900,AT1G52740,AT1G56070,AT1G56110,AT1G58290,AT1G65440,AT1G72370,AT1G73180,AT1G80070,AT1G80410,AT2G01720,AT2G05100,AT2G15430,AT2G27170,AT2G28800,AT2G33340,AT2G33730,AT2G37270,AT2G39990,AT2G46280,AT3G02080,AT3G02200,AT3G02710…	GO:0032991
cell-cell junction	3.54892e-20	77	AT1G03220,AT1G09560,AT1G09640,AT1G13440,AT1G14850,AT1G24510,AT1G28110,AT1G30360,AT1G33140,AT1G41830,AT1G56070,AT1G56110,AT1G57720,AT1G65440,AT1G68560,AT1G72150,AT1G72370,AT1G73620,AT1G78060,AT1G78830,AT1G80410,AT2G06850,AT2G20990,AT2G27170,AT2G34060,AT2G37270,AT2G40660,AT2G45960,AT3G02080,AT3G03960,AT3G06860,AT3G09440,AT3G11710,AT3G13750,AT3G13920,AT3G14420,AT3G22220,AT3G52930,AT3G53420,AT3G53870…	GO:0005911
plasmodesma	3.54892e-20	77	AT1G03220,AT1G09560,AT1G09640,AT1G13440,AT1G14850,AT1G24510,AT1G28110,AT1G30360,AT1G33140,AT1G41830,AT1G56070,AT1G56110,AT1G57720,AT1G65440,AT1G68560,AT1G72150,AT1G72370,AT1G73620,AT1G78060,AT1G78830,AT1G80410,AT2G06850,AT2G20990,AT2G27170,AT2G34060,AT2G37270,AT2G40660,AT2G45960,AT3G02080,AT3G03960,AT3G06860,AT3G09440,AT3G11710,AT3G13750,AT3G13920,AT3G14420,AT3G22220,AT3G52930,AT3G53420,AT3G53870…	GO:0009506
cell junction	3.54892e-20	77	AT1G03220,AT1G09560,AT1G09640,AT1G13440,AT1G14850,AT1G24510,AT1G28110,AT1G30360,AT1G33140,AT1G41830,AT1G56070,AT1G56110,AT1G57720,AT1G65440,AT1G68560,AT1G72150,AT1G72370,AT1G73620,AT1G78060,AT1G78830,AT1G80410,AT2G06850,AT2G20990,AT2G27170,AT2G34060,AT2G37270,AT2G40660,AT2G45960,AT3G02080,AT3G03960,AT3G06860,AT3G09440,AT3G11710,AT3G13750,AT3G13920,AT3G14420,AT3G22220,AT3G52930,AT3G53420,AT3G53870…	GO:0030054
anchoring junction	3.54892e-20	77	AT1G03220,AT1G09560,AT1G09640,AT1G13440,AT1G14850,AT1G24510,AT1G28110,AT1G30360,AT1G33140,AT1G41830,AT1G56070,AT1G56110,AT1G57720,AT1G65440,AT1G68560,AT1G72150,AT1G72370,AT1G73620,AT1G78060,AT1G78830,AT1G80410,AT2G06850,AT2G20990,AT2G27170,AT2G34060,AT2G37270,AT2G40660,AT2G45960,AT3G02080,AT3G03960,AT3G06860,AT3G09440,AT3G11710,AT3G13750,AT3G13920,AT3G14420,AT3G22220,AT3G52930,AT3G53420,AT3G53870…	GO:0070161
symplast	3.76945e-20	77	AT1G03220,AT1G09560,AT1G09640,AT1G13440,AT1G14850,AT1G24510,AT1G28110,AT1G30360,AT1G33140,AT1G41830,AT1G56070,AT1G56110,AT1G57720,AT1G65440,AT1G68560,AT1G72150,AT1G72370,AT1G73620,AT1G78060,AT1G78830,AT1G80410,AT2G06850,AT2G20990,AT2G27170,AT2G34060,AT2G37270,AT2G40660,AT2G45960,AT3G02080,AT3G03960,AT3G06860,AT3G09440,AT3G11710,AT3G13750,AT3G13920,AT3G14420,AT3G22220,AT3G52930,AT3G53420,AT3G53870…	GO:0055044
photosystem	5.03047e-18	24	AT1G15820,AT1G31330,AT1G44575,AT2G05100,AT3G08940,AT3G47470,AT3G50820,AT3G54890,AT4G02770,AT4G05180,AT4G10340,AT4G12800,AT4G21280,AT4G28750,AT5G01530,AT5G54270,AT5G64040,AT5G66570,ATCG00020,ATCG00270,ATCG00280,ATCG00340,ATCG00350,ATCG00680	GO:0009521
organelle membrane	1.92084e-16	114	AT1G03630,AT1G06950,AT1G11580,AT1G15820,AT1G15980,AT1G16790,AT1G20020,AT1G22700,AT1G30360,AT1G31330,AT1G32060,AT1G33140,AT1G42970,AT1G44575,AT1G54780,AT1G56070,AT1G58290,AT1G67090,AT1G67230,AT1G67700,AT1G68830,AT1G74470,AT1G78850,AT2G01720,AT2G05100,AT2G20990,AT2G28800,AT2G30950,AT2G33150,AT2G37270,AT2G39730,AT2G45740,AT2G47470,AT3G01500,AT3G08580,AT3G08940,AT3G09440,AT3G14110,AT3G16000,AT3G17970…	GO:0031090
extracellular region	8.5405e-16	108	AT1G01320,AT1G03220,AT1G03230,AT1G03630,AT1G05190,AT1G06950,AT1G08520,AT1G09560,AT1G09640,AT1G11580,AT1G11860,AT1G12900,AT1G12920,AT1G13270,AT1G13440,AT1G20020,AT1G28110,AT1G28600,AT1G29670,AT1G30360,AT1G32060,AT1G41830,AT1G42970,AT1G55490,AT1G62750,AT1G67090,AT1G67230,AT1G68010,AT1G68560,AT1G72150,AT1G73620,AT1G78060,AT1G78830,AT1G78850,AT2G06850,AT2G18980,AT2G21330,AT2G24280,AT2G28000,AT2G34060…	GO:0005576
stromule	6.92696e-15	15	AT1G32060,AT1G42970,AT1G55490,AT2G28000,AT2G39730,AT3G01500,AT3G11630,AT3G12780,AT3G26650,AT3G54050,AT3G63140,AT4G35090,AT4G37930,ATCG00120,ATCG00480	GO:0010319
intracellular membrane-bounded organelle	4.27174e-13	300	AT1G01320,AT1G03220,AT1G03230,AT1G03630,AT1G04190,AT1G05190,AT1G06950,AT1G08520,AT1G09560,AT1G09640,AT1G11580,AT1G11860,AT1G12770,AT1G12900,AT1G13270,AT1G13440,AT1G14850,AT1G15820,AT1G15980,AT1G16790,AT1G17690,AT1G18060,AT1G18080,AT1G18440,AT1G20020,AT1G21500,AT1G22700,AT1G24360,AT1G24510,AT1G28110,AT1G28600,AT1G29670,AT1G29900,AT1G30230,AT1G30360,AT1G31330,AT1G31690,AT1G32060,AT1G32990,AT1G33140…	GO:0043231
photosystem I	4.87316e-13	15	AT1G15820,AT1G31330,AT2G05100,AT3G08940,AT3G47470,AT3G54890,AT4G02770,AT4G10340,AT4G12800,AT4G28750,AT5G01530,AT5G54270,AT5G64040,ATCG00340,ATCG00350	GO:0009522
cytosolic ribosome	9.77583e-13	33	AT1G11860,AT1G18080,AT1G32990,AT1G33140,AT1G48830,AT1G55490,AT1G67090,AT1G72370,AT1G73180,AT2G21330,AT2G28000,AT2G37270,AT3G02080,AT3G09440,AT3G11510,AT3G14420,AT3G53870,AT3G63490,AT4G09800,AT4G25740,AT4G27090,AT4G35090,AT4G37930,AT5G02500,AT5G16130,AT5G26000,AT5G30510,AT5G35630,AT5G38420,AT5G41520,AT5G45775,ATCG00490,ATCG00800	GO:0022626
ribosome	9.794e-13	41	AT1G05190,AT1G11860,AT1G16790,AT1G18080,AT1G32990,AT1G33140,AT1G48830,AT1G55490,AT1G67090,AT1G72370,AT1G73180,AT2G21330,AT2G28000,AT2G37270,AT3G02080,AT3G09440,AT3G11510,AT3G14420,AT3G44890,AT3G52150,AT3G53870,AT3G63140,AT3G63490,AT4G09800,AT4G25740,AT4G27090,AT4G29060,AT4G34620,AT4G35090,AT4G37930,AT5G02500,AT5G16130,AT5G26000,AT5G30510,AT5G35630,AT5G38420,AT5G41520,AT5G45775,ATCG00490,ATCG00780…	GO:0005840
membrane protein complex	1.34265e-12	43	AT1G06950,AT1G15820,AT1G20020,AT1G31330,AT1G44575,AT2G01720,AT2G05100,AT3G08940,AT3G18890,AT3G46740,AT3G47470,AT3G50820,AT3G54890,AT4G01050,AT4G02770,AT4G04640,AT4G05180,AT4G10340,AT4G12800,AT4G21150,AT4G21280,AT4G28750,AT4G32260,AT5G01530,AT5G05010,AT5G08690,AT5G50920,AT5G54270,AT5G64040,AT5G66190,AT5G66570,AT5G66680,ATCG00020,ATCG00120,ATCG00130,ATCG00270,ATCG00280,ATCG00340,ATCG00350,ATCG00470…	GO:0098796
membrane-bounded organelle	1.42755e-12	300	AT1G01320,AT1G03220,AT1G03230,AT1G03630,AT1G04190,AT1G05190,AT1G06950,AT1G08520,AT1G09560,AT1G09640,AT1G11580,AT1G11860,AT1G12770,AT1G12900,AT1G13270,AT1G13440,AT1G14850,AT1G15820,AT1G15980,AT1G16790,AT1G17690,AT1G18060,AT1G18080,AT1G18440,AT1G20020,AT1G21500,AT1G22700,AT1G24360,AT1G24510,AT1G28110,AT1G28600,AT1G29670,AT1G29900,AT1G30230,AT1G30360,AT1G31330,AT1G31690,AT1G32060,AT1G32990,AT1G33140…	GO:0043227
intracellular organelle	6.57955e-12	301	AT1G01320,AT1G03220,AT1G03230,AT1G03630,AT1G04190,AT1G05190,AT1G06950,AT1G08520,AT1G09560,AT1G09640,AT1G11580,AT1G11860,AT1G12770,AT1G12900,AT1G13270,AT1G13440,AT1G14850,AT1G15820,AT1G15980,AT1G16790,AT1G17690,AT1G18060,AT1G18080,AT1G18440,AT1G20020,AT1G21500,AT1G22700,AT1G24360,AT1G24510,AT1G28110,AT1G28600,AT1G29670,AT1G29900,AT1G30230,AT1G30360,AT1G31330,AT1G31690,AT1G32060,AT1G32990,AT1G33140…	GO:0043229
chloroplast thylakoid membrane protein complex	7.98996e-12	12	AT1G20020,AT1G44575,AT2G05100,AT3G18890,AT4G01050,AT4G04640,AT4G10340,AT5G54270,AT5G64040,AT5G66190,ATCG00120,ATCG00480	GO:0098807
organelle	1.63276e-11	301	AT1G01320,AT1G03220,AT1G03230,AT1G03630,AT1G04190,AT1G05190,AT1G06950,AT1G08520,AT1G09560,AT1G09640,AT1G11580,AT1G11860,AT1G12770,AT1G12900,AT1G13270,AT1G13440,AT1G14850,AT1G15820,AT1G15980,AT1G16790,AT1G17690,AT1G18060,AT1G18080,AT1G18440,AT1G20020,AT1G21500,AT1G22700,AT1G24360,AT1G24510,AT1G28110,AT1G28600,AT1G29670,AT1G29900,AT1G30230,AT1G30360,AT1G31330,AT1G31690,AT1G32060,AT1G32990,AT1G33140…	GO:0043226
non-membrane-bounded organelle	7.4857e-11	81	AT1G05190,AT1G11860,AT1G13440,AT1G14850,AT1G16790,AT1G17690,AT1G18080,AT1G32990,AT1G33140,AT1G48830,AT1G48850,AT1G52740,AT1G55490,AT1G56070,AT1G56110,AT1G65440,AT1G67090,AT1G67230,AT1G72370,AT1G73180,AT2G15430,AT2G21330,AT2G27170,AT2G28000,AT2G33150,AT2G37270,AT3G02080,AT3G06860,AT3G08580,AT3G09440,AT3G11510,AT3G13920,AT3G14420,AT3G16000,AT3G22320,AT3G44890,AT3G46780,AT3G51800,AT3G52150,AT3G52930…	GO:0043228
intracellular non-membrane-bounded organelle	7.4857e-11	81	AT1G05190,AT1G11860,AT1G13440,AT1G14850,AT1G16790,AT1G17690,AT1G18080,AT1G32990,AT1G33140,AT1G48830,AT1G48850,AT1G52740,AT1G55490,AT1G56070,AT1G56110,AT1G65440,AT1G67090,AT1G67230,AT1G72370,AT1G73180,AT2G15430,AT2G21330,AT2G27170,AT2G28000,AT2G33150,AT2G37270,AT3G02080,AT3G06860,AT3G08580,AT3G09440,AT3G11510,AT3G13920,AT3G14420,AT3G16000,AT3G22320,AT3G44890,AT3G46780,AT3G51800,AT3G52150,AT3G52930…	GO:0043232
photosystem II	1.84395e-09	15	AT1G15820,AT1G44575,AT2G05100,AT3G08940,AT3G50820,AT4G05180,AT4G10340,AT4G21280,AT5G01530,AT5G54270,AT5G66570,ATCG00020,ATCG00270,ATCG00280,ATCG00680	GO:0009523
cell periphery	1.42383e-08	141	AT1G03220,AT1G03230,AT1G09560,AT1G09640,AT1G11580,AT1G12920,AT1G13440,AT1G14850,AT1G18080,AT1G24510,AT1G28110,AT1G28600,AT1G29670,AT1G30230,AT1G30360,AT1G33140,AT1G33590,AT1G33600,AT1G41830,AT1G48830,AT1G55490,AT1G56070,AT1G56110,AT1G57720,AT1G68560,AT1G72150,AT1G72370,AT1G78060,AT1G78830,AT1G78850,AT2G01720,AT2G06850,AT2G20990,AT2G33340,AT2G34060,AT2G37270,AT2G38540,AT2G39010,AT2G39730,AT2G45960…	GO:0071944
thylakoid lumen	2.24752e-08	15	AT1G54780,AT1G67090,AT2G21330,AT2G30950,AT3G26060,AT3G50820,AT4G05180,AT4G09010,AT4G11010,AT4G21280,AT5G64040,AT5G66190,AT5G66570,ATCG00120,ATCG00480	GO:0031977
chaperonin-containing T-complex	1.75598e-07	7	AT1G24510,AT3G03960,AT3G11830,AT3G18190,AT3G20050,AT5G20890,AT5G26360	GO:0005832
vacuole	2.56987e-07	57	AT1G09640,AT1G11580,AT1G28110,AT1G30360,AT1G33140,AT1G52740,AT1G56070,AT1G57720,AT1G72150,AT1G78850,AT2G01720,AT2G20990,AT2G24280,AT2G33150,AT2G37270,AT2G45960,AT2G47470,AT3G02110,AT3G08580,AT3G09440,AT3G13750,AT3G19820,AT3G28220,AT3G46740,AT3G52930,AT3G53420,AT3G62290,AT4G09000,AT4G09800,AT4G13940,AT4G18030,AT4G20260,AT4G20830,AT4G21150,AT4G24190,AT4G27090,AT4G30190,AT4G31340,AT4G35000,AT4G35100…	GO:0005773
ribonucleoprotein complex	2.57469e-07	41	AT1G17690,AT1G18080,AT1G32990,AT1G33140,AT1G48830,AT1G48900,AT1G56070,AT1G56110,AT1G72370,AT1G73180,AT1G80070,AT2G33340,AT2G33730,AT2G37270,AT2G39990,AT2G46280,AT3G02080,AT3G02710,AT3G11510,AT3G44890,AT3G53870,AT3G57290,AT3G63490,AT4G09800,AT4G11420,AT4G25740,AT4G27090,AT4G33250,AT4G34620,AT5G03940,AT5G07350,AT5G16130,AT5G25757,AT5G27640,AT5G30510,AT5G41520,AT5G45775,AT5G60980,AT5G61780,ATCG00780…	GO:1990904
mitochondrion	4.87944e-07	78	AT1G11860,AT1G12770,AT1G13270,AT1G13440,AT1G24360,AT1G62750,AT1G67090,AT1G67230,AT1G67700,AT1G68010,AT1G68560,AT1G72150,AT1G73180,AT1G74470,AT1G78060,AT1G78830,AT1G78850,AT1G80070,AT1G80410,AT2G01140,AT2G01720,AT2G04842,AT2G05100,AT2G06850,AT2G20280,AT2G21330,AT2G28000,AT2G33150,AT2G42790,AT2G45740,AT3G02760,AT3G08580,AT3G12780,AT3G15020,AT3G44890,AT3G46740,AT3G52140,AT3G52930,AT3G55410,AT3G57560…	GO:0005739
plant-type cell wall	2.44734e-06	52	AT1G13440,AT1G28110,AT1G33590,AT1G48830,AT1G56110,AT1G57720,AT1G68560,AT1G78060,AT1G78830,AT2G01720,AT2G06850,AT2G33340,AT2G34060,AT2G37270,AT2G38540,AT2G39730,AT2G47470,AT3G02080,AT3G05910,AT3G06860,AT3G08580,AT3G09440,AT3G12780,AT3G13750,AT3G13920,AT3G52930,AT3G57880,AT3G61820,AT4G09800,AT4G18030,AT4G19410,AT4G20830,AT4G21150,AT4G29010,AT5G02500,AT5G07350,AT5G08370,AT5G19780,AT5G20890,AT5G26830…	GO:0009505
chaperone complex	3.20024e-06	7	AT1G24510,AT3G03960,AT3G11830,AT3G18190,AT3G20050,AT5G20890,AT5G26360	GO:0101031
nucleolus	8.11793e-06	31	AT1G13440,AT1G14850,AT1G17690,AT1G33140,AT1G48850,AT1G56070,AT1G56110,AT2G15430,AT2G33150,AT3G06860,AT3G08580,AT3G11510,AT3G13920,AT3G22320,AT3G51800,AT3G52930,AT3G58510,AT4G09800,AT4G10710,AT4G16143,AT4G20360,AT4G25210,AT4G27090,AT5G02500,AT5G08690,AT5G10980,AT5G16130,AT5G22880,AT5G46070,AT5G59970,AT5G66680	GO:0005730
eukaryotic 43S preinitiation complex	2.34951e-05	7	AT2G39990,AT2G46280,AT3G57290,AT4G11420,AT4G33250,AT5G25757,AT5G27640	GO:0016282
peroxisome	4.88624e-05	22	AT1G13440,AT1G68010,AT2G28000,AT2G28800,AT2G30950,AT2G31810,AT2G33150,AT2G42520,AT2G42790,AT2G45740,AT3G06860,AT3G14420,AT3G56460,AT3G58510,AT4G29010,AT4G35000,AT4G35090,AT5G09660,AT5G17920,AT5G26000,AT5G41210,AT5G59970	GO:0005777
microbody	4.88624e-05	22	AT1G13440,AT1G68010,AT2G28000,AT2G28800,AT2G30950,AT2G31810,AT2G33150,AT2G42520,AT2G42790,AT2G45740,AT3G06860,AT3G14420,AT3G56460,AT3G58510,AT4G29010,AT4G35000,AT4G35090,AT5G09660,AT5G17920,AT5G26000,AT5G41210,AT5G59970	GO:0042579
eukaryotic translation initiation factor 3 complex	5.23904e-05	8	AT2G39990,AT2G46280,AT3G02200,AT3G57290,AT4G11420,AT4G33250,AT5G25757,AT5G27640	GO:0005852
eukaryotic 48S preinitiation complex	5.23904e-05	7	AT2G39990,AT2G46280,AT3G57290,AT4G11420,AT4G33250,AT5G25757,AT5G27640	GO:0033290
translation preinitiation complex	5.23904e-05	7	AT2G39990,AT2G46280,AT3G57290,AT4G11420,AT4G33250,AT5G25757,AT5G27640	GO:0070993
proton-transporting ATP synthase complex	0.000152023	8	AT4G04640,AT4G32260,AT5G08690,ATCG00120,ATCG00130,ATCG00470,ATCG00480,ATMG01190	GO:0045259
cytosolic small ribosomal subunit	0.000212772	13	AT1G48830,AT1G72370,AT1G73180,AT2G37270,AT3G02080,AT3G11510,AT3G53870,AT4G09800,AT4G25740,AT5G16130,AT5G30510,AT5G41520,ATCG00800	GO:0022627
proton-transporting ATP synthase complex, catalytic core F(1)	0.000215692	6	AT4G04640,AT5G08690,ATCG00120,ATCG00470,ATCG00480,ATMG01190	GO:0045261
small ribosomal subunit	0.000641136	14	AT1G48830,AT1G72370,AT1G73180,AT2G37270,AT3G02080,AT3G11510,AT3G53870,AT4G09800,AT4G25740,AT4G34620,AT5G16130,AT5G30510,AT5G41520,ATCG00800	GO:0015935
ribosomal subunit	0.000733455	21	AT1G32990,AT1G33140,AT1G48830,AT1G72370,AT1G73180,AT2G37270,AT3G02080,AT3G11510,AT3G44890,AT3G53870,AT3G63490,AT4G09800,AT4G25740,AT4G27090,AT4G34620,AT5G16130,AT5G30510,AT5G41520,AT5G45775,ATCG00780,ATCG00800	GO:0044391
membrane-enclosed lumen	0.000864069	47	AT1G13440,AT1G14850,AT1G17690,AT1G33140,AT1G48850,AT1G56070,AT1G56110,AT1G65440,AT1G67230,AT2G15430,AT2G27170,AT2G33150,AT2G42790,AT3G06860,AT3G08580,AT3G09440,AT3G11510,AT3G13920,AT3G15020,AT3G16000,AT3G22320,AT3G51800,AT3G52930,AT3G57560,AT3G58510,AT4G09800,AT4G10710,AT4G11010,AT4G16143,AT4G20360,AT4G24190,AT4G25210,AT4G27090,AT4G35800,AT4G37930,AT5G02500,AT5G04140,AT5G08690,AT5G10980,AT5G16130…	GO:0031974
organelle lumen	0.000864069	47	AT1G13440,AT1G14850,AT1G17690,AT1G33140,AT1G48850,AT1G56070,AT1G56110,AT1G65440,AT1G67230,AT2G15430,AT2G27170,AT2G33150,AT2G42790,AT3G06860,AT3G08580,AT3G09440,AT3G11510,AT3G13920,AT3G15020,AT3G16000,AT3G22320,AT3G51800,AT3G52930,AT3G57560,AT3G58510,AT4G09800,AT4G10710,AT4G11010,AT4G16143,AT4G20360,AT4G24190,AT4G25210,AT4G27090,AT4G35800,AT4G37930,AT5G02500,AT5G04140,AT5G08690,AT5G10980,AT5G16130…	GO:0043233
intracellular organelle lumen	0.000864069	47	AT1G13440,AT1G14850,AT1G17690,AT1G33140,AT1G48850,AT1G56070,AT1G56110,AT1G65440,AT1G67230,AT2G15430,AT2G27170,AT2G33150,AT2G42790,AT3G06860,AT3G08580,AT3G09440,AT3G11510,AT3G13920,AT3G15020,AT3G16000,AT3G22320,AT3G51800,AT3G52930,AT3G57560,AT3G58510,AT4G09800,AT4G10710,AT4G11010,AT4G16143,AT4G20360,AT4G24190,AT4G25210,AT4G27090,AT4G35800,AT4G37930,AT5G02500,AT5G04140,AT5G08690,AT5G10980,AT5G16130…	GO:0070013
PSII associated light-harvesting complex II	0.00142846	4	AT1G44575,AT2G05100,AT4G10340,AT5G54270	GO:0009517
chloroplast membrane	0.00229893	19	AT1G03630,AT1G06950,AT1G42970,AT1G58290,AT1G67090,AT1G74470,AT3G14110,AT3G17970,AT3G18890,AT3G26650,AT3G46740,AT3G51140,AT3G56940,AT4G02510,AT4G12800,AT4G27440,AT5G05000,AT5G46110,AT5G50920	GO:0031969
proton-transporting two-sector ATPase complex, catalytic domain	0.00527736	6	AT4G04640,AT5G08690,ATCG00120,ATCG00470,ATCG00480,ATMG01190	GO:0033178
TOC-TIC supercomplex I	0.00545134	3	AT1G06950,AT3G46740,AT4G02510	GO:0061927
thylakoid light-harvesting complex	0.00644942	4	AT1G44575,AT2G05100,AT4G10340,AT5G54270	GO:0009503
photosystem I reaction center	0.00644942	6	AT1G31330,AT4G02770,AT4G12800,AT4G28750,ATCG00340,ATCG00350	GO:0009538
light-harvesting complex	0.00644942	4	AT1G44575,AT2G05100,AT4G10340,AT5G54270	GO:0030076
polysomal ribosome	0.00783189	10	AT1G18080,AT1G48830,AT1G72370,AT2G37270,AT3G02080,AT3G11510,AT3G53870,AT4G27090,AT5G16130,AT5G41520	GO:0042788
nuclear lumen	0.0123842	38	AT1G13440,AT1G14850,AT1G17690,AT1G33140,AT1G48850,AT1G56070,AT1G56110,AT1G65440,AT1G67230,AT2G15430,AT2G27170,AT2G33150,AT3G06860,AT3G08580,AT3G09440,AT3G11510,AT3G13920,AT3G16000,AT3G22320,AT3G51800,AT3G52930,AT3G58510,AT4G09800,AT4G10710,AT4G16143,AT4G20360,AT4G25210,AT4G27090,AT4G35800,AT5G02500,AT5G08690,AT5G10980,AT5G16130,AT5G22880,AT5G41520,AT5G46070,AT5G59970,AT5G66680	GO:0031981
proton-transporting two-sector ATPase complex	0.0158227	8	AT4G04640,AT4G32260,AT5G08690,ATCG00120,ATCG00130,ATCG00470,ATCG00480,ATMG01190	GO:0016469
polysome	0.0160446	10	AT1G18080,AT1G48830,AT1G72370,AT2G37270,AT3G02080,AT3G11510,AT3G53870,AT4G27090,AT5G16130,AT5G41520	GO:0005844
aminoacyl-tRNA synthetase multienzyme complex	0.0213272	3	AT3G62120,AT4G26870,AT4G31180	GO:0017101
vacuolar membrane	0.0339953	26	AT1G11580,AT1G30360,AT1G33140,AT1G56070,AT1G78850,AT2G01720,AT2G33150,AT2G37270,AT2G47470,AT3G08580,AT3G09440,AT3G19820,AT3G46740,AT3G52930,AT4G09800,AT4G13940,AT4G18030,AT4G21150,AT4G24190,AT4G27090,AT4G35000,AT5G02500,AT5G17920,AT5G59970,AT5G63400,AT5G66680	GO:0005774

## Sheet: overlap mRNA interactome
Bach-Pages et al., 2020	Reichel et al., 2016	Marondedze et al., 2016	Zhang et al., 2016		229 common proteins in Csy4*-based pulldowns and interactome capture
AT3G03780	AT3G11940	AT1G01160	AT2G04390		AT4G35100
ATCG01020	AT5G15200	AT1G01440	AT2G05220		AT3G14310
ATCG00520	AT3G47370	AT1G05960	AT3G10610		AT4G21280
AT3G44320	AT5G10360	AT1G09700	AT5G04800		AT4G38970
AT4G13940	AT2G40590	AT1G10320	AT3G53020		AT3G13470
AT3G08530	AT1G48830	AT1G13710	AT2G39460		AT4G02770
AT4G20850	AT2G18020	AT1G14590	AT3G55280		AT1G18080
AT4G16990	AT1G20220	AT1G14790	AT1G33120		ATCG00270
AT1G13270	At5g62300	AT1G16650	AT1G18540		ATCG00340
ATCG00150	AT4G27000	AT1G17550	AT1G74060		AT3G56940
AT1G44920	AT1G11650	AT1G18485	AT1G74050		AT4G03280
AT4G35100	AT3G19130	AT1G19860	AT4G16720		AT1G30360
AT1G44575	AT3G53460	AT1G20570	AT4G17390		ATCG00020
AT3G62240	AT1G49760	AT1G21250	AT3G05560		ATCG00280
AT1G37130	AT3G53870	AT1G22080	AT5G27770		ATCG00350
AT3G17390	AT5G18380	AT1G22260	AT2G31610		AT1G31330
ATCG00190	AT2G41840	AT1G24706	AT3G53870		AT5G63420
ATCG00065	AT5G54900	AT1G26610	AT5G35530		AT5G38420
AT1G10760	AT5G60980	AT1G26640	AT5G15200		AT4G10340
AT4G38950	AT1G17370	AT1G26730	AT3G60770		AT1G15820
AT1G66200	AT3G14100	AT1G33560	AT4G00100		ATCG00680
AT5G25610	AT3G02560	AT1G35510	AT1G23410		AT5G17170
AT1G14880	AT2G21060	AT1G44160	AT2G47110		AT1G16720
ATCG00840	AT5G16130	AT1G44180	AT3G62250		AT5G50920
AT1G61520	AT5G02530	AT1G48050	AT1G07770		AT1G67700
AT3G14310	AT1G78260	AT1G50870	AT2G42740		AT5G01530
AT2G34357	AT4G34110	AT1G51800	AT3G58700		AT1G09340
AT4G21280	AT4G27090	AT1G53025	AT3G22230		AT3G08940
AT1G71210	AT1G49600	AT1G53470	AT4G15000		AT2G43030
AT1G59990	At2g37270	AT1G54130	AT2G34480		AT4G26370
ATCG00540	At1g22780	AT1G54490	AT3G14600		AT5G35630
AT4G14850	AT3G25150	AT1G55040	AT3G10950		AT4G01310
AT1G07930	AT5G50250	AT1G55670	AT3G60245		AT3G15190
AT2G15690	AT3G48930	AT1G55840	AT3G04920		AT4G28080
AT1G11290	AT5G07350	AT1G58230	AT5G28060		AT4G32720
AT3G03710	AT3G06410	AT1G58370	AT2G17360		ATCG00180
AT5G06320	AT4G27500	AT1G58807	AT5G07090		AT2G24420
AT5G42390	AT5G18550	AT1G60650	AT5G58420		AT3G61240
AT1G75040	AT3G04840	AT1G61010	AT4G31700		AT1G76810
AT1G27400	AT5G04280	AT1G63130	AT5G10360		AT5G08610
AT3G26520	AT3G07810	AT1G64460	AT5G20290		AT3G05060
AT3G57410	AT2G35410	AT1G66880	AT2G18020		ATCG00480
AT3G14330	AT2G44120	AT1G67120	AT4G36130		AT1G73530
AT1G01320	AT1G69620	AT1G67470	AT3G48930		AT1G33330
AT5G62670	AT1G20880	AT1G67510	AT4G30800		ATCG00120
AT1G76180	AT1G76010	AT1G67720	AT5G23740		AT1G10840
AT4G28750	AT1G48920	AT1G68460	AT3G05590		AT5G17920
AT3G63490	AT2G21660	AT1G70290	AT5G27850		AT5G02500
AT5G21160	AT3G07030	AT1G70320	AT2G09990		AT3G51800
AT5G42270	AT2G33410	AT1G70800	AT3G04230		AT3G50820
AT5G56030	At3g13460	AT1G71060	AT5G18380		AT1G11860
AT1G72660	AT4G03110	AT1G72840	AT1G22780		AT3G19760
AT1G62780	AT3G04920	AT1G78160	AT1G02780		AT1G42970
AT2G47680	AT2G34040	AT1G78970	AT1G36240		AT2G33800
AT4G38970	AT1G54080	AT1G80120	AT1G77940		AT5G54600
AT2G07715	AT3G11510	AT2G03250	AT1G43170		ATCG00490
AT3G62310	AT5G04430	AT2G07715	AT3G62870		AT5G20290
AT3G14420	AT1G14710	AT2G12940	AT2G41840		AT5G61780
AT5G47190	At1g43170	AT2G17010	AT3G25520		AT2G39730
AT2G35240	AT1G02780	AT2G17110	AT5G39740		AT5G59950
AT1G48600	AT3G53020	AT2G18720	AT2G37270		AT5G52470
AT5G03280	AT2G33845	AT2G20240	AT3G11940		AT4G34110
AT3G13470	At2g37220	AT2G20870	AT3G07110		AT3G26650
AT4G02770	AT2G23350	AT2G30160	AT4G13170		AT1G54780
AT3G60750	At5g27770	AT2G30780	AT3G04840		AT3G44110
AT1G53210	AT5G43960	AT2G30800	AT4G34670		AT2G02740
AT2G35920	AT4G00660	AT2G33435	AT4G18100		AT1G14410
AT1G14170	AT4G00830	AT2G37670	AT3G45030		AT3G01500
AT5G02610	AT5G47210	AT2G37890	AT3G47370		AT5G57870
AT1G18080	AT2G46780	AT2G39670	AT2G36160		AT1G43170
AT4G17390	AT4G38680	AT2G40930	AT3G11510		AT2G34040
AT5G13770	AT1G47490	AT2G41080	AT2G40590		AT4G20360
AT3G58700	AT2G01250	AT2G41470	AT2G40510		AT1G02840
AT5G55190	AT3G15010	AT2G41670	AT3G56340		AT4G27440
AT1G15690	AT2G02740	AT2G41960	AT3G49010		AT3G44890
AT4G36090	AT2G18510	AT3G01060	AT5G23900		AT5G14460
ATCG00270	AT4G24770	AT3G01430	AT1G07070		AT1G70770
AT2G25670	AT5G52040	AT3G02480	AT3G55750		AT5G07350
ATCG00340	At5g61780	AT3G03110	AT1G14320		AT3G47470
AT1G69620	AT1G33470	AT3G03470	AT1G26910		AT1G17220
AT2G28900	At1g48110	AT3G03770	AT1G66580		AT3G27850
AT3G56940	AT1G03457	AT3G05430	AT5G41520		AT4G09040
AT3G17465	AT5G07090	AT3G06150	AT1G48830		AT3G63140
AT1G68010	AT4G17520	AT3G06510	AT3G02560		AT3G06980
AT4G03280	AT5G40490	AT3G06980	AT5G16130		AT1G48410
AT3G62030	AT2G43970	AT3G07250	AT5G02870		AT3G13224
AT1G74970	AT2G47850	AT3G08970	AT3G49910		AT3G02830
AT3G49170	AT1G32790	AT3G09620	AT2G01250		AT2G33410
AT4G33010	AT3G56860	AT3G11440	AT2G44120		AT3G26420
AT4G11175	AT3G55770	AT3G14470	ATCG00900		AT4G37930
AT3G52990	At1g59359	AT3G14700	AT1G35680		AT2G38770
AT5G13630	At1g43190	AT3G17310	ATCG00830		AT3G58510
AT1G48110	AT4G36680	AT3G18670	ATCG00750		AT1G62390
AT3G01370	AT1G69250	AT3G22920	AT1G04480		AT3G23700
AT3G21300	AT5G19350	AT3G23070	AT4G27090		AT1G48920
AT3G15000	AT2G31610	AT3G23340	AT3G09500		AT1G56070
AT1G18540	AT5G51980	AT3G23605	AT3G55170		AT2G19730
AT3G09440	AT1G01080	AT3G24160	ATCG00330		AT3G49430
AT5G38430	AT1G22910	AT3G26500	ATCG00065/ATCG01230		AT3G09200
AT5G17790	AT4G24680	AT3G27600	AT2G36170		AT2G24060
AT5G63120	AT1G72370	AT3G28370	AT4G01310		AT1G07320
AT3G04760	AT5G64200	AT3G45510	AT2G33450		AT1G01080
AT2G35130	AT3G56150	AT3G45630	AT1G79850		AT5G14320
AT5G42950	At4g11420	AT3G46090	AT3G44890		AT3G25920
AT1G03130	AT5G59950	AT3G47570	AT3G25920		AT5G24490
AT1G30360	AT3G07660	AT3G47920	ATCG00790		AT2G21660
AT1G54410	AT3G49910	AT3G48830	ATCG00660		AT1G10580
AT4G12800	AT3G20250	AT3G53160	ATCG00810		AT5G13780
AT1G70070	AT1G02840	AT3G53800	ATCG00800		AT5G30510
AT4G30825	AT3G19760	AT3G54850	ATCG00380		AT2G19870
AT4G31210	AT3G62250	AT3G55000	ATCG00770		AT1G02150
ATCG00020	AT4G25880	AT3G55200	ATCG01020		AT2G42520
AT2G47400	AT3G10360	AT3G55600	AT2G33800		AT2G18510
AT2G37020	AT2G32080	AT3G57660	AT3G52590		AT3G26060
ATCG00280	AT3G13060	AT3G61670	AT1G26880		AT1G27090
ATCG00350	AT5G03280	AT3G62590	AT1G52300		AT4G30690
AT3G55280	AT1G74060	AT3G63070	AT3G16080		AT4G29060
AT5G10690	AT3G49010	AT4G00300	AT1G15250		AT1G49760
AT1G31330	AT3G50370	AT4G02070	AT1G69620		AT5G66860
AT5G47320	AT1G70770	AT4G02400	AT3G56910		AT5G40490
AT5G63420	AT4G16390	AT4G03100	AT1G29070		AT3G53460
AT2G47990	AT1G79270	AT4G03728	AT3G18740		AT2G37220
ATCG00470	AT4G39260	AT4G04790	AT3G54210		AT4G26650
AT1G33120	At2g38610	AT4G05470	AT4G34110		AT3G07810
AT4G25270	AT1G47500	AT4G07350	AT1G22760		AT1G29250
AT4G14301	AT3G49390	AT4G08870	AT2G23350		AT5G04280
AT5G38420	At1g04990	AT4G10260	AT1G71770		AT5G27770
AT4G32260	AT3G55460	AT4G11110	AT1G49760		AT2G35410
AT3G45140	AT2G17870	AT4G11160	AT2G29200		AT3G13460
AT1G65352	AT1G26110	AT4G14070	AT2G29190		AT2G34160
AT4G10340	AT4G31700	AT4G14290	AT2G29140		AT4G24770
AT1G78260	AT1G13730	AT4G14760	AT5G47010		AT5G60980
AT2G32080	At5g39570	AT4G14819	AT5G54900		AT2G23350
AT2G33450	AT3G09630	AT4G15215	AT1G11650		AT5G02530
AT1G15820	AT3G15680	AT4G16310	AT4G27000		AT5G60390
AT3G11510	AT1G48410	AT4G18180	AT1G49600		AT3G53430
AT3G62200	AT4G34670	AT4G21530	AT3G19130		AT2G34420
AT2G38140	AT1G14410	AT4G22790	AT1G47490		AT5G27120
ATCG00680	AT5G64140	AT4G24390	AT1G02840		AT1G12900
AT1G04410	AT1G29250	AT4G25030	AT3G53500		AT5G22060
AT5G17170	AT3G24830	AT4G26020	AT2G37340		AT3G52930
AT3G08580	AT5G47010	AT4G30400	AT4G31580		AT5G62300
AT1G23400	AT1G56070	AT4G31050	AT5G11170		AT1G23410
AT5G13270	AT3G14010	AT4G32450	AT5G11200		AT2G36460
AT1G67430	AT3G60240	AT4G33170	AT1G43190		AT3G52590
AT5G47620	AT2G25970	AT4G33610	AT4G13850		AT3G53420
AT3G29230	At3g26420	AT4G35380	AT2G21660		AT2G40290
AT2G39140	AT1G10590	AT4G37510	AT4G39260		AT3G26560
AT4G10610	AT5G41520	AT4G38250	AT1G07360		AT3G45780
AT4G35890	AT2G29140	AT4G38390	AT2G29580		AT1G51510
AT1G16720	AT1G07930	AT4G38760	AT5G07060		AT2G06850
AT5G55220	AT4g26650	AT5G06420	AT1G23860		AT3G16460
AT5G50920	AT3G03950	AT5G07280	AT3G61860		AT3G16420
AT3G59040	AT3G58510	AT5G07630	AT4G24770		AT4G28480
AT3G13570	AT4G36960	AT5G11380	AT4G38680		AT2G45960
AT2G20060	At1g67325	AT5G13010	AT3G53460		AT3G16230
ATCG00800	AT5G63120	AT5G13480	AT3G02830		AT4G16143
AT1G67090	AT4G36020	AT5G13650	AT3G03710		AT5G55670
AT1G67700	AT3G13580	AT5G15950	AT5G19350		AT5G20920
AT5G64840	AT1G14170	AT5G17280	AT5G55740		AT1G02140
AT4G25880	At5g15520	AT5G17770	AT3G22150		AT1G77180
AT1G45230	AT1G30460	AT5G18750	AT2G24590		AT1G06760
AT5G44340	At1g13020	AT5G21150	AT1G47500		AT1G09770
AT1G30610	AT4g09040	AT5G22950	AT2G37220		AT4G34450
AT5G01530	AT3G52380	AT5G24950	AT1G07940		AT3G50670
AT1G71260	AT5G53180	AT5G25060	AT1G07930		AT5G22650
AT2G19750	AT1G20970	AT5G25590	AT1G07920		AT1G72150
AT2G05070	AT5G30510	AT5G27630	AT5G60390		AT3G01540
AT5G04140	AT3G05560	AT5G34870	AT3G58510		AT3G62840
ATCG00330	AT1G29350	AT5G35810	AT2G42520		AT1G80410
AT1G09340	At3g54770	AT5G38530	AT3G58570		AT5G20950
AT3G13920	AT3G13990	AT5G38970	AT3G13920		AT4G28880
AT3G08940	AT2G29200	AT5G43310	AT1G54270		AT5G25460
AT1G74060	AT3G11400	AT5G43730	AT1G72730		AT1G72710
AT2G43030	AT2G38750	AT5G44850	AT1G48920		AT5G06160
AT4G26370	AT5G21160	AT5G44870	AT4G36020		AT5G64270
AT3G53170	AT3G49430	AT5G46360	AT2G17870		AT5G09440
AT5G35630	ATMG00560	AT5G47460	AT5G42310		AT5G28740
AT5G60670	AT4G01290	AT5G48860	AT4G31850		AT3G18790
AT3G01150	AT2G18940	AT5G49140	AT4G20360		AT5G03740
AT3G58680	AT1G27090	AT5G50270	AT2G32930		AT3G54540
AT2G40510	At4g28440	AT5G53700	AT2G47850		AT1G68560
AT1G15280	AT5G02870	AT5G55570	AT4G28440		AT2G22230
AT4G11220	AT5G25754	AT5G56820	AT2G18940		AT2G21390
AT4G01310	AT5G63260	AT5G57035	AT2G21060		AT1G78850
AT3G15190	AT3G09500	AT5G57910	AT3G06980		AT2G27100
AT2G13360	AT1G66260	AT5G59613	AT4G16390		AT2G39670
AT4G28080	AT3G57290	AT5G59860	AT5G26742		AT5G22330
AT1G76380	AT3G52660	AT5G63770	AT1G02150		AT3G09260
AT1G26460	AT1G74230	AT5G63920	AT1G04990		AT2G18740
AT1G80000	AT4G35890	AT5G65560	AT5G46580		AT3G55430
AT3G55750	AT3G23450	AT5G65990	AT3G06410		AT5G42080
AT1G79540	AT5G51120	ATMG00670	AT1G17220		AT1G49670
AT4G32720	AT4G31580	AT1G03840	AT3G11630		AT1G65260
AT2G27720	AT1G54490	AT1G06670	AT5G06290		AT1G78060
AT5G55740	AT4G29060	AT1G08520	AT5G09660		AT4G10750
AT1G29930	At1g53645	AT1G14850	AT4G18360		AT5G21105
AT2G27890	At3g13224	AT1G16260	AT4G27440		AT3G42170
AT3G57430	AT3G62240	AT1G18160	AT4G35090		AT3G13790
AT2G47110	AT5G42950	AT1G20080	AT3G26650		AT1G24360
AT3G10610	AT2G23930	AT1G32230	AT1G42970		AT1G33590
AT1G10170	AT3G18740	AT1G32330	AT3G45140		AT1G77510
AT1G59870	AT2G34480	AT1G33750	ATCG00270		AT2G42910
ATCG00180	AT5G61960	AT1G59870	ATCG00350		AT3G12290
AT4G11420	AT2G26280	AT1G60160	ATCG00340		AT3G46740
AT4G09650	AT1G80000	AT1G61140	ATCG01060		AT5G64260
AT1G48650	AT1G04820	AT1G61210	ATCG00020		AT4G31490
AT3G52140	At2g37230	AT1G63900	AT5G01600		AT4G31180
AT1G13930	AT3G17330	AT1G65980	AT1G20620		AT2G05920
AT2G24420	AT4G20890	AT1G68880	AT1G20020		AT5G49910
AT5G63190	AT5G57870	AT1G79880	AT1G12900		AT5G63400
AT2G33370	AT5G07290	AT2G17480	AT3G14420		AT1G20960
AT5G58190	AT5G15270	AT2G19120	AT3G14415		AT1G73720
AT1G15810	AT4G17390	AT2G21720	AT3G15360		AT3G46100
AT5G64140	AT3G21215	AT2G27900	ATCG00490		AT4G01050
AT3G61240	AT5G27850	AT2G28540	AT1G67090		AT4G09010
AT5G27270	AT1G76460	AT2G34400	AT5G38430		AT4G24270
AT5G47930	AT1G12800	AT3G02930	AT5G38420		AT5G09660
AT3G53020	AT5G52650	AT3G04490	AT5G38410		AT1G28290
ATCG00720	AT3G61240	AT3G07390	AT2G39730		AT5G26830
AT5G18550	AT3G13570	AT3G08020	AT3G01500		AT5G23060
AT5G02450	AT1G10170	AT3G10010	AT5G14740		AT2G39800
AT1G07210	AT3G17390	AT3G10950	AT4G38970		AT2G21330
AT1G10910	At5g55550	AT3G13160	AT2G21330		AT1G32060
AT3G63370	AT3G53420	AT3G13530	ATCG00480		AT4G35090
AT2G24090	AT3G16780	AT3G17470	AT5G24770		AT1G20020
AT1G14710	AT2G39260	AT3G17590	AT1G15690		AT5G25980
ATCG00380	At1g02150	AT3G20475	AT5G26000		AT5G64040
AT3G49390	AT5G60960	AT3G24840	ATCG00120		AT4G04640
AT1G76810	AT1G54270	AT3G25060	AT5G48375
AT4G11060	AT3G13300	AT3G25840	AT5G25980
AT1G71460	AT2G02160	AT3G49170	AT5G03740
AT1G73940	AT5G04800	AT3G50160	AT4G08870
AT3G53700	AT5G63650	AT4G01660	AT3G12780
AT5G08610	AT2G32000	AT4G08840	AT1G56190
ATCG00750	AT1G29400	AT4G11860	AT3G60750
AT1G20620	AT3G61690	AT4G18130	AT3G17390
AT3G27690	AT3G60240	AT4G19440	AT3G62030
AT3G05060	At4g35100	AT4G19660	AT3G25770
AT3G18390		AT4G20140	AT3G25760
ATCG01060	AT2G40290	AT4G20440	AT1G49780
ATCG00480	AT2G47680	AT4G20450	AT3G19380
AT1G73530	AT3G23700	AT4G26330	AT1G29930
AT2G42710	AT5G64100	AT4G28070	AT1G29920
AT3G16780	At5g66860	AT4G30662	AT5G66570
AT3G14010	AT1G31280	AT4G33600	AT1G79040
AT1G66580	AT2G03640	AT4G36420	AT5G64040
AT4G24330	AT5G58190	AT4G38495	ATCG00130
AT1G33330	AT5G66100	AT5G01870	ATCG00540
AT5G07290	AT5G20290	AT5G02500	ATCG00720
AT2G03640	AT2G22090	AT5G07270	ATCG00680
AT5G14520	ATCG00830	AT5G10690	ATCG00280
AT1G79080	AT4G38710	AT5G13130	ATCG00580
AT4G00100	AT1G20110	AT5G13670	ATCG00710
AT5G44320	AT1G49240	AT5G20220	ATCG01000
AT5G54180	AT5G61140	AT5G20710	ATCG00520
AT5G18570	AT5G20250	AT5G22330	ATCG00570
ATCG00120	AT3G58570	AT5G25170	AT4G04640
AT1G10840	AT3G26560	AT5G25770	AT5G01530
AT5G17920	At2g38770	AT5G38690	AT1G06680
AT5G02500	AT5G40420	AT5G43760	AT1G29910
AT4G18520	AT1G07360	AT5G44390	AT4G01050
AT1G23310	AT4G14300	AT5G47690	AT4G02770
AT5G66540	AT1G33980	AT5G49070	AT4G28750
AT3G12080	AT2G45620	AT5G55060	AT3G50820
AT4G27500	AT3G07110	AT5G55840	AT1G03130
AT3G51800	AT4G16830	AT5G57810	AT1G31330
AT4G39040	AT1G14320	AT5G58550	AT4G12800
AT1G15200	AT2G45810	AT5G64430	AT1G30380
AT3G50820	AT5G26742	AT5G66910	AT3G08940
AT3G26400	AT3G16400	ATCG00190	AT4G10340
AT1G29400	AT1G79090	AT1G03445	AT1G07790
AT3G62360	AT3G51950	AT1G12270	AT5G22880
AT1G06680	AT3G02830	AT1G16280	AT5G59910
AT1G11860	AT1G10200	AT1G18390	AT2G28720
AT5G56710	AT5G37720	AT1G22150	AT2G37470
AT3G19760	AT3G26400	AT1G30060	AT3G09480
AT5G04810	AT1G20620	AT1G31290	AT3G45980
AT3G07050	At1g15280	AT1G31460	AT3G46030
AT1G26630	AT4g38780	AT1G49650	AT5G02570
AT3G52660	AT1G09570	AT1G70200	AT5G54640
AT4G09730	AT1G55500	AT2G19750	AT1G51060
AT1G42970	At1g75560	AT2G26290	AT3G20670
AT2G33800	At1g71260	AT2G36620	AT4G27230
AT3G46630	AT1G60000	AT2G45810	AT1G08880
AT5G02830	At4g35785	AT3G03270	AT1G54690
AT5G60960	At2g45710	AT3G09260	AT3G54560
AT2G24590		AT3G26350	AT2G38810
AT4G14510	AT4G25740	AT3G30180	AT1G52740
AT4G34670	AT2G42680	AT3G51890	AT4G40030
AT2G36160	AT4G14990	AT3G52490	AT1G09200
AT2G39010	AT3G45780	AT3G55860	AT1G07660
AT3G19130	AT2G29190	AT4G02670	AT5G27670
AT5G54600	AT1G15250	AT4G12830	AT5G59870
AT5G53180	AT5G56030	AT4G13940	AT5G65350
AT2G46780	At3g27700	AT4G28650	AT1G75600
AT5G11200	AT1G11480	AT4G38200	AT3G08580
AT1G31280	AT3G51620	AT5G03150	AT3G11130
AT4G36690	AT3G58700	AT5G23110	AT3G08530
ATCG00490	AT5G59710	AT5G26280	AT4G27500
AT1G79850	AT2G37170	AT5G46210	AT1G67325
AT3G01920	AT1G51510	AT5G50920	AT5G64290
AT5G20290	AT5G02500	AT5G59320	AT5G14040
AT3G17040	At5g44020	AT1G13790	AT5G12860
AT4G29750	AT5G61020	AT2G17820	AT5G03280
AT5G61780	AT3G48440	AT2G45540	AT4G05320
AT2G39730	AT3G25920	AT3G16290	AT5G20620
AT2G30780	At3g21100	AT3G33530	AT4G05050
AT4G14880	AT2G32930	AT4G01030	AT5G03240
AT5G39850		AT4G27220	AT3G09790
AT5G59950	AT1G60770	AT4G32710	AT1G55060
AT5G55550		AT5G24900	AT4G02890
AT3G14100	AT5G49360	AT5G35735	AT2G35635
AT3G49470	AT5G17920	AT5G65740	AT5G37640
AT4G01290	AT5G27640	AT1G21160	AT3G12580
AT5G46430	AT2G06850	AT1G77120	AT5G02490
AT1G06190		AT2G09990	AT5G02500
AT1G15290	AT1G75660	AT2G20140	AT1G56410
AT5G66100	AT1G27430	AT3G46970	AT3G09440
ATMG01270	AT4G13940	AT4G30470	AT2G02740
AT1G54490		AT5G16540	AT3G56150
AT5G25490	AT3G16460	AT1G36160	AT4G11420
AT5G21222	AT1G76810	AT3G09500	AT1G09340
AT5G52470	At4g20980	AT5G44380	AT5G24780
AT4G34110		AT3G08670	AT4G24680
AT4G31850	AT1G29090	AT3G15020
AT5G61960	AT2G16600	AT3G55280
AT4G01990	AT3G16420	AT4G34870
AT5G64200	AT5G47620	AT5G02880
AT2G34250	At3g52930	AT1G58380
AT1G78630		AT2G19110
ATCG00830		AT3G45260
AT1G08380	AT3G62730	AT4G18470
AT5G26180	AT5G38410	AT3G09630
AT2G34620	At1g67090	AT1G66980
AT4G02990	At2g25210	AT3G57150
AT5G66520	AT1G76940	AT2G47610
AT3G26650	AT1G10580	AT1G59610
AT4G02230	AT1G55820	AT2G04400
AT1G70490	AT2G07698	AT3G14790
AT1G19720	AT3G15020	AT3G21110
AT1G30460	AT4G28480	AT3G43600
AT4G34910	AT4G15000	AT1G01790
AT1G54780	AT3G55280	AT1G04200
AT4G34620	AT4G13850	AT1G10950
AT3G44110	AT1G04270	AT1G17370
AT3G52880	AT3G49601	AT1G18800
AT5G50250	AT5G35180	AT1G20225
ATCG00810	AT3G01150	AT1G20340
AT5G16540	AT1G58470	AT1G20696
AT1G13730	AT3G59350	AT1G43190
AT3G50370	AT3G51800	AT1G49970
AT1G79040	AT2G45960	AT1G62820
ATCG00160	AT3G16230	AT1G63660
AT5G16130	At3g59970	AT1G73230
AT4G18100	AT4G20360	AT1G75790
AT2G02740	AT1G05190	AT2G01190
AT2G37230	AT3G07170	AT2G03510
AT1G22910	AT4G10970	AT2G03680
AT3G60240	At3g63550	AT2G07340
AT1G14410	AT1G01320	AT2G13820
AT1G55500	AT1G21750	AT2G16485
AT3G01500	AT1G03910	AT2G18740
AT2G09990	AT1G63940	AT2G22250
AT5G14040	AT1G70180	AT2G23120
AT3G62870	AT1G10840	AT2G24050
AT4G35610	AT1G64790	AT2G27150
AT2G45710	At1g65010	AT2G32730
AT3G58570	AT1G17640	AT2G35120
AT3G13490	AT1G32490	AT2G38770
AT2G47610	AT2G21580	AT2G38960
AT1G52980	AT2G28540	AT2G42210
AT5G02960	AT2G34680	AT2G44310
AT5G57870	AT2G42890	AT2G46540
AT1G20970	AT3G44110	AT3G05490
AT3G63160	AT3G23900	AT3G06410
AT5G38660	AT3G52140	AT3G07810
AT4G15640	AT3G25520	AT3G08030
AT2G22090	AT3G12640	AT3G10360
AT1G43170	AT3G12915	AT3G11910
AT5G46420	AT3G47340	AT3G13060
AT2G34040	AT3G60750	AT3G13772
AT4G20360	AT4G16143	AT3G16460
AT2G29200	AT4G10610	AT3G18190
AT4G29410	AT4G36690	AT3G20050
AT2G47850	AT4G32330	AT3G20500
AT5G15270	AT5G11170	AT3G20630
AT4G31230	AT5G18420	AT3G23750
AT1G02840	AT5G66010	AT3G25800
AT5G42980	AT5G61020	AT3G26400
AT3G02650	AT5G19950	AT3G27300
AT4G25730	AT5G27720	AT3G45010
AT1G07360	AT5G55670	AT3G49680
AT3G25150	AT5G20490	AT3G55430
AT1G31920	AT5G20920	AT3G56310
AT2G25210	AT5G39160	AT3G57890
AT5G52650	AT5G64390	AT3G58730
AT5G17870	AT1G71720	AT3G62360
AT1G35680	AT2G39900	AT4G02230
AT3G27700	AT4G16280	AT4G02520
AT2G39390	AT1G09810	AT4G03520
AT1G23860	AT1G62080	AT4G04910
AT5G04430	AT2G39740	AT4G10320
AT2G38610	AT1G60650	AT4G10610
AT4G27440	AT4G02720	AT4G11650
AT1G76010	AT2G47310	AT4G14930
AT5G02870	AT5G46630	AT4G15410
AT3G57490	AT4G36700	AT4G17510
ATCG00710	AT4G13930	AT4G22310
ATCG00780	AT4G14900	AT4G25340
AT4G26530	AT4G16100	AT4G26270
AT5G39980	AT1G02140	AT4G26700
AT3G54890	AT1G18080	AT4G27585
AT3G12780	At1g59610	AT4G35050
AT3G44890	AT4G18950	AT4G38370
AT4G20980	AT4G20020	AT5G01410
AT1G74230	AT4G31340	AT5G02240
AT1G13020	AT4G30800	AT5G03650
AT3G17330	AT4G39730	AT5G04885
AT5G14460	AT2G28190	AT5G08040
AT2G21580	AT1G09140	AT5G08360
AT2G16880	AT1G77180	AT5G11710
AT1G29910	AT2G41060	AT5G11810
AT5G48760	AT2G45800	AT5G13780
AT1G72370	AT1G23860	AT5G14180
AT1G70770	AT2G41740	AT5G15320
AT2G43810	AT1G02080	AT5G25540
AT3G13160	AT2G24050	AT5G28840
AT5G07350	AT2G29760	AT5G30510
AT5G15200	AT5G50460	AT5G38470
AT4G35785	AT1G03880	AT5G40370
ATCG00660	AT4G27150	AT5G42080
AT2G37920	AT4G27160	AT5G42270
AT5G15980	AT4G01850	AT5G45280
AT1G18485	ATCG00480	AT5G45620
AT4G31340	AT4G30190	AT5G49810
AT2G25970	AT4G27440	AT5G51830
AT5G15970	AT1G06760	AT5G57330
AT5G35680	AT1G20010	AT5G58290
AT5G35970	AT4G21710	AT5G66860
AT5G48910	AT5G13490	AT5G67360
AT2G41060	AT3G13920	ATCG00670
ATCG00790	AT3G52580	AT1G06410
NA	AT5G23740	AT1G06530
AT5G54760	AT4G39330	AT1G07670
AT4G39200	AT1G76180	AT1G10200
AT3G49010	AT3G55440	AT1G12230
AT2G43970	AT4G18100	AT1G15270
AT3G47470	AT5G39740	AT1G15480
AT1G17220	AT1G35680	AT1G15950
AT1G04270	ATCG01000	AT1G18070
AT1G02780	ATCG00780	AT1G19880
AT1G16445	ATCG00810	AT1G21720
AT5G47210	ATCG00750	AT1G27310
AT3G03950	AT3G60770	AT1G29700
AT1G53645	AT4G00100	AT1G31190
AT3G25520	AT3G61430	AT1G43790
AT3G27850	AT1G09770	AT1G44130
AT4G36020	AT3G61860	AT1G49670
AT4G09040	AT2G41900	AT1G52260
AT1G43190	AT1G01620	AT1G60420
AT5G13650	AT2G34160	AT1G60710
AT5G64670	AT1G27752	AT1G62640
AT3G63140	AT3G05900	AT1G65260
AT2G29140	AT1G07910	AT1G66680
AT4G00830	AT4G30270	AT1G71840
AT4G31580	AT4G26480	AT1G71860
AT3G05560	AT1G24300	AT1G72550
AT2G18940	AT5G04810	AT1G74210
AT3G53500	AT1G13690	AT1G76460
AT3G21215	AT2G22125	AT1G78060
AT1G14930	AT4G34450	AT1G79390
AT3G14600	AT1G03330	AT1G79500
AT2G42680	AT3G06970	AT2G01210
AT3G09630	AT2G46280	AT2G02050
AT3G06430	AT3G26730	AT2G02470
AT5G66470	AT1G36160	AT2G02500
AT3G06980	AT4G24510	AT2G13540
AT2G41840	AT5G43320	AT2G13560
AT3G13990	AT2G41430	AT2G17340
AT1G77940	AT5G01600	AT2G24940
AT3G10360	At1g62000	AT2G29530
AT1G48570	AT5G44310	AT2G30200
AT1G48410	AT5G27700	AT2G33845
AT3G13224	AT3G26520	AT2G35390
AT1G12800	AT1G26630	AT2G35490
AT1G50920	AT4G01700	AT2G38610
AT3G15010	AT1G57720	AT2G39990
AT3G22300	AT4G36130	AT2G40765
AT3G49910	AT5G42980	AT2G46505
AT4G24800	AT3G50670	AT2G47390
AT3G22330	AT4G34870	AT3G07480
AT5G42310	AT3G27660	AT3G08640
AT3G02830	AT5G54190	AT3G08947
AT3G13120	At4g27230	AT3G11770
AT2G33410	AT3G01190	AT3G12050
AT3G26420	AT5G17820	AT3G13235
AT1G73180	AT4G18040	AT3G13490
AT1G70600	AT3G50370	AT3G16420
AT1G73230	AT5G22650	AT3G18060
AT5G18380	AT2G36530	AT3G18490
AT1G17370	AT1G72150	AT3G20790
AT4G37930	At5g56870	AT3G26080
AT2G38770	At2g33800	AT3G27820
ATCG00650	AT2G26250	AT3G52140
AT1G59359	AT1G05250	AT3G56860
AT4G01037	AT5G48385	AT3G61220
AT1G64510	AT3G11050	AT3G63260
AT3G58510	ATCG01240	AT4G01150
AT1G15270	AT1G53720	AT4G10750
AT4G31700	AT5G48650	AT4G11120
AT1G20880	AT3G13222	AT4G11960
AT2G41100	AT2G42520	AT4G13360
AT5G65260	AT3G23090	AT4G16830
AT1G62390	AT3G15730	AT4G17170
AT3G24830	AT4G16500	AT4G19210
AT1G33470	AT3G06980	AT4G21470
AT3G56150	AT5G13570	AT4G22930
AT3G23700	At4g25550	AT4G23650
AT1G48920	AT5G12250	AT4G29410
AT3G28900	AT3G08620	AT4G30160
AT1G18630	At5g19190	AT4G32260
AT5G61030	AT5G08670	AT4G34150
AT5G54580	AT3G01540	AT4G35100
AT1G56070	AT5G55190	AT4G35850
AT3G18580	AT3G62840	AT4G39230
AT4G35850	AT3G20930	AT5G02450
AT5G27850	AT1G60900	AT5G05640
AT1G14320	AT1G54170	AT5G06870
AT3G15680	At2g29210	AT5G11950
AT4G16830	AT1G18070	AT5G17080
AT1G79270	AT5G18590	AT5G19350
AT4G31460	AT5G47930	AT5G20070
AT4G38680	AT1G22330	AT5G21105
AT2G19730	AT2G16860	AT5G23300
AT5G40950	AT5G28060	AT5G26260
ATCG00900	AT1G12080	AT5G38640
AT3G49430	AT4G29350	AT5G39410
AT1G11430	AT3G22230	AT5G41790
AT3G20230	AT4G28360	AT5G42100
AT3G20930	AT3G14080	AT5G45390
AT3G22230	AT1G73180	AT5G46740
AT3G03920	AT2G16940	AT5G48300
AT1G03457	AT4G32420	AT5G48960
AT5G61170	AT1G08680	AT5G49500
AT5G58530	AT1G60170	AT5G55730
AT5G24850	AT2G33830	AT5G58590
AT3G16080	AT2G20060	AT5G61510
AT1G66260	AT2G37340	AT5G61900
AT4G27090	At2g32850	AT5G62200
AT1G58300	AT3G13180	AT5G62575
AT3G26630	AT2G25140	AT5G63620
AT3G15590	AT3G52150	AT5G64200
AT5G26742	AT4G21450	AT5G64840
AT2G40590	AT5G11350	ATCG00340
AT5G04800	AT1G80410	ATMG00520
AT5G51980	AT1G31817	AT5G19820
AT4G16390	AT5G20950	AT4G24680
AT1G63780	AT1G12770	AT5G21160
AT3G53110	AT1G54010	AT3G03920
AT3G02080	AT4G26010	AT3G45300
AT1G05190	AT5G48180	AT3G42170
AT3G09200	AT3G21810	AT3G07110
AT3G11400	AT5G53620	AT3G13790
AT3G11940	AT5G05100	AT2G30860
AT3G46610	AT4G28880	AT1G18500
AT2G24060	AT5G64130	AT1G24360
AT3G07660	AT5G36230	AT1G80460
AT1G15480	AT3G53110	AT4G19710
AT1G07320	AT3G12680	AT5G41210
AT5G57960	At4g36880	AT1G29150
AT3G07110	AT1G70100	AT4G16690
AT4G39260	AT5G12440	AT1G02560
AT2G44120	AT5G25460	AT1G08480
AT1G01080	At5g18230	AT1G24510
AT1G26880	AT1G06190	AT1G30230
AT1G29370	AT5G58470	AT1G30630
AT3G04840	ATMG00080	AT1G33590
AT3G57180	AT4G20260	AT1G47420
AT5G07090	AT4G30170	AT1G50510
AT5G14320	AT5G43940	AT1G53500
AT4G38710	AT1G54460	AT1G65290
AT1G60650	AT5G46190	AT1G69250
AT2G05220	AT1G51580	AT1G74040
AT4G00660	AT1G12360	AT1G79990
AT3G09500	AT1G76860	AT2G19680
AT4G24680	AT1G27900	AT2G21250
AT4G30800	AT3G12130	AT2G41530
AT5G51120	AT1G72010	AT2G44100
AT3G25920	AT1G53650	AT2G44640
AT3G04920	AT3G08670	AT3G07720
AT5G24490	AT1G72710	AT3G18130
AT1G77030	AT1G26550	AT3G23300
AT3G12680	AT5G23900	AT3G23700
AT3G52150	AT5G05660	AT3G46560
AT2G17870	AT5G38600	AT3G54470
AT3G48930	AT5G06160	AT3G58510
AT2G21660	AT5G06770	AT4G00620
AT1G79090	At5g35980	AT4G09520
AT1G10580	AT5G47950	AT4G11260
AT3G27160	AT5G45330	AT4G15000
AT5G54900	AT5G48910	AT4G17530
AT4G15000	AT5G09840	AT4G21580
AT5G13780	AT5G46750	AT4G29360
AT5G08180	AT5G54580	AT4G30290
AT5G08650	AT5G49220	AT4G33510
AT3G13150	AT5G35530	AT4G36680
AT3G56340	AT5G53480	AT4G38630
AT5G39740	AT5G65260	AT5G04740
AT5G30510	AT5G66390	AT5G06320
AT2G19870	AT5G35680	AT5G08280
AT2G29190	AT5G13780	AT5G08530
AT3G48440	AT5G56140	AT5G16390
AT4G36130	AT5G44320	AT5G20950
AT2G34780	AT5G54310	AT5G25100
AT1G02150		AT5G26570
AT3G02560	AT5G39880	AT5G27120
AT3G47370	AT5G39850	AT5G36210
AT1G62750	AT5G51850	AT5G37830
AT3G07030	AT5G61865	AT5G40020
AT2G42520	AT5G64270	AT5G43960
AT1G76460	AT5G12120	AT5G54960
AT2G37270	AT5G61030	AT5G60160
AT1G55890	AT1G66380	AT5G62790
AT2G18510	AT4G25440	AT5G64140
AT2G20020	AT4G30890	AT1G80490
AT2G03270	AT5G41360	AT2G45300
AT4G28440	AT1G33990	AT3G01290
AT1G60770	AT1G75340	AT5G62740
AT3G22150	AT1G56660	AT1G02500
AT5G35530	AT1G19720	AT1G07370
AT3G26060	AT1G19900	AT1G09070
AT1G12770	AT5G09440	AT1G15120
AT1G27090	AT3G53500	AT1G52300
AT4G30690	AT1G67370	AT1G54100
AT1G04990	AT1G16870	AT1G55860
AT2G34480	AT1G18540	AT1G60000
AT4G29060	AT1G18630	AT1G60730
AT1G49760	AT3G57150	AT1G61520
AT5G61020	AT3G53040	AT1G68720
AT4G25740	AT3G52920	AT1G74910
AT1G80270	AT1G55890	AT1G77510
AT4G10970	AT3G24480	AT1G80410
AT2G03820	AT3G22270	AT2G16780
AT2G01250	AT3G18580	AT2G16950
AT3G10090	AT3G28900	AT2G17280
AT1G11650	AT3G13160	AT2G28100
AT1G13690	AT3G13150	AT2G38810
AT1G26110	AT3G15000	AT2G39770
AT1G20220	AT5G06320	AT2G40660
AT2G02160	AT5G28740	AT2G42910
AT5G10360	AT1G22060	AT2G47510
AT1G22780	AT1G17860	AT3G04790
AT5G66860	AT1G19600	AT3G10410
AT5G41520	AT1G19530	AT3G12290
AT2G18020	AT1G33680	AT3G13300
AT2G21060	AT1G32360	AT3G18740
AT4G36960	AT1G23290	AT3G23490
AT1G60000	AT3G17465	AT3G28500
AT1G54080	AT3G15590	AT3G46740
AT2G20450	AT5G46580	AT3G52200
AT5G63260	AT3G18790	AT3G52580
AT5G43960	AT3G20890	AT3G56150
AT4G37510	AT3G20800	AT3G56940
AT5G40490	AT5G49930	AT4G11420
AT4G14300	AT5G51300	AT4G13170
AT4G36680	AT3G14600	AT4G14800
AT4G17520	AT3G22440	AT4G20830
AT4G13850	AT3G22330	AT4G26900
AT1G69250	AT3G18130	AT4G28440
AT3G61860	At3g24517	AT5G02260
AT3G56860	AT3G15670	AT5G03630
AT1G17880	AT3G15610	AT5G11770
AT2G36620	AT3G46040	AT5G15450
AT5G37720	AT5G10350	AT5G23900
AT2G31610	AT3G63400	AT5G24400
AT3G18740	AT3G56340	AT5G26360
AT3G53460	AT5G03040	AT5G35160
AT2G37220	AT5G02610	AT5G37600
AT2G29760	AT5G04530	AT5G41520
AT4G26650	AT3G62870	AT5G42740
AT5G19350	AT3G62360	AT5G43060
AT3G07810	AT5G03740	AT5G43780
AT1G71720	AT5G01750	AT5G49460
AT2G32930	AT4G30290	AT5G49650
AT3G13580	AT4G29410	AT5G61790
AT5G52040	AT4G25610	AT4G26910
AT1G29965	AT4G25500	AT5G27770
AT3G20250	AT3G45630	AT3G05060
AT3G52380	AT3G54540	AT5G64260
AT3G53870	AT3G62200	AT1G66270
AT1G10590	AT3G53890	AT1G15750
AT1G29250	AT3G04500	AT1G56340
AT3G13060	AT1G27650	AT5G17330
AT1G32790	AT2G40300	AT5G50810
AT4G27000	AT2G38530	AT1G01080
AT2G33845	AT1G68560	AT1G04990
AT5G04280	AT1G30580	AT1G12000
AT5G23740	AT1G13190	AT1G26110
AT5G27770	AT3G57490	AT1G43800
AT2G35410	AT1G10290	AT1G54340
AT3G13460	AT1G16610	AT2G20360
AT1G47490	AT1G55310	AT2G46280
AT2G34160	AT3G07100	AT3G06720
AT3G06410	AT3G10770	AT3G10050
AT4G24770	AT1G17220	AT3G46040
AT5G60980	AT1G29030	AT3G46440
AT2G23350	AT2G22230	AT3G56340
AT1G48830	AT2G36160	AT3G61860
AT5G28060	AT2G35920	AT3G63460
AT1G22330	AT2G35880	AT4G13780
AT1G49600	AT2G24590	AT4G23710
AT5G02530	AT2G36880	AT4G24820
AT1G47500	AT2G21390	AT4G25100
AT3G45030	AT2G20280	AT4G25810
AT4G03110	AT2G25450	AT4G31490
AT3G44300	AT2G28380	AT4G39690
AT3G23810	AT1G54410	AT5G11110
ATCG01230	AT4G14790	AT5G12110
ATCG01300	AT3G06480	AT5G18170
AT5G60390	AT3G04610	AT5G34850
AT4G30160	AT3G10090	AT5G54810
AT1G80660	AT3G02220	AT5G62530
AT1G50250	AT1G65930	AT2G36160
AT5G56010	AT3G01570	AT3G49430
AT1G17470	AT4G24190	AT3G02530
AT2G47250	AT4G23670	AT1G64520
AT3G14415	AT4G31460	AT1G01090
AT4G17560	AT4G13170	AT1G08360
AT1G55490	AT4G31850	AT1G17745
AT4G16720	AT4G28990	AT1G22530
AT4G18730	AT4G27710	AT1G29250
AT5G20020	AT4g13350	AT1G70770
AT2G26080	AT1G15480	AT2G37760
AT2G36580	AT1G15200	AT3G11400
AT2G39460	AT1G15130	AT3G15010
AT1G33140	At2g22700	AT3G18820
AT3G23450	AT2G15690	AT4G00860
AT5G38410	AT4G02940	AT4G08390
AT2G39150	AT1G78850	AT5G03740
AT5G09930	AT2G27100	AT5G13520
AT4G20890	AT2G27040	AT5G23140
AT4G29390	AT1G54860	AT5G23540
AT1G54270	AT2G29580	AT5G26860
AT1G74050	AT1G03930	AT5G43010
AT3G53430	AT4G24690	AT3G05560
AT1G41880	AT1G66390	AT4G23100
AT2G27710		AT1G74260
AT2G34420		AT1G76010
AT2G27900		AT2G21170
AT3G62250		AT3G06050
AT1G15210		AT3G13460
AT3G04400		AT3G13860
AT5G27120		AT3G19760
AT1G70580		AT3G56240
AT5G66570		AT3G60245
AT4G26230		AT4G18430
AT5G11170		AT4G25880
AT2G07696		AT4G34350
AT4G25630		AT5G10840
AT1G29310		AT5G48650
ATCG01310		AT5G52840
AT1G12900		AT2G21580
AT1G23490		AT4G31180
AT5G22060		AT2G17390
AT3G48850		AT1G66240
AT3G61110		AT1G74010
AT3G09680		AT2G03640
AT2G29580		AT2G24020
AT4G31985		AT2G46880
AT5G54190		AT3G45960
AT3G52930		AT4G17520
AT1G29920		AT4G34110
AT2G04520		AT5G18550
AT4G27130		AT5G50250
AT5G09510		AT5G61030
AT3G27830		AT3G22230
AT4G09050		AT5G11170
AT2G37340		AT1G29090
AT1G23290		AT2G05790
AT1G58983		AT2G28680
AT1G56075		AT3G02830
AT3G05590		AT3G45970
ATCG01240		AT4G16390
AT1G52300		AT4G28510
AT3G11250		AT4G29840
AT1G29350		AT4G33090
AT2G17360		AT5G28060
AT2G04390		AT5G63680
AT5G03850		AT5G66120
AT1G34030		AT1G03230
AT1G36240		AT4G34670
AT1G29970		AT3G10090
AT5G62300		AT3G25150
ATCG00905		AT5G06860
AT1G07920		AT1G31180
AT2G41740		AT1G13020
AT5G56000		AT1G48830
AT5G45775		AT3G20390
AT5G20010		AT4G15802
AT4G10450		AT5G62390
AT5G23860		AT1G18540
AT5G56670		AT1G47260
AT1G72730		AT2G01250
AT2G37190		AT4G39730
AT1G74270		AT2G01970
AT2G27910		AT2G05920
AT1G23410		AT2G45290
AT1G04480		AT4G31580
AT2G19740		AT4G32470
AT3G62290		AT5G10450
AT2G36460		AT5G53560
AT1G54290		AT3G44310
AT1G58684		AT5G63570
AT1G15250		AT1G19920
AT2G40010		AT1G70730
AT4G09800		AT2G21060
AT1G07940		AT3G22330
AT2G42740		AT4G38680
AT2G29550		AT5G02870
AT1G07070		AT2G27730
AT2G36170		AT3G09200
AT2G47170		AT5G15650
AT5G03690		AT1G18080
AT1G58380		AT1G74060
AT5G62700		AT2G15860
AT3G52590		AT4G13430
AT1G10630		AT5G39850
AT5G62690		AT5G49910
AT4G05050		AT1G54080
AT5G14670		AT1G74030
AT1G75780		AT5G52650
AT4G05320		AT1G48030
AT1G20010		AT3G02360
AT2G35635		AT3G25860
AT5G12250		AT1G20220
AT1G31340		AT5G52470
AT4G02890		AT1G29900
AT1G55060		AT1G76160
AT5G03240		AT1G79920
AT5G20620		AT3G48930
AT1G65350		AT2G17870
AT5G37640		AT3G12500
		AT5G47210
		AT1G29910
		AT5G15090
		AT5G16130
		AT1G74230
		AT3G13930
		AT3G52380
		AT5G43940
		AT1G62020
		AT3G14100
		AT4G13850
		AT2G44350
		AT2G31390
		AT4G33030
		AT1G20440
		AT5G60980
		AT4G02930
		AT5G63400
		AT3G01280
		AT5G50850
		AT1G63940
		AT2G16060
		AT2G33210
		AT3G53460
		AT4G16155
		AT4G30270
		AT3G17390
		AT5G26710
		AT2G24200
		AT2G47110
		AT5G10360
		ATCG00120
		AT4G24770
		AT2G21660
		AT3G09820
		AT4G35830
		AT5G61780
		AT4G31700
		AT3G17240
		AT5G35530
		AT5G13420
		AT2G16570
		AT2G36460
		AT2G20420
		AT4G27000
		AT5G09590
		AT1G79550
		AT3G08530
		AT1G11650
		AT1G07750
		AT5G54900
		AT3G23990
		AT1G49760
		AT3G12780
		AT3G55440
		AT5G11670
		AT3G11130
		AT5G07350
		AT1G35720
		AT1G62380
		AT3G09440
		AT1G49600
		AT2G23350
		AT3G19130
		AT5G43330
		AT4G36020
		AT4G39260
		AT1G20620
		AT2G05710
		AT1G01410
		AT1G06380
		AT1G07320
		AT1G13160
		AT1G13330
		AT1G14600
		AT1G14810
		AT1G15440
		AT1G17960
		AT1G18090
		AT1G20700
		AT1G20960
		AT1G24090
		AT1G26630
		AT1G27840
		AT1G29880
		AT1G32750
		AT1G32810
		AT1G35515
		AT1G44900
		AT1G47128
		AT1G50250
		AT1G50680
		AT1G59760
		AT1G64550
		AT1G65230
		AT1G65930
		AT1G67140
		AT1G67700
		AT1G68200
		AT1G68560
		AT1G68710
		AT1G68990
		AT1G69440
		AT1G71390
		AT1G72090
		AT1G73720
		AT1G77680
		AT1G79350
		AT1G80580
		AT2G13370
		AT2G14050
		AT2G15430
		AT2G17510
		AT2G22300
		AT2G25970
		AT2G26080
		AT2G30130
		AT2G31650
		AT2G32940
		AT2G33540
		AT2G33800
		AT2G35040
		AT2G35370
		AT2G36720
		AT2G39140
		AT2G41020
		AT2G41500
		AT2G41870
		AT2G42510
		AT2G43030
		AT2G44710
		AT3G01600
		AT3G07050
		AT3G08010
		AT3G09210
		AT3G10650
		AT3G13550
		AT3G13920
		AT3G15270
		AT3G17330
		AT3G18090
		AT3G18870
		AT3G19670
		AT3G20150
		AT3G20310
		AT3G21100
		AT3G21540
		AT3G23370
		AT3G23900
		AT3G25660
		AT3G26060
		AT3G26120
		AT3G46100
		AT3G47950
		AT3G48960
		AT3G51950
		AT3G52660
		AT3G53420
		AT3G57050
		AT3G62610
		AT4G01050
		AT4G02790
		AT4G03280
		AT4G04890
		AT4G09010
		AT4G10920
		AT4G15890
		AT4G17610
		AT4G18300
		AT4G18810
		AT4G19610
		AT4G22890
		AT4G24270
		AT4G25560
		AT4G28990
		AT4G30690
		AT5G03940
		AT5G04895
		AT5G05130
		AT5G06000
		AT5G09660
		AT5G10770
		AT5G13290
		AT5G13550
		AT5G14580
		AT5G14610
		AT5G15270
		AT5G15700
		AT5G16680
		AT5G16750
		AT5G22100
		AT5G24050
		AT5G35210
		AT5G35970
		AT5G39770
		AT5G43810
		AT5G45140
		AT5G46250
		AT5G47010
		AT5G51795
		AT5G54910
		AT5G57980
		AT5G58130
		AT5G60040
		AT5G60990
		AT5G61960
		AT5G63960
		AT5G65630
		AT5G66130
		AT5G67240
		ATCG00800
		AT1G33120
		AT2G40030
		AT2G19560
		AT5G56140
		AT1G22780
		AT3G04770
		AT2G39260
		AT4G18100
		AT3G22690
		AT3G05590
		AT4G16720
		AT1G44575
		AT1G50200
		AT1G54780
		AT3G26420
		AT4G38220
		AT5G23120
		AT2G36850
		AT5G26742
		AT3G19170
		AT3G54050
		AT1G28290
		AT5G04280
		AT5G51820
		AT1G02780
		AT1G27400
		AT1G09620
		AT2G31610
		AT1G26880
		AT1G04270
		AT3G04920
		AT2G33410
		AT5G26830
		AT3G25520
		AT3G62870
		AT1G12840
		AT2G18020
		AT3G04840
		AT4G26970
		AT2G37220
		AT5G20290
		AT5G23060
		AT5G15200
		AT1G47490
		AT2G41840
		AT1G51200
		AT1G62750
		AT4G14680
		AT4G28750
		AT5G35170
		AT5G08690
		AT5G46290
		AT1G66280
		AT2G16600
		AT2G39800
		AT3G63140
		AT4G02770
		AT1G68010
		AT3G52930
		AT4G33010
		AT4G34131
		AT2G07698
		AT2G30950
		AT2G36530
		AT3G08940
		AT3G21180
		AT5G38420
		AT3G20250
		AT4G10340
		AT1G12900
		AT1G54270
		AT2G21330
		AT1G79040
		AT3G50820
		AT1G06680
		AT3G54890
		AT4G12800
		AT4G23670
		AT1G09340
		AT3G01500
		AT4G37930
		AT1G32060
		AT3G45140
		AT4G38970
		AT1G11860
		AT1G15820
		AT3G55800
		AT1G23310
		AT1G56070
		AT2G13360
		AT5G35630
		ATCG00280
		AT5G14740
		AT5G17920
