# Supplementary material for: Identification of Pri-miRNA Stem-Loop Interacting Proteins in Plants Using a Modified Version of the Csy4 CRISPR Endonuclease
Source: Int J Mol Sci. 2022 Aug 11;23(16):8961. doi: 10.3390/ijms23168961 (PMC9409100; doi:10.3390/ijms23168961)
Supplement: Supplementary file 1 [file ijms-23-08961-s001.zip › Table S4.xlsx]

## Sheet: 6xHis-MBP-Csy4
AGI	Protein name	Protein length	Application name	Domain id	Domain description	Start of domain match	End of domain match	E-value	INTERPRO id	INTERPRO domain name
AT1G01080	AT1G01080.1	293	HMMPfam	PF00076	RRM_1	110	180	2.7e-13	IPR000504	RNA recognition motif, RNP-1;Molecular Function: nucleic acid binding (GO:0003676
AT1G01080	AT1G01080.2	294	HMMPfam	PF00076	RRM_1	110	181	2.2e-12	IPR000504	RNA recognition motif, RNP-1;Molecular Function: nucleic acid binding (GO:0003676
AT1G01080	AT1G01080.1	293	HMMPfam	PF00076	RRM_1	214	282	1.3e-15	IPR000504	RNA recognition motif, RNP-1;Molecular Function: nucleic acid binding (GO:0003676
AT1G01080	AT1G01080.2	294	HMMPfam	PF00076	RRM_1	215	283	1.4e-15	IPR000504	RNA recognition motif, RNP-1;Molecular Function: nucleic acid binding (GO:0003676
AT1G02280	AT1G02280.1;AT1G02280.2	297	HMMPfam	PF04548	AIG1	38	200	3.39999999999999e-30	IPR006703	AIG1;Molecular Function: GTP binding (GO:0005525
AT1G02335	AT1G02335.1	219	HMMPfam	PF00190	Cupin_1	64	206	1.8e-27	IPR006045	Cupin 1;Molecular Function: nutrient reservoir activity (GO:0045735
AT1G03630	AT1G03630.2	399	HMMPfam	PF00106	adh_short	88	230	4.29999999999998e-18	IPR002198	Short-chain dehydrogenase/reductase SDR;Biological Process: metabolic process (GO:0008152), Molecular Function: oxidoreductase activity (GO:0016491
AT1G03630	AT1G03630.1	401	HMMPfam	PF00106	adh_short	90	232	5.4e-21	IPR002198	Short-chain dehydrogenase/reductase SDR;Biological Process: metabolic process (GO:0008152), Molecular Function: oxidoreductase activity (GO:0016491
AT1G04170	AT1G04170.1	465	HMMPfam	PF00009	GTP_EFTU	32	237	1.80000000000002e-38	IPR000795	Protein synthesis factor, GTP-binding;Molecular Function: GTPase activity (GO:0003924), Molecular Function: GTP binding (GO:0005525
AT1G04170	AT1G04170.1	465	HMMPfam	PF03144	GTP_EFTU_D2	269	351	1.5e-07	IPR004161	Translation elongation factor EFTu/EF1A, domain 2;Molecular Function: GTP binding (GO:0005525
AT1G04170	AT1G04170.1	465	HMMPfam	PF09173	eIF2_C	361	452	2.89999999999999e-33	IPR015256	Initiation factor eIF2 gamma, C-termina
AT1G04510	AT1G04510.2;AT1G04510.1	523	HMMPfam	PF00400	WD40	255	291	4.1e-07;5.2e-10	IPR019781	WD40 repeat, subgrou
AT1G04510	AT1G04510.2;AT1G04510.1	523	HMMPfam	PF00400	WD40	302	337	0.076;9.6e-05	IPR019781	WD40 repeat, subgrou
AT1G04510	AT1G04510.2;AT1G04510.1	523	HMMPfam	PF00400	WD40	358	382	78;0.098	IPR019781	WD40 repeat, subgrou
AT1G04510	AT1G04510.2;AT1G04510.1	523	HMMPfam	PF00400	WD40	389	423	4e-04;5e-07	IPR019781	WD40 repeat, subgrou
AT1G04510	AT1G04510.2;AT1G04510.1	523	HMMPfam	PF00400	WD40	481	508	24;0.027	IPR019781	WD40 repeat, subgrou
AT1G04510	AT1G04510.2;AT1G04510.1	523	HMMPfam	PF08606	Prp19	66	132	4.40000000000001e-28;5.5e-31	IPR013915	Pre-mRNA-splicing factor 1
AT1G09340	AT1G09340.1	378	HMMPfam	PF01370	Epimerase	56	273	1.6e-10	IPR001509	NAD-dependent epimerase/dehydratase;Molecular Function: catalytic activity (GO:0003824), Biological Process: cellular metabolic process (GO:0044237), Molecular Function: coenzyme binding (GO:0050662
AT1G11580	AT1G11580.1	557	HMMPfam	PF01095	Pectinesterase	246	542	1.2e-148	IPR000070	Pectinesterase, catalytic;Cellular Component: cell wall (GO:0005618), Molecular Function: pectinesterase activity (GO:0030599), Biological Process: cell wall modification (GO:0042545
AT1G11580	AT1G11580.1	557	HMMPfam	PF04043	PMEI	56	203	2e-25	IPR006501	Pectinesterase inhibitor;Molecular Function: enzyme inhibitor activity (GO:0004857), Molecular Function: pectinesterase activity (GO:0030599
AT1G14410	AT1G14410.1	263	HMMPfam	PF08536	Whirly	86	224	4.2e-64	IPR013742	Plant transcription facto
AT1G15820	AT1G15820.1	258	HMMPfam	PF00504	Chloroa_b-bind	70	246	5.10000000000004e-43	NULL	NUL
AT1G16030	AT1G16030.1	646	HMMPfam	PF00012	HSP70	8	617	0	IPR013126	Heat shock protein 7
AT1G18080	AT1G18080.1	327	HMMPfam	PF00400	WD40	7	44	0.15	IPR019781	WD40 repeat, subgrou
AT1G18080	AT1G18080.1	327	HMMPfam	PF00400	WD40	56	91	6.19999999999999e-06	IPR019781	WD40 repeat, subgrou
AT1G18080	AT1G18080.1	327	HMMPfam	PF00400	WD40	97	133	9.10000000000001e-08	IPR019781	WD40 repeat, subgrou
AT1G18080	AT1G18080.1	327	HMMPfam	PF00400	WD40	147	180	1.1e-08	IPR019781	WD40 repeat, subgrou
AT1G18080	AT1G18080.1	327	HMMPfam	PF00400	WD40	185	222	4.40000000000001e-07	IPR019781	WD40 repeat, subgrou
AT1G18080	AT1G18080.1	327	HMMPfam	PF00400	WD40	227	262	5.2	IPR019781	WD40 repeat, subgrou
AT1G18080	AT1G18080.1	327	HMMPfam	PF00400	WD40	298	322	0.22	IPR019781	WD40 repeat, subgrou
AT1G20960	AT1G20960.1;AT1G20960.2	2171	HMMPfam	PF00270	DEAD	507	683	3.5e-23	IPR011545	DNA/RNA helicase, DEAD/DEAH box type, N-terminal;Molecular Function: nucleic acid binding (GO:0003676), Molecular Function: ATP binding (GO:0005524), Molecular Function: ATP-dependent helicase activity (GO:0008026
AT1G20960	AT1G20960.1;AT1G20960.2	2171	HMMPfam	PF00270	DEAD	1353	1520	3.60000000000001e-21	IPR011545	DNA/RNA helicase, DEAD/DEAH box type, N-terminal;Molecular Function: nucleic acid binding (GO:0003676), Molecular Function: ATP binding (GO:0005524), Molecular Function: ATP-dependent helicase activity (GO:0008026
AT1G20960	AT1G20960.1;AT1G20960.2	2171	HMMPfam	PF00271	Helicase_C	805	883	3.5e-06	IPR001650	DNA/RNA helicase, C-terminal;Molecular Function: nucleic acid binding (GO:0003676), Molecular Function: helicase activity (GO:0004386), Molecular Function: ATP binding (GO:0005524
AT1G20960	AT1G20960.1;AT1G20960.2	2171	HMMPfam	PF02889	Sec63	1006	1310	8.39999999999977e-103	IPR004179	Sec63 domai
AT1G20960	AT1G20960.1;AT1G20960.2	2171	HMMPfam	PF02889	Sec63	1839	2158	7.90000000000016e-98	IPR004179	Sec63 domai
AT1G24360	AT1G24360.1	319	HMMPfam	PF00106	adh_short	78	245	3.29999999999997e-40	IPR002198	Short-chain dehydrogenase/reductase SDR;Biological Process: metabolic process (GO:0008152), Molecular Function: oxidoreductase activity (GO:0016491
AT1G28290	AT1G28290.2	315	HMMPfam	PF01190	Pollen_Ole_e_I	188	272	1.1e-18	IPR006041	Pollen Ole e 1 allergen/extensi
AT1G28290	AT1G28290.1	359	HMMPfam	PF01190	Pollen_Ole_e_I	232	316	1.1e-15	IPR006041	Pollen Ole e 1 allergen/extensi
AT1G30360	AT1G30360.1	724	HMMPfam	PF02714	DUF221	311	634	6.7999999999999e-91	IPR003864	Protein of unknown function DUF221;Cellular Component: membrane (GO:0016020
AT1G31330	AT1G31330.1	221	HMMPfam	PF02507	PSI_PsaF	48	220	8.49999999999995e-82	IPR003666	Photosystem I reaction centre protein PsaF, subunit III;Cellular Component: photosystem I reaction center (GO:0009538), Biological Process: photosynthesis (GO:0015979
AT1G31690	AT1G31690.1	677	HMMPfam	PF01179	Cu_amine_oxid	244	663	4.9e-148	IPR015798	Copper amine oxidase, C-terminal;Molecular Function: copper ion binding (GO:0005507), Molecular Function: amine oxidase activity (GO:0008131), Biological Process: amine metabolic process (GO:0009308), Molecular Function: quinone binding (GO:0048038), Biological Process: oxidation reduction (GO:0055114
AT1G31690	AT1G31690.1	677	HMMPfam	PF02727	Cu_amine_oxidN2	27	117	9.8e-21	IPR015800	Copper amine oxidase, N2-terminal;Molecular Function: copper ion binding (GO:0005507), Molecular Function: amine oxidase activity (GO:0008131), Biological Process: amine metabolic process (GO:0009308), Molecular Function: quinone binding (GO:0048038), Biological Process: oxidation reduction (GO:0055114
AT1G31690	AT1G31690.1	677	HMMPfam	PF02728	Cu_amine_oxidN3	123	215	9.5e-21	IPR015802	Copper amine oxidase, N3-terminal;Molecular Function: copper ion binding (GO:0005507), Molecular Function: amine oxidase activity (GO:0008131), Biological Process: amine metabolic process (GO:0009308), Molecular Function: quinone binding (GO:0048038), Biological Process: oxidation reduction (GO:0055114
AT1G32990	AT1G32990.1	222	HMMPfam	PF00298	Ribosomal_L11	140	208	1.6e-24	IPR020783	Ribosomal protein L11, C-terminal domain;Molecular Function: structural constituent of ribosome (GO:0003735), Cellular Component: ribosome (GO:0005840), Biological Process: translation (GO:0006412
AT1G32990	AT1G32990.1	222	HMMPfam	PF03946	Ribosomal_L11_N	77	135	1.3e-25	IPR020784	Ribosomal protein L11, N-terminal domai
AT1G33590	AT1G33590.1	477	HMMPfam	PF00560	LRR_1	127	149	0.69	IPR001611	Leucine-rich repeat;Molecular Function: protein binding (GO:0005515
AT1G33590	AT1G33590.1	477	HMMPfam	PF00560	LRR_1	202	220	0.16	IPR001611	Leucine-rich repeat;Molecular Function: protein binding (GO:0005515
AT1G33590	AT1G33590.1	477	HMMPfam	PF00560	LRR_1	224	245	0.53	IPR001611	Leucine-rich repeat;Molecular Function: protein binding (GO:0005515
AT1G33590	AT1G33590.1	477	HMMPfam	PF00560	LRR_1	273	294	0.079	IPR001611	Leucine-rich repeat;Molecular Function: protein binding (GO:0005515
AT1G33590	AT1G33590.1	477	HMMPfam	PF00560	LRR_1	437	456	0.22	IPR001611	Leucine-rich repeat;Molecular Function: protein binding (GO:0005515
AT1G33590	AT1G33590.1	477	HMMPfam	PF08263	LRRNT_2	29	67	3.8e-14	IPR013210	Leucine-rich repeat-containing N-terminal domain, type
AT1G33600	AT1G33600.1	478	HMMPfam	PF00560	LRR_1	223	245	110	IPR001611	Leucine-rich repeat;Molecular Function: protein binding (GO:0005515
AT1G33600	AT1G33600.1	478	HMMPfam	PF00560	LRR_1	249	268	160	IPR001611	Leucine-rich repeat;Molecular Function: protein binding (GO:0005515
AT1G33600	AT1G33600.1	478	HMMPfam	PF00560	LRR_1	274	293	550	IPR001611	Leucine-rich repeat;Molecular Function: protein binding (GO:0005515
AT1G33600	AT1G33600.1	478	HMMPfam	PF00560	LRR_1	297	313	640	IPR001611	Leucine-rich repeat;Molecular Function: protein binding (GO:0005515
AT1G33600	AT1G33600.1	478	HMMPfam	PF00560	LRR_1	437	457	10	IPR001611	Leucine-rich repeat;Molecular Function: protein binding (GO:0005515
AT1G33600	AT1G33600.1	478	HMMPfam	PF08263	LRRNT_2	30	68	9e-11	IPR013210	Leucine-rich repeat-containing N-terminal domain, type
AT1G33811	AT1G33811.1	370	HMMPfam	PF00657	Lipase_GDSL	35	350	2.70000000000002e-42	IPR001087	Lipase, GDSL;Biological Process: lipid metabolic process (GO:0006629), Molecular Function: hydrolase activity, acting on ester bonds (GO:0016788
AT1G41830	AT1G41830.1	542	HMMPfam	PF00394	Cu-oxidase	161	296	1.8e-41	IPR001117	Multicopper oxidase, type 1;Molecular Function: oxidoreductase activity (GO:0016491), Biological Process: oxidation reduction (GO:0055114
AT1G41830	AT1G41830.1	542	HMMPfam	PF07731	Cu-oxidase_2	398	513	1.1e-26	IPR011706	Multicopper oxidase, type 2;Molecular Function: copper ion binding (GO:0005507), Molecular Function: oxidoreductase activity (GO:0016491), Biological Process: oxidation reduction (GO:0055114
AT1G41830	AT1G41830.1	542	HMMPfam	PF07732	Cu-oxidase_3	35	148	2.4e-32	IPR011707	Multicopper oxidase, type 3;Molecular Function: copper ion binding (GO:0005507), Molecular Function: oxidoreductase activity (GO:0016491), Biological Process: oxidation reduction (GO:0055114
AT1G42970	AT1G42970.1	447	HMMPfam	PF00044	Gp_dh_N	83	235	1.6e-51	IPR020828	Glyceraldehyde 3-phosphate dehydrogenase, NAD(P) binding domai
AT1G42970	AT1G42970.1	447	HMMPfam	PF02672	CP12	427	447	3.5e-05	IPR003823	Protein of unknown function CP1
AT1G42970	AT1G42970.1	447	HMMPfam	PF02800	Gp_dh_C	240	397	3.8e-67	IPR020829	Glyceraldehyde 3-phosphate dehydrogenase, catalytic domai
AT1G48410	AT1G48410.1	1048	HMMPfam	PF02170	PAZ	388	523	1.5e-34	IPR003100	Argonaute/Dicer protein, PA
AT1G48410	AT1G48410.2;AT1G48410.3	1050	HMMPfam	PF02170	PAZ	390	525	1.2e-31	IPR003100	Argonaute/Dicer protein, PA
AT1G48410	AT1G48410.1	1048	HMMPfam	PF02171	Piwi	677	996	3.5e-112	IPR003165	Stem cell self-renewal protein Piw
AT1G48410	AT1G48410.2;AT1G48410.3	1050	HMMPfam	PF02171	Piwi	679	998	2.79999999999994e-109	IPR003165	Stem cell self-renewal protein Piw
AT1G48410	AT1G48410.1	1048	HMMPfam	PF08699	DUF1785	334	386	9.5e-24	IPR014811	Domain of unknown function DUF178
AT1G48410	AT1G48410.2;AT1G48410.3	1050	HMMPfam	PF08699	DUF1785	336	388	7.5e-21	IPR014811	Domain of unknown function DUF178
AT1G48920	AT1G48920.1	557	HMMPfam	PF00076	RRM_1	300	368	2.8e-11	IPR000504	RNA recognition motif, RNP-1;Molecular Function: nucleic acid binding (GO:0003676
AT1G48920	AT1G48920.1	557	HMMPfam	PF00076	RRM_1	403	470	6.70000000000001e-07	IPR000504	RNA recognition motif, RNP-1;Molecular Function: nucleic acid binding (GO:0003676
AT1G49750	AT1G49750.1	494	HMMPfam	PF00560	LRR_1	224	245	40	IPR001611	Leucine-rich repeat;Molecular Function: protein binding (GO:0005515
AT1G49750	AT1G49750.1	494	HMMPfam	PF00560	LRR_1	247	267	280	IPR001611	Leucine-rich repeat;Molecular Function: protein binding (GO:0005515
AT1G52400	AT1G52400.2	461	HMMPfam	PF00232	Glyco_hydro_1	42	460	3.4e-125	IPR001360	Glycoside hydrolase, family 1;Molecular Function: hydrolase activity, hydrolyzing O-glycosyl compounds (GO:0004553), Biological Process: carbohydrate metabolic process (GO:0005975
AT1G52400	AT1G52400.3;AT1G52400.1	528	HMMPfam	PF00232	Glyco_hydro_1	42	516	3.3e-152	IPR001360	Glycoside hydrolase, family 1;Molecular Function: hydrolase activity, hydrolyzing O-glycosyl compounds (GO:0004553), Biological Process: carbohydrate metabolic process (GO:0005975
AT1G54780	AT1G54780.1	285	HMMPfam	PF04536	DUF477	106	228	1.1e-06	IPR007621	Protein of unknown function DUF47
AT1G55210	AT1G55210.1;AT1G55210.2	187	HMMPfam	PF03018	Dirigent	43	186	1.40000000000001e-47	IPR004265	Plant disease resistance response protei
AT1G65590	AT1G65590.1	535	HMMPfam	PF00728	Glyco_hydro_20	182	486	2.50000000000001e-88	IPR015883	Glycoside hydrolase, family 20, catalytic core;Molecular Function: hydrolase activity, hydrolyzing O-glycosyl compounds (GO:0004553
AT1G65590	AT1G65590.1	535	HMMPfam	PF02838	Glyco_hydro_20b	104	180	4.9e-08	IPR015882	Beta-N-acetylhexosaminidase, subunit a/b;Molecular Function: beta-N-acetylhexosaminidase activity (GO:0004563), Biological Process: carbohydrate metabolic process (GO:0005975
AT1G65870	AT1G65870.1	189	HMMPfam	PF03018	Dirigent	43	189	6.19999999999994e-54	IPR004265	Plant disease resistance response protei
AT1G68560	AT1G68560.1	915	HMMPfam	PF01055	Glyco_hydro_31	264	755	0	IPR000322	Glycoside hydrolase, family 31;Molecular Function: hydrolase activity, hydrolyzing O-glycosyl compounds (GO:0004553), Biological Process: carbohydrate metabolic process (GO:0005975
AT1G72150	AT1G72150.1	573	HMMPfam	PF00650	CRAL_TRIO	320	462	7.20000000000002e-18	IPR001251	Cellular retinaldehyde-binding/triple function, C-termina
AT1G72150	AT1G72150.1	573	HMMPfam	PF03765	CRAL_TRIO_N	249	280	2.7e-05	IPR008273	Cellular retinaldehyde-binding/triple function, N-termina
AT1G72610	AT1G72610.1	208	HMMPfam	PF00190	Cupin_1	56	196	4.4e-26	IPR006045	Cupin 1;Molecular Function: nutrient reservoir activity (GO:0045735
AT1G74000	AT1G74000.1	329	HMMPfam	PF03088	Str_synth	148	235	9e-32	IPR018119	Strictosidine synthase, conserved region;Biological Process: biosynthetic process (GO:0009058), Molecular Function: strictosidine synthase activity (GO:0016844
AT1G77510	AT1G77510.1	508	HMMPfam	PF00085	Thioredoxin	31	138	1.4e-27	IPR013766	Thioredoxin domain;Biological Process: cell redox homeostasis (GO:0045454
AT1G77510	AT1G77510.1	508	HMMPfam	PF00085	Thioredoxin	374	478	1e-24	IPR013766	Thioredoxin domain;Biological Process: cell redox homeostasis (GO:0045454
AT1G78060	AT1G78060.1	767	HMMPfam	PF00933	Glyco_hydro_3	71	325	1.40000000000001e-47	IPR001764	Glycoside hydrolase, family 3, N-terminal;Molecular Function: hydrolase activity, hydrolyzing O-glycosyl compounds (GO:0004553), Biological Process: carbohydrate metabolic process (GO:0005975
AT1G78060	AT1G78060.1	767	HMMPfam	PF01915	Glyco_hydro_3_C	398	626	1.29999999999998e-50	IPR002772	Glycoside hydrolase, family 3, C-terminal;Molecular Function: hydrolase activity, hydrolyzing O-glycosyl compounds (GO:0004553), Biological Process: carbohydrate metabolic process (GO:0005975
AT1G78900	AT1G78900.1;AT1G78900.2	623	HMMPfam	PF00006	ATP-synt_ab	231	458	6.3e-111	IPR000194	ATPase, alpha/beta subunit, nucleotide-binding domain;Molecular Function: ATP binding (GO:0005524
AT1G78900	AT1G78900.1;AT1G78900.2	623	HMMPfam	PF00306	ATP-synt_ab_C	478	619	1.7e-26	IPR000793	ATPase, F1/V1/A1 complex, alpha/beta subunit, C-terminal;Biological Process: ATP synthesis coupled proton transport (GO:0015986), Molecular Function: hydrolase activity, acting on acid anhydrides, catalyzing transmembrane movement of substances (GO:0016820), Cellular Component: proton-transporting two-sector ATPase complex, catalytic domain (GO:0033178
AT1G78900	AT1G78900.1;AT1G78900.2	623	HMMPfam	PF02874	ATP-synt_ab_N	25	85	9e-14	IPR004100	ATPase, F1/V1/A1 complex, alpha/beta subunit, N-terminal;Biological Process: proton transport (GO:0015992), Cellular Component: proton-transporting two-sector ATPase complex (GO:0016469), Biological Process: ATP metabolic process (GO:0046034), Molecular Function: hydrogen ion transporting ATP synthase activity, rotational mechanism (GO:0046933), Molecular Function: proton-transporting ATPase acti…
AT2G01140	AT2G01140.1	391	HMMPfam	PF00274	Glycolytic	47	391	0	IPR000741	Fructose-bisphosphate aldolase, class-I;Molecular Function: fructose-bisphosphate aldolase activity (GO:0004332), Biological Process: glycolysis (GO:0006096
AT2G03980	AT2G03980.1	367	HMMPfam	PF00657	Lipase_GDSL	45	347	3.5e-20	IPR001087	Lipase, GDSL;Biological Process: lipid metabolic process (GO:0006629), Molecular Function: hydrolase activity, acting on ester bonds (GO:0016788
AT2G05920	AT2G05920.1	754	HMMPfam	PF00082	Peptidase_S8	119	577	1.1e-26	IPR000209	Peptidase S8/S53, subtilisin/kexin/sedolisin;Molecular Function: serine-type endopeptidase activity (GO:0004252), Biological Process: proteolysis (GO:0006508
AT2G05920	AT2G05920.1	754	HMMPfam	PF02225	PA	367	455	2.3e-14	IPR003137	Protease-associated P
AT2G05920	AT2G05920.1	754	HMMPfam	PF05922	Inhibitor_I9	28	102	4.40000000000001e-09	IPR010259	Proteinase inhibitor I9, subtilisin propeptide;Molecular Function: serine-type endopeptidase activity (GO:0004252), Molecular Function: identical protein binding (GO:0042802), Biological Process: negative regulation of catalytic activity (GO:0043086
AT2G06850	AT2G06850.1	296	HMMPfam	PF00722	Glyco_hydro_16	36	215	4.39999999999997e-57	IPR000757	Glycoside hydrolase, family 16;Molecular Function: hydrolase activity, hydrolyzing O-glycosyl compounds (GO:0004553), Biological Process: carbohydrate metabolic process (GO:0005975
AT2G06850	AT2G06850.1	296	HMMPfam	PF06955	XET_C	240	290	1.6e-16	IPR010713	Xyloglucan endo-transglycosylase, C-terminal;Cellular Component: cell wall (GO:0005618), Biological Process: cellular glucan metabolic process (GO:0006073), Molecular Function: xyloglucan:xyloglucosyl transferase activity (GO:0016762), Cellular Component: apoplast (GO:0048046
AT2G18960	AT2G18960.1	949	HMMPfam	PF00122	E1-E2_ATPase	98	319	8.10000000000001e-57	IPR008250	ATPase, P-type, ATPase-associated domain;Molecular Function: ATP binding (GO:0005524), Biological Process: ATP biosynthetic process (GO:0006754), Cellular Component: membrane (GO:0016020), Molecular Function: hydrolase activity, acting on acid anhydrides, catalyzing transmembrane movement of substances (GO:0016820
AT2G18960	AT2G18960.1	949	HMMPfam	PF00690	Cation_ATPase_N	16	79	2e-09	IPR004014	ATPase, P-type cation-transporter, N-terminal;Biological Process: ATP biosynthetic process (GO:0006754), Biological Process: cation transport (GO:0006812), Molecular Function: ATPase activity, coupled to transmembrane movement of ions, phosphorylative mechanism (GO:0015662), Cellular Component: membrane (GO:0016020
AT2G18960	AT2G18960.1	949	HMMPfam	PF00702	Hydrolase	323	600	5.20000000000001e-16	IPR005834	Haloacid dehalogenase-like hydrolase;Molecular Function: catalytic activity (GO:0003824), Biological Process: metabolic process (GO:0008152
AT2G19520	AT2G19520.1	507	HMMPfam	PF00400	WD40	226	248	31	IPR019781	WD40 repeat, subgrou
AT2G19520	AT2G19520.1	507	HMMPfam	PF00400	WD40	286	321	0.0066	IPR019781	WD40 repeat, subgrou
AT2G19520	AT2G19520.1	507	HMMPfam	PF00400	WD40	331	366	0.00011	IPR019781	WD40 repeat, subgrou
AT2G19520	AT2G19520.1	507	HMMPfam	PF00400	WD40	377	415	2.6e-05	IPR019781	WD40 repeat, subgrou
AT2G19520	AT2G19520.1	507	HMMPfam	PF12265	CAF1C_H4-bd	65	134	7.90000000000001e-17	IPR022052	Histone-binding protein RBBP
AT2G21330	AT2G21330.2	311	HMMPfam	PF00274	Glycolytic	55	308	1.4e-121	IPR000741	Fructose-bisphosphate aldolase, class-I;Molecular Function: fructose-bisphosphate aldolase activity (GO:0004332), Biological Process: glycolysis (GO:0006096
AT2G21330	AT2G21330.3	389	HMMPfam	PF00274	Glycolytic	55	389	7.5e-153	IPR000741	Fructose-bisphosphate aldolase, class-I;Molecular Function: fructose-bisphosphate aldolase activity (GO:0004332), Biological Process: glycolysis (GO:0006096
AT2G21330	AT2G21330.1	399	HMMPfam	PF00274	Glycolytic	55	399	5.6e-166	IPR000741	Fructose-bisphosphate aldolase, class-I;Molecular Function: fructose-bisphosphate aldolase activity (GO:0004332), Biological Process: glycolysis (GO:0006096
AT2G22230	AT2G22230.1	220	HMMPfam	PF07977	FabA	85	210	1.29999999999998e-34	IPR013114	Beta-hydroxyacyl-(acyl-carrier-protein) dehydratase, FabA/Fab
AT2G24280	AT2G24280.1	494	HMMPfam	PF05577	Peptidase_S28	53	473	3.49999999999995e-92	IPR008758	Peptidase S28;Biological Process: proteolysis (GO:0006508), Molecular Function: serine-type peptidase activity (GO:0008236
AT2G33150	AT2G33150.1	462	HMMPfam	PF00108	Thiolase_N	50	307	1.69999999999998e-80	IPR020616	Thiolase, N-terminal;Biological Process: metabolic process (GO:0008152), Molecular Function: transferase activity, transferring acyl groups other than amino-acyl groups (GO:0016747
AT2G33150	AT2G33150.1	462	HMMPfam	PF02803	Thiolase_C	315	438	8.30000000000004e-46	IPR020617	Thiolase, C-terminal;Biological Process: metabolic process (GO:0008152), Molecular Function: transferase activity, transferring acyl groups other than amino-acyl groups (GO:0016747
AT2G33340	AT2G33340.3;AT2G33340.1;AT2G33340.2	485;525	HMMPfam	PF00400	WD40	255	291	4.9e-08;6.9e-11	IPR019781	WD40 repeat, subgrou
AT2G33340	AT2G33340.3;AT2G33340.1;AT2G33340.2	485;525	HMMPfam	PF00400	WD40	301	337	0.001;1.4e-06	IPR019781	WD40 repeat, subgrou
AT2G33340	AT2G33340.3;AT2G33340.1;AT2G33340.2	485;525	HMMPfam	PF00400	WD40	357	381	140;0.19	IPR019781	WD40 repeat, subgrou
AT2G33340	AT2G33340.3;AT2G33340.1;AT2G33340.2	485;525	HMMPfam	PF00400	WD40	388	422	9.20000000000001e-05;1.3e-07	IPR019781	WD40 repeat, subgrou
AT2G33340	AT2G33340.1;AT2G33340.2	525	HMMPfam	PF00400	WD40	480	507	0.0033	IPR019781	WD40 repeat, subgrou
AT2G33340	AT2G33340.3;AT2G33340.1;AT2G33340.2	485;525	HMMPfam	PF08606	Prp19	66	132	2.7e-28;3.9e-31	IPR013915	Pre-mRNA-splicing factor 1
AT2G33530	AT2G33530.1	465	HMMPfam	PF00450	Peptidase_S10	39	457	1.5e-120	IPR001563	Peptidase S10, serine carboxypeptidase;Molecular Function: serine-type carboxypeptidase activity (GO:0004185), Biological Process: proteolysis (GO:0006508
AT2G34420	AT2G34420.1	265	HMMPfam	PF00504	Chloroa_b-bind	64	231	6.00000000000001e-47	NULL	NUL
AT2G34810	AT2G34810.1	540	HMMPfam	PF01565	FAD_binding_4	83	220	2.2e-21	IPR006094	FAD linked oxidase, N-terminal;Molecular Function: oxidoreductase activity (GO:0016491), Molecular Function: FAD binding (GO:0050660
AT2G34810	AT2G34810.1	540	HMMPfam	PF08031	BBE	479	537	3.1e-15	IPR012951	Berberine/berberine-like;Molecular Function: oxidoreductase activity (GO:0016491), Molecular Function: FAD binding (GO:0050660
AT2G35410	AT2G35410.1	308	HMMPfam	PF00076	RRM_1	97	165	1.4e-15	IPR000504	RNA recognition motif, RNP-1;Molecular Function: nucleic acid binding (GO:0003676
AT2G35410	AT2G35410.1	308	HMMPfam	PF00076	RRM_1	196	267	7.79999999999999e-14	IPR000504	RNA recognition motif, RNP-1;Molecular Function: nucleic acid binding (GO:0003676
AT2G36460	AT2G36460.2	267	HMMPfam	PF00274	Glycolytic	1	267	1.79999999999997e-128	IPR000741	Fructose-bisphosphate aldolase, class-I;Molecular Function: fructose-bisphosphate aldolase activity (GO:0004332), Biological Process: glycolysis (GO:0006096
AT2G36460	AT2G36460.1	358	HMMPfam	PF00274	Glycolytic	11	358	0	IPR000741	Fructose-bisphosphate aldolase, class-I;Molecular Function: fructose-bisphosphate aldolase activity (GO:0004332), Biological Process: glycolysis (GO:0006096
AT2G37220	AT2G37220.1	289	HMMPfam	PF00076	RRM_1	93	163	1.5e-20	IPR000504	RNA recognition motif, RNP-1;Molecular Function: nucleic acid binding (GO:0003676
AT2G37220	AT2G37220.1	289	HMMPfam	PF00076	RRM_1	206	276	1.1e-21	IPR000504	RNA recognition motif, RNP-1;Molecular Function: nucleic acid binding (GO:0003676
AT2G38040	AT2G38040.1;AT2G38040.2	769	HMMPfam	PF03255	ACCA	97	240	1.29999999999998e-60	IPR020582	Acetyl-CoA carboxylase, alpha subunit, conserved regio
AT2G39730	AT2G39730.2;AT2G39730.3;AT2G39730.1	446;441;474	HMMPfam	PF00004	AAA	163	304	6.40000000000001e-13;6.3e-13;9.2e-16	IPR003959	ATPase, AAA-type, core;Molecular Function: ATP binding (GO:0005524
AT2G40290	AT2G40290.1;AT2G40290.2;AT2G40290.3	344;241	HMMPfam	PF00575	S1	19	92	8.1e-10;4.3e-10	IPR003029	Ribosomal protein S1, RNA-binding domain;Molecular Function: RNA binding (GO:0003723
AT2G40290	AT2G40290.2;AT2G40290.3	241	HMMPfam	PF07541	EIF_2_alpha	129	226	5.40000000000002e-27	IPR011488	Eukaryotic translation initiation factor 2, alpha subunit;Molecular Function: RNA binding (GO:0003723), Molecular Function: translation initiation factor activity (GO:0003743), Cellular Component: eukaryotic translation initiation factor 2 complex (GO:0005850), Biological Process: translation (GO:0006412
AT2G40290	AT2G40290.1	344	HMMPfam	PF07541	EIF_2_alpha	129	260	4.5e-45	IPR011488	Eukaryotic translation initiation factor 2, alpha subunit;Molecular Function: RNA binding (GO:0003723), Molecular Function: translation initiation factor activity (GO:0003743), Cellular Component: eukaryotic translation initiation factor 2 complex (GO:0005850), Biological Process: translation (GO:0006412
AT2G42910	AT2G42910.1	337	HMMPfam	PF00156	Pribosyltran	172	277	0.00015	IPR000836	Phosphoribosyltransferase;Biological Process: nucleoside metabolic process (GO:0009116
AT2G45220	AT2G45220.1	511	HMMPfam	PF01095	Pectinesterase	206	497	0	IPR000070	Pectinesterase, catalytic;Cellular Component: cell wall (GO:0005618), Molecular Function: pectinesterase activity (GO:0030599), Biological Process: cell wall modification (GO:0042545
AT2G45220	AT2G45220.1	511	HMMPfam	PF04043	PMEI	27	171	1.3e-20	IPR006501	Pectinesterase inhibitor;Molecular Function: enzyme inhibitor activity (GO:0004857), Molecular Function: pectinesterase activity (GO:0030599
AT2G47470	AT2G47470.2;AT2G47470.3;AT2G47470.4;AT2G47470.1	266;323;335;361	HMMPfam	PF00085	Thioredoxin	25	128	5.09999999999998e-32;7.79999999999999e-32;8.40000000000001e-32;1.2e-34	IPR013766	Thioredoxin domain;Biological Process: cell redox homeostasis (GO:0045454
AT2G47470	AT2G47470.2;AT2G47470.3;AT2G47470.4;AT2G47470.1	266;323;335;361	HMMPfam	PF00085	Thioredoxin	143	247	2.7e-31;4.10000000000001e-31;4.40000000000001e-31;6.5e-34	IPR013766	Thioredoxin domain;Biological Process: cell redox homeostasis (GO:0045454
AT2G47470	AT2G47470.3	323	HMMPfam	PF07749	ERp29	264	306	0.014	IPR011679	Endoplasmic reticulum, protein ERp29, C-terminal;Cellular Component: endoplasmic reticulum (GO:0005783
AT2G47470	AT2G47470.1	361	HMMPfam	PF07749	ERp29	264	358	6.8e-28	IPR011679	Endoplasmic reticulum, protein ERp29, C-terminal;Cellular Component: endoplasmic reticulum (GO:0005783
AT2G47470	AT2G47470.4	335	HMMPfam	PF07749	ERp29	291	332	3.1e-08	IPR011679	Endoplasmic reticulum, protein ERp29, C-terminal;Cellular Component: endoplasmic reticulum (GO:0005783
AT3G02110	AT3G02110.1	473	HMMPfam	PF00450	Peptidase_S10	42	467	0	IPR001563	Peptidase S10, serine carboxypeptidase;Molecular Function: serine-type carboxypeptidase activity (GO:0004185), Biological Process: proteolysis (GO:0006508
AT3G02880	AT3G02880.1	627	HMMPfam	PF00069	Pkinase	349	609	4.9e-36	IPR017442	Serine/threonine-protein kinase-like domain;Molecular Function: protein kinase activity (GO:0004672), Molecular Function: ATP binding (GO:0005524), Biological Process: protein amino acid phosphorylation (GO:0006468
AT3G02880	AT3G02880.1	627	HMMPfam	PF00560	LRR_1	91	113	0.054	IPR001611	Leucine-rich repeat;Molecular Function: protein binding (GO:0005515
AT3G02880	AT3G02880.1	627	HMMPfam	PF08263	LRRNT_2	27	63	1.5e-08	IPR013210	Leucine-rich repeat-containing N-terminal domain, type
AT3G04120	AT3G04120.1	338	HMMPfam	PF00044	Gp_dh_N	6	156	1.7e-56	IPR020828	Glyceraldehyde 3-phosphate dehydrogenase, NAD(P) binding domai
AT3G04120	AT3G04120.1	338	HMMPfam	PF02800	Gp_dh_C	161	318	2.2e-74	IPR020829	Glyceraldehyde 3-phosphate dehydrogenase, catalytic domai
AT3G04600	AT3G04600.1;AT3G04600.2;AT3G04600.3	402	HMMPfam	PF00579	tRNA-synt_1b	87	373	6.00000000000001e-22;9.40000000000003e-21	IPR002305	Aminoacyl-tRNA synthetase, class Ib;Molecular Function: nucleotide binding (GO:0000166), Molecular Function: aminoacyl-tRNA ligase activity (GO:0004812), Molecular Function: ATP binding (GO:0005524), Cellular Component: cytoplasm (GO:0005737), Biological Process: translation (GO:0006412), Biological Process: tRNA aminoacylation for protein translation (GO:0006418
AT3G07810	AT3G07810.1;AT3G07810.2	494;495	HMMPfam	PF00076	RRM_1	8	69	2.7e-13;3.4e-16	IPR000504	RNA recognition motif, RNP-1;Molecular Function: nucleic acid binding (GO:0003676
AT3G07810	AT3G07810.1;AT3G07810.2	494;495	HMMPfam	PF00076	RRM_1	110	176	1.6e-15;2e-18	IPR000504	RNA recognition motif, RNP-1;Molecular Function: nucleic acid binding (GO:0003676
AT3G08940	AT3G08940.1	227	HMMPfam	PF00504	Chloroa_b-bind	62	166	1.9e-18	NULL	NUL
AT3G08940	AT3G08940.2	287	HMMPfam	PF00504	Chloroa_b-bind	62	257	1.2e-48	NULL	NUL
AT3G09260	AT3G09260.1	524	HMMPfam	PF00232	Glyco_hydro_1	37	511	0	IPR001360	Glycoside hydrolase, family 1;Molecular Function: hydrolase activity, hydrolyzing O-glycosyl compounds (GO:0004553), Biological Process: carbohydrate metabolic process (GO:0005975
AT3G10690	AT3G10690.1	950	HMMPfam	PF00521	DNA_topoisoIV	125	559	0	IPR002205	DNA topoisomerase, type IIA, subunit A/C-terminal;Molecular Function: DNA binding (GO:0003677), Molecular Function: DNA topoisomerase (ATP-hydrolyzing) activity (GO:0003918), Molecular Function: ATP binding (GO:0005524), Cellular Component: chromosome (GO:0005694), Biological Process: DNA topological change (GO:0006265
AT3G10690	AT3G10690.1	950	HMMPfam	PF03989	DNA_gyraseA_C	600	647	0.00029	IPR006691	DNA gyrase/topoisomerase IV, subunit A, C-terminal beta-pinwheel;Molecular Function: DNA binding (GO:0003677), Molecular Function: DNA topoisomerase activity (GO:0003916), Molecular Function: ATP binding (GO:0005524), Cellular Component: chromosome (GO:0005694), Biological Process: DNA topological change (GO:0006265
AT3G10690	AT3G10690.1	950	HMMPfam	PF03989	DNA_gyraseA_C	649	700	0.00026	IPR006691	DNA gyrase/topoisomerase IV, subunit A, C-terminal beta-pinwheel;Molecular Function: DNA binding (GO:0003677), Molecular Function: DNA topoisomerase activity (GO:0003916), Molecular Function: ATP binding (GO:0005524), Cellular Component: chromosome (GO:0005694), Biological Process: DNA topological change (GO:0006265
AT3G10690	AT3G10690.1	950	HMMPfam	PF03989	DNA_gyraseA_C	705	750	2.7	IPR006691	DNA gyrase/topoisomerase IV, subunit A, C-terminal beta-pinwheel;Molecular Function: DNA binding (GO:0003677), Molecular Function: DNA topoisomerase activity (GO:0003916), Molecular Function: ATP binding (GO:0005524), Cellular Component: chromosome (GO:0005694), Biological Process: DNA topological change (GO:0006265
AT3G10690	AT3G10690.1	950	HMMPfam	PF03989	DNA_gyraseA_C	754	800	5.3e-06	IPR006691	DNA gyrase/topoisomerase IV, subunit A, C-terminal beta-pinwheel;Molecular Function: DNA binding (GO:0003677), Molecular Function: DNA topoisomerase activity (GO:0003916), Molecular Function: ATP binding (GO:0005524), Cellular Component: chromosome (GO:0005694), Biological Process: DNA topological change (GO:0006265
AT3G10690	AT3G10690.1	950	HMMPfam	PF03989	DNA_gyraseA_C	825	870	0.00055	IPR006691	DNA gyrase/topoisomerase IV, subunit A, C-terminal beta-pinwheel;Molecular Function: DNA binding (GO:0003677), Molecular Function: DNA topoisomerase activity (GO:0003916), Molecular Function: ATP binding (GO:0005524), Cellular Component: chromosome (GO:0005694), Biological Process: DNA topological change (GO:0006265
AT3G10690	AT3G10690.1	950	HMMPfam	PF03989	DNA_gyraseA_C	882	928	0.00037	IPR006691	DNA gyrase/topoisomerase IV, subunit A, C-terminal beta-pinwheel;Molecular Function: DNA binding (GO:0003677), Molecular Function: DNA topoisomerase activity (GO:0003916), Molecular Function: ATP binding (GO:0005524), Cellular Component: chromosome (GO:0005694), Biological Process: DNA topological change (GO:0006265
AT3G12290	AT3G12290.1	299	HMMPfam	PF00763	THF_DHG_CYH	10	127	2.29999999999998e-39	IPR020630	Tetrahydrofolate dehydrogenase/cyclohydrolase, catalytic domain;Molecular Function: catalytic activity (GO:0003824), Biological Process: folic acid and derivative biosynthetic process (GO:0009396
AT3G12290	AT3G12290.1	299	HMMPfam	PF02882	THF_DHG_CYH_C	130	295	9.69999999999989e-66	IPR020631	Tetrahydrofolate dehydrogenase/cyclohydrolase, NAD(P)-binding domain;Molecular Function: catalytic activity (GO:0003824), Biological Process: folic acid and derivative biosynthetic process (GO:0009396
AT3G12700	AT3G12700.2	263	HMMPfam	PF00026	Asp	105	159	7.3e-10	IPR001461	Peptidase A1;Molecular Function: aspartic-type endopeptidase activity (GO:0004190), Biological Process: proteolysis (GO:0006508
AT3G12700	AT3G12700.1	461	HMMPfam	PF00026	Asp	105	457	4.5e-20	IPR001461	Peptidase A1;Molecular Function: aspartic-type endopeptidase activity (GO:0004190), Biological Process: proteolysis (GO:0006508
AT3G12800	AT3G12800.1	298	HMMPfam	PF00106	adh_short	14	186	6.1e-25	IPR002198	Short-chain dehydrogenase/reductase SDR;Biological Process: metabolic process (GO:0008152), Molecular Function: oxidoreductase activity (GO:0016491
AT3G13470	AT3G13470.1	596	HMMPfam	PF00118	Cpn60_TCP1	74	576	3.49999999999995e-115	IPR002423	Chaperonin Cpn60/TCP-1;Molecular Function: protein binding (GO:0005515), Molecular Function: ATP binding (GO:0005524), Biological Process: cellular protein metabolic process (GO:0044267
AT3G13750	AT3G13750.1	847	HMMPfam	PF01301	Glyco_hydro_35	41	345	1.29999999999998e-115	IPR001944	Glycoside hydrolase, family 35;Molecular Function: hydrolase activity, hydrolyzing O-glycosyl compounds (GO:0004553), Biological Process: carbohydrate metabolic process (GO:0005975
AT3G13750	AT3G13750.1	847	HMMPfam	PF02140	Gal_Lectin	769	846	1.5e-18	IPR000922	D-galactoside/L-rhamnose binding SUEL lectin;Molecular Function: sugar binding (GO:0005529
AT3G13790	AT3G13790.2	581	HMMPfam	PF00251	Glyco_hydro_32N	56	375	3.4e-112	IPR013148	Glycosyl hydrolases family 32, N-termina
AT3G13790	AT3G13790.1	584	HMMPfam	PF00251	Glyco_hydro_32N	56	378	2.59999999999995e-115	IPR013148	Glycosyl hydrolases family 32, N-termina
AT3G13790	AT3G13790.2	581	HMMPfam	PF08244	Glyco_hydro_32C	447	535	6.3e-22	IPR013189	Glycosyl hydrolase family 32, C-termina
AT3G13790	AT3G13790.1	584	HMMPfam	PF08244	Glyco_hydro_32C	450	538	5.09999999999998e-19	IPR013189	Glycosyl hydrolase family 32, C-termina
AT3G14310	AT3G14310.1	592	HMMPfam	PF01095	Pectinesterase	281	577	0	IPR000070	Pectinesterase, catalytic;Cellular Component: cell wall (GO:0005618), Molecular Function: pectinesterase activity (GO:0030599), Biological Process: cell wall modification (GO:0042545
AT3G14310	AT3G14310.1	592	HMMPfam	PF04043	PMEI	54	212	1.1e-29	IPR006501	Pectinesterase inhibitor;Molecular Function: enzyme inhibitor activity (GO:0004857), Molecular Function: pectinesterase activity (GO:0030599
AT3G15356	AT3G15356.1	271	HMMPfam	PF00139	Lectin_legB	20	270	6.90000000000007e-68	IPR001220	Legume lectin, beta chain;Molecular Function: binding (GO:0005488
AT3G16420	AT3G16420.1;AT3G16420.2;AT3G16420.3	298	HMMPfam	PF01419	Jacalin	14	142	1.99999999999999e-40	IPR001229	Mannose-binding lecti
AT3G16420	AT3G16420.1;AT3G16420.2;AT3G16420.3	298	HMMPfam	PF01419	Jacalin	163	295	6.80000000000006e-46	IPR001229	Mannose-binding lecti
AT3G16460	AT3G16460.1;AT3G16460.2	705	HMMPfam	PF01419	Jacalin	2	127	2.7e-26	IPR001229	Mannose-binding lecti
AT3G16460	AT3G16460.1;AT3G16460.2	705	HMMPfam	PF01419	Jacalin	264	395	2.99999999999998e-38	IPR001229	Mannose-binding lecti
AT3G16460	AT3G16460.1;AT3G16460.2	705	HMMPfam	PF01419	Jacalin	417	548	2.19999999999997e-42	IPR001229	Mannose-binding lecti
AT3G16460	AT3G16460.1;AT3G16460.2	705	HMMPfam	PF01419	Jacalin	571	702	2.1e-43	IPR001229	Mannose-binding lecti
AT3G16470	AT3G16470.1;AT3G16470.2;AT3G16470.3	451;297	HMMPfam	PF01419	Jacalin	13	142	1.9e-37;3.6e-41	IPR001229	Mannose-binding lecti
AT3G16470	AT3G16470.3	297	HMMPfam	PF01419	Jacalin	164	294	2.7e-44	IPR001229	Mannose-binding lecti
AT3G16470	AT3G16470.1;AT3G16470.2	451	HMMPfam	PF01419	Jacalin	167	296	2.1e-37	IPR001229	Mannose-binding lecti
AT3G16470	AT3G16470.1;AT3G16470.2	451	HMMPfam	PF01419	Jacalin	318	448	5.10000000000004e-41	IPR001229	Mannose-binding lecti
AT3G16530	AT3G16530.1	276	HMMPfam	PF00139	Lectin_legB	20	270	5.69999999999998e-71	IPR001220	Legume lectin, beta chain;Molecular Function: binding (GO:0005488
AT3G18080	AT3G18080.1	512	HMMPfam	PF00232	Glyco_hydro_1	41	511	0	IPR001360	Glycoside hydrolase, family 1;Molecular Function: hydrolase activity, hydrolyzing O-glycosyl compounds (GO:0004553), Biological Process: carbohydrate metabolic process (GO:0005975
AT3G20820	AT3G20820.1	365	HMMPfam	PF00560	LRR_1	153	174	670	IPR001611	Leucine-rich repeat;Molecular Function: protein binding (GO:0005515
AT3G20820	AT3G20820.1	365	HMMPfam	PF00560	LRR_1	176	196	180	IPR001611	Leucine-rich repeat;Molecular Function: protein binding (GO:0005515
AT3G20820	AT3G20820.1	365	HMMPfam	PF00560	LRR_1	297	315	240	IPR001611	Leucine-rich repeat;Molecular Function: protein binding (GO:0005515
AT3G20820	AT3G20820.1	365	HMMPfam	PF00560	LRR_1	322	340	190	IPR001611	Leucine-rich repeat;Molecular Function: protein binding (GO:0005515
AT3G20820	AT3G20820.1	365	HMMPfam	PF08263	LRRNT_2	22	61	1.9e-07	IPR013210	Leucine-rich repeat-containing N-terminal domain, type
AT3G26060	AT3G26060.1	216	HMMPfam	PF00578	AhpC-TSA	72	193	1.70000000000001e-40	IPR000866	Alkyl hydroperoxide reductase/ Thiol specific antioxidant/ Mal allergen;Molecular Function: antioxidant activity (GO:0016209), Molecular Function: oxidoreductase activity (GO:0016491
AT3G26060	AT3G26060.2	217	HMMPfam	PF00578	AhpC-TSA	73	194	2.2e-43	IPR000866	Alkyl hydroperoxide reductase/ Thiol specific antioxidant/ Mal allergen;Molecular Function: antioxidant activity (GO:0016209), Molecular Function: oxidoreductase activity (GO:0016491
AT3G26420	AT3G26420.1	245	HMMPfam	PF00076	RRM_1	10	79	5.90000000000001e-18	IPR000504	RNA recognition motif, RNP-1;Molecular Function: nucleic acid binding (GO:0003676
AT3G26420	AT3G26420.1	245	HMMPfam	PF00098	zf-CCHC	120	135	1.6e-05	IPR001878	Zinc finger, CCHC-type;Molecular Function: nucleic acid binding (GO:0003676), Molecular Function: zinc ion binding (GO:0008270
AT3G26650	AT3G26650.1	396	HMMPfam	PF00044	Gp_dh_N	63	213	1.9e-49	IPR020828	Glyceraldehyde 3-phosphate dehydrogenase, NAD(P) binding domai
AT3G26650	AT3G26650.1	396	HMMPfam	PF02800	Gp_dh_C	218	374	3.60000000000002e-65	IPR020829	Glyceraldehyde 3-phosphate dehydrogenase, catalytic domai
AT3G42170	AT3G42170.1	696	HMMPfam	PF02892	zf-BED	69	119	0.0018	IPR003656	Zinc finger, BED-type predicted;Molecular Function: DNA binding (GO:0003677
AT3G42170	AT3G42170.1	696	HMMPfam	PF05699	hATC	592	674	5.40000000000002e-26	IPR008906	HAT dimerisation;Molecular Function: protein dimerization activity (GO:0046983
AT3G46740	AT3G46740.1	818	HMMPfam	PF01103	Bac_surface_Ag	486	816	2.3e-25	IPR000184	Bacterial surface antigen (D15);Cellular Component: outer membrane (GO:0019867
AT3G46740	AT3G46740.1	818	HMMPfam	PF07244	Surf_Ag_VNR	381	447	0.00860000000000001	IPR010827	Surface antigen variable number;Cellular Component: outer membrane (GO:0019867
AT3G46780	AT3G46780.1	510	HMMPfam	PF05368	NmrA	94	207	4.4e-05	IPR008030	NmrA-lik
AT3G47470	AT3G47470.1	251	HMMPfam	PF00504	Chloroa_b-bind	64	223	7.4e-45	NULL	NUL
AT3G47800	AT3G47800.1	358	HMMPfam	PF01263	Aldose_epim	33	353	2.39999999999997e-93	IPR008183	Aldose 1-epimerase;Biological Process: carbohydrate metabolic process (GO:0005975), Molecular Function: isomerase activity (GO:0016853
AT3G51800	AT3G51800.1;AT3G51800.2;AT3G51800.3	392;401;385	HMMPfam	PF00557	Peptidase_M24	22	225	9.29999999999998e-27;1e-26;1.1e-29	IPR000994	Peptidase M24, structural domain;Biological Process: cellular process (GO:0009987
AT3G52500	AT3G52500.1	469	HMMPfam	PF00026	Asp	90	151	0.0068	IPR001461	Peptidase A1;Molecular Function: aspartic-type endopeptidase activity (GO:0004190), Biological Process: proteolysis (GO:0006508
AT3G52500	AT3G52500.1	469	HMMPfam	PF00026	Asp	187	464	4.20000000000001e-06	IPR001461	Peptidase A1;Molecular Function: aspartic-type endopeptidase activity (GO:0004190), Biological Process: proteolysis (GO:0006508
AT3G52590	AT3G52590.1	128	HMMPfam	PF00240	ubiquitin	6	74	9.20000000000002e-32	IPR000626	Ubiquiti
AT3G52590	AT3G52590.1	128	HMMPfam	PF01020	Ribosomal_L40e	78	128	2.2e-27	IPR001975	Ribosomal protein L40e;Molecular Function: structural constituent of ribosome (GO:0003735), Cellular Component: intracellular (GO:0005622), Cellular Component: ribosome (GO:0005840), Biological Process: translation (GO:0006412
AT3G52930	AT3G52930.1	358	HMMPfam	PF00274	Glycolytic	11	358	0	IPR000741	Fructose-bisphosphate aldolase, class-I;Molecular Function: fructose-bisphosphate aldolase activity (GO:0004332), Biological Process: glycolysis (GO:0006096
AT3G53420	AT3G53420.1;AT3G53420.2	287	HMMPfam	PF00230	MIP	31	266	2.39999999999997e-85	IPR000425	Major intrinsic protein;Molecular Function: transporter activity (GO:0005215), Biological Process: transport (GO:0006810), Cellular Component: membrane (GO:0016020
AT3G53460	AT3G53460.4	363	HMMPfam	PF00076	RRM_1	101	163	1.5e-16	IPR000504	RNA recognition motif, RNP-1;Molecular Function: nucleic acid binding (GO:0003676
AT3G53460	AT3G53460.3;AT3G53460.2;AT3G53460.1	342	HMMPfam	PF00076	RRM_1	101	171	1.4e-19	IPR000504	RNA recognition motif, RNP-1;Molecular Function: nucleic acid binding (GO:0003676
AT3G53460	AT3G53460.3;AT3G53460.2;AT3G53460.1	342	HMMPfam	PF00076	RRM_1	259	329	2.8e-20	IPR000504	RNA recognition motif, RNP-1;Molecular Function: nucleic acid binding (GO:0003676
AT3G53460	AT3G53460.4	363	HMMPfam	PF00076	RRM_1	280	350	3.1e-20	IPR000504	RNA recognition motif, RNP-1;Molecular Function: nucleic acid binding (GO:0003676
AT3G55220	AT3G55220.1	1214	HMMPfam	PF03178	CPSF_A	861	1180	4.49999999999996e-94	IPR004871	Cleavage/polyadenylation specificity factor, A subunit, C-terminal;Molecular Function: nucleic acid binding (GO:0003676), Cellular Component: nucleus (GO:0005634
AT3G56940	AT3G56940.2	332	HMMPfam	PF02915	Rubrerythrin	57	190	1.4e-40	IPR003251	Rubrerythrin;Molecular Function: metal ion binding (GO:0046872
AT3G56940	AT3G56940.1	409	HMMPfam	PF02915	Rubrerythrin	134	267	1.80000000000002e-37	IPR003251	Rubrerythrin;Molecular Function: metal ion binding (GO:0046872
AT3G62020	AT3G62020.2	191	HMMPfam	PF00190	Cupin_1	35	178	1.9e-25	IPR006045	Cupin 1;Molecular Function: nutrient reservoir activity (GO:0045735
AT3G62020	AT3G62020.1	220	HMMPfam	PF00190	Cupin_1	64	207	3.8e-28	IPR006045	Cupin 1;Molecular Function: nutrient reservoir activity (GO:0045735
AT3G62120	AT3G62120.1;AT3G62120.2	530	HMMPfam	PF00587	tRNA-synt_2b	92	248	8.5e-15	IPR002314	Aminoacyl-tRNA synthetase, class II (G/ H/ P/ S), conserved domain;Molecular Function: nucleotide binding (GO:0000166), Molecular Function: aminoacyl-tRNA ligase activity (GO:0004812), Molecular Function: ATP binding (GO:0005524), Cellular Component: cytoplasm (GO:0005737), Biological Process: translation (GO:0006412), Biological Process: tRNA aminoacylation for protein translation (GO:0006418
AT3G62120	AT3G62120.1;AT3G62120.2	530	HMMPfam	PF03129	HGTP_anticodon	334	431	5.90000000000001e-18	IPR004154	Anticodon-binding;Molecular Function: aminoacyl-tRNA ligase activity (GO:0004812), Molecular Function: ATP binding (GO:0005524), Biological Process: translation (GO:0006412
AT3G62120	AT3G62120.1;AT3G62120.2	530	HMMPfam	PF09180	ProRS-C_1	457	530	4.00000000000001e-21	IPR016061	Prolyl-tRNA synthetase, class II, C-terminal;Molecular Function: nucleotide binding (GO:0000166), Molecular Function: proline-tRNA ligase activity (GO:0004827), Molecular Function: ATP binding (GO:0005524), Cellular Component: cytoplasm (GO:0005737), Biological Process: translation (GO:0006412), Biological Process: prolyl-tRNA aminoacylation (GO:0006433
AT3G63140	AT3G63140.1	406	HMMPfam	PF01370	Epimerase	157	300	0.00045	IPR001509	NAD-dependent epimerase/dehydratase;Molecular Function: catalytic activity (GO:0003824), Biological Process: cellular metabolic process (GO:0044237), Molecular Function: coenzyme binding (GO:0050662
AT4G00430	AT4G00430.2	219	HMMPfam	PF00230	MIP	45	211	1.6e-53	IPR000425	Major intrinsic protein;Molecular Function: transporter activity (GO:0005215), Biological Process: transport (GO:0006810), Cellular Component: membrane (GO:0016020
AT4G00430	AT4G00430.1	287	HMMPfam	PF00230	MIP	45	274	1.6e-85	IPR000425	Major intrinsic protein;Molecular Function: transporter activity (GO:0005215), Biological Process: transport (GO:0006810), Cellular Component: membrane (GO:0016020
AT4G01130	AT4G01130.1	382	HMMPfam	PF00657	Lipase_GDSL	35	364	4.80000000000003e-41	IPR001087	Lipase, GDSL;Biological Process: lipid metabolic process (GO:0006629), Molecular Function: hydrolase activity, acting on ester bonds (GO:0016788
AT4G02770	AT4G02770.1	208	HMMPfam	PF02531	PsaD	71	207	3.99999999999998e-69	IPR003685	Photosystem I protein PsaD;Cellular Component: photosystem I reaction center (GO:0009538), Biological Process: photosynthesis (GO:0015979
AT4G04640	AT4G04640.1	373	HMMPfam	PF00231	ATP-synt	51	371	1e-95	IPR000131	ATPase, F1 complex, gamma subunit;Biological Process: ATP synthesis coupled proton transport (GO:0015986), Cellular Component: proton-transporting ATP synthase complex, catalytic core F(1) (GO:0045261), Molecular Function: hydrogen ion transporting ATP synthase activity, rotational mechanism (GO:0046933), Molecular Function: proton-transporting ATPase activity, rotational mechanism (GO:0046961
AT4G10340	AT4G10340.1	280	HMMPfam	PF00504	Chloroa_b-bind	82	243	4.10000000000004e-43	NULL	NUL
AT4G10750	AT4G10750.1	358	HMMPfam	PF03328	HpcH_HpaI	91	321	4.70000000000003e-61	IPR005000	HpcH/HpaI aldolase;Biological Process: cellular aromatic compound metabolic process (GO:0006725), Molecular Function: carbon-carbon lyase activity (GO:0016830
AT4G11010	AT4G11010.1	238	HMMPfam	PF00334	NDK	89	222	1.6e-50	IPR001564	Nucleoside diphosphate kinase, core;Molecular Function: nucleoside diphosphate kinase activity (GO:0004550), Molecular Function: ATP binding (GO:0005524), Biological Process: GTP biosynthetic process (GO:0006183), Biological Process: UTP biosynthetic process (GO:0006228), Biological Process: CTP biosynthetic process (GO:0006241
AT4G13340	AT4G13340.1	760	HMMPfam	PF08263	LRRNT_2	72	105	0.00089	IPR013210	Leucine-rich repeat-containing N-terminal domain, type
AT4G19410	AT4G19410.2	517	HMMPfam	PF03283	PAE	23	371	5.6e-148	NULL	NUL
AT4G19410	AT4G19410.1	391	HMMPfam	PF03283	PAE	23	372	0	NULL	NUL
AT4G20360	AT4G20360.1	476	HMMPfam	PF00009	GTP_EFTU	77	278	2.1e-60	IPR000795	Protein synthesis factor, GTP-binding;Molecular Function: GTPase activity (GO:0003924), Molecular Function: GTP binding (GO:0005525
AT4G20360	AT4G20360.1	476	HMMPfam	PF03143	GTP_EFTU_D3	375	474	1.80000000000002e-36	IPR004160	Translation elongation factor EFTu/EF1A, C-terminal;Molecular Function: GTP binding (GO:0005525
AT4G20360	AT4G20360.1	476	HMMPfam	PF03144	GTP_EFTU_D2	302	371	7.79999999999999e-15	IPR004161	Translation elongation factor EFTu/EF1A, domain 2;Molecular Function: GTP binding (GO:0005525
AT4G21150	AT4G21150.2	678	HMMPfam	PF05817	Ribophorin_II	4	672	1.2e-240	IPR008814	Ribophorin II;Molecular Function: dolichyl-diphosphooligosaccharide-protein glycotransferase activity (GO:0004579), Cellular Component: endoplasmic reticulum membrane (GO:0005789), Cellular Component: oligosaccharyltransferase complex (GO:0008250), Biological Process: protein amino acid N-linked glycosylation via asparagine (GO:0018279
AT4G21150	AT4G21150.1;AT4G21150.3	691	HMMPfam	PF05817	Ribophorin_II	5	685	0	IPR008814	Ribophorin II;Molecular Function: dolichyl-diphosphooligosaccharide-protein glycotransferase activity (GO:0004579), Cellular Component: endoplasmic reticulum membrane (GO:0005789), Cellular Component: oligosaccharyltransferase complex (GO:0008250), Biological Process: protein amino acid N-linked glycosylation via asparagine (GO:0018279
AT4G24350	AT4G24350.2	242	HMMPfam	PF01048	PNP_UDP_1	10	237	1.8e-35	IPR000845	Nucleoside phosphorylase;Molecular Function: catalytic activity (GO:0003824), Biological Process: nucleoside metabolic process (GO:0009116
AT4G24350	AT4G24350.1	336	HMMPfam	PF01048	PNP_UDP_1	48	331	3.40000000000004e-44	IPR000845	Nucleoside phosphorylase;Molecular Function: catalytic activity (GO:0003824), Biological Process: nucleoside metabolic process (GO:0009116
AT4G24770	AT4G24770.1	329	HMMPfam	PF00076	RRM_1	152	221	1.9e-19	IPR000504	RNA recognition motif, RNP-1;Molecular Function: nucleic acid binding (GO:0003676
AT4G24770	AT4G24770.1	329	HMMPfam	PF00076	RRM_1	246	316	6.7e-23	IPR000504	RNA recognition motif, RNP-1;Molecular Function: nucleic acid binding (GO:0003676
AT4G24780	AT4G24780.1;AT4G24780.2	408	HMMPfam	PF00544	Pec_lyase_C	130	325	6.5e-64	IPR002022	Pectate lyase/Amb allerge
AT4G25900	AT4G25900.1	318	HMMPfam	PF01263	Aldose_epim	42	307	2.89999999999999e-59	IPR008183	Aldose 1-epimerase;Biological Process: carbohydrate metabolic process (GO:0005975), Molecular Function: isomerase activity (GO:0016853
AT4G27440	AT4G27440.1;AT4G27440.2	401	HMMPfam	PF00106	adh_short	90	231	1.6e-18	IPR002198	Short-chain dehydrogenase/reductase SDR;Biological Process: metabolic process (GO:0008152), Molecular Function: oxidoreductase activity (GO:0016491
AT4G29060	AT4G29060.1;AT4G29060.2	953;709	HMMPfam	PF00575	S1	135	205	2.4e-15;2.1e-18	IPR003029	Ribosomal protein S1, RNA-binding domain;Molecular Function: RNA binding (GO:0003723
AT4G29060	AT4G29060.1;AT4G29060.2	953;709	HMMPfam	PF00575	S1	244	312	7.59999999999999e-06;6.6e-09	IPR003029	Ribosomal protein S1, RNA-binding domain;Molecular Function: RNA binding (GO:0003723
AT4G29060	AT4G29060.1;AT4G29060.2	953;709	HMMPfam	PF00627	UBA	519	556	6.1e-05;5.4e-08	IPR000449	Ubiquitin-associated/translation elongation factor EF1B, N-termina
AT4G29060	AT4G29060.1	953	HMMPfam	PF00627	UBA	758	794	4.1e-07	IPR000449	Ubiquitin-associated/translation elongation factor EF1B, N-termina
AT4G29060	AT4G29060.1	953	HMMPfam	PF00889	EF_TS	572	612	5.10000000000001e-08	IPR014039	Translation elongation factor EFTs/EF1B, dimerisation;Molecular Function: translation elongation factor activity (GO:0003746), Cellular Component: intracellular (GO:0005622), Biological Process: translational elongation (GO:0006414
AT4G29060	AT4G29060.2	709	HMMPfam	PF00889	EF_TS	572	616	1e-11	IPR014039	Translation elongation factor EFTs/EF1B, dimerisation;Molecular Function: translation elongation factor activity (GO:0003746), Cellular Component: intracellular (GO:0005622), Biological Process: translational elongation (GO:0006414
AT4G29060	AT4G29060.1	953	HMMPfam	PF00889	EF_TS	607	713	4.2e-23	IPR014039	Translation elongation factor EFTs/EF1B, dimerisation;Molecular Function: translation elongation factor activity (GO:0003746), Cellular Component: intracellular (GO:0005622), Biological Process: translational elongation (GO:0006414
AT4G29060	AT4G29060.2	709	HMMPfam	PF00889	EF_TS	613	707	6.7e-23	IPR014039	Translation elongation factor EFTs/EF1B, dimerisation;Molecular Function: translation elongation factor activity (GO:0003746), Cellular Component: intracellular (GO:0005622), Biological Process: translational elongation (GO:0006414
AT4G29060	AT4G29060.1	953	HMMPfam	PF00889	EF_TS	810	857	6.80000000000001e-10	IPR014039	Translation elongation factor EFTs/EF1B, dimerisation;Molecular Function: translation elongation factor activity (GO:0003746), Cellular Component: intracellular (GO:0005622), Biological Process: translational elongation (GO:0006414
AT4G29060	AT4G29060.1	953	HMMPfam	PF00889	EF_TS	845	951	4.70000000000001e-22	IPR014039	Translation elongation factor EFTs/EF1B, dimerisation;Molecular Function: translation elongation factor activity (GO:0003746), Cellular Component: intracellular (GO:0005622), Biological Process: translational elongation (GO:0006414
AT4G30610	AT4G30610.1	465	HMMPfam	PF00450	Peptidase_S10	37	458	0	IPR001563	Peptidase S10, serine carboxypeptidase;Molecular Function: serine-type carboxypeptidase activity (GO:0004185), Biological Process: proteolysis (GO:0006508
AT4G32720	AT4G32720.1;AT4G32720.2	433;404	HMMPfam	PF00076	RRM_1	123	185	1.9e-07;1.7e-07	IPR000504	RNA recognition motif, RNP-1;Molecular Function: nucleic acid binding (GO:0003676
AT4G32720	AT4G32720.1;AT4G32720.2	433;404	HMMPfam	PF05383	La	14	85	1.69999999999999e-19;1.6e-19	IPR006630	RNA-binding protein Lupus L
AT4G32720	AT4G32720.2	404	HMMPfam	PF08777	RRM_3	302	392	1.5e-22	IPR014886	RNA-binding moti
AT4G32720	AT4G32720.1	433	HMMPfam	PF08777	RRM_3	302	393	1.1e-22	IPR014886	RNA-binding moti
AT4G33220	AT4G33220.1	525	HMMPfam	PF01095	Pectinesterase	212	509	0	IPR000070	Pectinesterase, catalytic;Cellular Component: cell wall (GO:0005618), Molecular Function: pectinesterase activity (GO:0030599), Biological Process: cell wall modification (GO:0042545
AT4G33220	AT4G33220.1	525	HMMPfam	PF04043	PMEI	43	149	4.3e-14	IPR006501	Pectinesterase inhibitor;Molecular Function: enzyme inhibitor activity (GO:0004857), Molecular Function: pectinesterase activity (GO:0030599
AT4G33350	AT4G33350.2	242	HMMPfam	PF04278	Tic22	4	201	7.7e-63	IPR007378	Tic22-lik
AT4G33350	AT4G33350.1	268	HMMPfam	PF04278	Tic22	4	265	3.10000000000005e-86	IPR007378	Tic22-lik
AT4G33350	AT4G33350.2	242	HMMPfam	PF04278	Tic22	201	239	5.5e-09	IPR007378	Tic22-lik
AT4G34110	AT4G34110.1	629	HMMPfam	PF00076	RRM_1	38	108	5e-16	IPR000504	RNA recognition motif, RNP-1;Molecular Function: nucleic acid binding (GO:0003676
AT4G34110	AT4G34110.1	629	HMMPfam	PF00076	RRM_1	126	194	3.5e-19	IPR000504	RNA recognition motif, RNP-1;Molecular Function: nucleic acid binding (GO:0003676
AT4G34110	AT4G34110.1	629	HMMPfam	PF00076	RRM_1	217	285	6.90000000000001e-22	IPR000504	RNA recognition motif, RNP-1;Molecular Function: nucleic acid binding (GO:0003676
AT4G34110	AT4G34110.1	629	HMMPfam	PF00076	RRM_1	320	388	8.70000000000003e-19	IPR000504	RNA recognition motif, RNP-1;Molecular Function: nucleic acid binding (GO:0003676
AT4G34110	AT4G34110.1	629	HMMPfam	PF00658	PABP	543	611	1.9e-25	IPR002004	Polyadenylate-binding protein/Hyperplastic disc protein;Molecular Function: RNA binding (GO:0003723
AT4G35000	AT4G35000.1	287	HMMPfam	PF00141	peroxidase	19	224	1.5e-45	IPR002016	Haem peroxidase, plant/fungal/bacterial;Molecular Function: peroxidase activity (GO:0004601), Biological Process: response to oxidative stress (GO:0006979), Molecular Function: heme binding (GO:0020037), Biological Process: oxidation reduction (GO:0055114
AT4G35090	AT4G35090.2;AT4G35090.1	474;492	HMMPfam	PF00199	Catalase	18	399	0;5.1e-183	IPR018028	Catalase related subgrou
AT4G35090	AT4G35090.2	474	HMMPfam	PF06628	Catalase-rel	419	474	5.10000000000001e-10	IPR010582	Catalase-related immune responsive;Molecular Function: catalase activity (GO:0004096), Molecular Function: iron ion binding (GO:0005506), Biological Process: response to oxidative stress (GO:0006979), Molecular Function: heme binding (GO:0020037), Biological Process: oxidation reduction (GO:0055114
AT4G35090	AT4G35090.1	492	HMMPfam	PF06628	Catalase-rel	419	487	2.3e-19	IPR010582	Catalase-related immune responsive;Molecular Function: catalase activity (GO:0004096), Molecular Function: iron ion binding (GO:0005506), Biological Process: response to oxidative stress (GO:0006979), Molecular Function: heme binding (GO:0020037), Biological Process: oxidation reduction (GO:0055114
AT4G35100	AT4G35100.2;AT4G35100.1	280	HMMPfam	PF00230	MIP	30	259	2.4e-84	IPR000425	Major intrinsic protein;Molecular Function: transporter activity (GO:0005215), Biological Process: transport (GO:0006810), Cellular Component: membrane (GO:0016020
AT4G35630	AT4G35630.1	430	HMMPfam	PF00266	Aminotran_5	73	418	1.6e-49	IPR000192	Aminotransferase, class V/Cysteine desulfurase;Biological Process: metabolic process (GO:0008152
AT4G37930	AT4G37930.1	517	HMMPfam	PF00464	SHMT	55	452	0	IPR001085	Serine hydroxymethyltransferase;Molecular Function: glycine hydroxymethyltransferase activity (GO:0004372), Biological Process: glycine metabolic process (GO:0006544), Biological Process: L-serine metabolic process (GO:0006563
AT4G38970	AT4G38970.2	381	HMMPfam	PF00274	Glycolytic	54	308	1.29999999999998e-120	IPR000741	Fructose-bisphosphate aldolase, class-I;Molecular Function: fructose-bisphosphate aldolase activity (GO:0004332), Biological Process: glycolysis (GO:0006096
AT4G38970	AT4G38970.1	398	HMMPfam	PF00274	Glycolytic	54	398	2e-167	IPR000741	Fructose-bisphosphate aldolase, class-I;Molecular Function: fructose-bisphosphate aldolase activity (GO:0004332), Biological Process: glycolysis (GO:0006096
AT4G39640	AT4G39640.1;AT4G39640.2	572	HMMPfam	PF01019	G_glu_transpept	48	567	0	IPR000101	Gamma-glutamyltranspeptidase;Molecular Function: gamma-glutamyltransferase activity (GO:0003840
AT5G01530	AT5G01530.1	290	HMMPfam	PF00504	Chloroa_b-bind	65	260	2.8e-49	NULL	NUL
AT5G03350	AT5G03350.1	274	HMMPfam	PF00139	Lectin_legB	28	268	5.69999999999998e-67	IPR001220	Legume lectin, beta chain;Molecular Function: binding (GO:0005488
AT5G07350	AT5G07350.1;AT5G07350.2	991;1007	HMMPfam	PF00565	SNase	41	151	3.1e-09;4.1e-12	IPR006021	Staphylococcal nuclease (SNase-like);Molecular Function: nucleic acid binding (GO:0003676), Molecular Function: hydrolase activity, acting on ester bonds (GO:0016788
AT5G07350	AT5G07350.1;AT5G07350.2	991;1007	HMMPfam	PF00565	SNase	270	363	1.2e-09;1.6e-12	IPR006021	Staphylococcal nuclease (SNase-like);Molecular Function: nucleic acid binding (GO:0003676), Molecular Function: hydrolase activity, acting on ester bonds (GO:0016788
AT5G07350	AT5G07350.1;AT5G07350.2	991;1007	HMMPfam	PF00565	SNase	616	714	5.20000000000001e-11;6.8e-14	IPR006021	Staphylococcal nuclease (SNase-like);Molecular Function: nucleic acid binding (GO:0003676), Molecular Function: hydrolase activity, acting on ester bonds (GO:0016788
AT5G07350	AT5G07350.1;AT5G07350.2	991;1007	HMMPfam	PF00565	SNase	861	969	0.00027;3.5e-07	IPR006021	Staphylococcal nuclease (SNase-like);Molecular Function: nucleic acid binding (GO:0003676), Molecular Function: hydrolase activity, acting on ester bonds (GO:0016788
AT5G07350	AT5G07350.1;AT5G07350.2	991;1007	HMMPfam	PF00567	TUDOR	732	857	9.8e-28;1.3e-30	IPR008191	Maternal tudor protei
AT5G09440	AT5G09440.1	278	HMMPfam	PF04674	Phi_1	31	278	8.70000000000003e-101	IPR006766	Phosphate-induced protein
AT5G11420	AT5G11420.1	366	HMMPfam	PF04862	DUF642	42	362	0	IPR006946	Protein of unknown function DUF64
AT5G20630	AT5G20630.1	211	HMMPfam	PF00190	Cupin_1	71	200	1.69999999999999e-18	IPR006045	Cupin 1;Molecular Function: nutrient reservoir activity (GO:0045735
AT5G21105	AT5G21105.2	397	HMMPfam	PF00394	Cu-oxidase	11	144	2.4e-40	IPR001117	Multicopper oxidase, type 1;Molecular Function: oxidoreductase activity (GO:0016491), Biological Process: oxidation reduction (GO:0055114
AT5G21105	AT5G21105.3;AT5G21105.1	543;588	HMMPfam	PF00394	Cu-oxidase	171	335	3.6e-48;4.2e-48	IPR001117	Multicopper oxidase, type 1;Molecular Function: oxidoreductase activity (GO:0016491), Biological Process: oxidation reduction (GO:0055114
AT5G21105	AT5G21105.2	397	HMMPfam	PF07731	Cu-oxidase_2	244	369	9e-38	IPR011706	Multicopper oxidase, type 2;Molecular Function: copper ion binding (GO:0005507), Molecular Function: oxidoreductase activity (GO:0016491), Biological Process: oxidation reduction (GO:0055114
AT5G21105	AT5G21105.3	543	HMMPfam	PF07731	Cu-oxidase_2	435	539	2.3e-23	IPR011706	Multicopper oxidase, type 2;Molecular Function: copper ion binding (GO:0005507), Molecular Function: oxidoreductase activity (GO:0016491), Biological Process: oxidation reduction (GO:0055114
AT5G21105	AT5G21105.1	588	HMMPfam	PF07731	Cu-oxidase_2	435	560	1.9e-37	IPR011706	Multicopper oxidase, type 2;Molecular Function: copper ion binding (GO:0005507), Molecular Function: oxidoreductase activity (GO:0016491), Biological Process: oxidation reduction (GO:0055114
AT5G21105	AT5G21105.3;AT5G21105.1	543;588	HMMPfam	PF07732	Cu-oxidase_3	44	157	2.3e-43;2.6e-43	IPR011707	Multicopper oxidase, type 3;Molecular Function: copper ion binding (GO:0005507), Molecular Function: oxidoreductase activity (GO:0016491), Biological Process: oxidation reduction (GO:0055114
AT5G23060	AT5G23060.1	387	HMMPfam	PF00581	Rhodanese	229	338	0.00910000000000001	IPR001763	Rhodanese-lik
AT5G23210	AT5G23210.4	363	HMMPfam	PF00450	Peptidase_S10	8	352	6.60000000000002e-100	IPR001563	Peptidase S10, serine carboxypeptidase;Molecular Function: serine-type carboxypeptidase activity (GO:0004185), Biological Process: proteolysis (GO:0006508
AT5G23210	AT5G23210.2	403	HMMPfam	PF00450	Peptidase_S10	8	394	2.50000000000001e-116	IPR001563	Peptidase S10, serine carboxypeptidase;Molecular Function: serine-type carboxypeptidase activity (GO:0004185), Biological Process: proteolysis (GO:0006508
AT5G23210	AT5G23210.3	459	HMMPfam	PF00450	Peptidase_S10	56	448	1.39999999999997e-125	IPR001563	Peptidase S10, serine carboxypeptidase;Molecular Function: serine-type carboxypeptidase activity (GO:0004185), Biological Process: proteolysis (GO:0006508
AT5G23210	AT5G23210.1	499	HMMPfam	PF00450	Peptidase_S10	56	490	5e-145	IPR001563	Peptidase S10, serine carboxypeptidase;Molecular Function: serine-type carboxypeptidase activity (GO:0004185), Biological Process: proteolysis (GO:0006508
AT5G24490	AT5G24490.1	308	HMMPfam	PF02482	Ribosomal_S30AE	83	185	1.1e-19	IPR003489	Ribosomal protein S30Ae/sigma 54 modulation protein;Molecular Function: binding (GO:0005488), Biological Process: primary metabolic process (GO:0044238
AT5G25460	AT5G25460.1	369	HMMPfam	PF04862	DUF642	45	366	0	IPR006946	Protein of unknown function DUF64
AT5G25980	AT5G25980.1;AT5G25980.3	467	HMMPfam	PF00232	Glyco_hydro_1	52	466	1.10000000000001e-128	IPR001360	Glycoside hydrolase, family 1;Molecular Function: hydrolase activity, hydrolyzing O-glycosyl compounds (GO:0004553), Biological Process: carbohydrate metabolic process (GO:0005975
AT5G25980	AT5G25980.2	547	HMMPfam	PF00232	Glyco_hydro_1	52	525	2.4e-157	IPR001360	Glycoside hydrolase, family 1;Molecular Function: hydrolase activity, hydrolyzing O-glycosyl compounds (GO:0004553), Biological Process: carbohydrate metabolic process (GO:0005975
AT5G28540	AT5G28540.1	669	HMMPfam	PF00012	HSP70	37	644	0	IPR013126	Heat shock protein 7
AT5G30510	AT5G30510.1	416	HMMPfam	PF00575	S1	97	169	1.2e-05	IPR003029	Ribosomal protein S1, RNA-binding domain;Molecular Function: RNA binding (GO:0003723
AT5G30510	AT5G30510.1	416	HMMPfam	PF00575	S1	184	251	1.6e-07	IPR003029	Ribosomal protein S1, RNA-binding domain;Molecular Function: RNA binding (GO:0003723
AT5G30510	AT5G30510.1	416	HMMPfam	PF00575	S1	262	332	1.3e-19	IPR003029	Ribosomal protein S1, RNA-binding domain;Molecular Function: RNA binding (GO:0003723
AT5G38420	AT5G38420.1	181	HMMPfam	PF00101	RuBisCO_small	66	175	4.30000000000003e-38	IPR000894	Ribulose bisphosphate carboxylase, small chain;Biological Process: carbon fixation (GO:0015977), Molecular Function: ribulose-bisphosphate carboxylase activity (GO:0016984
AT5G38420	AT5G38420.1	181	HMMPfam	PF12338	RbcS	2	42	4.00000000000001e-17	NULL	NUL
AT5G40490	AT5G40490.1	423	HMMPfam	PF00076	RRM_1	44	109	1.3e-13	IPR000504	RNA recognition motif, RNP-1;Molecular Function: nucleic acid binding (GO:0003676
AT5G40490	AT5G40490.1	423	HMMPfam	PF00076	RRM_1	132	201	7.29999999999999e-15	IPR000504	RNA recognition motif, RNP-1;Molecular Function: nucleic acid binding (GO:0003676
AT5G44020	AT5G44020.1	272	HMMPfam	PF03767	Acid_phosphat_B	45	271	1.69999999999998e-69	IPR005519	Acid phosphatase (Class B);Molecular Function: acid phosphatase activity (GO:0003993
AT5G46070	AT5G46070.1	1082	HMMPfam	PF02263	GBP	51	310	2.2e-63	IPR015894	Guanylate-binding protein, N-terminal;Molecular Function: GTPase activity (GO:0003924), Molecular Function: GTP binding (GO:0005525
AT5G46070	AT5G46070.1	1082	HMMPfam	PF02841	GBP_C	314	618	3.2e-46	IPR003191	Guanylate-binding protein, C-terminal;Molecular Function: GTPase activity (GO:0003924), Molecular Function: GTP binding (GO:0005525
AT5G50920	AT5G50920.1	929	HMMPfam	PF00004	AAA	299	428	3.4e-12	IPR003959	ATPase, AAA-type, core;Molecular Function: ATP binding (GO:0005524
AT5G50920	AT5G50920.1	929	HMMPfam	PF02151	UVR	511	545	0.00012	IPR001943	UvrB/UvrC protein;Molecular Function: DNA binding (GO:0003677), Molecular Function: nuclease activity (GO:0004518), Biological Process: nucleotide-excision repair (GO:0006289
AT5G50920	AT5G50920.1	929	HMMPfam	PF02861	Clp_N	109	161	7.20000000000001e-15	IPR004176	Clp, N-terminal;Molecular Function: protein binding (GO:0005515), Biological Process: protein metabolic process (GO:0019538
AT5G50920	AT5G50920.1	929	HMMPfam	PF02861	Clp_N	185	236	1.8e-16	IPR004176	Clp, N-terminal;Molecular Function: protein binding (GO:0005515), Biological Process: protein metabolic process (GO:0019538
AT5G50920	AT5G50920.1	929	HMMPfam	PF07724	AAA_2	636	810	5.69999999999998e-53	IPR013093	ATPase, AAA-2;Molecular Function: ATP binding (GO:0005524
AT5G50920	AT5G50920.1	929	HMMPfam	PF10431	ClpB_D2-small	817	901	1.5e-21	IPR019489	Clp ATPase, C-termina
AT5G59970	AT5G59970.1	103	HMMPfam	PF00125	Histone	28	94	2.5e-14	IPR007125	Histone core;Molecular Function: DNA binding (GO:0003677
AT5G60390	AT5G60390.2;AT5G60390.3;AT5G60390.1	400;449	HMMPfam	PF00009	GTP_EFTU	7	222	1.29999999999998e-52;2.2e-55	IPR000795	Protein synthesis factor, GTP-binding;Molecular Function: GTPase activity (GO:0003924), Molecular Function: GTP binding (GO:0005525
AT5G60390	AT5G60390.2	400	HMMPfam	PF03143	GTP_EFTU_D3	322	378	6e-09	IPR004160	Translation elongation factor EFTu/EF1A, C-terminal;Molecular Function: GTP binding (GO:0005525
AT5G60390	AT5G60390.3;AT5G60390.1	449	HMMPfam	PF03143	GTP_EFTU_D3	322	429	1.5e-32	IPR004160	Translation elongation factor EFTu/EF1A, C-terminal;Molecular Function: GTP binding (GO:0005525
AT5G60390	AT5G60390.2;AT5G60390.3;AT5G60390.1	400;449	HMMPfam	PF03144	GTP_EFTU_D2	248	314	4.2e-13;6.4e-16	IPR004161	Translation elongation factor EFTu/EF1A, domain 2;Molecular Function: GTP binding (GO:0005525
AT5G61780	AT5G61780.1	985	HMMPfam	PF00565	SNase	42	153	4.9e-10	IPR006021	Staphylococcal nuclease (SNase-like);Molecular Function: nucleic acid binding (GO:0003676), Molecular Function: hydrolase activity, acting on ester bonds (GO:0016788
AT5G61780	AT5G61780.1	985	HMMPfam	PF00565	SNase	274	367	2.1e-09	IPR006021	Staphylococcal nuclease (SNase-like);Molecular Function: nucleic acid binding (GO:0003676), Molecular Function: hydrolase activity, acting on ester bonds (GO:0016788
AT5G61780	AT5G61780.1	985	HMMPfam	PF00565	SNase	414	549	0.061	IPR006021	Staphylococcal nuclease (SNase-like);Molecular Function: nucleic acid binding (GO:0003676), Molecular Function: hydrolase activity, acting on ester bonds (GO:0016788
AT5G61780	AT5G61780.1	985	HMMPfam	PF00565	SNase	612	711	1.7e-08	IPR006021	Staphylococcal nuclease (SNase-like);Molecular Function: nucleic acid binding (GO:0003676), Molecular Function: hydrolase activity, acting on ester bonds (GO:0016788
AT5G61780	AT5G61780.1	985	HMMPfam	PF00565	SNase	853	965	0.00013	IPR006021	Staphylococcal nuclease (SNase-like);Molecular Function: nucleic acid binding (GO:0003676), Molecular Function: hydrolase activity, acting on ester bonds (GO:0016788
AT5G61780	AT5G61780.1	985	HMMPfam	PF00567	TUDOR	728	853	4.29999999999998e-27	IPR008191	Maternal tudor protei
AT5G62350	AT5G62350.1	202	HMMPfam	PF04043	PMEI	35	194	9.50000000000005e-36	IPR006501	Pectinesterase inhibitor;Molecular Function: enzyme inhibitor activity (GO:0004857), Molecular Function: pectinesterase activity (GO:0030599
AT5G63800	AT5G63800.1	718	HMMPfam	PF01301	Glyco_hydro_35	38	344	2.79999999999994e-109	IPR001944	Glycoside hydrolase, family 35;Molecular Function: hydrolase activity, hydrolyzing O-glycosyl compounds (GO:0004553), Biological Process: carbohydrate metabolic process (GO:0005975
AT5G63810	AT5G63810.1	741	HMMPfam	PF01301	Glyco_hydro_35	38	343	10e-108	IPR001944	Glycoside hydrolase, family 35;Molecular Function: hydrolase activity, hydrolyzing O-glycosyl compounds (GO:0004553), Biological Process: carbohydrate metabolic process (GO:0005975
AT5G64260	AT5G64260.1	305	HMMPfam	PF04674	Phi_1	33	305	6.10000000000004e-121	IPR006766	Phosphate-induced protein
AT5G66680	AT5G66680.1	437	HMMPfam	PF03345	DDOST_48kD	24	437	5.40000000000002e-129	IPR005013	Dolichyl-diphosphooligosaccharide-protein glycosyltransferase 48kDa subunit;Molecular Function: dolichyl-diphosphooligosaccharide-protein glycotransferase activity (GO:0004579), Cellular Component: endoplasmic reticulum membrane (GO:0005789), Biological Process: protein amino acid N-linked glycosylation via asparagine (GO:0018279
AT5G67630	AT5G67630.1	469	HMMPfam	PF06068	TIP49	17	407	0	IPR010339	TIP49, C-terminal;Molecular Function: DNA helicase activity (GO:0003678), Molecular Function: ATP binding (GO:0005524
ATCG00020	ATCG00020.1	353	HMMPfam	PF00124	Photo_RC	28	329	1.5e-94	IPR000484	Photosynthetic reaction centre, L/M;Biological Process: photosynthetic electron transport in photosystem II (GO:0009772), Biological Process: photosynthesis, light reaction (GO:0019684), Cellular Component: plasma membrane light-harvesting complex (GO:0030077), Molecular Function: electron transporter, transferring electrons within the cyclic electron transport pathway of photosynthesis activity …
ATCG00120	ATCG00120.1	507	HMMPfam	PF00006	ATP-synt_ab	149	365	6.49999999999992e-73	IPR000194	ATPase, alpha/beta subunit, nucleotide-binding domain;Molecular Function: ATP binding (GO:0005524
ATCG00120	ATCG00120.1	507	HMMPfam	PF00306	ATP-synt_ab_C	377	459	5.09999999999998e-18	IPR000793	ATPase, F1/V1/A1 complex, alpha/beta subunit, C-terminal;Biological Process: ATP synthesis coupled proton transport (GO:0015986), Molecular Function: hydrolase activity, acting on acid anhydrides, catalyzing transmembrane movement of substances (GO:0016820), Cellular Component: proton-transporting two-sector ATPase complex, catalytic domain (GO:0033178
ATCG00120	ATCG00120.1	507	HMMPfam	PF02874	ATP-synt_ab_N	28	93	5.40000000000001e-15	IPR004100	ATPase, F1/V1/A1 complex, alpha/beta subunit, N-terminal;Biological Process: proton transport (GO:0015992), Cellular Component: proton-transporting two-sector ATPase complex (GO:0016469), Biological Process: ATP metabolic process (GO:0046034), Molecular Function: hydrogen ion transporting ATP synthase activity, rotational mechanism (GO:0046933), Molecular Function: proton-transporting ATPase acti…
ATCG00270	ATCG00270.1	353	HMMPfam	PF00124	Photo_RC	29	327	2.8e-79	IPR000484	Photosynthetic reaction centre, L/M;Biological Process: photosynthetic electron transport in photosystem II (GO:0009772), Biological Process: photosynthesis, light reaction (GO:0019684), Cellular Component: plasma membrane light-harvesting complex (GO:0030077), Molecular Function: electron transporter, transferring electrons within the cyclic electron transport pathway of photosynthesis activity …
ATCG00280	ATCG00280.1	473	HMMPfam	PF00421	PSII	31	471	1.5e-213	IPR000932	Photosystem antenna protein-like;Cellular Component: photosystem (GO:0009521), Biological Process: photosynthetic electron transport chain (GO:0009767), Cellular Component: membrane (GO:0016020), Molecular Function: chlorophyll binding (GO:0016168), Biological Process: photosynthesis, light reaction (GO:0019684
ATCG00340	ATCG00340.1	734	HMMPfam	PF00223	PsaA_PsaB	8	727	0	IPR001280	Photosystem I, PsaA/PsaB;Cellular Component: photosystem I (GO:0009522), Cellular Component: thylakoid (GO:0009579), Biological Process: photosynthesis (GO:0015979), Cellular Component: integral to membrane (GO:0016021
ATCG00480	ATCG00480.1	498	HMMPfam	PF00006	ATP-synt_ab	151	372	1.80000000000002e-61	IPR000194	ATPase, alpha/beta subunit, nucleotide-binding domain;Molecular Function: ATP binding (GO:0005524
ATCG00480	ATCG00480.1	498	HMMPfam	PF00306	ATP-synt_ab_C	385	497	1.9e-25	IPR000793	ATPase, F1/V1/A1 complex, alpha/beta subunit, C-terminal;Biological Process: ATP synthesis coupled proton transport (GO:0015986), Molecular Function: hydrolase activity, acting on acid anhydrides, catalyzing transmembrane movement of substances (GO:0016820), Cellular Component: proton-transporting two-sector ATPase complex, catalytic domain (GO:0033178
ATCG00480	ATCG00480.1	498	HMMPfam	PF02874	ATP-synt_ab_N	23	95	8.80000000000003e-21	IPR004100	ATPase, F1/V1/A1 complex, alpha/beta subunit, N-terminal;Biological Process: proton transport (GO:0015992), Cellular Component: proton-transporting two-sector ATPase complex (GO:0016469), Biological Process: ATP metabolic process (GO:0046034), Molecular Function: hydrogen ion transporting ATP synthase activity, rotational mechanism (GO:0046933), Molecular Function: proton-transporting ATPase acti…
ATCG00490	ATCG00490.1	479	HMMPfam	PF00016	RuBisCO_large	154	462	0	IPR000685	Ribulose bisphosphate carboxylase, large subunit, C-terminal;Molecular Function: magnesium ion binding (GO:0000287), Cellular Component: plastid (GO:0009536), Biological Process: carbon fixation (GO:0015977), Molecular Function: ribulose-bisphosphate carboxylase activity (GO:0016984
ATCG00490	ATCG00490.1	479	HMMPfam	PF02788	RuBisCO_large_N	21	146	7.29999999999998e-61	IPR017444	Ribulose bisphosphate carboxylase, large subunit, N-terminal;Molecular Function: magnesium ion binding (GO:0000287), Biological Process: carbon fixation (GO:0015977), Molecular Function: ribulose-bisphosphate carboxylase activity (GO:0016984
ATCG00500	ATCG00500.1	488	HMMPfam	PF01039	Carboxyl_trans	285	444	7.6e-19	IPR000022	Carboxyl transferase;Molecular Function: ligase activity (GO:0016874
ATCG00680	ATCG00680.1	508	HMMPfam	PF00421	PSII	1	500	0	IPR000932	Photosystem antenna protein-like;Cellular Component: photosystem (GO:0009521), Biological Process: photosynthetic electron transport chain (GO:0009767), Cellular Component: membrane (GO:0016020), Molecular Function: chlorophyll binding (GO:0016168), Biological Process: photosynthesis, light reaction (GO:0019684

## Sheet: 6xHis-Strep-Csy4
AGI	Protein name	Protein length	Application name	Domain id	Domain description	Start of domain match	End of domain match	E-value	INTERPRO id	INTERPRO domain name
AT1G01080	AT1G01080.1	293	HMMPfam	PF00076	RRM_1	110	180	2.7e-13	IPR000504	RNA recognition motif, RNP-1;Molecular Function: nucleic acid binding (GO:0003676
AT1G01080	AT1G01080.2	294	HMMPfam	PF00076	RRM_1	110	181	2.2e-12	IPR000504	RNA recognition motif, RNP-1;Molecular Function: nucleic acid binding (GO:0003676
AT1G01080	AT1G01080.1	293	HMMPfam	PF00076	RRM_1	214	282	1.3e-15	IPR000504	RNA recognition motif, RNP-1;Molecular Function: nucleic acid binding (GO:0003676
AT1G01080	AT1G01080.2	294	HMMPfam	PF00076	RRM_1	215	283	1.4e-15	IPR000504	RNA recognition motif, RNP-1;Molecular Function: nucleic acid binding (GO:0003676
AT1G02140	AT1G02140.1	150	HMMPfam	PF02792	Mago_nashi	8	150	6.20000000000009e-86	IPR004023	Mago nashi protein;Cellular Component: nucleus (GO:0005634
AT1G03630	AT1G03630.2	399	HMMPfam	PF00106	adh_short	88	230	4.29999999999998e-18	IPR002198	Short-chain dehydrogenase/reductase SDR;Biological Process: metabolic process (GO:0008152), Molecular Function: oxidoreductase activity (GO:0016491
AT1G03630	AT1G03630.1	401	HMMPfam	PF00106	adh_short	90	232	5.4e-21	IPR002198	Short-chain dehydrogenase/reductase SDR;Biological Process: metabolic process (GO:0008152), Molecular Function: oxidoreductase activity (GO:0016491
AT1G04170	AT1G04170.1	465	HMMPfam	PF00009	GTP_EFTU	32	237	1.80000000000002e-38	IPR000795	Protein synthesis factor, GTP-binding;Molecular Function: GTPase activity (GO:0003924), Molecular Function: GTP binding (GO:0005525
AT1G04170	AT1G04170.1	465	HMMPfam	PF03144	GTP_EFTU_D2	269	351	1.5e-07	IPR004161	Translation elongation factor EFTu/EF1A, domain 2;Molecular Function: GTP binding (GO:0005525
AT1G04170	AT1G04170.1	465	HMMPfam	PF09173	eIF2_C	361	452	2.89999999999999e-33	IPR015256	Initiation factor eIF2 gamma, C-termina
AT1G04510	AT1G04510.2;AT1G04510.1	523	HMMPfam	PF00400	WD40	255	291	4.1e-07;5.2e-10	IPR019781	WD40 repeat, subgrou
AT1G04510	AT1G04510.2;AT1G04510.1	523	HMMPfam	PF00400	WD40	302	337	0.076;9.6e-05	IPR019781	WD40 repeat, subgrou
AT1G04510	AT1G04510.2;AT1G04510.1	523	HMMPfam	PF00400	WD40	358	382	78;0.098	IPR019781	WD40 repeat, subgrou
AT1G04510	AT1G04510.2;AT1G04510.1	523	HMMPfam	PF00400	WD40	389	423	4e-04;5e-07	IPR019781	WD40 repeat, subgrou
AT1G04510	AT1G04510.2;AT1G04510.1	523	HMMPfam	PF00400	WD40	481	508	24;0.027	IPR019781	WD40 repeat, subgrou
AT1G04510	AT1G04510.2;AT1G04510.1	523	HMMPfam	PF08606	Prp19	66	132	4.40000000000001e-28;5.5e-31	IPR013915	Pre-mRNA-splicing factor 1
AT1G04980	AT1G04980.1	447	HMMPfam	PF00085	Thioredoxin	34	135	1.6e-30	IPR013766	Thioredoxin domain;Biological Process: cell redox homeostasis (GO:0045454
AT1G04980	AT1G04980.1	447	HMMPfam	PF00085	Thioredoxin	170	269	7.5e-30	IPR013766	Thioredoxin domain;Biological Process: cell redox homeostasis (GO:0045454
AT1G06220	AT1G06220.2;AT1G06220.1	987	HMMPfam	PF00009	GTP_EFTU	138	332	7.59999999999998e-43	IPR000795	Protein synthesis factor, GTP-binding;Molecular Function: GTPase activity (GO:0003924), Molecular Function: GTP binding (GO:0005525
AT1G06220	AT1G06220.2;AT1G06220.1	987	HMMPfam	PF00679	EFG_C	840	928	9.7e-19	IPR000640	Translation elongation factor EFG/EF2, C-terminal;Molecular Function: GTP binding (GO:0005525
AT1G06220	AT1G06220.2;AT1G06220.1	987	HMMPfam	PF03144	GTP_EFTU_D2	506	580	6.70000000000001e-08	IPR004161	Translation elongation factor EFTu/EF1A, domain 2;Molecular Function: GTP binding (GO:0005525
AT1G06220	AT1G06220.2;AT1G06220.1	987	HMMPfam	PF03764	EFG_IV	722	837	6.70000000000001e-22	IPR005517	Translation elongation factor EFG/EF2, domain IV;Molecular Function: GTP binding (GO:0005525
AT1G06230	AT1G06230.1;AT1G06230.2;AT1G06230.3	766	HMMPfam	PF00439	Bromodomain	425	508	1.2e-18	IPR001487	Bromodomai
AT1G06690	AT1G06690.1	377	HMMPfam	PF00248	Aldo_ket_red	60	363	6.29999999999998e-62	IPR001395	Aldo/keto reductase;Molecular Function: oxidoreductase activity (GO:0016491), Biological Process: oxidation reduction (GO:0055114
AT1G06960	AT1G06960.1;AT1G06960.2	229;228	HMMPfam	PF00076	RRM_1	12	82	0.0022	IPR000504	RNA recognition motif, RNP-1;Molecular Function: nucleic acid binding (GO:0003676
AT1G06960	AT1G06960.3	200	HMMPfam	PF00076	RRM_1	128	187	7.5e-09	IPR000504	RNA recognition motif, RNP-1;Molecular Function: nucleic acid binding (GO:0003676
AT1G06960	AT1G06960.2	228	HMMPfam	PF00076	RRM_1	156	215	9.7e-09	IPR000504	RNA recognition motif, RNP-1;Molecular Function: nucleic acid binding (GO:0003676
AT1G06960	AT1G06960.1	229	HMMPfam	PF00076	RRM_1	157	216	9.7e-09	IPR000504	RNA recognition motif, RNP-1;Molecular Function: nucleic acid binding (GO:0003676
AT1G08450	AT1G08450.2	370	HMMPfam	PF00262	Calreticulin	31	139	3e-29	IPR001580	Calreticulin/calnexin;Molecular Function: calcium ion binding (GO:0005509
AT1G08450	AT1G08450.3	399	HMMPfam	PF00262	Calreticulin	31	280	4.6e-85	IPR001580	Calreticulin/calnexin;Molecular Function: calcium ion binding (GO:0005509
AT1G08450	AT1G08450.1	424	HMMPfam	PF00262	Calreticulin	31	342	2.4e-108	IPR001580	Calreticulin/calnexin;Molecular Function: calcium ion binding (GO:0005509
AT1G08450	AT1G08450.2	370	HMMPfam	PF00262	Calreticulin	135	288	8.3e-49	IPR001580	Calreticulin/calnexin;Molecular Function: calcium ion binding (GO:0005509
AT1G08450	AT1G08450.3	399	HMMPfam	PF00262	Calreticulin	282	317	3.6e-05	IPR001580	Calreticulin/calnexin;Molecular Function: calcium ion binding (GO:0005509
AT1G09340	AT1G09340.1	378	HMMPfam	PF01370	Epimerase	56	273	1.6e-10	IPR001509	NAD-dependent epimerase/dehydratase;Molecular Function: catalytic activity (GO:0003824), Biological Process: cellular metabolic process (GO:0044237), Molecular Function: coenzyme binding (GO:0050662
AT1G09770	AT1G09770.1	844	HMMPfam	PF00249	Myb_DNA-binding	8	53	5.29999999999999e-09	IPR014778	Myb, DNA-bindin
AT1G09770	AT1G09770.1	844	HMMPfam	PF00249	Myb_DNA-binding	60	103	1.2e-05	IPR014778	Myb, DNA-bindin
AT1G09770	AT1G09770.1	844	HMMPfam	PF11831	DUF3351	262	360	1.6e-22	IPR021786	Protein of unknown function DUF335
AT1G09770	AT1G09770.1	844	HMMPfam	PF11831	DUF3351	349	729	6.10000000000004e-127	IPR021786	Protein of unknown function DUF335
AT1G10390	AT1G10390.1;AT1G10390.2	1041	HMMPfam	PF04096	Nucleoporin2	887	1027	1.80000000000002e-40	IPR007230	Peptidase S59, nucleoporin;Cellular Component: nuclear pore (GO:0005643), Biological Process: transport (GO:0006810
AT1G11580	AT1G11580.1	557	HMMPfam	PF01095	Pectinesterase	246	542	1.2e-148	IPR000070	Pectinesterase, catalytic;Cellular Component: cell wall (GO:0005618), Molecular Function: pectinesterase activity (GO:0030599), Biological Process: cell wall modification (GO:0042545
AT1G11580	AT1G11580.1	557	HMMPfam	PF04043	PMEI	56	203	2e-25	IPR006501	Pectinesterase inhibitor;Molecular Function: enzyme inhibitor activity (GO:0004857), Molecular Function: pectinesterase activity (GO:0030599
AT1G11860	AT1G11860.1;AT1G11860.2;AT1G11860.3	408	HMMPfam	PF01571	GCV_T	81	296	1.2e-61	IPR006222	Glycine cleavage T-protein, N-terminal;Molecular Function: aminomethyltransferase activity (GO:0004047), Cellular Component: cytoplasm (GO:0005737), Biological Process: glycine catabolic process (GO:0006546
AT1G11860	AT1G11860.1;AT1G11860.2;AT1G11860.3	408	HMMPfam	PF08669	GCV_T_C	305	397	7.20000000000003e-21	IPR013977	Glycine cleavage T-protein, C-terminal barre
AT1G12900	AT1G12900.3;AT1G12900.4	350	HMMPfam	PF00044	Gp_dh_N	16	167	5.49999999999995e-50	IPR020828	Glyceraldehyde 3-phosphate dehydrogenase, NAD(P) binding domai
AT1G12900	AT1G12900.1	399	HMMPfam	PF00044	Gp_dh_N	65	216	7.4e-50	IPR020828	Glyceraldehyde 3-phosphate dehydrogenase, NAD(P) binding domai
AT1G12900	AT1G12900.2	317	HMMPfam	PF00044	Gp_dh_N	69	134	4.4e-22	IPR020828	Glyceraldehyde 3-phosphate dehydrogenase, NAD(P) binding domai
AT1G12900	AT1G12900.2	317	HMMPfam	PF02800	Gp_dh_C	139	295	2.5e-69	IPR020829	Glyceraldehyde 3-phosphate dehydrogenase, catalytic domai
AT1G12900	AT1G12900.3;AT1G12900.4	350	HMMPfam	PF02800	Gp_dh_C	172	328	2.50000000000001e-66	IPR020829	Glyceraldehyde 3-phosphate dehydrogenase, catalytic domai
AT1G12900	AT1G12900.1	399	HMMPfam	PF02800	Gp_dh_C	221	377	3.39999999999996e-66	IPR020829	Glyceraldehyde 3-phosphate dehydrogenase, catalytic domai
AT1G12920	AT1G12920.1	434	HMMPfam	PF03463	eRF1_1	6	137	4e-28	IPR005140	eRF1 domain
AT1G12920	AT1G12920.1	434	HMMPfam	PF03464	eRF1_2	142	276	5.2e-42	IPR005141	eRF1 domain
AT1G12920	AT1G12920.1	434	HMMPfam	PF03465	eRF1_3	279	416	4.6e-38	IPR005142	eRF1 domain
AT1G14410	AT1G14410.1	263	HMMPfam	PF08536	Whirly	86	224	4.2e-64	IPR013742	Plant transcription facto
AT1G14650	AT1G14650.1;AT1G14650.2	785	HMMPfam	PF00240	ubiquitin	725	780	6.59999999999999e-06	IPR000626	Ubiquiti
AT1G14650	AT1G14650.1;AT1G14650.2	785	HMMPfam	PF01805	Surp	72	116	2.4e-16	IPR000061	SWAP/Surp;Molecular Function: RNA binding (GO:0003723), Biological Process: RNA processing (GO:0006396
AT1G14650	AT1G14650.1;AT1G14650.2	785	HMMPfam	PF01805	Surp	194	237	2.6e-15	IPR000061	SWAP/Surp;Molecular Function: RNA binding (GO:0003723), Biological Process: RNA processing (GO:0006396
AT1G14650	AT1G14650.1;AT1G14650.2	785	HMMPfam	PF12230	PRP21_like_P	249	470	3.79999999999991e-70	IPR022030	Pre-mRNA splicing factor PRP21 like protei
AT1G17220	AT1G17220.1	1026	HMMPfam	PF00009	GTP_EFTU	502	665	2.5e-39	IPR000795	Protein synthesis factor, GTP-binding;Molecular Function: GTPase activity (GO:0003924), Molecular Function: GTP binding (GO:0005525
AT1G17220	AT1G17220.1	1026	HMMPfam	PF03144	GTP_EFTU_D2	693	754	3.8e-10	IPR004161	Translation elongation factor EFTu/EF1A, domain 2;Molecular Function: GTP binding (GO:0005525
AT1G17220	AT1G17220.1	1026	HMMPfam	PF04760	IF2_N	420	470	3.5e-05	IPR006847	Translation initiation factor IF-2, N-terminal;Molecular Function: translation initiation factor activity (GO:0003743), Biological Process: translational initiation (GO:0006413
AT1G17220	AT1G17220.1	1026	HMMPfam	PF11987	IF-2	802	901	1.4e-32	NULL	NUL
AT1G20020	AT1G20020.2	350	HMMPfam	PF00175	NAD_binding_1	203	318	6.1e-25	IPR001433	Oxidoreductase FAD/NAD(P)-binding;Molecular Function: oxidoreductase activity (GO:0016491), Biological Process: oxidation reduction (GO:0055114
AT1G20020	AT1G20020.3;AT1G20020.1	369	HMMPfam	PF00175	NAD_binding_1	222	337	6.70000000000001e-25;8.5e-28	IPR001433	Oxidoreductase FAD/NAD(P)-binding;Molecular Function: oxidoreductase activity (GO:0016491), Biological Process: oxidation reduction (GO:0055114
AT1G20020	AT1G20020.3;AT1G20020.1	369	HMMPfam	PF00970	FAD_binding_6	143	208	0.095;0.00012	IPR008333	Oxidoreductase, FAD-binding domain;Molecular Function: oxidoreductase activity (GO:0016491), Biological Process: oxidation reduction (GO:0055114
AT1G20580	AT1G20580.1	131	HMMPfam	PF01423	LSM	11	74	1e-12	IPR001163	Like-Sm ribonucleoprotein (LSM) domai
AT1G20960	AT1G20960.1;AT1G20960.2	2171	HMMPfam	PF00270	DEAD	507	683	3.5e-23	IPR011545	DNA/RNA helicase, DEAD/DEAH box type, N-terminal;Molecular Function: nucleic acid binding (GO:0003676), Molecular Function: ATP binding (GO:0005524), Molecular Function: ATP-dependent helicase activity (GO:0008026
AT1G20960	AT1G20960.1;AT1G20960.2	2171	HMMPfam	PF00270	DEAD	1353	1520	3.60000000000001e-21	IPR011545	DNA/RNA helicase, DEAD/DEAH box type, N-terminal;Molecular Function: nucleic acid binding (GO:0003676), Molecular Function: ATP binding (GO:0005524), Molecular Function: ATP-dependent helicase activity (GO:0008026
AT1G20960	AT1G20960.1;AT1G20960.2	2171	HMMPfam	PF00271	Helicase_C	805	883	3.5e-06	IPR001650	DNA/RNA helicase, C-terminal;Molecular Function: nucleic acid binding (GO:0003676), Molecular Function: helicase activity (GO:0004386), Molecular Function: ATP binding (GO:0005524
AT1G20960	AT1G20960.1;AT1G20960.2	2171	HMMPfam	PF02889	Sec63	1006	1310	8.39999999999977e-103	IPR004179	Sec63 domai
AT1G20960	AT1G20960.1;AT1G20960.2	2171	HMMPfam	PF02889	Sec63	1839	2158	7.90000000000016e-98	IPR004179	Sec63 domai
AT1G24360	AT1G24360.1	319	HMMPfam	PF00106	adh_short	78	245	3.29999999999997e-40	IPR002198	Short-chain dehydrogenase/reductase SDR;Biological Process: metabolic process (GO:0008152), Molecular Function: oxidoreductase activity (GO:0016491
AT1G28290	AT1G28290.2	315	HMMPfam	PF01190	Pollen_Ole_e_I	188	272	1.1e-18	IPR006041	Pollen Ole e 1 allergen/extensi
AT1G28290	AT1G28290.1	359	HMMPfam	PF01190	Pollen_Ole_e_I	232	316	1.1e-15	IPR006041	Pollen Ole e 1 allergen/extensi
AT1G29250	AT1G29250.1	130	HMMPfam	PF01918	Alba	21	84	7.5e-08	IPR002775	Alba, DNA/RNA-binding protein;Molecular Function: nucleic acid binding (GO:0003676
AT1G32060	AT1G32060.1	395	HMMPfam	PF00485	PRK	52	250	3.19999999999996e-78	IPR006083	Phosphoribulokinase/uridine kinase;Molecular Function: ATP binding (GO:0005524), Biological Process: metabolic process (GO:0008152), Molecular Function: kinase activity (GO:0016301
AT1G32990	AT1G32990.1	222	HMMPfam	PF00298	Ribosomal_L11	140	208	1.6e-24	IPR020783	Ribosomal protein L11, C-terminal domain;Molecular Function: structural constituent of ribosome (GO:0003735), Cellular Component: ribosome (GO:0005840), Biological Process: translation (GO:0006412
AT1G32990	AT1G32990.1	222	HMMPfam	PF03946	Ribosomal_L11_N	77	135	1.3e-25	IPR020784	Ribosomal protein L11, N-terminal domai
AT1G33600	AT1G33600.1	478	HMMPfam	PF00560	LRR_1	223	245	110	IPR001611	Leucine-rich repeat;Molecular Function: protein binding (GO:0005515
AT1G33600	AT1G33600.1	478	HMMPfam	PF00560	LRR_1	249	268	160	IPR001611	Leucine-rich repeat;Molecular Function: protein binding (GO:0005515
AT1G33600	AT1G33600.1	478	HMMPfam	PF00560	LRR_1	274	293	550	IPR001611	Leucine-rich repeat;Molecular Function: protein binding (GO:0005515
AT1G33600	AT1G33600.1	478	HMMPfam	PF00560	LRR_1	297	313	640	IPR001611	Leucine-rich repeat;Molecular Function: protein binding (GO:0005515
AT1G33600	AT1G33600.1	478	HMMPfam	PF00560	LRR_1	437	457	10	IPR001611	Leucine-rich repeat;Molecular Function: protein binding (GO:0005515
AT1G33600	AT1G33600.1	478	HMMPfam	PF08263	LRRNT_2	30	68	9e-11	IPR013210	Leucine-rich repeat-containing N-terminal domain, type
AT1G33811	AT1G33811.1	370	HMMPfam	PF00657	Lipase_GDSL	35	350	2.70000000000002e-42	IPR001087	Lipase, GDSL;Biological Process: lipid metabolic process (GO:0006629), Molecular Function: hydrolase activity, acting on ester bonds (GO:0016788
AT1G41830	AT1G41830.1	542	HMMPfam	PF00394	Cu-oxidase	161	296	1.8e-41	IPR001117	Multicopper oxidase, type 1;Molecular Function: oxidoreductase activity (GO:0016491), Biological Process: oxidation reduction (GO:0055114
AT1G41830	AT1G41830.1	542	HMMPfam	PF07731	Cu-oxidase_2	398	513	1.1e-26	IPR011706	Multicopper oxidase, type 2;Molecular Function: copper ion binding (GO:0005507), Molecular Function: oxidoreductase activity (GO:0016491), Biological Process: oxidation reduction (GO:0055114
AT1G41830	AT1G41830.1	542	HMMPfam	PF07732	Cu-oxidase_3	35	148	2.4e-32	IPR011707	Multicopper oxidase, type 3;Molecular Function: copper ion binding (GO:0005507), Molecular Function: oxidoreductase activity (GO:0016491), Biological Process: oxidation reduction (GO:0055114
AT1G42970	AT1G42970.1	447	HMMPfam	PF00044	Gp_dh_N	83	235	1.6e-51	IPR020828	Glyceraldehyde 3-phosphate dehydrogenase, NAD(P) binding domai
AT1G42970	AT1G42970.1	447	HMMPfam	PF02672	CP12	427	447	3.5e-05	IPR003823	Protein of unknown function CP1
AT1G42970	AT1G42970.1	447	HMMPfam	PF02800	Gp_dh_C	240	397	3.8e-67	IPR020829	Glyceraldehyde 3-phosphate dehydrogenase, catalytic domai
AT1G44835	AT1G44835.1;AT1G44835.2	307;308	HMMPfam	PF04073	YbaK	24	149	8.80000000000003e-25	IPR007214	YbaK/aminoacyl-tRNA synthetase-associated domai
AT1G48410	AT1G48410.1	1048	HMMPfam	PF02170	PAZ	388	523	1.5e-34	IPR003100	Argonaute/Dicer protein, PA
AT1G48410	AT1G48410.2;AT1G48410.3	1050	HMMPfam	PF02170	PAZ	390	525	1.2e-31	IPR003100	Argonaute/Dicer protein, PA
AT1G48410	AT1G48410.1	1048	HMMPfam	PF02171	Piwi	677	996	3.5e-112	IPR003165	Stem cell self-renewal protein Piw
AT1G48410	AT1G48410.2;AT1G48410.3	1050	HMMPfam	PF02171	Piwi	679	998	2.79999999999994e-109	IPR003165	Stem cell self-renewal protein Piw
AT1G48410	AT1G48410.1	1048	HMMPfam	PF08699	DUF1785	334	386	9.5e-24	IPR014811	Domain of unknown function DUF178
AT1G48410	AT1G48410.2;AT1G48410.3	1050	HMMPfam	PF08699	DUF1785	336	388	7.5e-21	IPR014811	Domain of unknown function DUF178
AT1G48850	AT1G48850.3	380	HMMPfam	PF01264	Chorismate_synt	59	361	1.9e-116	IPR000453	Chorismate synthase;Molecular Function: chorismate synthase activity (GO:0004107), Biological Process: aromatic amino acid family biosynthetic process (GO:0009073
AT1G48850	AT1G48850.2	380	HMMPfam	PF01264	Chorismate_synt	59	362	1.10000000000001e-116	IPR000453	Chorismate synthase;Molecular Function: chorismate synthase activity (GO:0004107), Biological Process: aromatic amino acid family biosynthetic process (GO:0009073
AT1G48850	AT1G48850.1	436	HMMPfam	PF01264	Chorismate_synt	59	406	2.3e-138	IPR000453	Chorismate synthase;Molecular Function: chorismate synthase activity (GO:0004107), Biological Process: aromatic amino acid family biosynthetic process (GO:0009073
AT1G48920	AT1G48920.1	557	HMMPfam	PF00076	RRM_1	300	368	2.8e-11	IPR000504	RNA recognition motif, RNP-1;Molecular Function: nucleic acid binding (GO:0003676
AT1G48920	AT1G48920.1	557	HMMPfam	PF00076	RRM_1	403	470	6.70000000000001e-07	IPR000504	RNA recognition motif, RNP-1;Molecular Function: nucleic acid binding (GO:0003676
AT1G49670	AT1G49670.1;AT1G49670.2	629;652	HMMPfam	PF00106	adh_short	9	183	8.49999999999995e-21;1.2e-23	IPR002198	Short-chain dehydrogenase/reductase SDR;Biological Process: metabolic process (GO:0008152), Molecular Function: oxidoreductase activity (GO:0016491
AT1G49670	AT1G49670.1	629	HMMPfam	PF00107	ADH_zinc_N	439	573	1e-27	IPR013149	Alcohol dehydrogenase, C-terminal;Molecular Function: zinc ion binding (GO:0008270), Molecular Function: oxidoreductase activity (GO:0016491), Biological Process: oxidation reduction (GO:0055114
AT1G49670	AT1G49670.2	652	HMMPfam	PF00107	ADH_zinc_N	462	596	1.4e-30	IPR013149	Alcohol dehydrogenase, C-terminal;Molecular Function: zinc ion binding (GO:0008270), Molecular Function: oxidoreductase activity (GO:0016491), Biological Process: oxidation reduction (GO:0055114
AT1G49670	AT1G49670.1;AT1G49670.2	629;652	HMMPfam	PF08240	ADH_N	316	379	1e-06;1.4e-09	IPR013154	Alcohol dehydrogenase GroES-like;Molecular Function: oxidoreductase activity (GO:0016491
AT1G49750	AT1G49750.1	494	HMMPfam	PF00560	LRR_1	224	245	40	IPR001611	Leucine-rich repeat;Molecular Function: protein binding (GO:0005515
AT1G49750	AT1G49750.1	494	HMMPfam	PF00560	LRR_1	247	267	280	IPR001611	Leucine-rich repeat;Molecular Function: protein binding (GO:0005515
AT1G51510	AT1G51510.1	202	HMMPfam	PF00076	RRM_1	97	163	1.7e-15	IPR000504	RNA recognition motif, RNP-1;Molecular Function: nucleic acid binding (GO:0003676
AT1G54780	AT1G54780.1	285	HMMPfam	PF04536	DUF477	106	228	1.1e-06	IPR007621	Protein of unknown function DUF47
AT1G55210	AT1G55210.1;AT1G55210.2	187	HMMPfam	PF03018	Dirigent	43	186	1.40000000000001e-47	IPR004265	Plant disease resistance response protei
AT1G56070	AT1G56070.1	843	HMMPfam	PF00009	GTP_EFTU	17	341	7.20000000000003e-57	IPR000795	Protein synthesis factor, GTP-binding;Molecular Function: GTPase activity (GO:0003924), Molecular Function: GTP binding (GO:0005525
AT1G56070	AT1G56070.1	843	HMMPfam	PF00679	EFG_C	724	811	1.6e-17	IPR000640	Translation elongation factor EFG/EF2, C-terminal;Molecular Function: GTP binding (GO:0005525
AT1G56070	AT1G56070.1	843	HMMPfam	PF03144	GTP_EFTU_D2	393	468	1.4e-08	IPR004161	Translation elongation factor EFTu/EF1A, domain 2;Molecular Function: GTP binding (GO:0005525
AT1G56070	AT1G56070.1	843	HMMPfam	PF03764	EFG_IV	609	722	6.90000000000001e-34	IPR005517	Translation elongation factor EFG/EF2, domain IV;Molecular Function: GTP binding (GO:0005525
AT1G61620	AT1G61620.1	310	HMMPfam	PF04641	DUF602	186	289	5.9e-08	NULL	NUL
AT1G61730	AT1G61730.1	376	HMMPfam	PF04504	DUF573	155	245	2.1e-36	IPR007592	Protein of unknown function DUF57
AT1G65590	AT1G65590.1	535	HMMPfam	PF00728	Glyco_hydro_20	182	486	2.50000000000001e-88	IPR015883	Glycoside hydrolase, family 20, catalytic core;Molecular Function: hydrolase activity, hydrolyzing O-glycosyl compounds (GO:0004553
AT1G65590	AT1G65590.1	535	HMMPfam	PF02838	Glyco_hydro_20b	104	180	4.9e-08	IPR015882	Beta-N-acetylhexosaminidase, subunit a/b;Molecular Function: beta-N-acetylhexosaminidase activity (GO:0004563), Biological Process: carbohydrate metabolic process (GO:0005975
AT1G65870	AT1G65870.1	189	HMMPfam	PF03018	Dirigent	43	189	6.19999999999994e-54	IPR004265	Plant disease resistance response protei
AT1G68260	AT1G68260.1	190	HMMPfam	PF03061	4HBT	68	151	1.4e-10	IPR006683	Thioesterase superfamil
AT1G68560	AT1G68560.1	915	HMMPfam	PF01055	Glyco_hydro_31	264	755	0	IPR000322	Glycoside hydrolase, family 31;Molecular Function: hydrolase activity, hydrolyzing O-glycosyl compounds (GO:0004553), Biological Process: carbohydrate metabolic process (GO:0005975
AT1G69200	AT1G69200.1	616	HMMPfam	PF00294	PfkB	246	532	1.5e-28	IPR011611	Carbohydrate/purine kinas
AT1G72150	AT1G72150.1	573	HMMPfam	PF00650	CRAL_TRIO	320	462	7.20000000000002e-18	IPR001251	Cellular retinaldehyde-binding/triple function, C-termina
AT1G72150	AT1G72150.1	573	HMMPfam	PF03765	CRAL_TRIO_N	249	280	2.7e-05	IPR008273	Cellular retinaldehyde-binding/triple function, N-termina
AT1G77180	AT1G77180.1;AT1G77180.2;AT1G77180.3	613;511	HMMPfam	PF02731	SKIP_SNW	187	346	1.70000000000001e-63;1.5e-66	IPR004015	SKI-interacting protein SKIP, SNW domain;Biological Process: nuclear mRNA splicing, via spliceosome (GO:0000398), Molecular Function: protein binding (GO:0005515), Cellular Component: spliceosomal complex (GO:0005681
AT1G78060	AT1G78060.1	767	HMMPfam	PF00933	Glyco_hydro_3	71	325	1.40000000000001e-47	IPR001764	Glycoside hydrolase, family 3, N-terminal;Molecular Function: hydrolase activity, hydrolyzing O-glycosyl compounds (GO:0004553), Biological Process: carbohydrate metabolic process (GO:0005975
AT1G78060	AT1G78060.1	767	HMMPfam	PF01915	Glyco_hydro_3_C	398	626	1.29999999999998e-50	IPR002772	Glycoside hydrolase, family 3, C-terminal;Molecular Function: hydrolase activity, hydrolyzing O-glycosyl compounds (GO:0004553), Biological Process: carbohydrate metabolic process (GO:0005975
AT1G78820	AT1G78820.1	455	HMMPfam	PF01453	B_lectin	92	188	4.5e-21	IPR001480	Curculin-like (mannose-binding) lectin;Molecular Function: sugar binding (GO:0005529
AT1G78820	AT1G78820.1	455	HMMPfam	PF08276	PAN_2	402	434	0.02	IPR013227	PAN-2 domai
AT1G78830	AT1G78830.1	455	HMMPfam	PF01453	B_lectin	93	190	1.3e-21	IPR001480	Curculin-like (mannose-binding) lectin;Molecular Function: sugar binding (GO:0005529
AT1G78830	AT1G78830.1	455	HMMPfam	PF08276	PAN_2	402	434	0.018	IPR013227	PAN-2 domai
AT1G78850	AT1G78850.1	441	HMMPfam	PF01453	B_lectin	89	184	1.5e-24	IPR001480	Curculin-like (mannose-binding) lectin;Molecular Function: sugar binding (GO:0005529
AT1G80410	AT1G80410.1;AT1G80410.2	897;911	HMMPfam	PF00515	TPR_1	79	110	1e-04;1.3e-07	IPR001440	Tetratricopeptide TPR-
AT1G80410	AT1G80410.1;AT1G80410.2	897;911	HMMPfam	PF12569	NARP1	635	676	1.4e-15;1.8e-18	NULL	NUL
AT2G01140	AT2G01140.1	391	HMMPfam	PF00274	Glycolytic	47	391	0	IPR000741	Fructose-bisphosphate aldolase, class-I;Molecular Function: fructose-bisphosphate aldolase activity (GO:0004332), Biological Process: glycolysis (GO:0006096
AT2G01720	AT2G01720.1	464	HMMPfam	PF04597	Ribophorin_I	27	454	0	IPR007676	Ribophorin I;Molecular Function: dolichyl-diphosphooligosaccharide-protein glycotransferase activity (GO:0004579), Cellular Component: endoplasmic reticulum (GO:0005783), Biological Process: protein amino acid glycosylation (GO:0006486), Cellular Component: integral to membrane (GO:0016021
AT2G02740	AT2G02740.2	267	HMMPfam	PF08536	Whirly	90	228	1.09999999999999e-61	IPR013742	Plant transcription facto
AT2G02740	AT2G02740.1	268	HMMPfam	PF08536	Whirly	90	229	6.80000000000006e-61	IPR013742	Plant transcription facto
AT2G04842	AT2G04842.1	650	HMMPfam	PF00587	tRNA-synt_2b	286	448	3.3e-43	IPR002314	Aminoacyl-tRNA synthetase, class II (G/ H/ P/ S), conserved domain;Molecular Function: nucleotide binding (GO:0000166), Molecular Function: aminoacyl-tRNA ligase activity (GO:0004812), Molecular Function: ATP binding (GO:0005524), Cellular Component: cytoplasm (GO:0005737), Biological Process: translation (GO:0006412), Biological Process: tRNA aminoacylation for protein translation (GO:0006418
AT2G04842	AT2G04842.1	650	HMMPfam	PF03129	HGTP_anticodon	554	640	1e-19	IPR004154	Anticodon-binding;Molecular Function: aminoacyl-tRNA ligase activity (GO:0004812), Molecular Function: ATP binding (GO:0005524), Biological Process: translation (GO:0006412
AT2G04842	AT2G04842.1	650	HMMPfam	PF07973	tRNA_SAD	178	230	2e-13	IPR012947	Threonyl/alanyl tRNA synthetase, SAD;Molecular Function: ATP binding (GO:0005524), Cellular Component: cytoplasm (GO:0005737), Biological Process: translation (GO:0006412), Molecular Function: ligase activity, forming aminoacyl-tRNA and related compounds (GO:0016876), Biological Process: tRNA aminoacylation (GO:0043039
AT2G18510	AT2G18510.1	363	HMMPfam	PF00076	RRM_1	27	97	2.1e-14	IPR000504	RNA recognition motif, RNP-1;Molecular Function: nucleic acid binding (GO:0003676
AT2G18510	AT2G18510.1	363	HMMPfam	PF00076	RRM_1	114	184	2.6e-16	IPR000504	RNA recognition motif, RNP-1;Molecular Function: nucleic acid binding (GO:0003676
AT2G18740	AT2G18740.2	78	HMMPfam	PF01423	LSM	20	67	5.69999999999999e-09	IPR001163	Like-Sm ribonucleoprotein (LSM) domai
AT2G18740	AT2G18740.1	88	HMMPfam	PF01423	LSM	20	83	2.1e-14	IPR001163	Like-Sm ribonucleoprotein (LSM) domai
AT2G19520	AT2G19520.1	507	HMMPfam	PF00400	WD40	226	248	31	IPR019781	WD40 repeat, subgrou
AT2G19520	AT2G19520.1	507	HMMPfam	PF00400	WD40	286	321	0.0066	IPR019781	WD40 repeat, subgrou
AT2G19520	AT2G19520.1	507	HMMPfam	PF00400	WD40	331	366	0.00011	IPR019781	WD40 repeat, subgrou
AT2G19520	AT2G19520.1	507	HMMPfam	PF00400	WD40	377	415	2.6e-05	IPR019781	WD40 repeat, subgrou
AT2G19520	AT2G19520.1	507	HMMPfam	PF12265	CAF1C_H4-bd	65	134	7.90000000000001e-17	IPR022052	Histone-binding protein RBBP
AT2G20990	AT2G20990.2	565	HMMPfam	PF00168	C2	262	338	2e-22	IPR000008	C2 calcium-dependent membrane targetin
AT2G20990	AT2G20990.1	541	HMMPfam	PF00168	C2	262	343	2.5e-20	IPR000008	C2 calcium-dependent membrane targetin
AT2G20990	AT2G20990.3	579	HMMPfam	PF00168	C2	300	381	3.5e-23	IPR000008	C2 calcium-dependent membrane targetin
AT2G20990	AT2G20990.1	541	HMMPfam	PF00168	C2	422	487	1.5e-10	IPR000008	C2 calcium-dependent membrane targetin
AT2G20990	AT2G20990.2	565	HMMPfam	PF00168	C2	446	511	2e-13	IPR000008	C2 calcium-dependent membrane targetin
AT2G20990	AT2G20990.3	579	HMMPfam	PF00168	C2	460	525	2e-13	IPR000008	C2 calcium-dependent membrane targetin
AT2G21330	AT2G21330.2	311	HMMPfam	PF00274	Glycolytic	55	308	1.4e-121	IPR000741	Fructose-bisphosphate aldolase, class-I;Molecular Function: fructose-bisphosphate aldolase activity (GO:0004332), Biological Process: glycolysis (GO:0006096
AT2G21330	AT2G21330.3	389	HMMPfam	PF00274	Glycolytic	55	389	7.5e-153	IPR000741	Fructose-bisphosphate aldolase, class-I;Molecular Function: fructose-bisphosphate aldolase activity (GO:0004332), Biological Process: glycolysis (GO:0006096
AT2G21330	AT2G21330.1	399	HMMPfam	PF00274	Glycolytic	55	399	5.6e-166	IPR000741	Fructose-bisphosphate aldolase, class-I;Molecular Function: fructose-bisphosphate aldolase activity (GO:0004332), Biological Process: glycolysis (GO:0006096
AT2G21660	AT2G21660.2;AT2G21660.1	159;176	HMMPfam	PF00076	RRM_1	11	79	2.90000000000001e-20;4.6e-23	IPR000504	RNA recognition motif, RNP-1;Molecular Function: nucleic acid binding (GO:0003676
AT2G22230	AT2G22230.1	220	HMMPfam	PF07977	FabA	85	210	1.29999999999998e-34	IPR013114	Beta-hydroxyacyl-(acyl-carrier-protein) dehydratase, FabA/Fab
AT2G22360	AT2G22360.1	442	HMMPfam	PF00226	DnaJ	86	147	1.2e-24	IPR001623	Heat shock protein DnaJ, N-terminal;Molecular Function: heat shock protein binding (GO:0031072
AT2G22360	AT2G22360.1	442	HMMPfam	PF00684	DnaJ_CXXCXGXG	211	287	1.7e-15	IPR001305	Heat shock protein DnaJ, cysteine-rich domain;Biological Process: protein folding (GO:0006457), Molecular Function: heat shock protein binding (GO:0031072), Molecular Function: unfolded protein binding (GO:0051082
AT2G22360	AT2G22360.1	442	HMMPfam	PF01556	DnaJ_C	325	424	4.9e-26	IPR002939	Chaperone DnaJ, C-terminal;Biological Process: protein folding (GO:0006457), Molecular Function: unfolded protein binding (GO:0051082
AT2G24060	AT2G24060.1	312	HMMPfam	PF00707	IF3_C	167	252	4.10000000000001e-22	IPR019815	Translation initiation factor 3, C-terminal;Molecular Function: translation initiation factor activity (GO:0003743), Biological Process: translational initiation (GO:0006413
AT2G24060	AT2G24060.1	312	HMMPfam	PF05198	IF3_N	94	161	3.5e-24	IPR019814	Translation initiation factor 3, N-terminal;Molecular Function: translation initiation factor activity (GO:0003743), Biological Process: translational initiation (GO:0006413
AT2G24280	AT2G24280.1	494	HMMPfam	PF05577	Peptidase_S28	53	473	3.49999999999995e-92	IPR008758	Peptidase S28;Biological Process: proteolysis (GO:0006508), Molecular Function: serine-type peptidase activity (GO:0008236
AT2G25110	AT2G25110.1	218	HMMPfam	PF02815	MIR	54	195	4.6e-12	IPR003608	MIR;Cellular Component: membrane (GO:0016020
AT2G27100	AT2G27100.1	720	HMMPfam	PF04959	ARS2	443	554	0.02	IPR007042	Arsenite-resistance protein
AT2G27100	AT2G27100.1	720	HMMPfam	PF12066	DUF3546	197	280	2.1e-26	IPR021933	Protein of unknown function DUF354
AT2G28000	AT2G28000.1	586	HMMPfam	PF00118	Cpn60_TCP1	68	571	4.80000000000003e-115	IPR002423	Chaperonin Cpn60/TCP-1;Molecular Function: protein binding (GO:0005515), Molecular Function: ATP binding (GO:0005524), Biological Process: cellular protein metabolic process (GO:0044267
AT2G32920	AT2G32920.1	440	HMMPfam	PF00085	Thioredoxin	32	133	1.8e-28	IPR013766	Thioredoxin domain;Biological Process: cell redox homeostasis (GO:0045454
AT2G32920	AT2G32920.1	440	HMMPfam	PF00085	Thioredoxin	165	265	2.1e-25	IPR013766	Thioredoxin domain;Biological Process: cell redox homeostasis (GO:0045454
AT2G33150	AT2G33150.1	462	HMMPfam	PF00108	Thiolase_N	50	307	1.69999999999998e-80	IPR020616	Thiolase, N-terminal;Biological Process: metabolic process (GO:0008152), Molecular Function: transferase activity, transferring acyl groups other than amino-acyl groups (GO:0016747
AT2G33150	AT2G33150.1	462	HMMPfam	PF02803	Thiolase_C	315	438	8.30000000000004e-46	IPR020617	Thiolase, C-terminal;Biological Process: metabolic process (GO:0008152), Molecular Function: transferase activity, transferring acyl groups other than amino-acyl groups (GO:0016747
AT2G33340	AT2G33340.3;AT2G33340.1;AT2G33340.2	485;525	HMMPfam	PF00400	WD40	255	291	4.9e-08;6.9e-11	IPR019781	WD40 repeat, subgrou
AT2G33340	AT2G33340.3;AT2G33340.1;AT2G33340.2	485;525	HMMPfam	PF00400	WD40	301	337	0.001;1.4e-06	IPR019781	WD40 repeat, subgrou
AT2G33340	AT2G33340.3;AT2G33340.1;AT2G33340.2	485;525	HMMPfam	PF00400	WD40	357	381	140;0.19	IPR019781	WD40 repeat, subgrou
AT2G33340	AT2G33340.3;AT2G33340.1;AT2G33340.2	485;525	HMMPfam	PF00400	WD40	388	422	9.20000000000001e-05;1.3e-07	IPR019781	WD40 repeat, subgrou
AT2G33340	AT2G33340.1;AT2G33340.2	525	HMMPfam	PF00400	WD40	480	507	0.0033	IPR019781	WD40 repeat, subgrou
AT2G33340	AT2G33340.3;AT2G33340.1;AT2G33340.2	485;525	HMMPfam	PF08606	Prp19	66	132	2.7e-28;3.9e-31	IPR013915	Pre-mRNA-splicing factor 1
AT2G33530	AT2G33530.1	465	HMMPfam	PF00450	Peptidase_S10	39	457	1.5e-120	IPR001563	Peptidase S10, serine carboxypeptidase;Molecular Function: serine-type carboxypeptidase activity (GO:0004185), Biological Process: proteolysis (GO:0006508
AT2G33730	AT2G33730.1	733	HMMPfam	PF00270	DEAD	338	528	8.00000000000001e-48	IPR011545	DNA/RNA helicase, DEAD/DEAH box type, N-terminal;Molecular Function: nucleic acid binding (GO:0003676), Molecular Function: ATP binding (GO:0005524), Molecular Function: ATP-dependent helicase activity (GO:0008026
AT2G33730	AT2G33730.1	733	HMMPfam	PF00271	Helicase_C	595	671	9.7e-26	IPR001650	DNA/RNA helicase, C-terminal;Molecular Function: nucleic acid binding (GO:0003676), Molecular Function: helicase activity (GO:0004386), Molecular Function: ATP binding (GO:0005524
AT2G33800	AT2G33800.1	303	HMMPfam	PF00333	Ribosomal_S5	147	211	7.79999999999999e-22	IPR013810	Ribosomal protein S5, N-terminal;Molecular Function: RNA binding (GO:0003723), Molecular Function: structural constituent of ribosome (GO:0003735), Cellular Component: intracellular (GO:0005622), Cellular Component: ribosome (GO:0005840), Biological Process: translation (GO:0006412
AT2G33800	AT2G33800.1	303	HMMPfam	PF03719	Ribosomal_S5_C	223	295	1.4e-24	IPR005324	Ribosomal protein S5, C-terminal;Molecular Function: structural constituent of ribosome (GO:0003735), Cellular Component: intracellular (GO:0005622), Cellular Component: ribosome (GO:0005840), Biological Process: translation (GO:0006412
AT2G34040	AT2G34040.2	442	HMMPfam	PF05918	API5	11	430	0	IPR008383	Apoptosis inhibitory
AT2G34040	AT2G34040.1	553	HMMPfam	PF05918	API5	11	553	0	IPR008383	Apoptosis inhibitory
AT2G34420	AT2G34420.1	265	HMMPfam	PF00504	Chloroa_b-bind	64	231	6.00000000000001e-47	NULL	NUL
AT2G36460	AT2G36460.2	267	HMMPfam	PF00274	Glycolytic	1	267	1.79999999999997e-128	IPR000741	Fructose-bisphosphate aldolase, class-I;Molecular Function: fructose-bisphosphate aldolase activity (GO:0004332), Biological Process: glycolysis (GO:0006096
AT2G36460	AT2G36460.1	358	HMMPfam	PF00274	Glycolytic	11	358	0	IPR000741	Fructose-bisphosphate aldolase, class-I;Molecular Function: fructose-bisphosphate aldolase activity (GO:0004332), Biological Process: glycolysis (GO:0006096
AT2G37220	AT2G37220.1	289	HMMPfam	PF00076	RRM_1	93	163	1.5e-20	IPR000504	RNA recognition motif, RNP-1;Molecular Function: nucleic acid binding (GO:0003676
AT2G37220	AT2G37220.1	289	HMMPfam	PF00076	RRM_1	206	276	1.1e-21	IPR000504	RNA recognition motif, RNP-1;Molecular Function: nucleic acid binding (GO:0003676
AT2G38040	AT2G38040.1;AT2G38040.2	769	HMMPfam	PF03255	ACCA	97	240	1.29999999999998e-60	IPR020582	Acetyl-CoA carboxylase, alpha subunit, conserved regio
AT2G39730	AT2G39730.2;AT2G39730.3;AT2G39730.1	446;441;474	HMMPfam	PF00004	AAA	163	304	6.40000000000001e-13;6.3e-13;9.2e-16	IPR003959	ATPase, AAA-type, core;Molecular Function: ATP binding (GO:0005524
AT2G39800	AT2G39800.2	614	HMMPfam	PF00171	Aldedh	188	455	3.8e-05	IPR015590	Aldehyde dehydrogenase;Biological Process: metabolic process (GO:0008152), Molecular Function: oxidoreductase activity (GO:0016491), Biological Process: oxidation reduction (GO:0055114
AT2G39800	AT2G39800.3	714	HMMPfam	PF00171	Aldedh	291	555	2e-06	IPR015590	Aldehyde dehydrogenase;Biological Process: metabolic process (GO:0008152), Molecular Function: oxidoreductase activity (GO:0016491), Biological Process: oxidation reduction (GO:0055114
AT2G39800	AT2G39800.1;AT2G39800.4	717	HMMPfam	PF00171	Aldedh	291	558	6.8e-08	IPR015590	Aldehyde dehydrogenase;Biological Process: metabolic process (GO:0008152), Molecular Function: oxidoreductase activity (GO:0016491), Biological Process: oxidation reduction (GO:0055114
AT2G39800	AT2G39800.2	614	HMMPfam	PF00696	AA_kinase	1	157	2.6e-20	IPR001048	Aspartate/glutamate/uridylate kinase;Biological Process: cellular amino acid biosynthetic process (GO:0008652
AT2G39800	AT2G39800.3;AT2G39800.1;AT2G39800.4	714;717	HMMPfam	PF00696	AA_kinase	15	260	3.8e-37;3.9e-37	IPR001048	Aspartate/glutamate/uridylate kinase;Biological Process: cellular amino acid biosynthetic process (GO:0008652
AT2G40290	AT2G40290.1;AT2G40290.2;AT2G40290.3	344;241	HMMPfam	PF00575	S1	19	92	8.1e-10;4.3e-10	IPR003029	Ribosomal protein S1, RNA-binding domain;Molecular Function: RNA binding (GO:0003723
AT2G40290	AT2G40290.2;AT2G40290.3	241	HMMPfam	PF07541	EIF_2_alpha	129	226	5.40000000000002e-27	IPR011488	Eukaryotic translation initiation factor 2, alpha subunit;Molecular Function: RNA binding (GO:0003723), Molecular Function: translation initiation factor activity (GO:0003743), Cellular Component: eukaryotic translation initiation factor 2 complex (GO:0005850), Biological Process: translation (GO:0006412
AT2G40290	AT2G40290.1	344	HMMPfam	PF07541	EIF_2_alpha	129	260	4.5e-45	IPR011488	Eukaryotic translation initiation factor 2, alpha subunit;Molecular Function: RNA binding (GO:0003723), Molecular Function: translation initiation factor activity (GO:0003743), Cellular Component: eukaryotic translation initiation factor 2 complex (GO:0005850), Biological Process: translation (GO:0006412
AT2G42520	AT2G42520.1	633	HMMPfam	PF00270	DEAD	183	363	2.19999999999997e-48	IPR011545	DNA/RNA helicase, DEAD/DEAH box type, N-terminal;Molecular Function: nucleic acid binding (GO:0003676), Molecular Function: ATP binding (GO:0005524), Molecular Function: ATP-dependent helicase activity (GO:0008026
AT2G42520	AT2G42520.1	633	HMMPfam	PF00271	Helicase_C	440	513	5.5e-24	IPR001650	DNA/RNA helicase, C-terminal;Molecular Function: nucleic acid binding (GO:0003676), Molecular Function: helicase activity (GO:0004386), Molecular Function: ATP binding (GO:0005524
AT2G42910	AT2G42910.1	337	HMMPfam	PF00156	Pribosyltran	172	277	0.00015	IPR000836	Phosphoribosyltransferase;Biological Process: nucleoside metabolic process (GO:0009116
AT2G45180	AT2G45180.1	134	HMMPfam	PF00234	Tryp_alpha_amyl	52	133	4.80000000000001e-05	IPR003612	Plant lipid transfer protein/seed storage/trypsin-alpha amylase inhibito
AT2G45220	AT2G45220.1	511	HMMPfam	PF01095	Pectinesterase	206	497	0	IPR000070	Pectinesterase, catalytic;Cellular Component: cell wall (GO:0005618), Molecular Function: pectinesterase activity (GO:0030599), Biological Process: cell wall modification (GO:0042545
AT2G45220	AT2G45220.1	511	HMMPfam	PF04043	PMEI	27	171	1.3e-20	IPR006501	Pectinesterase inhibitor;Molecular Function: enzyme inhibitor activity (GO:0004857), Molecular Function: pectinesterase activity (GO:0030599
AT2G45640	AT2G45640.2	149	HMMPfam	PF06487	SAP18	30	148	5.7e-38	IPR010516	Sin3 associated polypeptide p1
AT2G45640	AT2G45640.1	152	HMMPfam	PF06487	SAP18	30	151	1.2e-38	IPR010516	Sin3 associated polypeptide p1
AT2G45960	AT2G45960.2	274	HMMPfam	PF00230	MIP	44	255	3.60000000000002e-71	IPR000425	Major intrinsic protein;Molecular Function: transporter activity (GO:0005215), Biological Process: transport (GO:0006810), Cellular Component: membrane (GO:0016020
AT2G45960	AT2G45960.3	301	HMMPfam	PF00230	MIP	44	261	1.99999999999999e-71	IPR000425	Major intrinsic protein;Molecular Function: transporter activity (GO:0005215), Biological Process: transport (GO:0006810), Cellular Component: membrane (GO:0016020
AT2G45960	AT2G45960.1	286	HMMPfam	PF00230	MIP	44	273	1.5e-85	IPR000425	Major intrinsic protein;Molecular Function: transporter activity (GO:0005215), Biological Process: transport (GO:0006810), Cellular Component: membrane (GO:0016020
AT2G47470	AT2G47470.2;AT2G47470.3;AT2G47470.4;AT2G47470.1	266;323;335;361	HMMPfam	PF00085	Thioredoxin	25	128	5.09999999999998e-32;7.79999999999999e-32;8.40000000000001e-32;1.2e-34	IPR013766	Thioredoxin domain;Biological Process: cell redox homeostasis (GO:0045454
AT2G47470	AT2G47470.2;AT2G47470.3;AT2G47470.4;AT2G47470.1	266;323;335;361	HMMPfam	PF00085	Thioredoxin	143	247	2.7e-31;4.10000000000001e-31;4.40000000000001e-31;6.5e-34	IPR013766	Thioredoxin domain;Biological Process: cell redox homeostasis (GO:0045454
AT2G47470	AT2G47470.3	323	HMMPfam	PF07749	ERp29	264	306	0.014	IPR011679	Endoplasmic reticulum, protein ERp29, C-terminal;Cellular Component: endoplasmic reticulum (GO:0005783
AT2G47470	AT2G47470.1	361	HMMPfam	PF07749	ERp29	264	358	6.8e-28	IPR011679	Endoplasmic reticulum, protein ERp29, C-terminal;Cellular Component: endoplasmic reticulum (GO:0005783
AT2G47470	AT2G47470.4	335	HMMPfam	PF07749	ERp29	291	332	3.1e-08	IPR011679	Endoplasmic reticulum, protein ERp29, C-terminal;Cellular Component: endoplasmic reticulum (GO:0005783
AT2G47580	AT2G47580.1	250	HMMPfam	PF00076	RRM_1	20	90	1.1e-07	IPR000504	RNA recognition motif, RNP-1;Molecular Function: nucleic acid binding (GO:0003676
AT2G47580	AT2G47580.1	250	HMMPfam	PF00076	RRM_1	179	242	9.8e-10	IPR000504	RNA recognition motif, RNP-1;Molecular Function: nucleic acid binding (GO:0003676
AT3G01500	AT3G01500.1	270	HMMPfam	PF00484	Pro_CA	85	243	1.29999999999998e-39	IPR001765	Carbonic anhydrase;Molecular Function: carbonate dehydratase activity (GO:0004089), Molecular Function: zinc ion binding (GO:0008270), Biological Process: carbon utilization (GO:0015976
AT3G01500	AT3G01500.3;AT3G01500.2	336;347	HMMPfam	PF00484	Pro_CA	162	320	2.29999999999998e-39;3.1e-42	IPR001765	Carbonic anhydrase;Molecular Function: carbonate dehydratase activity (GO:0004089), Molecular Function: zinc ion binding (GO:0008270), Biological Process: carbon utilization (GO:0015976
AT3G02760	AT3G02760.1	883	HMMPfam	PF00587	tRNA-synt_2b	464	613	5.4e-16	IPR002314	Aminoacyl-tRNA synthetase, class II (G/ H/ P/ S), conserved domain;Molecular Function: nucleotide binding (GO:0000166), Molecular Function: aminoacyl-tRNA ligase activity (GO:0004812), Molecular Function: ATP binding (GO:0005524), Cellular Component: cytoplasm (GO:0005737), Biological Process: translation (GO:0006412), Biological Process: tRNA aminoacylation for protein translation (GO:0006418
AT3G02760	AT3G02760.1	883	HMMPfam	PF03129	HGTP_anticodon	789	881	3.9e-11	IPR004154	Anticodon-binding;Molecular Function: aminoacyl-tRNA ligase activity (GO:0004812), Molecular Function: ATP binding (GO:0005524), Biological Process: translation (GO:0006412
AT3G04600	AT3G04600.1;AT3G04600.2;AT3G04600.3	402	HMMPfam	PF00579	tRNA-synt_1b	87	373	6.00000000000001e-22;9.40000000000003e-21	IPR002305	Aminoacyl-tRNA synthetase, class Ib;Molecular Function: nucleotide binding (GO:0000166), Molecular Function: aminoacyl-tRNA ligase activity (GO:0004812), Molecular Function: ATP binding (GO:0005524), Cellular Component: cytoplasm (GO:0005737), Biological Process: translation (GO:0006412), Biological Process: tRNA aminoacylation for protein translation (GO:0006418
AT3G05060	AT3G05060.1	533	HMMPfam	PF01798	Nop	252	399	4.70000000000003e-59	IPR002687	Pre-mRNA processing ribonucleoprotein, snoRNA-binding domai
AT3G05060	AT3G05060.1	533	HMMPfam	PF08060	NOSIC	160	212	5.09999999999998e-26	IPR012976	NOSI
AT3G05060	AT3G05060.1	533	HMMPfam	PF08156	NOP5NT	3	67	1.2e-20	IPR012974	NOP5, N-termina
AT3G09260	AT3G09260.1	524	HMMPfam	PF00232	Glyco_hydro_1	37	511	0	IPR001360	Glycoside hydrolase, family 1;Molecular Function: hydrolase activity, hydrolyzing O-glycosyl compounds (GO:0004553), Biological Process: carbohydrate metabolic process (GO:0005975
AT3G11710	AT3G11710.1	626	HMMPfam	PF00152	tRNA-synt_2	259	608	2.30000000000004e-85	IPR004364	Aminoacyl-tRNA synthetase, class II (D/K/N);Molecular Function: nucleotide binding (GO:0000166), Molecular Function: aminoacyl-tRNA ligase activity (GO:0004812), Molecular Function: ATP binding (GO:0005524), Cellular Component: cytoplasm (GO:0005737), Biological Process: translation (GO:0006412), Biological Process: tRNA aminoacylation for protein translation (GO:0006418
AT3G11710	AT3G11710.1	626	HMMPfam	PF01336	tRNA_anti	141	217	4.40000000000001e-07	IPR004365	Nucleic acid binding, OB-fold, tRNA/helicase-type;Molecular Function: nucleic acid binding (GO:0003676
AT3G12140	AT3G12140.1;AT3G12140.2;AT3G12140.3	327;383	HMMPfam	PF03735	ENT	1	73	5.20000000000001e-30;6.79999999999998e-30	IPR005491	EN
AT3G12290	AT3G12290.1	299	HMMPfam	PF00763	THF_DHG_CYH	10	127	2.29999999999998e-39	IPR020630	Tetrahydrofolate dehydrogenase/cyclohydrolase, catalytic domain;Molecular Function: catalytic activity (GO:0003824), Biological Process: folic acid and derivative biosynthetic process (GO:0009396
AT3G12290	AT3G12290.1	299	HMMPfam	PF02882	THF_DHG_CYH_C	130	295	9.69999999999989e-66	IPR020631	Tetrahydrofolate dehydrogenase/cyclohydrolase, NAD(P)-binding domain;Molecular Function: catalytic activity (GO:0003824), Biological Process: folic acid and derivative biosynthetic process (GO:0009396
AT3G12700	AT3G12700.2	263	HMMPfam	PF00026	Asp	105	159	7.3e-10	IPR001461	Peptidase A1;Molecular Function: aspartic-type endopeptidase activity (GO:0004190), Biological Process: proteolysis (GO:0006508
AT3G12700	AT3G12700.1	461	HMMPfam	PF00026	Asp	105	457	4.5e-20	IPR001461	Peptidase A1;Molecular Function: aspartic-type endopeptidase activity (GO:0004190), Biological Process: proteolysis (GO:0006508
AT3G12800	AT3G12800.1	298	HMMPfam	PF00106	adh_short	14	186	6.1e-25	IPR002198	Short-chain dehydrogenase/reductase SDR;Biological Process: metabolic process (GO:0008152), Molecular Function: oxidoreductase activity (GO:0016491
AT3G13224	AT3G13224.1;AT3G13224.2	231;358	HMMPfam	PF00076	RRM_1	21	88	1.4e-13;3.1e-13	IPR000504	RNA recognition motif, RNP-1;Molecular Function: nucleic acid binding (GO:0003676
AT3G13224	AT3G13224.1;AT3G13224.2	231;358	HMMPfam	PF00076	RRM_1	111	169	1.3e-15;2.4e-15	IPR000504	RNA recognition motif, RNP-1;Molecular Function: nucleic acid binding (GO:0003676
AT3G13470	AT3G13470.1	596	HMMPfam	PF00118	Cpn60_TCP1	74	576	3.49999999999995e-115	IPR002423	Chaperonin Cpn60/TCP-1;Molecular Function: protein binding (GO:0005515), Molecular Function: ATP binding (GO:0005524), Biological Process: cellular protein metabolic process (GO:0044267
AT3G13750	AT3G13750.1	847	HMMPfam	PF01301	Glyco_hydro_35	41	345	1.29999999999998e-115	IPR001944	Glycoside hydrolase, family 35;Molecular Function: hydrolase activity, hydrolyzing O-glycosyl compounds (GO:0004553), Biological Process: carbohydrate metabolic process (GO:0005975
AT3G13750	AT3G13750.1	847	HMMPfam	PF02140	Gal_Lectin	769	846	1.5e-18	IPR000922	D-galactoside/L-rhamnose binding SUEL lectin;Molecular Function: sugar binding (GO:0005529
AT3G13790	AT3G13790.2	581	HMMPfam	PF00251	Glyco_hydro_32N	56	375	3.4e-112	IPR013148	Glycosyl hydrolases family 32, N-termina
AT3G13790	AT3G13790.1	584	HMMPfam	PF00251	Glyco_hydro_32N	56	378	2.59999999999995e-115	IPR013148	Glycosyl hydrolases family 32, N-termina
AT3G13790	AT3G13790.2	581	HMMPfam	PF08244	Glyco_hydro_32C	447	535	6.3e-22	IPR013189	Glycosyl hydrolase family 32, C-termina
AT3G13790	AT3G13790.1	584	HMMPfam	PF08244	Glyco_hydro_32C	450	538	5.09999999999998e-19	IPR013189	Glycosyl hydrolase family 32, C-termina
AT3G14310	AT3G14310.1	592	HMMPfam	PF01095	Pectinesterase	281	577	0	IPR000070	Pectinesterase, catalytic;Cellular Component: cell wall (GO:0005618), Molecular Function: pectinesterase activity (GO:0030599), Biological Process: cell wall modification (GO:0042545
AT3G14310	AT3G14310.1	592	HMMPfam	PF04043	PMEI	54	212	1.1e-29	IPR006501	Pectinesterase inhibitor;Molecular Function: enzyme inhibitor activity (GO:0004857), Molecular Function: pectinesterase activity (GO:0030599
AT3G15190	AT3G15190.1	202	HMMPfam	PF01649	Ribosomal_S20p	87	174	1.5e-15	IPR002583	Ribosomal protein S20;Molecular Function: RNA binding (GO:0003723), Molecular Function: structural constituent of ribosome (GO:0003735), Cellular Component: intracellular (GO:0005622), Cellular Component: ribosome (GO:0005840), Biological Process: translation (GO:0006412
AT3G15356	AT3G15356.1	271	HMMPfam	PF00139	Lectin_legB	20	270	6.90000000000007e-68	IPR001220	Legume lectin, beta chain;Molecular Function: binding (GO:0005488
AT3G18790	AT3G18790.1	300	HMMPfam	PF06246	Isy1	1	280	5.99999999999995e-88	IPR009360	Isy1-like splicin
AT3G18890	AT3G18890.1	641	HMMPfam	PF05368	NmrA	84	211	2.4e-08	IPR008030	NmrA-lik
AT3G19760	AT3G19760.1	408	HMMPfam	PF00270	DEAD	60	222	1.29999999999998e-40	IPR011545	DNA/RNA helicase, DEAD/DEAH box type, N-terminal;Molecular Function: nucleic acid binding (GO:0003676), Molecular Function: ATP binding (GO:0005524), Molecular Function: ATP-dependent helicase activity (GO:0008026
AT3G19760	AT3G19760.1	408	HMMPfam	PF00271	Helicase_C	293	369	4.00000000000001e-25	IPR001650	DNA/RNA helicase, C-terminal;Molecular Function: nucleic acid binding (GO:0003676), Molecular Function: helicase activity (GO:0004386), Molecular Function: ATP binding (GO:0005524
AT3G19820	AT3G19820.1;AT3G19820.3;AT3G19820.2	561	HMMPfam	PF01565	FAD_binding_4	110	199	9.9e-16	IPR006094	FAD linked oxidase, N-terminal;Molecular Function: oxidoreductase activity (GO:0016491), Molecular Function: FAD binding (GO:0050660
AT3G26060	AT3G26060.1	216	HMMPfam	PF00578	AhpC-TSA	72	193	1.70000000000001e-40	IPR000866	Alkyl hydroperoxide reductase/ Thiol specific antioxidant/ Mal allergen;Molecular Function: antioxidant activity (GO:0016209), Molecular Function: oxidoreductase activity (GO:0016491
AT3G26060	AT3G26060.2	217	HMMPfam	PF00578	AhpC-TSA	73	194	2.2e-43	IPR000866	Alkyl hydroperoxide reductase/ Thiol specific antioxidant/ Mal allergen;Molecular Function: antioxidant activity (GO:0016209), Molecular Function: oxidoreductase activity (GO:0016491
AT3G26420	AT3G26420.1	245	HMMPfam	PF00076	RRM_1	10	79	5.90000000000001e-18	IPR000504	RNA recognition motif, RNP-1;Molecular Function: nucleic acid binding (GO:0003676
AT3G26420	AT3G26420.1	245	HMMPfam	PF00098	zf-CCHC	120	135	1.6e-05	IPR001878	Zinc finger, CCHC-type;Molecular Function: nucleic acid binding (GO:0003676), Molecular Function: zinc ion binding (GO:0008270
AT3G26560	AT3G26560.1	1168	HMMPfam	PF00270	DEAD	521	671	1.4e-05	IPR011545	DNA/RNA helicase, DEAD/DEAH box type, N-terminal;Molecular Function: nucleic acid binding (GO:0003676), Molecular Function: ATP binding (GO:0005524), Molecular Function: ATP-dependent helicase activity (GO:0008026
AT3G26560	AT3G26560.1	1168	HMMPfam	PF00271	Helicase_C	759	845	3.9e-08	IPR001650	DNA/RNA helicase, C-terminal;Molecular Function: nucleic acid binding (GO:0003676), Molecular Function: helicase activity (GO:0004386), Molecular Function: ATP binding (GO:0005524
AT3G26560	AT3G26560.1	1168	HMMPfam	PF00575	S1	215	281	2.2e-08	IPR003029	Ribosomal protein S1, RNA-binding domain;Molecular Function: RNA binding (GO:0003723
AT3G26560	AT3G26560.1	1168	HMMPfam	PF04408	HA2	907	996	6.19999999999999e-25	IPR007502	Helicase-associated domain;Molecular Function: helicase activity (GO:0004386
AT3G26560	AT3G26560.1	1168	HMMPfam	PF07717	DUF1605	1030	1129	1.3e-22	IPR011709	Domain of unknown function DUF160
AT3G26650	AT3G26650.1	396	HMMPfam	PF00044	Gp_dh_N	63	213	1.9e-49	IPR020828	Glyceraldehyde 3-phosphate dehydrogenase, NAD(P) binding domai
AT3G26650	AT3G26650.1	396	HMMPfam	PF02800	Gp_dh_C	218	374	3.60000000000002e-65	IPR020829	Glyceraldehyde 3-phosphate dehydrogenase, catalytic domai
AT3G27925	AT3G27925.1	439	HMMPfam	PF00089	Trypsin	158	317	2.4e-13	IPR001254	Peptidase S1/S6, chymotrypsin/Hap;Molecular Function: serine-type endopeptidase activity (GO:0004252), Biological Process: proteolysis (GO:0006508
AT3G28730	AT3G28730.1	646	HMMPfam	PF00505	HMG_box	562	630	2.90000000000001e-20	IPR000910	High mobility group, HMG1/HMG2;Molecular Function: DNA binding (GO:0003677), Cellular Component: nucleus (GO:0005634
AT3G28730	AT3G28730.1	646	HMMPfam	PF03531	SSrecog	219	434	3.70000000000004e-100	IPR000969	Structure-specific recognition protein;Molecular Function: DNA binding (GO:0003677), Cellular Component: nucleus (GO:0005634
AT3G44110	AT3G44110.2;AT3G44110.1	343;420	HMMPfam	PF00226	DnaJ	15	72	1.3e-21;2.2e-24	IPR001623	Heat shock protein DnaJ, N-terminal;Molecular Function: heat shock protein binding (GO:0031072
AT3G44110	AT3G44110.2;AT3G44110.1	343;420	HMMPfam	PF00684	DnaJ_CXXCXGXG	135	214	5.10000000000001e-15;9.1e-18	IPR001305	Heat shock protein DnaJ, cysteine-rich domain;Biological Process: protein folding (GO:0006457), Molecular Function: heat shock protein binding (GO:0031072), Molecular Function: unfolded protein binding (GO:0051082
AT3G44110	AT3G44110.2	343	HMMPfam	PF01556	DnaJ_C	251	328	1.1e-16	IPR002939	Chaperone DnaJ, C-terminal;Biological Process: protein folding (GO:0006457), Molecular Function: unfolded protein binding (GO:0051082
AT3G44110	AT3G44110.1	420	HMMPfam	PF01556	DnaJ_C	251	352	5.7e-28	IPR002939	Chaperone DnaJ, C-terminal;Biological Process: protein folding (GO:0006457), Molecular Function: unfolded protein binding (GO:0051082
AT3G44600	AT3G44600.1	631	HMMPfam	PF00160	Pro_isomerase	479	627	2.1e-49	IPR002130	Peptidyl-prolyl cis-trans isomerase, cyclophilin-type;Molecular Function: peptidyl-prolyl cis-trans isomerase activity (GO:0003755), Biological Process: protein folding (GO:0006457
AT3G44600	AT3G44600.1	631	HMMPfam	PF00400	WD40	67	97	0.44	IPR019781	WD40 repeat, subgrou
AT3G44600	AT3G44600.1	631	HMMPfam	PF00400	WD40	108	141	44	IPR019781	WD40 repeat, subgrou
AT3G44890	AT3G44890.1	197	HMMPfam	PF01281	Ribosomal_L9_N	51	97	2e-15	IPR020070	Ribosomal protein L9, N-termina
AT3G44890	AT3G44890.1	197	HMMPfam	PF03948	Ribosomal_L9_C	111	196	1.3e-18	IPR020069	Ribosomal protein L9, C-termina
AT3G45780	AT3G45780.1;AT3G45780.2	996	HMMPfam	PF00069	Pkinase	665	952	4.70000000000003e-59	IPR017442	Serine/threonine-protein kinase-like domain;Molecular Function: protein kinase activity (GO:0004672), Molecular Function: ATP binding (GO:0005524), Biological Process: protein amino acid phosphorylation (GO:0006468
AT3G45780	AT3G45780.1;AT3G45780.2	996	HMMPfam	PF00989	PAS	211	296	0.009	IPR013767	PAS fold;Biological Process: regulation of transcription, DNA-dependent (GO:0006355
AT3G45780	AT3G45780.1;AT3G45780.2	996	HMMPfam	PF00989	PAS	488	577	0.00056	IPR013767	PAS fold;Biological Process: regulation of transcription, DNA-dependent (GO:0006355
AT3G46740	AT3G46740.1	818	HMMPfam	PF01103	Bac_surface_Ag	486	816	2.3e-25	IPR000184	Bacterial surface antigen (D15);Cellular Component: outer membrane (GO:0019867
AT3G46740	AT3G46740.1	818	HMMPfam	PF07244	Surf_Ag_VNR	381	447	0.00860000000000001	IPR010827	Surface antigen variable number;Cellular Component: outer membrane (GO:0019867
AT3G46780	AT3G46780.1	510	HMMPfam	PF05368	NmrA	94	207	4.4e-05	IPR008030	NmrA-lik
AT3G47800	AT3G47800.1	358	HMMPfam	PF01263	Aldose_epim	33	353	2.39999999999997e-93	IPR008183	Aldose 1-epimerase;Biological Process: carbohydrate metabolic process (GO:0005975), Molecular Function: isomerase activity (GO:0016853
AT3G50670	AT3G50670.1	427	HMMPfam	PF00076	RRM_1	140	209	9.1e-18	IPR000504	RNA recognition motif, RNP-1;Molecular Function: nucleic acid binding (GO:0003676
AT3G50670	AT3G50670.2;AT3G50670.1	204;427	HMMPfam	PF12220	U1snRNP70_N	39	130	1.2e-19;6.9e-22	IPR022023	U1 small nuclear ribonucleoprotein of 70kDa MW N-termina
AT3G50820	AT3G50820.1	331	HMMPfam	PF01716	MSP	95	331	1.10000000000001e-105	IPR002628	Photosystem II manganese-stabilising protein PsbO;Molecular Function: calcium ion binding (GO:0005509), Cellular Component: oxygen evolving complex (GO:0009654), Biological Process: photosynthesis (GO:0015979), Cellular Component: extrinsic to membrane (GO:0019898), Biological Process: photosystem II stabilization (GO:0042549
AT3G52500	AT3G52500.1	469	HMMPfam	PF00026	Asp	90	151	0.0068	IPR001461	Peptidase A1;Molecular Function: aspartic-type endopeptidase activity (GO:0004190), Biological Process: proteolysis (GO:0006508
AT3G52500	AT3G52500.1	469	HMMPfam	PF00026	Asp	187	464	4.20000000000001e-06	IPR001461	Peptidase A1;Molecular Function: aspartic-type endopeptidase activity (GO:0004190), Biological Process: proteolysis (GO:0006508
AT3G52930	AT3G52930.1	358	HMMPfam	PF00274	Glycolytic	11	358	0	IPR000741	Fructose-bisphosphate aldolase, class-I;Molecular Function: fructose-bisphosphate aldolase activity (GO:0004332), Biological Process: glycolysis (GO:0006096
AT3G53460	AT3G53460.4	363	HMMPfam	PF00076	RRM_1	101	163	1.5e-16	IPR000504	RNA recognition motif, RNP-1;Molecular Function: nucleic acid binding (GO:0003676
AT3G53460	AT3G53460.3;AT3G53460.2;AT3G53460.1	342	HMMPfam	PF00076	RRM_1	101	171	1.4e-19	IPR000504	RNA recognition motif, RNP-1;Molecular Function: nucleic acid binding (GO:0003676
AT3G53460	AT3G53460.3;AT3G53460.2;AT3G53460.1	342	HMMPfam	PF00076	RRM_1	259	329	2.8e-20	IPR000504	RNA recognition motif, RNP-1;Molecular Function: nucleic acid binding (GO:0003676
AT3G53460	AT3G53460.4	363	HMMPfam	PF00076	RRM_1	280	350	3.1e-20	IPR000504	RNA recognition motif, RNP-1;Molecular Function: nucleic acid binding (GO:0003676
AT3G54400	AT3G54400.1	425	HMMPfam	PF00026	Asp	88	397	1.1e-14	IPR001461	Peptidase A1;Molecular Function: aspartic-type endopeptidase activity (GO:0004190), Biological Process: proteolysis (GO:0006508
AT3G54540	AT3G54540.1	723	HMMPfam	PF00005	ABC_tran	254	348	3.1e-11	IPR003439	ABC transporter-like;Molecular Function: ATP binding (GO:0005524), Molecular Function: ATPase activity (GO:0016887
AT3G54540	AT3G54540.1	723	HMMPfam	PF00005	ABC_tran	537	648	2.1e-14	IPR003439	ABC transporter-like;Molecular Function: ATP binding (GO:0005524), Molecular Function: ATPase activity (GO:0016887
AT3G55220	AT3G55220.1	1214	HMMPfam	PF03178	CPSF_A	861	1180	4.49999999999996e-94	IPR004871	Cleavage/polyadenylation specificity factor, A subunit, C-terminal;Molecular Function: nucleic acid binding (GO:0003676), Cellular Component: nucleus (GO:0005634
AT3G57560	AT3G57560.1	347	HMMPfam	PF00696	AA_kinase	86	323	2.89999999999999e-38	IPR001048	Aspartate/glutamate/uridylate kinase;Biological Process: cellular amino acid biosynthetic process (GO:0008652
AT3G58510	AT3G58510.1;AT3G58510.2;AT3G58510.3	612	HMMPfam	PF00270	DEAD	175	354	7.20000000000003e-47	IPR011545	DNA/RNA helicase, DEAD/DEAH box type, N-terminal;Molecular Function: nucleic acid binding (GO:0003676), Molecular Function: ATP binding (GO:0005524), Molecular Function: ATP-dependent helicase activity (GO:0008026
AT3G58510	AT3G58510.1;AT3G58510.2;AT3G58510.3	612	HMMPfam	PF00271	Helicase_C	431	503	1.3e-23	IPR001650	DNA/RNA helicase, C-terminal;Molecular Function: nucleic acid binding (GO:0003676), Molecular Function: helicase activity (GO:0004386), Molecular Function: ATP binding (GO:0005524
AT3G62120	AT3G62120.1;AT3G62120.2	530	HMMPfam	PF00587	tRNA-synt_2b	92	248	8.5e-15	IPR002314	Aminoacyl-tRNA synthetase, class II (G/ H/ P/ S), conserved domain;Molecular Function: nucleotide binding (GO:0000166), Molecular Function: aminoacyl-tRNA ligase activity (GO:0004812), Molecular Function: ATP binding (GO:0005524), Cellular Component: cytoplasm (GO:0005737), Biological Process: translation (GO:0006412), Biological Process: tRNA aminoacylation for protein translation (GO:0006418
AT3G62120	AT3G62120.1;AT3G62120.2	530	HMMPfam	PF03129	HGTP_anticodon	334	431	5.90000000000001e-18	IPR004154	Anticodon-binding;Molecular Function: aminoacyl-tRNA ligase activity (GO:0004812), Molecular Function: ATP binding (GO:0005524), Biological Process: translation (GO:0006412
AT3G62120	AT3G62120.1;AT3G62120.2	530	HMMPfam	PF09180	ProRS-C_1	457	530	4.00000000000001e-21	IPR016061	Prolyl-tRNA synthetase, class II, C-terminal;Molecular Function: nucleotide binding (GO:0000166), Molecular Function: proline-tRNA ligase activity (GO:0004827), Molecular Function: ATP binding (GO:0005524), Cellular Component: cytoplasm (GO:0005737), Biological Process: translation (GO:0006412), Biological Process: prolyl-tRNA aminoacylation (GO:0006433
AT3G63140	AT3G63140.1	406	HMMPfam	PF01370	Epimerase	157	300	0.00045	IPR001509	NAD-dependent epimerase/dehydratase;Molecular Function: catalytic activity (GO:0003824), Biological Process: cellular metabolic process (GO:0044237), Molecular Function: coenzyme binding (GO:0050662
AT4G01130	AT4G01130.1	382	HMMPfam	PF00657	Lipase_GDSL	35	364	4.80000000000003e-41	IPR001087	Lipase, GDSL;Biological Process: lipid metabolic process (GO:0006629), Molecular Function: hydrolase activity, acting on ester bonds (GO:0016788
AT4G01900	AT4G01900.1	196	HMMPfam	PF00543	P-II	77	179	1.1e-31	IPR002187	Nitrogen regulatory protein PII;Biological Process: regulation of nitrogen utilization (GO:0006808), Molecular Function: enzyme regulator activity (GO:0030234
AT4G02840	AT4G02840.1	116	HMMPfam	PF01423	LSM	6	70	4.2e-14	IPR001163	Like-Sm ribonucleoprotein (LSM) domai
AT4G02840	AT4G02840.2	126	HMMPfam	PF01423	LSM	40	80	3.4e-06	IPR001163	Like-Sm ribonucleoprotein (LSM) domai
AT4G03280	AT4G03280.2	210	HMMPfam	PF00355	Rieske	118	177	3.4e-14	IPR017941	Rieske [2Fe-2S] iron-sulphur domain;Molecular Function: oxidoreductase activity (GO:0016491), Molecular Function: 2 iron, 2 sulfur cluster binding (GO:0051537), Biological Process: oxidation reduction (GO:0055114
AT4G03280	AT4G03280.1	229	HMMPfam	PF00355	Rieske	137	196	5.2e-17	IPR017941	Rieske [2Fe-2S] iron-sulphur domain;Molecular Function: oxidoreductase activity (GO:0016491), Molecular Function: 2 iron, 2 sulfur cluster binding (GO:0051537), Biological Process: oxidation reduction (GO:0055114
AT4G03280	AT4G03280.2	210	HMMPfam	PF08802	CytB6-F_Fe-S	38	76	1.3e-16	IPR014909	Cytochrome b6-f complex Fe-S subunit;Molecular Function: plastoquinol-plastocyanin reductase activity (GO:0009496), Cellular Component: thylakoid membrane (GO:0042651), Molecular Function: 2 iron, 2 sulfur cluster binding (GO:0051537), Biological Process: oxidation reduction (GO:0055114
AT4G03280	AT4G03280.1	229	HMMPfam	PF08802	CytB6-F_Fe-S	57	95	1.8e-19	IPR014909	Cytochrome b6-f complex Fe-S subunit;Molecular Function: plastoquinol-plastocyanin reductase activity (GO:0009496), Cellular Component: thylakoid membrane (GO:0042651), Molecular Function: 2 iron, 2 sulfur cluster binding (GO:0051537), Biological Process: oxidation reduction (GO:0055114
AT4G04640	AT4G04640.1	373	HMMPfam	PF00231	ATP-synt	51	371	1e-95	IPR000131	ATPase, F1 complex, gamma subunit;Biological Process: ATP synthesis coupled proton transport (GO:0015986), Cellular Component: proton-transporting ATP synthase complex, catalytic core F(1) (GO:0045261), Molecular Function: hydrogen ion transporting ATP synthase activity, rotational mechanism (GO:0046933), Molecular Function: proton-transporting ATPase activity, rotational mechanism (GO:0046961
AT4G05530	AT4G05530.1	254	HMMPfam	PF00106	adh_short	12	177	2.5e-21	IPR002198	Short-chain dehydrogenase/reductase SDR;Biological Process: metabolic process (GO:0008152), Molecular Function: oxidoreductase activity (GO:0016491
AT4G08350	AT4G08350.1	1041	HMMPfam	PF00467	KOW	480	505	3.8e-05	IPR005824	KO
AT4G08350	AT4G08350.1	1041	HMMPfam	PF03439	Spt5-NGN	183	265	8.5e-27	IPR005100	Transcription elongation factor Spt5, NGN domai
AT4G08950	AT4G08950.1	314	HMMPfam	PF04674	Phi_1	35	314	5.09999999999993e-126	IPR006766	Phosphate-induced protein
AT4G09010	AT4G09010.1	349	HMMPfam	PF00141	peroxidase	102	273	6.1e-21	IPR002016	Haem peroxidase, plant/fungal/bacterial;Molecular Function: peroxidase activity (GO:0004601), Biological Process: response to oxidative stress (GO:0006979), Molecular Function: heme binding (GO:0020037), Biological Process: oxidation reduction (GO:0055114
AT4G10340	AT4G10340.1	280	HMMPfam	PF00504	Chloroa_b-bind	82	243	4.10000000000004e-43	NULL	NUL
AT4G10710	AT4G10710.1	1074	HMMPfam	PF00557	Peptidase_M24	209	440	2.4e-25	IPR000994	Peptidase M24, structural domain;Biological Process: cellular process (GO:0009987
AT4G10710	AT4G10710.1	1074	HMMPfam	PF08512	Rtt106	855	1011	5.29999999999999e-13	IPR013719	Domain of unknown function DUF1747, eukaryot
AT4G10710	AT4G10710.1	1074	HMMPfam	PF08644	SPT16	555	708	4.9e-50	IPR013953	FACT complex subunit Spt16p/Cdc68
AT4G10750	AT4G10750.1	358	HMMPfam	PF03328	HpcH_HpaI	91	321	4.70000000000003e-61	IPR005000	HpcH/HpaI aldolase;Biological Process: cellular aromatic compound metabolic process (GO:0006725), Molecular Function: carbon-carbon lyase activity (GO:0016830
AT4G11010	AT4G11010.1	238	HMMPfam	PF00334	NDK	89	222	1.6e-50	IPR001564	Nucleoside diphosphate kinase, core;Molecular Function: nucleoside diphosphate kinase activity (GO:0004550), Molecular Function: ATP binding (GO:0005524), Biological Process: GTP biosynthetic process (GO:0006183), Biological Process: UTP biosynthetic process (GO:0006228), Biological Process: CTP biosynthetic process (GO:0006241
AT4G13340	AT4G13340.1	760	HMMPfam	PF08263	LRRNT_2	72	105	0.00089	IPR013210	Leucine-rich repeat-containing N-terminal domain, type
AT4G16143	AT4G16143.1;AT4G16143.2	535	HMMPfam	PF00514	Arm	110	150	1.7e-10	IPR000225	Armadill
AT4G16143	AT4G16143.1;AT4G16143.2	535	HMMPfam	PF00514	Arm	152	191	1e-13	IPR000225	Armadill
AT4G16143	AT4G16143.1;AT4G16143.2	535	HMMPfam	PF00514	Arm	194	235	7.3e-08	IPR000225	Armadill
AT4G16143	AT4G16143.1;AT4G16143.2	535	HMMPfam	PF00514	Arm	248	276	1.4e-07	IPR000225	Armadill
AT4G16143	AT4G16143.1;AT4G16143.2	535	HMMPfam	PF00514	Arm	279	317	7.7e-10	IPR000225	Armadill
AT4G16143	AT4G16143.1;AT4G16143.2	535	HMMPfam	PF00514	Arm	321	361	1e-08	IPR000225	Armadill
AT4G16143	AT4G16143.1;AT4G16143.2	535	HMMPfam	PF00514	Arm	363	402	2.4e-11	IPR000225	Armadill
AT4G16143	AT4G16143.1;AT4G16143.2	535	HMMPfam	PF00514	Arm	406	445	3.2e-07	IPR000225	Armadill
AT4G16143	AT4G16143.1;AT4G16143.2	535	HMMPfam	PF01749	IBB	5	100	9.9e-28	IPR002652	Importin-alpha-like, importin-beta-binding domain;Cellular Component: nucleus (GO:0005634), Cellular Component: nuclear pore (GO:0005643), Cellular Component: cytoplasm (GO:0005737), Biological Process: protein import into nucleus (GO:0006606), Biological Process: intracellular protein transport (GO:0006886), Molecular Function: protein transporter activity (GO:0008565
AT4G16210	AT4G16210.1	265	HMMPfam	PF00378	ECH	20	185	5.59999999999999e-38	IPR001753	Crotonase, core;Molecular Function: catalytic activity (GO:0003824), Biological Process: metabolic process (GO:0008152
AT4G20360	AT4G20360.1	476	HMMPfam	PF00009	GTP_EFTU	77	278	2.1e-60	IPR000795	Protein synthesis factor, GTP-binding;Molecular Function: GTPase activity (GO:0003924), Molecular Function: GTP binding (GO:0005525
AT4G20360	AT4G20360.1	476	HMMPfam	PF03143	GTP_EFTU_D3	375	474	1.80000000000002e-36	IPR004160	Translation elongation factor EFTu/EF1A, C-terminal;Molecular Function: GTP binding (GO:0005525
AT4G20360	AT4G20360.1	476	HMMPfam	PF03144	GTP_EFTU_D2	302	371	7.79999999999999e-15	IPR004161	Translation elongation factor EFTu/EF1A, domain 2;Molecular Function: GTP binding (GO:0005525
AT4G21280	AT4G21280.1	223	HMMPfam	PF05757	PsbQ	32	223	5.80000000000004e-82	IPR008797	Photosystem II oxygen evolving complex protein PsbQ;Molecular Function: calcium ion binding (GO:0005509), Cellular Component: oxygen evolving complex (GO:0009654), Biological Process: photosynthesis (GO:0015979), Cellular Component: extrinsic to membrane (GO:0019898
AT4G21280	AT4G21280.2	224	HMMPfam	PF05757	PsbQ	32	224	1.2e-82	IPR008797	Photosystem II oxygen evolving complex protein PsbQ;Molecular Function: calcium ion binding (GO:0005509), Cellular Component: oxygen evolving complex (GO:0009654), Biological Process: photosynthesis (GO:0015979), Cellular Component: extrinsic to membrane (GO:0019898
AT4G21660	AT4G21660.1	584	HMMPfam	PF04037	DUF382	173	300	4.10000000000004e-58	IPR007180	Protein of unknown function DUF382;Cellular Component: nucleus (GO:0005634), Biological Process: mRNA processing (GO:0006397
AT4G21660	AT4G21660.2	598	HMMPfam	PF04037	DUF382	173	314	1.3e-53	IPR007180	Protein of unknown function DUF382;Cellular Component: nucleus (GO:0005634), Biological Process: mRNA processing (GO:0006397
AT4G21660	AT4G21660.1	584	HMMPfam	PF04046	PSP	308	355	6.19999999999999e-20	IPR006568	PSP, proline-ric
AT4G21660	AT4G21660.2	598	HMMPfam	PF04046	PSP	322	369	8e-23	IPR006568	PSP, proline-ric
AT4G24350	AT4G24350.2	242	HMMPfam	PF01048	PNP_UDP_1	10	237	1.8e-35	IPR000845	Nucleoside phosphorylase;Molecular Function: catalytic activity (GO:0003824), Biological Process: nucleoside metabolic process (GO:0009116
AT4G24350	AT4G24350.1	336	HMMPfam	PF01048	PNP_UDP_1	48	331	3.40000000000004e-44	IPR000845	Nucleoside phosphorylase;Molecular Function: catalytic activity (GO:0003824), Biological Process: nucleoside metabolic process (GO:0009116
AT4G25210	AT4G25210.1	368	HMMPfam	PF04504	DUF573	139	239	6.19999999999999e-30	IPR007592	Protein of unknown function DUF57
AT4G25900	AT4G25900.1	318	HMMPfam	PF01263	Aldose_epim	42	307	2.89999999999999e-59	IPR008183	Aldose 1-epimerase;Biological Process: carbohydrate metabolic process (GO:0005975), Molecular Function: isomerase activity (GO:0016853
AT4G26650	AT4G26650.2	452	HMMPfam	PF00076	RRM_1	14	81	3.5e-17	IPR000504	RNA recognition motif, RNP-1;Molecular Function: nucleic acid binding (GO:0003676
AT4G26650	AT4G26650.1	455	HMMPfam	PF00076	RRM_1	17	84	2.80000000000001e-14	IPR000504	RNA recognition motif, RNP-1;Molecular Function: nucleic acid binding (GO:0003676
AT4G26650	AT4G26650.2	452	HMMPfam	PF00076	RRM_1	121	187	8.7e-18	IPR000504	RNA recognition motif, RNP-1;Molecular Function: nucleic acid binding (GO:0003676
AT4G26650	AT4G26650.1	455	HMMPfam	PF00076	RRM_1	124	190	7e-15	IPR000504	RNA recognition motif, RNP-1;Molecular Function: nucleic acid binding (GO:0003676
AT4G27440	AT4G27440.1;AT4G27440.2	401	HMMPfam	PF00106	adh_short	90	231	1.6e-18	IPR002198	Short-chain dehydrogenase/reductase SDR;Biological Process: metabolic process (GO:0008152), Molecular Function: oxidoreductase activity (GO:0016491
AT4G28480	AT4G28480.1;AT4G28480.2	348;290	HMMPfam	PF00226	DnaJ	4	67	2.3e-25;1.69999999999999e-25	IPR001623	Heat shock protein DnaJ, N-terminal;Molecular Function: heat shock protein binding (GO:0031072
AT4G28480	AT4G28480.2	290	HMMPfam	PF01556	DnaJ_C	185	283	3.09999999999998e-26	IPR002939	Chaperone DnaJ, C-terminal;Biological Process: protein folding (GO:0006457), Molecular Function: unfolded protein binding (GO:0051082
AT4G28480	AT4G28480.1	348	HMMPfam	PF01556	DnaJ_C	243	340	4.5e-26	IPR002939	Chaperone DnaJ, C-terminal;Biological Process: protein folding (GO:0006457), Molecular Function: unfolded protein binding (GO:0051082
AT4G28520	AT4G28520.1;AT4G28520.4;AT4G28520.2;AT4G28520.3	524;396;394;453	HMMPfam	PF00190	Cupin_1	45	253	1.99999999999999e-41;9.60000000000004e-43;1.3e-45;1.8e-44	IPR006045	Cupin 1;Molecular Function: nutrient reservoir activity (GO:0045735
AT4G28520	AT4G28520.3	453	HMMPfam	PF00190	Cupin_1	285	423	3.7e-26	IPR006045	Cupin 1;Molecular Function: nutrient reservoir activity (GO:0045735
AT4G28520	AT4G28520.1	524	HMMPfam	PF00190	Cupin_1	347	494	3.2e-24	IPR006045	Cupin 1;Molecular Function: nutrient reservoir activity (GO:0045735
AT4G30610	AT4G30610.1	465	HMMPfam	PF00450	Peptidase_S10	37	458	0	IPR001563	Peptidase S10, serine carboxypeptidase;Molecular Function: serine-type carboxypeptidase activity (GO:0004185), Biological Process: proteolysis (GO:0006508
AT4G30690	AT4G30690.2	253	HMMPfam	PF00707	IF3_C	140	220	2.7e-21	IPR019815	Translation initiation factor 3, C-terminal;Molecular Function: translation initiation factor activity (GO:0003743), Biological Process: translational initiation (GO:0006413
AT4G30690	AT4G30690.1	281	HMMPfam	PF00707	IF3_C	163	248	3.39999999999999e-21	IPR019815	Translation initiation factor 3, C-terminal;Molecular Function: translation initiation factor activity (GO:0003743), Biological Process: translational initiation (GO:0006413
AT4G30690	AT4G30690.2	253	HMMPfam	PF05198	IF3_N	89	143	2.3e-19	IPR019814	Translation initiation factor 3, N-terminal;Molecular Function: translation initiation factor activity (GO:0003743), Biological Process: translational initiation (GO:0006413
AT4G30690	AT4G30690.1	281	HMMPfam	PF05198	IF3_N	89	157	1.1e-24	IPR019814	Translation initiation factor 3, N-terminal;Molecular Function: translation initiation factor activity (GO:0003743), Biological Process: translational initiation (GO:0006413
AT4G31180	AT4G31180.1;AT4G31180.2	558	HMMPfam	PF00152	tRNA-synt_2	233	552	1.9e-68	IPR004364	Aminoacyl-tRNA synthetase, class II (D/K/N);Molecular Function: nucleotide binding (GO:0000166), Molecular Function: aminoacyl-tRNA ligase activity (GO:0004812), Molecular Function: ATP binding (GO:0005524), Cellular Component: cytoplasm (GO:0005737), Biological Process: translation (GO:0006412), Biological Process: tRNA aminoacylation for protein translation (GO:0006418
AT4G31180	AT4G31180.1;AT4G31180.2	558	HMMPfam	PF01336	tRNA_anti	110	195	1e-04	IPR004365	Nucleic acid binding, OB-fold, tRNA/helicase-type;Molecular Function: nucleic acid binding (GO:0003676
AT4G34200	AT4G34200.1	603	HMMPfam	PF00389	2-Hacid_dh	64	373	6.50000000000001e-30	IPR006139	D-isomer specific 2-hydroxyacid dehydrogenase, catalytic domain;Biological Process: metabolic process (GO:0008152), Molecular Function: oxidoreductase activity, acting on the CH-OH group of donors, NAD or NADP as acceptor (GO:0016616), Molecular Function: NAD or NADH binding (GO:0051287
AT4G34200	AT4G34200.1	603	HMMPfam	PF01842	ACT	532	592	0.0078	IPR002912	Amino acid-binding ACT;Biological Process: metabolic process (GO:0008152), Molecular Function: amino acid binding (GO:0016597
AT4G34200	AT4G34200.1	603	HMMPfam	PF02826	2-Hacid_dh_C	166	341	7.89999999999997e-60	IPR006140	D-isomer specific 2-hydroxyacid dehydrogenase, NAD-binding;Molecular Function: oxidoreductase activity, acting on the CH-OH group of donors, NAD or NADP as acceptor (GO:0016616), Molecular Function: cofactor binding (GO:0048037
AT4G35000	AT4G35000.1	287	HMMPfam	PF00141	peroxidase	19	224	1.5e-45	IPR002016	Haem peroxidase, plant/fungal/bacterial;Molecular Function: peroxidase activity (GO:0004601), Biological Process: response to oxidative stress (GO:0006979), Molecular Function: heme binding (GO:0020037), Biological Process: oxidation reduction (GO:0055114
AT4G35090	AT4G35090.2;AT4G35090.1	474;492	HMMPfam	PF00199	Catalase	18	399	0;5.1e-183	IPR018028	Catalase related subgrou
AT4G35090	AT4G35090.2	474	HMMPfam	PF06628	Catalase-rel	419	474	5.10000000000001e-10	IPR010582	Catalase-related immune responsive;Molecular Function: catalase activity (GO:0004096), Molecular Function: iron ion binding (GO:0005506), Biological Process: response to oxidative stress (GO:0006979), Molecular Function: heme binding (GO:0020037), Biological Process: oxidation reduction (GO:0055114
AT4G35090	AT4G35090.1	492	HMMPfam	PF06628	Catalase-rel	419	487	2.3e-19	IPR010582	Catalase-related immune responsive;Molecular Function: catalase activity (GO:0004096), Molecular Function: iron ion binding (GO:0005506), Biological Process: response to oxidative stress (GO:0006979), Molecular Function: heme binding (GO:0020037), Biological Process: oxidation reduction (GO:0055114
AT4G35250	AT4G35250.1	395	HMMPfam	PF05368	NmrA	82	304	3.2e-21	IPR008030	NmrA-lik
AT4G35630	AT4G35630.1	430	HMMPfam	PF00266	Aminotran_5	73	418	1.6e-49	IPR000192	Aminotransferase, class V/Cysteine desulfurase;Biological Process: metabolic process (GO:0008152
AT4G36730	AT4G36730.2	313	HMMPfam	PF00170	bZIP_1	218	280	2.2e-19	IPR011616	bZIP transcription factor, bZIP-1;Molecular Function: transcription factor activity (GO:0003700), Biological Process: regulation of transcription, DNA-dependent (GO:0006355), Molecular Function: sequence-specific DNA binding (GO:0043565), Molecular Function: protein dimerization activity (GO:0046983
AT4G36730	AT4G36730.1	315	HMMPfam	PF00170	bZIP_1	220	282	2.9e-22	IPR011616	bZIP transcription factor, bZIP-1;Molecular Function: transcription factor activity (GO:0003700), Biological Process: regulation of transcription, DNA-dependent (GO:0006355), Molecular Function: sequence-specific DNA binding (GO:0043565), Molecular Function: protein dimerization activity (GO:0046983
AT4G36730	AT4G36730.2	313	HMMPfam	PF07777	MFMR	1	159	1.80000000000002e-35	IPR012900	G-box binding, MFMR;Molecular Function: DNA binding (GO:0003677), Cellular Component: nucleus (GO:0005634), Biological Process: transcription, DNA-dependent (GO:0006351), Biological Process: regulation of transcription (GO:0045449
AT4G36730	AT4G36730.1	315	HMMPfam	PF07777	MFMR	1	160	2.9e-38	IPR012900	G-box binding, MFMR;Molecular Function: DNA binding (GO:0003677), Cellular Component: nucleus (GO:0005634), Biological Process: transcription, DNA-dependent (GO:0006351), Biological Process: regulation of transcription (GO:0045449
AT4G38970	AT4G38970.2	381	HMMPfam	PF00274	Glycolytic	54	308	1.29999999999998e-120	IPR000741	Fructose-bisphosphate aldolase, class-I;Molecular Function: fructose-bisphosphate aldolase activity (GO:0004332), Biological Process: glycolysis (GO:0006096
AT4G38970	AT4G38970.1	398	HMMPfam	PF00274	Glycolytic	54	398	2e-167	IPR000741	Fructose-bisphosphate aldolase, class-I;Molecular Function: fructose-bisphosphate aldolase activity (GO:0004332), Biological Process: glycolysis (GO:0006096
AT4G39100	AT4G39100.1	228	HMMPfam	PF00628	PHD	141	189	1.3e-08	IPR019787	Zinc finger, PHD-finge
AT4G39100	AT4G39100.1;AT4G39100.2	228;169	HMMPfam	PF01426	BAH	23	136	5.20000000000001e-21;2.8e-24	IPR001025	Bromo adjacent homology (BAH) domain;Molecular Function: DNA binding (GO:0003677
AT4G39640	AT4G39640.1;AT4G39640.2	572	HMMPfam	PF01019	G_glu_transpept	48	567	0	IPR000101	Gamma-glutamyltranspeptidase;Molecular Function: gamma-glutamyltransferase activity (GO:0003840
AT4G39680	AT4G39680.1;AT4G39680.2	633	HMMPfam	PF02037	SAP	15	48	4.9e-07	IPR003034	DNA-binding SAP;Molecular Function: nucleic acid binding (GO:0003676
AT4G39960	AT4G39960.1	447	HMMPfam	PF00226	DnaJ	85	146	3.09999999999998e-24	IPR001623	Heat shock protein DnaJ, N-terminal;Molecular Function: heat shock protein binding (GO:0031072
AT4G39960	AT4G39960.1	447	HMMPfam	PF00684	DnaJ_CXXCXGXG	217	293	1.6e-15	IPR001305	Heat shock protein DnaJ, cysteine-rich domain;Biological Process: protein folding (GO:0006457), Molecular Function: heat shock protein binding (GO:0031072), Molecular Function: unfolded protein binding (GO:0051082
AT4G39960	AT4G39960.1	447	HMMPfam	PF01556	DnaJ_C	331	429	1.1e-24	IPR002939	Chaperone DnaJ, C-terminal;Biological Process: protein folding (GO:0006457), Molecular Function: unfolded protein binding (GO:0051082
AT5G02500	AT5G02500.2	521	HMMPfam	PF00012	HSP70	9	389	1.8e-190	IPR013126	Heat shock protein 7
AT5G02500	AT5G02500.1	651	HMMPfam	PF00012	HSP70	9	618	1.7e-275	IPR013126	Heat shock protein 7
AT5G02500	AT5G02500.2	521	HMMPfam	PF00012	HSP70	392	488	1.4e-13	IPR013126	Heat shock protein 7
AT5G02530	AT5G02530.1;AT5G02530.2	292;290	HMMPfam	PF00076	RRM_1	110	178	4.9e-11;4.80000000000001e-11	IPR000504	RNA recognition motif, RNP-1;Molecular Function: nucleic acid binding (GO:0003676
AT5G03406	AT5G03406.1	263	HMMPfam	PF00587	tRNA-synt_2b	85	244	6.3e-24	IPR002314	Aminoacyl-tRNA synthetase, class II (G/ H/ P/ S), conserved domain;Molecular Function: nucleotide binding (GO:0000166), Molecular Function: aminoacyl-tRNA ligase activity (GO:0004812), Molecular Function: ATP binding (GO:0005524), Cellular Component: cytoplasm (GO:0005737), Biological Process: translation (GO:0006412), Biological Process: tRNA aminoacylation for protein translation (GO:0006418
AT5G04280	AT5G04280.1	310	HMMPfam	PF00076	RRM_1	9	78	7.4e-19	IPR000504	RNA recognition motif, RNP-1;Molecular Function: nucleic acid binding (GO:0003676
AT5G04280	AT5G04280.1	310	HMMPfam	PF00098	zf-CCHC	127	143	2.2e-05	IPR001878	Zinc finger, CCHC-type;Molecular Function: nucleic acid binding (GO:0003676), Molecular Function: zinc ion binding (GO:0008270
AT5G06160	AT5G06160.1	504	HMMPfam	PF11931	DUF3449	324	503	5.59999999999999e-69	NULL	NUL
AT5G06160	AT5G06160.1	504	HMMPfam	PF12108	SF3a60_bindingd	79	106	4.80000000000001e-11	IPR021966	Splicing factor SF3a60 binding domai
AT5G09440	AT5G09440.1	278	HMMPfam	PF04674	Phi_1	31	278	8.70000000000003e-101	IPR006766	Phosphate-induced protein
AT5G09660	AT5G09660.2;AT5G09660.3	333;342	HMMPfam	PF00056	Ldh_1_N	23	164	1.2e-44;1.29999999999998e-44	IPR001236	Lactate/malate dehydrogenase, N-terminal;Molecular Function: oxidoreductase activity (GO:0016491), Biological Process: oxidation reduction (GO:0055114
AT5G09660	AT5G09660.4;AT5G09660.1	363;354	HMMPfam	PF00056	Ldh_1_N	44	185	1.5e-44;1.8e-47	IPR001236	Lactate/malate dehydrogenase, N-terminal;Molecular Function: oxidoreductase activity (GO:0016491), Biological Process: oxidation reduction (GO:0055114
AT5G09660	AT5G09660.3	342	HMMPfam	PF02866	Ldh_1_C	167	280	1e-32	IPR022383	Lactate/malate dehydrogenase, C-termina
AT5G09660	AT5G09660.2	333	HMMPfam	PF02866	Ldh_1_C	167	331	2.29999999999998e-46	IPR022383	Lactate/malate dehydrogenase, C-termina
AT5G09660	AT5G09660.4	363	HMMPfam	PF02866	Ldh_1_C	188	301	1.2e-32	IPR022383	Lactate/malate dehydrogenase, C-termina
AT5G09660	AT5G09660.1	354	HMMPfam	PF02866	Ldh_1_C	188	352	3.3e-49	IPR022383	Lactate/malate dehydrogenase, C-termina
AT5G12190	AT5G12190.1	124	HMMPfam	PF00076	RRM_1	21	87	7.90000000000001e-16	IPR000504	RNA recognition motif, RNP-1;Molecular Function: nucleic acid binding (GO:0003676
AT5G14660	AT5G14660.1;AT5G14660.2	273	HMMPfam	PF01327	Pep_deformylase	81	230	2.4e-47	IPR000181	Formylmethionine deformylase;Molecular Function: iron ion binding (GO:0005506), Biological Process: translation (GO:0006412), Molecular Function: peptide deformylase activity (GO:0042586
AT5G17920	AT5G17920.1;AT5G17920.2	765	HMMPfam	PF01717	Meth_synt_2	432	755	0	IPR002629	Methionine synthase, vitamin-B12 independent;Molecular Function: 5-methyltetrahydropteroyltriglutamate-homocysteine S-methyltransferase activity (GO:0003871), Biological Process: methionine biosynthetic process (GO:0009086
AT5G17920	AT5G17920.1;AT5G17920.2	765	HMMPfam	PF08267	Meth_synt_1	3	315	6.90000000000007e-114	IPR013215	Cobalamin (vitamin B12)-independent methionine synthase MetE, N-terminal;Molecular Function: 5-methyltetrahydropteroyltriglutamate-homocysteine S-methyltransferase activity (GO:0003871), Molecular Function: zinc ion binding (GO:0008270), Biological Process: cellular amino acid biosynthetic process (GO:0008652
AT5G19220	AT5G19220.1	522	HMMPfam	PF00483	NTP_transferase	92	368	8.49999999999995e-74	IPR005835	Nucleotidyl transferase;Biological Process: biosynthetic process (GO:0009058), Molecular Function: nucleotidyltransferase activity (GO:0016779
AT5G20920	AT5G20920.2	267	HMMPfam	PF01873	eIF-5_eIF-2B	130	249	8.79999999999995e-45	IPR002735	Translation initiation factor IF2/IF5;Molecular Function: translation initiation factor activity (GO:0003743), Biological Process: translational initiation (GO:0006413
AT5G20920	AT5G20920.1;AT5G20920.3	268	HMMPfam	PF01873	eIF-5_eIF-2B	131	250	1.1e-47	IPR002735	Translation initiation factor IF2/IF5;Molecular Function: translation initiation factor activity (GO:0003743), Biological Process: translational initiation (GO:0006413
AT5G22060	AT5G22060.1	419	HMMPfam	PF00226	DnaJ	15	72	9.5e-24	IPR001623	Heat shock protein DnaJ, N-terminal;Molecular Function: heat shock protein binding (GO:0031072
AT5G22060	AT5G22060.1	419	HMMPfam	PF00684	DnaJ_CXXCXGXG	136	215	1.5e-17	IPR001305	Heat shock protein DnaJ, cysteine-rich domain;Biological Process: protein folding (GO:0006457), Molecular Function: heat shock protein binding (GO:0031072), Molecular Function: unfolded protein binding (GO:0051082
AT5G22060	AT5G22060.1	419	HMMPfam	PF01556	DnaJ_C	252	353	1.1e-28	IPR002939	Chaperone DnaJ, C-terminal;Biological Process: protein folding (GO:0006457), Molecular Function: unfolded protein binding (GO:0051082
AT5G23210	AT5G23210.4	363	HMMPfam	PF00450	Peptidase_S10	8	352	6.60000000000002e-100	IPR001563	Peptidase S10, serine carboxypeptidase;Molecular Function: serine-type carboxypeptidase activity (GO:0004185), Biological Process: proteolysis (GO:0006508
AT5G23210	AT5G23210.2	403	HMMPfam	PF00450	Peptidase_S10	8	394	2.50000000000001e-116	IPR001563	Peptidase S10, serine carboxypeptidase;Molecular Function: serine-type carboxypeptidase activity (GO:0004185), Biological Process: proteolysis (GO:0006508
AT5G23210	AT5G23210.3	459	HMMPfam	PF00450	Peptidase_S10	56	448	1.39999999999997e-125	IPR001563	Peptidase S10, serine carboxypeptidase;Molecular Function: serine-type carboxypeptidase activity (GO:0004185), Biological Process: proteolysis (GO:0006508
AT5G23210	AT5G23210.1	499	HMMPfam	PF00450	Peptidase_S10	56	490	5e-145	IPR001563	Peptidase S10, serine carboxypeptidase;Molecular Function: serine-type carboxypeptidase activity (GO:0004185), Biological Process: proteolysis (GO:0006508
AT5G24490	AT5G24490.1	308	HMMPfam	PF02482	Ribosomal_S30AE	83	185	1.1e-19	IPR003489	Ribosomal protein S30Ae/sigma 54 modulation protein;Molecular Function: binding (GO:0005488), Biological Process: primary metabolic process (GO:0044238
AT5G25980	AT5G25980.1;AT5G25980.3	467	HMMPfam	PF00232	Glyco_hydro_1	52	466	1.10000000000001e-128	IPR001360	Glycoside hydrolase, family 1;Molecular Function: hydrolase activity, hydrolyzing O-glycosyl compounds (GO:0004553), Biological Process: carbohydrate metabolic process (GO:0005975
AT5G25980	AT5G25980.2	547	HMMPfam	PF00232	Glyco_hydro_1	52	525	2.4e-157	IPR001360	Glycoside hydrolase, family 1;Molecular Function: hydrolase activity, hydrolyzing O-glycosyl compounds (GO:0004553), Biological Process: carbohydrate metabolic process (GO:0005975
AT5G26830	AT5G26830.1	709	HMMPfam	PF00587	tRNA-synt_2b	347	509	6.7e-47	IPR002314	Aminoacyl-tRNA synthetase, class II (G/ H/ P/ S), conserved domain;Molecular Function: nucleotide binding (GO:0000166), Molecular Function: aminoacyl-tRNA ligase activity (GO:0004812), Molecular Function: ATP binding (GO:0005524), Cellular Component: cytoplasm (GO:0005737), Biological Process: translation (GO:0006412), Biological Process: tRNA aminoacylation for protein translation (GO:0006418
AT5G26830	AT5G26830.1	709	HMMPfam	PF02824	TGS	75	135	3.9e-14	IPR004095	TG
AT5G26830	AT5G26830.1	709	HMMPfam	PF03129	HGTP_anticodon	614	703	3.3e-20	IPR004154	Anticodon-binding;Molecular Function: aminoacyl-tRNA ligase activity (GO:0004812), Molecular Function: ATP binding (GO:0005524), Biological Process: translation (GO:0006412
AT5G26830	AT5G26830.1	709	HMMPfam	PF07973	tRNA_SAD	243	292	1.1e-13	IPR012947	Threonyl/alanyl tRNA synthetase, SAD;Molecular Function: ATP binding (GO:0005524), Cellular Component: cytoplasm (GO:0005737), Biological Process: translation (GO:0006412), Molecular Function: ligase activity, forming aminoacyl-tRNA and related compounds (GO:0016876), Biological Process: tRNA aminoacylation (GO:0043039
AT5G28540	AT5G28540.1	669	HMMPfam	PF00012	HSP70	37	644	0	IPR013126	Heat shock protein 7
AT5G30510	AT5G30510.1	416	HMMPfam	PF00575	S1	97	169	1.2e-05	IPR003029	Ribosomal protein S1, RNA-binding domain;Molecular Function: RNA binding (GO:0003723
AT5G30510	AT5G30510.1	416	HMMPfam	PF00575	S1	184	251	1.6e-07	IPR003029	Ribosomal protein S1, RNA-binding domain;Molecular Function: RNA binding (GO:0003723
AT5G30510	AT5G30510.1	416	HMMPfam	PF00575	S1	262	332	1.3e-19	IPR003029	Ribosomal protein S1, RNA-binding domain;Molecular Function: RNA binding (GO:0003723
AT5G35630	AT5G35630.2;AT5G35630.1;AT5G35630.3	430	HMMPfam	PF00120	Gln-synt_C	162	407	2.4e-62	IPR008146	Glutamine synthetase, catalytic domain;Molecular Function: glutamate-ammonia ligase activity (GO:0004356), Biological Process: nitrogen compound metabolic process (GO:0006807
AT5G35630	AT5G35630.2;AT5G35630.1;AT5G35630.3	430	HMMPfam	PF03951	Gln-synt_N	78	155	2.2e-18	IPR008147	Glutamine synthetase, beta-Grasp;Molecular Function: glutamate-ammonia ligase activity (GO:0004356), Biological Process: glutamine biosynthetic process (GO:0006542), Biological Process: nitrogen compound metabolic process (GO:0006807
AT5G40490	AT5G40490.1	423	HMMPfam	PF00076	RRM_1	44	109	1.3e-13	IPR000504	RNA recognition motif, RNP-1;Molecular Function: nucleic acid binding (GO:0003676
AT5G40490	AT5G40490.1	423	HMMPfam	PF00076	RRM_1	132	201	7.29999999999999e-15	IPR000504	RNA recognition motif, RNP-1;Molecular Function: nucleic acid binding (GO:0003676
AT5G44120	AT5G44120.2	368	HMMPfam	PF00190	Cupin_1	2	95	8.89999999999994e-21	IPR006045	Cupin 1;Molecular Function: nutrient reservoir activity (GO:0045735
AT5G44120	AT5G44120.3	472	HMMPfam	PF00190	Cupin_1	41	199	4.4e-47	IPR006045	Cupin 1;Molecular Function: nutrient reservoir activity (GO:0045735
AT5G44120	AT5G44120.1	285	HMMPfam	PF00190	Cupin_1	109	256	4.8e-28	IPR006045	Cupin 1;Molecular Function: nutrient reservoir activity (GO:0045735
AT5G44120	AT5G44120.2	368	HMMPfam	PF00190	Cupin_1	192	339	7.1e-25	IPR006045	Cupin 1;Molecular Function: nutrient reservoir activity (GO:0045735
AT5G44120	AT5G44120.3	472	HMMPfam	PF00190	Cupin_1	296	443	1.5e-27	IPR006045	Cupin 1;Molecular Function: nutrient reservoir activity (GO:0045735
AT5G44500	AT5G44500.1;AT5G44500.2	254	HMMPfam	PF01423	LSM	11	84	1.3e-13	IPR001163	Like-Sm ribonucleoprotein (LSM) domai
AT5G46070	AT5G46070.1	1082	HMMPfam	PF02263	GBP	51	310	2.2e-63	IPR015894	Guanylate-binding protein, N-terminal;Molecular Function: GTPase activity (GO:0003924), Molecular Function: GTP binding (GO:0005525
AT5G46070	AT5G46070.1	1082	HMMPfam	PF02841	GBP_C	314	618	3.2e-46	IPR003191	Guanylate-binding protein, C-terminal;Molecular Function: GTPase activity (GO:0003924), Molecular Function: GTP binding (GO:0005525
AT5G47500	AT5G47500.1	362	HMMPfam	PF01095	Pectinesterase	61	353	5.00000000000001e-60	IPR000070	Pectinesterase, catalytic;Cellular Component: cell wall (GO:0005618), Molecular Function: pectinesterase activity (GO:0030599), Biological Process: cell wall modification (GO:0042545
AT5G50920	AT5G50920.1	929	HMMPfam	PF00004	AAA	299	428	3.4e-12	IPR003959	ATPase, AAA-type, core;Molecular Function: ATP binding (GO:0005524
AT5G50920	AT5G50920.1	929	HMMPfam	PF02151	UVR	511	545	0.00012	IPR001943	UvrB/UvrC protein;Molecular Function: DNA binding (GO:0003677), Molecular Function: nuclease activity (GO:0004518), Biological Process: nucleotide-excision repair (GO:0006289
AT5G50920	AT5G50920.1	929	HMMPfam	PF02861	Clp_N	109	161	7.20000000000001e-15	IPR004176	Clp, N-terminal;Molecular Function: protein binding (GO:0005515), Biological Process: protein metabolic process (GO:0019538
AT5G50920	AT5G50920.1	929	HMMPfam	PF02861	Clp_N	185	236	1.8e-16	IPR004176	Clp, N-terminal;Molecular Function: protein binding (GO:0005515), Biological Process: protein metabolic process (GO:0019538
AT5G50920	AT5G50920.1	929	HMMPfam	PF07724	AAA_2	636	810	5.69999999999998e-53	IPR013093	ATPase, AAA-2;Molecular Function: ATP binding (GO:0005524
AT5G50920	AT5G50920.1	929	HMMPfam	PF10431	ClpB_D2-small	817	901	1.5e-21	IPR019489	Clp ATPase, C-termina
AT5G55230	AT5G55230.1	587	HMMPfam	PF03999	MAP65_ASE1	38	566	2.90000000000003e-74	IPR007145	Microtubule-associated protein, MAP65/ASE1-typ
AT5G55230	AT5G55230.2	616	HMMPfam	PF03999	MAP65_ASE1	38	595	2.3e-75	IPR007145	Microtubule-associated protein, MAP65/ASE1-typ
AT5G55670	AT5G55670.1;AT5G55670.2	710;585	HMMPfam	PF00076	RRM_1	236	305	2.1e-11;2e-14	IPR000504	RNA recognition motif, RNP-1;Molecular Function: nucleic acid binding (GO:0003676
AT5G57870	AT5G57870.2	776	HMMPfam	PF02847	MA3	613	724	5.8e-26	IPR003891	Initiation factor eIF-4 gamma, MA
AT5G57870	AT5G57870.1	780	HMMPfam	PF02847	MA3	617	728	4.6e-23	IPR003891	Initiation factor eIF-4 gamma, MA
AT5G57870	AT5G57870.2	776	HMMPfam	PF02854	MIF4G	212	436	6.1e-54	IPR003890	MIF4G-like, type 3;Molecular Function: protein binding (GO:0005515), Biological Process: RNA metabolic process (GO:0016070
AT5G57870	AT5G57870.1	780	HMMPfam	PF02854	MIF4G	216	440	4.9e-51	IPR003890	MIF4G-like, type 3;Molecular Function: protein binding (GO:0005515), Biological Process: RNA metabolic process (GO:0016070
AT5G59950	AT5G59950.2	178	HMMPfam	PF00076	RRM_1	24	92	2.8e-10	IPR000504	RNA recognition motif, RNP-1;Molecular Function: nucleic acid binding (GO:0003676
AT5G59950	AT5G59950.3	242	HMMPfam	PF00076	RRM_1	88	156	5.40000000000001e-10	IPR000504	RNA recognition motif, RNP-1;Molecular Function: nucleic acid binding (GO:0003676
AT5G59950	AT5G59950.1;AT5G59950.4;AT5G59950.5	244;211;245	HMMPfam	PF00076	RRM_1	90	158	5.40000000000001e-10;4.1e-10;6.9e-13	IPR000504	RNA recognition motif, RNP-1;Molecular Function: nucleic acid binding (GO:0003676
AT5G60980	AT5G60980.1	459	HMMPfam	PF00076	RRM_1	295	352	2.7e-11	IPR000504	RNA recognition motif, RNP-1;Molecular Function: nucleic acid binding (GO:0003676
AT5G60980	AT5G60980.2	460	HMMPfam	PF00076	RRM_1	295	353	1.3e-08	IPR000504	RNA recognition motif, RNP-1;Molecular Function: nucleic acid binding (GO:0003676
AT5G60980	AT5G60980.2;AT5G60980.1	460;459	HMMPfam	PF02136	NTF2	15	131	4.80000000000001e-29;6e-32	IPR002075	Nuclear transport factor 2;Cellular Component: intracellular (GO:0005622), Biological Process: transport (GO:0006810
AT5G61780	AT5G61780.1	985	HMMPfam	PF00565	SNase	42	153	4.9e-10	IPR006021	Staphylococcal nuclease (SNase-like);Molecular Function: nucleic acid binding (GO:0003676), Molecular Function: hydrolase activity, acting on ester bonds (GO:0016788
AT5G61780	AT5G61780.1	985	HMMPfam	PF00565	SNase	274	367	2.1e-09	IPR006021	Staphylococcal nuclease (SNase-like);Molecular Function: nucleic acid binding (GO:0003676), Molecular Function: hydrolase activity, acting on ester bonds (GO:0016788
AT5G61780	AT5G61780.1	985	HMMPfam	PF00565	SNase	414	549	0.061	IPR006021	Staphylococcal nuclease (SNase-like);Molecular Function: nucleic acid binding (GO:0003676), Molecular Function: hydrolase activity, acting on ester bonds (GO:0016788
AT5G61780	AT5G61780.1	985	HMMPfam	PF00565	SNase	612	711	1.7e-08	IPR006021	Staphylococcal nuclease (SNase-like);Molecular Function: nucleic acid binding (GO:0003676), Molecular Function: hydrolase activity, acting on ester bonds (GO:0016788
AT5G61780	AT5G61780.1	985	HMMPfam	PF00565	SNase	853	965	0.00013	IPR006021	Staphylococcal nuclease (SNase-like);Molecular Function: nucleic acid binding (GO:0003676), Molecular Function: hydrolase activity, acting on ester bonds (GO:0016788
AT5G61780	AT5G61780.1	985	HMMPfam	PF00567	TUDOR	728	853	4.29999999999998e-27	IPR008191	Maternal tudor protei
AT5G62300	AT5G62300.1;AT5G62300.2	124	HMMPfam	PF00338	Ribosomal_S10	25	121	1.2e-27	IPR001848	Ribosomal protein S10;Molecular Function: structural constituent of ribosome (GO:0003735), Cellular Component: intracellular (GO:0005622), Cellular Component: ribosome (GO:0005840), Biological Process: translation (GO:0006412
AT5G62350	AT5G62350.1	202	HMMPfam	PF04043	PMEI	35	194	9.50000000000005e-36	IPR006501	Pectinesterase inhibitor;Molecular Function: enzyme inhibitor activity (GO:0004857), Molecular Function: pectinesterase activity (GO:0030599
AT5G63140	AT5G63140.1	389	HMMPfam	PF00149	Metallophos	47	306	2.2e-09	IPR004843	Metallophosphoesterase;Molecular Function: hydrolase activity (GO:0016787
AT5G63400	AT5G63400.2	190	HMMPfam	PF00406	ADK	39	159	6.00000000000001e-46	IPR000850	Adenylate kinase;Molecular Function: ATP binding (GO:0005524), Biological Process: nucleobase, nucleoside, nucleotide and nucleic acid metabolic process (GO:0006139), Molecular Function: nucleobase, nucleoside, nucleotide kinase activity (GO:0019205
AT5G63400	AT5G63400.1	246	HMMPfam	PF00406	ADK	39	223	4.4e-59	IPR000850	Adenylate kinase;Molecular Function: ATP binding (GO:0005524), Biological Process: nucleobase, nucleoside, nucleotide and nucleic acid metabolic process (GO:0006139), Molecular Function: nucleobase, nucleoside, nucleotide kinase activity (GO:0019205
AT5G63400	AT5G63400.2	190	HMMPfam	PF05191	ADK_lid	160	184	3.1e-06	IPR007862	Adenylate kinase, active site lid domain;Molecular Function: adenylate kinase activity (GO:0004017
AT5G63400	AT5G63400.1	246	HMMPfam	PF05191	ADK_lid	160	195	1.5e-16	IPR007862	Adenylate kinase, active site lid domain;Molecular Function: adenylate kinase activity (GO:0004017
AT5G63420	AT5G63420.1	911	HMMPfam	PF00753	Lactamase_B	119	279	6.60000000000002e-19	NULL	NUL
AT5G63420	AT5G63420.1	911	HMMPfam	PF07521	RMMBL	465	496	9.9e-07	IPR011108	RNA-metabolising metallo-beta-lactamas
AT5G63800	AT5G63800.1	718	HMMPfam	PF01301	Glyco_hydro_35	38	344	2.79999999999994e-109	IPR001944	Glycoside hydrolase, family 35;Molecular Function: hydrolase activity, hydrolyzing O-glycosyl compounds (GO:0004553), Biological Process: carbohydrate metabolic process (GO:0005975
AT5G64040	AT5G64040.2	181	HMMPfam	PF05479	PsaN	34	142	1.8e-57	IPR008796	Photosystem I reaction centre subunit N;Molecular Function: protein binding (GO:0005515), Cellular Component: photosystem I (GO:0009522), Biological Process: photosynthesis (GO:0015979), Cellular Component: thylakoid membrane (GO:0042651
AT5G64040	AT5G64040.1	171	HMMPfam	PF05479	PsaN	34	171	3.3e-79	IPR008796	Photosystem I reaction centre subunit N;Molecular Function: protein binding (GO:0005515), Cellular Component: photosystem I (GO:0009522), Biological Process: photosynthesis (GO:0015979), Cellular Component: thylakoid membrane (GO:0042651
AT5G64270	AT5G64270.1	1269	HMMPfam	PF02985	HEAT	650	678	5.4	IPR000357	HEA
AT5G64270	AT5G64270.1	1269	HMMPfam	PF08920	SF3b1	283	419	7.10000000000008e-39	IPR015016	Splicing factor 3B subunit
AT5G65410	AT5G65410.1	279	HMMPfam	PF04770	ZF-HD_dimer	72	125	6.50000000000001e-27	IPR006456	ZF-HD homeobox protein, Cys/His-rich dimerisation domai
AT5G66190	AT5G66190.2	262	HMMPfam	PF00175	NAD_binding_1	115	230	1.5e-28	IPR001433	Oxidoreductase FAD/NAD(P)-binding;Molecular Function: oxidoreductase activity (GO:0016491), Biological Process: oxidation reduction (GO:0055114
AT5G66190	AT5G66190.1	360	HMMPfam	PF00175	NAD_binding_1	213	328	3e-28	IPR001433	Oxidoreductase FAD/NAD(P)-binding;Molecular Function: oxidoreductase activity (GO:0016491), Biological Process: oxidation reduction (GO:0055114
AT5G66190	AT5G66190.2	262	HMMPfam	PF00970	FAD_binding_6	38	101	9.4e-05	IPR008333	Oxidoreductase, FAD-binding domain;Molecular Function: oxidoreductase activity (GO:0016491), Biological Process: oxidation reduction (GO:0055114
AT5G66190	AT5G66190.1	360	HMMPfam	PF00970	FAD_binding_6	136	199	0.00018	IPR008333	Oxidoreductase, FAD-binding domain;Molecular Function: oxidoreductase activity (GO:0016491), Biological Process: oxidation reduction (GO:0055114
AT5G66680	AT5G66680.1	437	HMMPfam	PF03345	DDOST_48kD	24	437	5.40000000000002e-129	IPR005013	Dolichyl-diphosphooligosaccharide-protein glycosyltransferase 48kDa subunit;Molecular Function: dolichyl-diphosphooligosaccharide-protein glycotransferase activity (GO:0004579), Cellular Component: endoplasmic reticulum membrane (GO:0005789), Biological Process: protein amino acid N-linked glycosylation via asparagine (GO:0018279
AT5G67380	AT5G67380.1	409	HMMPfam	PF00069	Pkinase	110	395	3.9e-60	IPR017442	Serine/threonine-protein kinase-like domain;Molecular Function: protein kinase activity (GO:0004672), Molecular Function: ATP binding (GO:0005524), Biological Process: protein amino acid phosphorylation (GO:0006468
AT5G67380	AT5G67380.2	376	HMMPfam	PF00069	Pkinase	113	362	1.80000000000002e-48	IPR017442	Serine/threonine-protein kinase-like domain;Molecular Function: protein kinase activity (GO:0004672), Molecular Function: ATP binding (GO:0005524), Biological Process: protein amino acid phosphorylation (GO:0006468
ATCG00120	ATCG00120.1	507	HMMPfam	PF00006	ATP-synt_ab	149	365	6.49999999999992e-73	IPR000194	ATPase, alpha/beta subunit, nucleotide-binding domain;Molecular Function: ATP binding (GO:0005524
ATCG00120	ATCG00120.1	507	HMMPfam	PF00306	ATP-synt_ab_C	377	459	5.09999999999998e-18	IPR000793	ATPase, F1/V1/A1 complex, alpha/beta subunit, C-terminal;Biological Process: ATP synthesis coupled proton transport (GO:0015986), Molecular Function: hydrolase activity, acting on acid anhydrides, catalyzing transmembrane movement of substances (GO:0016820), Cellular Component: proton-transporting two-sector ATPase complex, catalytic domain (GO:0033178
ATCG00120	ATCG00120.1	507	HMMPfam	PF02874	ATP-synt_ab_N	28	93	5.40000000000001e-15	IPR004100	ATPase, F1/V1/A1 complex, alpha/beta subunit, N-terminal;Biological Process: proton transport (GO:0015992), Cellular Component: proton-transporting two-sector ATPase complex (GO:0016469), Biological Process: ATP metabolic process (GO:0046034), Molecular Function: hydrogen ion transporting ATP synthase activity, rotational mechanism (GO:0046933), Molecular Function: proton-transporting ATPase acti…
ATCG00350	ATCG00350.1	750	HMMPfam	PF00223	PsaA_PsaB	32	744	0	IPR001280	Photosystem I, PsaA/PsaB;Cellular Component: photosystem I (GO:0009522), Cellular Component: thylakoid (GO:0009579), Biological Process: photosynthesis (GO:0015979), Cellular Component: integral to membrane (GO:0016021
ATCG00490	ATCG00490.1	479	HMMPfam	PF00016	RuBisCO_large	154	462	0	IPR000685	Ribulose bisphosphate carboxylase, large subunit, C-terminal;Molecular Function: magnesium ion binding (GO:0000287), Cellular Component: plastid (GO:0009536), Biological Process: carbon fixation (GO:0015977), Molecular Function: ribulose-bisphosphate carboxylase activity (GO:0016984
ATCG00490	ATCG00490.1	479	HMMPfam	PF02788	RuBisCO_large_N	21	146	7.29999999999998e-61	IPR017444	Ribulose bisphosphate carboxylase, large subunit, N-terminal;Molecular Function: magnesium ion binding (GO:0000287), Biological Process: carbon fixation (GO:0015977), Molecular Function: ribulose-bisphosphate carboxylase activity (GO:0016984

## Sheet: 6xHis-Myc-Csy4
AGI	Protein name	Protein length	Application name	Domain id	Domain description	Start of domain match	End of domain match	E-value	INTERPRO id	INTERPRO domain name
AT1G01080	AT1G01080.1	293	HMMPfam	PF00076	RRM_1	110	180	2.7e-13	IPR000504	RNA recognition motif, RNP-1;Molecular Function: nucleic acid binding (GO:0003676
AT1G01080	AT1G01080.2	294	HMMPfam	PF00076	RRM_1	110	181	2.2e-12	IPR000504	RNA recognition motif, RNP-1;Molecular Function: nucleic acid binding (GO:0003676
AT1G01080	AT1G01080.1	293	HMMPfam	PF00076	RRM_1	214	282	1.3e-15	IPR000504	RNA recognition motif, RNP-1;Molecular Function: nucleic acid binding (GO:0003676
AT1G01080	AT1G01080.2	294	HMMPfam	PF00076	RRM_1	215	283	1.4e-15	IPR000504	RNA recognition motif, RNP-1;Molecular Function: nucleic acid binding (GO:0003676
AT1G02150	AT1G02150.1	524	HMMPfam	PF01535	PPR	171	199	1.4	IPR002885	Pentatricopeptide repea
AT1G02150	AT1G02150.1	524	HMMPfam	PF01535	PPR	207	235	110	IPR002885	Pentatricopeptide repea
AT1G02150	AT1G02150.1	524	HMMPfam	PF01535	PPR	240	267	0.96	IPR002885	Pentatricopeptide repea
AT1G02150	AT1G02150.1	524	HMMPfam	PF01535	PPR	277	300	180	IPR002885	Pentatricopeptide repea
AT1G02150	AT1G02150.1	524	HMMPfam	PF01535	PPR	348	370	41	IPR002885	Pentatricopeptide repea
AT1G02150	AT1G02150.1	524	HMMPfam	PF01535	PPR	384	410	0.04	IPR002885	Pentatricopeptide repea
AT1G02280	AT1G02280.1;AT1G02280.2	297	HMMPfam	PF04548	AIG1	38	200	3.39999999999999e-30	IPR006703	AIG1;Molecular Function: GTP binding (GO:0005525
AT1G02840	AT1G02840.2;AT1G02840.1;AT1G02840.3	285;303	HMMPfam	PF00076	RRM_1	9	76	7.5e-16;1.1e-18	IPR000504	RNA recognition motif, RNP-1;Molecular Function: nucleic acid binding (GO:0003676
AT1G02840	AT1G02840.2;AT1G02840.1;AT1G02840.3	285;303	HMMPfam	PF00076	RRM_1	121	183	3.5e-06;5e-09	IPR000504	RNA recognition motif, RNP-1;Molecular Function: nucleic acid binding (GO:0003676
AT1G04170	AT1G04170.1	465	HMMPfam	PF00009	GTP_EFTU	32	237	1.80000000000002e-38	IPR000795	Protein synthesis factor, GTP-binding;Molecular Function: GTPase activity (GO:0003924), Molecular Function: GTP binding (GO:0005525
AT1G04170	AT1G04170.1	465	HMMPfam	PF03144	GTP_EFTU_D2	269	351	1.5e-07	IPR004161	Translation elongation factor EFTu/EF1A, domain 2;Molecular Function: GTP binding (GO:0005525
AT1G04170	AT1G04170.1	465	HMMPfam	PF09173	eIF2_C	361	452	2.89999999999999e-33	IPR015256	Initiation factor eIF2 gamma, C-termina
AT1G04510	AT1G04510.2;AT1G04510.1	523	HMMPfam	PF00400	WD40	255	291	4.1e-07;5.2e-10	IPR019781	WD40 repeat, subgrou
AT1G04510	AT1G04510.2;AT1G04510.1	523	HMMPfam	PF00400	WD40	302	337	0.076;9.6e-05	IPR019781	WD40 repeat, subgrou
AT1G04510	AT1G04510.2;AT1G04510.1	523	HMMPfam	PF00400	WD40	358	382	78;0.098	IPR019781	WD40 repeat, subgrou
AT1G04510	AT1G04510.2;AT1G04510.1	523	HMMPfam	PF00400	WD40	389	423	4e-04;5e-07	IPR019781	WD40 repeat, subgrou
AT1G04510	AT1G04510.2;AT1G04510.1	523	HMMPfam	PF00400	WD40	481	508	24;0.027	IPR019781	WD40 repeat, subgrou
AT1G04510	AT1G04510.2;AT1G04510.1	523	HMMPfam	PF08606	Prp19	66	132	4.40000000000001e-28;5.5e-31	IPR013915	Pre-mRNA-splicing factor 1
AT1G04980	AT1G04980.1	447	HMMPfam	PF00085	Thioredoxin	34	135	1.6e-30	IPR013766	Thioredoxin domain;Biological Process: cell redox homeostasis (GO:0045454
AT1G04980	AT1G04980.1	447	HMMPfam	PF00085	Thioredoxin	170	269	7.5e-30	IPR013766	Thioredoxin domain;Biological Process: cell redox homeostasis (GO:0045454
AT1G06220	AT1G06220.2;AT1G06220.1	987	HMMPfam	PF00009	GTP_EFTU	138	332	7.59999999999998e-43	IPR000795	Protein synthesis factor, GTP-binding;Molecular Function: GTPase activity (GO:0003924), Molecular Function: GTP binding (GO:0005525
AT1G06220	AT1G06220.2;AT1G06220.1	987	HMMPfam	PF00679	EFG_C	840	928	9.7e-19	IPR000640	Translation elongation factor EFG/EF2, C-terminal;Molecular Function: GTP binding (GO:0005525
AT1G06220	AT1G06220.2;AT1G06220.1	987	HMMPfam	PF03144	GTP_EFTU_D2	506	580	6.70000000000001e-08	IPR004161	Translation elongation factor EFTu/EF1A, domain 2;Molecular Function: GTP binding (GO:0005525
AT1G06220	AT1G06220.2;AT1G06220.1	987	HMMPfam	PF03764	EFG_IV	722	837	6.70000000000001e-22	IPR005517	Translation elongation factor EFG/EF2, domain IV;Molecular Function: GTP binding (GO:0005525
AT1G06760	AT1G06760.1	274	HMMPfam	PF00538	Linker_histone	61	129	1.9e-20	IPR005818	Histone H1/H5;Cellular Component: nucleosome (GO:0000786), Molecular Function: DNA binding (GO:0003677), Cellular Component: nucleus (GO:0005634), Biological Process: nucleosome assembly (GO:0006334
AT1G07320	AT1G07320.2;AT1G07320.3;AT1G07320.4;AT1G07320.1	280;278;282	HMMPfam	PF00573	Ribosomal_L4	77	259	2.29999999999998e-50;2.19999999999997e-50;2.9e-53	IPR002136	Ribosomal protein L4/L1e;Molecular Function: structural constituent of ribosome (GO:0003735), Cellular Component: intracellular (GO:0005622), Cellular Component: ribosome (GO:0005840), Biological Process: translation (GO:0006412
AT1G08450	AT1G08450.2	370	HMMPfam	PF00262	Calreticulin	31	139	3e-29	IPR001580	Calreticulin/calnexin;Molecular Function: calcium ion binding (GO:0005509
AT1G08450	AT1G08450.3	399	HMMPfam	PF00262	Calreticulin	31	280	4.6e-85	IPR001580	Calreticulin/calnexin;Molecular Function: calcium ion binding (GO:0005509
AT1G08450	AT1G08450.1	424	HMMPfam	PF00262	Calreticulin	31	342	2.4e-108	IPR001580	Calreticulin/calnexin;Molecular Function: calcium ion binding (GO:0005509
AT1G08450	AT1G08450.2	370	HMMPfam	PF00262	Calreticulin	135	288	8.3e-49	IPR001580	Calreticulin/calnexin;Molecular Function: calcium ion binding (GO:0005509
AT1G08450	AT1G08450.3	399	HMMPfam	PF00262	Calreticulin	282	317	3.6e-05	IPR001580	Calreticulin/calnexin;Molecular Function: calcium ion binding (GO:0005509
AT1G09340	AT1G09340.1	378	HMMPfam	PF01370	Epimerase	56	273	1.6e-10	IPR001509	NAD-dependent epimerase/dehydratase;Molecular Function: catalytic activity (GO:0003824), Biological Process: cellular metabolic process (GO:0044237), Molecular Function: coenzyme binding (GO:0050662
AT1G10580	AT1G10580.1	573	HMMPfam	PF00400	WD40	274	311	6.59999999999999e-07	IPR019781	WD40 repeat, subgrou
AT1G10580	AT1G10580.1	573	HMMPfam	PF00400	WD40	316	354	2.2e-06	IPR019781	WD40 repeat, subgrou
AT1G10580	AT1G10580.1	573	HMMPfam	PF00400	WD40	402	440	0.00078	IPR019781	WD40 repeat, subgrou
AT1G10580	AT1G10580.1	573	HMMPfam	PF00400	WD40	449	483	280	IPR019781	WD40 repeat, subgrou
AT1G10580	AT1G10580.1	573	HMMPfam	PF00400	WD40	507	530	1200	IPR019781	WD40 repeat, subgrou
AT1G10580	AT1G10580.1	573	HMMPfam	PF00400	WD40	535	573	0.037	IPR019781	WD40 repeat, subgrou
AT1G10840	AT1G10840.1	337	HMMPfam	PF01398	Mov34	22	127	3.7e-14	IPR000555	Mov34/MPN/PAD-
AT1G12370	AT1G12370.2;AT1G12370.1	496;490	HMMPfam	PF00875	DNA_photolyase	30	191	8.70000000000003e-29;8.49999999999995e-29	IPR006050	DNA photolyase, N-terminal;Molecular Function: DNA photolyase activity (GO:0003913), Biological Process: DNA repair (GO:0006281
AT1G12370	AT1G12370.1	490	HMMPfam	PF03441	FAD_binding_7	233	458	1.5e-25	IPR005101	DNA photolyase, FAD-binding/Cryptochrome, C-terminal;Molecular Function: DNA photolyase activity (GO:0003913), Biological Process: DNA repair (GO:0006281
AT1G12370	AT1G12370.2	496	HMMPfam	PF03441	FAD_binding_7	233	464	1.8e-32	IPR005101	DNA photolyase, FAD-binding/Cryptochrome, C-terminal;Molecular Function: DNA photolyase activity (GO:0003913), Biological Process: DNA repair (GO:0006281
AT1G14410	AT1G14410.1	263	HMMPfam	PF08536	Whirly	86	224	4.2e-64	IPR013742	Plant transcription facto
AT1G14650	AT1G14650.1;AT1G14650.2	785	HMMPfam	PF00240	ubiquitin	725	780	6.59999999999999e-06	IPR000626	Ubiquiti
AT1G14650	AT1G14650.1;AT1G14650.2	785	HMMPfam	PF01805	Surp	72	116	2.4e-16	IPR000061	SWAP/Surp;Molecular Function: RNA binding (GO:0003723), Biological Process: RNA processing (GO:0006396
AT1G14650	AT1G14650.1;AT1G14650.2	785	HMMPfam	PF01805	Surp	194	237	2.6e-15	IPR000061	SWAP/Surp;Molecular Function: RNA binding (GO:0003723), Biological Process: RNA processing (GO:0006396
AT1G14650	AT1G14650.1;AT1G14650.2	785	HMMPfam	PF12230	PRP21_like_P	249	470	3.79999999999991e-70	IPR022030	Pre-mRNA splicing factor PRP21 like protei
AT1G16300	AT1G16300.1	420	HMMPfam	PF00044	Gp_dh_N	86	234	8.89999999999994e-56	IPR020828	Glyceraldehyde 3-phosphate dehydrogenase, NAD(P) binding domai
AT1G16300	AT1G16300.1	420	HMMPfam	PF02800	Gp_dh_C	239	396	2.09999999999996e-69	IPR020829	Glyceraldehyde 3-phosphate dehydrogenase, catalytic domai
AT1G16720	AT1G16720.1	598	HMMPfam	PF05368	NmrA	165	236	3.7e-06	IPR008030	NmrA-lik
AT1G16720	AT1G16720.1	598	HMMPfam	PF08547	CIA30	309	413	2.9e-06	IPR013857	NADH:ubiquinone oxidoreductase intermediate-associated protein 3
AT1G17220	AT1G17220.1	1026	HMMPfam	PF00009	GTP_EFTU	502	665	2.5e-39	IPR000795	Protein synthesis factor, GTP-binding;Molecular Function: GTPase activity (GO:0003924), Molecular Function: GTP binding (GO:0005525
AT1G17220	AT1G17220.1	1026	HMMPfam	PF03144	GTP_EFTU_D2	693	754	3.8e-10	IPR004161	Translation elongation factor EFTu/EF1A, domain 2;Molecular Function: GTP binding (GO:0005525
AT1G17220	AT1G17220.1	1026	HMMPfam	PF04760	IF2_N	420	470	3.5e-05	IPR006847	Translation initiation factor IF-2, N-terminal;Molecular Function: translation initiation factor activity (GO:0003743), Biological Process: translational initiation (GO:0006413
AT1G17220	AT1G17220.1	1026	HMMPfam	PF11987	IF-2	802	901	1.4e-32	NULL	NUL
AT1G18450	AT1G18450.1	441	HMMPfam	PF00022	Actin	4	440	0	IPR004000	Actin/actin-like;Molecular Function: protein binding (GO:0005515
AT1G18610	AT1G18610.1	556	HMMPfam	PF01344	Kelch_1	77	116	4.40000000000001e-06	IPR006652	Kelch repeat type
AT1G18610	AT1G18610.1	556	HMMPfam	PF01344	Kelch_1	127	173	0.033	IPR006652	Kelch repeat type
AT1G18610	AT1G18610.1	556	HMMPfam	PF01344	Kelch_1	234	276	0.1	IPR006652	Kelch repeat type
AT1G18610	AT1G18610.1	556	HMMPfam	PF07646	Kelch_2	184	228	2.3e-05	IPR011498	Kelch repeat type 2;Molecular Function: protein binding (GO:0005515
AT1G20190	AT1G20190.1	252	HMMPfam	PF01357	Pollen_allerg_1	160	237	3.5e-23	IPR007117	Pollen allergen/expansin, C-termina
AT1G20190	AT1G20190.1	252	HMMPfam	PF03330	DPBB_1	61	148	7.1e-22	IPR005132	Rare lipoprotein
AT1G20580	AT1G20580.1	131	HMMPfam	PF01423	LSM	11	74	1e-12	IPR001163	Like-Sm ribonucleoprotein (LSM) domai
AT1G20960	AT1G20960.1;AT1G20960.2	2171	HMMPfam	PF00270	DEAD	507	683	3.5e-23	IPR011545	DNA/RNA helicase, DEAD/DEAH box type, N-terminal;Molecular Function: nucleic acid binding (GO:0003676), Molecular Function: ATP binding (GO:0005524), Molecular Function: ATP-dependent helicase activity (GO:0008026
AT1G20960	AT1G20960.1;AT1G20960.2	2171	HMMPfam	PF00270	DEAD	1353	1520	3.60000000000001e-21	IPR011545	DNA/RNA helicase, DEAD/DEAH box type, N-terminal;Molecular Function: nucleic acid binding (GO:0003676), Molecular Function: ATP binding (GO:0005524), Molecular Function: ATP-dependent helicase activity (GO:0008026
AT1G20960	AT1G20960.1;AT1G20960.2	2171	HMMPfam	PF00271	Helicase_C	805	883	3.5e-06	IPR001650	DNA/RNA helicase, C-terminal;Molecular Function: nucleic acid binding (GO:0003676), Molecular Function: helicase activity (GO:0004386), Molecular Function: ATP binding (GO:0005524
AT1G20960	AT1G20960.1;AT1G20960.2	2171	HMMPfam	PF02889	Sec63	1006	1310	8.39999999999977e-103	IPR004179	Sec63 domai
AT1G20960	AT1G20960.1;AT1G20960.2	2171	HMMPfam	PF02889	Sec63	1839	2158	7.90000000000016e-98	IPR004179	Sec63 domai
AT1G23410	AT1G23410.1	156	HMMPfam	PF00240	ubiquitin	6	74	1.9e-34	IPR000626	Ubiquiti
AT1G23410	AT1G23410.1	156	HMMPfam	PF01599	Ribosomal_S27	101	147	4.2e-25	IPR002906	Ribosomal protein S27a;Molecular Function: structural constituent of ribosome (GO:0003735), Cellular Component: intracellular (GO:0005622), Cellular Component: ribosome (GO:0005840), Biological Process: translation (GO:0006412
AT1G28290	AT1G28290.2	315	HMMPfam	PF01190	Pollen_Ole_e_I	188	272	1.1e-18	IPR006041	Pollen Ole e 1 allergen/extensi
AT1G28290	AT1G28290.1	359	HMMPfam	PF01190	Pollen_Ole_e_I	232	316	1.1e-15	IPR006041	Pollen Ole e 1 allergen/extensi
AT1G29050	AT1G29050.1	380	HMMPfam	PF03005	DUF231	223	378	4.80000000000003e-52	IPR004253	Protein of unknown function DUF231, plan
AT1G31970	AT1G31970.1	537	HMMPfam	PF00270	DEAD	139	313	6.29999999999997e-45	IPR011545	DNA/RNA helicase, DEAD/DEAH box type, N-terminal;Molecular Function: nucleic acid binding (GO:0003676), Molecular Function: ATP binding (GO:0005524), Molecular Function: ATP-dependent helicase activity (GO:0008026
AT1G31970	AT1G31970.1	537	HMMPfam	PF00271	Helicase_C	385	461	4.00000000000001e-24	IPR001650	DNA/RNA helicase, C-terminal;Molecular Function: nucleic acid binding (GO:0003676), Molecular Function: helicase activity (GO:0004386), Molecular Function: ATP binding (GO:0005524
AT1G33330	AT1G33330.1	257	HMMPfam	PF00472	RF-1	95	161	3.2e-17	IPR000352	Class I peptide chain release factor;Molecular Function: translation release factor activity (GO:0003747), Biological Process: translational termination (GO:0006415
AT1G33811	AT1G33811.1	370	HMMPfam	PF00657	Lipase_GDSL	35	350	2.70000000000002e-42	IPR001087	Lipase, GDSL;Biological Process: lipid metabolic process (GO:0006629), Molecular Function: hydrolase activity, acting on ester bonds (GO:0016788
AT1G35140	AT1G35140.1	309	HMMPfam	PF04674	Phi_1	33	308	5.00000000000001e-126	IPR006766	Phosphate-induced protein
AT1G43170	AT1G43170.4	306	HMMPfam	PF00297	Ribosomal_L3	1	260	5.99999999999995e-103	IPR000597	Ribosomal protein L3;Molecular Function: structural constituent of ribosome (GO:0003735), Cellular Component: intracellular (GO:0005622), Cellular Component: ribosome (GO:0005840), Biological Process: translation (GO:0006412
AT1G43170	AT1G43170.2;AT1G43170.1;AT1G43170.3;AT1G43170.6;AT1G43170.5;AT1G43170.9;AT1G43170.7;AT1G43170.8	389	HMMPfam	PF00297	Ribosomal_L3	50	343	2e-124	IPR000597	Ribosomal protein L3;Molecular Function: structural constituent of ribosome (GO:0003735), Cellular Component: intracellular (GO:0005622), Cellular Component: ribosome (GO:0005840), Biological Process: translation (GO:0006412
AT1G48160	AT1G48160.1	145	HMMPfam	PF01922	SRP19	12	107	1.69999999999999e-27	IPR002778	Signal recognition particle, SRP19 subunit;Biological Process: SRP-dependent cotranslational protein targeting to membrane (GO:0006614), Molecular Function: 7S RNA binding (GO:0008312), Cellular Component: signal recognition particle (GO:0048500
AT1G48350	AT1G48350.1	170	HMMPfam	PF00861	Ribosomal_L18p	55	170	1.3e-36	IPR005484	Ribosomal protein L18/L5;Molecular Function: structural constituent of ribosome (GO:0003735), Cellular Component: intracellular (GO:0005622), Cellular Component: ribosome (GO:0005840), Biological Process: translation (GO:0006412
AT1G48410	AT1G48410.1	1048	HMMPfam	PF02170	PAZ	388	523	1.5e-34	IPR003100	Argonaute/Dicer protein, PA
AT1G48410	AT1G48410.2;AT1G48410.3	1050	HMMPfam	PF02170	PAZ	390	525	1.2e-31	IPR003100	Argonaute/Dicer protein, PA
AT1G48410	AT1G48410.1	1048	HMMPfam	PF02171	Piwi	677	996	3.5e-112	IPR003165	Stem cell self-renewal protein Piw
AT1G48410	AT1G48410.2;AT1G48410.3	1050	HMMPfam	PF02171	Piwi	679	998	2.79999999999994e-109	IPR003165	Stem cell self-renewal protein Piw
AT1G48410	AT1G48410.1	1048	HMMPfam	PF08699	DUF1785	334	386	9.5e-24	IPR014811	Domain of unknown function DUF178
AT1G48410	AT1G48410.2;AT1G48410.3	1050	HMMPfam	PF08699	DUF1785	336	388	7.5e-21	IPR014811	Domain of unknown function DUF178
AT1G48620	AT1G48620.1	479	HMMPfam	PF00538	Linker_histone	74	142	1.8e-14	IPR005818	Histone H1/H5;Cellular Component: nucleosome (GO:0000786), Molecular Function: DNA binding (GO:0003677), Cellular Component: nucleus (GO:0005634), Biological Process: nucleosome assembly (GO:0006334
AT1G48920	AT1G48920.1	557	HMMPfam	PF00076	RRM_1	300	368	2.8e-11	IPR000504	RNA recognition motif, RNP-1;Molecular Function: nucleic acid binding (GO:0003676
AT1G48920	AT1G48920.1	557	HMMPfam	PF00076	RRM_1	403	470	6.70000000000001e-07	IPR000504	RNA recognition motif, RNP-1;Molecular Function: nucleic acid binding (GO:0003676
AT1G49670	AT1G49670.1;AT1G49670.2	629;652	HMMPfam	PF00106	adh_short	9	183	8.49999999999995e-21;1.2e-23	IPR002198	Short-chain dehydrogenase/reductase SDR;Biological Process: metabolic process (GO:0008152), Molecular Function: oxidoreductase activity (GO:0016491
AT1G49670	AT1G49670.1	629	HMMPfam	PF00107	ADH_zinc_N	439	573	1e-27	IPR013149	Alcohol dehydrogenase, C-terminal;Molecular Function: zinc ion binding (GO:0008270), Molecular Function: oxidoreductase activity (GO:0016491), Biological Process: oxidation reduction (GO:0055114
AT1G49670	AT1G49670.2	652	HMMPfam	PF00107	ADH_zinc_N	462	596	1.4e-30	IPR013149	Alcohol dehydrogenase, C-terminal;Molecular Function: zinc ion binding (GO:0008270), Molecular Function: oxidoreductase activity (GO:0016491), Biological Process: oxidation reduction (GO:0055114
AT1G49670	AT1G49670.1;AT1G49670.2	629;652	HMMPfam	PF08240	ADH_N	316	379	1e-06;1.4e-09	IPR013154	Alcohol dehydrogenase GroES-like;Molecular Function: oxidoreductase activity (GO:0016491
AT1G49750	AT1G49750.1	494	HMMPfam	PF00560	LRR_1	224	245	40	IPR001611	Leucine-rich repeat;Molecular Function: protein binding (GO:0005515
AT1G49750	AT1G49750.1	494	HMMPfam	PF00560	LRR_1	247	267	280	IPR001611	Leucine-rich repeat;Molecular Function: protein binding (GO:0005515
AT1G49760	AT1G49760.1;AT1G49760.2	671	HMMPfam	PF00076	RRM_1	47	117	1.9e-14	IPR000504	RNA recognition motif, RNP-1;Molecular Function: nucleic acid binding (GO:0003676
AT1G49760	AT1G49760.1;AT1G49760.2	671	HMMPfam	PF00076	RRM_1	135	203	5.40000000000002e-17	IPR000504	RNA recognition motif, RNP-1;Molecular Function: nucleic acid binding (GO:0003676
AT1G49760	AT1G49760.1;AT1G49760.2	671	HMMPfam	PF00076	RRM_1	226	294	3.2e-20	IPR000504	RNA recognition motif, RNP-1;Molecular Function: nucleic acid binding (GO:0003676
AT1G49760	AT1G49760.1;AT1G49760.2	671	HMMPfam	PF00076	RRM_1	329	396	2.7e-18	IPR000504	RNA recognition motif, RNP-1;Molecular Function: nucleic acid binding (GO:0003676
AT1G49760	AT1G49760.1;AT1G49760.2	671	HMMPfam	PF00658	PABP	577	645	2.4e-26	IPR002004	Polyadenylate-binding protein/Hyperplastic disc protein;Molecular Function: RNA binding (GO:0003723
AT1G51510	AT1G51510.1	202	HMMPfam	PF00076	RRM_1	97	163	1.7e-15	IPR000504	RNA recognition motif, RNP-1;Molecular Function: nucleic acid binding (GO:0003676
AT1G55210	AT1G55210.1;AT1G55210.2	187	HMMPfam	PF03018	Dirigent	43	186	1.40000000000001e-47	IPR004265	Plant disease resistance response protei
AT1G62390	AT1G62390.1	751	HMMPfam	PF00564	PB1	290	381	1.4e-20	IPR000270	Octicosapeptide/Phox/Bem1
AT1G63680	AT1G63680.1	772	HMMPfam	PF01225	Mur_ligase	264	337	2.2e-11	IPR000713	Mur ligase, N-terminal;Molecular Function: ATP binding (GO:0005524), Biological Process: biosynthetic process (GO:0009058
AT1G63680	AT1G63680.1	772	HMMPfam	PF02875	Mur_ligase_C	577	660	9.3e-15	IPR004101	Mur ligase, C-terminal;Molecular Function: ATP binding (GO:0005524), Biological Process: biosynthetic process (GO:0009058), Molecular Function: ligase activity (GO:0016874
AT1G63680	AT1G63680.1	772	HMMPfam	PF08245	Mur_ligase_M	349	556	2.2e-35	IPR013221	Mur ligase, central;Molecular Function: ATP binding (GO:0005524), Biological Process: biosynthetic process (GO:0009058
AT1G65260	AT1G65260.1	330	HMMPfam	PF04012	PspA_IM30	73	289	7.20000000000002e-52	IPR007157	PspA/IM3
AT1G65590	AT1G65590.1	535	HMMPfam	PF00728	Glyco_hydro_20	182	486	2.50000000000001e-88	IPR015883	Glycoside hydrolase, family 20, catalytic core;Molecular Function: hydrolase activity, hydrolyzing O-glycosyl compounds (GO:0004553
AT1G65590	AT1G65590.1	535	HMMPfam	PF02838	Glyco_hydro_20b	104	180	4.9e-08	IPR015882	Beta-N-acetylhexosaminidase, subunit a/b;Molecular Function: beta-N-acetylhexosaminidase activity (GO:0004563), Biological Process: carbohydrate metabolic process (GO:0005975
AT1G65870	AT1G65870.1	189	HMMPfam	PF03018	Dirigent	43	189	6.19999999999994e-54	IPR004265	Plant disease resistance response protei
AT1G66520	AT1G66520.1	355	HMMPfam	PF00551	Formyl_trans_N	29	190	1.2e-30	IPR002376	Formyl transferase, N-terminal;Biological Process: biosynthetic process (GO:0009058), Molecular Function: hydroxymethyl-, formyl- and related transferase activity (GO:0016742
AT1G66520	AT1G66520.1	355	HMMPfam	PF02911	Formyl_trans_C	238	347	2.3e-14	IPR005793	Formyl transferase, C-terminal;Biological Process: biosynthetic process (GO:0009058), Molecular Function: hydroxymethyl-, formyl- and related transferase activity (GO:0016742
AT1G67680	AT1G67680.1	664	HMMPfam	PF08492	SRP72	550	609	2.1e-14	IPR013699	Signal recognition particle, SRP72 subunit, RNA-binding;Biological Process: SRP-dependent cotranslational protein targeting to membrane (GO:0006614), Molecular Function: 7S RNA binding (GO:0008312), Cellular Component: signal recognition particle (GO:0048500
AT1G69200	AT1G69200.1	616	HMMPfam	PF00294	PfkB	246	532	1.5e-28	IPR011611	Carbohydrate/purine kinas
AT1G69530	AT1G69530.5	245	HMMPfam	PF01357	Pollen_allerg_1	158	220	1.2e-17	IPR007117	Pollen allergen/expansin, C-termina
AT1G69530	AT1G69530.3;AT1G69530.4;AT1G69530.1;AT1G69530.2	275;274;250	HMMPfam	PF01357	Pollen_allerg_1	158	234	2.5e-25;2.4e-25;2.6e-28	IPR007117	Pollen allergen/expansin, C-termina
AT1G69530	AT1G69530.3;AT1G69530.4;AT1G69530.1;AT1G69530.5;AT1G69530.2	275;274;250;245	HMMPfam	PF03330	DPBB_1	62	147	5.69999999999998e-24;5.59999999999999e-24;5.9e-27;5.7e-27	IPR005132	Rare lipoprotein
AT1G70770	AT1G70770.1;AT1G70770.2	610	HMMPfam	PF10151	DUF2359	307	574	1e-13	IPR019308	Protein of unknown function DUF2359, transmembran
AT1G71695	AT1G71695.1	358	HMMPfam	PF00141	peroxidase	61	301	1.99999999999999e-68	IPR002016	Haem peroxidase, plant/fungal/bacterial;Molecular Function: peroxidase activity (GO:0004601), Biological Process: response to oxidative stress (GO:0006979), Molecular Function: heme binding (GO:0020037), Biological Process: oxidation reduction (GO:0055114
AT1G72610	AT1G72610.1	208	HMMPfam	PF00190	Cupin_1	56	196	4.4e-26	IPR006045	Cupin 1;Molecular Function: nutrient reservoir activity (GO:0045735
AT1G72710	AT1G72710.1	465	HMMPfam	PF00069	Pkinase	9	243	4.10000000000004e-34	IPR017442	Serine/threonine-protein kinase-like domain;Molecular Function: protein kinase activity (GO:0004672), Molecular Function: ATP binding (GO:0005524), Biological Process: protein amino acid phosphorylation (GO:0006468
AT1G72970	AT1G72970.1;AT1G72970.2	594;567	HMMPfam	PF00732	GMC_oxred_N	63	335	2.2e-29;2e-29	IPR000172	Glucose-methanol-choline oxidoreductase, N-terminal;Molecular Function: oxidoreductase activity, acting on CH-OH group of donors (GO:0016614), Molecular Function: FAD binding (GO:0050660
AT1G72970	AT1G72970.2	567	HMMPfam	PF05199	GMC_oxred_C	431	550	1.9e-21	IPR007867	Glucose-methanol-choline oxidoreductase, C-terminal;Molecular Function: oxidoreductase activity, acting on CH-OH group of donors (GO:0016614
AT1G72970	AT1G72970.1	594	HMMPfam	PF05199	GMC_oxred_C	431	577	8.8e-28	IPR007867	Glucose-methanol-choline oxidoreductase, C-terminal;Molecular Function: oxidoreductase activity, acting on CH-OH group of donors (GO:0016614
AT1G73530	AT1G73530.1	181	HMMPfam	PF00076	RRM_1	79	148	3.90000000000001e-17	IPR000504	RNA recognition motif, RNP-1;Molecular Function: nucleic acid binding (GO:0003676
AT1G73720	AT1G73720.1	511	HMMPfam	PF00400	WD40	217	241	0.011	IPR019781	WD40 repeat, subgrou
AT1G73720	AT1G73720.1	511	HMMPfam	PF00400	WD40	261	290	2.3e-06	IPR019781	WD40 repeat, subgrou
AT1G73720	AT1G73720.1	511	HMMPfam	PF00400	WD40	295	331	0.00058	IPR019781	WD40 repeat, subgrou
AT1G73720	AT1G73720.1	511	HMMPfam	PF00400	WD40	337	375	2.8e-07	IPR019781	WD40 repeat, subgrou
AT1G73720	AT1G73720.1	511	HMMPfam	PF00400	WD40	481	510	0.34	IPR019781	WD40 repeat, subgrou
AT1G74000	AT1G74000.1	329	HMMPfam	PF03088	Str_synth	148	235	9e-32	IPR018119	Strictosidine synthase, conserved region;Biological Process: biosynthetic process (GO:0009058), Molecular Function: strictosidine synthase activity (GO:0016844
AT1G74850	AT1G74850.1	862	HMMPfam	PF01535	PPR	143	172	0.00022	IPR002885	Pentatricopeptide repea
AT1G74850	AT1G74850.1	862	HMMPfam	PF01535	PPR	177	206	0.00013	IPR002885	Pentatricopeptide repea
AT1G74850	AT1G74850.1	862	HMMPfam	PF01535	PPR	213	243	40	IPR002885	Pentatricopeptide repea
AT1G74850	AT1G74850.1	862	HMMPfam	PF01535	PPR	248	278	0.00890000000000001	IPR002885	Pentatricopeptide repea
AT1G74850	AT1G74850.1	862	HMMPfam	PF01535	PPR	284	312	160	IPR002885	Pentatricopeptide repea
AT1G74850	AT1G74850.1	862	HMMPfam	PF01535	PPR	319	348	0.00027	IPR002885	Pentatricopeptide repea
AT1G74850	AT1G74850.1	862	HMMPfam	PF01535	PPR	354	382	0.062	IPR002885	Pentatricopeptide repea
AT1G74850	AT1G74850.1	862	HMMPfam	PF01535	PPR	389	418	0.067	IPR002885	Pentatricopeptide repea
AT1G74850	AT1G74850.1	862	HMMPfam	PF01535	PPR	424	452	160	IPR002885	Pentatricopeptide repea
AT1G74850	AT1G74850.1	862	HMMPfam	PF01535	PPR	459	487	440	IPR002885	Pentatricopeptide repea
AT1G74850	AT1G74850.1	862	HMMPfam	PF01535	PPR	494	523	350	IPR002885	Pentatricopeptide repea
AT1G74850	AT1G74850.1	862	HMMPfam	PF01535	PPR	529	558	25	IPR002885	Pentatricopeptide repea
AT1G74850	AT1G74850.1	862	HMMPfam	PF01535	PPR	567	592	270	IPR002885	Pentatricopeptide repea
AT1G74850	AT1G74850.1	862	HMMPfam	PF01535	PPR	599	627	10	IPR002885	Pentatricopeptide repea
AT1G75350	AT1G75350.1	144	HMMPfam	PF01197	Ribosomal_L31	50	114	1.5e-13	IPR002150	Ribosomal protein L31;Molecular Function: structural constituent of ribosome (GO:0003735), Cellular Component: intracellular (GO:0005622), Cellular Component: ribosome (GO:0005840), Biological Process: translation (GO:0006412
AT1G76110	AT1G76110.1	338	HMMPfam	PF00505	HMG_box	255	322	8.40000000000001e-08	IPR000910	High mobility group, HMG1/HMG2;Molecular Function: DNA binding (GO:0003677), Cellular Component: nucleus (GO:0005634
AT1G76110	AT1G76110.1	338	HMMPfam	PF01388	ARID	40	125	6.50000000000001e-16	IPR001606	ARID/BRIGHT DNA-binding domain;Molecular Function: DNA binding (GO:0003677), Cellular Component: intracellular (GO:0005622
AT1G76730	AT1G76730.1	354	HMMPfam	PF01812	5-FTHF_cyc-lig	92	290	5.10000000000004e-39	IPR002698	5-formyltetrahydrofolate cyclo-ligase;Molecular Function: ATP binding (GO:0005524), Biological Process: folic acid and derivative biosynthetic process (GO:0009396), Molecular Function: 5-formyltetrahydrofolate cyclo-ligase activity (GO:0030272
AT1G76810	AT1G76810.1	1294	HMMPfam	PF00009	GTP_EFTU	706	914	1.5e-32	IPR000795	Protein synthesis factor, GTP-binding;Molecular Function: GTPase activity (GO:0003924), Molecular Function: GTP binding (GO:0005525
AT1G76810	AT1G76810.1	1294	HMMPfam	PF03144	GTP_EFTU_D2	942	1019	2.5e-10	IPR004161	Translation elongation factor EFTu/EF1A, domain 2;Molecular Function: GTP binding (GO:0005525
AT1G76810	AT1G76810.1	1294	HMMPfam	PF11987	IF-2	1038	1144	1.5e-19	NULL	NUL
AT1G77180	AT1G77180.1;AT1G77180.2;AT1G77180.3	613;511	HMMPfam	PF02731	SKIP_SNW	187	346	1.70000000000001e-63;1.5e-66	IPR004015	SKI-interacting protein SKIP, SNW domain;Biological Process: nuclear mRNA splicing, via spliceosome (GO:0000398), Molecular Function: protein binding (GO:0005515), Cellular Component: spliceosomal complex (GO:0005681
AT1G78820	AT1G78820.1	455	HMMPfam	PF01453	B_lectin	92	188	4.5e-21	IPR001480	Curculin-like (mannose-binding) lectin;Molecular Function: sugar binding (GO:0005529
AT1G78820	AT1G78820.1	455	HMMPfam	PF08276	PAN_2	402	434	0.02	IPR013227	PAN-2 domai
AT1G80030	AT1G80030.1;AT1G80030.3;AT1G80030.2	500	HMMPfam	PF00226	DnaJ	75	136	7e-24	IPR001623	Heat shock protein DnaJ, N-terminal;Molecular Function: heat shock protein binding (GO:0031072
AT1G80030	AT1G80030.1;AT1G80030.3;AT1G80030.2	500	HMMPfam	PF00684	DnaJ_CXXCXGXG	209	286	2.8e-15	IPR001305	Heat shock protein DnaJ, cysteine-rich domain;Biological Process: protein folding (GO:0006457), Molecular Function: heat shock protein binding (GO:0031072), Molecular Function: unfolded protein binding (GO:0051082
AT1G80030	AT1G80030.1;AT1G80030.3;AT1G80030.2	500	HMMPfam	PF01556	DnaJ_C	324	422	1.5e-20	IPR002939	Chaperone DnaJ, C-terminal;Biological Process: protein folding (GO:0006457), Molecular Function: unfolded protein binding (GO:0051082
AT2G02740	AT2G02740.2	267	HMMPfam	PF08536	Whirly	90	228	1.09999999999999e-61	IPR013742	Plant transcription facto
AT2G02740	AT2G02740.1	268	HMMPfam	PF08536	Whirly	90	229	6.80000000000006e-61	IPR013742	Plant transcription facto
AT2G04530	AT2G04530.1	354	HMMPfam	PF00753	Lactamase_B	118	212	0.048	NULL	NUL
AT2G05920	AT2G05920.1	754	HMMPfam	PF00082	Peptidase_S8	119	577	1.1e-26	IPR000209	Peptidase S8/S53, subtilisin/kexin/sedolisin;Molecular Function: serine-type endopeptidase activity (GO:0004252), Biological Process: proteolysis (GO:0006508
AT2G05920	AT2G05920.1	754	HMMPfam	PF02225	PA	367	455	2.3e-14	IPR003137	Protease-associated P
AT2G05920	AT2G05920.1	754	HMMPfam	PF05922	Inhibitor_I9	28	102	4.40000000000001e-09	IPR010259	Proteinase inhibitor I9, subtilisin propeptide;Molecular Function: serine-type endopeptidase activity (GO:0004252), Molecular Function: identical protein binding (GO:0042802), Biological Process: negative regulation of catalytic activity (GO:0043086
AT2G16430	AT2G16430.1	348	HMMPfam	PF00149	Metallophos	41	239	2.5e-24	IPR004843	Metallophosphoesterase;Molecular Function: hydrolase activity (GO:0016787
AT2G16430	AT2G16430.2	468	HMMPfam	PF00149	Metallophos	161	359	6.8e-27	IPR004843	Metallophosphoesterase;Molecular Function: hydrolase activity (GO:0016787
AT2G18510	AT2G18510.1	363	HMMPfam	PF00076	RRM_1	27	97	2.1e-14	IPR000504	RNA recognition motif, RNP-1;Molecular Function: nucleic acid binding (GO:0003676
AT2G18510	AT2G18510.1	363	HMMPfam	PF00076	RRM_1	114	184	2.6e-16	IPR000504	RNA recognition motif, RNP-1;Molecular Function: nucleic acid binding (GO:0003676
AT2G18740	AT2G18740.2	78	HMMPfam	PF01423	LSM	20	67	5.69999999999999e-09	IPR001163	Like-Sm ribonucleoprotein (LSM) domai
AT2G18740	AT2G18740.1	88	HMMPfam	PF01423	LSM	20	83	2.1e-14	IPR001163	Like-Sm ribonucleoprotein (LSM) domai
AT2G19470	AT2G19470.1	433	HMMPfam	PF00069	Pkinase	9	244	6.40000000000004e-36	IPR017442	Serine/threonine-protein kinase-like domain;Molecular Function: protein kinase activity (GO:0004672), Molecular Function: ATP binding (GO:0005524), Biological Process: protein amino acid phosphorylation (GO:0006468
AT2G19480	AT2G19480.1;AT2G19480.2;AT2G19480.3	379;373;372	HMMPfam	PF00956	NAP	52	298	2.50000000000001e-80;2.39999999999997e-80;3e-83	IPR002164	Nucleosome assembly protein (NAP);Cellular Component: nucleus (GO:0005634), Biological Process: nucleosome assembly (GO:0006334
AT2G19520	AT2G19520.1	507	HMMPfam	PF00400	WD40	226	248	31	IPR019781	WD40 repeat, subgrou
AT2G19520	AT2G19520.1	507	HMMPfam	PF00400	WD40	286	321	0.0066	IPR019781	WD40 repeat, subgrou
AT2G19520	AT2G19520.1	507	HMMPfam	PF00400	WD40	331	366	0.00011	IPR019781	WD40 repeat, subgrou
AT2G19520	AT2G19520.1	507	HMMPfam	PF00400	WD40	377	415	2.6e-05	IPR019781	WD40 repeat, subgrou
AT2G19520	AT2G19520.1	507	HMMPfam	PF12265	CAF1C_H4-bd	65	134	7.90000000000001e-17	IPR022052	Histone-binding protein RBBP
AT2G19730	AT2G19730.1;AT2G19730.2;AT2G19730.3	143	HMMPfam	PF01778	Ribosomal_L28e	6	135	8.79999999999995e-52	IPR002672	Ribosomal protein L28e;Molecular Function: structural constituent of ribosome (GO:0003735), Cellular Component: intracellular (GO:0005622), Cellular Component: ribosome (GO:0005840), Biological Process: translation (GO:0006412
AT2G19870	AT2G19870.1	589	HMMPfam	PF00588	SpoU_methylase	418	541	1.5e-22	IPR001537	tRNA/rRNA methyltransferase, SpoU;Molecular Function: RNA binding (GO:0003723), Biological Process: RNA processing (GO:0006396), Molecular Function: RNA methyltransferase activity (GO:0008173
AT2G19870	AT2G19870.1	589	HMMPfam	PF08032	SpoU_sub_bind	316	400	5.2e-08	IPR013123	RNA 2-O ribose methyltransferase, substrate binding;Molecular Function: methyltransferase activity (GO:0008168
AT2G21390	AT2G21390.1	1218	HMMPfam	PF00400	WD40	3	37	850.000000000001	IPR019781	WD40 repeat, subgrou
AT2G21390	AT2G21390.1	1218	HMMPfam	PF00400	WD40	44	79	3.1e-05	IPR019781	WD40 repeat, subgrou
AT2G21390	AT2G21390.1	1218	HMMPfam	PF00400	WD40	84	121	7e-07	IPR019781	WD40 repeat, subgrou
AT2G21390	AT2G21390.1	1218	HMMPfam	PF00400	WD40	126	163	2.6e-08	IPR019781	WD40 repeat, subgrou
AT2G21390	AT2G21390.1	1218	HMMPfam	PF00400	WD40	196	231	1e-04	IPR019781	WD40 repeat, subgrou
AT2G21390	AT2G21390.1	1218	HMMPfam	PF00400	WD40	243	276	0.0017	IPR019781	WD40 repeat, subgrou
AT2G21390	AT2G21390.1	1218	HMMPfam	PF04053	Coatomer_WDAD	340	768	0	IPR006692	Coatomer, WD associated region;Molecular Function: structural molecule activity (GO:0005198), Molecular Function: protein binding (GO:0005515), Biological Process: intracellular protein transport (GO:0006886), Biological Process: vesicle-mediated transport (GO:0016192), Cellular Component: membrane coat (GO:0030117
AT2G21390	AT2G21390.1	1218	HMMPfam	PF06957	COPI_C	815	1218	0	IPR010714	Coatomer, alpha subunit, C-terminal;Molecular Function: structural molecule activity (GO:0005198), Molecular Function: protein binding (GO:0005515), Biological Process: intracellular protein transport (GO:0006886), Biological Process: vesicle-mediated transport (GO:0016192), Cellular Component: COPI vesicle coat (GO:0030126
AT2G21660	AT2G21660.2;AT2G21660.1	159;176	HMMPfam	PF00076	RRM_1	11	79	2.90000000000001e-20;4.6e-23	IPR000504	RNA recognition motif, RNP-1;Molecular Function: nucleic acid binding (GO:0003676
AT2G22360	AT2G22360.1	442	HMMPfam	PF00226	DnaJ	86	147	1.2e-24	IPR001623	Heat shock protein DnaJ, N-terminal;Molecular Function: heat shock protein binding (GO:0031072
AT2G22360	AT2G22360.1	442	HMMPfam	PF00684	DnaJ_CXXCXGXG	211	287	1.7e-15	IPR001305	Heat shock protein DnaJ, cysteine-rich domain;Biological Process: protein folding (GO:0006457), Molecular Function: heat shock protein binding (GO:0031072), Molecular Function: unfolded protein binding (GO:0051082
AT2G22360	AT2G22360.1	442	HMMPfam	PF01556	DnaJ_C	325	424	4.9e-26	IPR002939	Chaperone DnaJ, C-terminal;Biological Process: protein folding (GO:0006457), Molecular Function: unfolded protein binding (GO:0051082
AT2G22870	AT2G22870.1	300	HMMPfam	PF01926	MMR_HSR1	132	240	5.5e-15	IPR002917	GTP-binding protein, HSR1-related;Molecular Function: GTP binding (GO:0005525), Cellular Component: intracellular (GO:0005622
AT2G23070	AT2G23070.1	432	HMMPfam	PF00069	Pkinase	132	417	1.6e-57	IPR017442	Serine/threonine-protein kinase-like domain;Molecular Function: protein kinase activity (GO:0004672), Molecular Function: ATP binding (GO:0005524), Biological Process: protein amino acid phosphorylation (GO:0006468
AT2G23350	AT2G23350.1	662	HMMPfam	PF00076	RRM_1	48	117	3.4e-15	IPR000504	RNA recognition motif, RNP-1;Molecular Function: nucleic acid binding (GO:0003676
AT2G23350	AT2G23350.1	662	HMMPfam	PF00076	RRM_1	136	204	7.90000000000001e-19	IPR000504	RNA recognition motif, RNP-1;Molecular Function: nucleic acid binding (GO:0003676
AT2G23350	AT2G23350.1	662	HMMPfam	PF00076	RRM_1	227	295	1.3e-21	IPR000504	RNA recognition motif, RNP-1;Molecular Function: nucleic acid binding (GO:0003676
AT2G23350	AT2G23350.1	662	HMMPfam	PF00076	RRM_1	330	398	1.8e-17	IPR000504	RNA recognition motif, RNP-1;Molecular Function: nucleic acid binding (GO:0003676
AT2G23350	AT2G23350.1	662	HMMPfam	PF00658	PABP	561	630	1e-25	IPR002004	Polyadenylate-binding protein/Hyperplastic disc protein;Molecular Function: RNA binding (GO:0003723
AT2G23420	AT2G23420.1	557	HMMPfam	PF04095	NAPRTase	173	271	2.9e-11	IPR015977	Nicotinate phosphoribosyltransferase-lik
AT2G23420	AT2G23420.1	557	HMMPfam	PF04095	NAPRTase	278	436	8.70000000000003e-24	IPR015977	Nicotinate phosphoribosyltransferase-lik
AT2G25110	AT2G25110.1	218	HMMPfam	PF02815	MIR	54	195	4.6e-12	IPR003608	MIR;Cellular Component: membrane (GO:0016020
AT2G27100	AT2G27100.1	720	HMMPfam	PF04959	ARS2	443	554	0.02	IPR007042	Arsenite-resistance protein
AT2G27100	AT2G27100.1	720	HMMPfam	PF12066	DUF3546	197	280	2.1e-26	IPR021933	Protein of unknown function DUF354
AT2G32230	AT2G32230.1	572	HMMPfam	PF01535	PPR	105	128	14	IPR002885	Pentatricopeptide repea
AT2G32920	AT2G32920.1	440	HMMPfam	PF00085	Thioredoxin	32	133	1.8e-28	IPR013766	Thioredoxin domain;Biological Process: cell redox homeostasis (GO:0045454
AT2G32920	AT2G32920.1	440	HMMPfam	PF00085	Thioredoxin	165	265	2.1e-25	IPR013766	Thioredoxin domain;Biological Process: cell redox homeostasis (GO:0045454
AT2G33410	AT2G33410.1	404	HMMPfam	PF00076	RRM_1	8	74	9.20000000000002e-14	IPR000504	RNA recognition motif, RNP-1;Molecular Function: nucleic acid binding (GO:0003676
AT2G33410	AT2G33410.1	404	HMMPfam	PF00076	RRM_1	112	180	4.3e-14	IPR000504	RNA recognition motif, RNP-1;Molecular Function: nucleic acid binding (GO:0003676
AT2G33530	AT2G33530.1	465	HMMPfam	PF00450	Peptidase_S10	39	457	1.5e-120	IPR001563	Peptidase S10, serine carboxypeptidase;Molecular Function: serine-type carboxypeptidase activity (GO:0004185), Biological Process: proteolysis (GO:0006508
AT2G33800	AT2G33800.1	303	HMMPfam	PF00333	Ribosomal_S5	147	211	7.79999999999999e-22	IPR013810	Ribosomal protein S5, N-terminal;Molecular Function: RNA binding (GO:0003723), Molecular Function: structural constituent of ribosome (GO:0003735), Cellular Component: intracellular (GO:0005622), Cellular Component: ribosome (GO:0005840), Biological Process: translation (GO:0006412
AT2G33800	AT2G33800.1	303	HMMPfam	PF03719	Ribosomal_S5_C	223	295	1.4e-24	IPR005324	Ribosomal protein S5, C-terminal;Molecular Function: structural constituent of ribosome (GO:0003735), Cellular Component: intracellular (GO:0005622), Cellular Component: ribosome (GO:0005840), Biological Process: translation (GO:0006412
AT2G34040	AT2G34040.2	442	HMMPfam	PF05918	API5	11	430	0	IPR008383	Apoptosis inhibitory
AT2G34040	AT2G34040.1	553	HMMPfam	PF05918	API5	11	553	0	IPR008383	Apoptosis inhibitory
AT2G34160	AT2G34160.1	130	HMMPfam	PF01918	Alba	21	84	1.8e-10	IPR002775	Alba, DNA/RNA-binding protein;Molecular Function: nucleic acid binding (GO:0003676
AT2G34810	AT2G34810.1	540	HMMPfam	PF01565	FAD_binding_4	83	220	2.2e-21	IPR006094	FAD linked oxidase, N-terminal;Molecular Function: oxidoreductase activity (GO:0016491), Molecular Function: FAD binding (GO:0050660
AT2G34810	AT2G34810.1	540	HMMPfam	PF08031	BBE	479	537	3.1e-15	IPR012951	Berberine/berberine-like;Molecular Function: oxidoreductase activity (GO:0016491), Molecular Function: FAD binding (GO:0050660
AT2G35410	AT2G35410.1	308	HMMPfam	PF00076	RRM_1	97	165	1.4e-15	IPR000504	RNA recognition motif, RNP-1;Molecular Function: nucleic acid binding (GO:0003676
AT2G35410	AT2G35410.1	308	HMMPfam	PF00076	RRM_1	196	267	7.79999999999999e-14	IPR000504	RNA recognition motif, RNP-1;Molecular Function: nucleic acid binding (GO:0003676
AT2G36460	AT2G36460.2	267	HMMPfam	PF00274	Glycolytic	1	267	1.79999999999997e-128	IPR000741	Fructose-bisphosphate aldolase, class-I;Molecular Function: fructose-bisphosphate aldolase activity (GO:0004332), Biological Process: glycolysis (GO:0006096
AT2G36460	AT2G36460.1	358	HMMPfam	PF00274	Glycolytic	11	358	0	IPR000741	Fructose-bisphosphate aldolase, class-I;Molecular Function: fructose-bisphosphate aldolase activity (GO:0004332), Biological Process: glycolysis (GO:0006096
AT2G37220	AT2G37220.1	289	HMMPfam	PF00076	RRM_1	93	163	1.5e-20	IPR000504	RNA recognition motif, RNP-1;Molecular Function: nucleic acid binding (GO:0003676
AT2G37220	AT2G37220.1	289	HMMPfam	PF00076	RRM_1	206	276	1.1e-21	IPR000504	RNA recognition motif, RNP-1;Molecular Function: nucleic acid binding (GO:0003676
AT2G38025	AT2G38025.1	234	HMMPfam	PF02338	OTU	82	192	1.1e-08	IPR003323	Ovarian tumour, otubai
AT2G38040	AT2G38040.1;AT2G38040.2	769	HMMPfam	PF03255	ACCA	97	240	1.29999999999998e-60	IPR020582	Acetyl-CoA carboxylase, alpha subunit, conserved regio
AT2G38280	AT2G38280.1;AT2G38280.2	839	HMMPfam	PF00962	A_deaminase	384	790	3.10000000000005e-113	IPR001365	Adenosine/AMP deaminase;Biological Process: purine ribonucleoside monophosphate biosynthetic process (GO:0009168), Molecular Function: deaminase activity (GO:0019239
AT2G39670	AT2G39670.1	428	HMMPfam	PF04055	Radical_SAM	172	335	1.8e-10	IPR007197	Radical SAM;Molecular Function: catalytic activity (GO:0003824), Molecular Function: iron-sulfur cluster binding (GO:0051536
AT2G39670	AT2G39670.2	431	HMMPfam	PF04055	Radical_SAM	175	338	1.9e-10	IPR007197	Radical SAM;Molecular Function: catalytic activity (GO:0003824), Molecular Function: iron-sulfur cluster binding (GO:0051536
AT2G40290	AT2G40290.1;AT2G40290.2;AT2G40290.3	344;241	HMMPfam	PF00575	S1	19	92	8.1e-10;4.3e-10	IPR003029	Ribosomal protein S1, RNA-binding domain;Molecular Function: RNA binding (GO:0003723
AT2G40290	AT2G40290.2;AT2G40290.3	241	HMMPfam	PF07541	EIF_2_alpha	129	226	5.40000000000002e-27	IPR011488	Eukaryotic translation initiation factor 2, alpha subunit;Molecular Function: RNA binding (GO:0003723), Molecular Function: translation initiation factor activity (GO:0003743), Cellular Component: eukaryotic translation initiation factor 2 complex (GO:0005850), Biological Process: translation (GO:0006412
AT2G40290	AT2G40290.1	344	HMMPfam	PF07541	EIF_2_alpha	129	260	4.5e-45	IPR011488	Eukaryotic translation initiation factor 2, alpha subunit;Molecular Function: RNA binding (GO:0003723), Molecular Function: translation initiation factor activity (GO:0003743), Cellular Component: eukaryotic translation initiation factor 2 complex (GO:0005850), Biological Process: translation (GO:0006412
AT2G41475	AT2G41475.1	179	HMMPfam	PF06232	ATS3	43	158	6.80000000000006e-51	IPR010417	Embryo-specific
AT2G42910	AT2G42910.1	337	HMMPfam	PF00156	Pribosyltran	172	277	0.00015	IPR000836	Phosphoribosyltransferase;Biological Process: nucleoside metabolic process (GO:0009116
AT2G43030	AT2G43030.1	271	HMMPfam	PF00297	Ribosomal_L3	96	258	3.1e-41	IPR000597	Ribosomal protein L3;Molecular Function: structural constituent of ribosome (GO:0003735), Cellular Component: intracellular (GO:0005622), Cellular Component: ribosome (GO:0005840), Biological Process: translation (GO:0006412
AT2G43770	AT2G43770.1	343	HMMPfam	PF00400	WD40	48	80	5.39999999999999e-05	IPR019781	WD40 repeat, subgrou
AT2G43770	AT2G43770.1	343	HMMPfam	PF00400	WD40	90	124	5.8e-05	IPR019781	WD40 repeat, subgrou
AT2G43770	AT2G43770.1	343	HMMPfam	PF00400	WD40	128	167	0.00018	IPR019781	WD40 repeat, subgrou
AT2G43770	AT2G43770.1	343	HMMPfam	PF00400	WD40	181	208	0.12	IPR019781	WD40 repeat, subgrou
AT2G43770	AT2G43770.1	343	HMMPfam	PF00400	WD40	213	250	5.39999999999999e-06	IPR019781	WD40 repeat, subgrou
AT2G43770	AT2G43770.1	343	HMMPfam	PF00400	WD40	277	300	1.5	IPR019781	WD40 repeat, subgrou
AT2G43770	AT2G43770.1	343	HMMPfam	PF00400	WD40	307	340	0.00097	IPR019781	WD40 repeat, subgrou
AT2G45180	AT2G45180.1	134	HMMPfam	PF00234	Tryp_alpha_amyl	52	133	4.80000000000001e-05	IPR003612	Plant lipid transfer protein/seed storage/trypsin-alpha amylase inhibito
AT2G45220	AT2G45220.1	511	HMMPfam	PF01095	Pectinesterase	206	497	0	IPR000070	Pectinesterase, catalytic;Cellular Component: cell wall (GO:0005618), Molecular Function: pectinesterase activity (GO:0030599), Biological Process: cell wall modification (GO:0042545
AT2G45220	AT2G45220.1	511	HMMPfam	PF04043	PMEI	27	171	1.3e-20	IPR006501	Pectinesterase inhibitor;Molecular Function: enzyme inhibitor activity (GO:0004857), Molecular Function: pectinesterase activity (GO:0030599
AT2G45640	AT2G45640.2	149	HMMPfam	PF06487	SAP18	30	148	5.7e-38	IPR010516	Sin3 associated polypeptide p1
AT2G45640	AT2G45640.1	152	HMMPfam	PF06487	SAP18	30	151	1.2e-38	IPR010516	Sin3 associated polypeptide p1
AT2G47450	AT2G47450.1	373	HMMPfam	PF00023	Ank	194	224	0.0087	IPR002110	Ankyrin repea
AT2G47450	AT2G47450.1	373	HMMPfam	PF00385	Chromo	322	367	7.5e-06	IPR000953	Chromo domain;Cellular Component: chromatin (GO:0000785), Molecular Function: chromatin binding (GO:0003682), Cellular Component: nucleus (GO:0005634), Biological Process: chromatin assembly or disassembly (GO:0006333
AT2G47580	AT2G47580.1	250	HMMPfam	PF00076	RRM_1	20	90	1.1e-07	IPR000504	RNA recognition motif, RNP-1;Molecular Function: nucleic acid binding (GO:0003676
AT2G47580	AT2G47580.1	250	HMMPfam	PF00076	RRM_1	179	242	9.8e-10	IPR000504	RNA recognition motif, RNP-1;Molecular Function: nucleic acid binding (GO:0003676
AT3G01540	AT3G01540.1;AT3G01540.3;AT3G01540.2;AT3G01540.4	618;619	HMMPfam	PF00270	DEAD	182	351	6.19999999999995e-47;7.9e-50	IPR011545	DNA/RNA helicase, DEAD/DEAH box type, N-terminal;Molecular Function: nucleic acid binding (GO:0003676), Molecular Function: ATP binding (GO:0005524), Molecular Function: ATP-dependent helicase activity (GO:0008026
AT3G01540	AT3G01540.1;AT3G01540.3;AT3G01540.2;AT3G01540.4	618;619	HMMPfam	PF00271	Helicase_C	426	497	1.1e-23;1.4e-26	IPR001650	DNA/RNA helicase, C-terminal;Molecular Function: nucleic acid binding (GO:0003676), Molecular Function: helicase activity (GO:0004386), Molecular Function: ATP binding (GO:0005524
AT3G01540	AT3G01540.1;AT3G01540.3;AT3G01540.2;AT3G01540.4	618;619	HMMPfam	PF00397	WW	19	49	7.4e-06;9.4e-09	IPR001202	WW/Rsp5/WWP;Molecular Function: protein binding (GO:0005515
AT3G02510	AT3G02510.1;AT3G02510.2	393;310	HMMPfam	PF00415	RCC1	9	53	0.0083;7.4e-06	IPR000408	Regulator of chromosome condensation, RCC
AT3G02510	AT3G02510.1;AT3G02510.2	393;310	HMMPfam	PF00415	RCC1	56	106	2.1e-11;1.9e-14	IPR000408	Regulator of chromosome condensation, RCC
AT3G02510	AT3G02510.1;AT3G02510.2	393;310	HMMPfam	PF00415	RCC1	109	165	3.60000000000001e-09;3.2e-12	IPR000408	Regulator of chromosome condensation, RCC
AT3G02510	AT3G02510.1;AT3G02510.2	393;310	HMMPfam	PF00415	RCC1	214	263	3.1e-13;2.8e-16	IPR000408	Regulator of chromosome condensation, RCC
AT3G02510	AT3G02510.2	310	HMMPfam	PF00415	RCC1	266	307	2.7e-10	IPR000408	Regulator of chromosome condensation, RCC
AT3G02510	AT3G02510.1	393	HMMPfam	PF00415	RCC1	266	317	1.6e-14	IPR000408	Regulator of chromosome condensation, RCC
AT3G02510	AT3G02510.1	393	HMMPfam	PF00415	RCC1	320	385	2.5e-11	IPR000408	Regulator of chromosome condensation, RCC
AT3G02830	AT3G02830.1	397	HMMPfam	PF00642	zf-CCCH	41	67	7e-06	IPR000571	Zinc finger, CCCH-type;Molecular Function: nucleic acid binding (GO:0003676), Molecular Function: zinc ion binding (GO:0008270
AT3G02830	AT3G02830.1	397	HMMPfam	PF00642	zf-CCCH	88	112	1e-06	IPR000571	Zinc finger, CCCH-type;Molecular Function: nucleic acid binding (GO:0003676), Molecular Function: zinc ion binding (GO:0008270
AT3G02830	AT3G02830.1	397	HMMPfam	PF00642	zf-CCCH	134	158	2.2e-06	IPR000571	Zinc finger, CCCH-type;Molecular Function: nucleic acid binding (GO:0003676), Molecular Function: zinc ion binding (GO:0008270
AT3G02830	AT3G02830.1	397	HMMPfam	PF00642	zf-CCCH	275	301	1.3e-06	IPR000571	Zinc finger, CCCH-type;Molecular Function: nucleic acid binding (GO:0003676), Molecular Function: zinc ion binding (GO:0008270
AT3G02830	AT3G02830.1	397	HMMPfam	PF00642	zf-CCCH	321	347	3.6e-06	IPR000571	Zinc finger, CCCH-type;Molecular Function: nucleic acid binding (GO:0003676), Molecular Function: zinc ion binding (GO:0008270
AT3G03630	AT3G03630.1	404	HMMPfam	PF00291	PALP	103	378	4.2e-47	IPR001926	Pyridoxal phosphate-dependent enzyme, beta subunit;Molecular Function: catalytic activity (GO:0003824), Biological Process: metabolic process (GO:0008152), Molecular Function: pyridoxal phosphate binding (GO:0030170
AT3G04260	AT3G04260.1	910	HMMPfam	PF02037	SAP	537	569	4.2e-08	IPR003034	DNA-binding SAP;Molecular Function: nucleic acid binding (GO:0003676
AT3G05060	AT3G05060.1	533	HMMPfam	PF01798	Nop	252	399	4.70000000000003e-59	IPR002687	Pre-mRNA processing ribonucleoprotein, snoRNA-binding domai
AT3G05060	AT3G05060.1	533	HMMPfam	PF08060	NOSIC	160	212	5.09999999999998e-26	IPR012976	NOSI
AT3G05060	AT3G05060.1	533	HMMPfam	PF08156	NOP5NT	3	67	1.2e-20	IPR012974	NOP5, N-termina
AT3G06650	AT3G06650.1	608	HMMPfam	PF00285	Citrate_synt	400	598	1.8e-16	IPR002020	Citrate synthase-like;Biological Process: cellular carbohydrate metabolic process (GO:0044262), Molecular Function: transferase activity, transferring acyl groups, acyl groups converted into alkyl on transfer (GO:0046912
AT3G06650	AT3G06650.1	608	HMMPfam	PF00549	Ligase_CoA	174	297	2.1e-09	IPR005811	ATP-citrate lyase/succinyl-CoA ligase;Molecular Function: catalytic activity (GO:0003824), Biological Process: metabolic process (GO:0008152
AT3G06650	AT3G06650.1	608	HMMPfam	PF02629	CoA_binding	20	113	0.088	IPR003781	CoA-bindin
AT3G06980	AT3G06980.1	781	HMMPfam	PF00270	DEAD	399	574	6.90000000000001e-33	IPR011545	DNA/RNA helicase, DEAD/DEAH box type, N-terminal;Molecular Function: nucleic acid binding (GO:0003676), Molecular Function: ATP binding (GO:0005524), Molecular Function: ATP-dependent helicase activity (GO:0008026
AT3G06980	AT3G06980.1	781	HMMPfam	PF00271	Helicase_C	661	738	8.40000000000001e-16	IPR001650	DNA/RNA helicase, C-terminal;Molecular Function: nucleic acid binding (GO:0003676), Molecular Function: helicase activity (GO:0004386), Molecular Function: ATP binding (GO:0005524
AT3G07810	AT3G07810.1;AT3G07810.2	494;495	HMMPfam	PF00076	RRM_1	8	69	2.7e-13;3.4e-16	IPR000504	RNA recognition motif, RNP-1;Molecular Function: nucleic acid binding (GO:0003676
AT3G07810	AT3G07810.1;AT3G07810.2	494;495	HMMPfam	PF00076	RRM_1	110	176	1.6e-15;2e-18	IPR000504	RNA recognition motif, RNP-1;Molecular Function: nucleic acid binding (GO:0003676
AT3G09200	AT3G09200.2	287	HMMPfam	PF00428	Ribosomal_60s	200	284	9.8e-14	IPR001813	Ribosomal protein 60S;Molecular Function: structural constituent of ribosome (GO:0003735), Cellular Component: intracellular (GO:0005622), Cellular Component: ribosome (GO:0005840), Biological Process: translational elongation (GO:0006414
AT3G09200	AT3G09200.1	320	HMMPfam	PF00428	Ribosomal_60s	233	317	1.5e-16	IPR001813	Ribosomal protein 60S;Molecular Function: structural constituent of ribosome (GO:0003735), Cellular Component: intracellular (GO:0005622), Cellular Component: ribosome (GO:0005840), Biological Process: translational elongation (GO:0006414
AT3G09200	AT3G09200.1	320	HMMPfam	PF00466	Ribosomal_L10	6	107	1.1e-21	IPR001790	Ribosomal protein L10;Cellular Component: intracellular (GO:0005622), Biological Process: ribosome biogenesis (GO:0042254
AT3G09840	AT3G09840.1	809	HMMPfam	PF00004	AAA	244	373	5.3e-47	IPR003959	ATPase, AAA-type, core;Molecular Function: ATP binding (GO:0005524
AT3G09840	AT3G09840.1	809	HMMPfam	PF00004	AAA	517	651	2.5e-46	IPR003959	ATPase, AAA-type, core;Molecular Function: ATP binding (GO:0005524
AT3G09840	AT3G09840.1	809	HMMPfam	PF02359	CDC48_N	29	111	6.3e-24	IPR003338	ATPase, AAA-type, VAT, N-terminal;Molecular Function: ATP binding (GO:0005524
AT3G09840	AT3G09840.1	809	HMMPfam	PF02933	CDC48_2	131	194	1.6e-11	IPR004201	Cell division protein 48, CDC48, domain 2;Molecular Function: ATP binding (GO:0005524
AT3G10690	AT3G10690.1	950	HMMPfam	PF00521	DNA_topoisoIV	125	559	0	IPR002205	DNA topoisomerase, type IIA, subunit A/C-terminal;Molecular Function: DNA binding (GO:0003677), Molecular Function: DNA topoisomerase (ATP-hydrolyzing) activity (GO:0003918), Molecular Function: ATP binding (GO:0005524), Cellular Component: chromosome (GO:0005694), Biological Process: DNA topological change (GO:0006265
AT3G10690	AT3G10690.1	950	HMMPfam	PF03989	DNA_gyraseA_C	600	647	0.00029	IPR006691	DNA gyrase/topoisomerase IV, subunit A, C-terminal beta-pinwheel;Molecular Function: DNA binding (GO:0003677), Molecular Function: DNA topoisomerase activity (GO:0003916), Molecular Function: ATP binding (GO:0005524), Cellular Component: chromosome (GO:0005694), Biological Process: DNA topological change (GO:0006265
AT3G10690	AT3G10690.1	950	HMMPfam	PF03989	DNA_gyraseA_C	649	700	0.00026	IPR006691	DNA gyrase/topoisomerase IV, subunit A, C-terminal beta-pinwheel;Molecular Function: DNA binding (GO:0003677), Molecular Function: DNA topoisomerase activity (GO:0003916), Molecular Function: ATP binding (GO:0005524), Cellular Component: chromosome (GO:0005694), Biological Process: DNA topological change (GO:0006265
AT3G10690	AT3G10690.1	950	HMMPfam	PF03989	DNA_gyraseA_C	705	750	2.7	IPR006691	DNA gyrase/topoisomerase IV, subunit A, C-terminal beta-pinwheel;Molecular Function: DNA binding (GO:0003677), Molecular Function: DNA topoisomerase activity (GO:0003916), Molecular Function: ATP binding (GO:0005524), Cellular Component: chromosome (GO:0005694), Biological Process: DNA topological change (GO:0006265
AT3G10690	AT3G10690.1	950	HMMPfam	PF03989	DNA_gyraseA_C	754	800	5.3e-06	IPR006691	DNA gyrase/topoisomerase IV, subunit A, C-terminal beta-pinwheel;Molecular Function: DNA binding (GO:0003677), Molecular Function: DNA topoisomerase activity (GO:0003916), Molecular Function: ATP binding (GO:0005524), Cellular Component: chromosome (GO:0005694), Biological Process: DNA topological change (GO:0006265
AT3G10690	AT3G10690.1	950	HMMPfam	PF03989	DNA_gyraseA_C	825	870	0.00055	IPR006691	DNA gyrase/topoisomerase IV, subunit A, C-terminal beta-pinwheel;Molecular Function: DNA binding (GO:0003677), Molecular Function: DNA topoisomerase activity (GO:0003916), Molecular Function: ATP binding (GO:0005524), Cellular Component: chromosome (GO:0005694), Biological Process: DNA topological change (GO:0006265
AT3G10690	AT3G10690.1	950	HMMPfam	PF03989	DNA_gyraseA_C	882	928	0.00037	IPR006691	DNA gyrase/topoisomerase IV, subunit A, C-terminal beta-pinwheel;Molecular Function: DNA binding (GO:0003677), Molecular Function: DNA topoisomerase activity (GO:0003916), Molecular Function: ATP binding (GO:0005524), Cellular Component: chromosome (GO:0005694), Biological Process: DNA topological change (GO:0006265
AT3G12700	AT3G12700.2	263	HMMPfam	PF00026	Asp	105	159	7.3e-10	IPR001461	Peptidase A1;Molecular Function: aspartic-type endopeptidase activity (GO:0004190), Biological Process: proteolysis (GO:0006508
AT3G12700	AT3G12700.1	461	HMMPfam	PF00026	Asp	105	457	4.5e-20	IPR001461	Peptidase A1;Molecular Function: aspartic-type endopeptidase activity (GO:0004190), Biological Process: proteolysis (GO:0006508
AT3G12800	AT3G12800.1	298	HMMPfam	PF00106	adh_short	14	186	6.1e-25	IPR002198	Short-chain dehydrogenase/reductase SDR;Biological Process: metabolic process (GO:0008152), Molecular Function: oxidoreductase activity (GO:0016491
AT3G13224	AT3G13224.1;AT3G13224.2	231;358	HMMPfam	PF00076	RRM_1	21	88	1.4e-13;3.1e-13	IPR000504	RNA recognition motif, RNP-1;Molecular Function: nucleic acid binding (GO:0003676
AT3G13224	AT3G13224.1;AT3G13224.2	231;358	HMMPfam	PF00076	RRM_1	111	169	1.3e-15;2.4e-15	IPR000504	RNA recognition motif, RNP-1;Molecular Function: nucleic acid binding (GO:0003676
AT3G13460	AT3G13460.2	664	HMMPfam	PF04146	YTH	489	578	2.7e-25	IPR007275	YTH domai
AT3G13460	AT3G13460.4	666	HMMPfam	PF04146	YTH	491	580	2.7e-25	IPR007275	YTH domai
AT3G13460	AT3G13460.1	667	HMMPfam	PF04146	YTH	492	581	2.7e-25	IPR007275	YTH domai
AT3G13790	AT3G13790.2	581	HMMPfam	PF00251	Glyco_hydro_32N	56	375	3.4e-112	IPR013148	Glycosyl hydrolases family 32, N-termina
AT3G13790	AT3G13790.1	584	HMMPfam	PF00251	Glyco_hydro_32N	56	378	2.59999999999995e-115	IPR013148	Glycosyl hydrolases family 32, N-termina
AT3G13790	AT3G13790.2	581	HMMPfam	PF08244	Glyco_hydro_32C	447	535	6.3e-22	IPR013189	Glycosyl hydrolase family 32, C-termina
AT3G13790	AT3G13790.1	584	HMMPfam	PF08244	Glyco_hydro_32C	450	538	5.09999999999998e-19	IPR013189	Glycosyl hydrolase family 32, C-termina
AT3G15190	AT3G15190.1	202	HMMPfam	PF01649	Ribosomal_S20p	87	174	1.5e-15	IPR002583	Ribosomal protein S20;Molecular Function: RNA binding (GO:0003723), Molecular Function: structural constituent of ribosome (GO:0003735), Cellular Component: intracellular (GO:0005622), Cellular Component: ribosome (GO:0005840), Biological Process: translation (GO:0006412
AT3G15980	AT3G15980.1;AT3G15980.2;AT3G15980.4;AT3G15980.5;AT3G15980.3	909;918;914;930	HMMPfam	PF00400	WD40	9	43	0.32;0.33	IPR019781	WD40 repeat, subgrou
AT3G15980	AT3G15980.1;AT3G15980.2;AT3G15980.4;AT3G15980.5;AT3G15980.3	909;918;914;930	HMMPfam	PF00400	WD40	57	85	0.1;0.11	IPR019781	WD40 repeat, subgrou
AT3G15980	AT3G15980.1;AT3G15980.2;AT3G15980.4;AT3G15980.5;AT3G15980.3	909;918;914;930	HMMPfam	PF00400	WD40	92	127	9.3e-10;9.4e-10;9.5e-10	IPR019781	WD40 repeat, subgrou
AT3G15980	AT3G15980.1;AT3G15980.2;AT3G15980.4;AT3G15980.5;AT3G15980.3	909;918;914;930	HMMPfam	PF00400	WD40	132	171	2.7e-10;2.8e-10	IPR019781	WD40 repeat, subgrou
AT3G15980	AT3G15980.1;AT3G15980.2;AT3G15980.4;AT3G15980.5;AT3G15980.3	909;918;914;930	HMMPfam	PF00400	WD40	179	215	1.5e-07	IPR019781	WD40 repeat, subgrou
AT3G15980	AT3G15980.1;AT3G15980.2;AT3G15980.4;AT3G15980.5;AT3G15980.3	909;918;914;930	HMMPfam	PF00400	WD40	220	256	2.5e-13	IPR019781	WD40 repeat, subgrou
AT3G15980	AT3G15980.1;AT3G15980.2;AT3G15980.4;AT3G15980.3	909;918;914	HMMPfam	PF04053	Coatomer_WDAD	319	763	1.9e-167;2e-167	IPR006692	Coatomer, WD associated region;Molecular Function: structural molecule activity (GO:0005198), Molecular Function: protein binding (GO:0005515), Biological Process: intracellular protein transport (GO:0006886), Biological Process: vesicle-mediated transport (GO:0016192), Cellular Component: membrane coat (GO:0030117
AT3G15980	AT3G15980.5	930	HMMPfam	PF04053	Coatomer_WDAD	367	775	1.4e-156	IPR006692	Coatomer, WD associated region;Molecular Function: structural molecule activity (GO:0005198), Molecular Function: protein binding (GO:0005515), Biological Process: intracellular protein transport (GO:0006886), Biological Process: vesicle-mediated transport (GO:0016192), Cellular Component: membrane coat (GO:0030117
AT3G16220	AT3G16220.1	257	HMMPfam	PF10469	AKAP7_NLS	36	254	2.4e-09	IPR019510	Protein kinase A anchor protein, nuclear localisation signal domai
AT3G16230	AT3G16230.1;AT3G16230.3	409	HMMPfam	PF00013	KH_1	66	123	1.4e-07	IPR018111	K Homology, type 1, subgroup;Molecular Function: RNA binding (GO:0003723
AT3G16230	AT3G16230.2	449	HMMPfam	PF00013	KH_1	106	163	1.6e-07	IPR018111	K Homology, type 1, subgroup;Molecular Function: RNA binding (GO:0003723
AT3G16230	AT3G16230.1;AT3G16230.3	409	HMMPfam	PF10469	AKAP7_NLS	231	403	5.1e-13	IPR019510	Protein kinase A anchor protein, nuclear localisation signal domai
AT3G16230	AT3G16230.2	449	HMMPfam	PF10469	AKAP7_NLS	271	443	6.7e-13	IPR019510	Protein kinase A anchor protein, nuclear localisation signal domai
AT3G18035	AT3G18035.1	480	HMMPfam	PF00538	Linker_histone	65	131	9.9e-14	IPR005818	Histone H1/H5;Cellular Component: nucleosome (GO:0000786), Molecular Function: DNA binding (GO:0003677), Cellular Component: nucleus (GO:0005634), Biological Process: nucleosome assembly (GO:0006334
AT3G18080	AT3G18080.1	512	HMMPfam	PF00232	Glyco_hydro_1	41	511	0	IPR001360	Glycoside hydrolase, family 1;Molecular Function: hydrolase activity, hydrolyzing O-glycosyl compounds (GO:0004553), Biological Process: carbohydrate metabolic process (GO:0005975
AT3G18790	AT3G18790.1	300	HMMPfam	PF06246	Isy1	1	280	5.99999999999995e-88	IPR009360	Isy1-like splicin
AT3G18990	AT3G18990.1	341	HMMPfam	PF02362	B3	5	96	7.30000000000002e-12	IPR003340	Transcriptional factor B3;Molecular Function: DNA binding (GO:0003677), Biological Process: regulation of transcription, DNA-dependent (GO:0006355
AT3G18990	AT3G18990.1	341	HMMPfam	PF02362	B3	244	332	3.3e-12	IPR003340	Transcriptional factor B3;Molecular Function: DNA binding (GO:0003677), Biological Process: regulation of transcription, DNA-dependent (GO:0006355
AT3G19760	AT3G19760.1	408	HMMPfam	PF00270	DEAD	60	222	1.29999999999998e-40	IPR011545	DNA/RNA helicase, DEAD/DEAH box type, N-terminal;Molecular Function: nucleic acid binding (GO:0003676), Molecular Function: ATP binding (GO:0005524), Molecular Function: ATP-dependent helicase activity (GO:0008026
AT3G19760	AT3G19760.1	408	HMMPfam	PF00271	Helicase_C	293	369	4.00000000000001e-25	IPR001650	DNA/RNA helicase, C-terminal;Molecular Function: nucleic acid binding (GO:0003676), Molecular Function: helicase activity (GO:0004386), Molecular Function: ATP binding (GO:0005524
AT3G20820	AT3G20820.1	365	HMMPfam	PF00560	LRR_1	153	174	670	IPR001611	Leucine-rich repeat;Molecular Function: protein binding (GO:0005515
AT3G20820	AT3G20820.1	365	HMMPfam	PF00560	LRR_1	176	196	180	IPR001611	Leucine-rich repeat;Molecular Function: protein binding (GO:0005515
AT3G20820	AT3G20820.1	365	HMMPfam	PF00560	LRR_1	297	315	240	IPR001611	Leucine-rich repeat;Molecular Function: protein binding (GO:0005515
AT3G20820	AT3G20820.1	365	HMMPfam	PF00560	LRR_1	322	340	190	IPR001611	Leucine-rich repeat;Molecular Function: protein binding (GO:0005515
AT3G20820	AT3G20820.1	365	HMMPfam	PF08263	LRRNT_2	22	61	1.9e-07	IPR013210	Leucine-rich repeat-containing N-terminal domain, type
AT3G22060	AT3G22060.1	252	HMMPfam	PF01657	DUF26	84	136	1.9e-17	IPR002902	Protein of unknown function DUF2
AT3G22060	AT3G22060.1	252	HMMPfam	PF01657	DUF26	196	248	3.90000000000001e-17	IPR002902	Protein of unknown function DUF2
AT3G23700	AT3G23700.1	392	HMMPfam	PF00575	S1	106	180	1.2e-05	IPR003029	Ribosomal protein S1, RNA-binding domain;Molecular Function: RNA binding (GO:0003723
AT3G23700	AT3G23700.1	392	HMMPfam	PF00575	S1	193	270	8.50000000000001e-14	IPR003029	Ribosomal protein S1, RNA-binding domain;Molecular Function: RNA binding (GO:0003723
AT3G25920	AT3G25920.1	277	HMMPfam	PF00828	Ribosomal_L18e	107	234	4.6e-20	IPR021131	Ribosomal protein L18e/L1
AT3G26420	AT3G26420.1	245	HMMPfam	PF00076	RRM_1	10	79	5.90000000000001e-18	IPR000504	RNA recognition motif, RNP-1;Molecular Function: nucleic acid binding (GO:0003676
AT3G26420	AT3G26420.1	245	HMMPfam	PF00098	zf-CCHC	120	135	1.6e-05	IPR001878	Zinc finger, CCHC-type;Molecular Function: nucleic acid binding (GO:0003676), Molecular Function: zinc ion binding (GO:0008270
AT3G27850	AT3G27850.1	187	HMMPfam	PF00542	Ribosomal_L12	119	186	1.4e-23	IPR013823	Ribosomal protein L7/L12, C-terminal;Molecular Function: structural constituent of ribosome (GO:0003735), Cellular Component: intracellular (GO:0005622), Cellular Component: ribosome (GO:0005840), Biological Process: translation (GO:0006412
AT3G28730	AT3G28730.1	646	HMMPfam	PF00505	HMG_box	562	630	2.90000000000001e-20	IPR000910	High mobility group, HMG1/HMG2;Molecular Function: DNA binding (GO:0003677), Cellular Component: nucleus (GO:0005634
AT3G28730	AT3G28730.1	646	HMMPfam	PF03531	SSrecog	219	434	3.70000000000004e-100	IPR000969	Structure-specific recognition protein;Molecular Function: DNA binding (GO:0003677), Cellular Component: nucleus (GO:0005634
AT3G44110	AT3G44110.2;AT3G44110.1	343;420	HMMPfam	PF00226	DnaJ	15	72	1.3e-21;2.2e-24	IPR001623	Heat shock protein DnaJ, N-terminal;Molecular Function: heat shock protein binding (GO:0031072
AT3G44110	AT3G44110.2;AT3G44110.1	343;420	HMMPfam	PF00684	DnaJ_CXXCXGXG	135	214	5.10000000000001e-15;9.1e-18	IPR001305	Heat shock protein DnaJ, cysteine-rich domain;Biological Process: protein folding (GO:0006457), Molecular Function: heat shock protein binding (GO:0031072), Molecular Function: unfolded protein binding (GO:0051082
AT3G44110	AT3G44110.2	343	HMMPfam	PF01556	DnaJ_C	251	328	1.1e-16	IPR002939	Chaperone DnaJ, C-terminal;Biological Process: protein folding (GO:0006457), Molecular Function: unfolded protein binding (GO:0051082
AT3G44110	AT3G44110.1	420	HMMPfam	PF01556	DnaJ_C	251	352	5.7e-28	IPR002939	Chaperone DnaJ, C-terminal;Biological Process: protein folding (GO:0006457), Molecular Function: unfolded protein binding (GO:0051082
AT3G44750	AT3G44750.2	242	HMMPfam	PF03066	Nucleoplasmin	3	165	5e-05	IPR004301	Nucleoplasmin;Molecular Function: nucleic acid binding (GO:0003676
AT3G44990	AT3G44990.1	293	HMMPfam	PF00722	Glyco_hydro_16	40	222	9.40000000000003e-53	IPR000757	Glycoside hydrolase, family 16;Molecular Function: hydrolase activity, hydrolyzing O-glycosyl compounds (GO:0004553), Biological Process: carbohydrate metabolic process (GO:0005975
AT3G44990	AT3G44990.1	293	HMMPfam	PF06955	XET_C	253	293	2e-09	IPR010713	Xyloglucan endo-transglycosylase, C-terminal;Cellular Component: cell wall (GO:0005618), Biological Process: cellular glucan metabolic process (GO:0006073), Molecular Function: xyloglucan:xyloglucosyl transferase activity (GO:0016762), Cellular Component: apoplast (GO:0048046
AT3G46100	AT3G46100.1	486	HMMPfam	PF00587	tRNA-synt_2b	85	244	9.9e-21	IPR002314	Aminoacyl-tRNA synthetase, class II (G/ H/ P/ S), conserved domain;Molecular Function: nucleotide binding (GO:0000166), Molecular Function: aminoacyl-tRNA ligase activity (GO:0004812), Molecular Function: ATP binding (GO:0005524), Cellular Component: cytoplasm (GO:0005737), Biological Process: translation (GO:0006412), Biological Process: tRNA aminoacylation for protein translation (GO:0006418
AT3G46100	AT3G46100.1	486	HMMPfam	PF03129	HGTP_anticodon	405	485	9.20000000000002e-07	IPR004154	Anticodon-binding;Molecular Function: aminoacyl-tRNA ligase activity (GO:0004812), Molecular Function: ATP binding (GO:0005524), Biological Process: translation (GO:0006412
AT3G47800	AT3G47800.1	358	HMMPfam	PF01263	Aldose_epim	33	353	2.39999999999997e-93	IPR008183	Aldose 1-epimerase;Biological Process: carbohydrate metabolic process (GO:0005975), Molecular Function: isomerase activity (GO:0016853
AT3G49430	AT3G49430.1;AT3G49430.2;AT3G49430.3	300;297	HMMPfam	PF00076	RRM_1	9	76	1.3e-14	IPR000504	RNA recognition motif, RNP-1;Molecular Function: nucleic acid binding (GO:0003676
AT3G49430	AT3G49430.1;AT3G49430.2;AT3G49430.3	300;297	HMMPfam	PF00076	RRM_1	124	186	1.9e-08;1.8e-08	IPR000504	RNA recognition motif, RNP-1;Molecular Function: nucleic acid binding (GO:0003676
AT3G50670	AT3G50670.1	427	HMMPfam	PF00076	RRM_1	140	209	9.1e-18	IPR000504	RNA recognition motif, RNP-1;Molecular Function: nucleic acid binding (GO:0003676
AT3G50670	AT3G50670.2;AT3G50670.1	204;427	HMMPfam	PF12220	U1snRNP70_N	39	130	1.2e-19;6.9e-22	IPR022023	U1 small nuclear ribonucleoprotein of 70kDa MW N-termina
AT3G52500	AT3G52500.1	469	HMMPfam	PF00026	Asp	90	151	0.0068	IPR001461	Peptidase A1;Molecular Function: aspartic-type endopeptidase activity (GO:0004190), Biological Process: proteolysis (GO:0006508
AT3G52500	AT3G52500.1	469	HMMPfam	PF00026	Asp	187	464	4.20000000000001e-06	IPR001461	Peptidase A1;Molecular Function: aspartic-type endopeptidase activity (GO:0004190), Biological Process: proteolysis (GO:0006508
AT3G53430	AT3G53430.1	166	HMMPfam	PF00298	Ribosomal_L11	75	144	5.1e-13	IPR020783	Ribosomal protein L11, C-terminal domain;Molecular Function: structural constituent of ribosome (GO:0003735), Cellular Component: ribosome (GO:0005840), Biological Process: translation (GO:0006412
AT3G53430	AT3G53430.1	166	HMMPfam	PF03946	Ribosomal_L11_N	13	70	1.5e-16	IPR020784	Ribosomal protein L11, N-terminal domai
AT3G53460	AT3G53460.4	363	HMMPfam	PF00076	RRM_1	101	163	1.5e-16	IPR000504	RNA recognition motif, RNP-1;Molecular Function: nucleic acid binding (GO:0003676
AT3G53460	AT3G53460.3;AT3G53460.2;AT3G53460.1	342	HMMPfam	PF00076	RRM_1	101	171	1.4e-19	IPR000504	RNA recognition motif, RNP-1;Molecular Function: nucleic acid binding (GO:0003676
AT3G53460	AT3G53460.3;AT3G53460.2;AT3G53460.1	342	HMMPfam	PF00076	RRM_1	259	329	2.8e-20	IPR000504	RNA recognition motif, RNP-1;Molecular Function: nucleic acid binding (GO:0003676
AT3G53460	AT3G53460.4	363	HMMPfam	PF00076	RRM_1	280	350	3.1e-20	IPR000504	RNA recognition motif, RNP-1;Molecular Function: nucleic acid binding (GO:0003676
AT3G54090	AT3G54090.1	471	HMMPfam	PF00294	PfkB	134	449	1.6e-28	IPR011611	Carbohydrate/purine kinas
AT3G55220	AT3G55220.1	1214	HMMPfam	PF03178	CPSF_A	861	1180	4.49999999999996e-94	IPR004871	Cleavage/polyadenylation specificity factor, A subunit, C-terminal;Molecular Function: nucleic acid binding (GO:0003676), Cellular Component: nucleus (GO:0005634
AT3G55430	AT3G55430.1	449	HMMPfam	PF00332	Glyco_hydro_17	29	341	2.90000000000003e-77	IPR000490	Glycoside hydrolase, family 17;Molecular Function: hydrolase activity, hydrolyzing O-glycosyl compounds (GO:0004553), Biological Process: carbohydrate metabolic process (GO:0005975
AT3G55430	AT3G55430.1	449	HMMPfam	PF07983	X8	365	449	3.09999999999998e-28	IPR012946	X
AT3G60190	AT3G60190.1	624	HMMPfam	PF00350	Dynamin_N	43	219	2.19999999999997e-52	IPR001401	Dynamin, GTPase domain;Molecular Function: GTPase activity (GO:0003924), Molecular Function: GTP binding (GO:0005525
AT3G60190	AT3G60190.1	624	HMMPfam	PF01031	Dynamin_M	228	501	4.09999999999995e-67	IPR000375	Dynamin central region;Molecular Function: GTP binding (GO:0005525
AT3G60190	AT3G60190.1	624	HMMPfam	PF02212	GED	531	620	2.8e-17	IPR003130	Dynamin GTPase effector;Molecular Function: GTPase activity (GO:0003924), Molecular Function: GTP binding (GO:0005525
AT3G60830	AT3G60830.1	363	HMMPfam	PF00022	Actin	2	363	5.69999999999998e-72	IPR004000	Actin/actin-like;Molecular Function: protein binding (GO:0005515
AT3G61240	AT3G61240.1;AT3G61240.2	498	HMMPfam	PF00270	DEAD	149	312	3.7e-45	IPR011545	DNA/RNA helicase, DEAD/DEAH box type, N-terminal;Molecular Function: nucleic acid binding (GO:0003676), Molecular Function: ATP binding (GO:0005524), Molecular Function: ATP-dependent helicase activity (GO:0008026
AT3G61240	AT3G61240.1;AT3G61240.2	498	HMMPfam	PF00271	Helicase_C	381	456	2.7e-22	IPR001650	DNA/RNA helicase, C-terminal;Molecular Function: nucleic acid binding (GO:0003676), Molecular Function: helicase activity (GO:0004386), Molecular Function: ATP binding (GO:0005524
AT3G62600	AT3G62600.1	346	HMMPfam	PF00226	DnaJ	27	88	4.40000000000001e-27	IPR001623	Heat shock protein DnaJ, N-terminal;Molecular Function: heat shock protein binding (GO:0031072
AT3G62600	AT3G62600.1	346	HMMPfam	PF01556	DnaJ_C	241	339	4.9e-27	IPR002939	Chaperone DnaJ, C-terminal;Biological Process: protein folding (GO:0006457), Molecular Function: unfolded protein binding (GO:0051082
AT3G62840	AT3G62840.2	108	HMMPfam	PF01423	LSM	30	103	3e-15	IPR001163	Like-Sm ribonucleoprotein (LSM) domai
AT3G62840	AT3G62840.1	109	HMMPfam	PF01423	LSM	31	104	3e-15	IPR001163	Like-Sm ribonucleoprotein (LSM) domai
AT4G01310	AT4G01310.1	262	HMMPfam	PF00281	Ribosomal_L5	79	135	2.80000000000001e-20	IPR020927	Ribosomal protein L5, N-terminal;Molecular Function: structural constituent of ribosome (GO:0003735), Cellular Component: intracellular (GO:0005622), Cellular Component: ribosome (GO:0005840), Biological Process: translation (GO:0006412
AT4G01310	AT4G01310.1	262	HMMPfam	PF00673	Ribosomal_L5_C	139	232	3.5e-32	IPR020928	Ribosomal protein L5, C-terminal;Molecular Function: structural constituent of ribosome (GO:0003735), Cellular Component: intracellular (GO:0005622), Cellular Component: ribosome (GO:0005840), Biological Process: translation (GO:0006412
AT4G02840	AT4G02840.1	116	HMMPfam	PF01423	LSM	6	70	4.2e-14	IPR001163	Like-Sm ribonucleoprotein (LSM) domai
AT4G02840	AT4G02840.2	126	HMMPfam	PF01423	LSM	40	80	3.4e-06	IPR001163	Like-Sm ribonucleoprotein (LSM) domai
AT4G05410	AT4G05410.1	504	HMMPfam	PF00400	WD40	159	189	4.5	IPR019781	WD40 repeat, subgrou
AT4G05410	AT4G05410.1	504	HMMPfam	PF00400	WD40	220	250	0.029	IPR019781	WD40 repeat, subgrou
AT4G05410	AT4G05410.1	504	HMMPfam	PF00400	WD40	255	292	1e-05	IPR019781	WD40 repeat, subgrou
AT4G05410	AT4G05410.1	504	HMMPfam	PF00400	WD40	342	372	280	IPR019781	WD40 repeat, subgrou
AT4G05410	AT4G05410.1	504	HMMPfam	PF00400	WD40	415	442	260	IPR019781	WD40 repeat, subgrou
AT4G05530	AT4G05530.1	254	HMMPfam	PF00106	adh_short	12	177	2.5e-21	IPR002198	Short-chain dehydrogenase/reductase SDR;Biological Process: metabolic process (GO:0008152), Molecular Function: oxidoreductase activity (GO:0016491
AT4G08350	AT4G08350.1	1041	HMMPfam	PF00467	KOW	480	505	3.8e-05	IPR005824	KO
AT4G08350	AT4G08350.1	1041	HMMPfam	PF03439	Spt5-NGN	183	265	8.5e-27	IPR005100	Transcription elongation factor Spt5, NGN domai
AT4G08950	AT4G08950.1	314	HMMPfam	PF04674	Phi_1	35	314	5.09999999999993e-126	IPR006766	Phosphate-induced protein
AT4G09040	AT4G09040.2	244	HMMPfam	PF00076	RRM_1	39	105	1.8e-10	IPR000504	RNA recognition motif, RNP-1;Molecular Function: nucleic acid binding (GO:0003676
AT4G09040	AT4G09040.1	304	HMMPfam	PF00076	RRM_1	99	165	2.7e-10	IPR000504	RNA recognition motif, RNP-1;Molecular Function: nucleic acid binding (GO:0003676
AT4G09040	AT4G09040.2	244	HMMPfam	PF00076	RRM_1	131	202	1.6e-11	IPR000504	RNA recognition motif, RNP-1;Molecular Function: nucleic acid binding (GO:0003676
AT4G09040	AT4G09040.1	304	HMMPfam	PF00076	RRM_1	191	262	2.4e-11	IPR000504	RNA recognition motif, RNP-1;Molecular Function: nucleic acid binding (GO:0003676
AT4G10750	AT4G10750.1	358	HMMPfam	PF03328	HpcH_HpaI	91	321	4.70000000000003e-61	IPR005000	HpcH/HpaI aldolase;Biological Process: cellular aromatic compound metabolic process (GO:0006725), Molecular Function: carbon-carbon lyase activity (GO:0016830
AT4G11380	AT4G11380.1	894	HMMPfam	PF01602	Adaptin_N	19	533	0	IPR002553	Clathrin/coatomer adaptor, adaptin-like, N-terminal;Molecular Function: protein binding (GO:0005515), Biological Process: intracellular protein transport (GO:0006886), Biological Process: vesicle-mediated transport (GO:0016192), Cellular Component: membrane coat (GO:0030117
AT4G11380	AT4G11380.2	916	HMMPfam	PF01602	Adaptin_N	47	555	5.9e-162	IPR002553	Clathrin/coatomer adaptor, adaptin-like, N-terminal;Molecular Function: protein binding (GO:0005515), Biological Process: intracellular protein transport (GO:0006886), Biological Process: vesicle-mediated transport (GO:0016192), Cellular Component: membrane coat (GO:0030117
AT4G11380	AT4G11380.1	894	HMMPfam	PF02883	Alpha_adaptinC2	666	766	1.5e-07	IPR008152	Clathrin adaptor, alpha/beta/gamma-adaptin, appendage, Ig-like subdomain;Molecular Function: protein binding (GO:0005515), Biological Process: intracellular protein transport (GO:0006886), Biological Process: vesicle-mediated transport (GO:0016192), Cellular Component: clathrin adaptor complex (GO:0030131
AT4G11380	AT4G11380.2	916	HMMPfam	PF02883	Alpha_adaptinC2	688	788	2e-10	IPR008152	Clathrin adaptor, alpha/beta/gamma-adaptin, appendage, Ig-like subdomain;Molecular Function: protein binding (GO:0005515), Biological Process: intracellular protein transport (GO:0006886), Biological Process: vesicle-mediated transport (GO:0016192), Cellular Component: clathrin adaptor complex (GO:0030131
AT4G11380	AT4G11380.1	894	HMMPfam	PF09066	B2-adapt-app_C	782	893	3.7e-26	IPR015151	Clathrin adaptor, beta-adaptin, appendage, C-terminal subdomain;Molecular Function: protein binding (GO:0005515), Biological Process: intracellular protein transport (GO:0006886), Biological Process: vesicle-mediated transport (GO:0016192), Cellular Component: clathrin adaptor complex (GO:0030131
AT4G11380	AT4G11380.2	916	HMMPfam	PF09066	B2-adapt-app_C	804	915	4.8e-29	IPR015151	Clathrin adaptor, beta-adaptin, appendage, C-terminal subdomain;Molecular Function: protein binding (GO:0005515), Biological Process: intracellular protein transport (GO:0006886), Biological Process: vesicle-mediated transport (GO:0016192), Cellular Component: clathrin adaptor complex (GO:0030131
AT4G13340	AT4G13340.1	760	HMMPfam	PF08263	LRRNT_2	72	105	0.00089	IPR013210	Leucine-rich repeat-containing N-terminal domain, type
AT4G15900	AT4G15900.1	486	HMMPfam	PF00400	WD40	166	204	3.6e-12	IPR019781	WD40 repeat, subgrou
AT4G15900	AT4G15900.1	486	HMMPfam	PF00400	WD40	209	246	1.4e-05	IPR019781	WD40 repeat, subgrou
AT4G15900	AT4G15900.1	486	HMMPfam	PF00400	WD40	251	288	1.9e-08	IPR019781	WD40 repeat, subgrou
AT4G15900	AT4G15900.1	486	HMMPfam	PF00400	WD40	297	330	6.7e-07	IPR019781	WD40 repeat, subgrou
AT4G15900	AT4G15900.1	486	HMMPfam	PF00400	WD40	335	367	0.00028	IPR019781	WD40 repeat, subgrou
AT4G15900	AT4G15900.1	486	HMMPfam	PF00400	WD40	389	413	1.2	IPR019781	WD40 repeat, subgrou
AT4G15900	AT4G15900.1	486	HMMPfam	PF00400	WD40	435	463	0.012	IPR019781	WD40 repeat, subgrou
AT4G21660	AT4G21660.1	584	HMMPfam	PF04037	DUF382	173	300	4.10000000000004e-58	IPR007180	Protein of unknown function DUF382;Cellular Component: nucleus (GO:0005634), Biological Process: mRNA processing (GO:0006397
AT4G21660	AT4G21660.2	598	HMMPfam	PF04037	DUF382	173	314	1.3e-53	IPR007180	Protein of unknown function DUF382;Cellular Component: nucleus (GO:0005634), Biological Process: mRNA processing (GO:0006397
AT4G21660	AT4G21660.1	584	HMMPfam	PF04046	PSP	308	355	6.19999999999999e-20	IPR006568	PSP, proline-ric
AT4G21660	AT4G21660.2	598	HMMPfam	PF04046	PSP	322	369	8e-23	IPR006568	PSP, proline-ric
AT4G22010	AT4G22010.1	541	HMMPfam	PF00394	Cu-oxidase	159	294	2.70000000000002e-38	IPR001117	Multicopper oxidase, type 1;Molecular Function: oxidoreductase activity (GO:0016491), Biological Process: oxidation reduction (GO:0055114
AT4G22010	AT4G22010.1	541	HMMPfam	PF07731	Cu-oxidase_2	386	513	3.90000000000001e-23	IPR011706	Multicopper oxidase, type 2;Molecular Function: copper ion binding (GO:0005507), Molecular Function: oxidoreductase activity (GO:0016491), Biological Process: oxidation reduction (GO:0055114
AT4G22010	AT4G22010.1	541	HMMPfam	PF07732	Cu-oxidase_3	32	145	1.8e-32	IPR011707	Multicopper oxidase, type 3;Molecular Function: copper ion binding (GO:0005507), Molecular Function: oxidoreductase activity (GO:0016491), Biological Process: oxidation reduction (GO:0055114
AT4G24270	AT4G24270.1;AT4G24270.2	816;817	HMMPfam	PF00076	RRM_1	654	721	9e-09;9.10000000000001e-09	IPR000504	RNA recognition motif, RNP-1;Molecular Function: nucleic acid binding (GO:0003676
AT4G24270	AT4G24270.1	816	HMMPfam	PF05391	Lsm_interact	795	815	1.9e-05	IPR008669	Lsm interactio
AT4G24270	AT4G24270.2	817	HMMPfam	PF05391	Lsm_interact	796	816	1.9e-05	IPR008669	Lsm interactio
AT4G24350	AT4G24350.2	242	HMMPfam	PF01048	PNP_UDP_1	10	237	1.8e-35	IPR000845	Nucleoside phosphorylase;Molecular Function: catalytic activity (GO:0003824), Biological Process: nucleoside metabolic process (GO:0009116
AT4G24350	AT4G24350.1	336	HMMPfam	PF01048	PNP_UDP_1	48	331	3.40000000000004e-44	IPR000845	Nucleoside phosphorylase;Molecular Function: catalytic activity (GO:0003824), Biological Process: nucleoside metabolic process (GO:0009116
AT4G24770	AT4G24770.1	329	HMMPfam	PF00076	RRM_1	152	221	1.9e-19	IPR000504	RNA recognition motif, RNP-1;Molecular Function: nucleic acid binding (GO:0003676
AT4G24770	AT4G24770.1	329	HMMPfam	PF00076	RRM_1	246	316	6.7e-23	IPR000504	RNA recognition motif, RNP-1;Molecular Function: nucleic acid binding (GO:0003676
AT4G24780	AT4G24780.1;AT4G24780.2	408	HMMPfam	PF00544	Pec_lyase_C	130	325	6.5e-64	IPR002022	Pectate lyase/Amb allerge
AT4G26100	AT4G26100.1	450	HMMPfam	PF00069	Pkinase	9	244	7.4e-38	IPR017442	Serine/threonine-protein kinase-like domain;Molecular Function: protein kinase activity (GO:0004672), Molecular Function: ATP binding (GO:0005524), Biological Process: protein amino acid phosphorylation (GO:0006468
AT4G26110	AT4G26110.1;AT4G26110.2	372;359	HMMPfam	PF00956	NAP	52	299	7.90000000000016e-81;7.09999999999991e-81	IPR002164	Nucleosome assembly protein (NAP);Cellular Component: nucleus (GO:0005634), Biological Process: nucleosome assembly (GO:0006334
AT4G26370	AT4G26370.1	301	HMMPfam	PF01029	NusB	170	282	4.40000000000001e-09	IPR006027	NusB/RsmB/TIM44;Molecular Function: RNA binding (GO:0003723), Biological Process: regulation of transcription, DNA-dependent (GO:0006355
AT4G26630	AT4G26630.1;AT4G26630.2	763	HMMPfam	PF08766	DEK_C	678	731	3.1e-10	IPR014876	DEK, C-termina
AT4G27170	AT4G27170.1	166	HMMPfam	PF00234	Tryp_alpha_amyl	58	155	1.5e-05	IPR003612	Plant lipid transfer protein/seed storage/trypsin-alpha amylase inhibito
AT4G28480	AT4G28480.1;AT4G28480.2	348;290	HMMPfam	PF00226	DnaJ	4	67	2.3e-25;1.69999999999999e-25	IPR001623	Heat shock protein DnaJ, N-terminal;Molecular Function: heat shock protein binding (GO:0031072
AT4G28480	AT4G28480.2	290	HMMPfam	PF01556	DnaJ_C	185	283	3.09999999999998e-26	IPR002939	Chaperone DnaJ, C-terminal;Biological Process: protein folding (GO:0006457), Molecular Function: unfolded protein binding (GO:0051082
AT4G28480	AT4G28480.1	348	HMMPfam	PF01556	DnaJ_C	243	340	4.5e-26	IPR002939	Chaperone DnaJ, C-terminal;Biological Process: protein folding (GO:0006457), Molecular Function: unfolded protein binding (GO:0051082
AT4G28520	AT4G28520.1;AT4G28520.4;AT4G28520.2;AT4G28520.3	524;396;394;453	HMMPfam	PF00190	Cupin_1	45	253	1.99999999999999e-41;9.60000000000004e-43;1.3e-45;1.8e-44	IPR006045	Cupin 1;Molecular Function: nutrient reservoir activity (GO:0045735
AT4G28520	AT4G28520.3	453	HMMPfam	PF00190	Cupin_1	285	423	3.7e-26	IPR006045	Cupin 1;Molecular Function: nutrient reservoir activity (GO:0045735
AT4G28520	AT4G28520.1	524	HMMPfam	PF00190	Cupin_1	347	494	3.2e-24	IPR006045	Cupin 1;Molecular Function: nutrient reservoir activity (GO:0045735
AT4G28880	AT4G28880.1	415	HMMPfam	PF00069	Pkinase	9	265	4.30000000000003e-34	IPR017442	Serine/threonine-protein kinase-like domain;Molecular Function: protein kinase activity (GO:0004672), Molecular Function: ATP binding (GO:0005524), Biological Process: protein amino acid phosphorylation (GO:0006468
AT4G30690	AT4G30690.2	253	HMMPfam	PF00707	IF3_C	140	220	2.7e-21	IPR019815	Translation initiation factor 3, C-terminal;Molecular Function: translation initiation factor activity (GO:0003743), Biological Process: translational initiation (GO:0006413
AT4G30690	AT4G30690.1	281	HMMPfam	PF00707	IF3_C	163	248	3.39999999999999e-21	IPR019815	Translation initiation factor 3, C-terminal;Molecular Function: translation initiation factor activity (GO:0003743), Biological Process: translational initiation (GO:0006413
AT4G30690	AT4G30690.2	253	HMMPfam	PF05198	IF3_N	89	143	2.3e-19	IPR019814	Translation initiation factor 3, N-terminal;Molecular Function: translation initiation factor activity (GO:0003743), Biological Process: translational initiation (GO:0006413
AT4G30690	AT4G30690.1	281	HMMPfam	PF05198	IF3_N	89	157	1.1e-24	IPR019814	Translation initiation factor 3, N-terminal;Molecular Function: translation initiation factor activity (GO:0003743), Biological Process: translational initiation (GO:0006413
AT4G31490	AT4G31490.1	948	HMMPfam	PF01602	Adaptin_N	19	465	6.99999999999989e-79	IPR002553	Clathrin/coatomer adaptor, adaptin-like, N-terminal;Molecular Function: protein binding (GO:0005515), Biological Process: intracellular protein transport (GO:0006886), Biological Process: vesicle-mediated transport (GO:0016192), Cellular Component: membrane coat (GO:0030117
AT4G31490	AT4G31490.1	948	HMMPfam	PF07718	Coatamer_beta_C	668	942	4.80000000000003e-117	IPR011710	Coatomer, beta subunit, C-terminal;Molecular Function: structural molecule activity (GO:0005198), Molecular Function: protein binding (GO:0005515), Biological Process: intracellular protein transport (GO:0006886), Biological Process: vesicle-mediated transport (GO:0016192), Cellular Component: COPI vesicle coat (GO:0030126
AT4G32460	AT4G32460.1;AT4G32460.2	365	HMMPfam	PF04862	DUF642	41	361	0	IPR006946	Protein of unknown function DUF64
AT4G32720	AT4G32720.1;AT4G32720.2	433;404	HMMPfam	PF00076	RRM_1	123	185	1.9e-07;1.7e-07	IPR000504	RNA recognition motif, RNP-1;Molecular Function: nucleic acid binding (GO:0003676
AT4G32720	AT4G32720.1;AT4G32720.2	433;404	HMMPfam	PF05383	La	14	85	1.69999999999999e-19;1.6e-19	IPR006630	RNA-binding protein Lupus L
AT4G32720	AT4G32720.2	404	HMMPfam	PF08777	RRM_3	302	392	1.5e-22	IPR014886	RNA-binding moti
AT4G32720	AT4G32720.1	433	HMMPfam	PF08777	RRM_3	302	393	1.1e-22	IPR014886	RNA-binding moti
AT4G34110	AT4G34110.1	629	HMMPfam	PF00076	RRM_1	38	108	5e-16	IPR000504	RNA recognition motif, RNP-1;Molecular Function: nucleic acid binding (GO:0003676
AT4G34110	AT4G34110.1	629	HMMPfam	PF00076	RRM_1	126	194	3.5e-19	IPR000504	RNA recognition motif, RNP-1;Molecular Function: nucleic acid binding (GO:0003676
AT4G34110	AT4G34110.1	629	HMMPfam	PF00076	RRM_1	217	285	6.90000000000001e-22	IPR000504	RNA recognition motif, RNP-1;Molecular Function: nucleic acid binding (GO:0003676
AT4G34110	AT4G34110.1	629	HMMPfam	PF00076	RRM_1	320	388	8.70000000000003e-19	IPR000504	RNA recognition motif, RNP-1;Molecular Function: nucleic acid binding (GO:0003676
AT4G34110	AT4G34110.1	629	HMMPfam	PF00658	PABP	543	611	1.9e-25	IPR002004	Polyadenylate-binding protein/Hyperplastic disc protein;Molecular Function: RNA binding (GO:0003723
AT4G34450	AT4G34450.1	886	HMMPfam	PF01602	Adaptin_N	26	540	7.4e-122	IPR002553	Clathrin/coatomer adaptor, adaptin-like, N-terminal;Molecular Function: protein binding (GO:0005515), Biological Process: intracellular protein transport (GO:0006886), Biological Process: vesicle-mediated transport (GO:0016192), Cellular Component: membrane coat (GO:0030117
AT4G34450	AT4G34450.1	886	HMMPfam	PF08752	Gamma-COP	622	883	3.4e-91	IPR014863	Coatomer, gamma subunit , appendage;Molecular Function: structural molecule activity (GO:0005198), Molecular Function: protein binding (GO:0005515), Cellular Component: Golgi-associated vesicle (GO:0005798), Biological Process: intracellular protein transport (GO:0006886), Biological Process: vesicle-mediated transport (GO:0016192
AT4G35570	AT4G35570.1	125	HMMPfam	PF00505	HMG_box	34	103	3.09999999999998e-17	IPR000910	High mobility group, HMG1/HMG2;Molecular Function: DNA binding (GO:0003677), Cellular Component: nucleus (GO:0005634
AT4G38020	AT4G38020.1	352	HMMPfam	PF00588	SpoU_methylase	198	346	2.1e-29	IPR001537	tRNA/rRNA methyltransferase, SpoU;Molecular Function: RNA binding (GO:0003723), Biological Process: RNA processing (GO:0006396), Molecular Function: RNA methyltransferase activity (GO:0008173
AT4G39100	AT4G39100.1	228	HMMPfam	PF00628	PHD	141	189	1.3e-08	IPR019787	Zinc finger, PHD-finge
AT4G39100	AT4G39100.1;AT4G39100.2	228;169	HMMPfam	PF01426	BAH	23	136	5.20000000000001e-21;2.8e-24	IPR001025	Bromo adjacent homology (BAH) domain;Molecular Function: DNA binding (GO:0003677
AT4G39640	AT4G39640.1;AT4G39640.2	572	HMMPfam	PF01019	G_glu_transpept	48	567	0	IPR000101	Gamma-glutamyltranspeptidase;Molecular Function: gamma-glutamyltransferase activity (GO:0003840
AT4G39960	AT4G39960.1	447	HMMPfam	PF00226	DnaJ	85	146	3.09999999999998e-24	IPR001623	Heat shock protein DnaJ, N-terminal;Molecular Function: heat shock protein binding (GO:0031072
AT4G39960	AT4G39960.1	447	HMMPfam	PF00684	DnaJ_CXXCXGXG	217	293	1.6e-15	IPR001305	Heat shock protein DnaJ, cysteine-rich domain;Biological Process: protein folding (GO:0006457), Molecular Function: heat shock protein binding (GO:0031072), Molecular Function: unfolded protein binding (GO:0051082
AT4G39960	AT4G39960.1	447	HMMPfam	PF01556	DnaJ_C	331	429	1.1e-24	IPR002939	Chaperone DnaJ, C-terminal;Biological Process: protein folding (GO:0006457), Molecular Function: unfolded protein binding (GO:0051082
AT5G02530	AT5G02530.1;AT5G02530.2	292;290	HMMPfam	PF00076	RRM_1	110	178	4.9e-11;4.80000000000001e-11	IPR000504	RNA recognition motif, RNP-1;Molecular Function: nucleic acid binding (GO:0003676
AT5G04280	AT5G04280.1	310	HMMPfam	PF00076	RRM_1	9	78	7.4e-19	IPR000504	RNA recognition motif, RNP-1;Molecular Function: nucleic acid binding (GO:0003676
AT5G04280	AT5G04280.1	310	HMMPfam	PF00098	zf-CCHC	127	143	2.2e-05	IPR001878	Zinc finger, CCHC-type;Molecular Function: nucleic acid binding (GO:0003676), Molecular Function: zinc ion binding (GO:0008270
AT5G05470	AT5G05470.1	344	HMMPfam	PF00575	S1	28	92	2.2e-10	IPR003029	Ribosomal protein S1, RNA-binding domain;Molecular Function: RNA binding (GO:0003723
AT5G05470	AT5G05470.1	344	HMMPfam	PF07541	EIF_2_alpha	129	259	6.19999999999994e-43	IPR011488	Eukaryotic translation initiation factor 2, alpha subunit;Molecular Function: RNA binding (GO:0003723), Molecular Function: translation initiation factor activity (GO:0003743), Cellular Component: eukaryotic translation initiation factor 2 complex (GO:0005850), Biological Process: translation (GO:0006412
AT5G07030	AT5G07030.1	455	HMMPfam	PF00026	Asp	115	450	4.7e-18	IPR001461	Peptidase A1;Molecular Function: aspartic-type endopeptidase activity (GO:0004190), Biological Process: proteolysis (GO:0006508
AT5G08610	AT5G08610.1	850	HMMPfam	PF00270	DEAD	407	584	3.60000000000002e-43	IPR011545	DNA/RNA helicase, DEAD/DEAH box type, N-terminal;Molecular Function: nucleic acid binding (GO:0003676), Molecular Function: ATP binding (GO:0005524), Molecular Function: ATP-dependent helicase activity (GO:0008026
AT5G08610	AT5G08610.1	850	HMMPfam	PF00271	Helicase_C	659	735	2.1e-17	IPR001650	DNA/RNA helicase, C-terminal;Molecular Function: nucleic acid binding (GO:0003676), Molecular Function: helicase activity (GO:0004386), Molecular Function: ATP binding (GO:0005524
AT5G09440	AT5G09440.1	278	HMMPfam	PF04674	Phi_1	31	278	8.70000000000003e-101	IPR006766	Phosphate-induced protein
AT5G10160	AT5G10160.1	219	HMMPfam	PF07977	FabA	84	209	8.20000000000006e-35	IPR013114	Beta-hydroxyacyl-(acyl-carrier-protein) dehydratase, FabA/Fab
AT5G11420	AT5G11420.1	366	HMMPfam	PF04862	DUF642	42	362	0	IPR006946	Protein of unknown function DUF64
AT5G11480	AT5G11480.1	318	HMMPfam	PF01926	MMR_HSR1	147	255	1e-13	IPR002917	GTP-binding protein, HSR1-related;Molecular Function: GTP binding (GO:0005525), Cellular Component: intracellular (GO:0005622
AT5G13510	AT5G13510.1	220	HMMPfam	PF00466	Ribosomal_L10	45	140	7.8e-23	IPR001790	Ribosomal protein L10;Cellular Component: intracellular (GO:0005622), Biological Process: ribosome biogenesis (GO:0042254
AT5G13780	AT5G13780.1	192	HMMPfam	PF00583	Acetyltransf_1	49	129	4.9e-12	IPR022610	GCN5-related N-acetyltransferase, C-termina
AT5G14170	AT5G14170.1	534	HMMPfam	PF02201	SWIB	316	389	7.79999999999999e-18	IPR003121	SWIB/MDM2 domai
AT5G14320	AT5G14320.2	128	HMMPfam	PF00416	Ribosomal_S13	49	115	1.4e-11	IPR001892	Ribosomal protein S13;Molecular Function: RNA binding (GO:0003723), Molecular Function: structural constituent of ribosome (GO:0003735), Cellular Component: intracellular (GO:0005622), Cellular Component: ribosome (GO:0005840), Biological Process: translation (GO:0006412
AT5G14320	AT5G14320.1	169	HMMPfam	PF00416	Ribosomal_S13	49	153	1e-36	IPR001892	Ribosomal protein S13;Molecular Function: RNA binding (GO:0003723), Molecular Function: structural constituent of ribosome (GO:0003735), Cellular Component: intracellular (GO:0005622), Cellular Component: ribosome (GO:0005840), Biological Process: translation (GO:0006412
AT5G14460	AT5G14460.1	540	HMMPfam	PF01509	TruB_N	342	492	2.70000000000002e-50	IPR002501	Pseudouridine synthase II, TruB, N-terminal;Biological Process: RNA processing (GO:0006396
AT5G14660	AT5G14660.1;AT5G14660.2	273	HMMPfam	PF01327	Pep_deformylase	81	230	2.4e-47	IPR000181	Formylmethionine deformylase;Molecular Function: iron ion binding (GO:0005506), Biological Process: translation (GO:0006412), Molecular Function: peptide deformylase activity (GO:0042586
AT5G14920	AT5G14920.1	275	HMMPfam	PF02704	GASA	212	275	1.6e-20	IPR003854	Gibberellin regulated protei
AT5G20290	AT5G20290.1	222	HMMPfam	PF01201	Ribosomal_S8e	1	201	6.80000000000006e-49	IPR022309	Ribosomal protein S8e/ribosomal biogenesis NSA2
AT5G20920	AT5G20920.2	267	HMMPfam	PF01873	eIF-5_eIF-2B	130	249	8.79999999999995e-45	IPR002735	Translation initiation factor IF2/IF5;Molecular Function: translation initiation factor activity (GO:0003743), Biological Process: translational initiation (GO:0006413
AT5G20920	AT5G20920.1;AT5G20920.3	268	HMMPfam	PF01873	eIF-5_eIF-2B	131	250	1.1e-47	IPR002735	Translation initiation factor IF2/IF5;Molecular Function: translation initiation factor activity (GO:0003743), Biological Process: translational initiation (GO:0006413
AT5G20950	AT5G20950.1;AT5G20950.2	624	HMMPfam	PF00933	Glyco_hydro_3	103	337	8.49999999999995e-67	IPR001764	Glycoside hydrolase, family 3, N-terminal;Molecular Function: hydrolase activity, hydrolyzing O-glycosyl compounds (GO:0004553), Biological Process: carbohydrate metabolic process (GO:0005975
AT5G20950	AT5G20950.1;AT5G20950.2	624	HMMPfam	PF01915	Glyco_hydro_3_C	409	619	5.19999999999996e-40	IPR002772	Glycoside hydrolase, family 3, C-terminal;Molecular Function: hydrolase activity, hydrolyzing O-glycosyl compounds (GO:0004553), Biological Process: carbohydrate metabolic process (GO:0005975
AT5G21105	AT5G21105.2	397	HMMPfam	PF00394	Cu-oxidase	11	144	2.4e-40	IPR001117	Multicopper oxidase, type 1;Molecular Function: oxidoreductase activity (GO:0016491), Biological Process: oxidation reduction (GO:0055114
AT5G21105	AT5G21105.3;AT5G21105.1	543;588	HMMPfam	PF00394	Cu-oxidase	171	335	3.6e-48;4.2e-48	IPR001117	Multicopper oxidase, type 1;Molecular Function: oxidoreductase activity (GO:0016491), Biological Process: oxidation reduction (GO:0055114
AT5G21105	AT5G21105.2	397	HMMPfam	PF07731	Cu-oxidase_2	244	369	9e-38	IPR011706	Multicopper oxidase, type 2;Molecular Function: copper ion binding (GO:0005507), Molecular Function: oxidoreductase activity (GO:0016491), Biological Process: oxidation reduction (GO:0055114
AT5G21105	AT5G21105.3	543	HMMPfam	PF07731	Cu-oxidase_2	435	539	2.3e-23	IPR011706	Multicopper oxidase, type 2;Molecular Function: copper ion binding (GO:0005507), Molecular Function: oxidoreductase activity (GO:0016491), Biological Process: oxidation reduction (GO:0055114
AT5G21105	AT5G21105.1	588	HMMPfam	PF07731	Cu-oxidase_2	435	560	1.9e-37	IPR011706	Multicopper oxidase, type 2;Molecular Function: copper ion binding (GO:0005507), Molecular Function: oxidoreductase activity (GO:0016491), Biological Process: oxidation reduction (GO:0055114
AT5G21105	AT5G21105.3;AT5G21105.1	543;588	HMMPfam	PF07732	Cu-oxidase_3	44	157	2.3e-43;2.6e-43	IPR011707	Multicopper oxidase, type 3;Molecular Function: copper ion binding (GO:0005507), Molecular Function: oxidoreductase activity (GO:0016491), Biological Process: oxidation reduction (GO:0055114
AT5G22060	AT5G22060.1	419	HMMPfam	PF00226	DnaJ	15	72	9.5e-24	IPR001623	Heat shock protein DnaJ, N-terminal;Molecular Function: heat shock protein binding (GO:0031072
AT5G22060	AT5G22060.1	419	HMMPfam	PF00684	DnaJ_CXXCXGXG	136	215	1.5e-17	IPR001305	Heat shock protein DnaJ, cysteine-rich domain;Biological Process: protein folding (GO:0006457), Molecular Function: heat shock protein binding (GO:0031072), Molecular Function: unfolded protein binding (GO:0051082
AT5G22060	AT5G22060.1	419	HMMPfam	PF01556	DnaJ_C	252	353	1.1e-28	IPR002939	Chaperone DnaJ, C-terminal;Biological Process: protein folding (GO:0006457), Molecular Function: unfolded protein binding (GO:0051082
AT5G22330	AT5G22330.1	458	HMMPfam	PF06068	TIP49	17	417	0	IPR010339	TIP49, C-terminal;Molecular Function: DNA helicase activity (GO:0003678), Molecular Function: ATP binding (GO:0005524
AT5G22830	AT5G22830.1	459	HMMPfam	PF01544	CorA	341	451	0.00065	IPR002523	Mg2+ transporter protein, CorA-like;Cellular Component: membrane (GO:0016020), Biological Process: metal ion transport (GO:0030001), Molecular Function: metal ion transmembrane transporter activity (GO:0046873), Biological Process: transmembrane transport (GO:0055085
AT5G23600	AT5G23600.1	212	HMMPfam	PF01885	PTS_2-RNA	7	191	9.20000000000001e-55	IPR002745	Phosphotransferase KptA/Tpt1;Biological Process: tRNA splicing, via endonucleolytic cleavage and ligation (GO:0006388), Molecular Function: transferase activity, transferring phosphorus-containing groups (GO:0016772
AT5G24710	AT5G24710.1	1377	HMMPfam	PF00400	WD40	255	294	0.36	IPR019781	WD40 repeat, subgrou
AT5G25460	AT5G25460.1	369	HMMPfam	PF04862	DUF642	45	366	0	IPR006946	Protein of unknown function DUF64
AT5G25980	AT5G25980.1;AT5G25980.3	467	HMMPfam	PF00232	Glyco_hydro_1	52	466	1.10000000000001e-128	IPR001360	Glycoside hydrolase, family 1;Molecular Function: hydrolase activity, hydrolyzing O-glycosyl compounds (GO:0004553), Biological Process: carbohydrate metabolic process (GO:0005975
AT5G25980	AT5G25980.2	547	HMMPfam	PF00232	Glyco_hydro_1	52	525	2.4e-157	IPR001360	Glycoside hydrolase, family 1;Molecular Function: hydrolase activity, hydrolyzing O-glycosyl compounds (GO:0004553), Biological Process: carbohydrate metabolic process (GO:0005975
AT5G27120	AT5G27120.1	533	HMMPfam	PF01798	Nop	251	398	4.10000000000004e-59	IPR002687	Pre-mRNA processing ribonucleoprotein, snoRNA-binding domai
AT5G27120	AT5G27120.1	533	HMMPfam	PF08060	NOSIC	159	211	1.5e-25	IPR012976	NOSI
AT5G27120	AT5G27120.1	533	HMMPfam	PF08156	NOP5NT	1	66	2.1e-18	IPR012974	NOP5, N-termina
AT5G27770	AT5G27770.1	124	HMMPfam	PF01776	Ribosomal_L22e	12	123	9e-48	IPR002671	Ribosomal protein L22e;Molecular Function: structural constituent of ribosome (GO:0003735), Cellular Component: intracellular (GO:0005622), Cellular Component: ribosome (GO:0005840), Biological Process: translation (GO:0006412
AT5G39940	AT5G39940.2	458	HMMPfam	PF03486	HI0933_like	47	454	2.2e-119	IPR004792	Conserved hypothetical protein CHP00275, flavoprotein HI0933-lik
AT5G39940	AT5G39940.1	480	HMMPfam	PF03486	HI0933_like	47	458	3.39999999999996e-122	IPR004792	Conserved hypothetical protein CHP00275, flavoprotein HI0933-lik
AT5G40490	AT5G40490.1	423	HMMPfam	PF00076	RRM_1	44	109	1.3e-13	IPR000504	RNA recognition motif, RNP-1;Molecular Function: nucleic acid binding (GO:0003676
AT5G40490	AT5G40490.1	423	HMMPfam	PF00076	RRM_1	132	201	7.29999999999999e-15	IPR000504	RNA recognition motif, RNP-1;Molecular Function: nucleic acid binding (GO:0003676
AT5G41770	AT5G41770.1	705	HMMPfam	PF02184	HAT	208	236	9.8e-13	IPR003107	RNA-processing protein, HAT helix;Cellular Component: intracellular (GO:0005622), Biological Process: RNA processing (GO:0006396
AT5G42020	AT5G42020.2	613	HMMPfam	PF00012	HSP70	37	510	0	IPR013126	Heat shock protein 7
AT5G42020	AT5G42020.1	668	HMMPfam	PF00012	HSP70	37	644	4.7e-270	IPR013126	Heat shock protein 7
AT5G42080	AT5G42080.2;AT5G42080.1;AT5G42080.3	429;610;604	HMMPfam	PF00350	Dynamin_N	37	213	1.40000000000001e-52;3.6e-55;3.5e-55	IPR001401	Dynamin, GTPase domain;Molecular Function: GTPase activity (GO:0003924), Molecular Function: GTP binding (GO:0005525
AT5G42080	AT5G42080.2	429	HMMPfam	PF01031	Dynamin_M	222	429	1.29999999999998e-53	IPR000375	Dynamin central region;Molecular Function: GTP binding (GO:0005525
AT5G42080	AT5G42080.3	604	HMMPfam	PF01031	Dynamin_M	222	491	9.4e-65	IPR000375	Dynamin central region;Molecular Function: GTP binding (GO:0005525
AT5G42080	AT5G42080.1	610	HMMPfam	PF01031	Dynamin_M	222	497	1.9e-70	IPR000375	Dynamin central region;Molecular Function: GTP binding (GO:0005525
AT5G42080	AT5G42080.3	604	HMMPfam	PF02212	GED	509	600	4e-20	IPR003130	Dynamin GTPase effector;Molecular Function: GTPase activity (GO:0003924), Molecular Function: GTP binding (GO:0005525
AT5G42080	AT5G42080.1	610	HMMPfam	PF02212	GED	515	606	4.1e-20	IPR003130	Dynamin GTPase effector;Molecular Function: GTPase activity (GO:0003924), Molecular Function: GTP binding (GO:0005525
AT5G44120	AT5G44120.2	368	HMMPfam	PF00190	Cupin_1	2	95	8.89999999999994e-21	IPR006045	Cupin 1;Molecular Function: nutrient reservoir activity (GO:0045735
AT5G44120	AT5G44120.3	472	HMMPfam	PF00190	Cupin_1	41	199	4.4e-47	IPR006045	Cupin 1;Molecular Function: nutrient reservoir activity (GO:0045735
AT5G44120	AT5G44120.1	285	HMMPfam	PF00190	Cupin_1	109	256	4.8e-28	IPR006045	Cupin 1;Molecular Function: nutrient reservoir activity (GO:0045735
AT5G44120	AT5G44120.2	368	HMMPfam	PF00190	Cupin_1	192	339	7.1e-25	IPR006045	Cupin 1;Molecular Function: nutrient reservoir activity (GO:0045735
AT5G44120	AT5G44120.3	472	HMMPfam	PF00190	Cupin_1	296	443	1.5e-27	IPR006045	Cupin 1;Molecular Function: nutrient reservoir activity (GO:0045735
AT5G44400	AT5G44400.1	537	HMMPfam	PF01565	FAD_binding_4	85	223	1.9e-22	IPR006094	FAD linked oxidase, N-terminal;Molecular Function: oxidoreductase activity (GO:0016491), Molecular Function: FAD binding (GO:0050660
AT5G44400	AT5G44400.1	537	HMMPfam	PF08031	BBE	476	534	7.4e-21	IPR012951	Berberine/berberine-like;Molecular Function: oxidoreductase activity (GO:0016491), Molecular Function: FAD binding (GO:0050660
AT5G44500	AT5G44500.1;AT5G44500.2	254	HMMPfam	PF01423	LSM	11	84	1.3e-13	IPR001163	Like-Sm ribonucleoprotein (LSM) domai
AT5G47500	AT5G47500.1	362	HMMPfam	PF01095	Pectinesterase	61	353	5.00000000000001e-60	IPR000070	Pectinesterase, catalytic;Cellular Component: cell wall (GO:0005618), Molecular Function: pectinesterase activity (GO:0030599), Biological Process: cell wall modification (GO:0042545
AT5G48030	AT5G48030.1	456	HMMPfam	PF00226	DnaJ	94	156	1.69999999999999e-22	IPR001623	Heat shock protein DnaJ, N-terminal;Molecular Function: heat shock protein binding (GO:0031072
AT5G48030	AT5G48030.1	456	HMMPfam	PF00684	DnaJ_CXXCXGXG	225	297	1.1e-10	IPR001305	Heat shock protein DnaJ, cysteine-rich domain;Biological Process: protein folding (GO:0006457), Molecular Function: heat shock protein binding (GO:0031072), Molecular Function: unfolded protein binding (GO:0051082
AT5G48030	AT5G48030.1	456	HMMPfam	PF01556	DnaJ_C	336	434	3.8e-28	IPR002939	Chaperone DnaJ, C-terminal;Biological Process: protein folding (GO:0006457), Molecular Function: unfolded protein binding (GO:0051082
AT5G48540	AT5G48540.1	263	HMMPfam	PF01657	DUF26	74	126	9.20000000000002e-17	IPR002902	Protein of unknown function DUF2
AT5G48540	AT5G48540.1	263	HMMPfam	PF01657	DUF26	189	240	7.1e-15	IPR002902	Protein of unknown function DUF2
AT5G49720	AT5G49720.1	621	HMMPfam	PF00759	Glyco_hydro_9	108	583	0	IPR001701	Glycoside hydrolase, family 9;Molecular Function: hydrolase activity, hydrolyzing O-glycosyl compounds (GO:0004553), Biological Process: carbohydrate metabolic process (GO:0005975
AT5G49910	AT5G49910.1	718	HMMPfam	PF00012	HSP70	80	674	0	IPR013126	Heat shock protein 7
AT5G51100	AT5G51100.1	305	HMMPfam	PF00081	Sod_Fe_N	53	136	5.30000000000001e-24	IPR019831	Manganese/iron superoxide dismutase, N-terminal;Molecular Function: superoxide dismutase activity (GO:0004784), Biological Process: superoxide metabolic process (GO:0006801), Molecular Function: metal ion binding (GO:0046872), Biological Process: oxidation reduction (GO:0055114
AT5G51100	AT5G51100.1	305	HMMPfam	PF02777	Sod_Fe_C	142	194	1.4e-10	IPR019832	Manganese/iron superoxide dismutase, C-terminal;Molecular Function: superoxide dismutase activity (GO:0004784), Biological Process: superoxide metabolic process (GO:0006801), Molecular Function: metal ion binding (GO:0046872), Biological Process: oxidation reduction (GO:0055114
AT5G51100	AT5G51100.1	305	HMMPfam	PF02777	Sod_Fe_C	200	262	4.80000000000001e-17	IPR019832	Manganese/iron superoxide dismutase, C-terminal;Molecular Function: superoxide dismutase activity (GO:0004784), Biological Process: superoxide metabolic process (GO:0006801), Molecular Function: metal ion binding (GO:0046872), Biological Process: oxidation reduction (GO:0055114
AT5G52470	AT5G52470.2	273	HMMPfam	PF01269	Fibrillarin	71	226	5.99999999999995e-78	IPR000692	Fibrillarin;Molecular Function: RNA binding (GO:0003723), Biological Process: rRNA processing (GO:0006364), Biological Process: tRNA processing (GO:0008033), Molecular Function: methyltransferase activity (GO:0008168
AT5G52470	AT5G52470.1	308	HMMPfam	PF01269	Fibrillarin	71	298	4e-115	IPR000692	Fibrillarin;Molecular Function: RNA binding (GO:0003723), Biological Process: rRNA processing (GO:0006364), Biological Process: tRNA processing (GO:0008033), Molecular Function: methyltransferase activity (GO:0008168
AT5G53370	AT5G53370.1	587	HMMPfam	PF01095	Pectinesterase	273	570	0	IPR000070	Pectinesterase, catalytic;Cellular Component: cell wall (GO:0005618), Molecular Function: pectinesterase activity (GO:0030599), Biological Process: cell wall modification (GO:0042545
AT5G53370	AT5G53370.1	587	HMMPfam	PF04043	PMEI	72	223	2.1e-31	IPR006501	Pectinesterase inhibitor;Molecular Function: enzyme inhibitor activity (GO:0004857), Molecular Function: pectinesterase activity (GO:0030599
AT5G53580	AT5G53580.1	365	HMMPfam	PF00248	Aldo_ket_red	49	346	1.2e-61	IPR001395	Aldo/keto reductase;Molecular Function: oxidoreductase activity (GO:0016491), Biological Process: oxidation reduction (GO:0055114
AT5G54110	AT5G54110.1	266	HMMPfam	PF00635	Motile_Sperm	77	189	3.2e-24	IPR000535	Major sperm protein;Molecular Function: structural molecule activity (GO:0005198
AT5G54600	AT5G54600.2	179	HMMPfam	PF00467	KOW	76	102	5.7e-05	IPR005824	KO
AT5G54600	AT5G54600.1	198	HMMPfam	PF00467	KOW	76	106	7e-09	IPR005824	KO
AT5G59950	AT5G59950.2	178	HMMPfam	PF00076	RRM_1	24	92	2.8e-10	IPR000504	RNA recognition motif, RNP-1;Molecular Function: nucleic acid binding (GO:0003676
AT5G59950	AT5G59950.3	242	HMMPfam	PF00076	RRM_1	88	156	5.40000000000001e-10	IPR000504	RNA recognition motif, RNP-1;Molecular Function: nucleic acid binding (GO:0003676
AT5G59950	AT5G59950.1;AT5G59950.4;AT5G59950.5	244;211;245	HMMPfam	PF00076	RRM_1	90	158	5.40000000000001e-10;4.1e-10;6.9e-13	IPR000504	RNA recognition motif, RNP-1;Molecular Function: nucleic acid binding (GO:0003676
AT5G60390	AT5G60390.2;AT5G60390.3;AT5G60390.1	400;449	HMMPfam	PF00009	GTP_EFTU	7	222	1.29999999999998e-52;2.2e-55	IPR000795	Protein synthesis factor, GTP-binding;Molecular Function: GTPase activity (GO:0003924), Molecular Function: GTP binding (GO:0005525
AT5G60390	AT5G60390.2	400	HMMPfam	PF03143	GTP_EFTU_D3	322	378	6e-09	IPR004160	Translation elongation factor EFTu/EF1A, C-terminal;Molecular Function: GTP binding (GO:0005525
AT5G60390	AT5G60390.3;AT5G60390.1	449	HMMPfam	PF03143	GTP_EFTU_D3	322	429	1.5e-32	IPR004160	Translation elongation factor EFTu/EF1A, C-terminal;Molecular Function: GTP binding (GO:0005525
AT5G60390	AT5G60390.2;AT5G60390.3;AT5G60390.1	400;449	HMMPfam	PF03144	GTP_EFTU_D2	248	314	4.2e-13;6.4e-16	IPR004161	Translation elongation factor EFTu/EF1A, domain 2;Molecular Function: GTP binding (GO:0005525
AT5G62300	AT5G62300.1;AT5G62300.2	124	HMMPfam	PF00338	Ribosomal_S10	25	121	1.2e-27	IPR001848	Ribosomal protein S10;Molecular Function: structural constituent of ribosome (GO:0003735), Cellular Component: intracellular (GO:0005622), Cellular Component: ribosome (GO:0005840), Biological Process: translation (GO:0006412
AT5G62350	AT5G62350.1	202	HMMPfam	PF04043	PMEI	35	194	9.50000000000005e-36	IPR006501	Pectinesterase inhibitor;Molecular Function: enzyme inhibitor activity (GO:0004857), Molecular Function: pectinesterase activity (GO:0030599
AT5G63140	AT5G63140.1	389	HMMPfam	PF00149	Metallophos	47	306	2.2e-09	IPR004843	Metallophosphoesterase;Molecular Function: hydrolase activity (GO:0016787
AT5G63180	AT5G63180.1	432	HMMPfam	PF00544	Pec_lyase_C	152	347	2.1e-61	IPR002022	Pectate lyase/Amb allerge
AT5G63420	AT5G63420.1	911	HMMPfam	PF00753	Lactamase_B	119	279	6.60000000000002e-19	NULL	NUL
AT5G63420	AT5G63420.1	911	HMMPfam	PF07521	RMMBL	465	496	9.9e-07	IPR011108	RNA-metabolising metallo-beta-lactamas
AT5G64050	AT5G64050.1	570	HMMPfam	PF00749	tRNA-synt_1c	53	370	2.70000000000002e-102	IPR020058	Glutamyl/glutaminyl-tRNA synthetase, class Ic, catalytic domain;Molecular Function: nucleotide binding (GO:0000166), Molecular Function: ATP binding (GO:0005524), Cellular Component: cytoplasm (GO:0005737), Biological Process: translation (GO:0006412), Molecular Function: ligase activity, forming aminoacyl-tRNA and related compounds (GO:0016876), Biological Process: tRNA aminoacylation (GO:0043039
AT5G64260	AT5G64260.1	305	HMMPfam	PF04674	Phi_1	33	305	6.10000000000004e-121	IPR006766	Phosphate-induced protein
AT5G64270	AT5G64270.1	1269	HMMPfam	PF02985	HEAT	650	678	5.4	IPR000357	HEA
AT5G64270	AT5G64270.1	1269	HMMPfam	PF08920	SF3b1	283	419	7.10000000000008e-39	IPR015016	Splicing factor 3B subunit
AT5G67630	AT5G67630.1	469	HMMPfam	PF06068	TIP49	17	407	0	IPR010339	TIP49, C-terminal;Molecular Function: DNA helicase activity (GO:0003678), Molecular Function: ATP binding (GO:0005524
ATCG00180	ATCG00180.1	680	HMMPfam	PF00623	RNA_pol_Rpb1_2	373	514	1.70000000000001e-42	IPR000722	RNA polymerase, alpha subunit;Molecular Function: DNA binding (GO:0003677), Molecular Function: DNA-directed RNA polymerase activity (GO:0003899), Biological Process: transcription (GO:0006350
ATCG00180	ATCG00180.1	680	HMMPfam	PF04983	RNA_pol_Rpb1_3	518	593	0.0057	IPR007066	RNA polymerase Rpb1, domain 3;Molecular Function: DNA binding (GO:0003677), Molecular Function: DNA-directed RNA polymerase activity (GO:0003899), Biological Process: transcription (GO:0006350
ATCG00180	ATCG00180.1	680	HMMPfam	PF04997	RNA_pol_Rpb1_1	8	371	9e-55	IPR007080	RNA polymerase Rpb1, domain 1;Molecular Function: DNA binding (GO:0003677), Molecular Function: DNA-directed RNA polymerase activity (GO:0003899), Biological Process: transcription (GO:0006350
ATCG00820	ATCG00820.1	92	HMMPfam	PF00203	Ribosomal_S19	3	83	1.6e-38	IPR002222	Ribosomal protein S19/S15;Molecular Function: structural constituent of ribosome (GO:0003735), Cellular Component: intracellular (GO:0005622), Cellular Component: ribosome (GO:0005840), Biological Process: translation (GO:0006412
